# Supplementary material for: Lack of activity of recombinant HIF prolyl hydroxylases (PHDs) on reported non-HIF substrates
Source: PubMed Central journal article supplement (PMC6739866; doi:10.7554/elife.46490), 2019-09-10

## **Supplementary File 2**

**B-01:** HIF Control A  
Alt Substrate: NDRG3

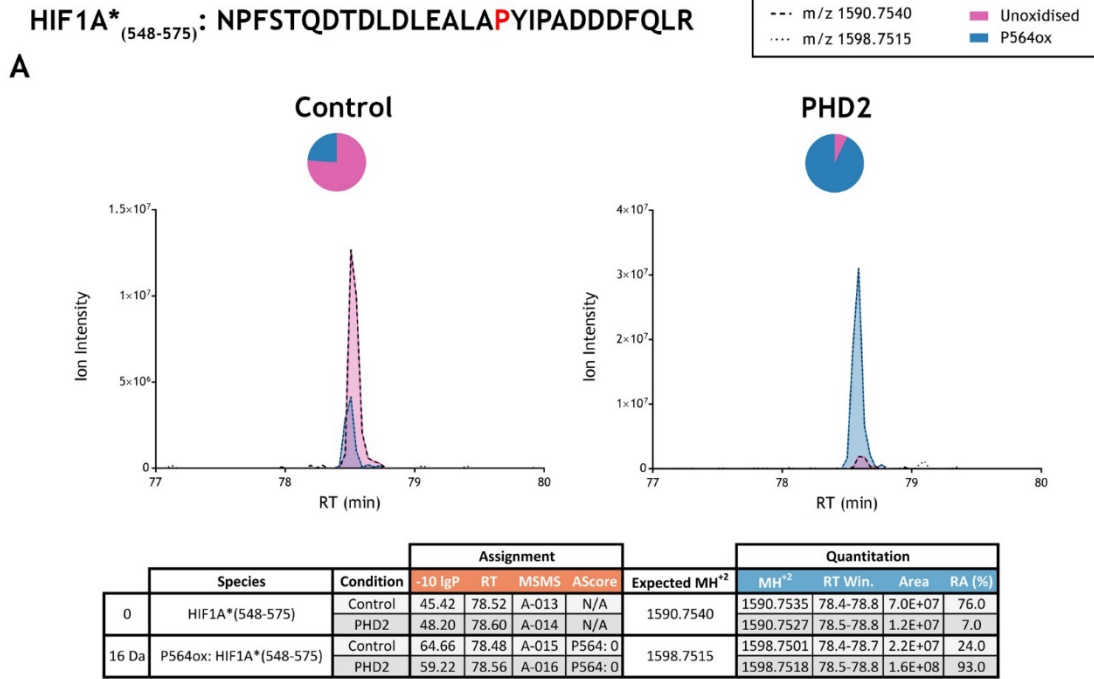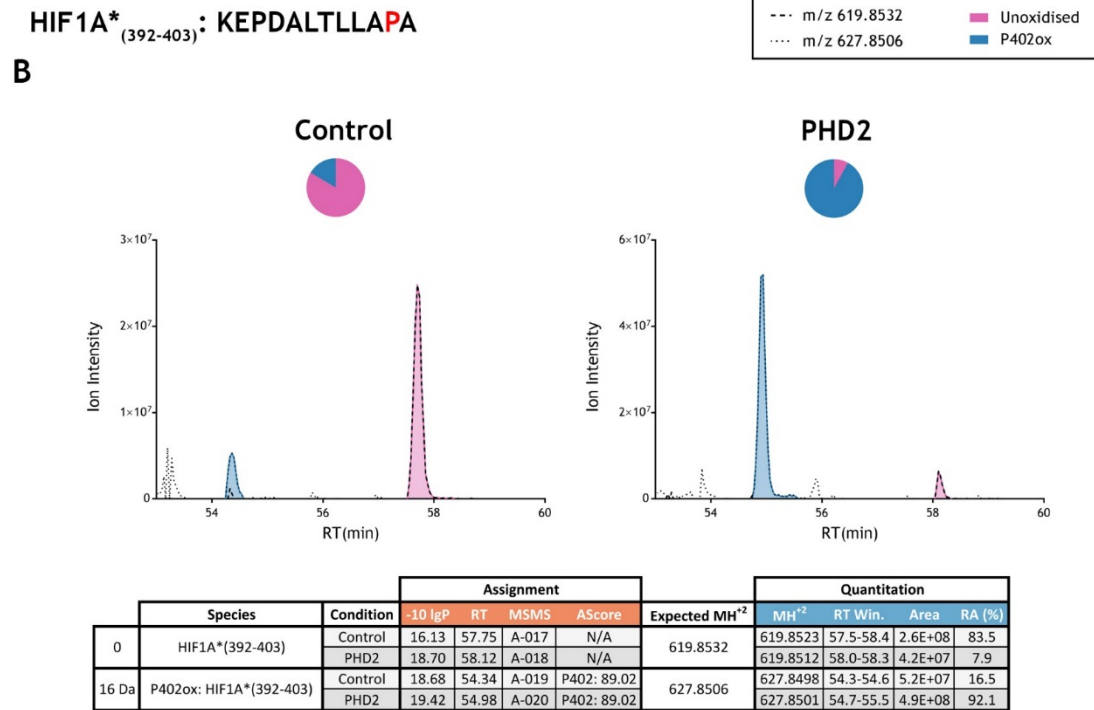

B-02:

HIF Control B

Alt Substrate: SPRY2 & TP53 (PHD1); EPOR & MAPK6 (PHD3)

HIF1A\*<sub>(548-575)</sub>: NPFSTQDTLDLEALAPYIPADDDFQLR

A

--- m/z 1590.7540  
 ..... m/z 1598.7515  
 Unoxidised  
 P564ox

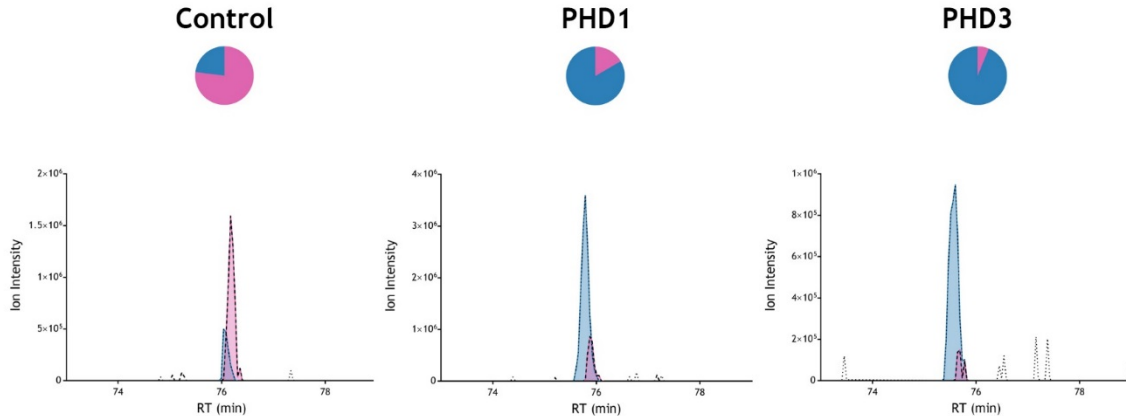

|       | Species                 | Condition | Assignment |       |       |         | Expected MH <sup>2</sup> | Quantitation    |           |          |        |
|-------|-------------------------|-----------|------------|-------|-------|---------|--------------------------|-----------------|-----------|----------|--------|
|       |                         |           | -10 lgP    | RT    | MSMS  | AScore  |                          | MH <sup>2</sup> | RT Win.   | Area     | RA (%) |
| 0     | HIF1A*(548-575)         | Control   | 54.33      | 76.14 | A-021 | N/A     | 1590.7540                | 1590.7566       | 76.0-76.4 | 1.4E+07  | 76.9   |
|       |                         | PHD1      | 33.32      | 75.84 | A-022 | N/A     |                          | 1590.7517       | 75.8-76.1 | 7.3E+06  | 16.6   |
|       |                         | PHD3      | ND         |       |       |         |                          | 1590.7514       | 75.6-75.7 | 8.1E+05  | 6.2    |
| 16 Da | P564ox: HIF1A*(548-575) | Control   | 43.64      | 76.06 | A-023 | P564: 0 | 1598.7515                | 1598.7590       | 76.0-76.3 | 4.17E+06 | 23.1   |
|       |                         | PHD1      | 43.17      | 75.84 | A-024 | P564: 0 |                          | 1598.7491       | 75.6-76.1 | 3.66E+07 | 83.4   |
|       |                         | PHD3      | 38.54      | 75.53 | A-025 | P564: 0 |                          | 1598.7510       | 75.3-75.9 | 1.22E+07 | 93.8   |

HIF1A\*<sub>(392-403)</sub>: KEPDALTLAPA

B

--- m/z 619.8532  
 ..... m/z 627.8506  
 Unoxidised  
 P402ox

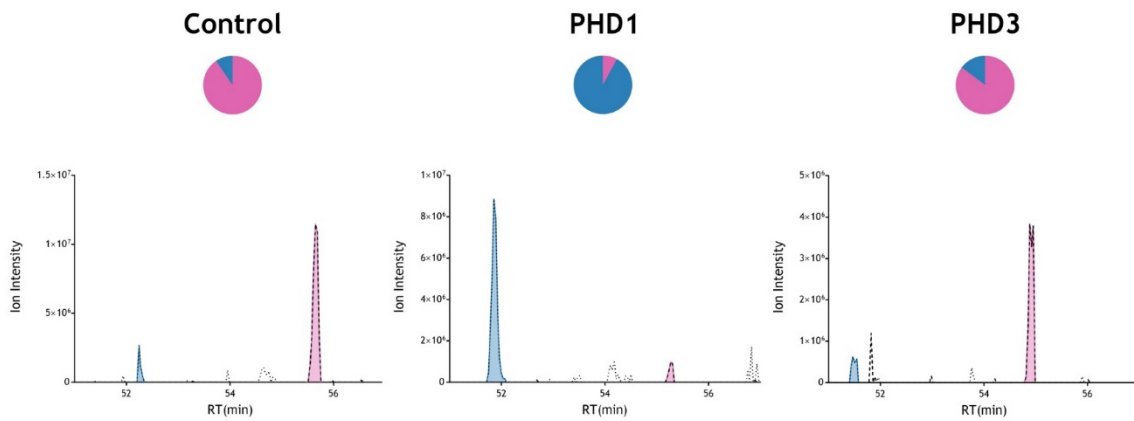

|       | Species                 | Condition | Assignment |       |       |             | Expected MH <sup>2</sup> | Quantitation    |           |          |        |
|-------|-------------------------|-----------|------------|-------|-------|-------------|--------------------------|-----------------|-----------|----------|--------|
|       |                         |           | -10 lgP    | RT    | MSMS  | AScore      |                          | MH <sup>2</sup> | RT Win.   | Area     | RA (%) |
| 0     | HIF1A*(392-403)         | Control   | 16.96      | 55.61 | A-026 | N/A         | 619.8532                 | 619.8524        | 55.5-55.7 | 8.3E+07  | 90.5   |
|       |                         | PHD1      | ND         |       |       |             |                          | 619.8528        | 55.2-55.3 | 5.5E+06  | 7.9    |
|       |                         | PHD3      | 18.11      | 54.94 | A-027 | N/A         |                          | 619.8519        | 54.8-54.9 | 2.6E+07  | 85.2   |
| 16 Da | P402ox: HIF1A*(392-403) | Control   | ND         |       |       |             | 627.8506                 | 627.8477        | 52.2-52.3 | 8.67E+06 | 9.5    |
|       |                         | PHD1      | 18.30      | 51.82 | A-028 | P402: 73.62 |                          | 627.8496        | 51.7-52.1 | 6.43E+07 | 92.1   |
|       |                         | PHD3      | ND         |       |       |             |                          | 627.8491        | 51.4-51.5 | 4.44E+06 | 14.8   |

**B-03:** HIF Control C  
Alt Substrate: CENPN & FLNA

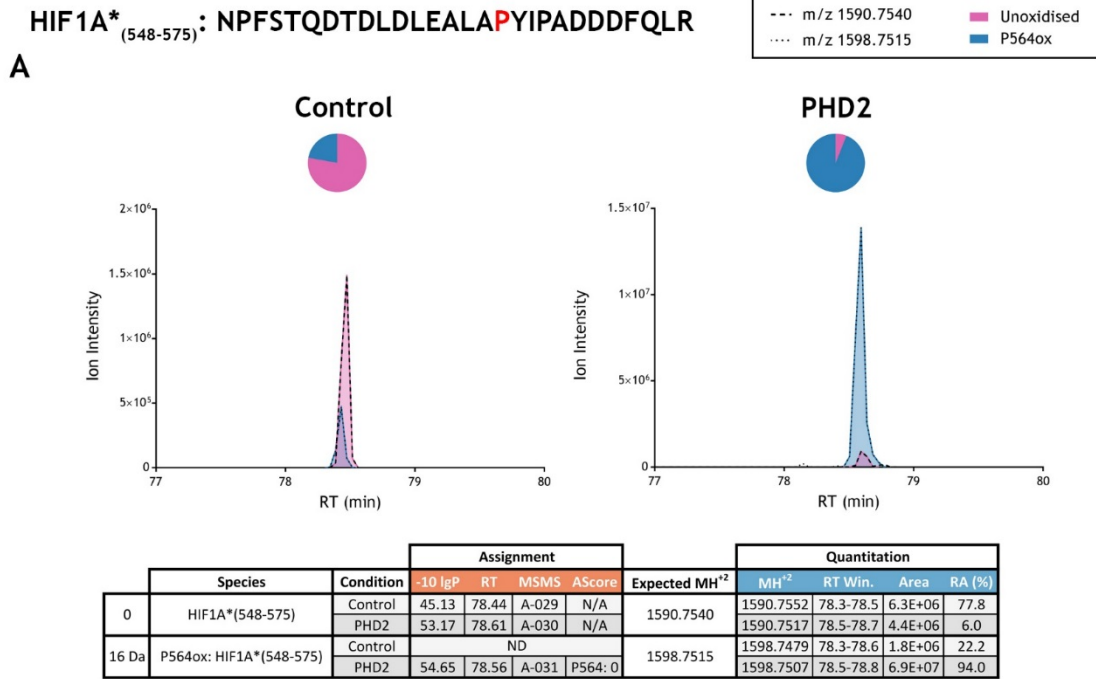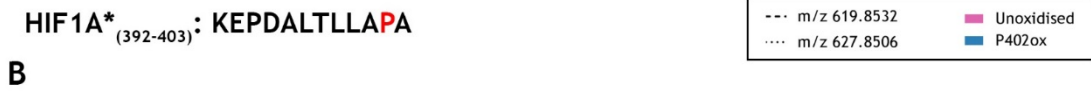

Peptide Not Detected

B-04:

HIF Control D

Alt Substrate: ACTB, ADRB2, ATF4 & PKM

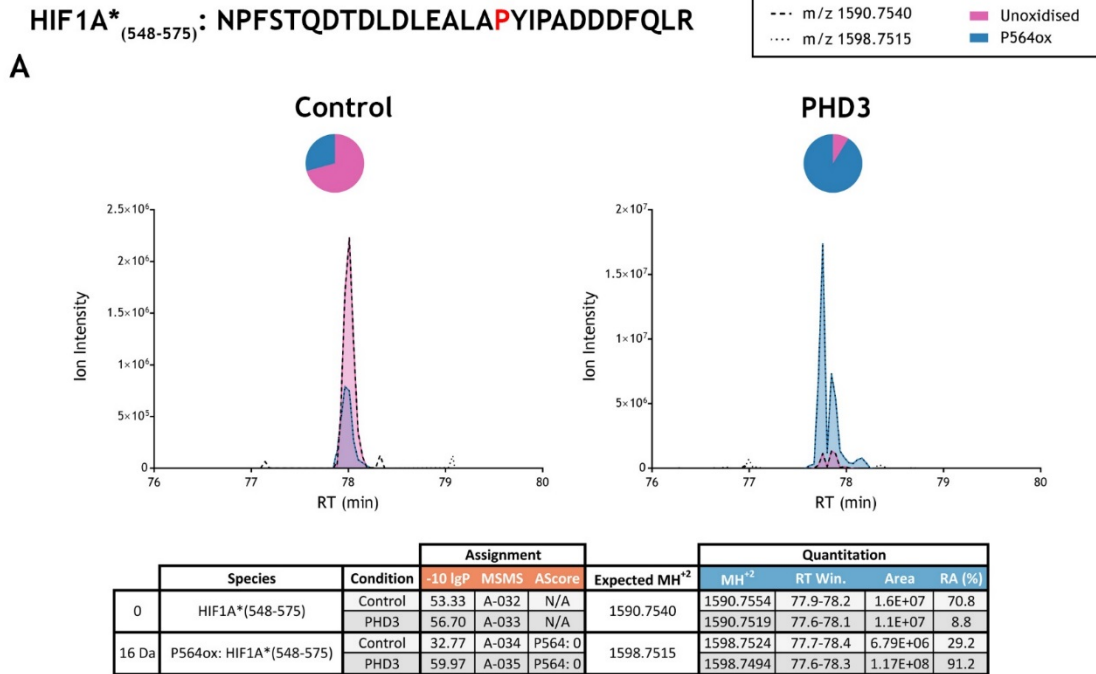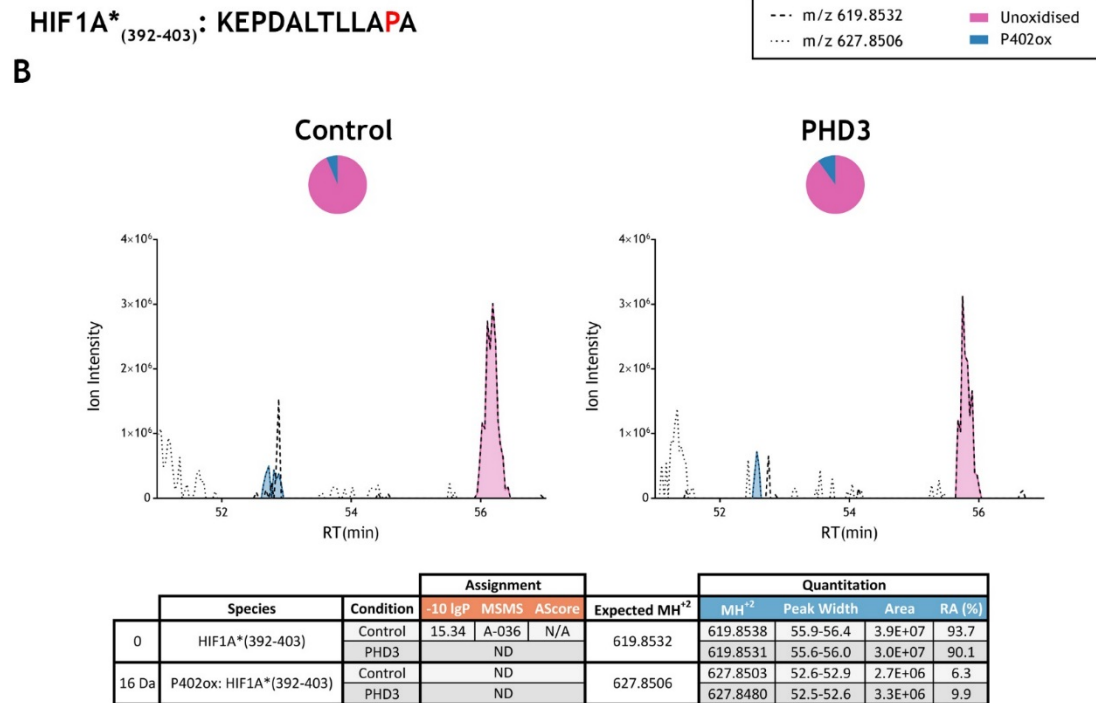

B-05:

HIF Control E

Alt Substrate: SPRY2 & TELO2

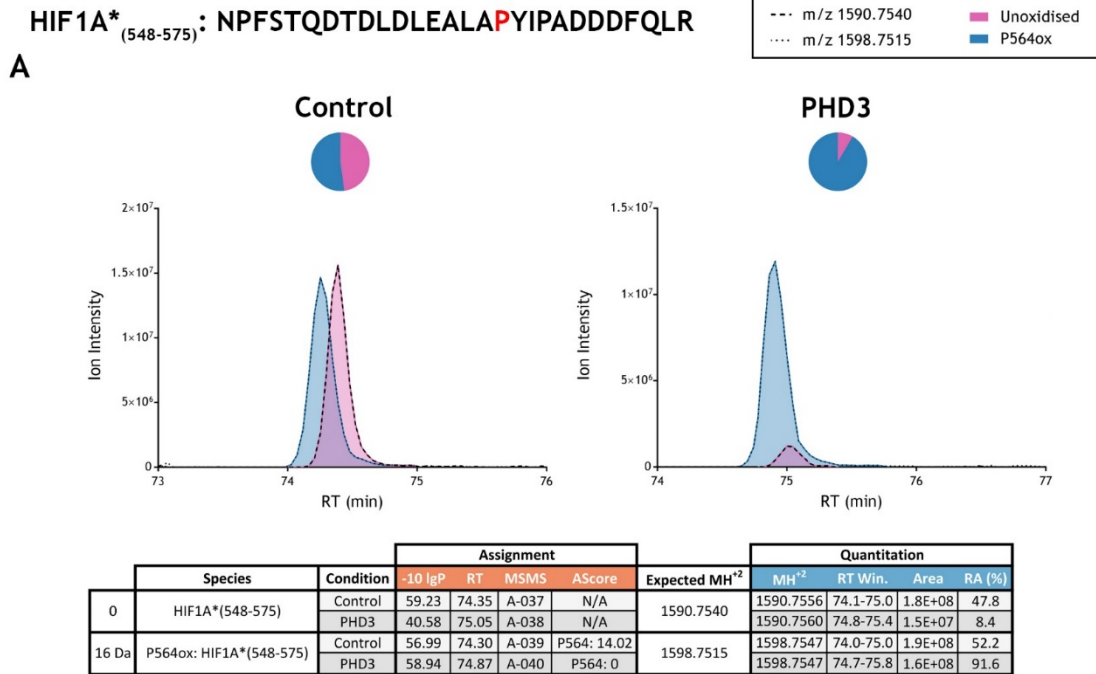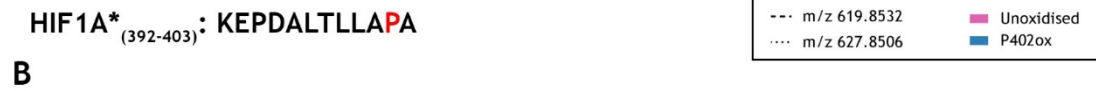

B-06:

HIF Control F  
Alt Substrate: CEP192

HIF1A\*<sub>(548-575)</sub>: NPFSTQDTLDLEALAPYIPADDDFQLR

--- m/z 1590.754    Unoxidised  
... m/z 1598.7515    P564ox

A

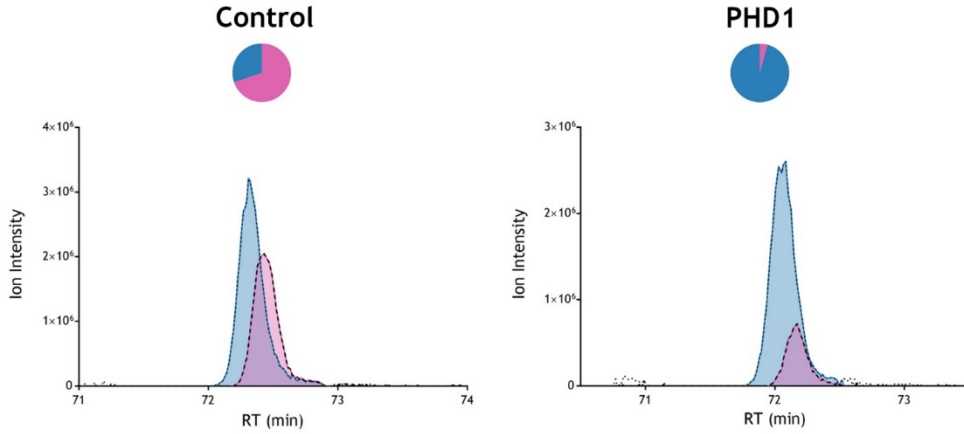

|       | Species                 | Condition | Assignment |       |       |         | Expected MH <sup>2</sup> | Quantitation    |           |         |        |
|-------|-------------------------|-----------|------------|-------|-------|---------|--------------------------|-----------------|-----------|---------|--------|
|       |                         |           | -10 lgP    | RT    | MSMS  | AScore  |                          | MH <sup>2</sup> | RT Win.   | Area    | RA (%) |
| 0     | HIF1A*(548-575)         | Control   | 43.91      | 72.41 | A-041 | N/A     | 1590.7540                | 1590.7566       | 72.2-72.9 | 2.8E+07 | 39.9   |
|       |                         | PHD1      | 16.76      | 72.16 | A-042 | N/A     |                          | 1590.7567       | 72.0-72.5 | 8.3E+06 | 18.4   |
| 16 Da | P564ox: HIF1A*(548-575) | Control   | 52.82      | 72.38 | A-043 | P564: 0 | 1598.7515                | 1598.7535       | 72.1-72.9 | 4.2E+07 | 60.1   |
|       |                         | PHD1      | 49.04      | 72.11 | A-044 | P564: 0 |                          | 1598.7538       | 71.8-72.5 | 3.7E+07 | 81.6   |

HIF1A\*<sub>(392-403)</sub>: KEPDALTL LAPA

--- m/z 619.8532    Unoxidised  
... m/z 627.8506    P402ox

B

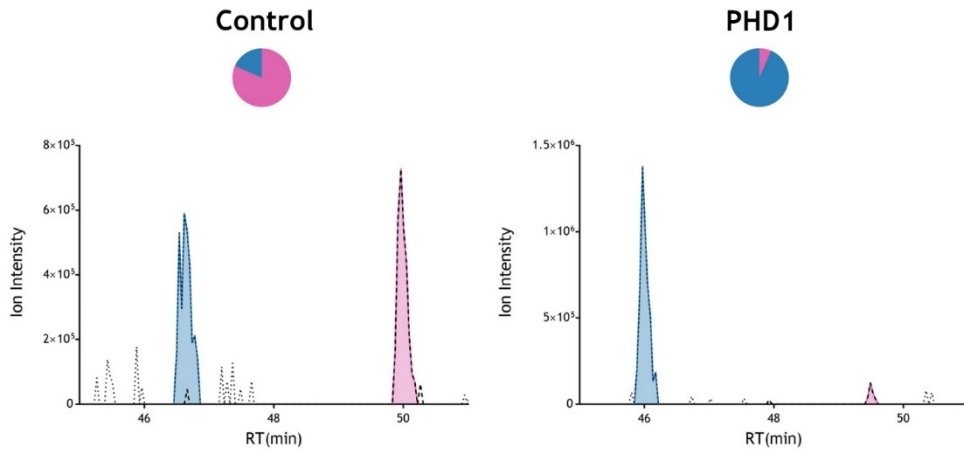

|       | Species                 | Condition | Assignment |       |       |             | Expected MH <sup>2</sup> | Quantitation    |           |         |        |
|-------|-------------------------|-----------|------------|-------|-------|-------------|--------------------------|-----------------|-----------|---------|--------|
|       |                         |           | -10 lgP    | RT    | MSMS  | AScore      |                          | MH <sup>2</sup> | RT Win.   | Area    | RA (%) |
| 0     | HIF1A*(392-403)         | Control   |            |       | ND    |             | 619.8532                 | 619.8527        | 49.9-50.2 | 7.3E+06 | 49.4   |
|       |                         | PHD1      |            |       | ND    |             |                          | 619.8521        | 49.4-49.6 | 6.2E+05 | 5.0    |
| 16 Da | P402ox: HIF1A*(392-403) | Control   |            |       | ND    |             | 627.8506                 | 627.8506        | 46.5-46.8 | 7.5E+06 | 50.6   |
|       |                         | PHD1      | 15.48      | 46.01 | A-045 | P402: 73.62 |                          | 627.8510        | 45.9-46.2 | 1.2E+07 | 95.0   |

B-07:

HIF Control G

Alt Substrate: FOXO3 & IKBKB

HIF1A\*  
(548-575): NPFSTQDTLDLEALAPYIPADDDFQLR

--- m/z 1590.7540  
 .... m/z 1598.7515  
 Unoxidised  
 P564ox

A

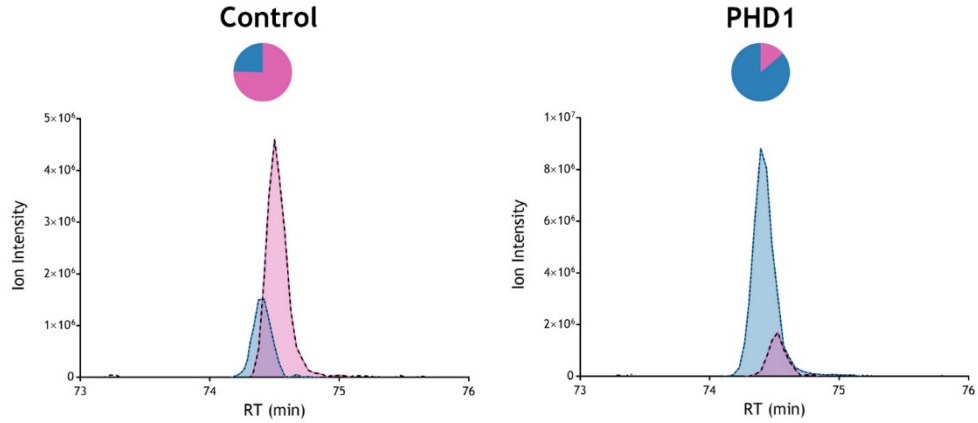

|       | Species                 | Condition | Assignment |       |       |         | Quantitation             |                 |            |         |        |
|-------|-------------------------|-----------|------------|-------|-------|---------|--------------------------|-----------------|------------|---------|--------|
|       |                         |           | -10 IgP    | RT    | MSMS  | AScore  | Expected MH <sup>2</sup> | MH <sup>2</sup> | RT Win.    | Area    | RA (%) |
| 0     | HIF1A*(548-575)         | Control   | 45.06      | 74.54 | A-048 | N/A     | 1590.7540                | 1590.7502       | 74.3-75.0  | 5.0E+07 | 75.5   |
|       |                         | PHD1      | 36.82      | 74.53 | A-049 | N/A     |                          | 1590.7526       | 74.3-74.8  | 1.6E+07 | 13.8   |
| 16 Da | P564ox: HIF1A*(548-575) | Control   | 26.75      | 74.42 | A-050 | P564: 0 | 1598.7515                | 1598.7496       | 74.2-74.8  | 1.6E+07 | 24.5   |
|       |                         | PHD1      | 53.54      | 74.40 | A-051 | P564: 0 |                          | 1598.7502       | 74.1-75.-1 | 1.0E+08 | 86.2   |

HIF1A\*  
(392-403): KEPDALTLLAPA

--- m/z 619.8532  
 .... m/z 627.8506  
 Unoxidised  
 P402ox

B

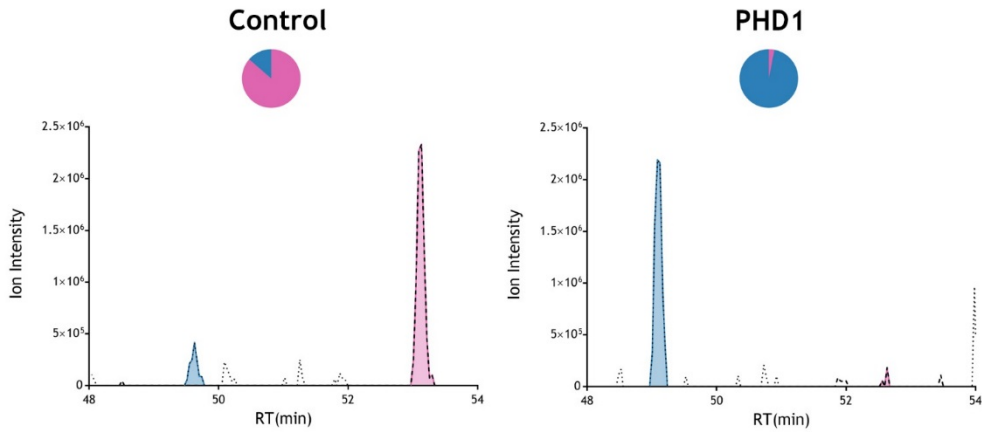

|       | Species                 | Condition | Assignment |       |       |             | Quantitation             |                 |           |         |        |
|-------|-------------------------|-----------|------------|-------|-------|-------------|--------------------------|-----------------|-----------|---------|--------|
|       |                         |           | -10 IgP    | RT    | MSMS  | AScore      | Expected MH <sup>2</sup> | MH <sup>2</sup> | RT Win.   | Area    | RA (%) |
| 0     | HIF1A*(392-403)         | Control   | 14.79      | 53.09 | A-052 | N/A         | 619.8532                 | 619.8532        | 53.0-53.3 | 2.0E+07 | 86.4   |
|       |                         | PHD1      |            |       | ND    |             |                          | 619.8509        | 52.5-52.6 | 5.6E+05 | 3.0    |
| 16 Da | P402ox: HIF1A*(392-403) | Control   |            |       | ND    |             | 627.8506                 | 627.8503        | 49.5-49.7 | 3.1E+06 | 13.6   |
|       |                         | PHD1      | 19.51      | 49.08 | A-053 | P402: 73.62 |                          | 627.8515        | 49.0-49.2 | 1.8E+07 | 97.0   |



B-08:

HIF Control H

Alt Substrate: EEF2K, PDE4D & TRPA1

HIF1A\*<sub>(548-575)</sub>: NPFSTQDTLDLEALAPYIPADDDFQLR

A

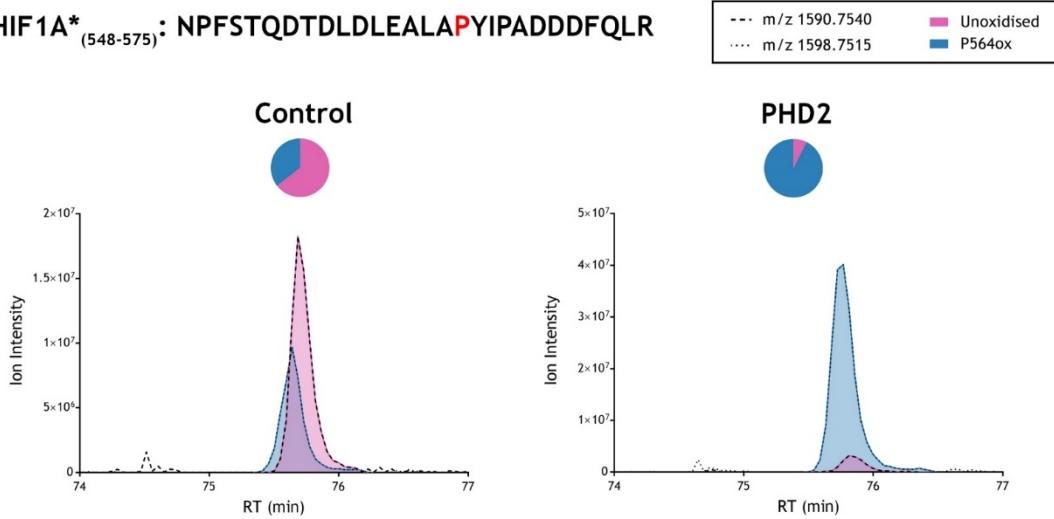

|       | Species                 | Condition | Assignment |       |       |             | Expected MH <sup>+</sup> | Quantitation    |           |         |        |
|-------|-------------------------|-----------|------------|-------|-------|-------------|--------------------------|-----------------|-----------|---------|--------|
|       |                         |           | -10 IgP    | RT    | MSMS  | AScore      |                          | MH <sup>+</sup> | RT Win.   | Area    | RA (%) |
| 0     | HIF1A*(548-575)         | Control   | 62.03      | 75.91 | A-054 | N/A         | 1590.7540                | 1590.7564       | 75.5-76.2 | 2.0E+08 | 64.5   |
|       |                         | PHD2      | 53.10      | 75.82 | A-055 | N/A         |                          | 1590.7574       | 75.6-76.2 | 4.1E+07 | 7.4    |
| 16 Da | P564ox: HIF1A*(548-575) | Control   | 71.54      | 75.73 | A-056 | P564: 8.69  | 1598.7515                | 1598.7527       | 75.4-76.2 | 1.1E+08 | 35.5   |
|       |                         | PHD2      | 60.86      | 75.68 | A-057 | P564: 17.01 |                          | 1598.7544       | 75.5-76.5 | 5.2E+08 | 92.6   |

HIF1A\*<sub>(392-411)</sub>: KEPDALTLAPAAAGDTIISL

B

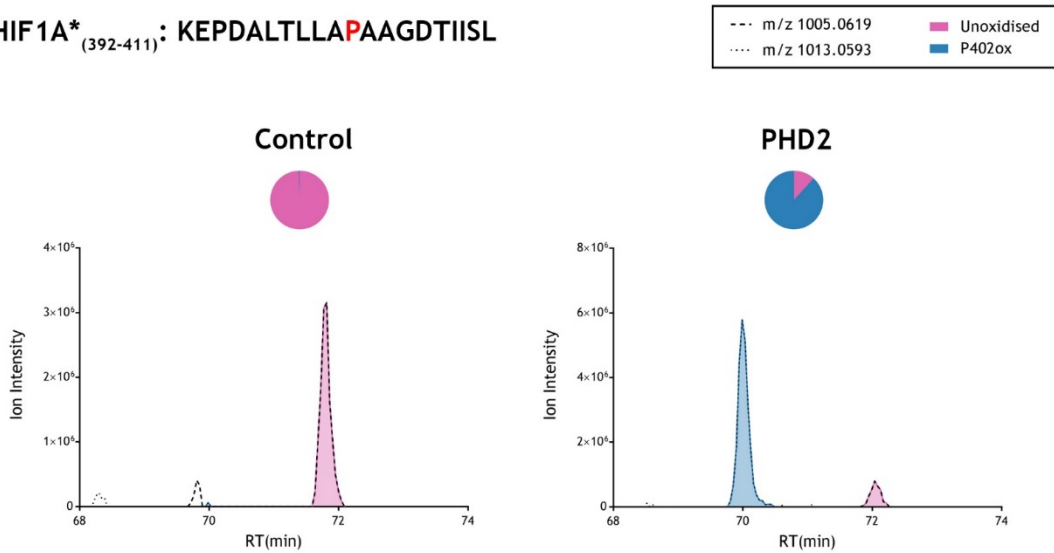

|       | Species                 | Condition | Assignment |       |       |             | Expected MH <sup>+</sup> | Quantitation    |           |         |        |
|-------|-------------------------|-----------|------------|-------|-------|-------------|--------------------------|-----------------|-----------|---------|--------|
|       |                         |           | -10 IgP    | RT    | MSMS  | AScore      |                          | MH <sup>+</sup> | RT Win.   | Area    | RA (%) |
| 0     | HIF1A*(392-411)         | Control   | 35.45      | 71.70 | A-058 | N/A         | 1005.0619                | 1005.0638       | 71.6-72.0 | 3.5E+07 | 99.5   |
|       |                         | PHD2      | 23.08      | 71.97 | A-059 | N/A         |                          | 1005.0605       | 71.9-72.2 | 8.8E+06 | 11.7   |
| 16 Da | P402ox: HIF1A*(392-411) | Control   |            |       | ND    |             | 1013.0593                | 1013.0688       | 69.9-70.0 | 1.7E+05 | 0.5    |
|       |                         | PHD2      | 38.13      | 69.92 | A-060 | P402: 28.70 |                          | 1013.0597       | 69.8-70.4 | 6.6E+07 | 88.3   |

B-09:

HIF Control I  
Alt Substrate: PPP2R2A

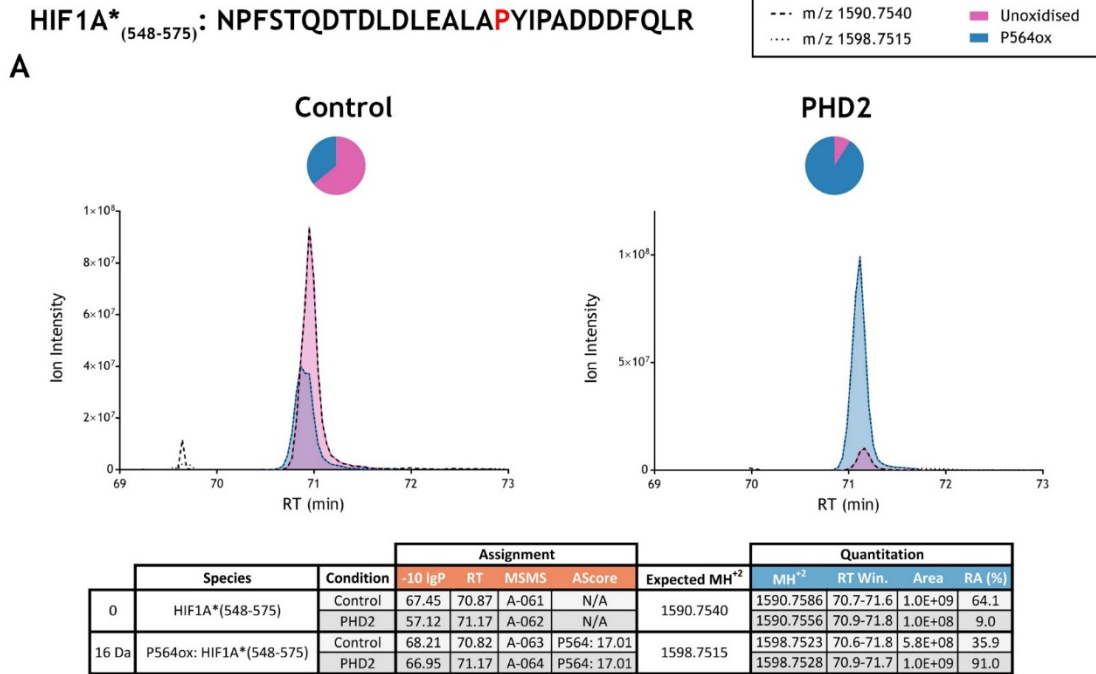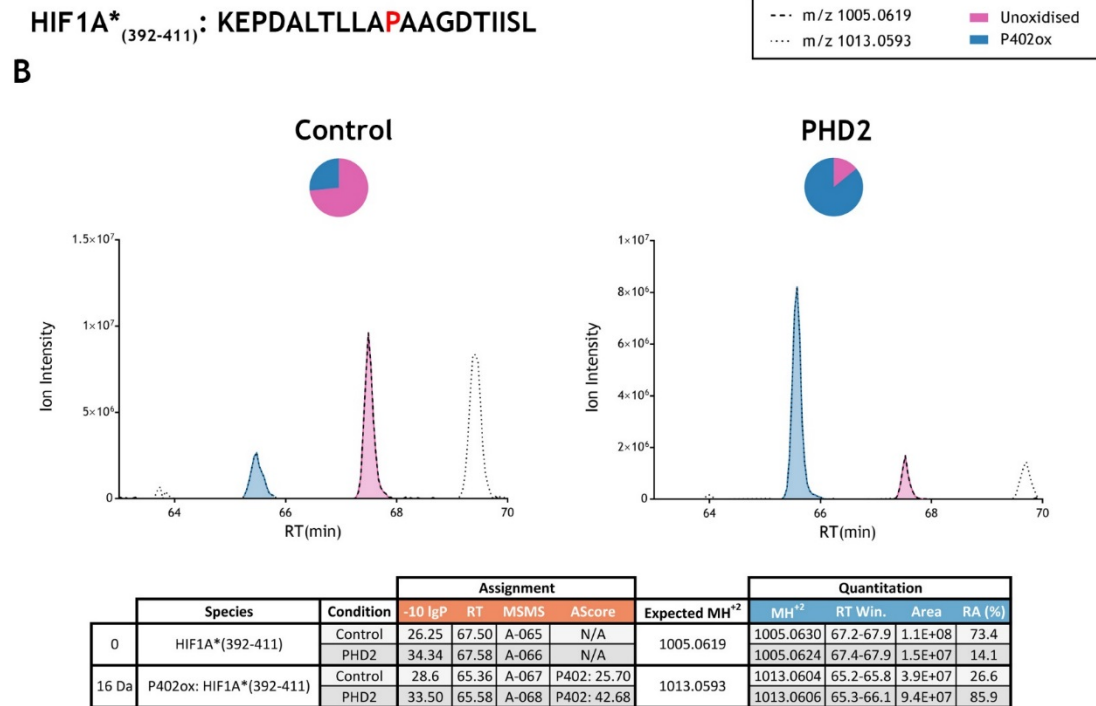

**B-10:** HIF Control J  
Alt Substrate: AKT1

HIF1A\*<sub>(548-575)</sub>: NPFSTQDTLDLEALAP<sup>Y</sup>IPADDDFQLR

--- m/z 1590.754    ■ Unoxidised  
 ..... m/z 1598.7515    ■ P564ox

**A**

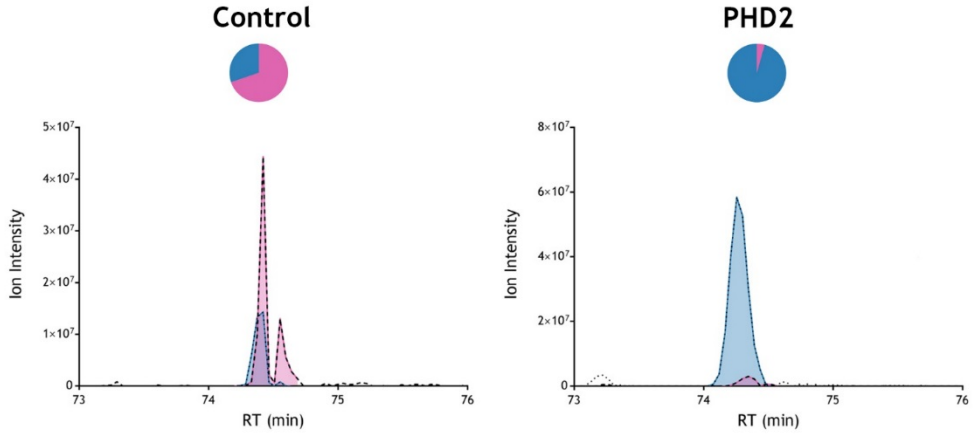

|       | Species                 | Condition | Assignment |       |       |             | Expected MH <sup>2</sup> | Quantitation    |           |         |        |
|-------|-------------------------|-----------|------------|-------|-------|-------------|--------------------------|-----------------|-----------|---------|--------|
|       |                         |           | -10 lgP    | RT    | MSMS  | AScore      |                          | MH <sup>2</sup> | RT Win.   | Area    | RA (%) |
| 0     | HIF1A*(548-575)         | Control   | 62.70      | 74.60 | A-069 | N/A         | 1590.7540                | 1590.7472       | 74.3-74.7 | 2.2E+08 | 69.8   |
|       |                         | PHD2      | 47.88      | 74.26 | A-070 | N/A         |                          | 1590.7518       | 74.1-74.6 | 2.7E+07 | 4.3    |
| 16 Da | P564ox: HIF1A*(548-575) | Control   | 71.20      | 74.43 | A-071 | P564: 12.28 | 1598.7515                | 1598.7491       | 74.2-74.5 | 9.4E+07 | 30.2   |
|       |                         | PHD2      | 56.74      | 74.40 | A-072 | P564: 17.01 |                          | 1598.7476       | 74.0-74.5 | 6.0E+08 | 95.7   |

HIF1A\*<sub>(392-403)</sub>: KEPDAL<sup>T</sup>LLAPA

--- m/z 619.8532    ■ Unoxidised  
 ..... m/z 627.8506    ■ P402ox

**B**

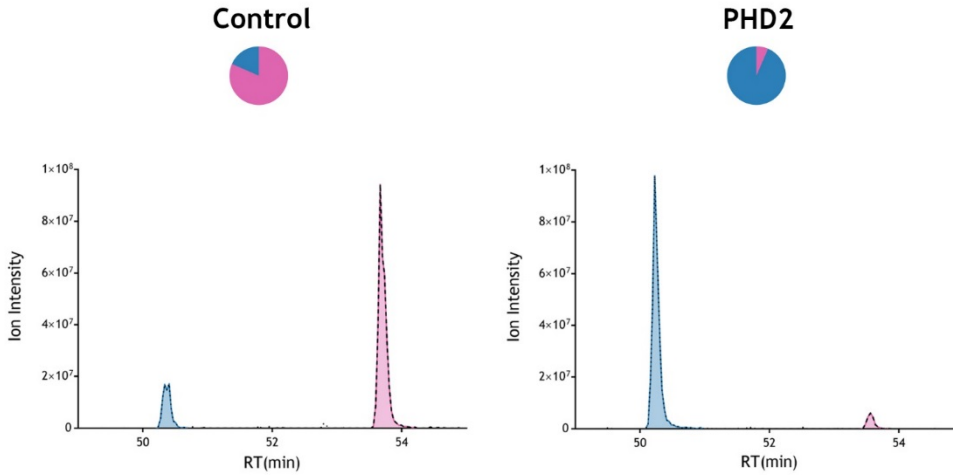

|       | Species                 | Condition | Assignment |       |       |             | Expected MH <sup>2</sup> | Quantitation    |           |         |        |
|-------|-------------------------|-----------|------------|-------|-------|-------------|--------------------------|-----------------|-----------|---------|--------|
|       |                         |           | -10 lgP    | RT    | MSMS  | AScore      |                          | MH <sup>2</sup> | RT Win.   | Area    | RA (%) |
| 0     | HIF1A*(392-403)         | Control   | 20.28      | 53.74 | A-073 | N/A         | 619.8532                 | 619.8528        | 53.6-54.2 | 6.9E+08 | 81.6   |
|       |                         | PHD2      | 11.93      | 53.33 | A-074 | N/A         |                          | 619.8531        | 53.4-53.9 | 4.6E+07 | 6.5    |
| 16 Da | P402ox: HIF1A*(392-403) | Control   | 18.49      | 50.38 | A-075 | P402: 64.33 | 627.8506                 | 627.8496        | 50.2-50.7 | 1.6E+08 | 18.4   |
|       |                         | PHD2      | 16.28      | 50.31 | A-076 | P402: 89.40 |                          | 627.8505        | 50.1-50.9 | 6.7E+08 | 93.5   |

**B-11:** HIF Control K  
Alt Substrate: ACACB

HIF1A\*<sub>(548-575)</sub>: NPFSTQD<sup>T</sup>DL<sup>D</sup>LEALAP<sup>Y</sup>IPADDD<sup>F</sup>QLR

**A**

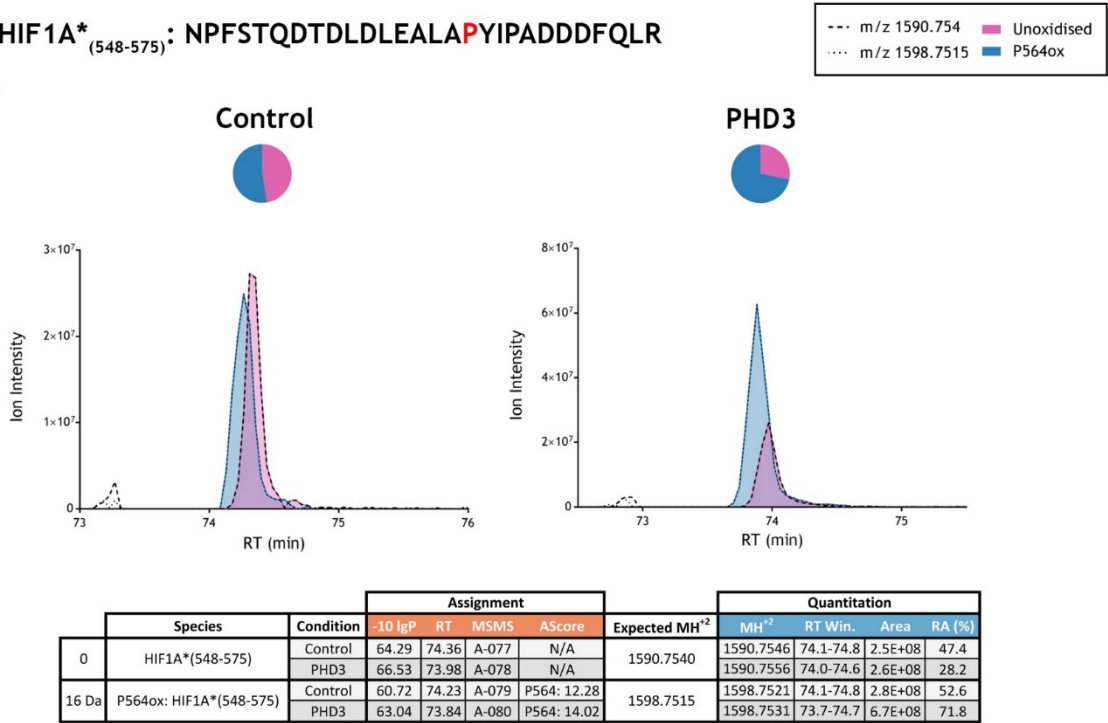

HIF1A\*<sub>(392-403)</sub>: KEPDAL<sup>T</sup>LL<sup>D</sup>L<sup>D</sup>APA

**B**

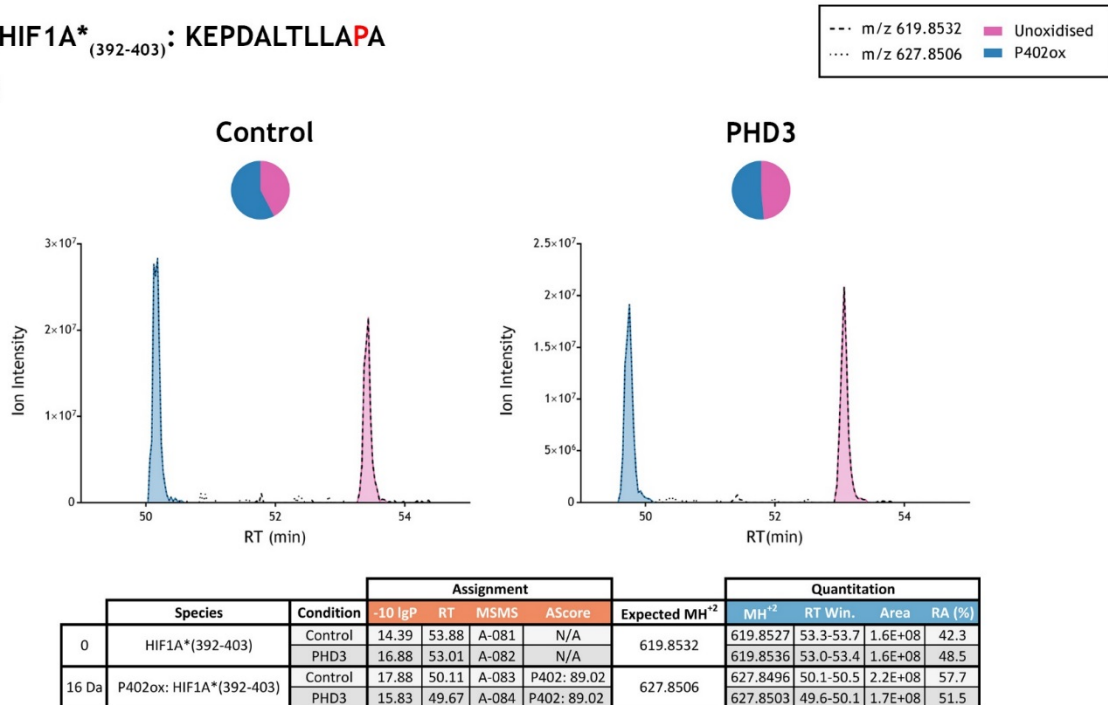

**B-12:** HIF Control L  
Alt Substrate: THRA

HIF1A\*<sub>(548-575)</sub>: NPFSTQDTLDLEALAP<sup>Y</sup>IPADDDFQLR

**A**

--- m/z 1590.7540    ■ Unoxidised  
 ..... m/z 1598.7515    ■ P564ox

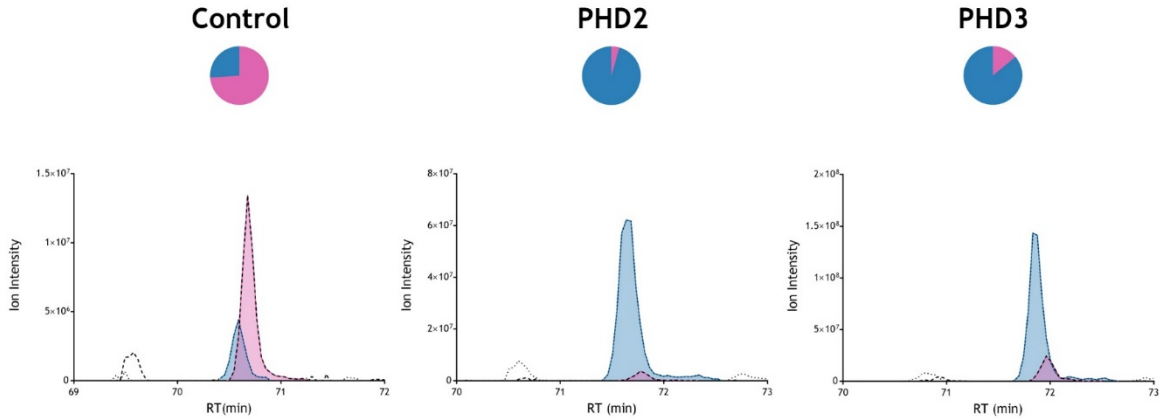

|       | Species                 | Condition | Assignment |       |       |             | Expected MH <sup>+</sup> | Quantitation    |           |         |        |
|-------|-------------------------|-----------|------------|-------|-------|-------------|--------------------------|-----------------|-----------|---------|--------|
|       |                         |           | -10 IgP    | RT    | MSMS  | AScore      |                          | MH <sup>+</sup> | RT Win.   | Area    | RA (%) |
| 0     | HIF1A*(548-575)         | Control   | 56.93      | 70.73 | A-092 | N/A         | 1590.7540                | 1590.7555       | 70.5-71.3 | 1.2E+08 | 73.9   |
|       |                         | PHD2      | 48.29      | 71.82 | A-093 | N/A         |                          | 1590.7540       | 71.6-72.4 | 4.0E+07 | 4.4    |
|       |                         | PHD3      | 62.31      | 72.01 | A-094 | N/A         |                          | 1590.7533       | 71.8-72.5 | 2.4E+08 | 14.0   |
| 16 Da | P564ox: HIF1A*(548-575) | Control   | 55.98      | 70.64 | A-095 | P564: 0     | 1598.7515                | 1598.7516       | 70.4-70.9 | 4.2E+07 | 26.1   |
|       |                         | PHD2      | 56.49      | 71.47 | A-096 | P564: 17.01 |                          | 1598.7519       | 71.4-72.6 | 8.6E+08 | 95.6   |
|       |                         | PHD3      | 66.58      | 71.84 | A-097 | P564: 14.02 |                          | 1598.7507       | 71.7-72.7 | 1.5E+09 | 86.0   |

HIF1A\*<sub>(392-403)</sub>: KEPDAL<sup>T</sup>LL<sup>A</sup>PA

**B**

--- m/z 619.8532    ■ Unoxidised  
 ..... m/z 627.8506    ■ P402ox

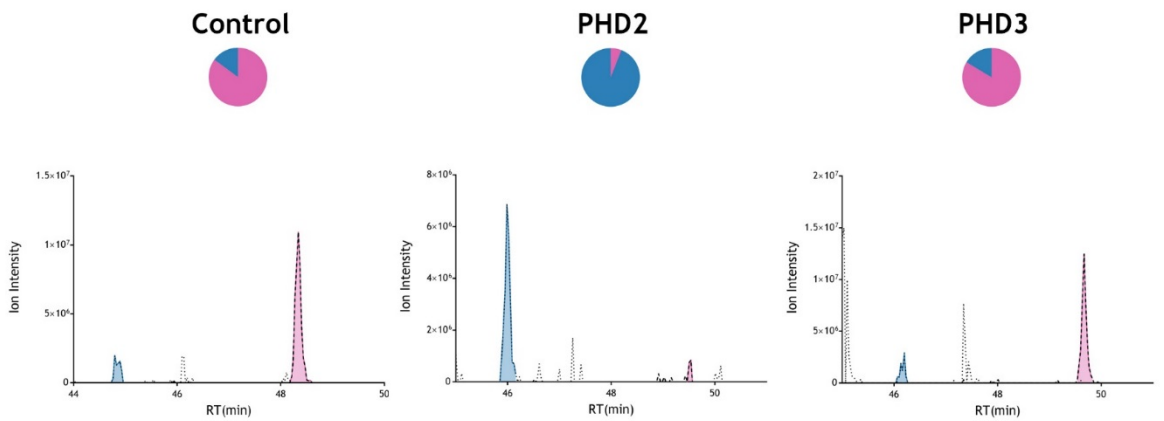

|       | Species                 | Condition | Assignment |       |       |             | Expected MH <sup>+</sup> | Quantitation    |           |         |        |
|-------|-------------------------|-----------|------------|-------|-------|-------------|--------------------------|-----------------|-----------|---------|--------|
|       |                         |           | -10 IgP    | RT    | MSMS  | AScore      |                          | MH <sup>+</sup> | RT Win.   | Area    | RA (%) |
| 0     | HIF1A*(392-403)         | Control   | 16.06      | 48.29 | A-098 | N/A         | 619.8532                 | 619.8533        | 48.2-48.6 | 8.5E+07 | 85.1   |
|       |                         | PHD2      |            |       | ND    |             |                          | 619.8543        | 49.5      | 3.2E+06 | 6.0    |
|       |                         | PHD3      | 12.43      | 49.68 | A-099 | N/A         |                          | 619.8521        | 49.5-49.9 | 7.8E+07 | 83.6   |
| 16 Da | P402ox: HIF1A*(392-403) | Control   |            |       | ND    |             | 627.8506                 | 627.8512        | 44.7-45.0 | 1.5E+07 | 14.9   |
|       |                         | PHD2      | 22.48      | 45.97 | A-100 | P402: 73.62 |                          | 627.8510        | 45.9-46.2 | 4.9E+07 | 94.0   |
|       |                         | PHD3      |            |       | ND    |             |                          | 627.8490        | 46.0-46.3 | 1.5E+07 | 16.4   |

**B-13:** HIF Control M  
Alt Substrate: TP53

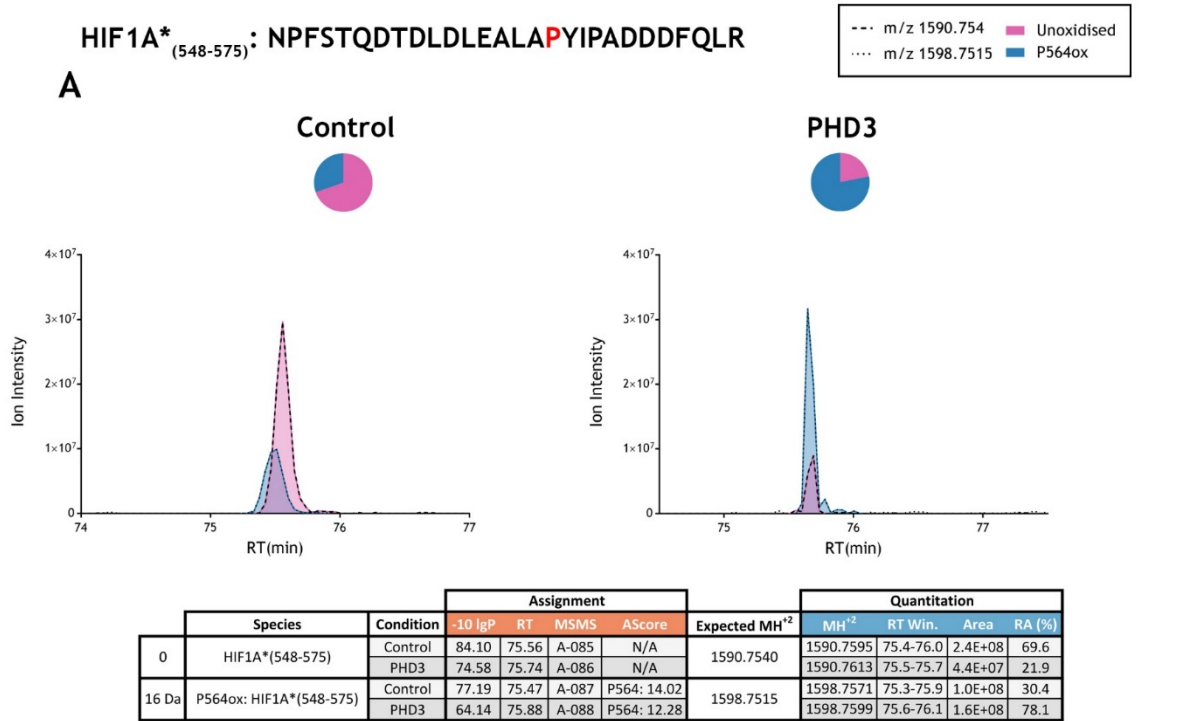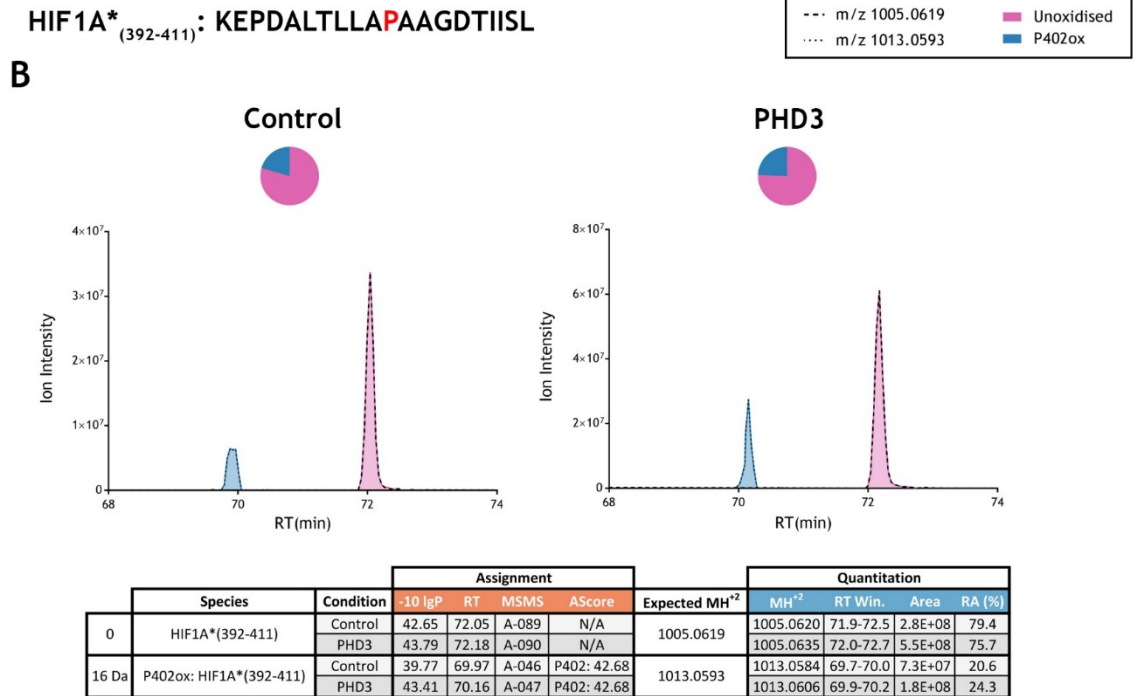

Supplement: elife-46490-supp2.pdf [file elife-46490-supp2.pdf]
