# Supplementary material for: Lack of activity of recombinant HIF prolyl hydroxylases (PHDs) on reported non-HIF substrates
Source: PubMed Central journal article supplement (PMC6739866; doi:10.7554/elife.46490), 2019-09-10
Supplement: elife-46490-supp1.pdf [file elife-46490-supp1.pdf]

## **Supplementary file 1**

A-001: HIF1A<sub>(548-575)</sub>: NPFSTQDTLDLEMLAPYIPMDDDFQLR

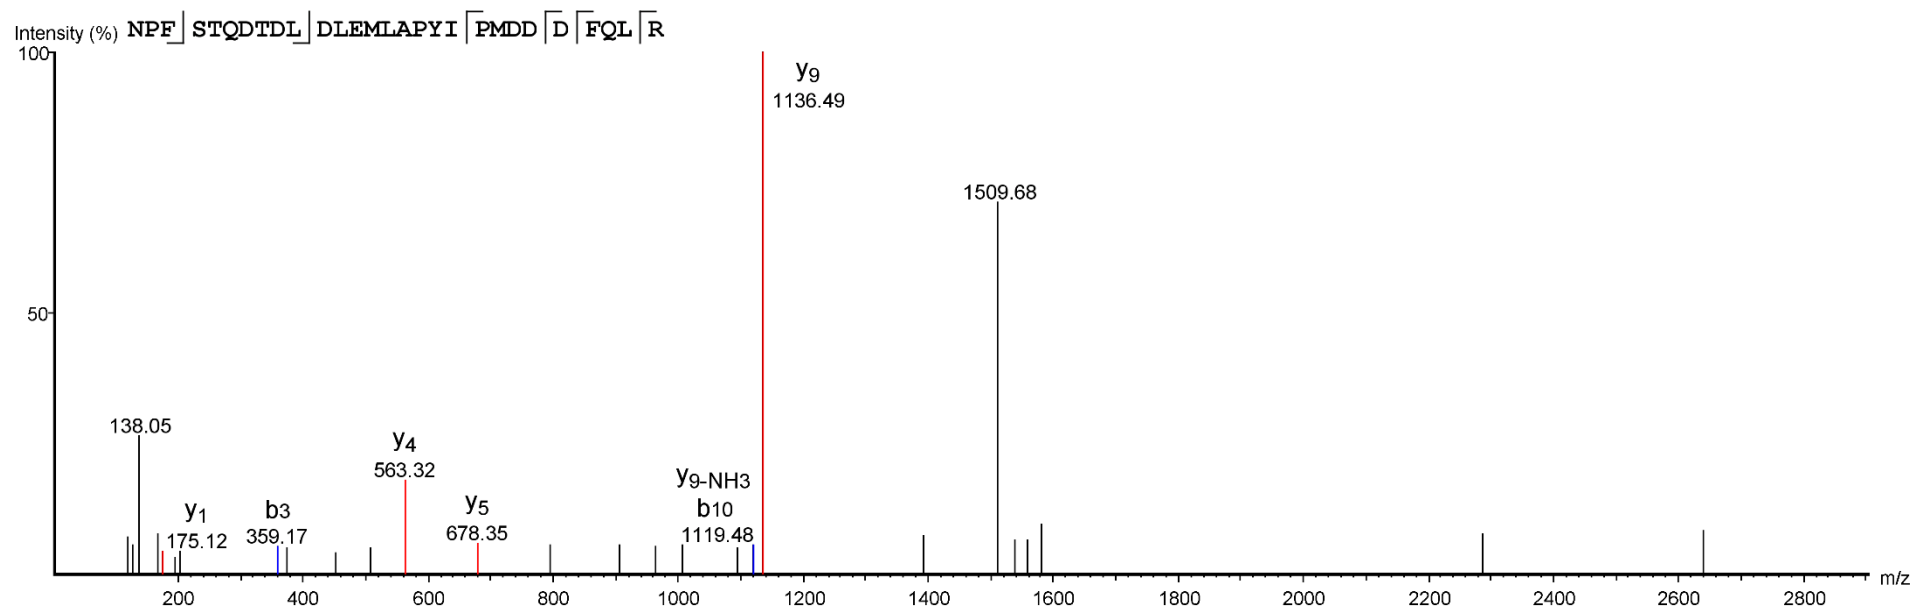

YMT72

Scan #26938

A-002: HIF1A<sub>(548-575)</sub>: NPFSTQD<sup>1</sup>TDL<sup>2</sup>dLEMLA<sup>3</sup> PYI<sup>4</sup> PMD<sup>5</sup> D<sup>6</sup> D<sup>7</sup> FQL<sup>8</sup> R

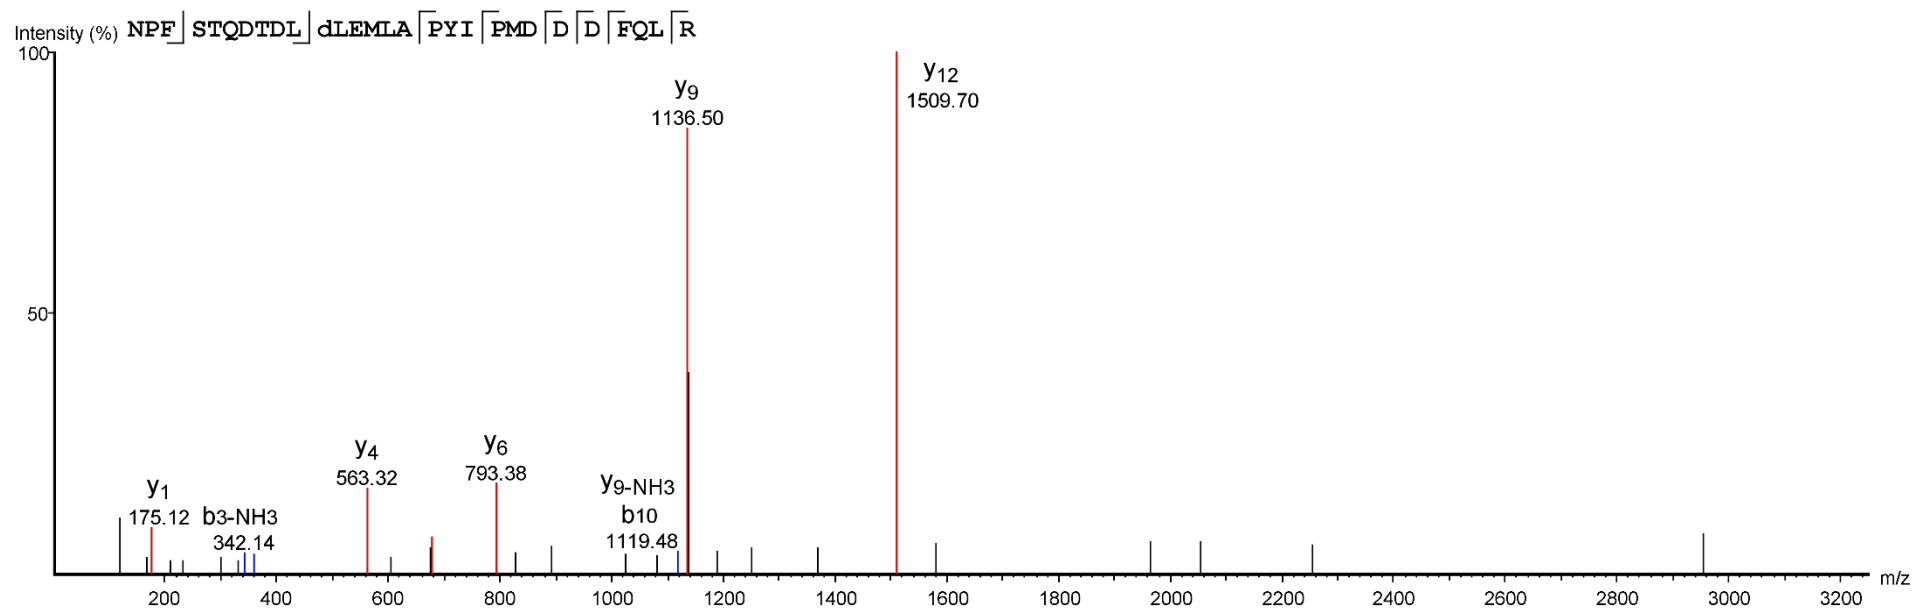

YMT71

Scan #25218

A-003: HIF1A<sub>(548-575)</sub>: NPFSTQDSDLLEM(+15.99)LPYIPMDDDFQLR

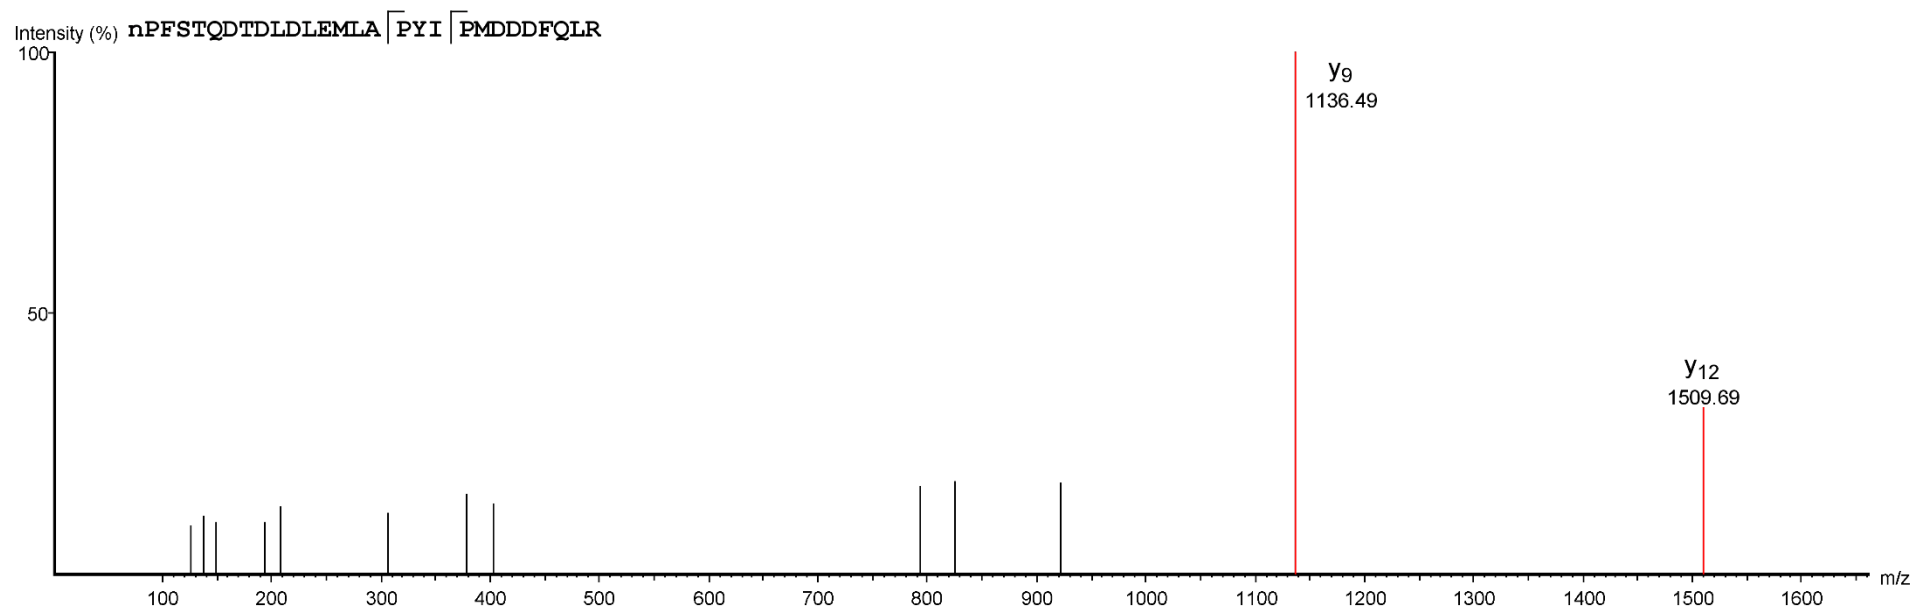

YMT72

Scan #25965

A-004: HIF1A<sub>(548-575)</sub>: NPFSTQD<sup>15</sup>TDL<sup>16</sup>DLEMLAP<sup>17</sup>(+15.99)YIPMDDDFQLR

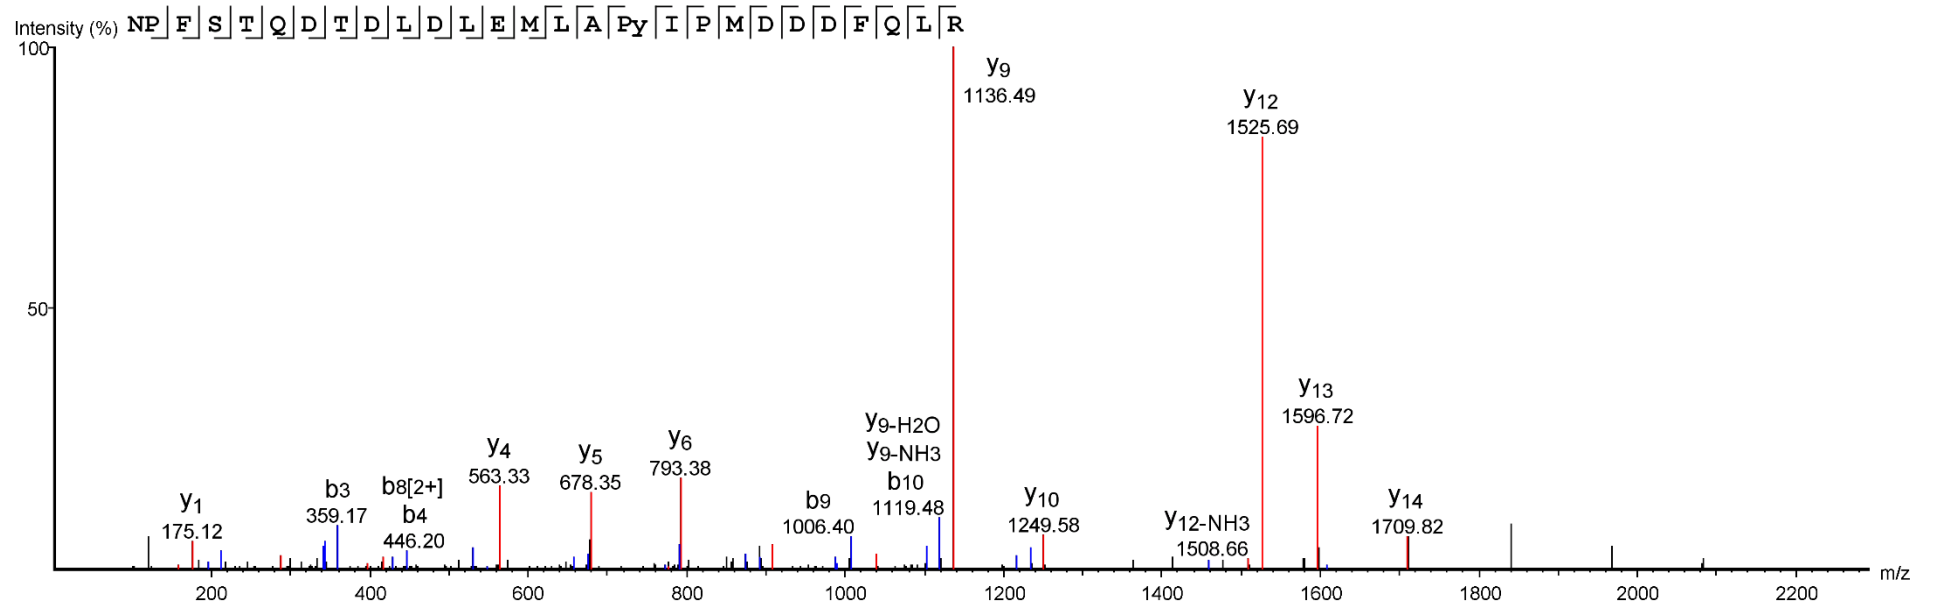

YMT72

Scan #26918

A-005: HIF1A<sub>(548-575)</sub>: NPFSTQD TLDLEMLA P YIPM(+15.99) DDDFQLR

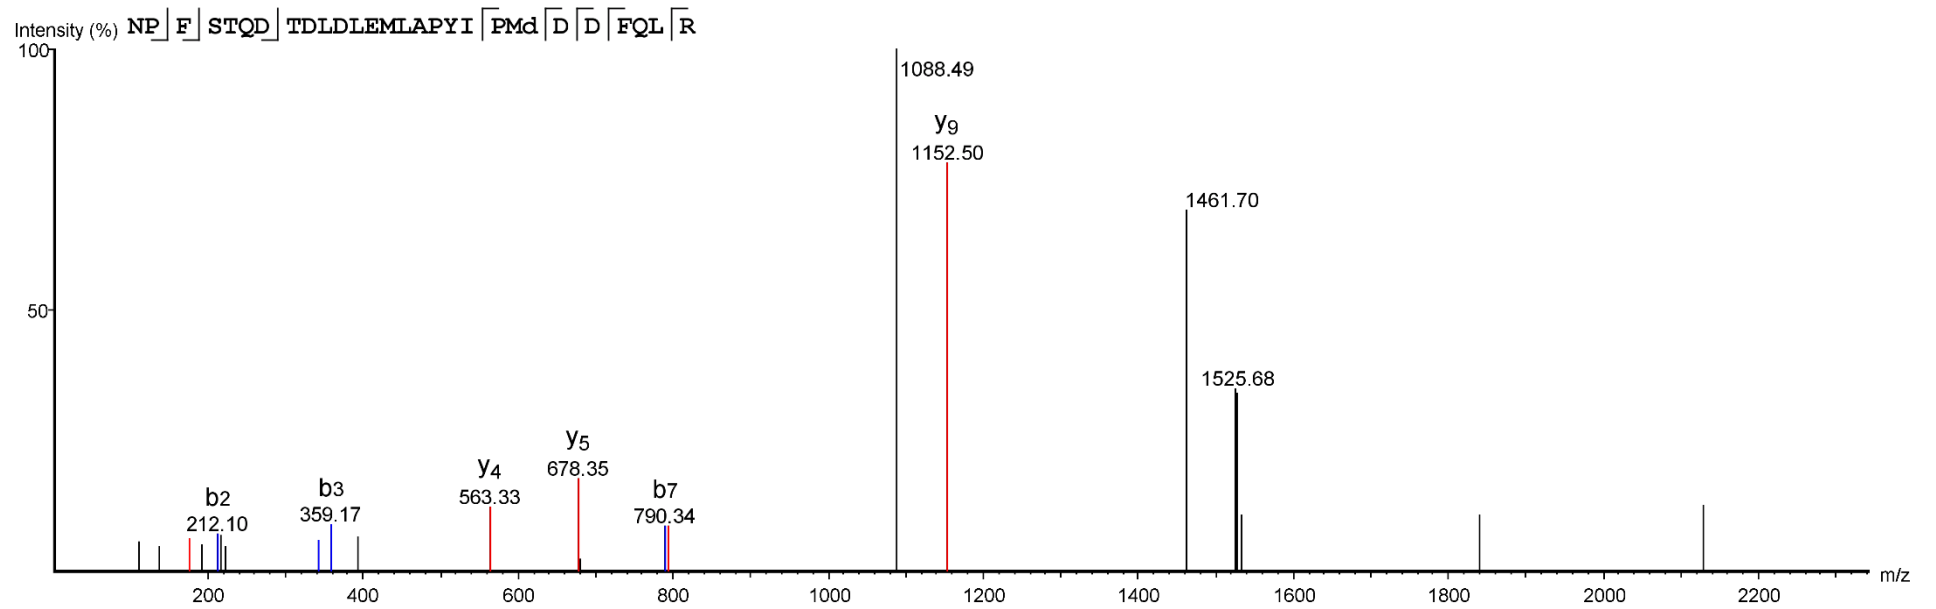

YMT71

Scan #25577

A-006: HIF1A<sub>(548-575)</sub>: NPFSTQDLDLEM(+15.99)LAP(+15.99)YIPMDDDFQLR

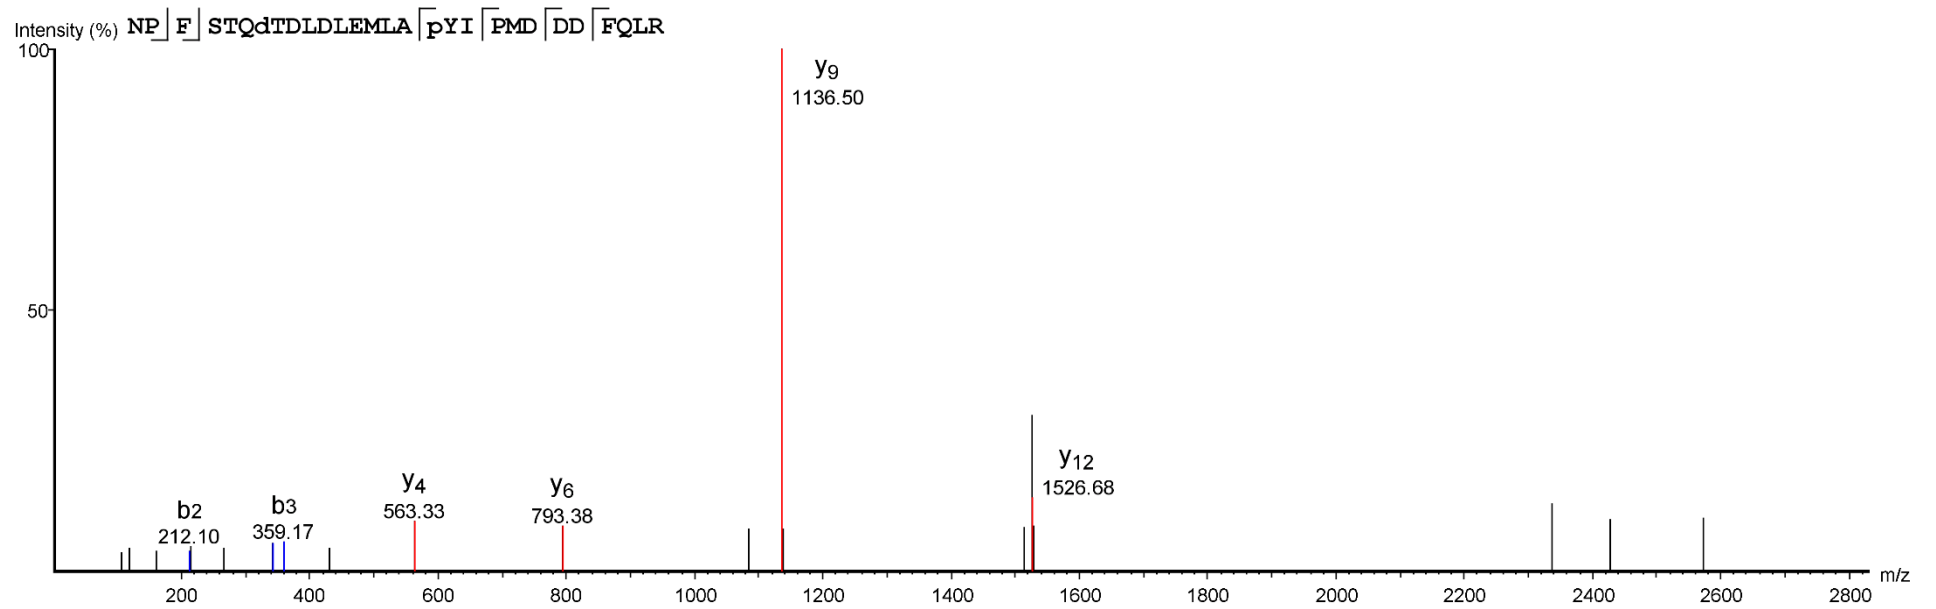

YMT71

Scan #24967

A-007: HIF1A<sub>(548-575)</sub>: NPFSTQDSDLLEM(+15.99)LAP(+15.99)YIPMDDDFQLR

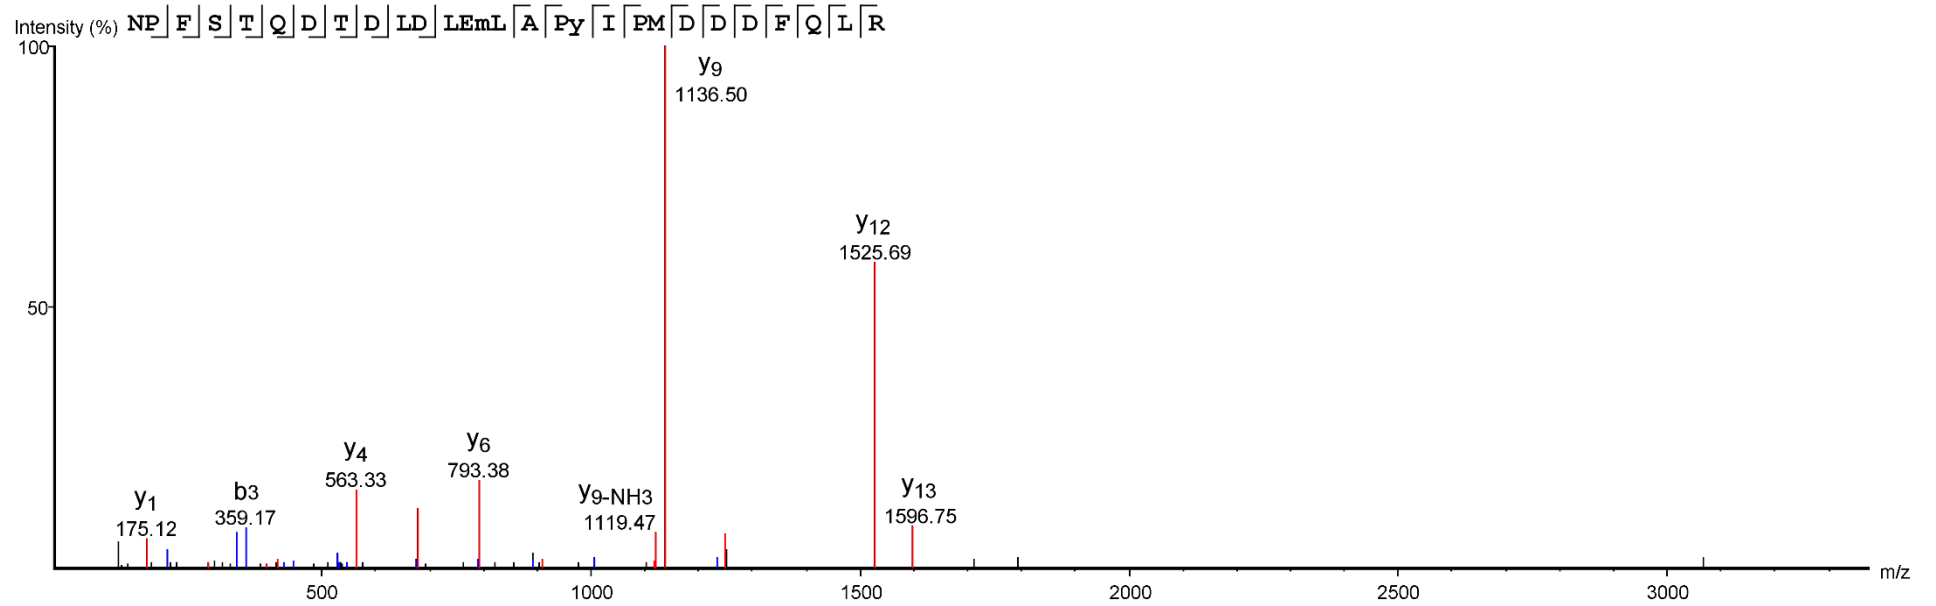

YMT72

Scan #25828



A-008: HIF1A<sub>(548-575)</sub>: NPFSTQDTLDLEM(+15.99)LAPYIPM(+15.99)DDDFQLR

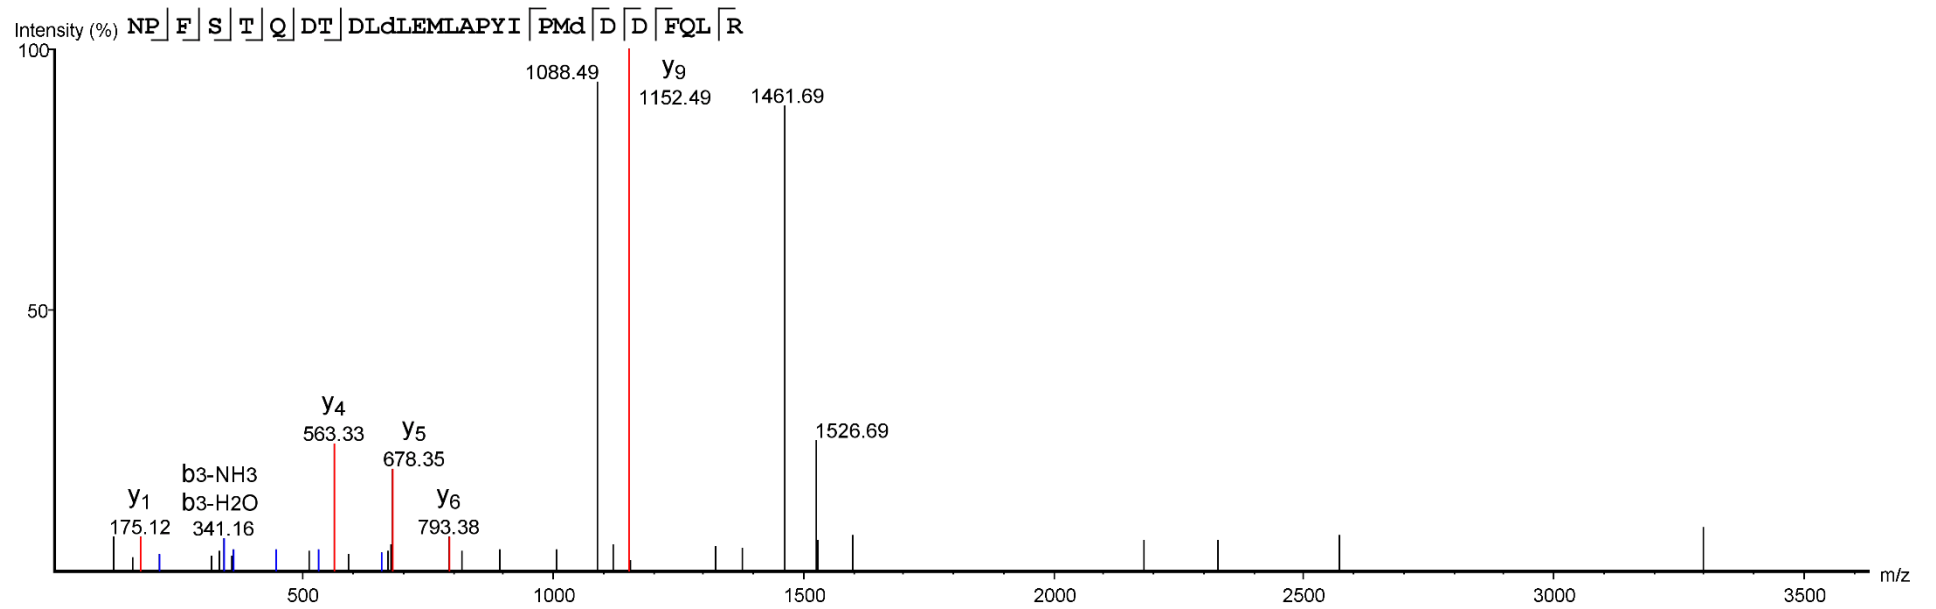

YMT71

Scan #23889

A-009: HIF1A<sub>(548-575)</sub>: NPFSTQDSDLLEMLA(+15.99)YIPM(+15.99)DDDFQLR

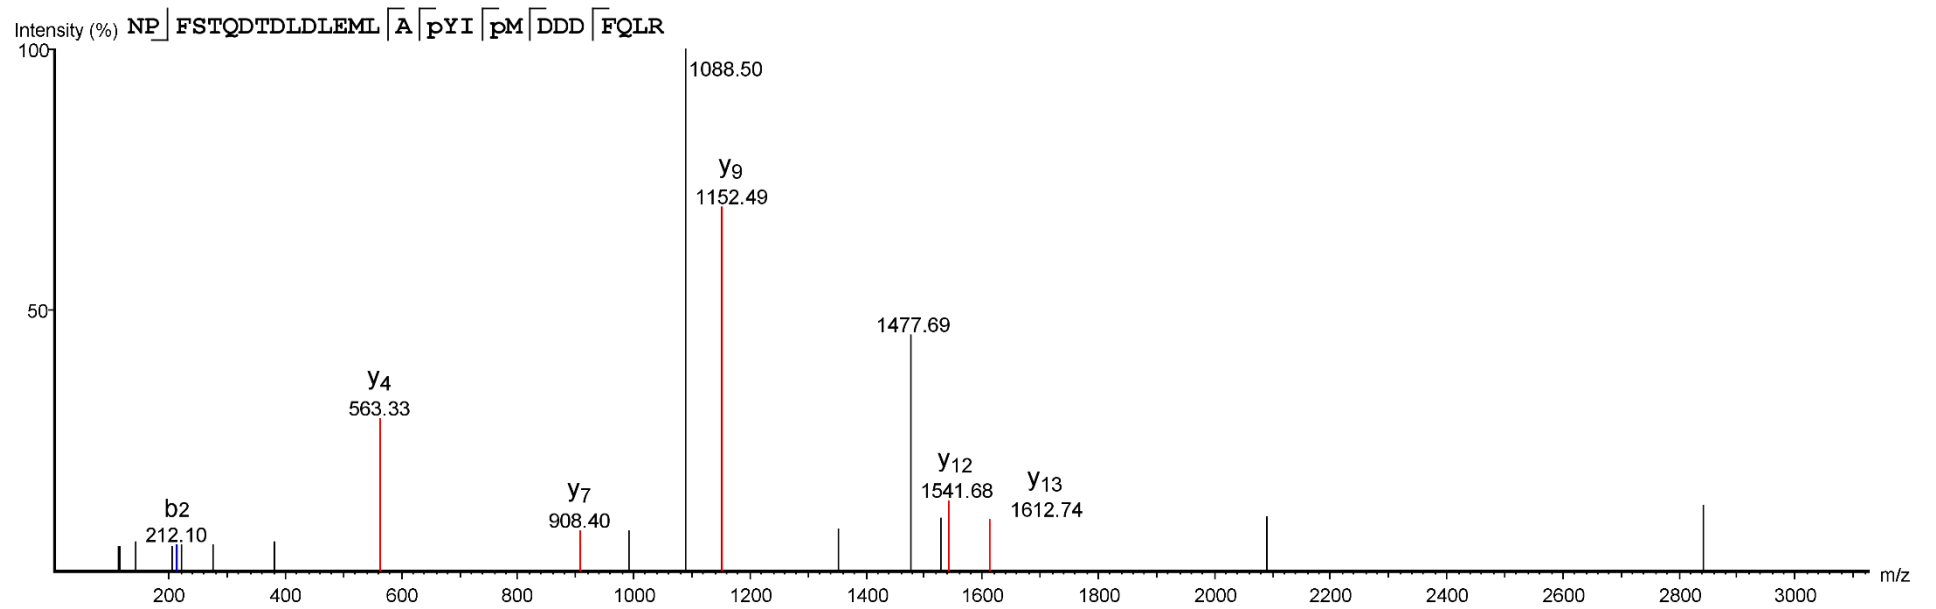

YMT71

Scan #25535

A-010: HIF1A<sub>(548-575)</sub>: NPFSTQDSDLLEMLAP(+15.99)YIPM(+15.99)DDDFQLR

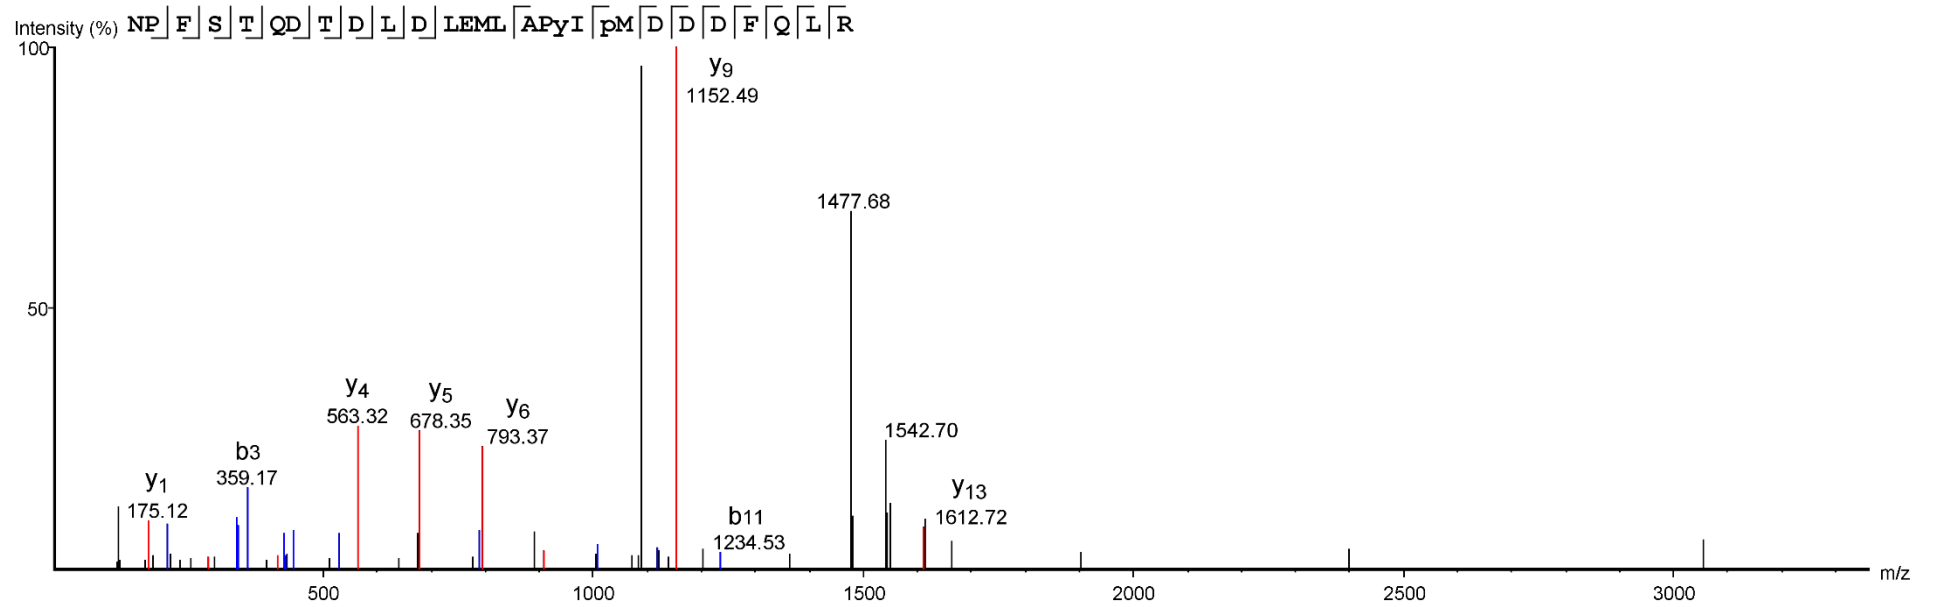

YMT72

Scan #26435

A-011: HIF1A<sub>(548-575)</sub>: NPFSTQDLDLEM(+15.99)LAP(+15.99)YIPM(+15.99)DDDFQLR

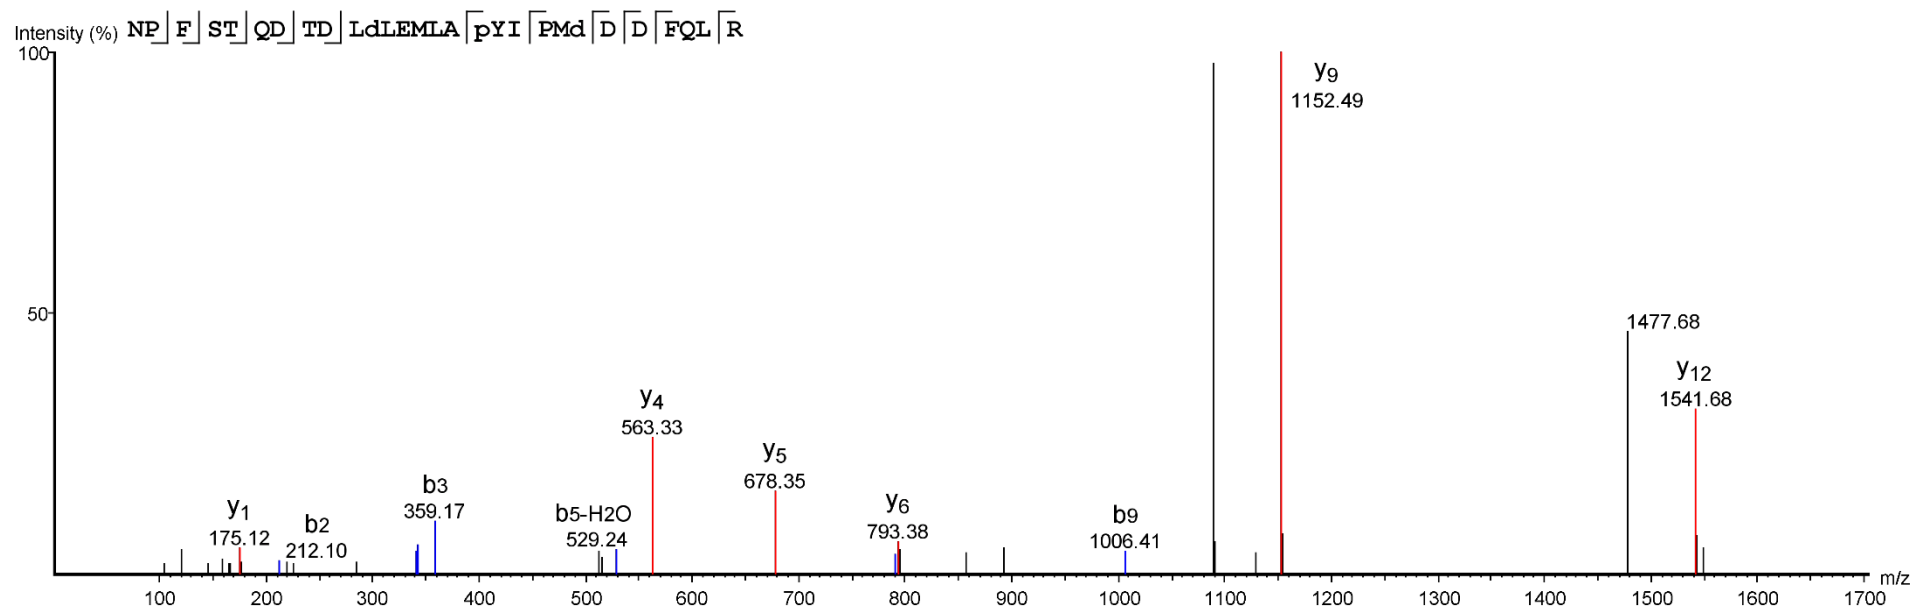

YMT71

Scan #23778

A-012: HIF1A<sub>(548-575)</sub>: NPFSTQD**TDL**LEM(+15.99)**LAP(+15.99)**YIPM(+15.99)DDDFQLR

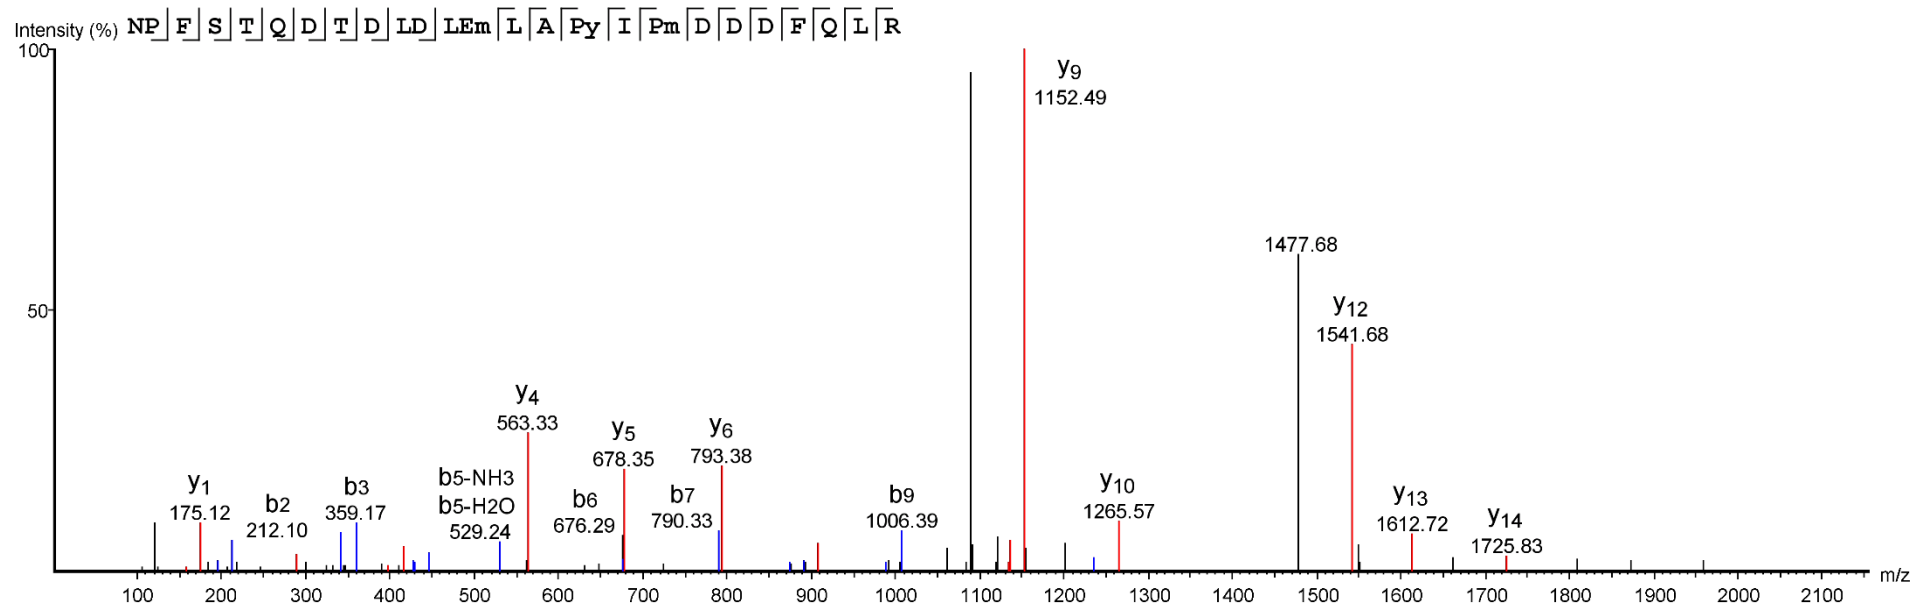

YMT72

Scan #24531

A-013: HIF1A\*<sub>(548-575)</sub>: NPFSTQDSDLLEALAPYIPADDDFQLR

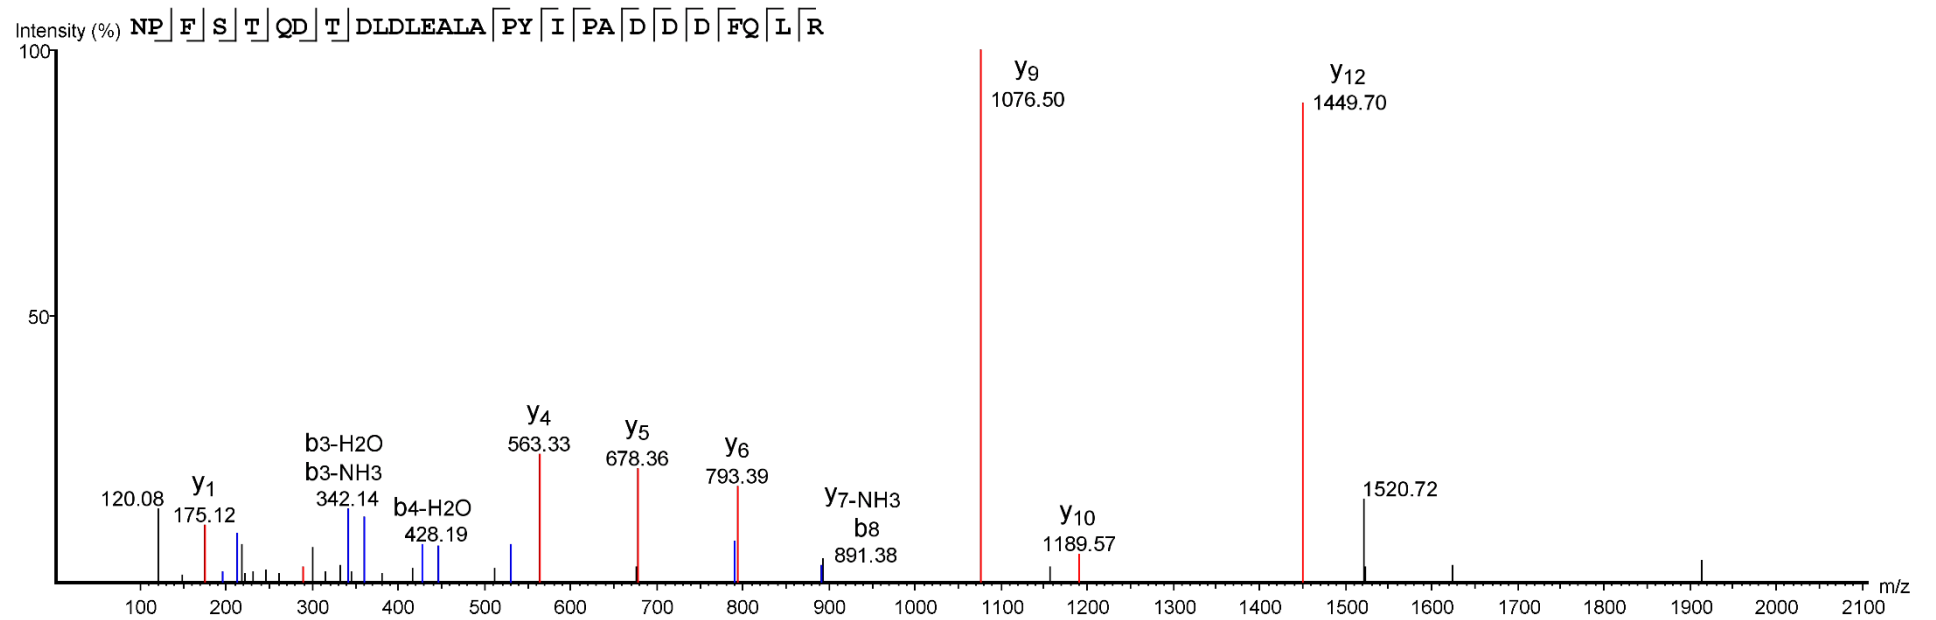

YMT57

Scan #25762

A-014: HIF1A\*<sub>(548-575)</sub>: NPFSTQDSDLLEALAPYIPADDDFQLR

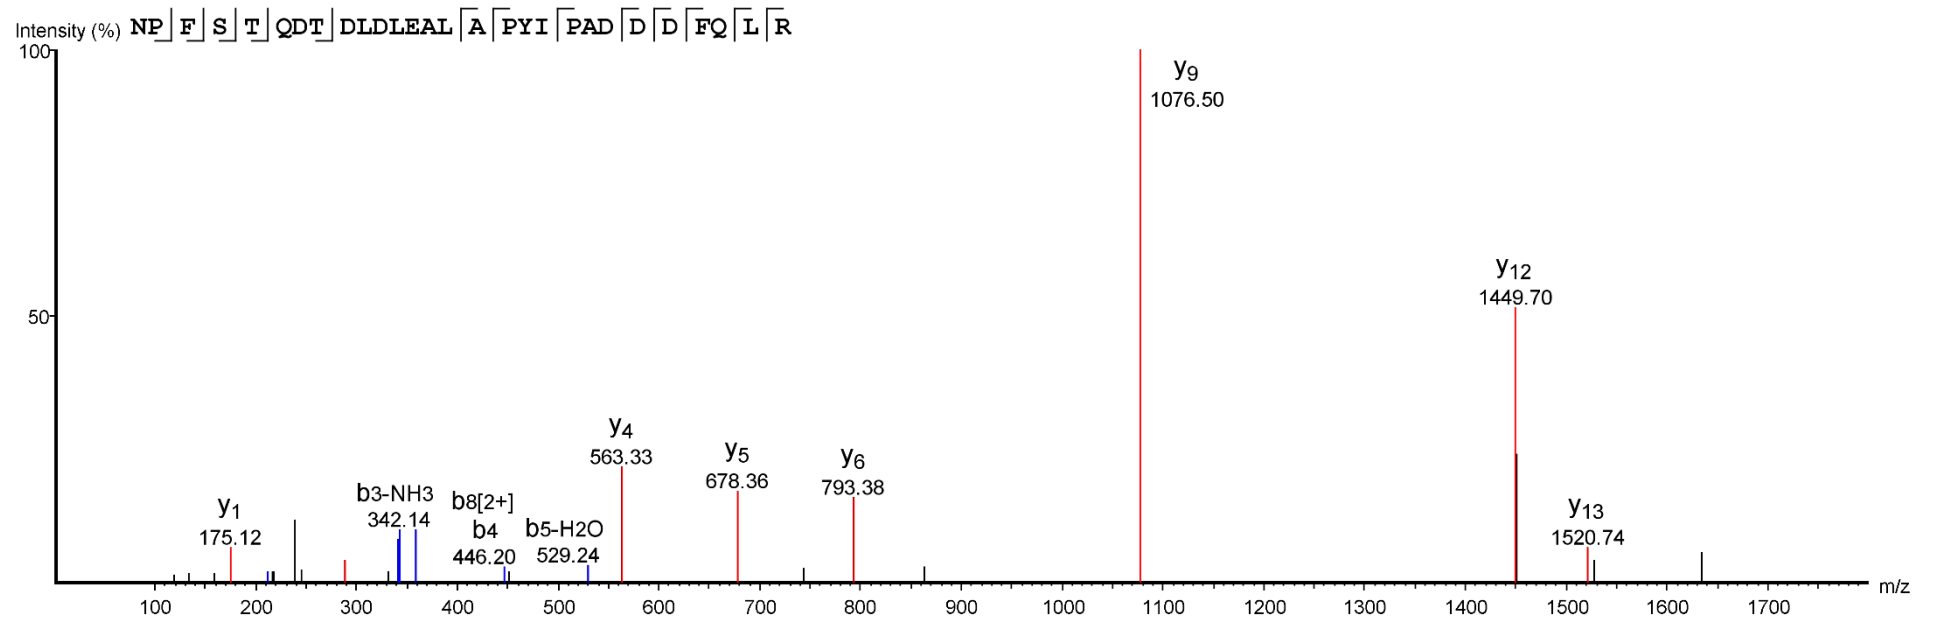

YMT58

Scan #27179

A-015: HIF1A\*<sub>(548-575)</sub>: NPFSTQD**T**LDLEALAP(+15.99)YIPADDD**F**QLR

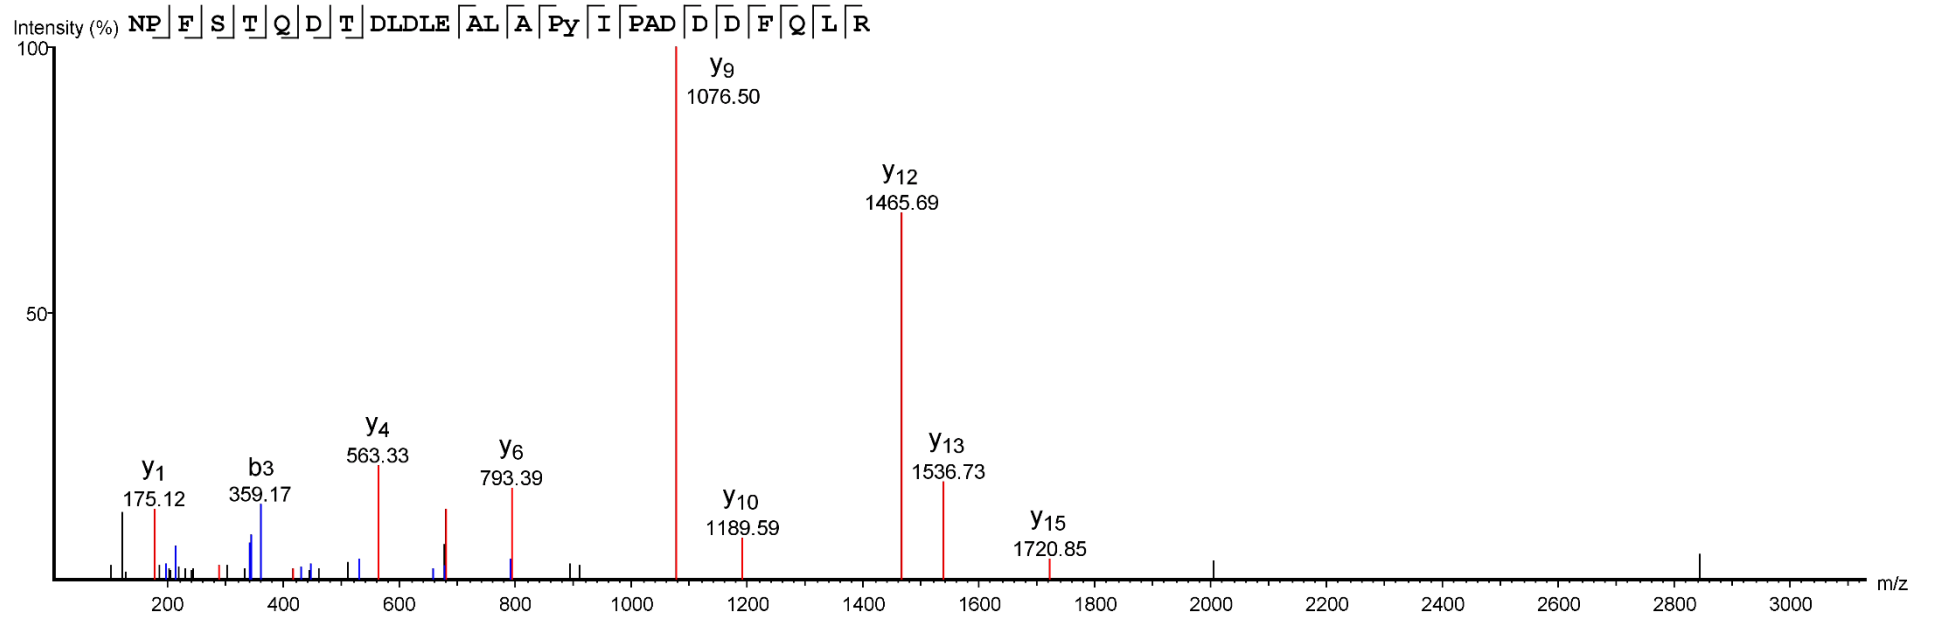

YMT57

Scan #25747



A-016: HIF1A\*<sub>(548-575)</sub>: NPFSTQD**T**LDLEALAP(+15.99)YIPADDD**F**QLR

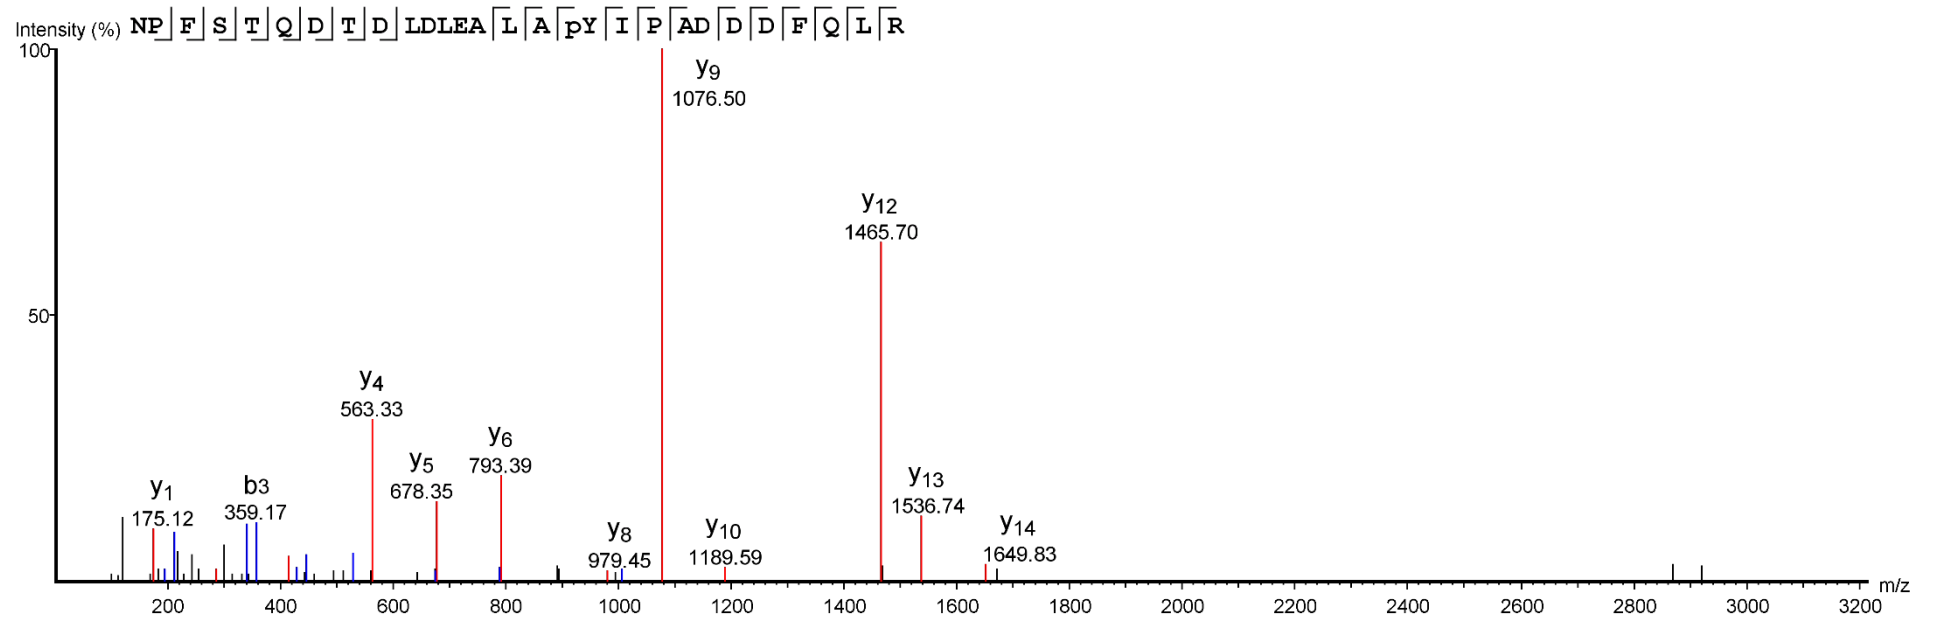

YMT58

Scan #27163

A-017: HIF1A\*<sub>(392-403)</sub>: KEPDALTLLAPA

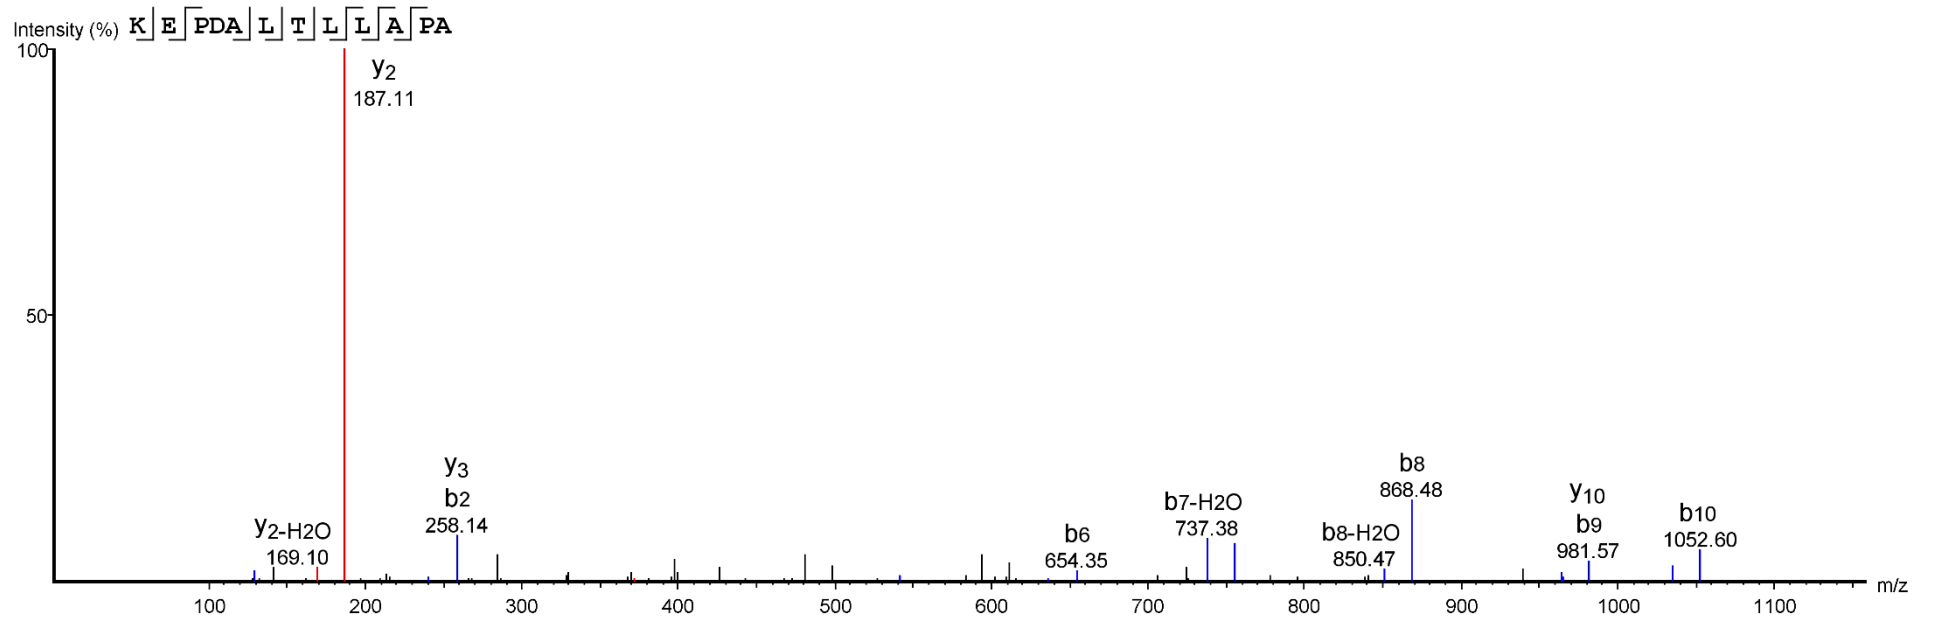

YMT57

Scan #18017

A-018: HIF1A\*<sub>(392-403)</sub>: KEPDALTLLAPA

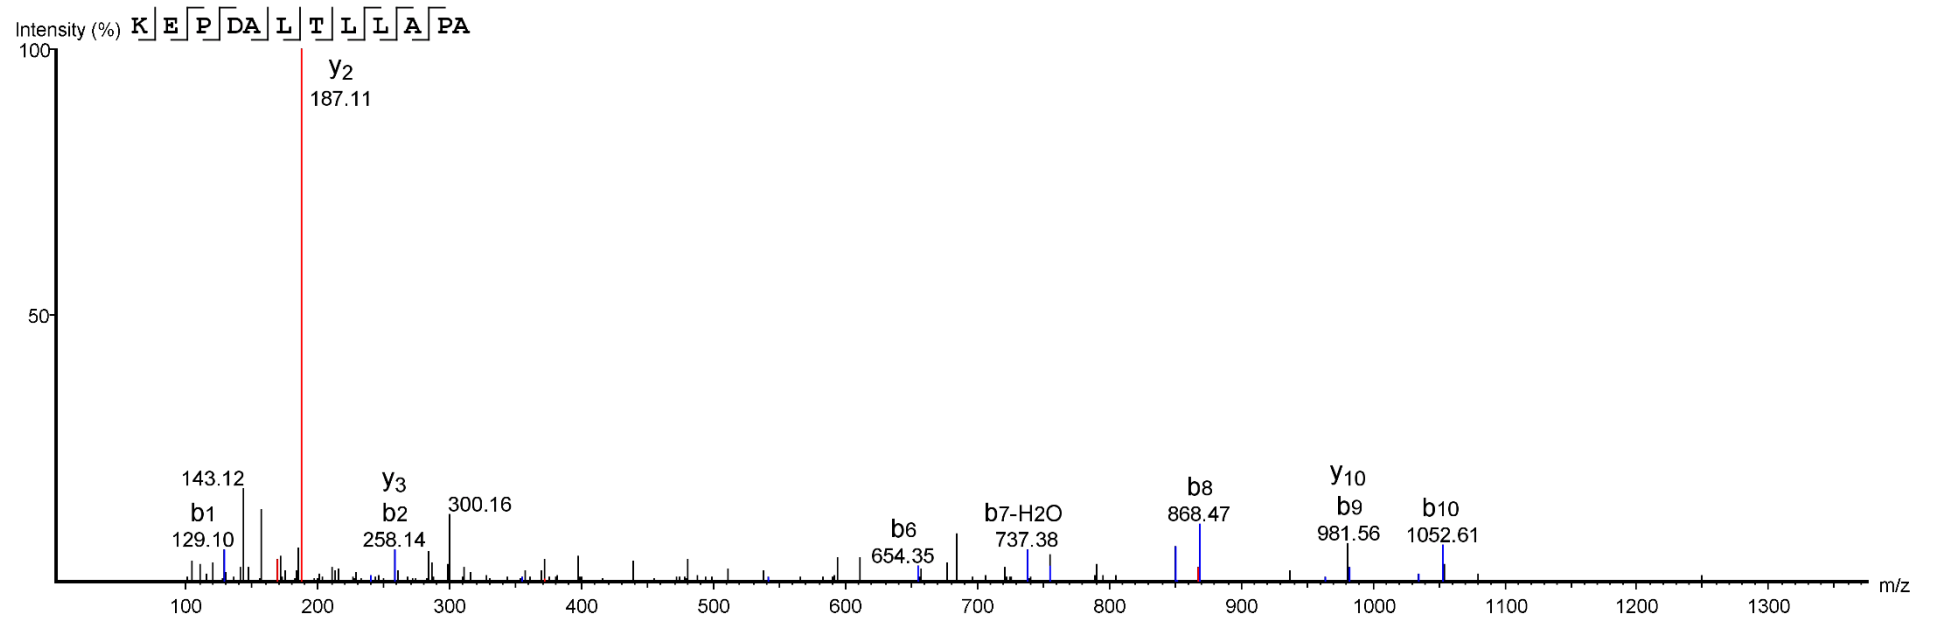

YMT58

Scan #19119

A-019: HIF1A\*<sub>(392-403)</sub>: KEPDALTLLAP(+15.99)A

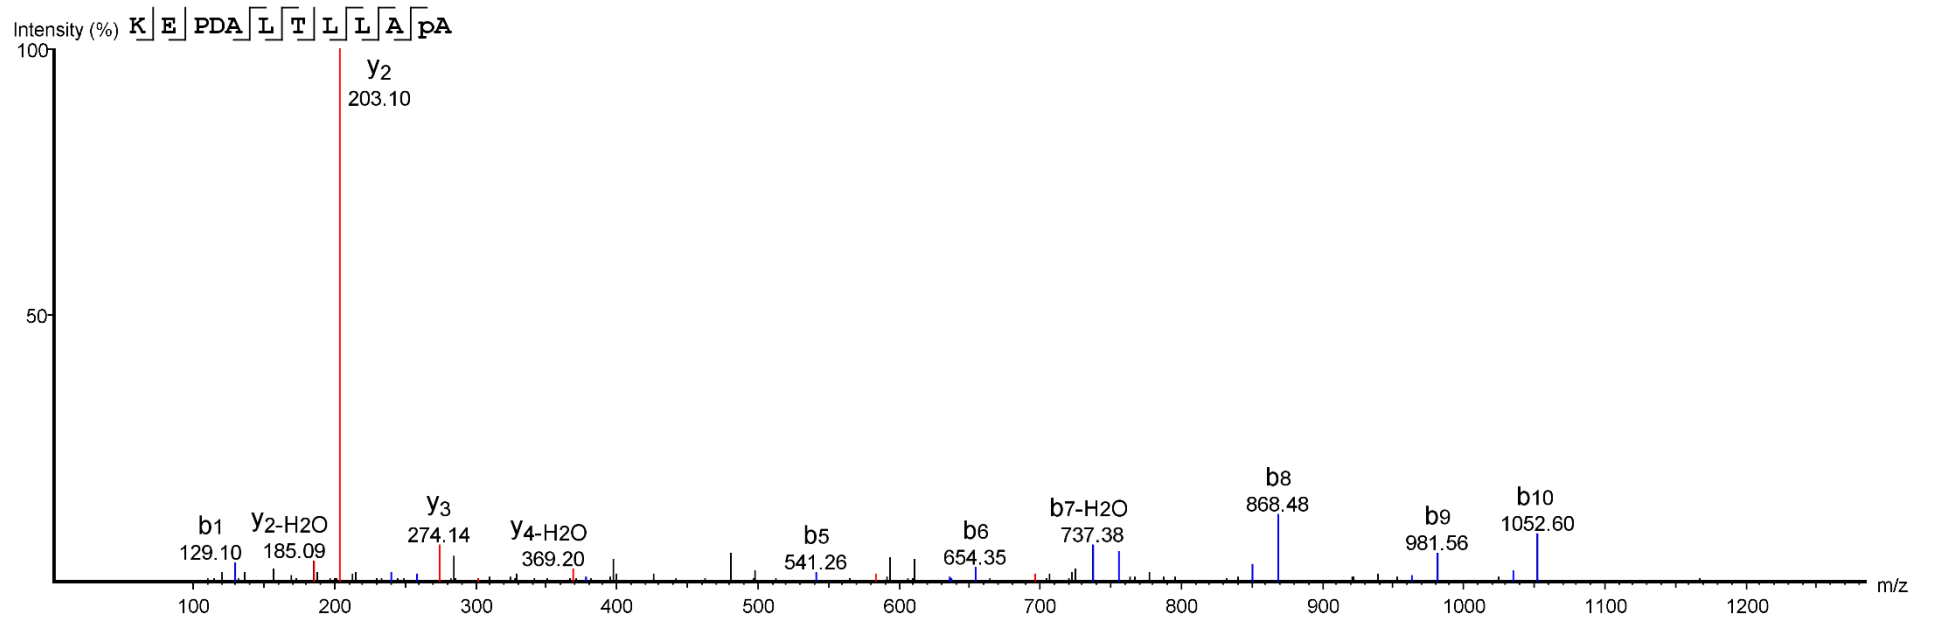

YMT57

Scan #16535

A-020: HIF1A\*<sub>(392-403)</sub>: KEPDALTLLAP(+15.99)A

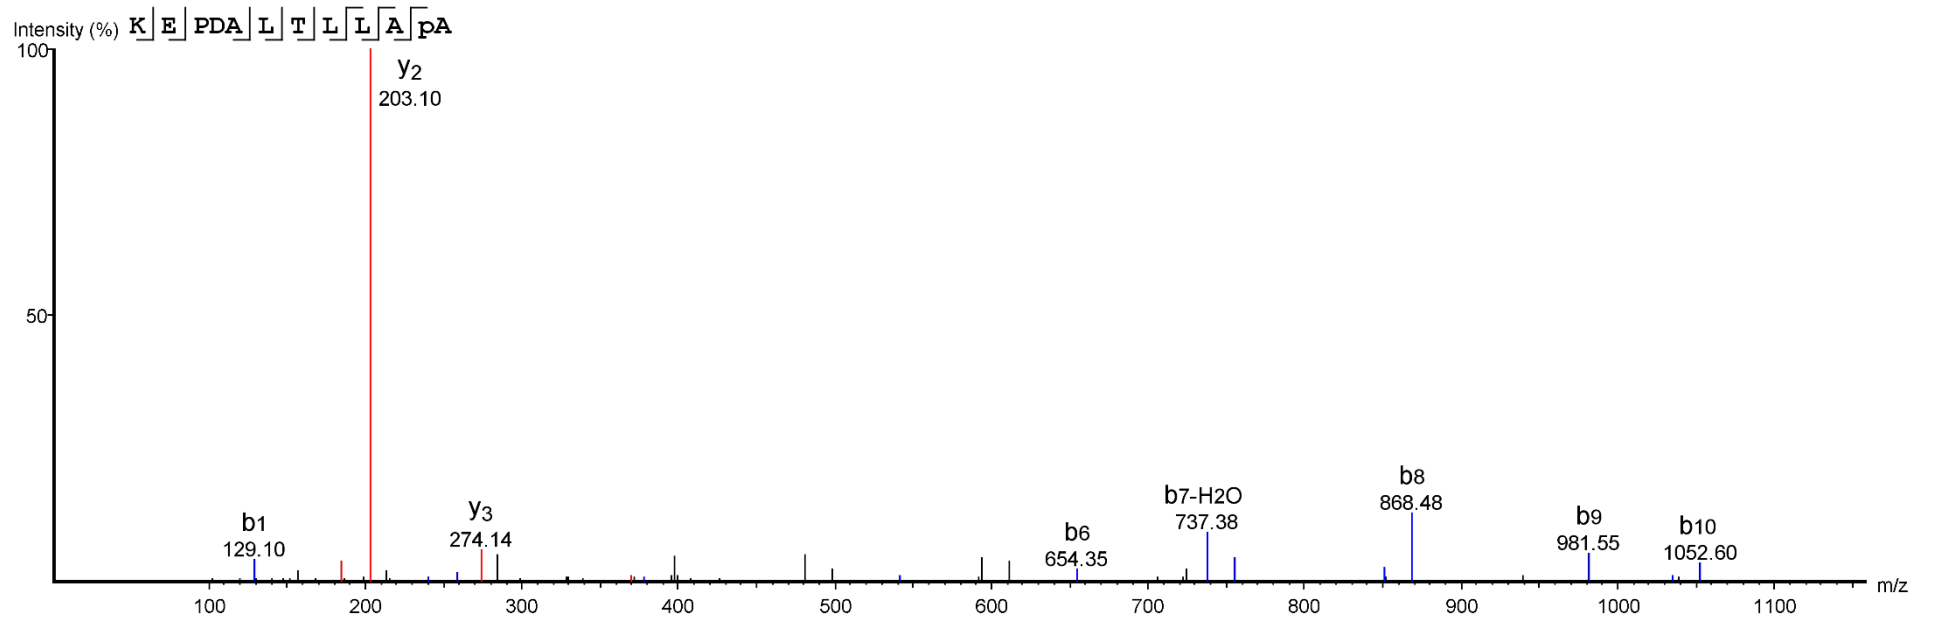

YMT58

Scan #17486

A-021: HIF1A\*<sub>(548-575)</sub>: NPFSTQDSDLLEALAPYIPADDDDFQLR

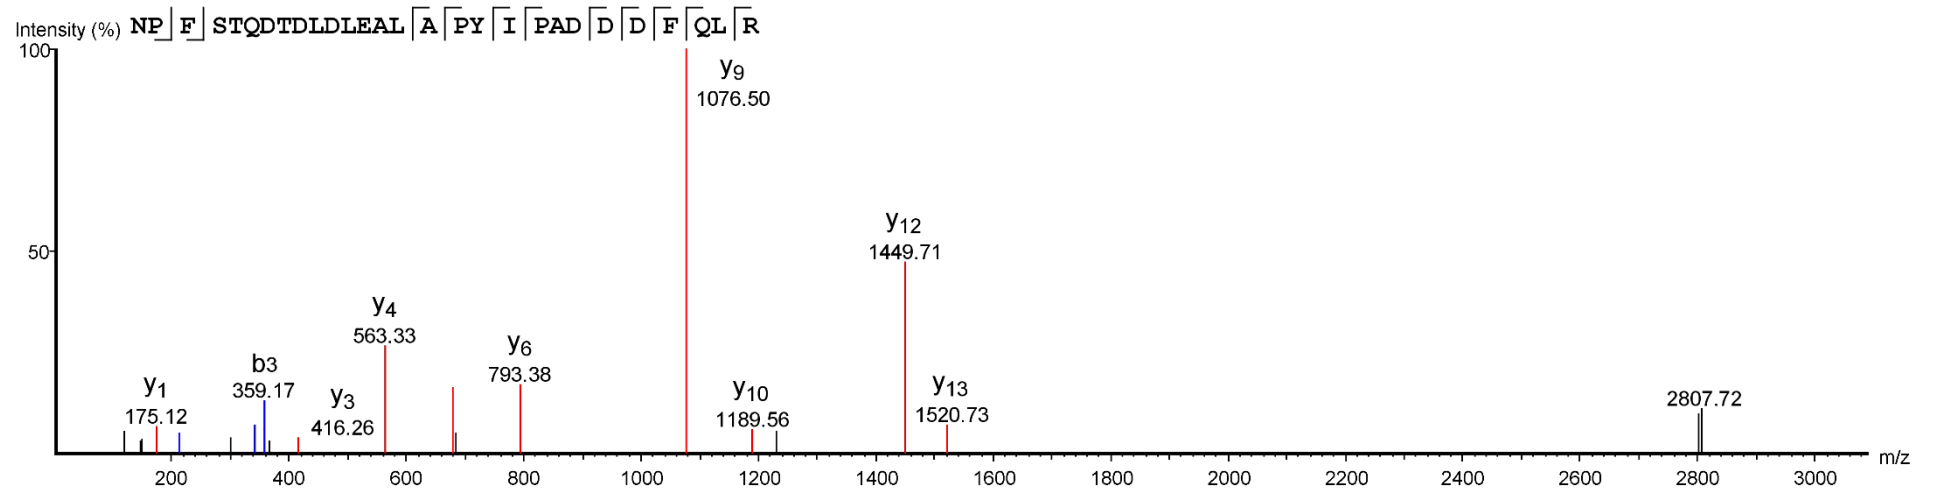

YMT25

Scan #26114

A-022: HIF1A\*<sub>(548-575)</sub>: NPFSTQDTLDLEALAPYIPADDDDFQLR

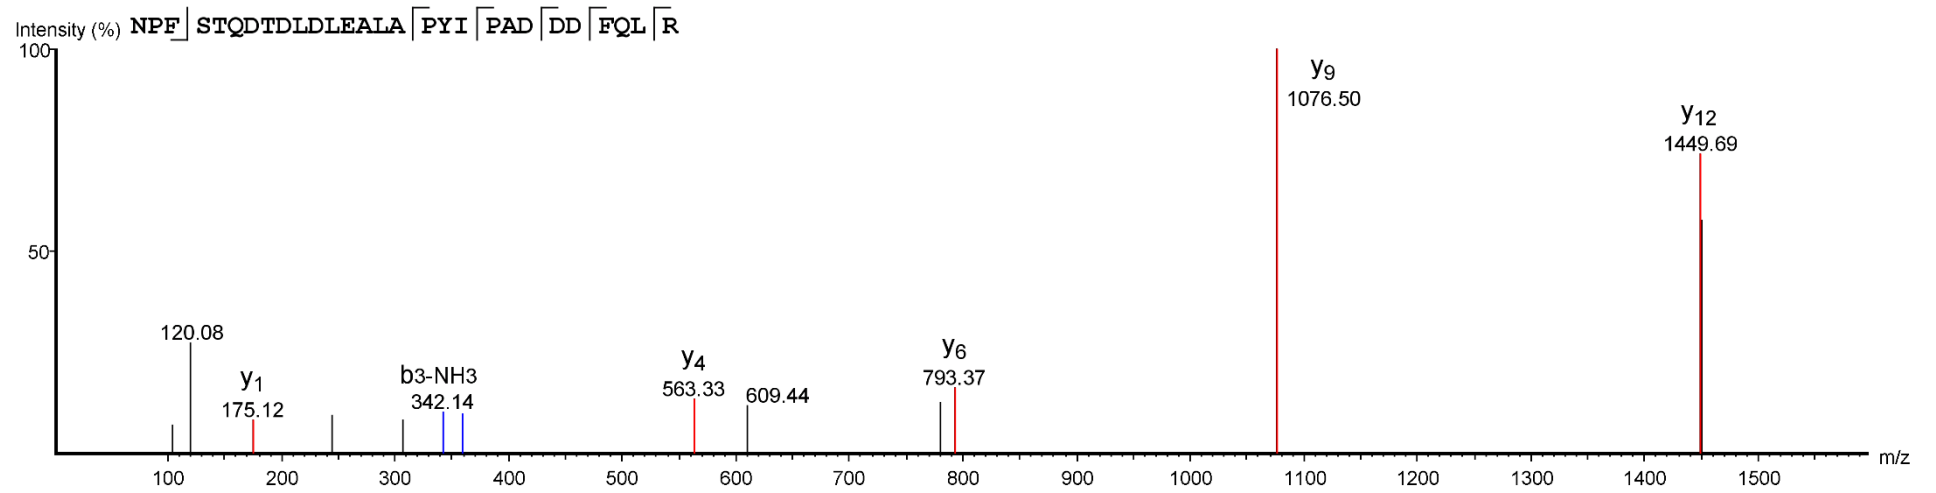

YMT26

Scan #25868

A-023: HIF1A\*<sub>(548-575)</sub>: NPFSTQD**T**DL**D**LEAL**A**P(+15.99)YIPADDD**F**QLR

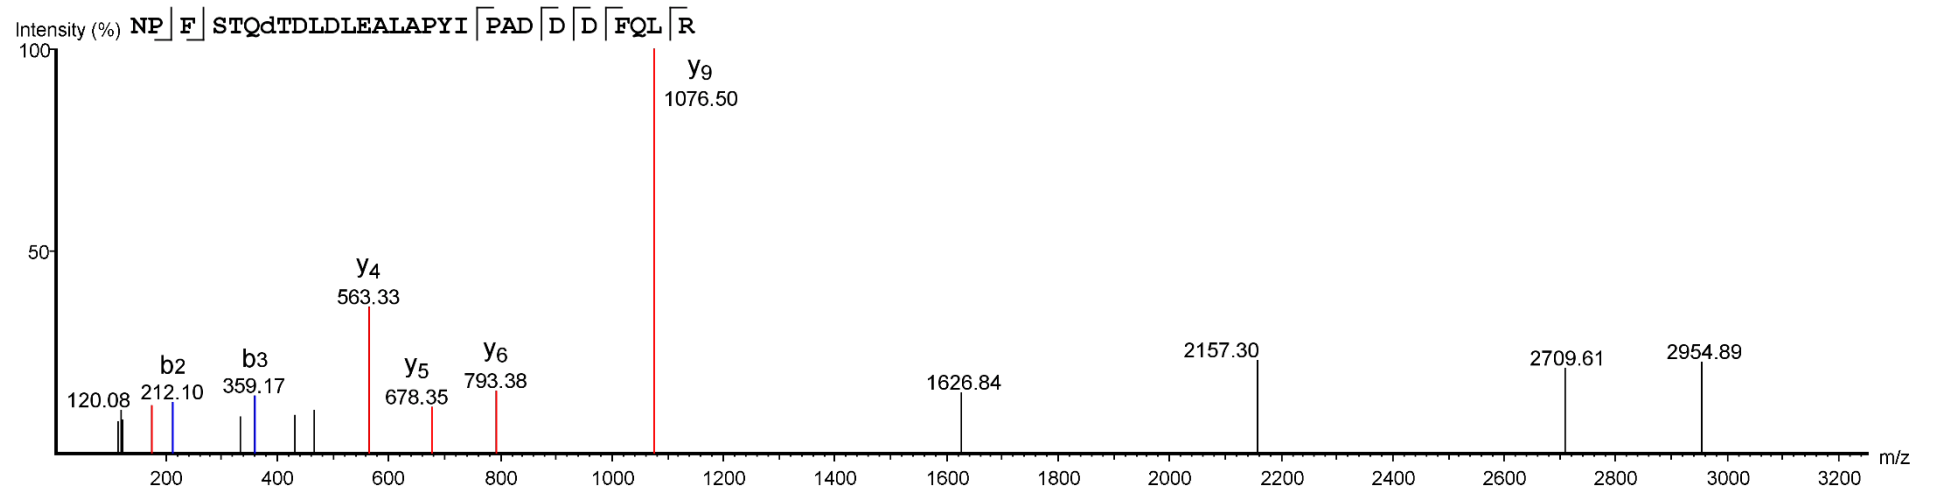

YMT25

Scan #26084



A-024: HIF1A\*<sub>(548-575)</sub>: NPFSTQD**TDL**DLEALAP(+15.99)YIPADDD**F**QLR

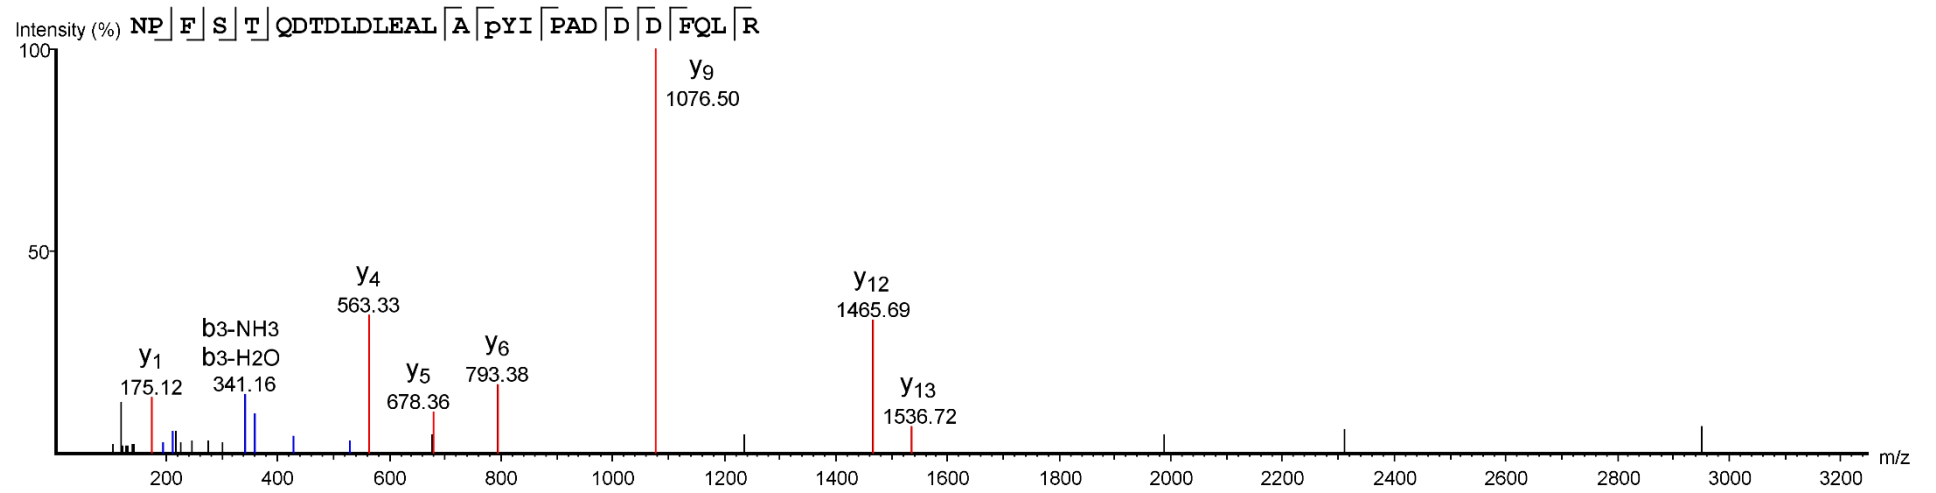

YMT26

Scan #25866

A-025: HIF1A\*<sub>(548-575)</sub>: NPFSTQD**TDL**DLEALAP(+15.99)YIPADDD**F**QLR

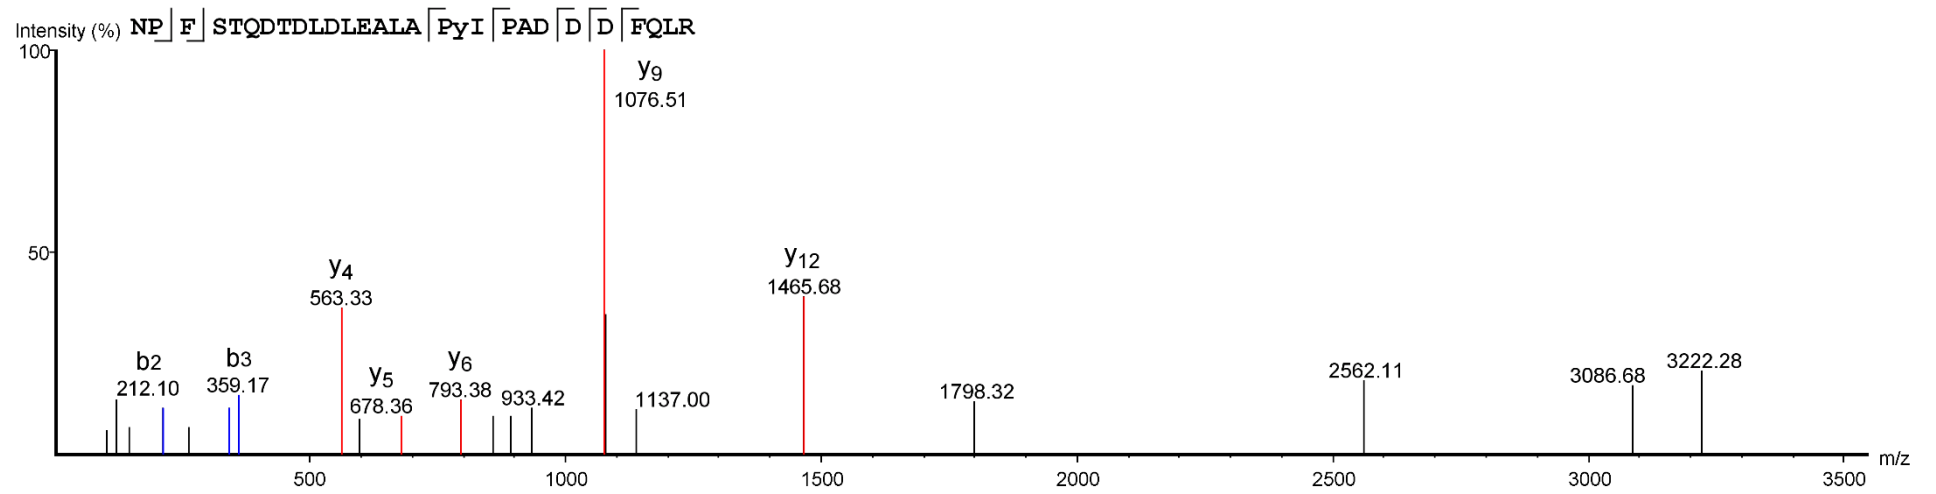

YMT28

Scan #25885

A-026: HIF1A\*<sub>(392-403)</sub>: KEPDALTLLAPA

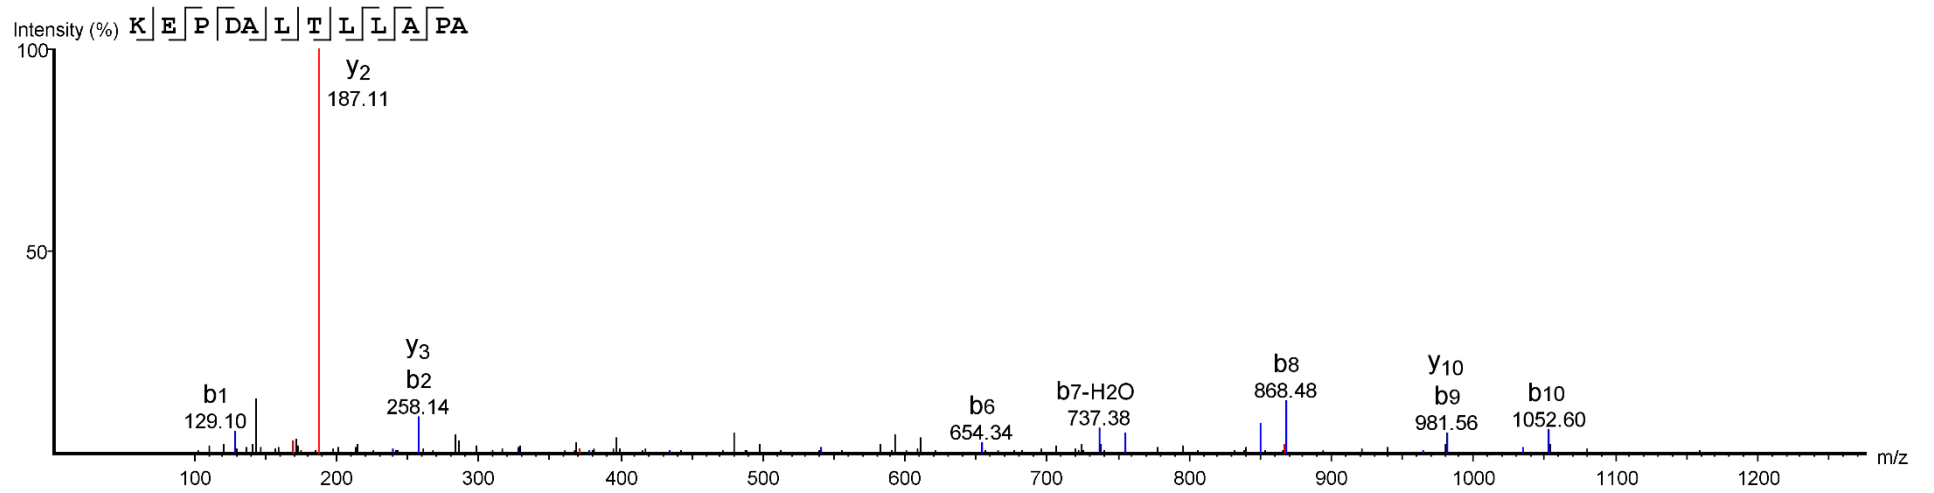

YMT25

Scan #18201

A-027: HIF1A\*<sub>(392-403)</sub>: KEPDALTL<sup>A</sup>PA

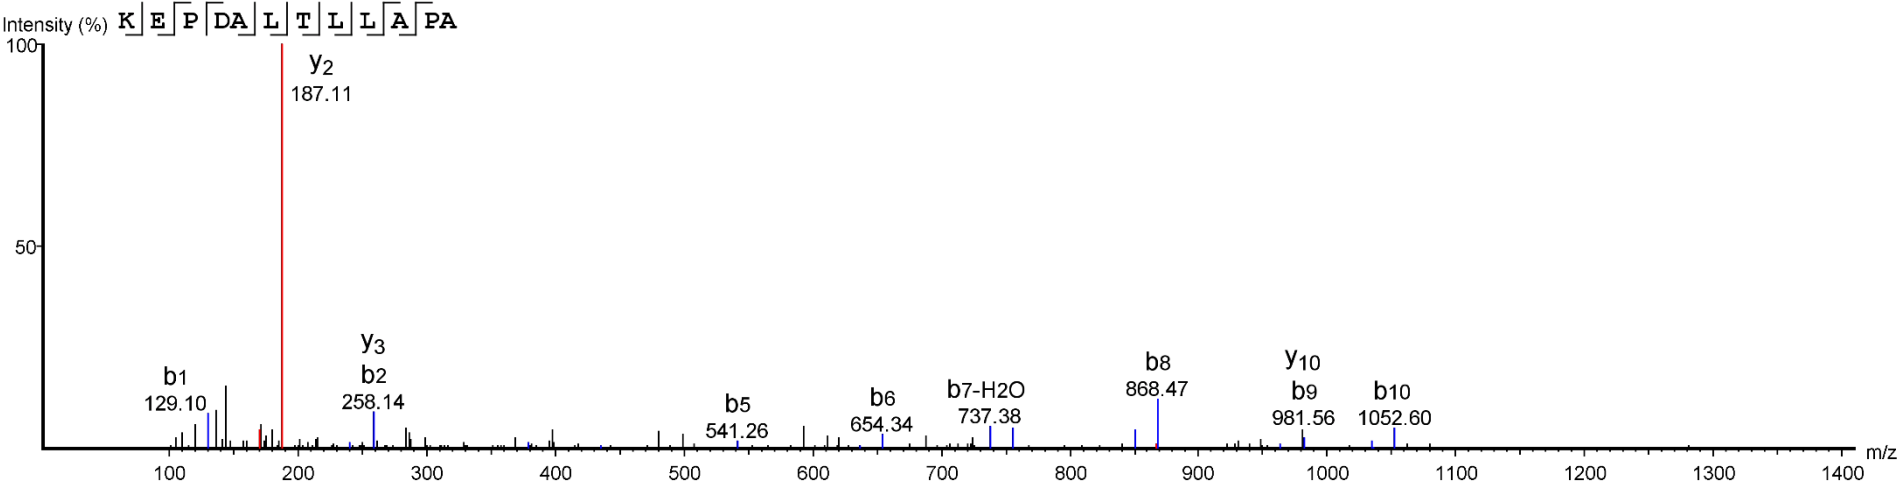

YMT28  
Scan #18017

A-028: HIF1A\*<sub>(392-403)</sub>: KEPDALTL~~L~~AP(+15.99)A

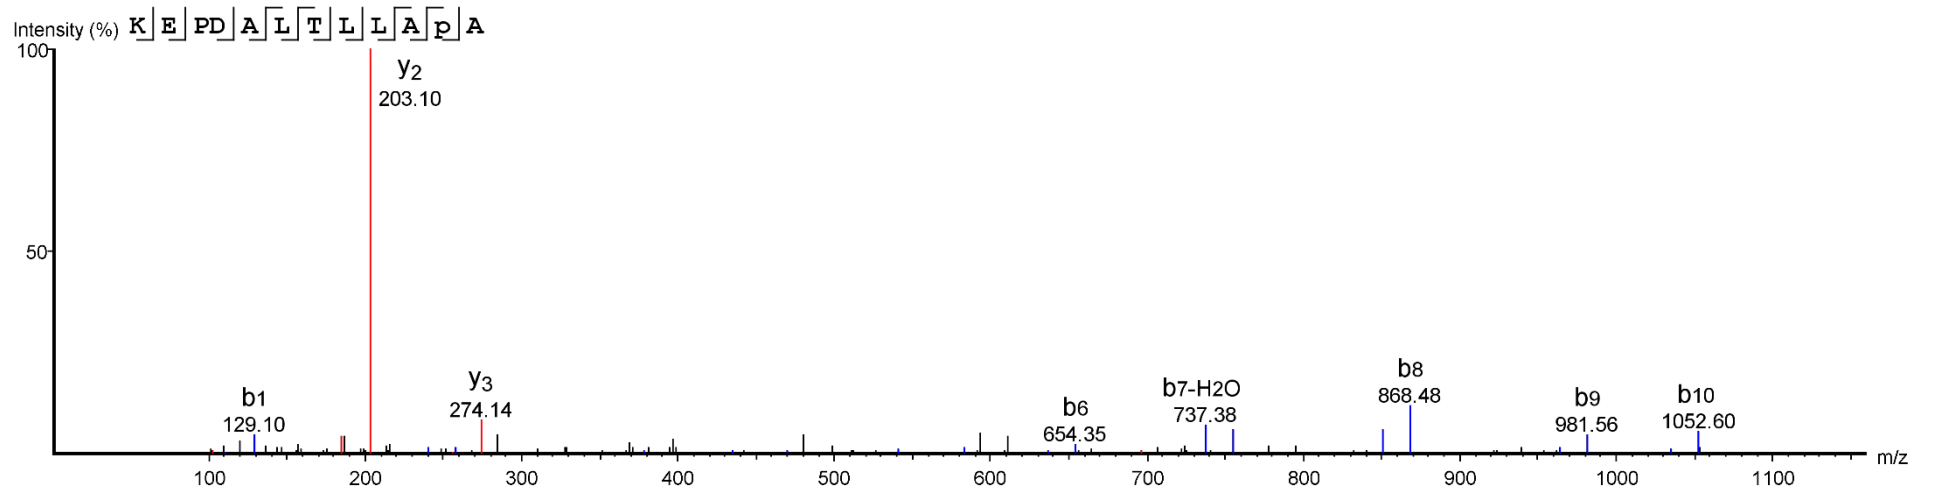

YMT26

Scan #16342

A-029: HIF1A\*<sub>(548-575)</sub>: NPFSTQDTLDLEALAPYIPADDDDFQLR

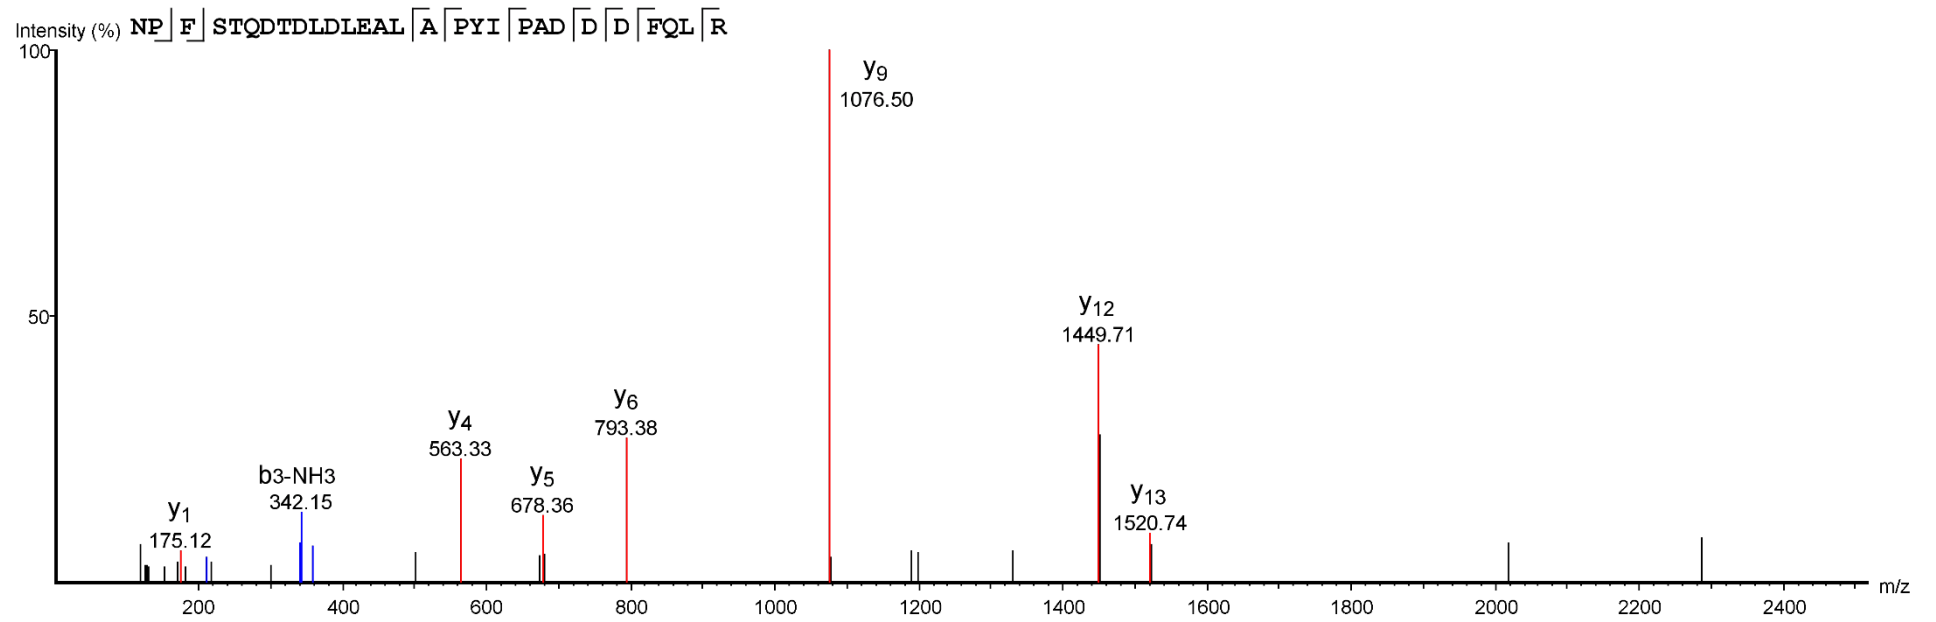

YMT51

Scan #26692

A-030: HIF1A\*<sub>(548-575)</sub>: NPFSTQDSDLLEALAPYIPADDDDFQLR

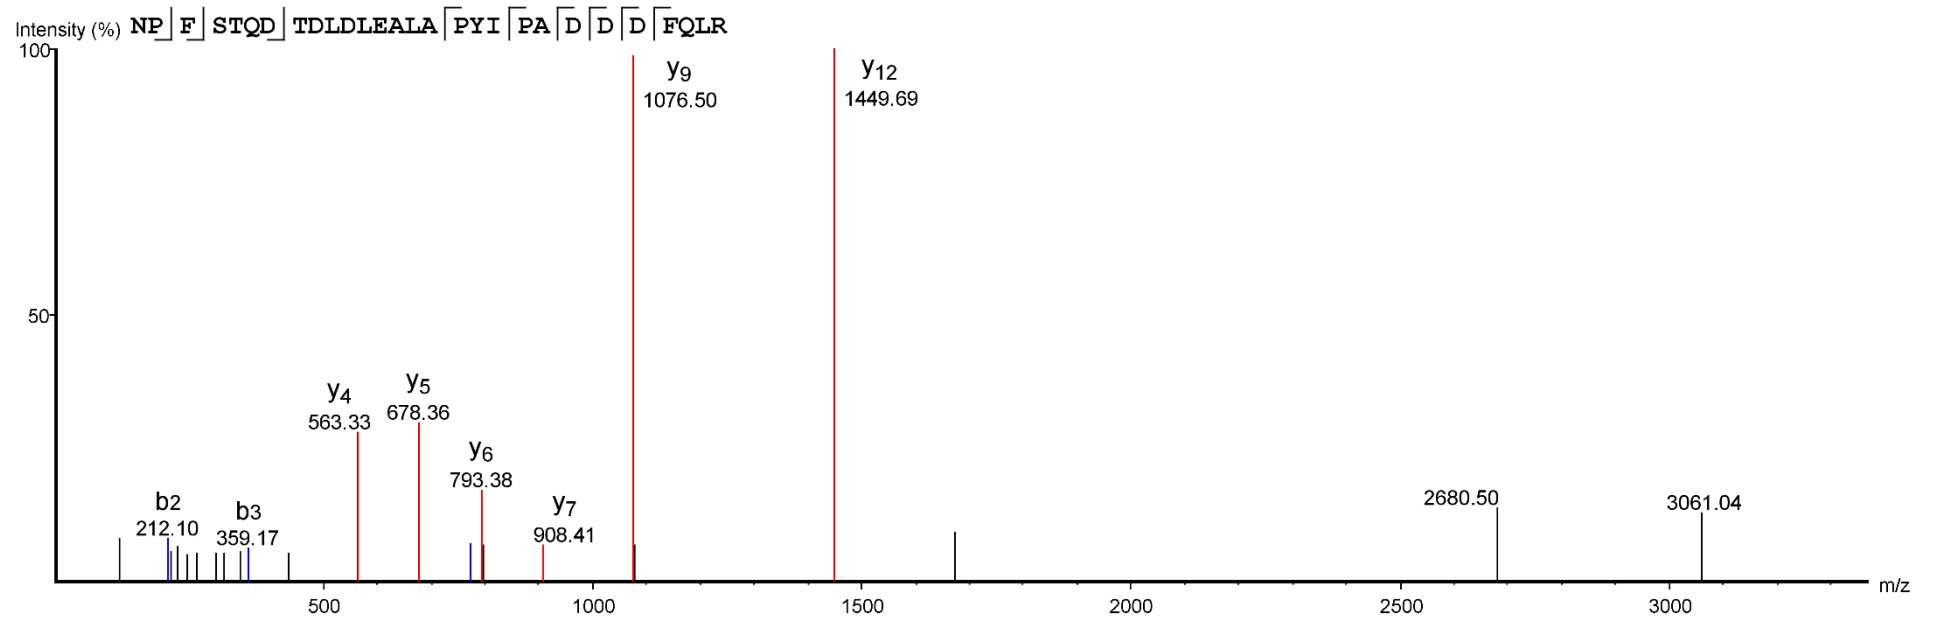

YMT52

Scan #26577

A-031: HIF1A\*<sub>(548-575)</sub>: NPFSTQD**T**LDLEALAP(+15.99)YIPADDDDFQLR

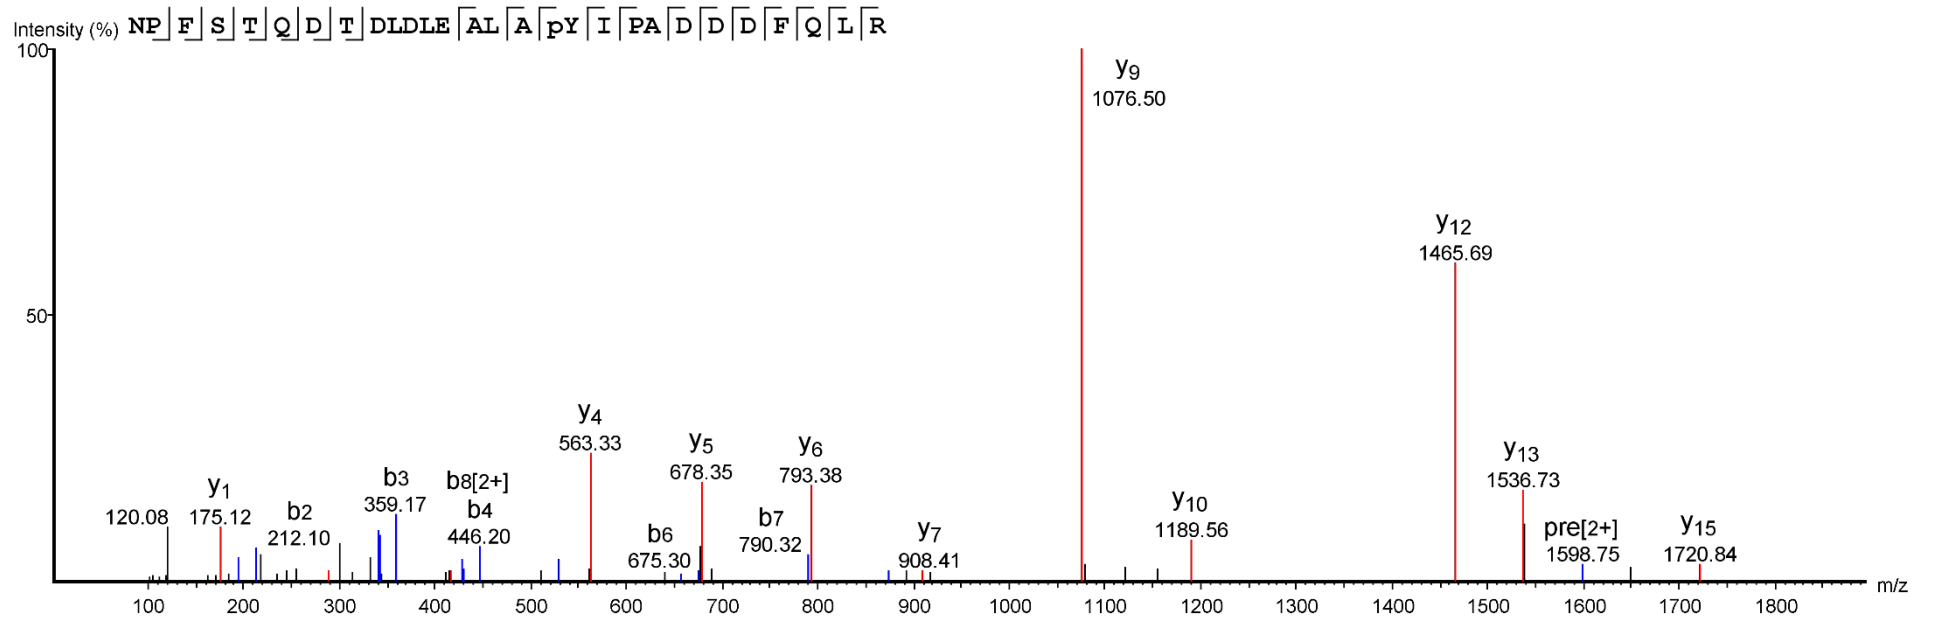

YMT51

Scan #26560



A-032: HIF1A\*<sub>(548-575)</sub>: NPFSTQDSDLLEALAPYIPADDDDFQLR

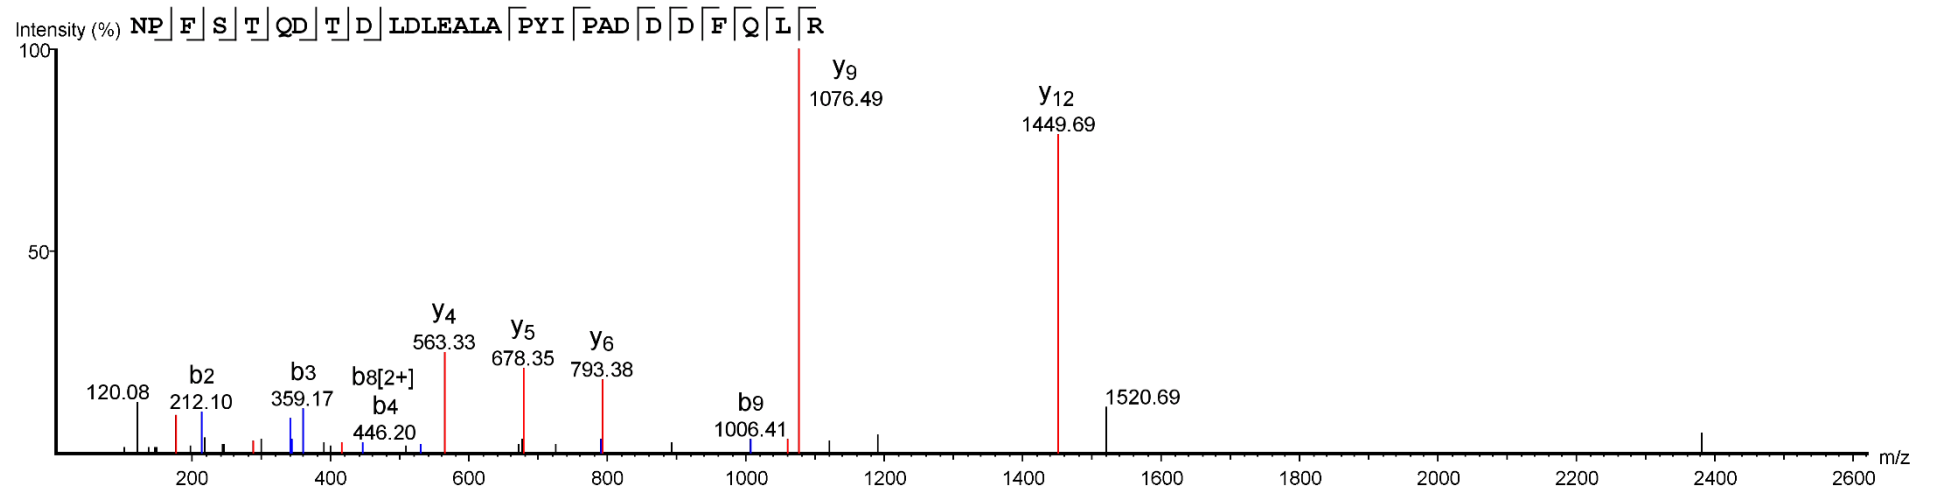

YMT41

Scan #26077

A-033: HIF1A\*<sub>(548-575)</sub>: NPFSTQDTLDLEALAPYIPADDDDFQLR

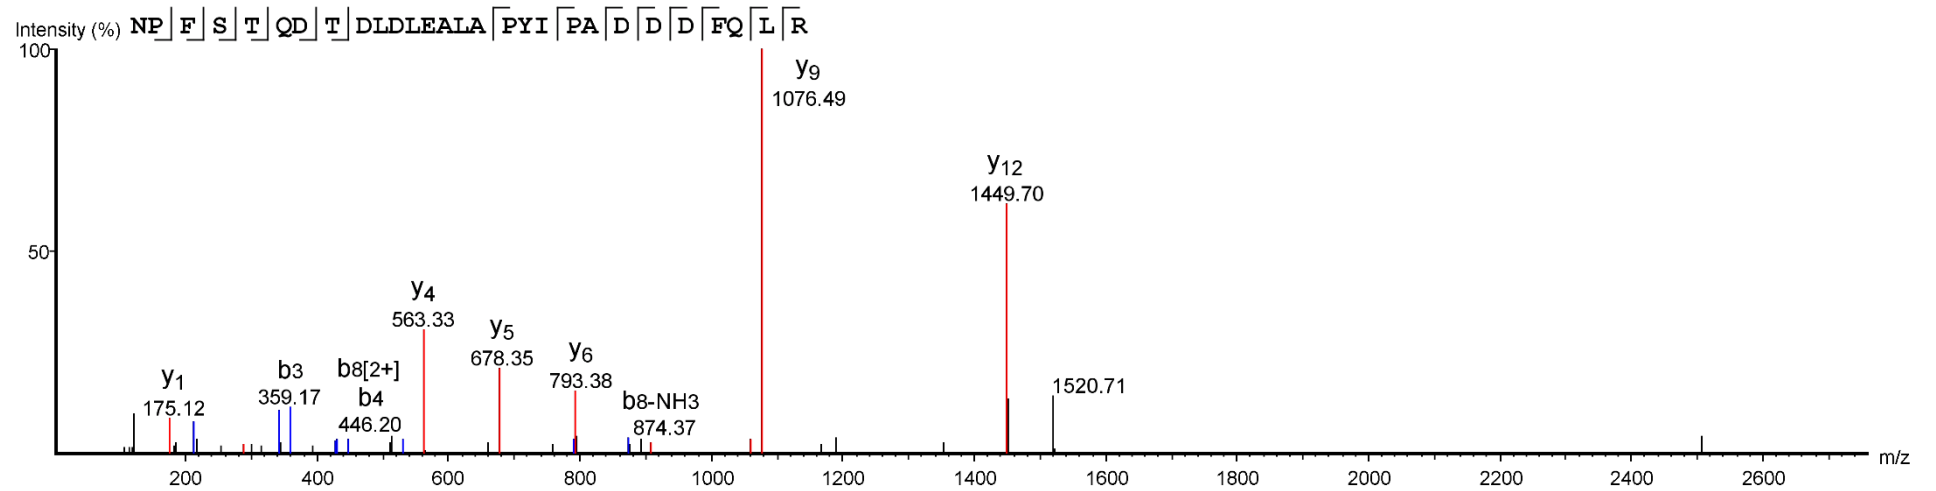

YMT42

Scan #26788

A-034: HIF1A\*<sub>(548-575)</sub>: NPFSTQD**TDL**DLEALAP(+15.99)YIPADDD**F**QLR

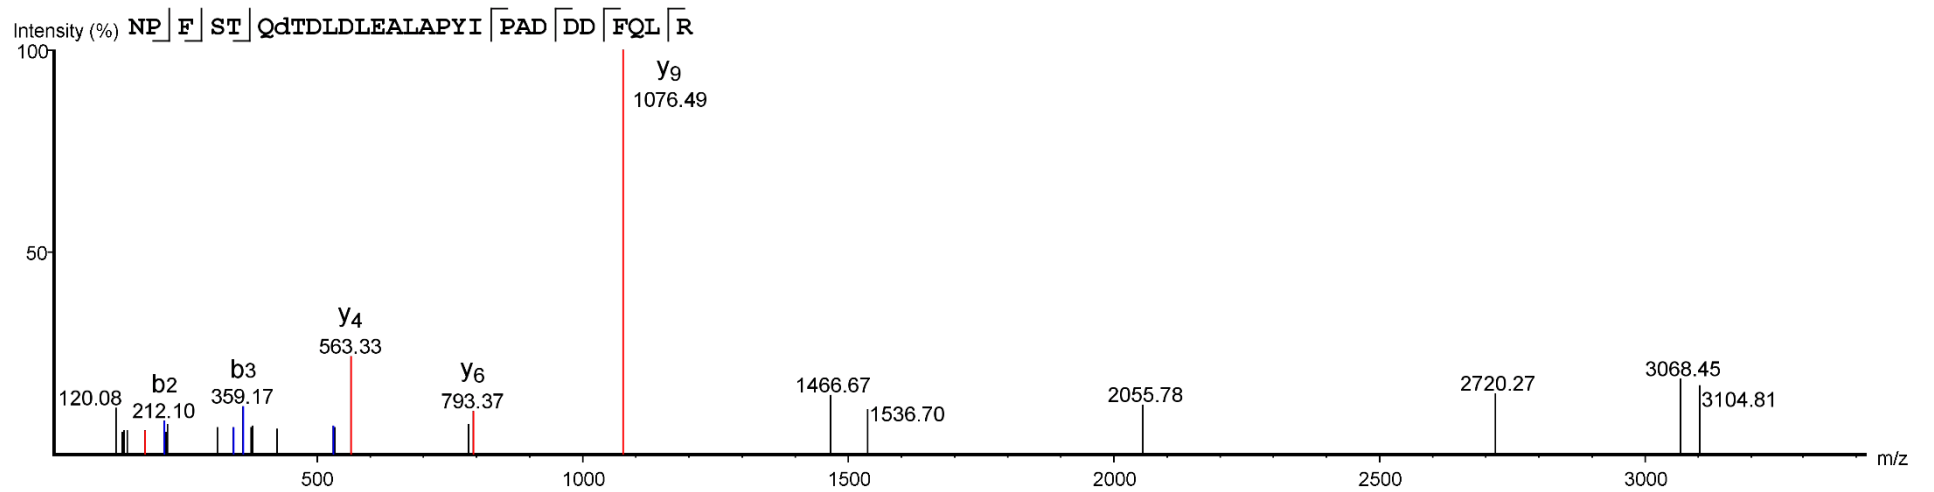

YMT41

Scan #26016

A-035: HIF1A\*<sub>(548-575)</sub>: NPFSTQD**T**LDLEAL**P**(+15.99)YIPADDD**F**QLR

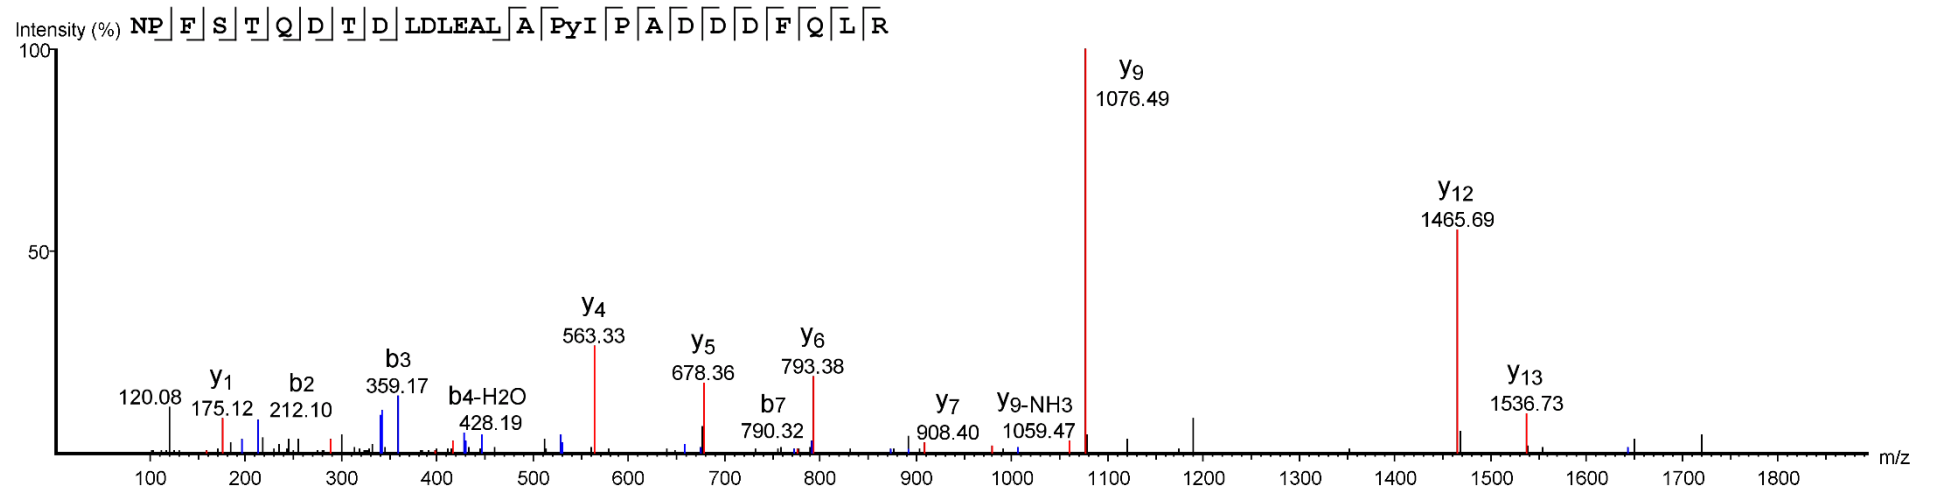

YMT42

Scan #26785

A-036: HIF1A\*<sub>(392-403)</sub>: KEPDALTLLAPA

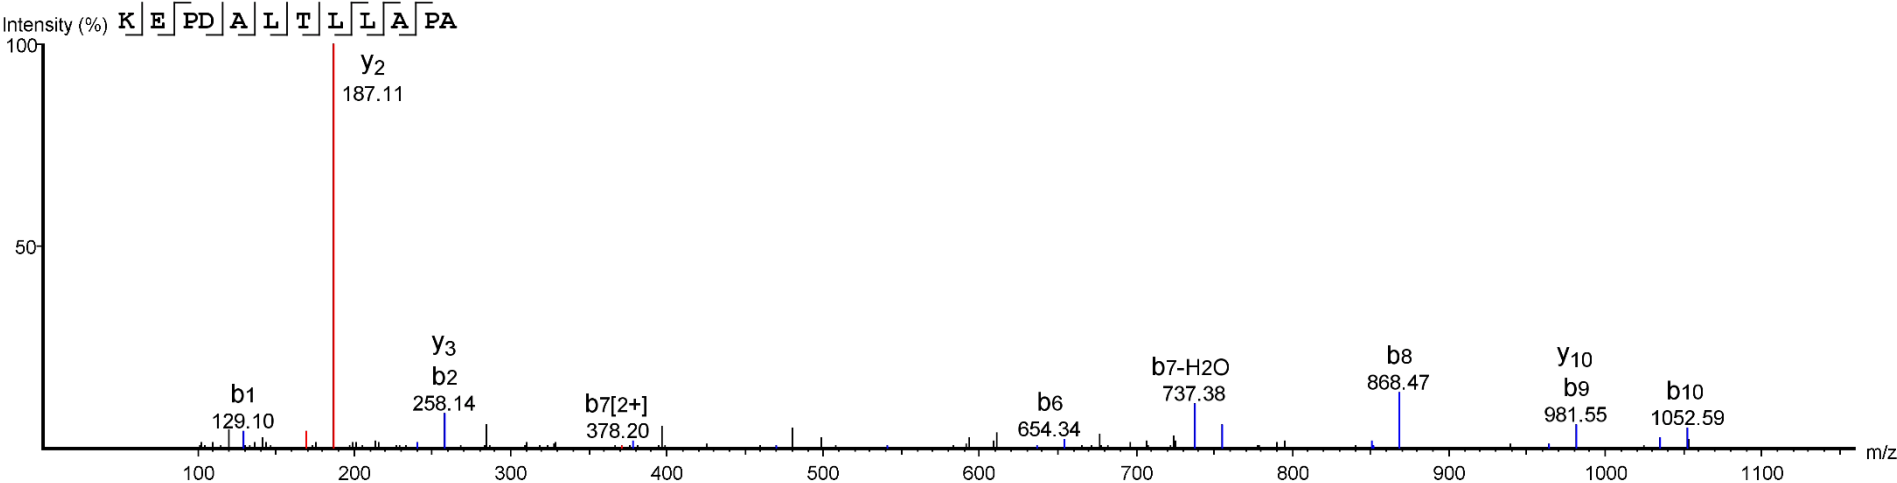

YMT41  
Scan #18035

A-037: HIF1A\*<sub>(548-575)</sub>: NPFSTQDTLDLEALAPYIPADDDDFQLR

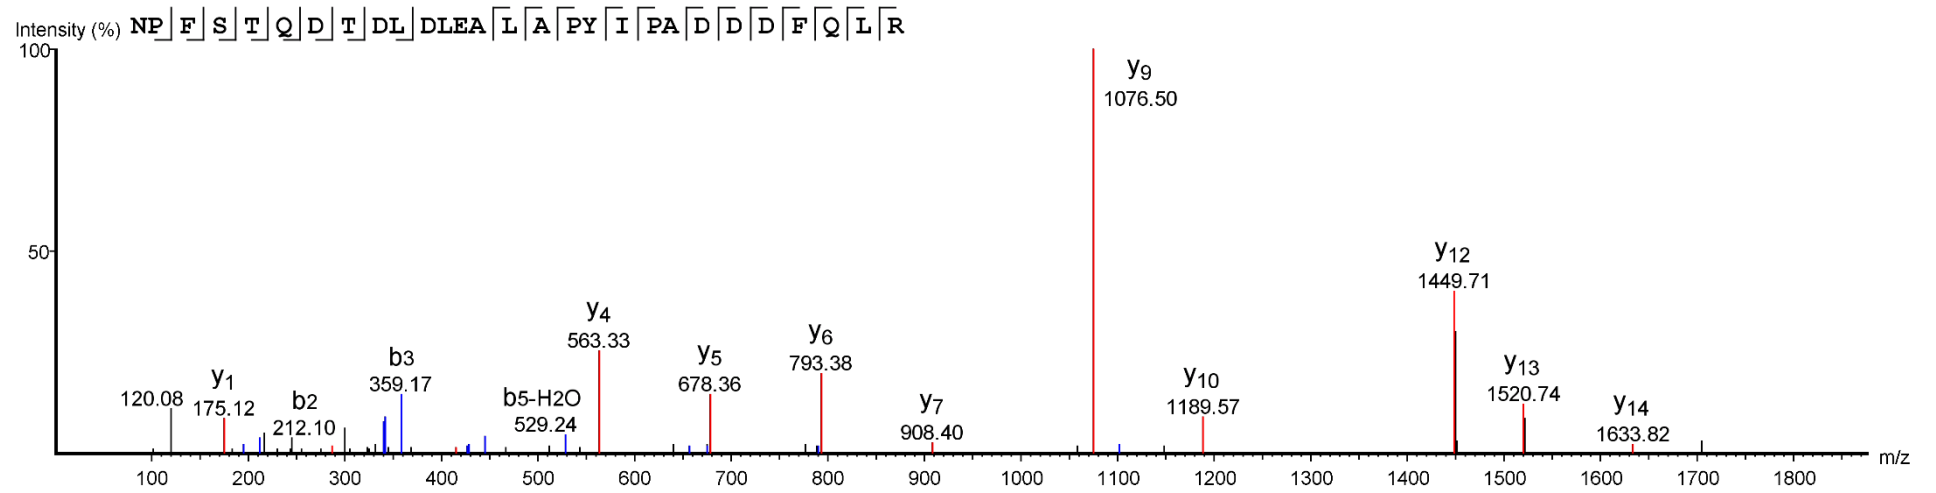

YMT65

Scan #23880

A-038: HIF1A\*<sub>(548-575)</sub>: NPFSTQDTLDLEALAPYIPADDDDFQLR

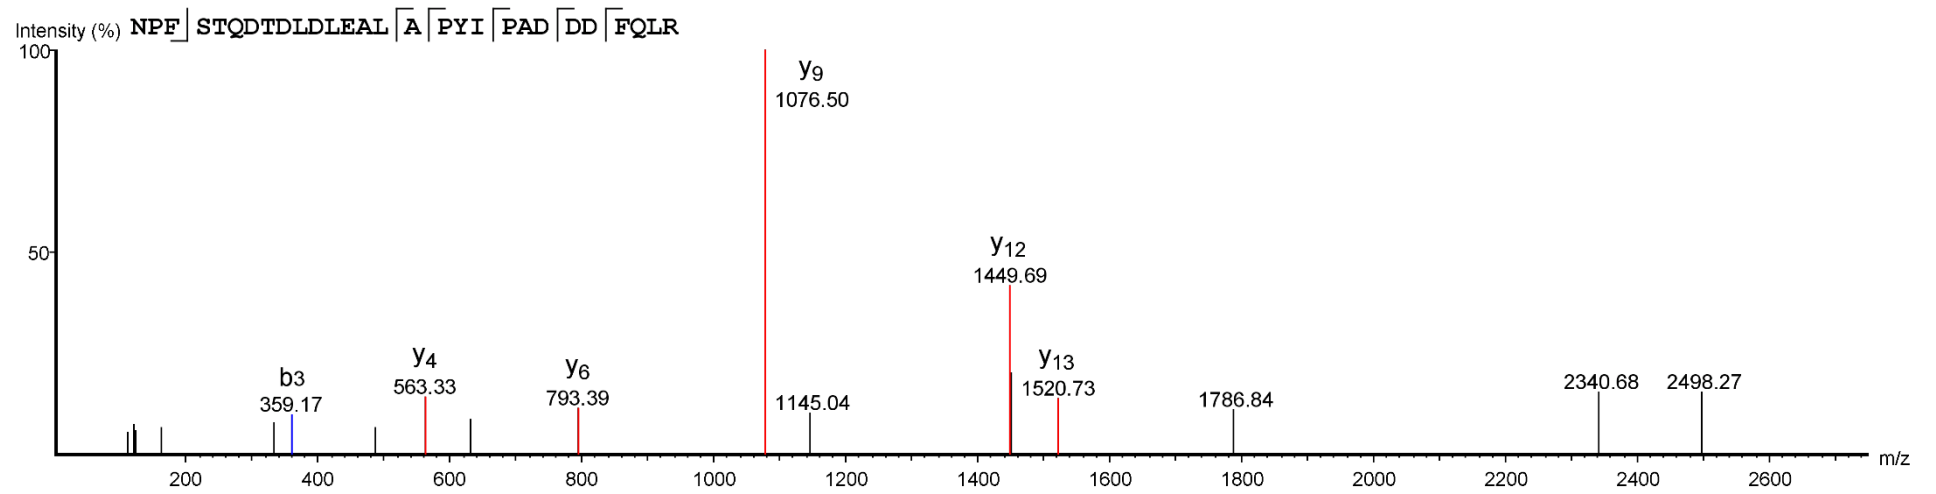

YMT66

Scan #23824

A-039: HIF1A\*<sub>(548-575)</sub>: NPFSTQD**T**LDLEALP(+15.99)YIPADDD**F**QLR

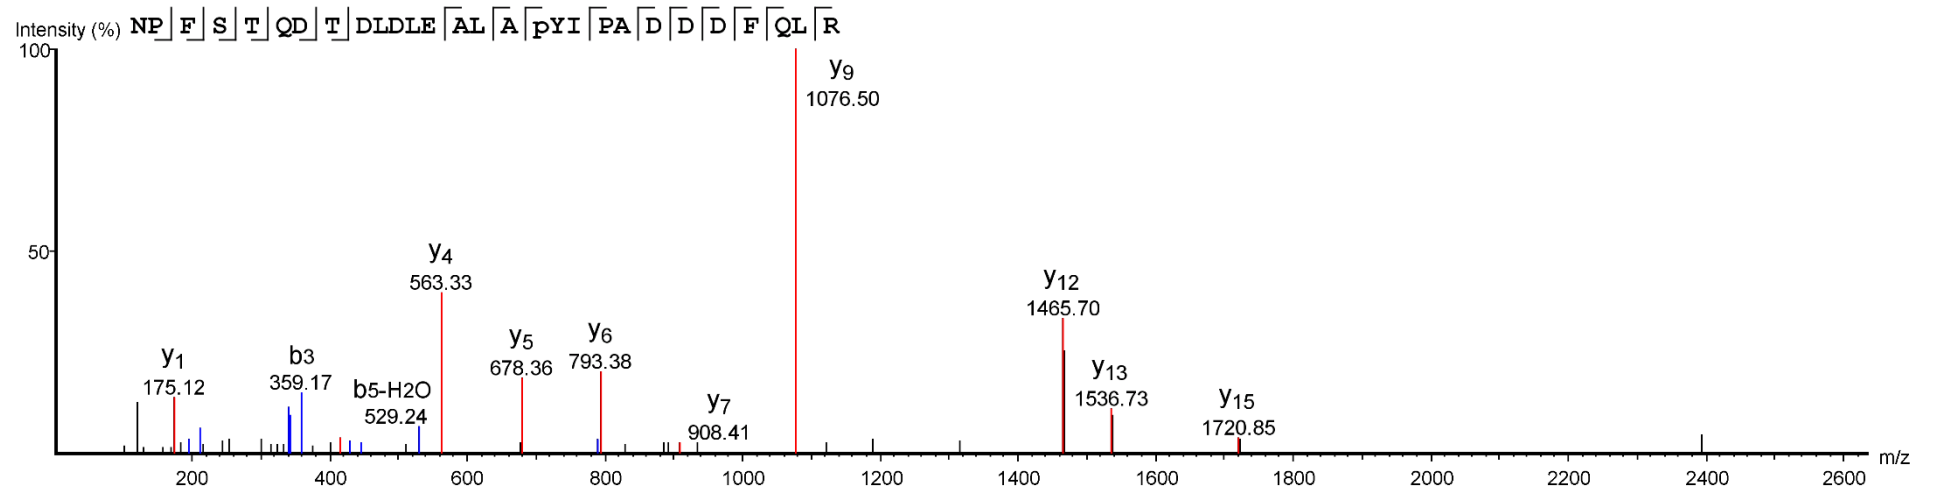

YMT65

Scan #23864



A-040: HIF1A\*<sub>(548-575)</sub>: NPFSTQD**P**(+15.99)YIPADDD**F**QLR

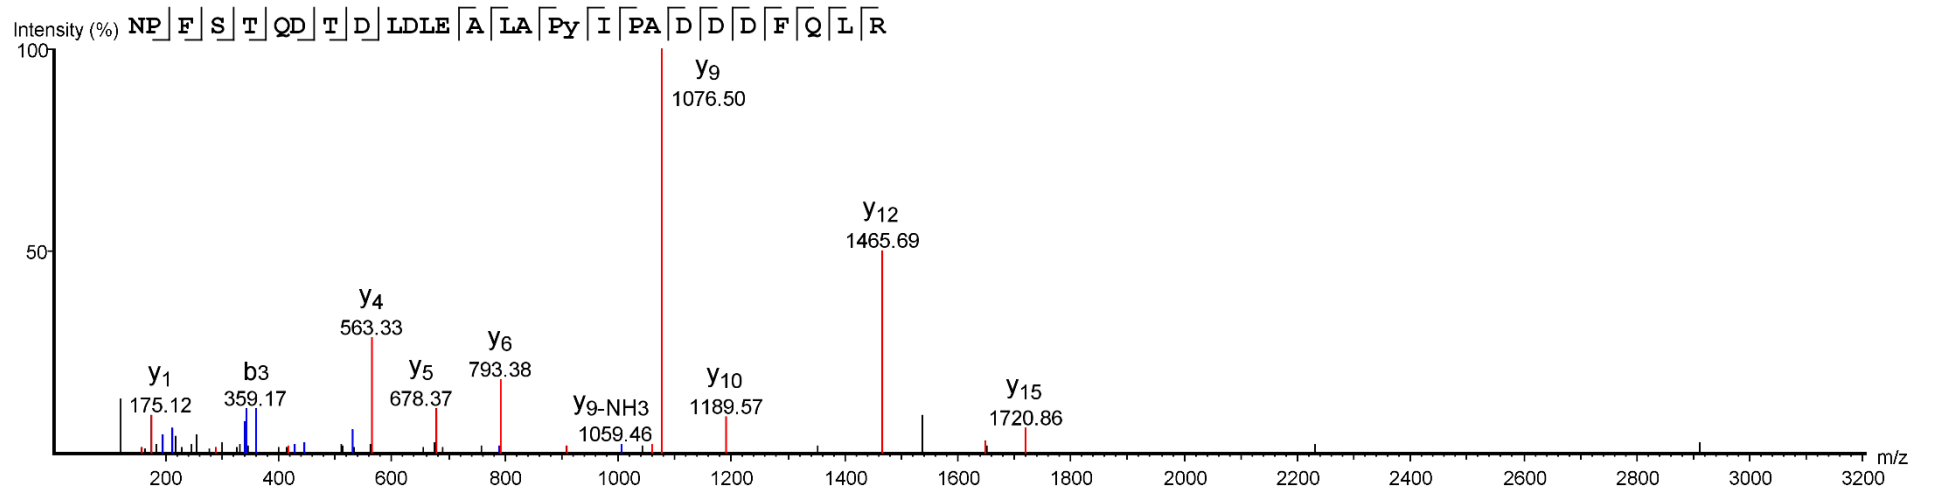

YMT66

Scan #23758

A-041: HIF1A\*<sub>(548-575)</sub>: NPFSTQDSDLLEALAPYIPADDDDFQLR

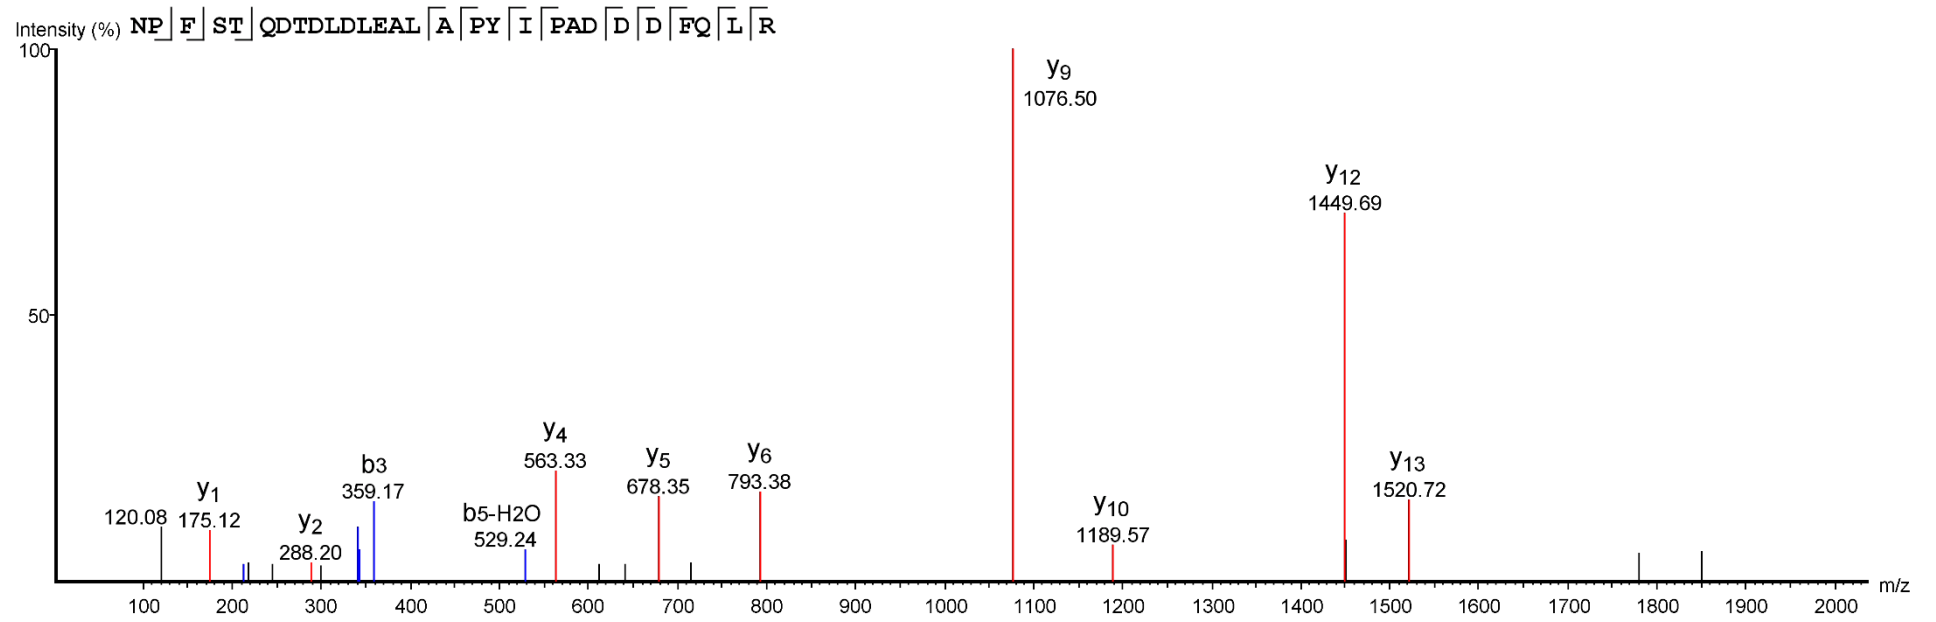

YMT61

Scan #23277

A-042: HIF1A\*<sub>(548-575)</sub>: NPFSTQD<sup>+</sup>TDLDLEALAPYIPADDDDFQLR

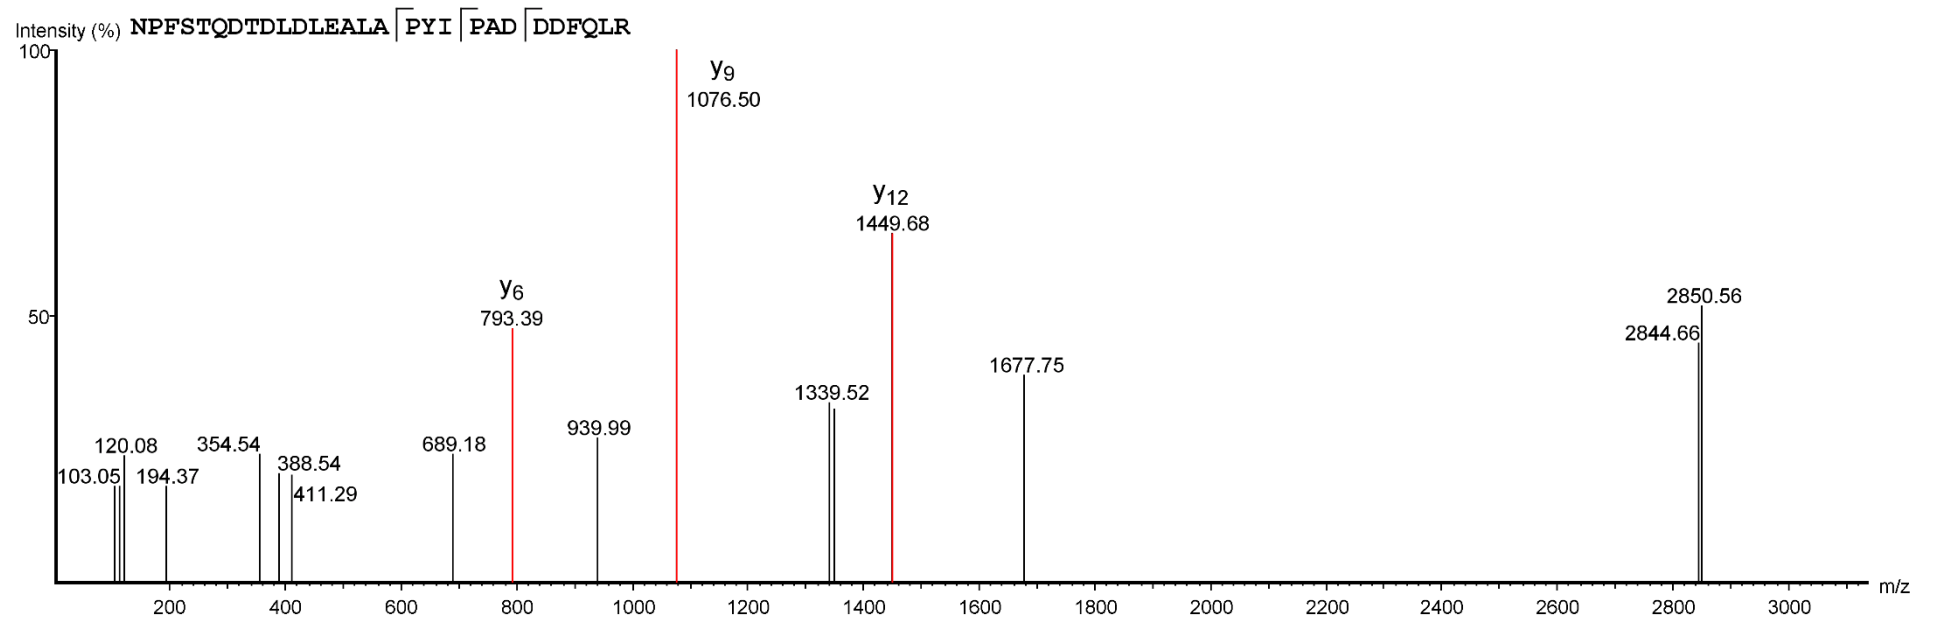

YMT62

Scan #22916

A-043: HIF1A\*<sub>(548-575)</sub>: NPFSTQD**T**LDLEALP(+15.99)YIPADDD**F**QLR

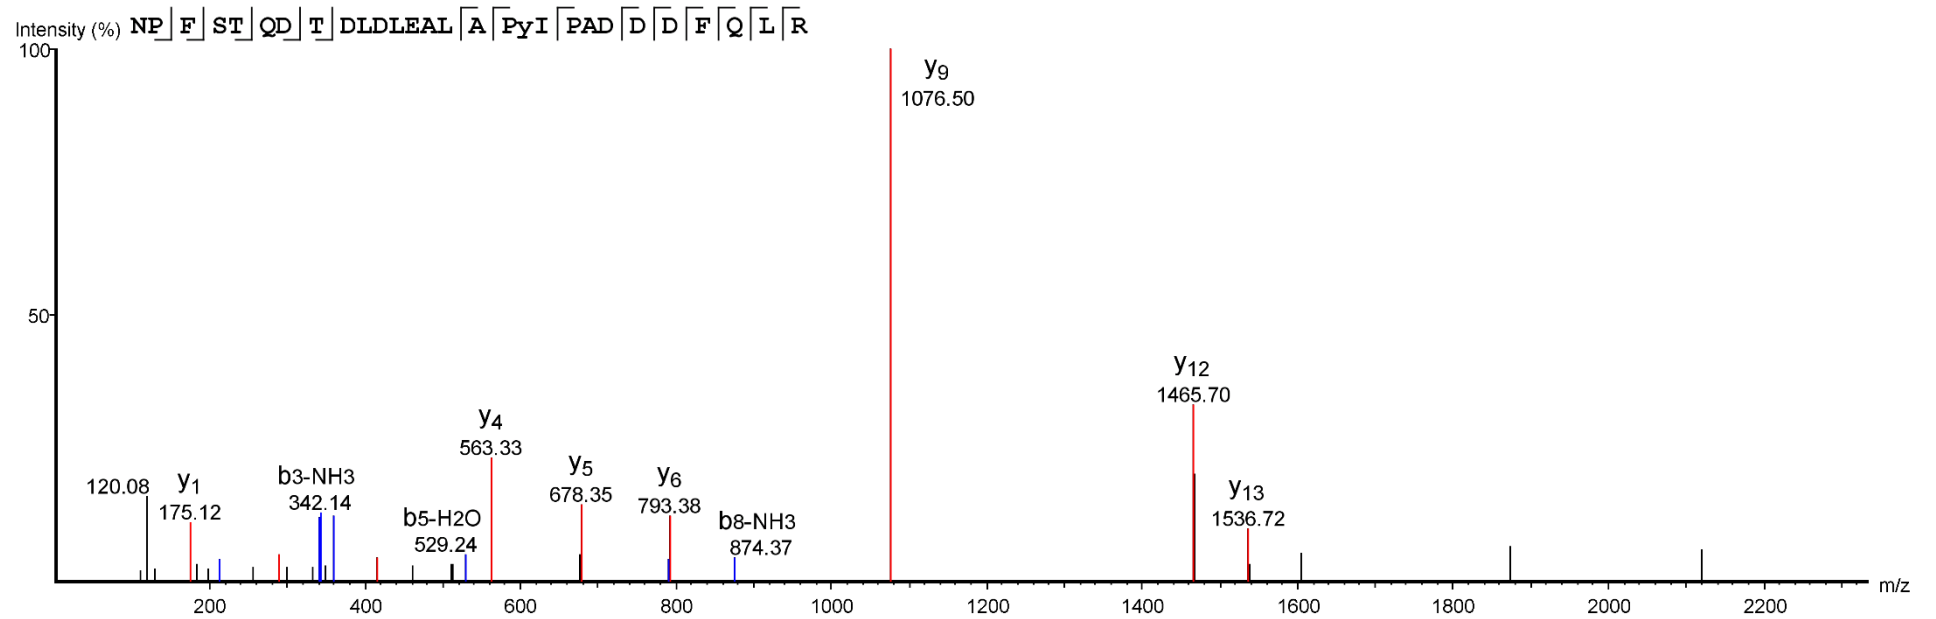

YMT61

Scan #23268

A-044: HIF1A\*<sub>(548-575)</sub>: NPFSTQD**T**DL**D**LEAL**A**P(+15.99)YIPADDD**F**QL**R**

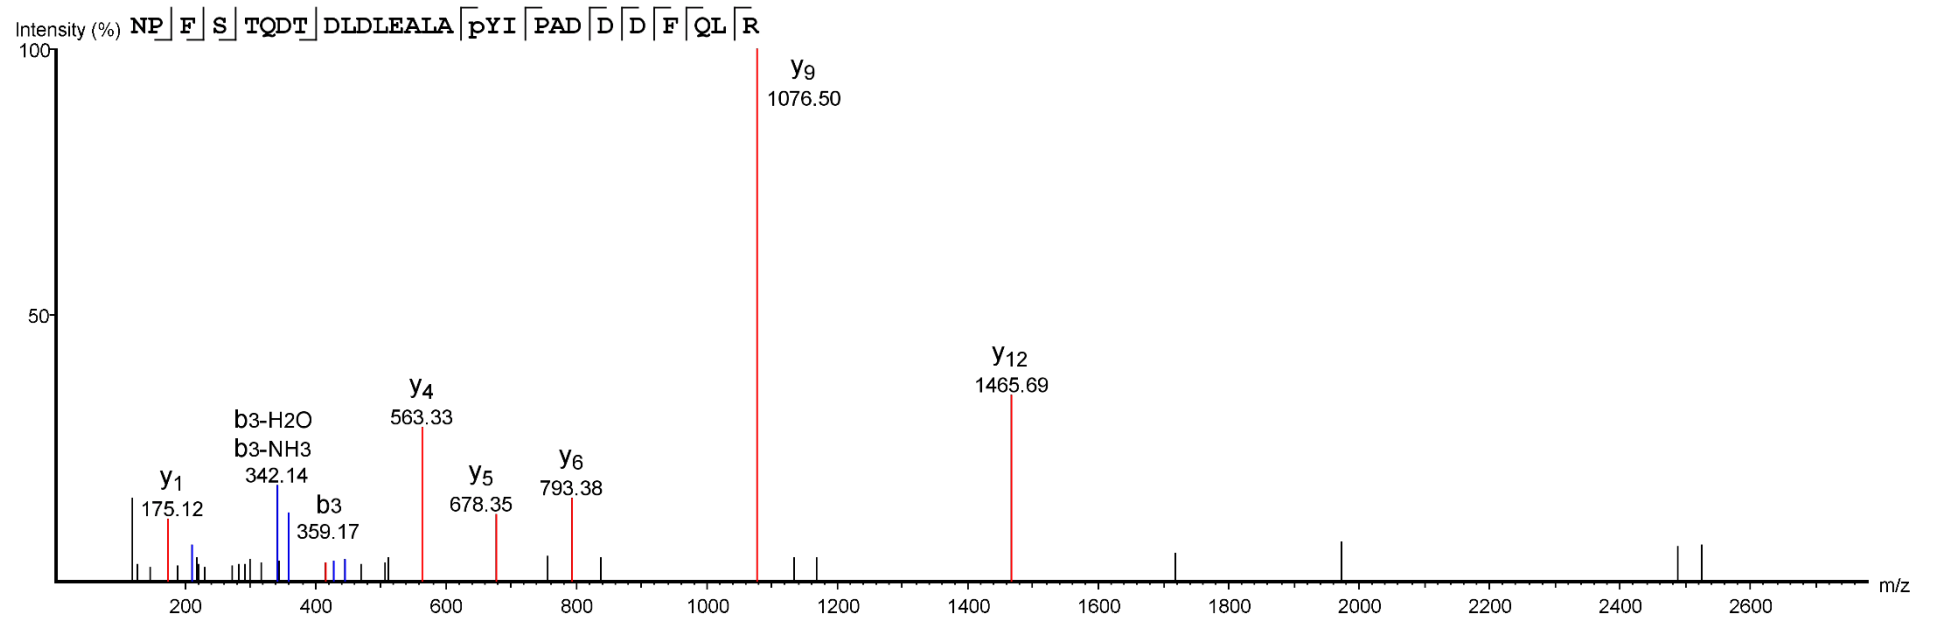

YMT62

Scan #22900

A-045: HIF1A\*<sub>(392-403)</sub>: KEPDALTL~~L~~AP(+15.99)A

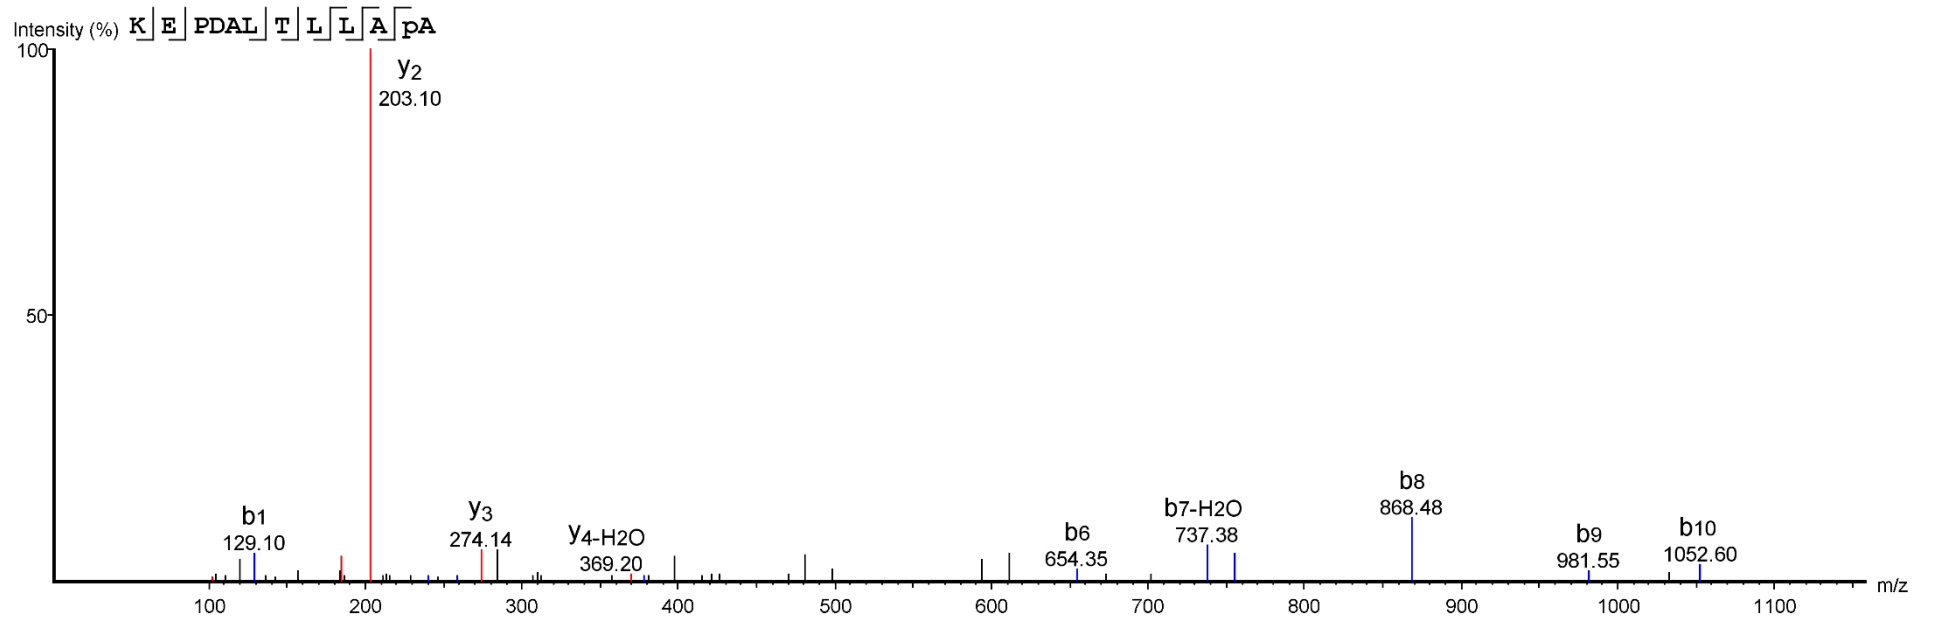

YMT62

Scan #13681

A-046: HIF1A\*<sub>(392-411)</sub>: **KEPDALTL**L**LA**P(+15.99)**AA**GDTIISL

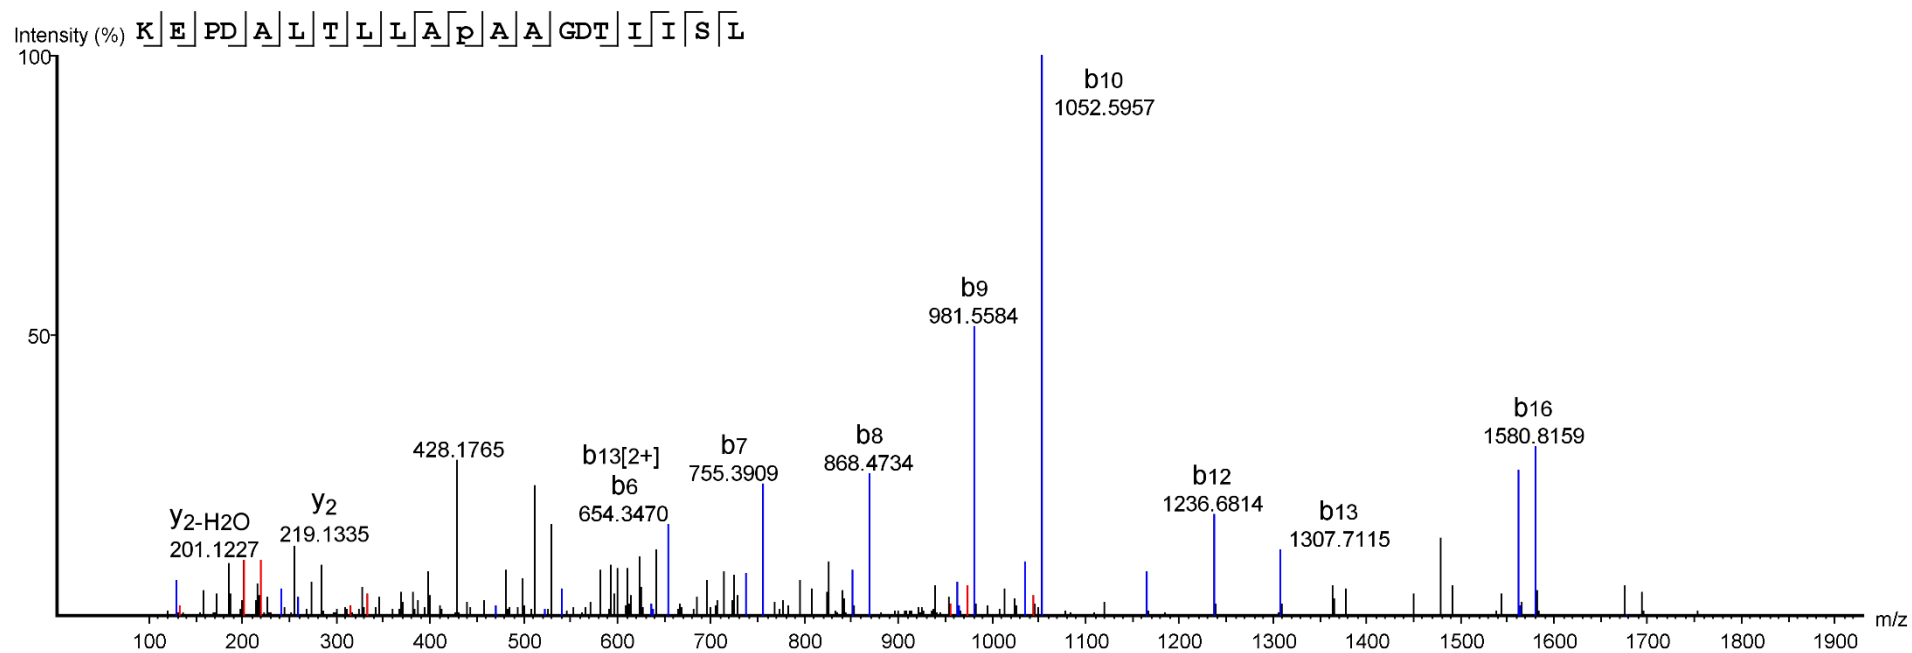

YMT109

Scan #25298

A-047: HIF1A\*<sub>(392-411)</sub>: KEPDALTLLAP(+15.99)AAGDTIISL

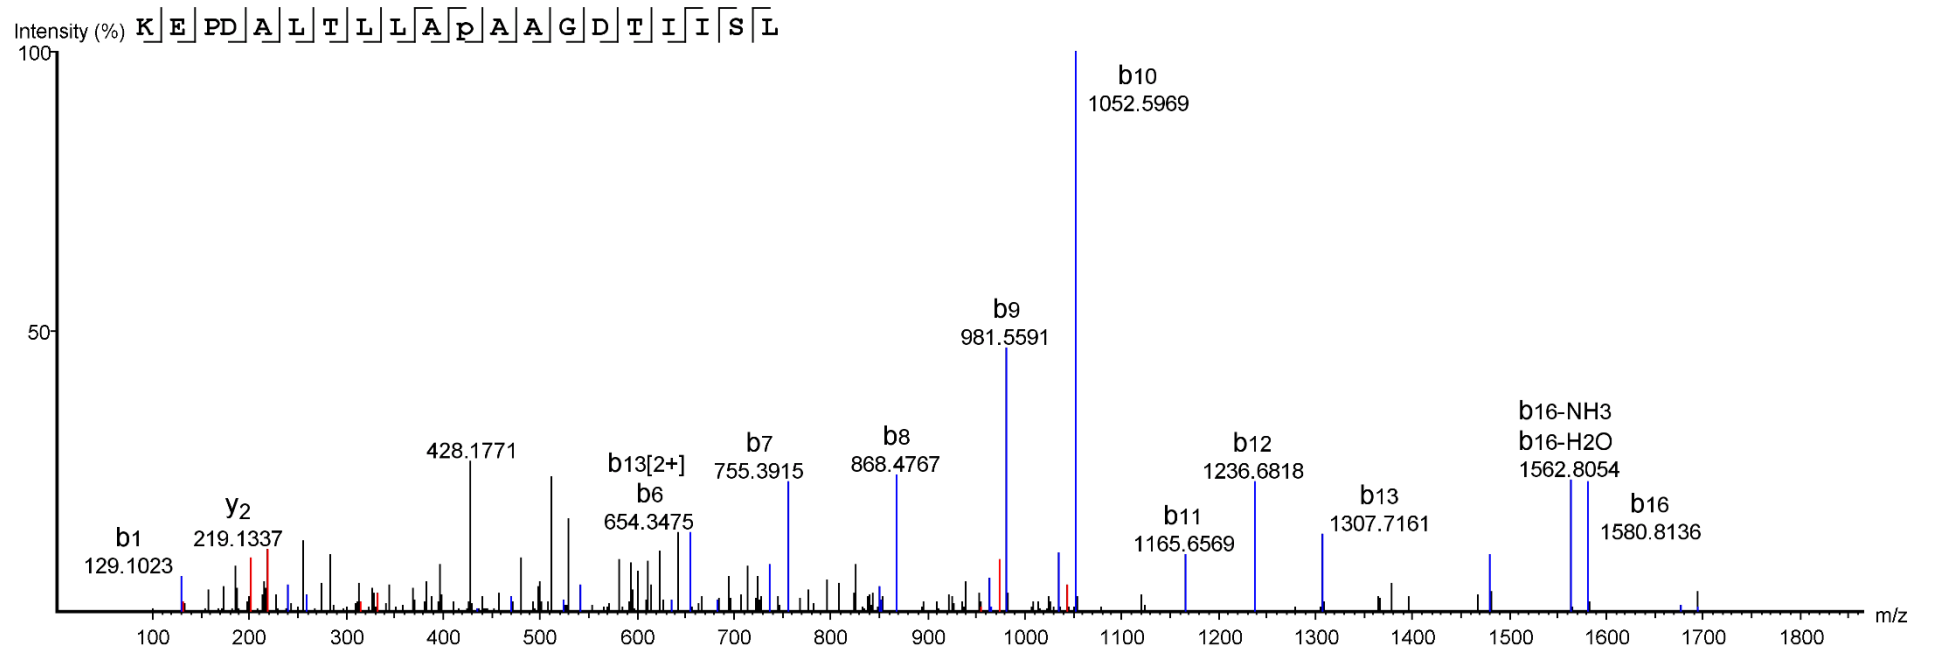

YMT110

Scan #25316



A-048: HIF1A\*<sub>(548-575)</sub>: NPFSTQDSDLLEALAPYIPADDDDFQLR

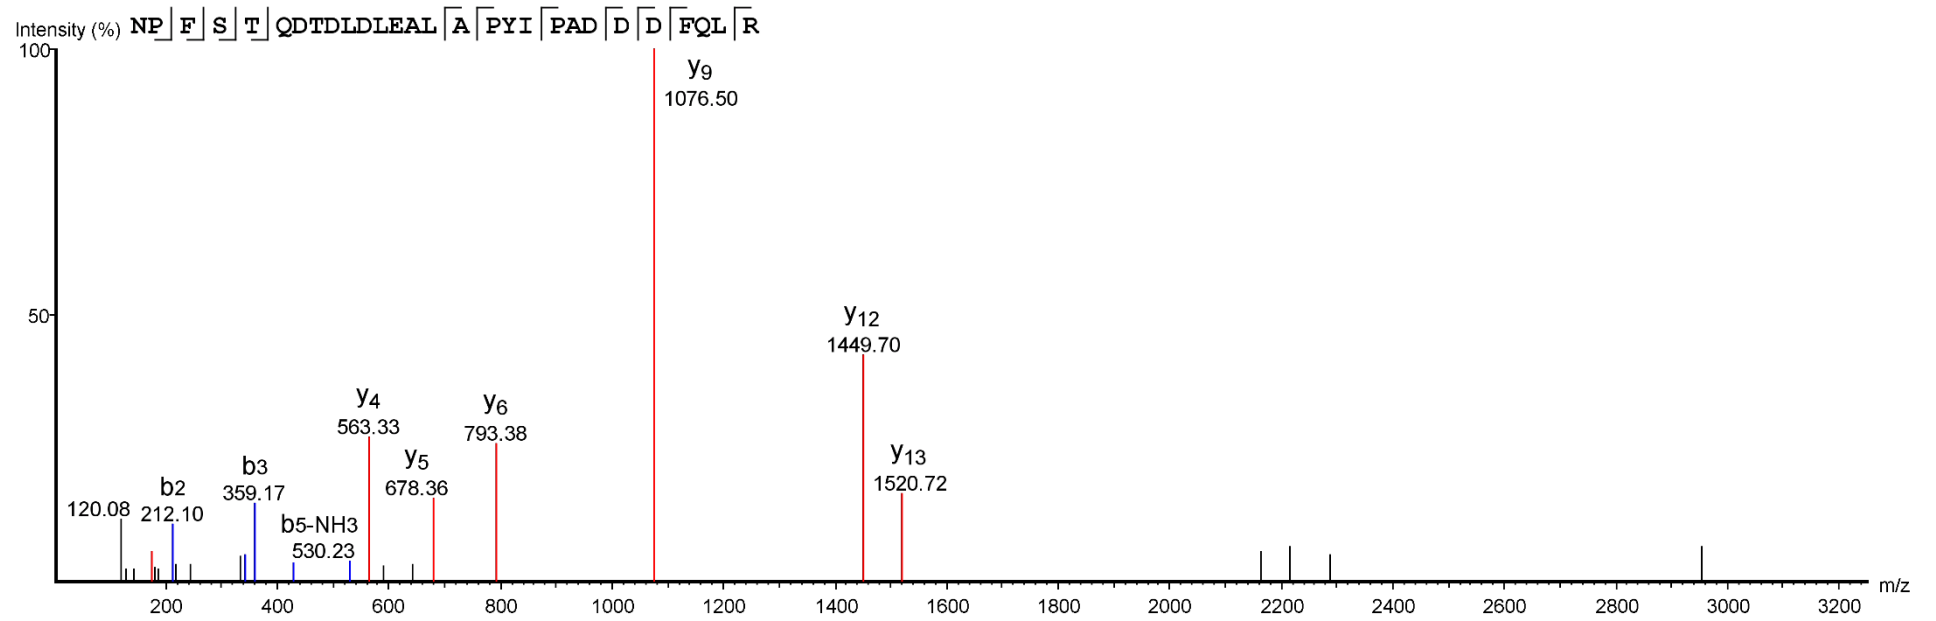

YMT59

Scan #24828

A-049: HIF1A\*<sub>(548-575)</sub>: NPFSTQD~~T~~LDLEALAP~~P~~YIPADDDFQLR

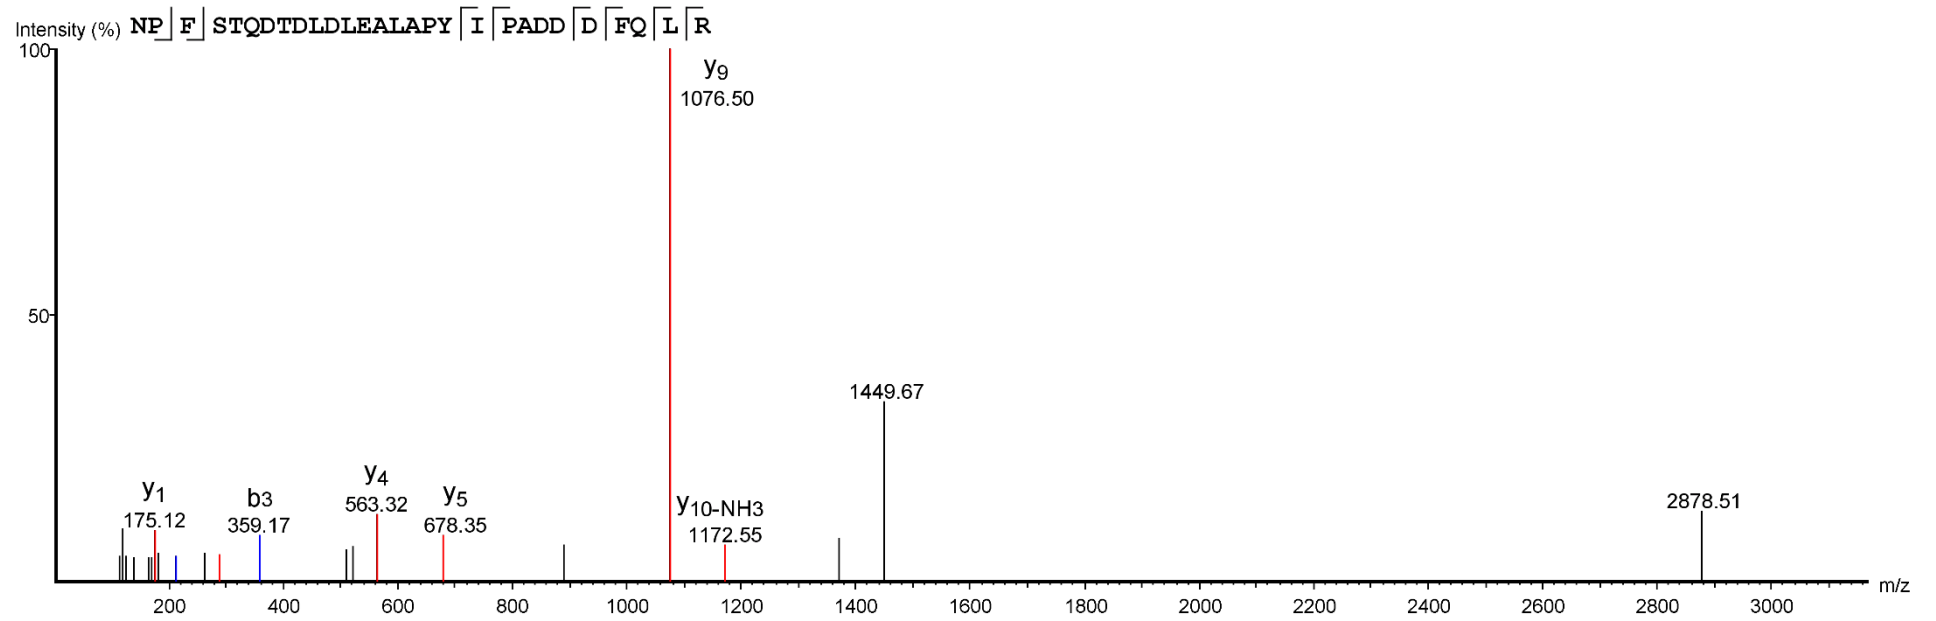

YMT60

Scan #25256

A-050: HIF1A\*<sub>(548-575)</sub>: NPFSTQDTLDLEALP(+15.99)YIPADDDFQLR

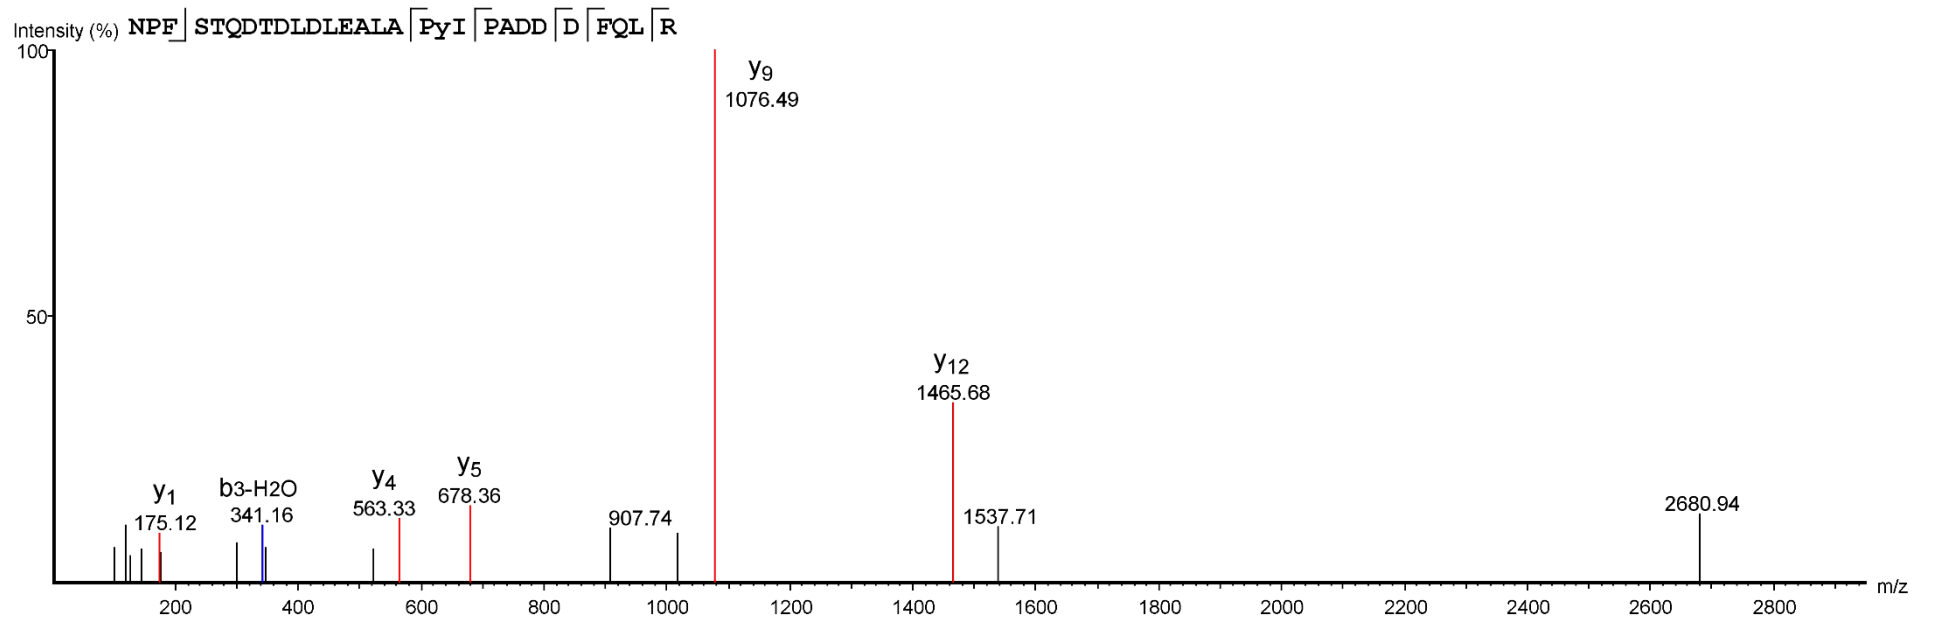

YMT59

Scan #24786

A-051: HIF1A\*<sub>(548-575)</sub>: NPFSTQD**T**LDLEAL**P**(+15.99)YIPADDD**F**QLR

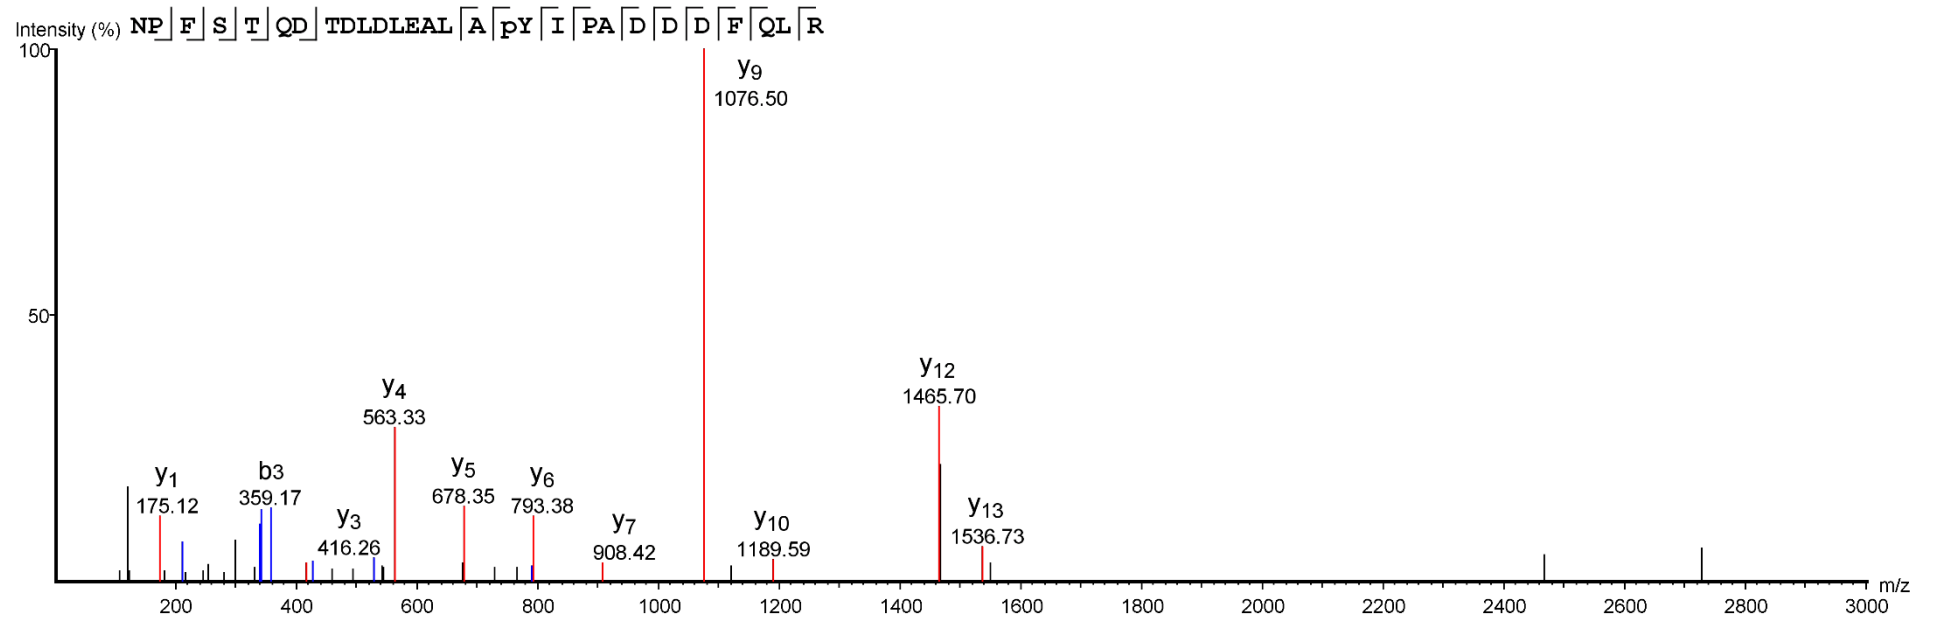

YMT60

Scan #25207

A-052: HIF1A\*<sub>(392-403)</sub>: KEPDALTLLAPA

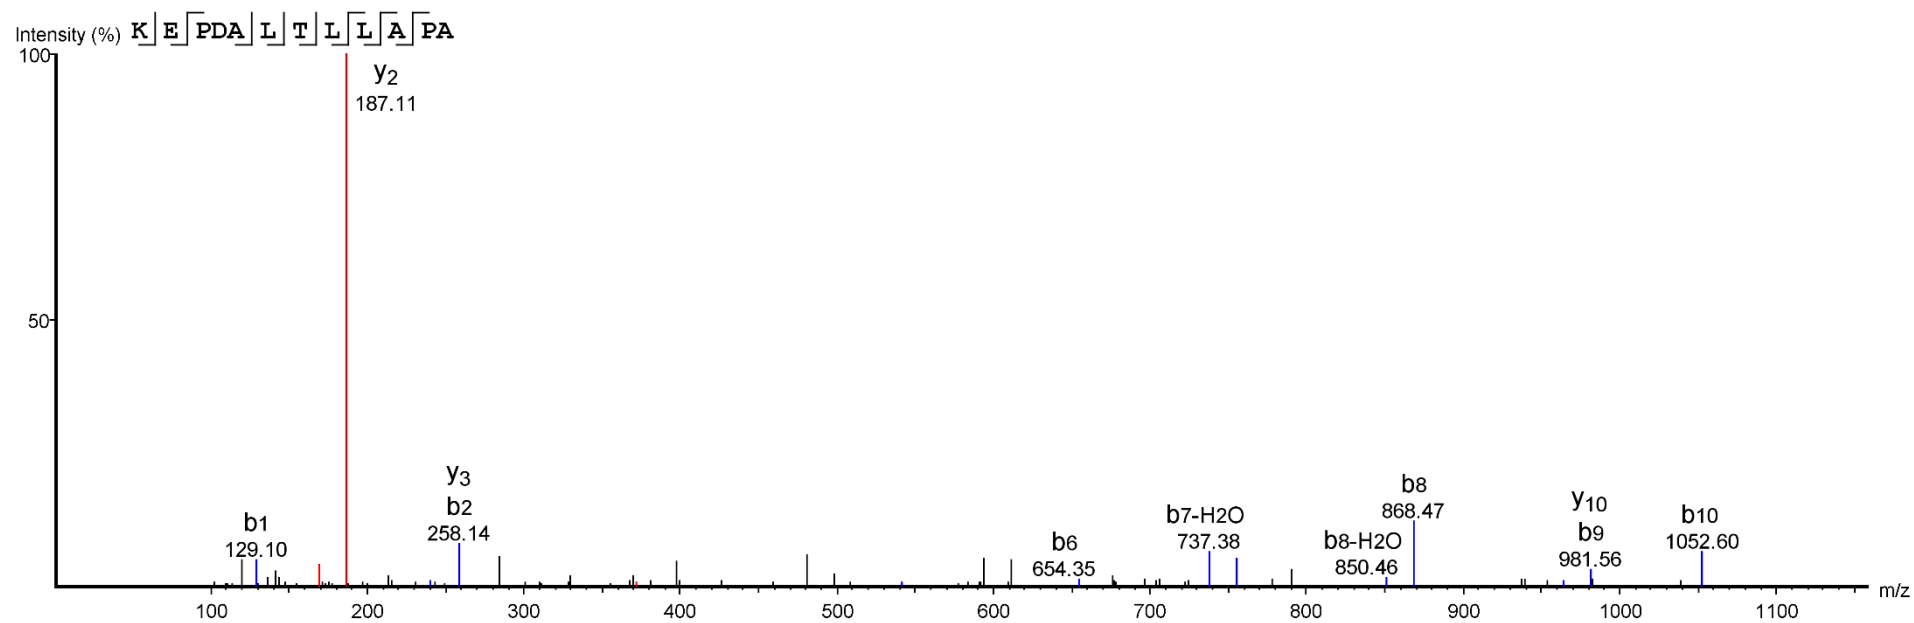

YMT59

Scan #17060

A-053: HIF1A\*<sub>(392-403)</sub>: KEPDAL TLLAP(+15.99)A

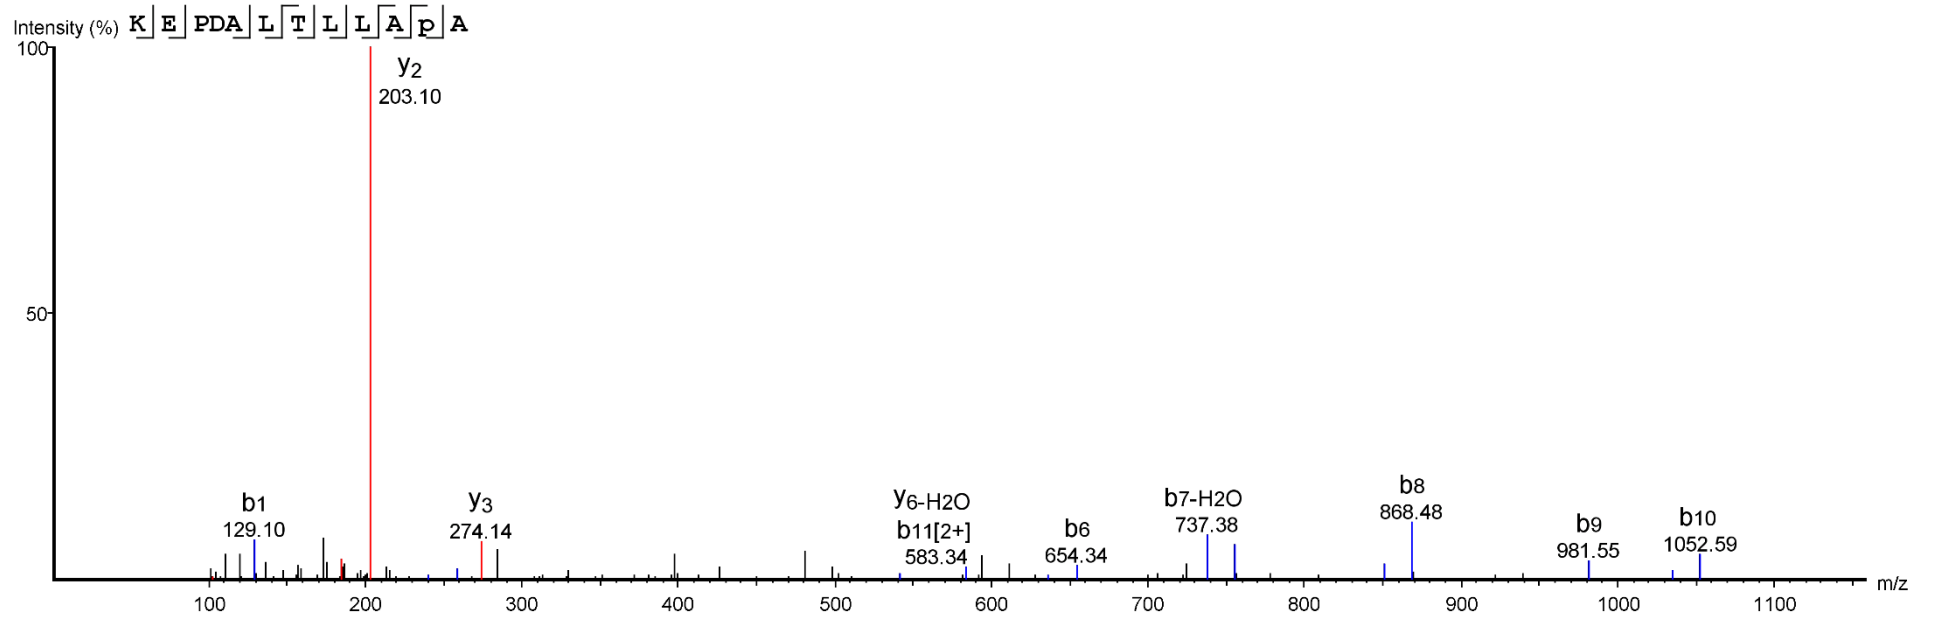

YMT60

Scan #15751

A-054: HIF1A\*<sub>(548-575)</sub>: NPFSTQDTLDLEALAPYIPADDDDFQLR

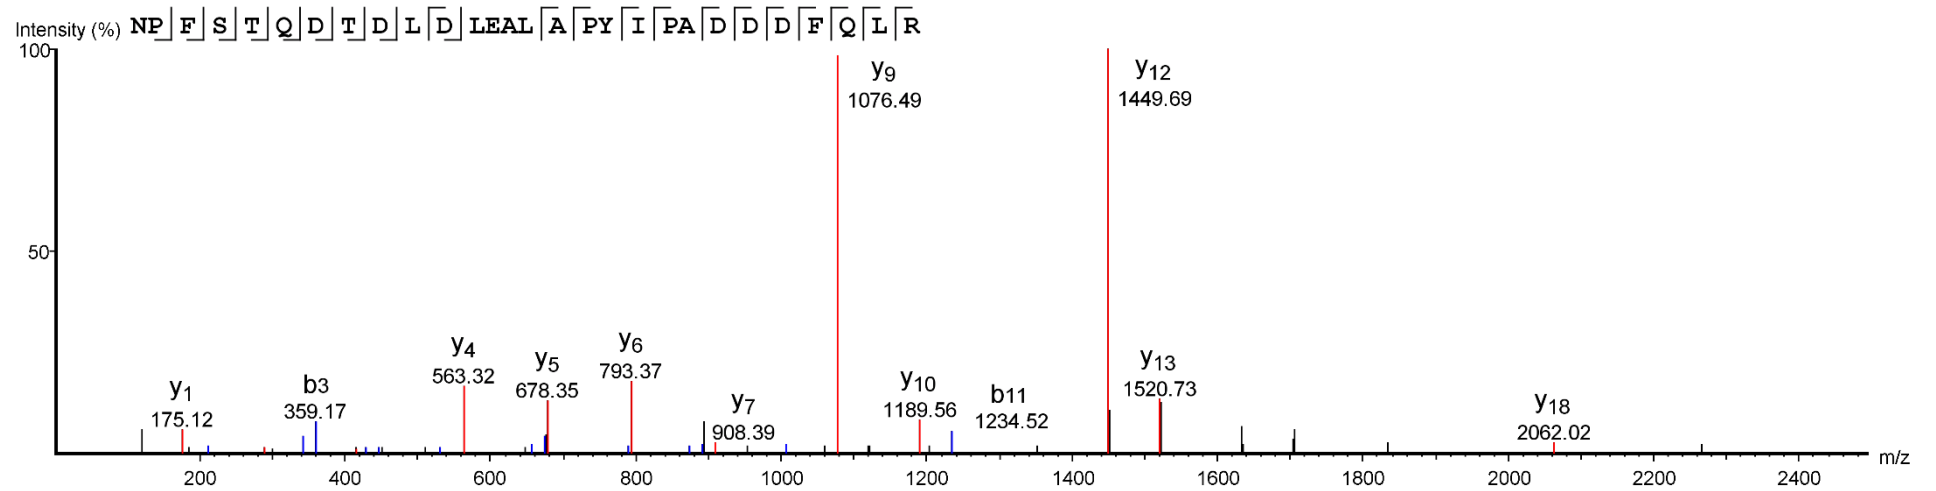

YMT69

Scan #25372

A-055: HIF1A\*<sub>(548-575)</sub>: NPFSTQDSDLLEALAPYIPADDDDFQLR

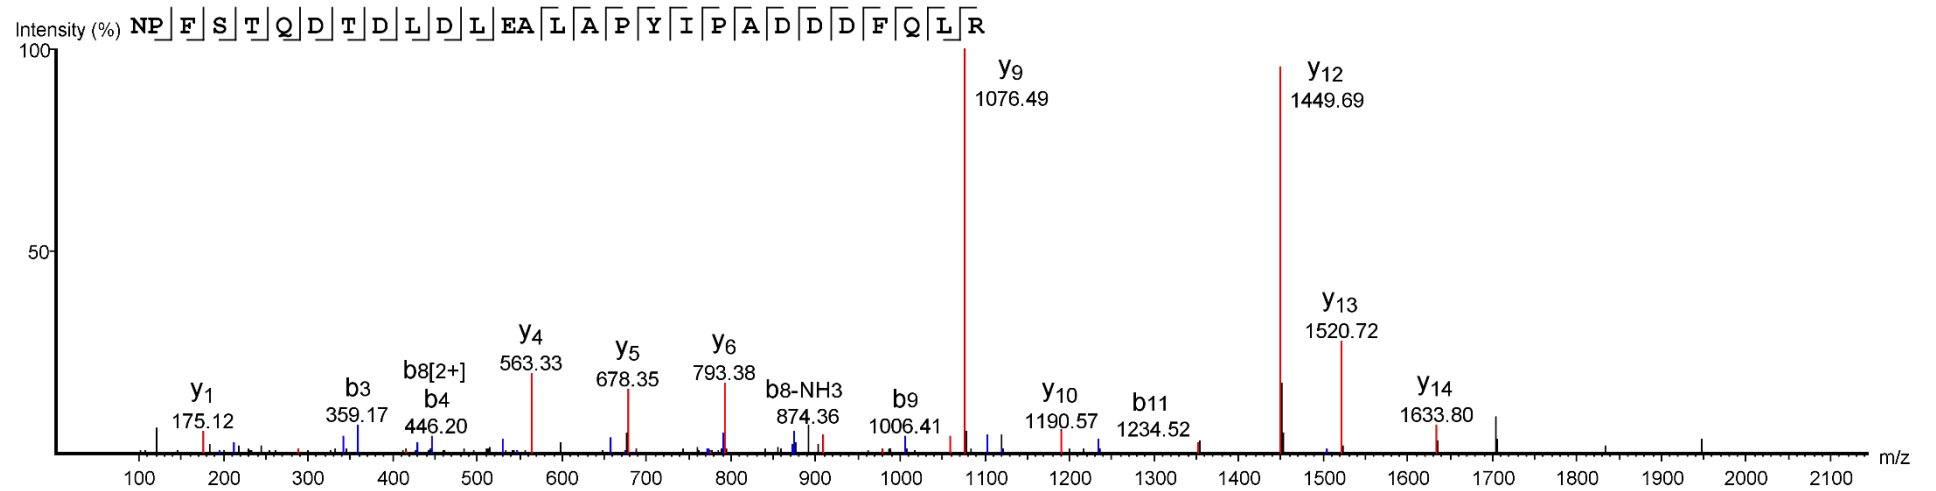

YMT70

Scan #25511



A-056: HIF1A\*<sub>(548-575)</sub>: NPFSTQDLDLDLEALP(+15.99)YIPADDDDFQLR

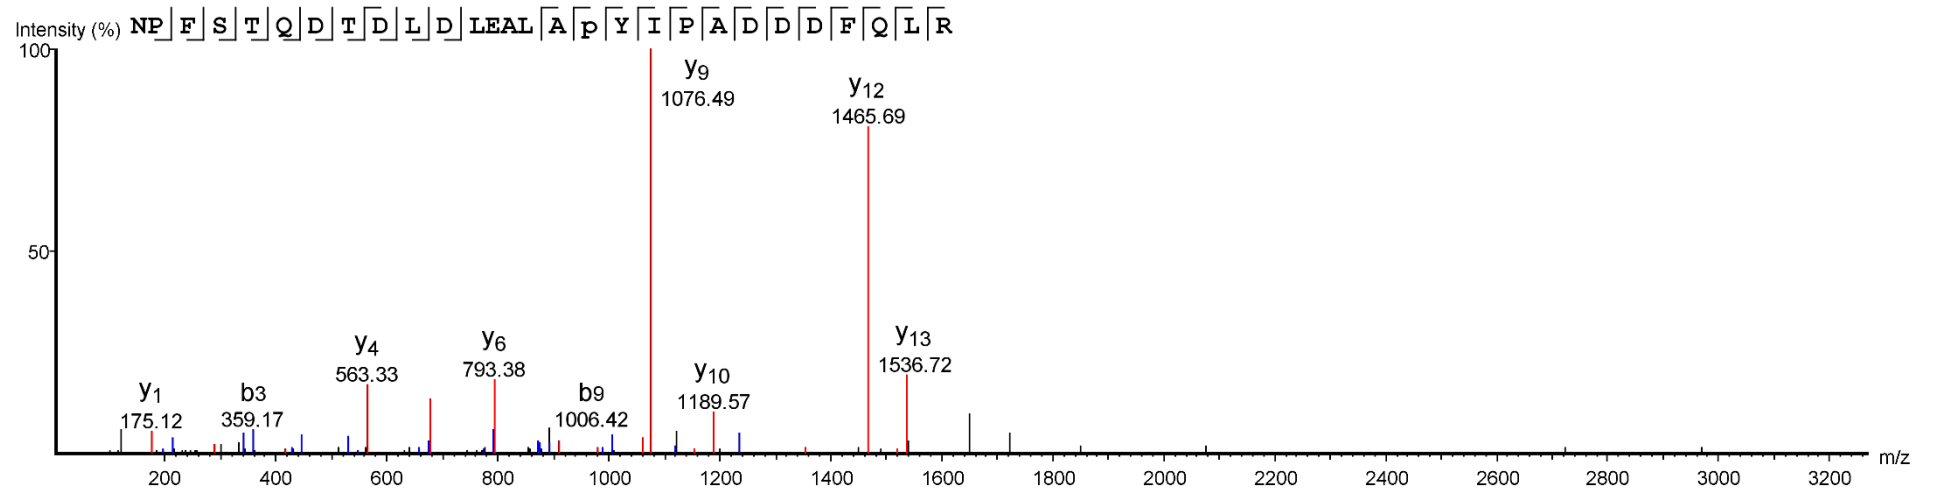

YMT69

Scan #25308

A-057: HIF1A\*<sub>(548-575)</sub>: NPFSTQD**T**DL**D**LEAL**A**P(+15.99)YIPADDD**F**QLR

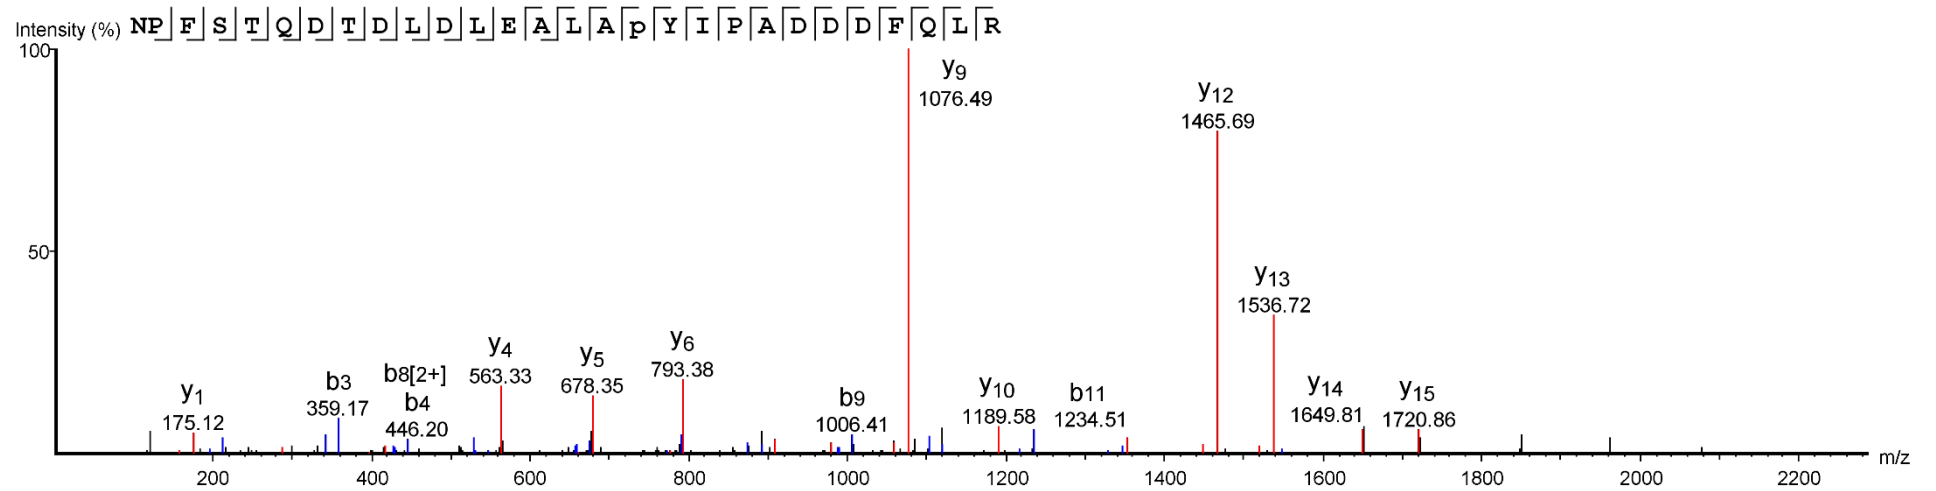

YMT70

Scan #25461

A-058: HIF1A\*<sub>(392-411)</sub>: KEPDALTL~~L~~PAAGDTIISL

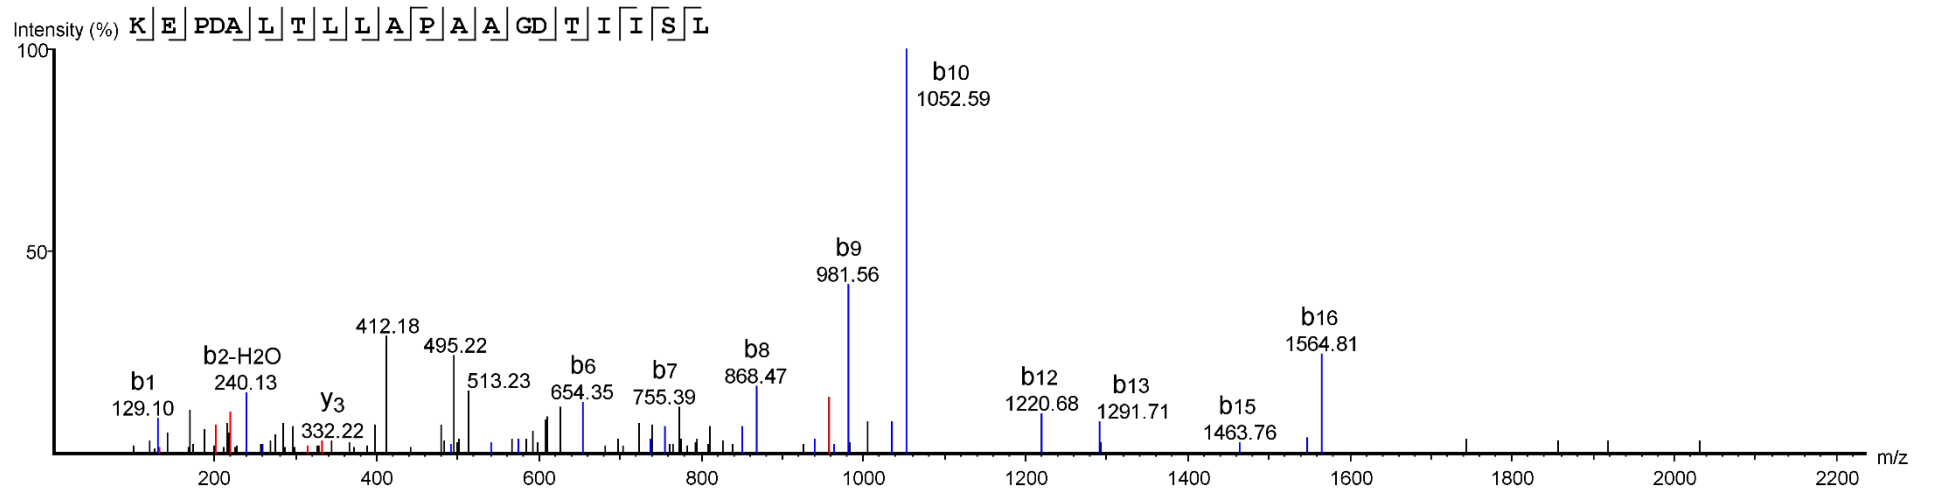

YMT69

Scan #23873

A-059: HIF1A\*<sub>(392-411)</sub>: KEPDALTL~~L~~PAAGDTIISL

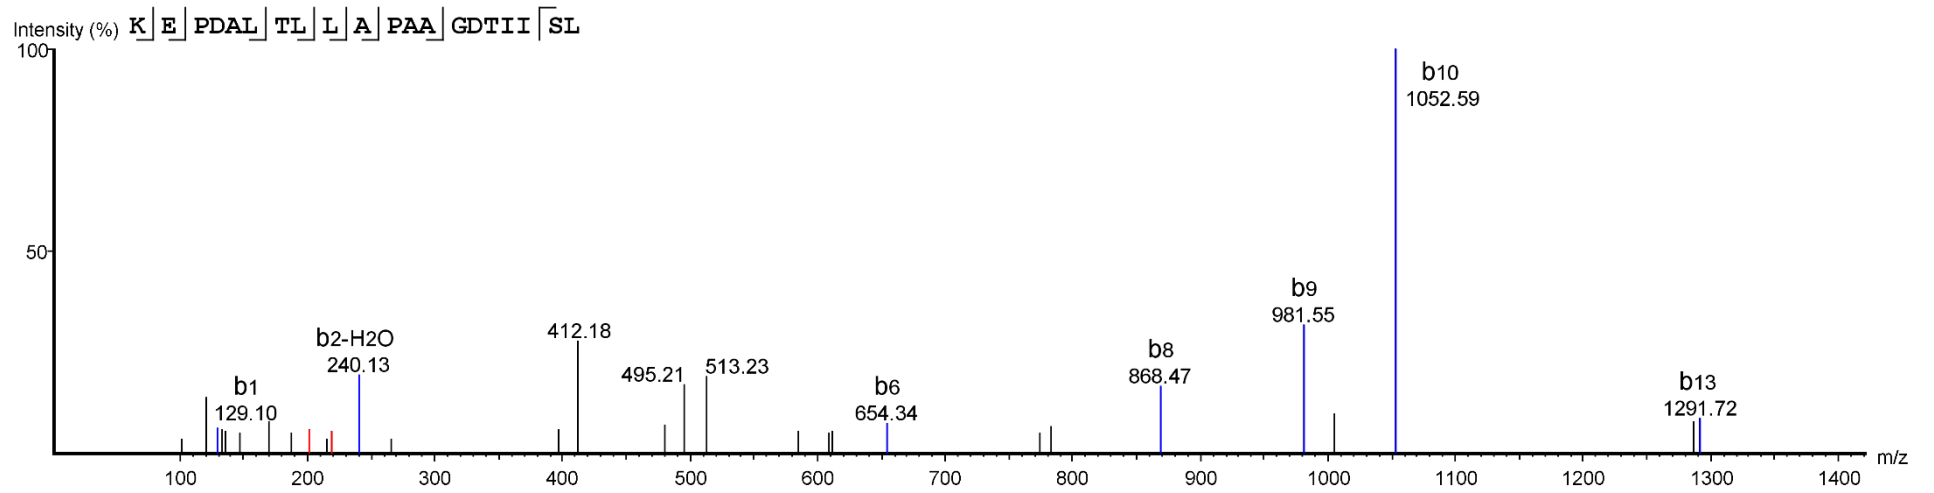

YMT70

Scan #24139

A-060: HIF1A\*<sub>(392-411)</sub>: KEPDALTLLAP(+15.99)AAGDTIISL

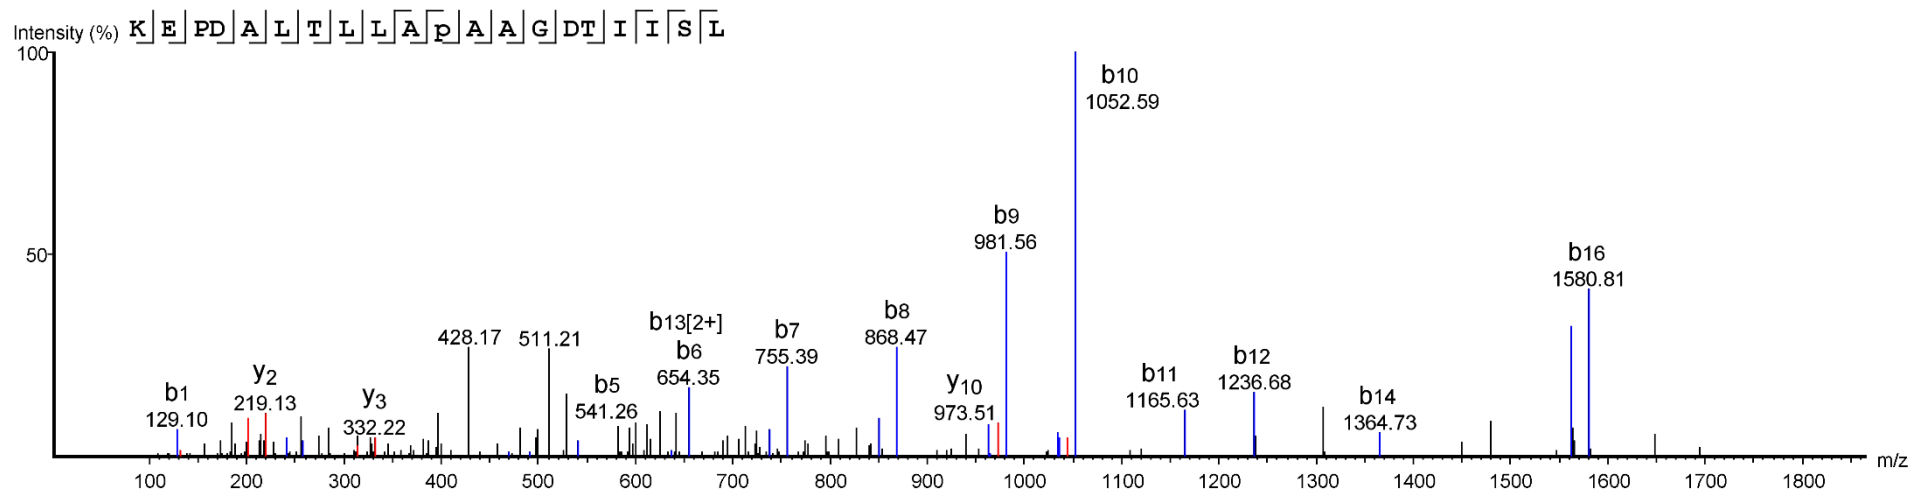

YMT70

Scan #23402

A-061: HIF1A\*<sub>(548-575)</sub>: NPFSTQDLDLDLEALAPYIPADDDDFQLR

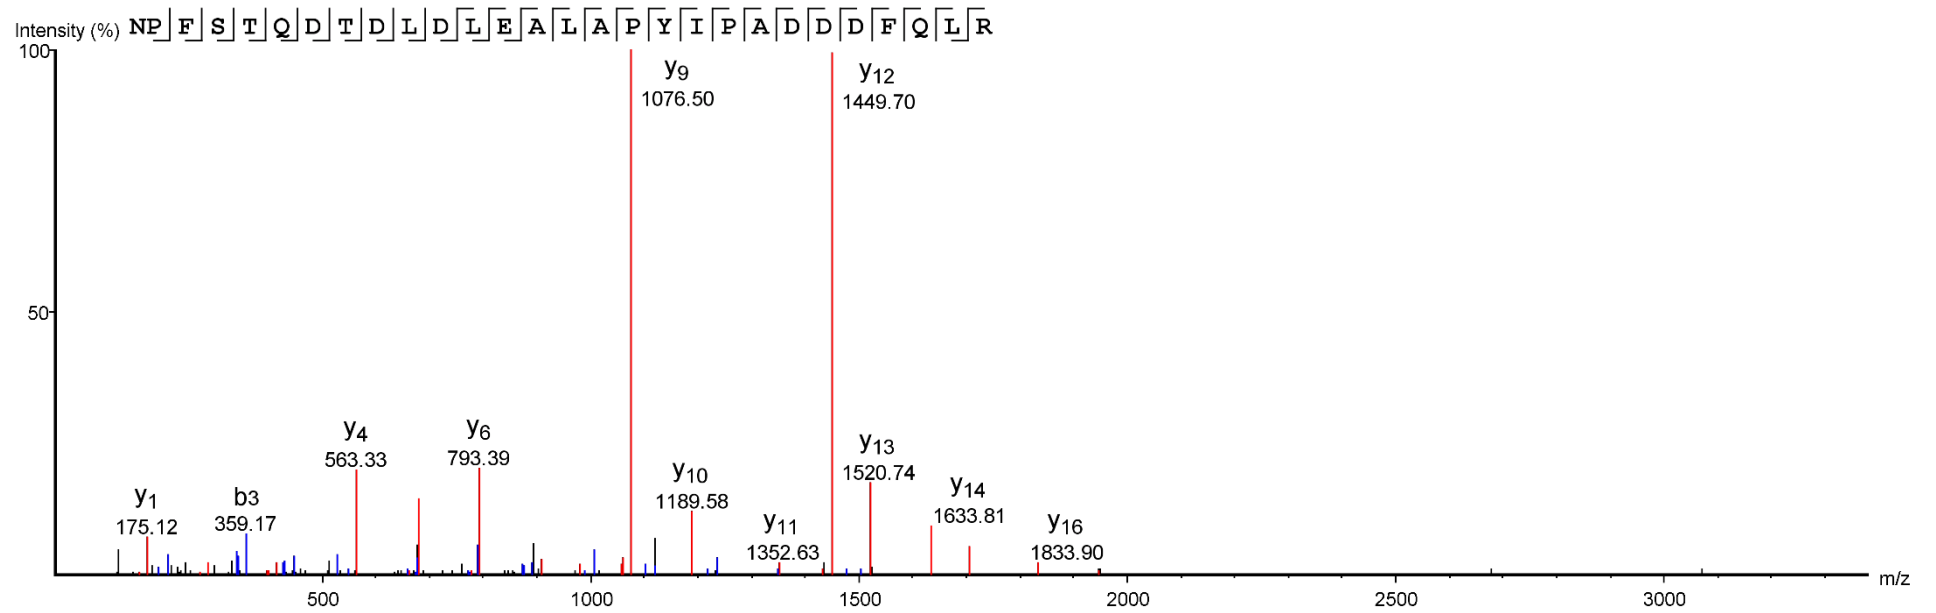

YMT82

Scan #23297

A-062: HIF1A\*<sub>(548-575)</sub>: NPFSTQDLDLDLEALAPYIPADDDDFQLR

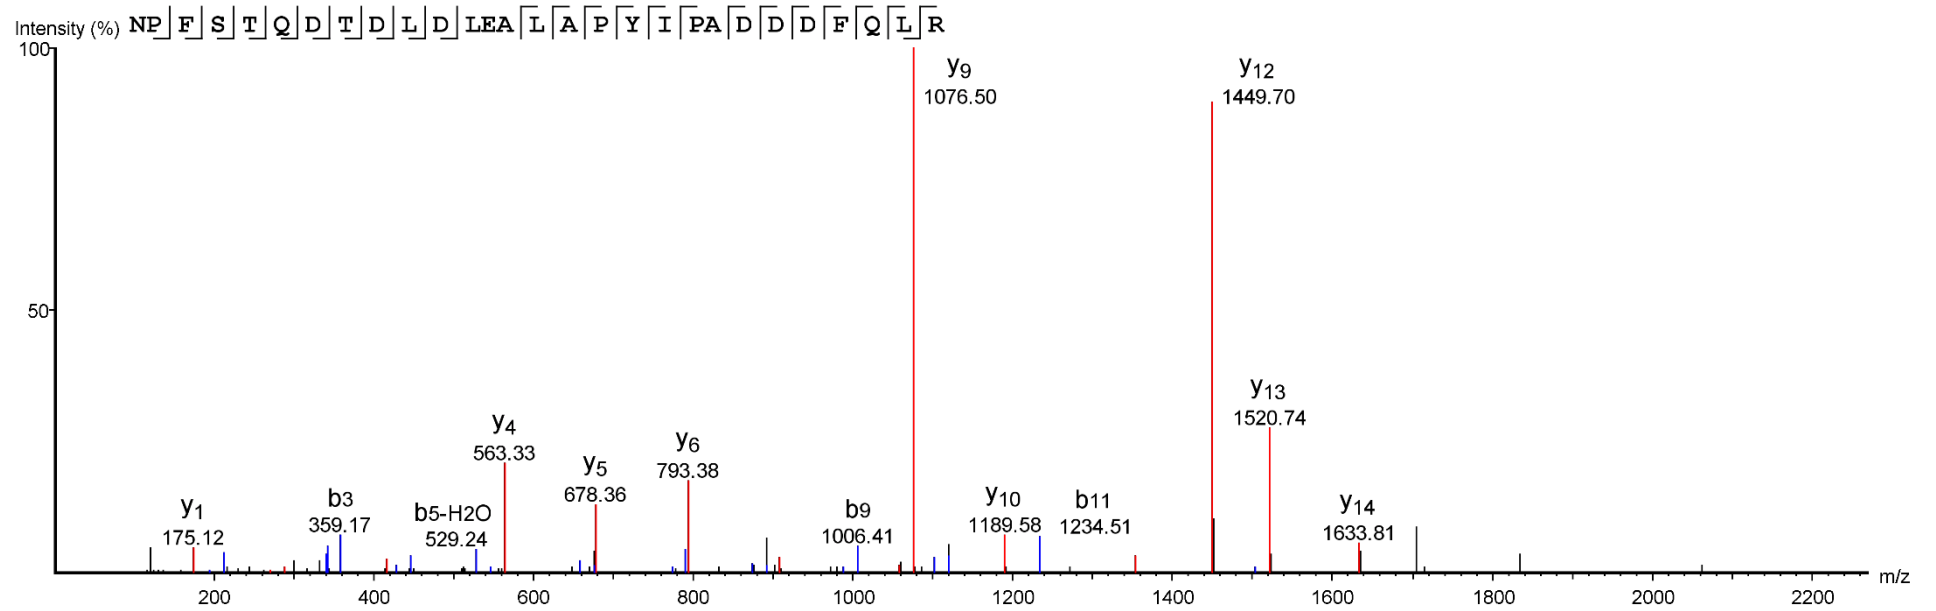

PEP14

Scan #22836

A-063: HIF1A\*<sub>(548-575)</sub>: NPFSTQD TDL DLEALAP(+15.99)YIPADDDDFQLR

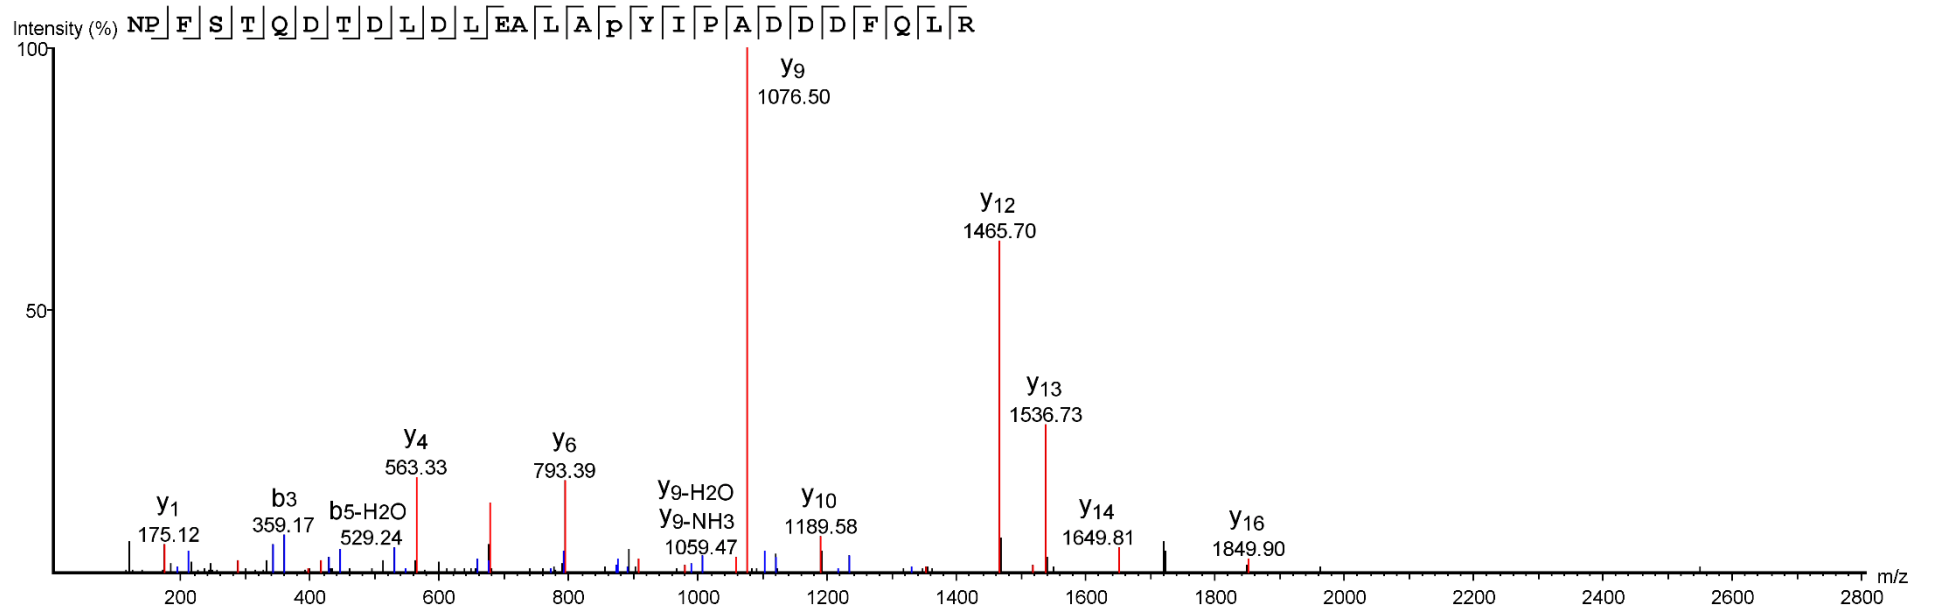

YMT82

Scan #23282



A-064: HIF1A\*<sub>(548-575)</sub>: NPFSTQD**T**LDLEAL**P**(+15.99)YIPADDD**F**QLR

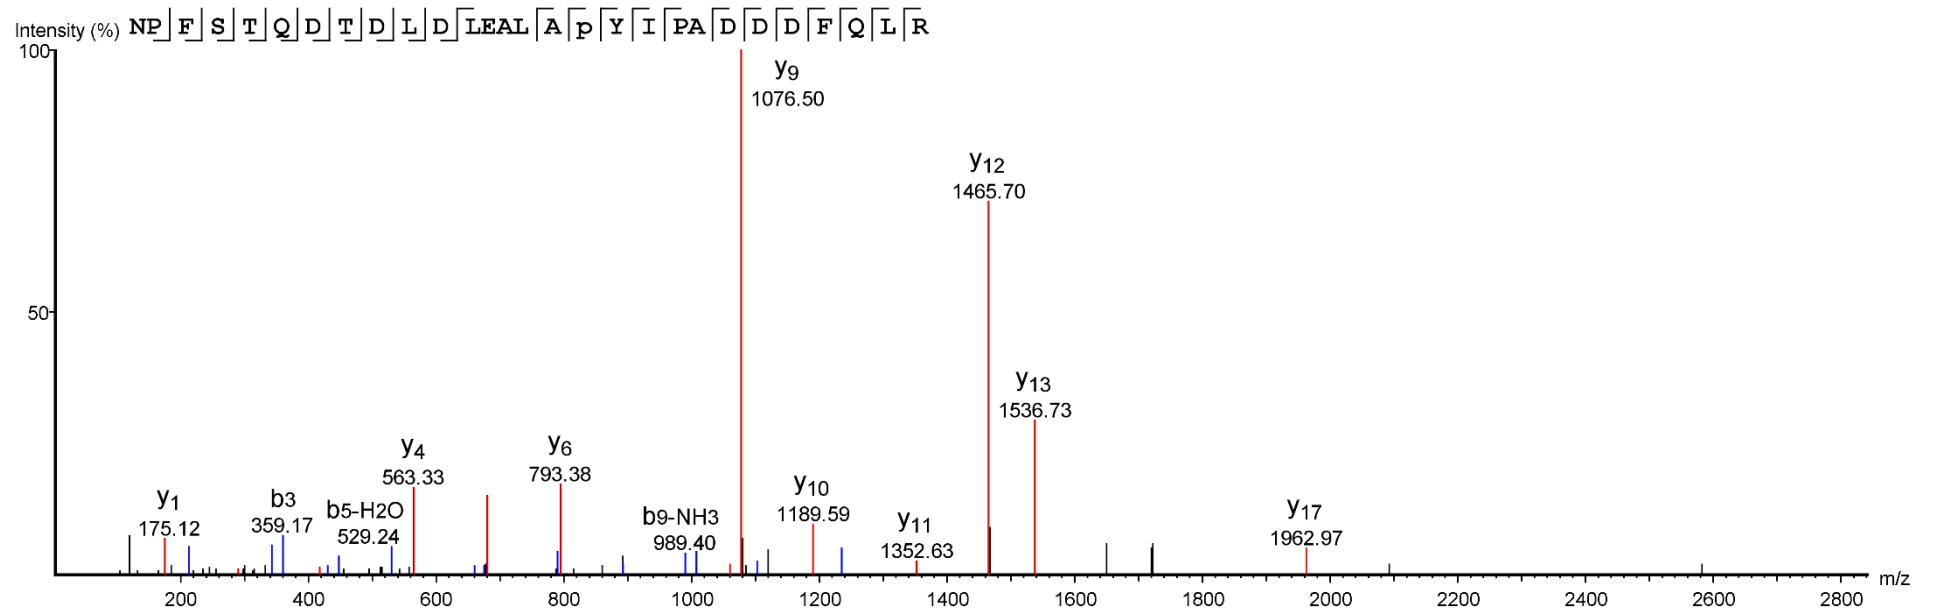

PEP14

Scan #22835

A-065: HIF1A\*<sub>(392-411)</sub>: KEPDALTLLAPAAGDTIISL

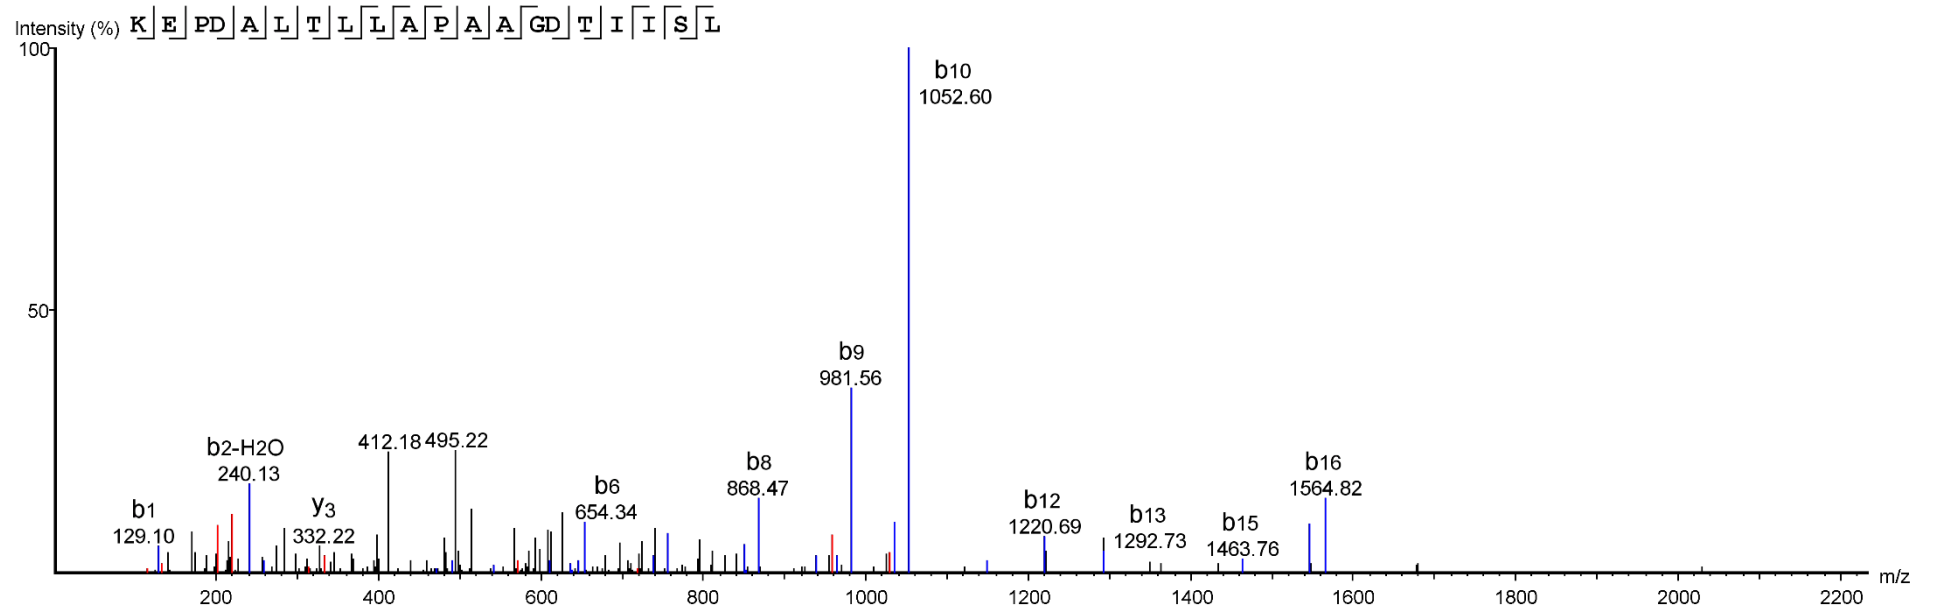

YMT82

Scan #22097

A-066: HIF1A\*<sub>(392-411)</sub>: KEPDALTLLEPAAGDTIISL

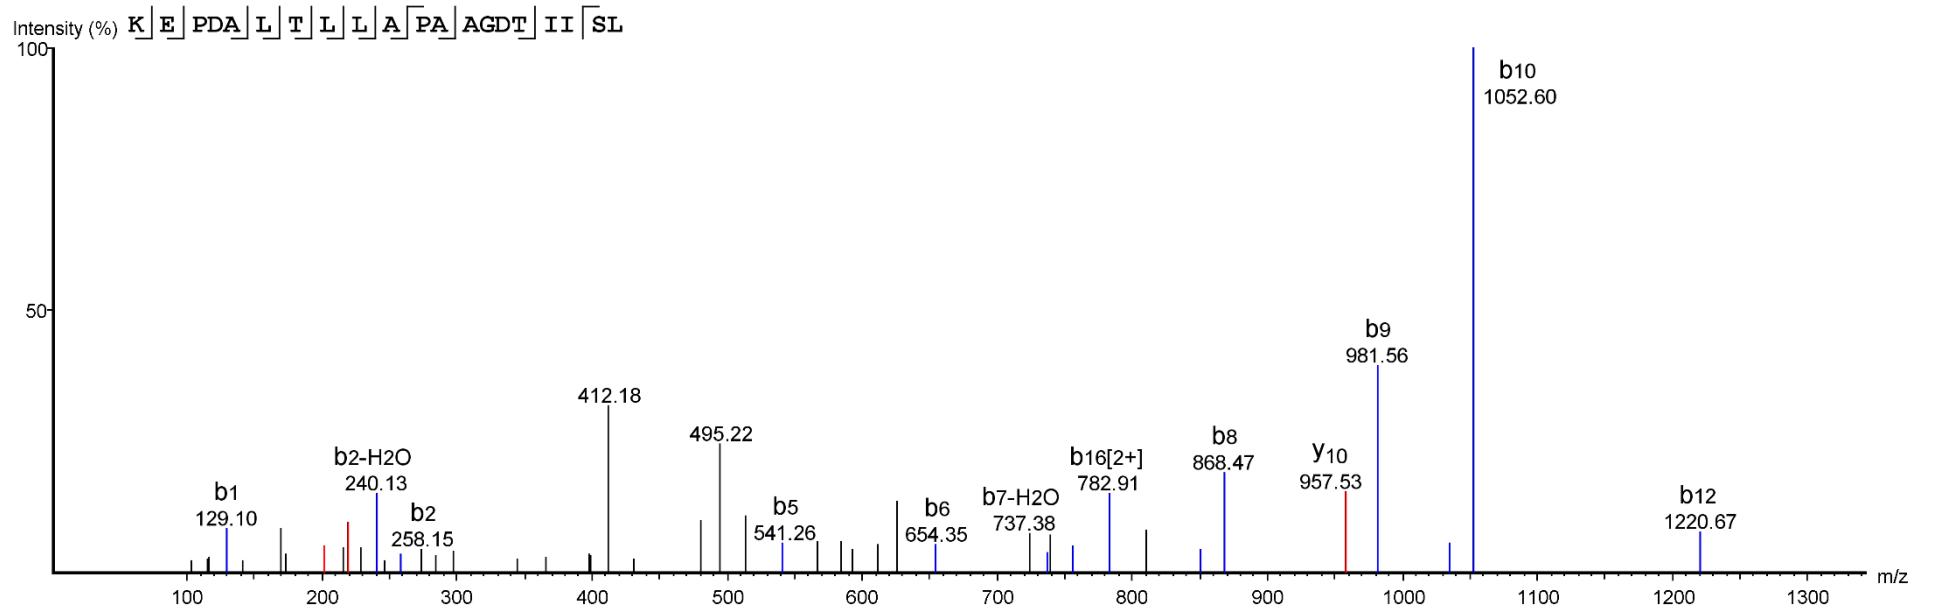

PEP14

Scan #21571

A-067: HIF1A\*<sub>(392-411)</sub>: KEPDALTLLAP(+15.99)AAGDTIISL

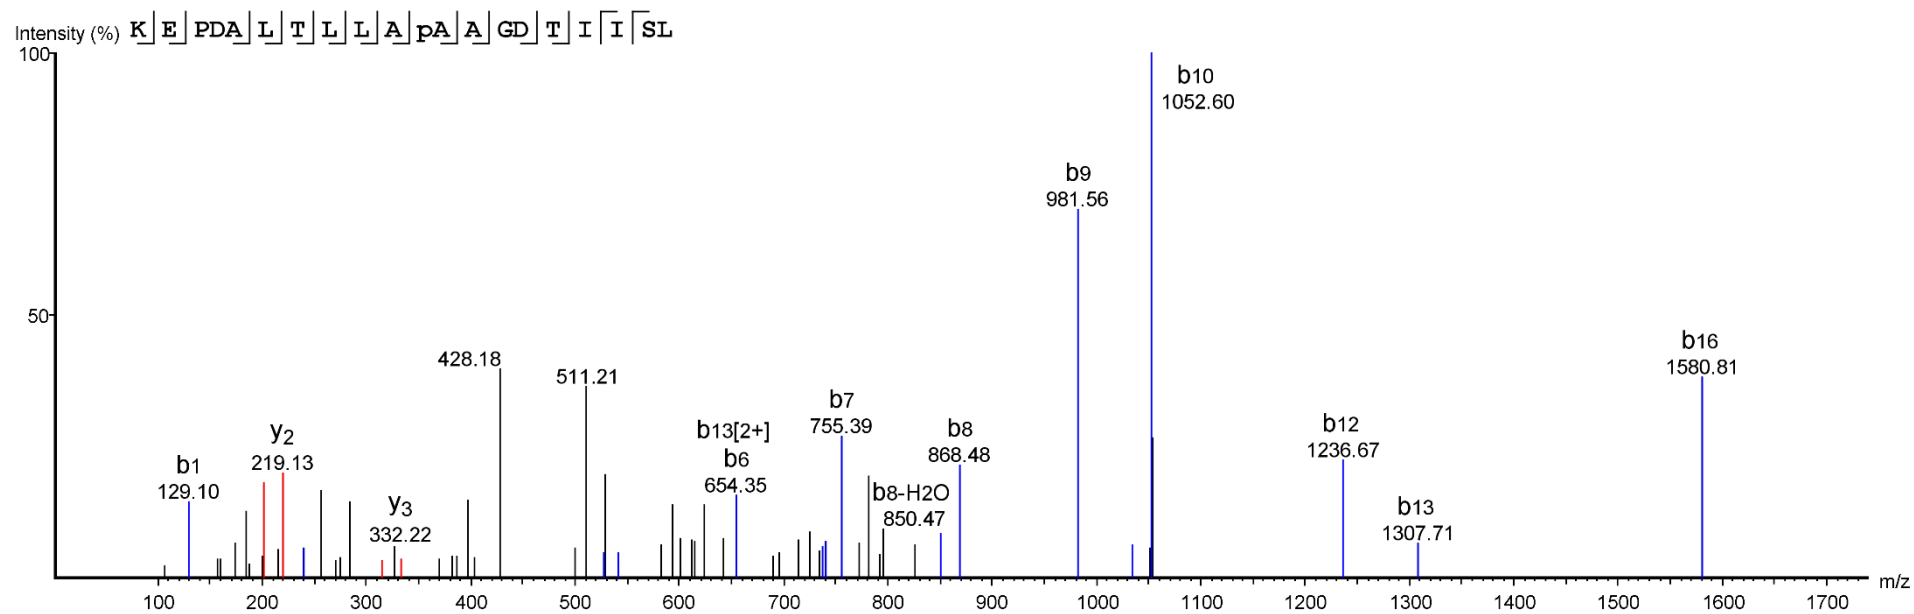

YMT82

Scan #21336

A-068: HIF1A\*<sub>(392-411)</sub>: KEPDALTLLAP(+15.99)AAGDTIISL

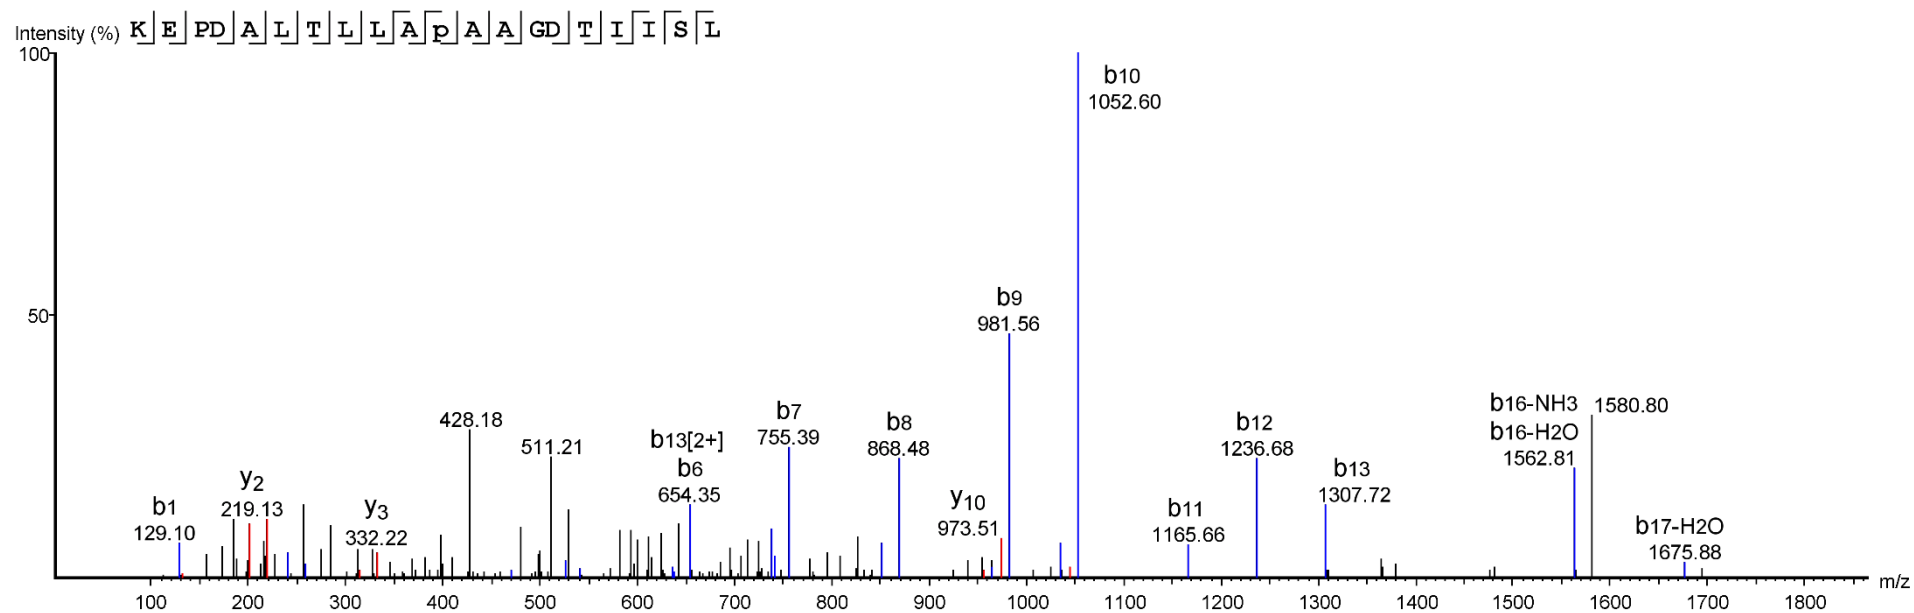

PEP14

Scan #20867

A-069: HIF1A\*<sub>(548-575)</sub>: NPFSTQDSDLLEALAPYIPADDDDFQLR

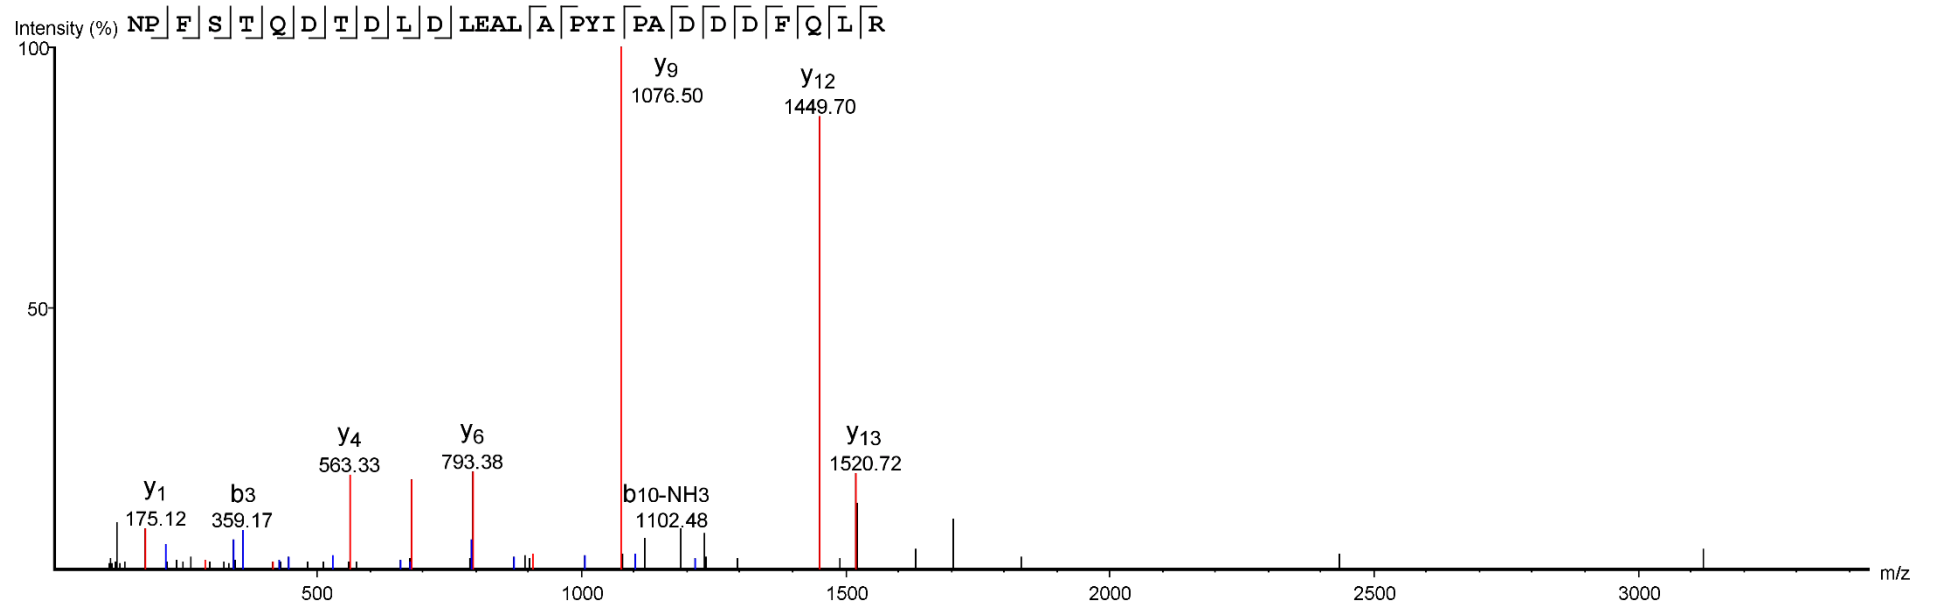

YMT83

Scan #27832

A-070: HIF1A\*<sub>(548-575)</sub>: NPFSTQDSDLLEALAPYIPADDDDFQLR

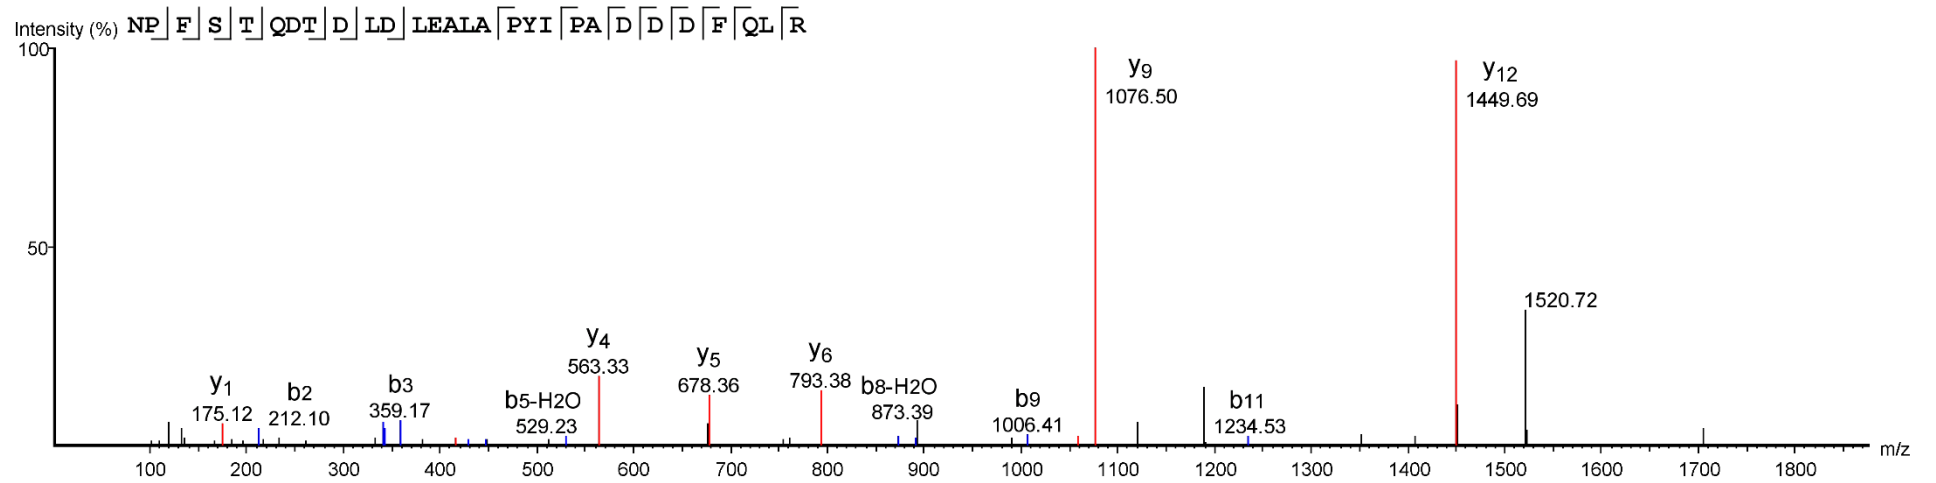

YMT84

Scan #26593

A-071: HIF1A\*<sub>(548-575)</sub>: NPFSTQD~~TDL~~LEALAP(+15.99)YIPADDDDFQLR

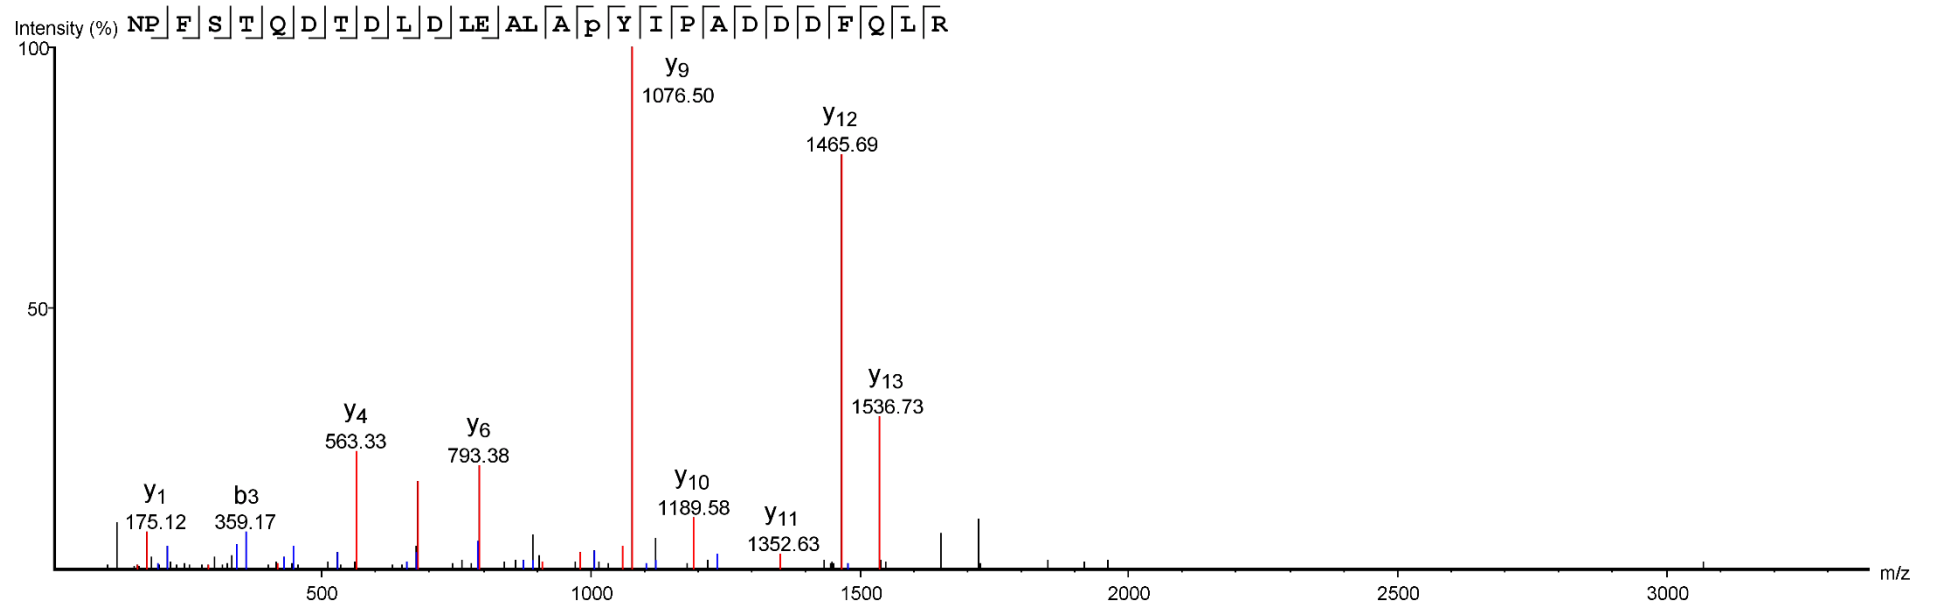

YMT83

Scan #27769



A-072: HIF1A\*<sub>(548-575)</sub>: NPFSTQD**TDL**DLEAL**P(+15.99)**YIPADDDDFQLR

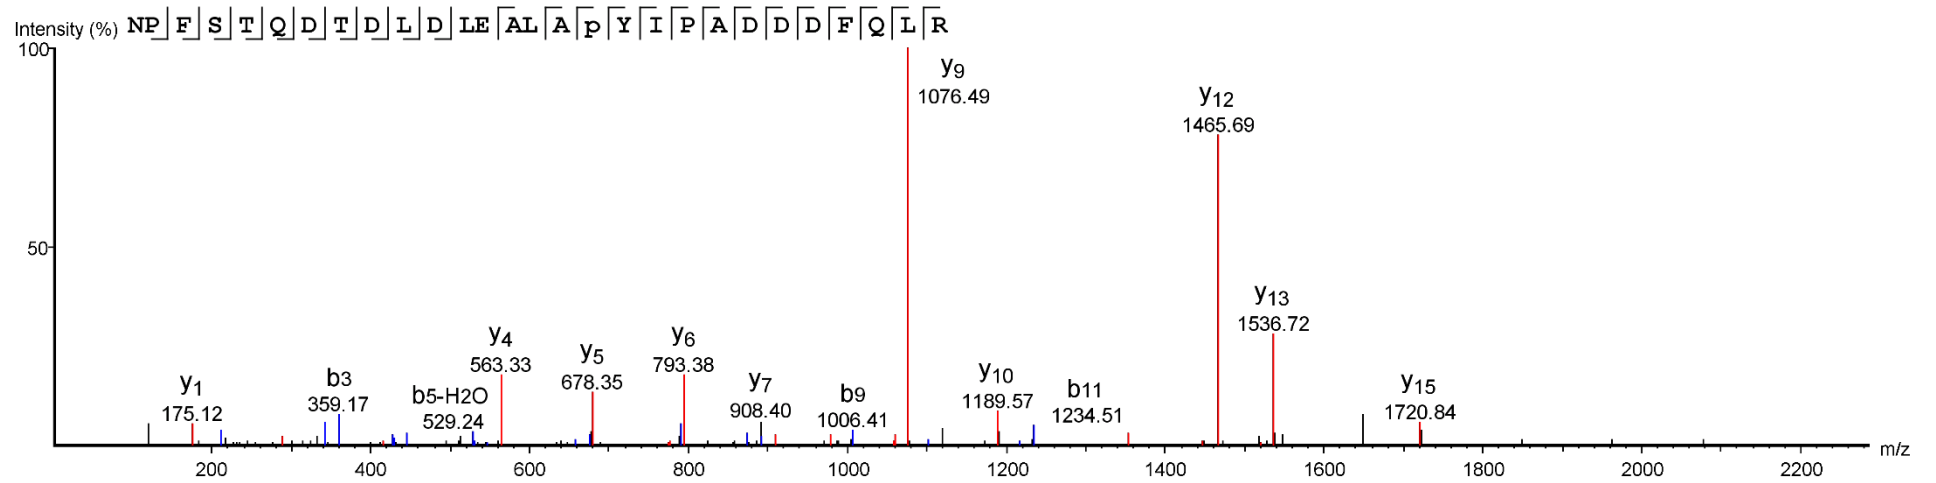

YMT84

Scan #26544

A-073: HIF1A\*<sub>(392-403)</sub>: KEPDALTLLAPA

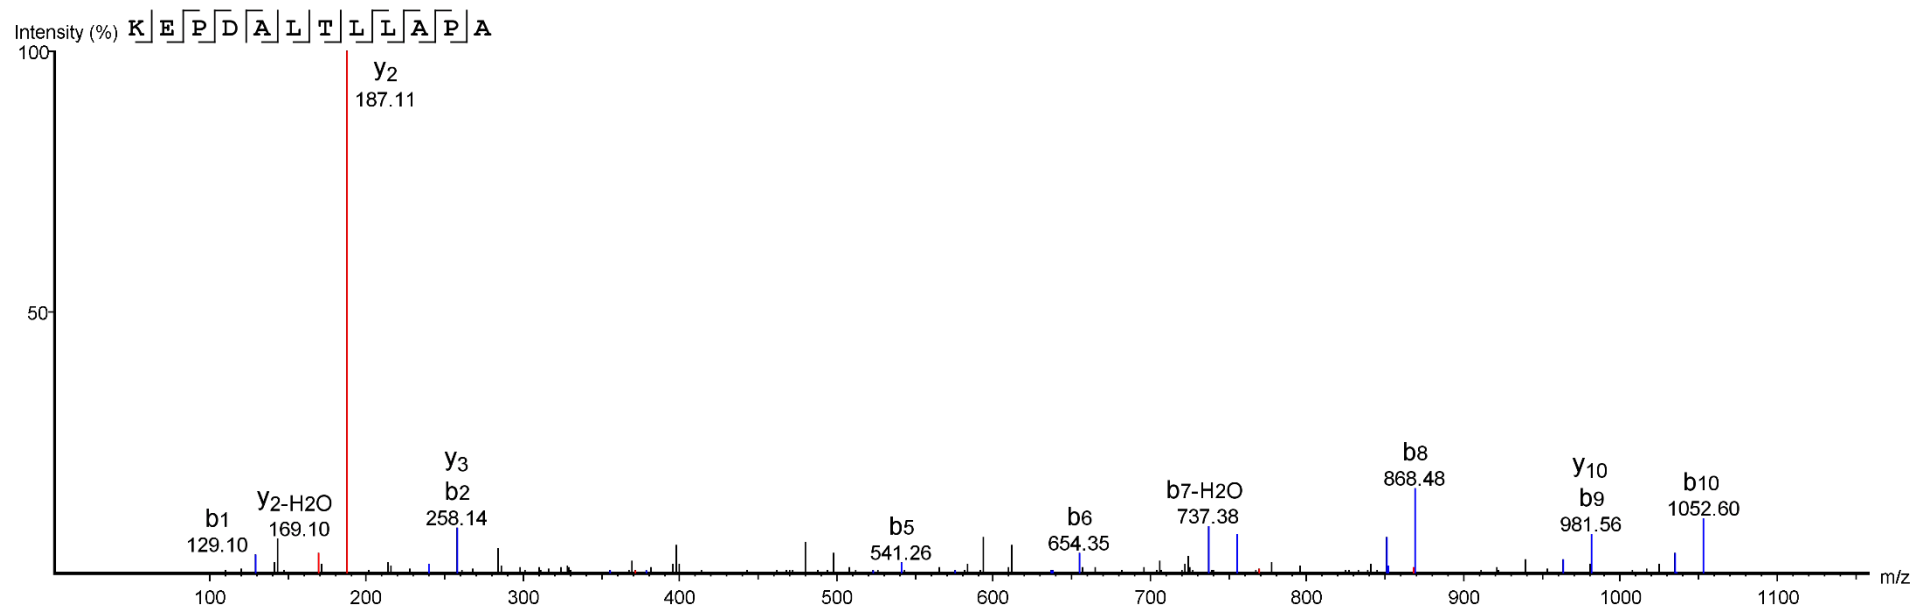

YMT83

Scan #19706

A-074: HIF1A\*<sub>(392-403)</sub>: KEPDALTLLAPA

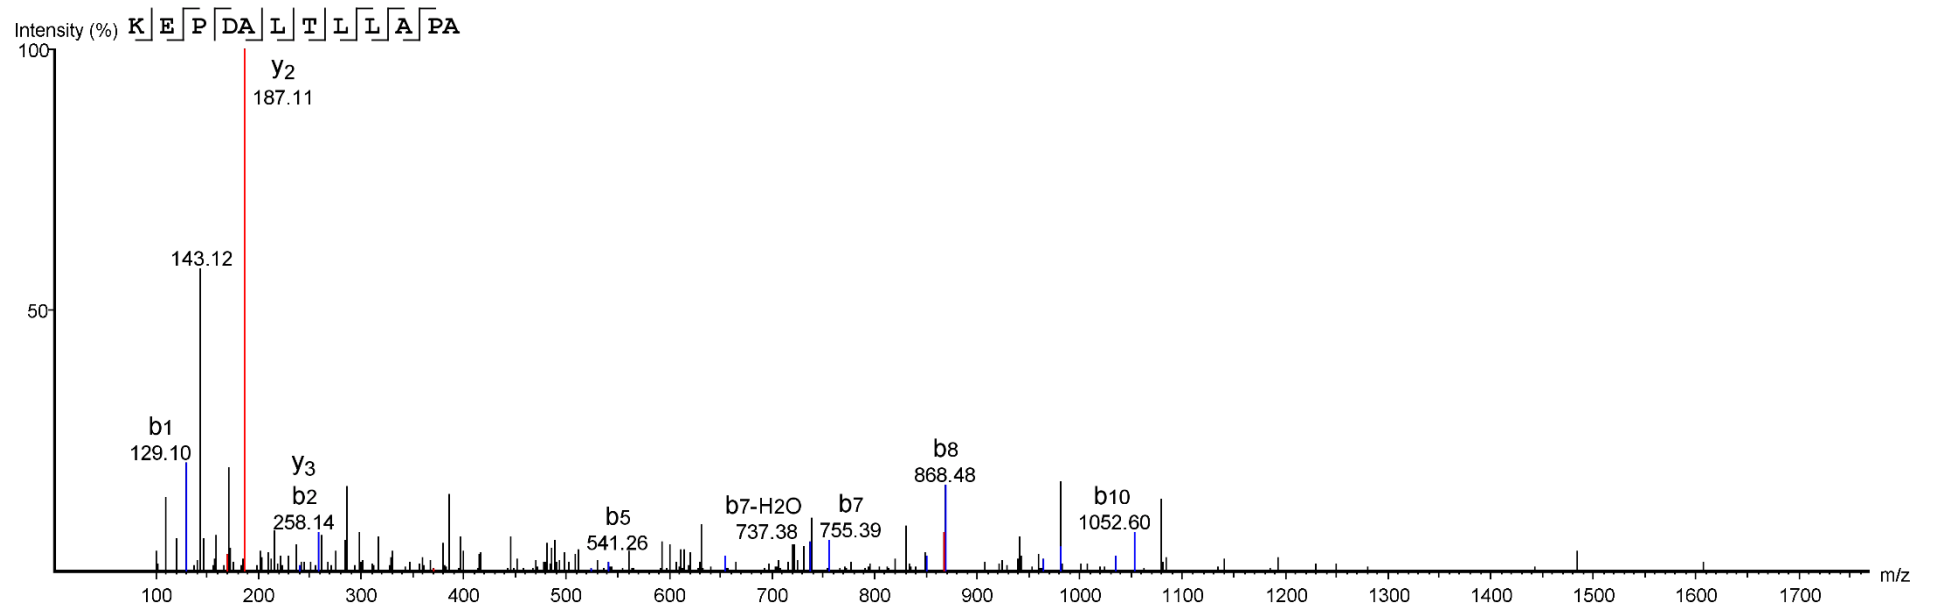

YMT84

Scan #18811

A-075: HIF1A\*<sub>(392-403)</sub>: KEPDALTL LAP(+15.99)A

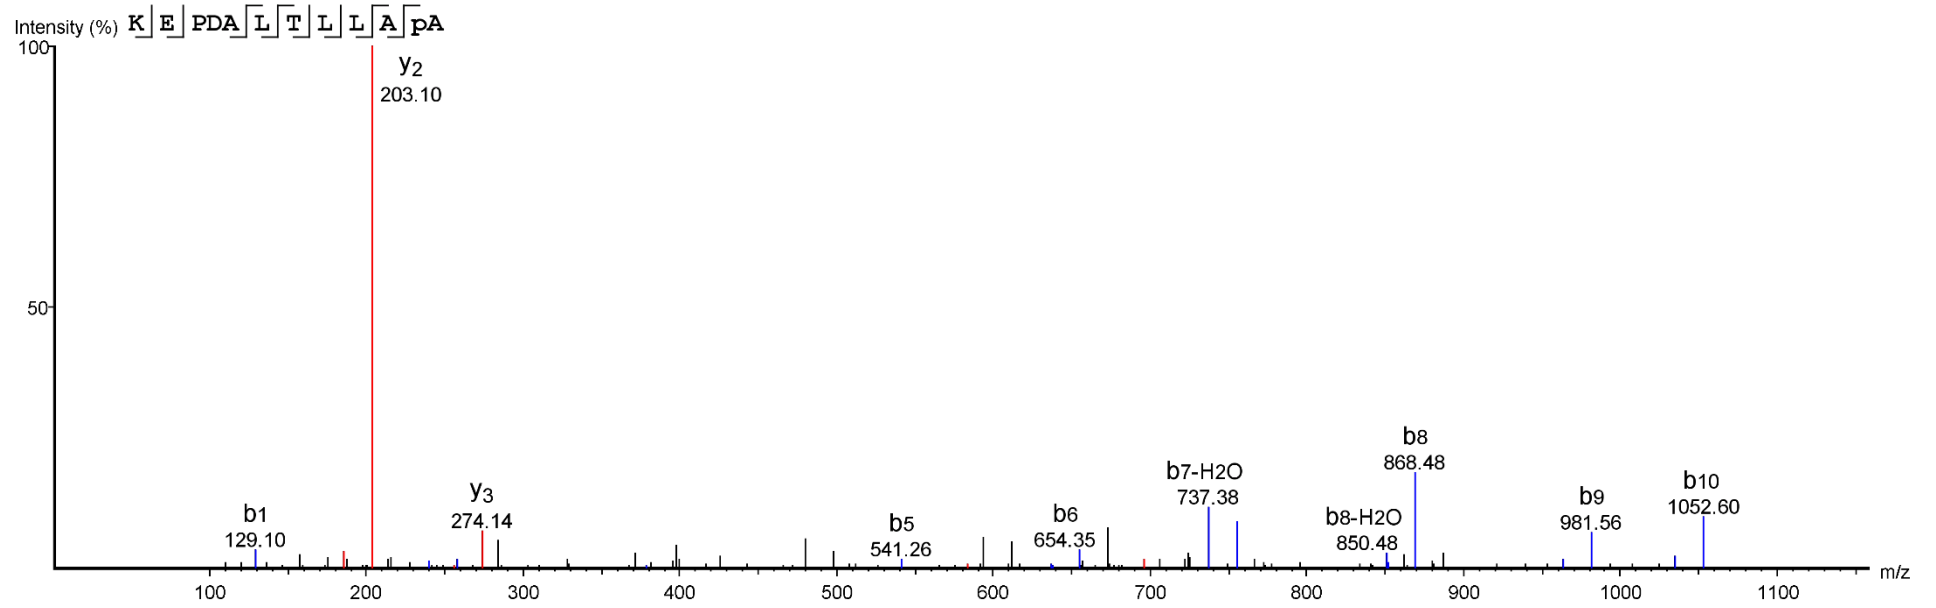

YMT83

Scan #18125

A-076: HIF1A\*<sub>(392-403)</sub>: KEPDALTLLAP(+15.99)A

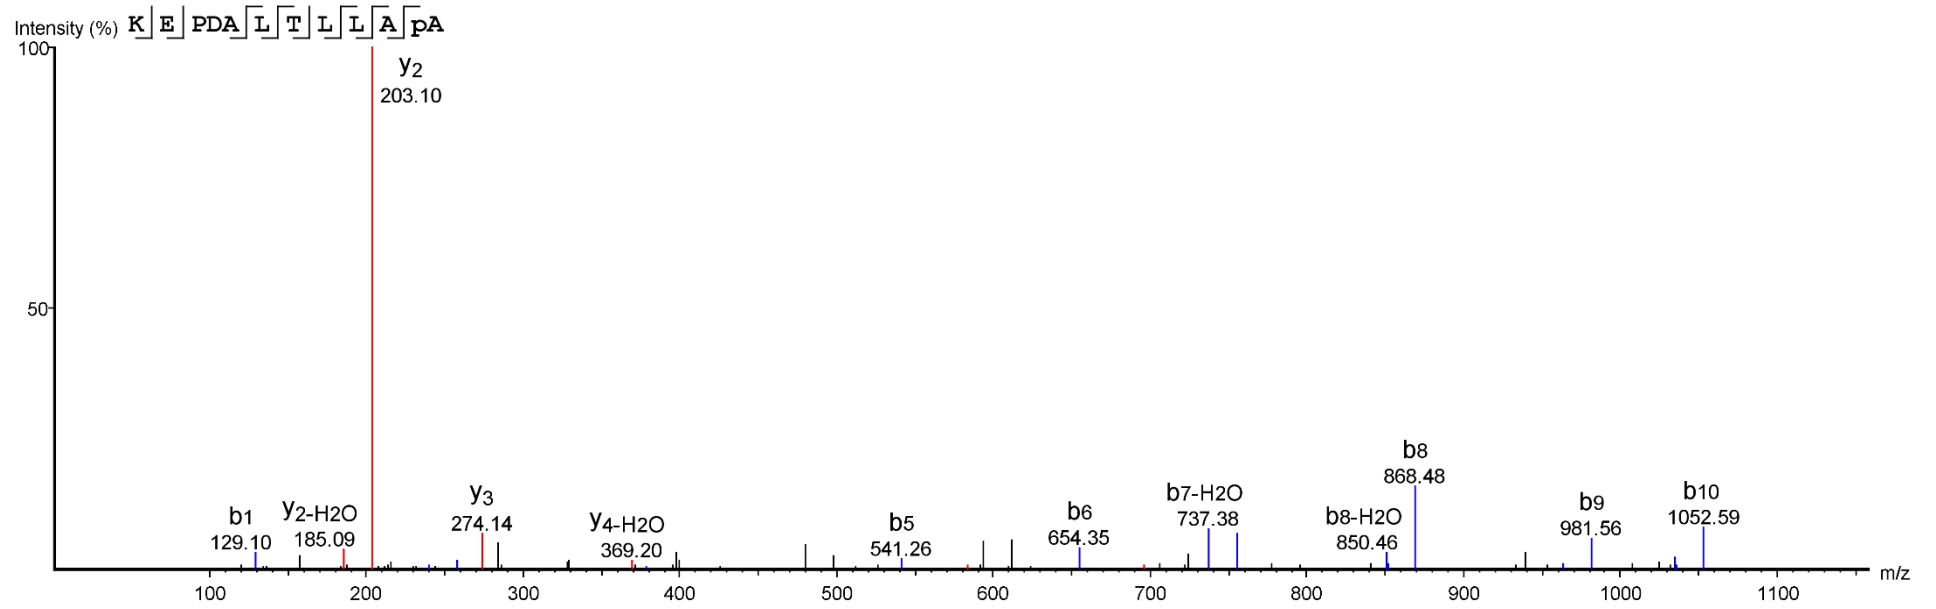

YMT84

Scan #17426

A-077: HIF1A\*<sub>(548-575)</sub>: NPFSTQD TDL DLEALAPYIPADDDDFQLR

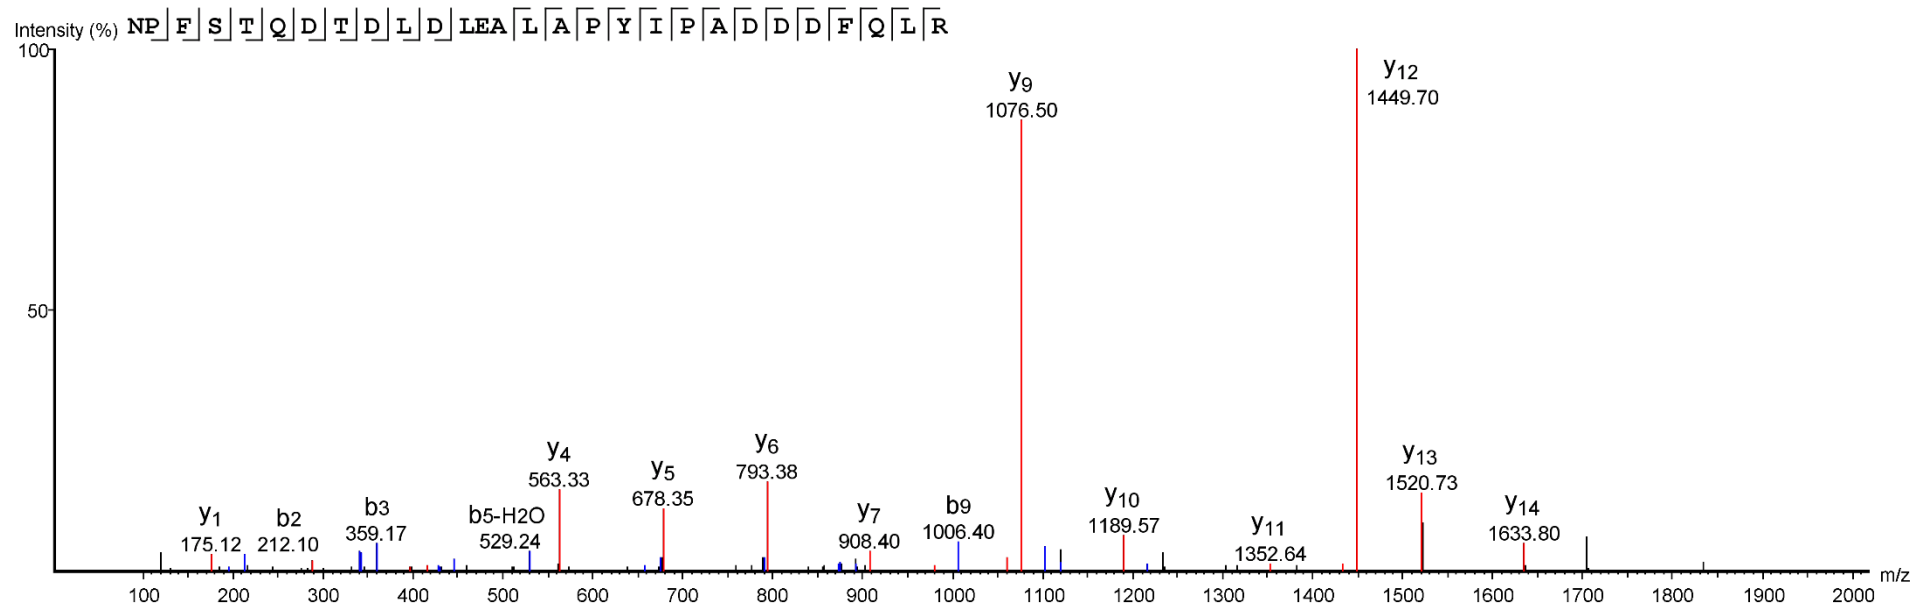

YMT86

Scan #28863

A-078: HIF1A\*<sub>(548-575)</sub>: NPFSTQD TDL DLEALAPYIPADDDDFQLR

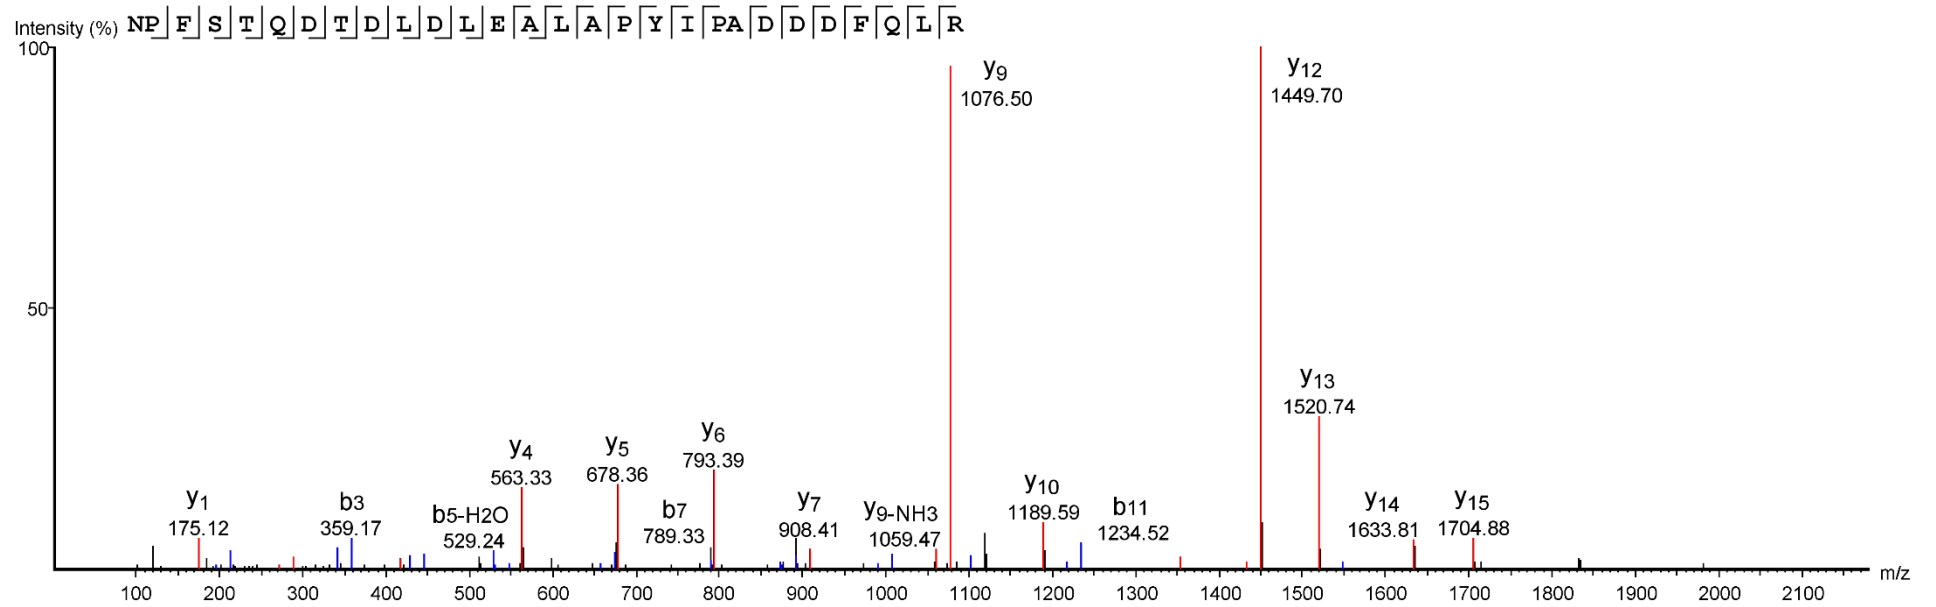

YMT88

Scan #27079

A-079: HIF1A\*<sub>(548-575)</sub>: NPFSTQD TDL DLEAL A pY I P A D D D F Q L R

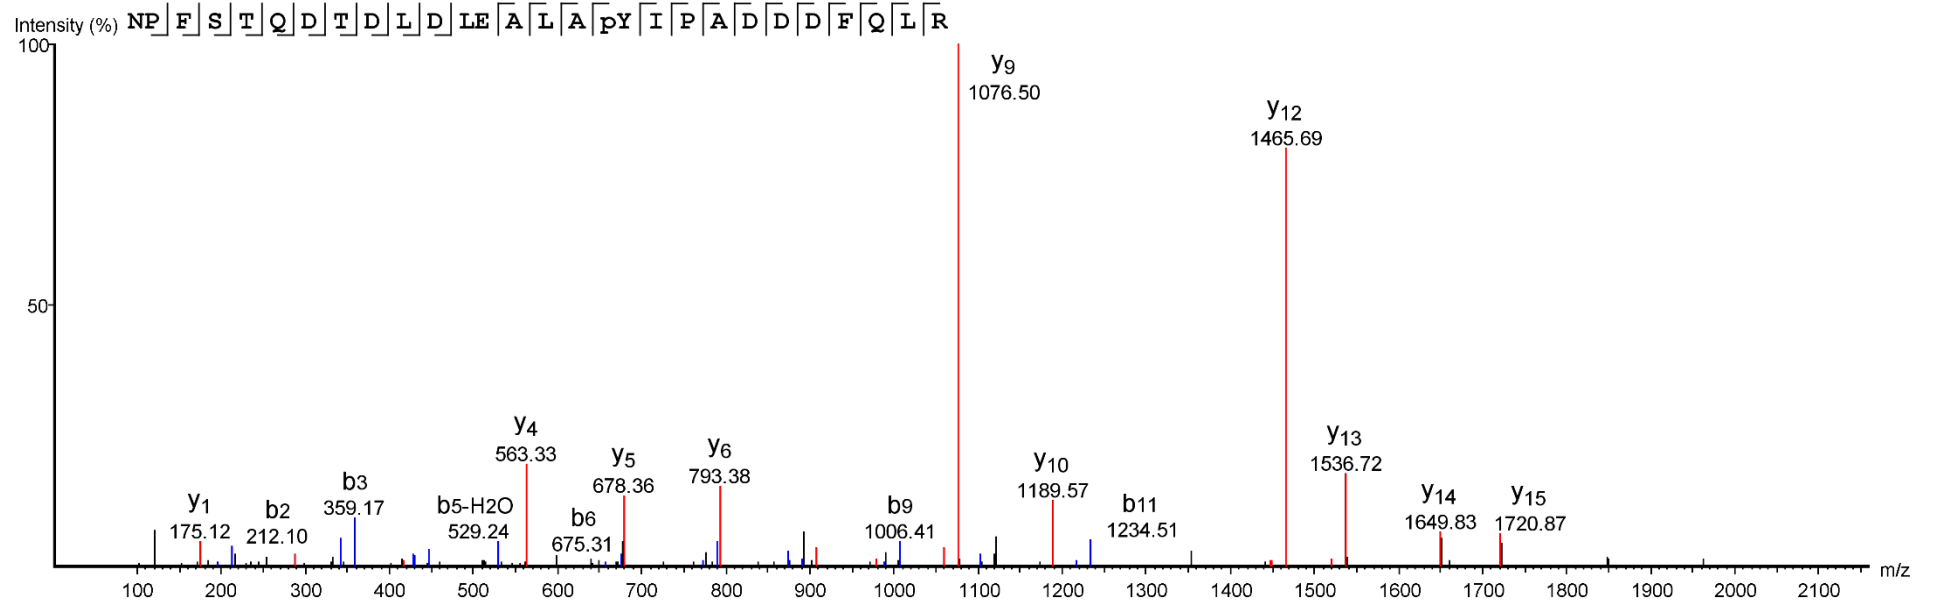

YMT86

Scan #28815



A-080: HIF1A\*<sub>(548-575)</sub>: NPFSTQD~~T~~LDLEALP(+15.99)YIPADD~~D~~DFQLR

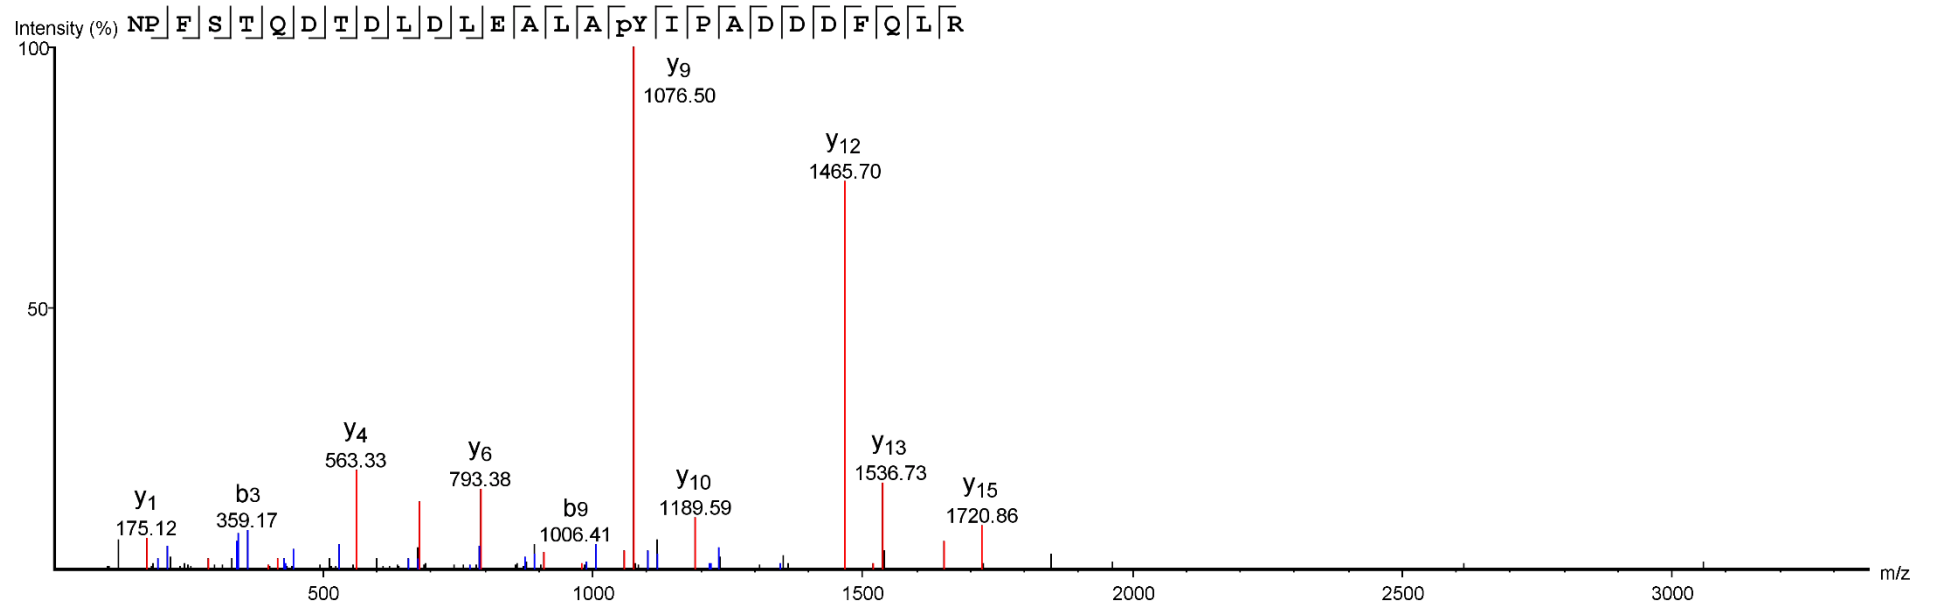

YMT88

Scan #27030

A-081: HIF1A\*<sub>(392-403)</sub>: KEPDALTLLAPA

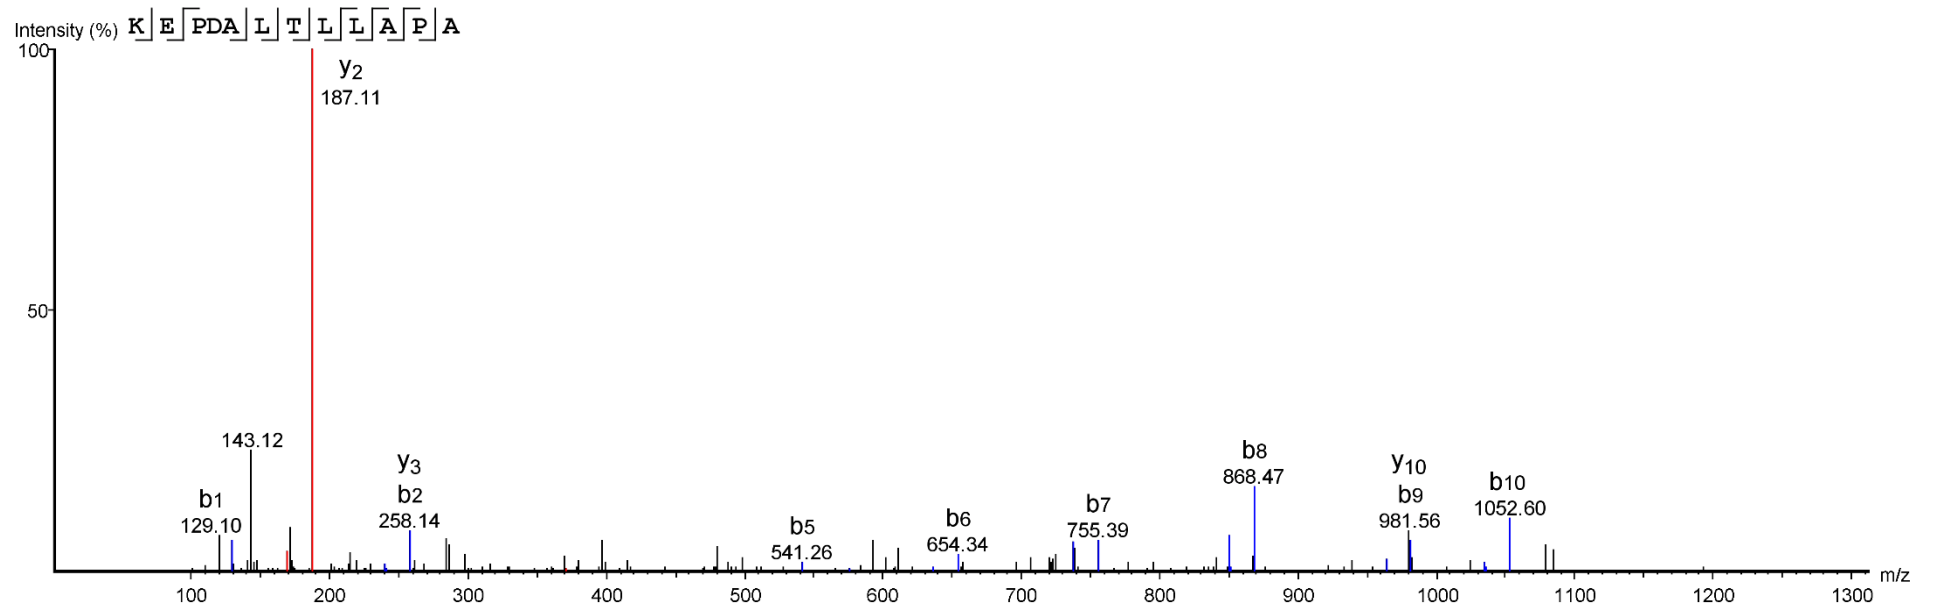

YMT86

Scan #20659

A-082: HIF1A\*<sub>(392-403)</sub>: KEPDALTL<sup>A</sup>LPA

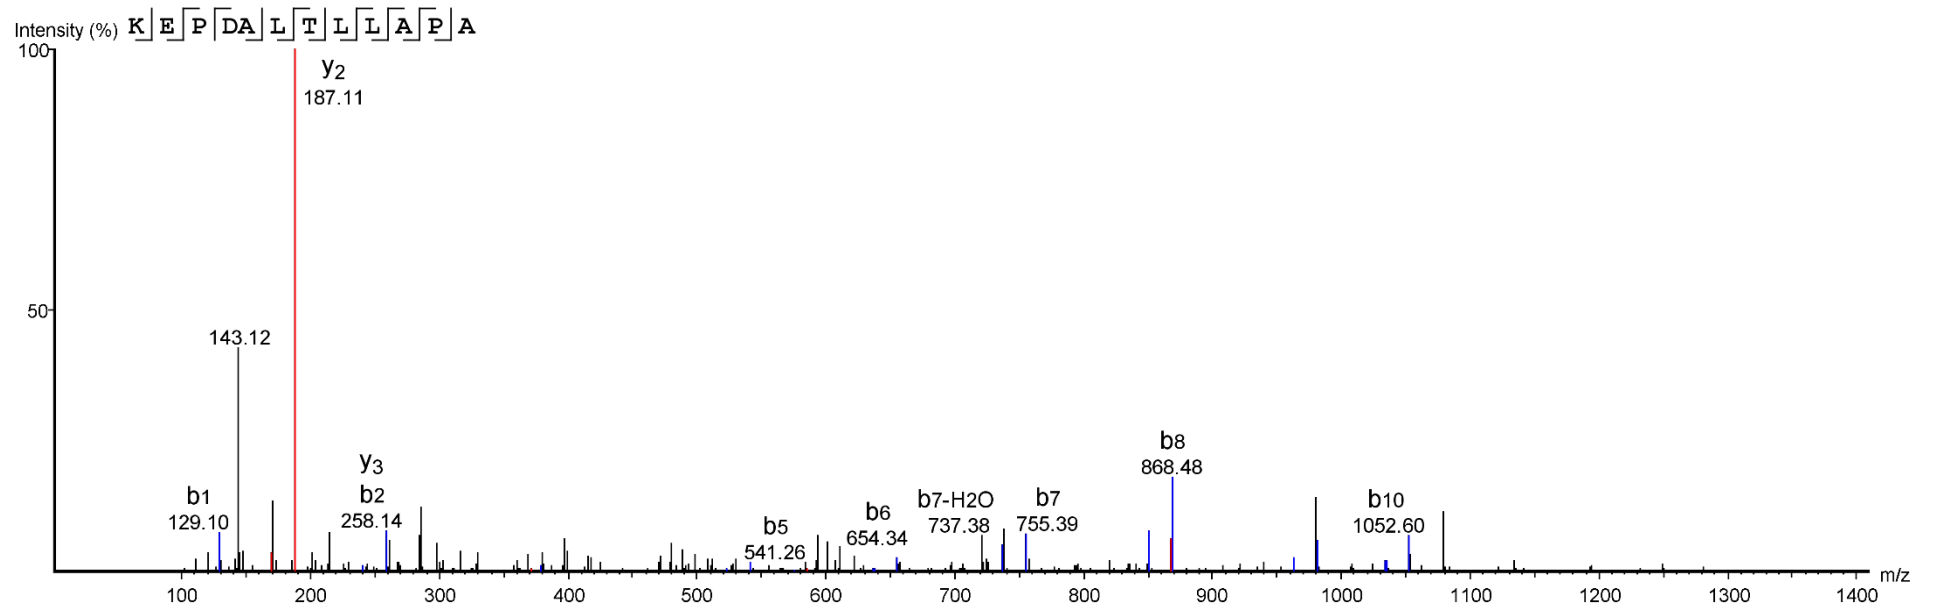

YMT88

Scan #19243

A-083: HIF1A\*<sub>(392-403)</sub>: KEPDALTLLAP(+15.99)A

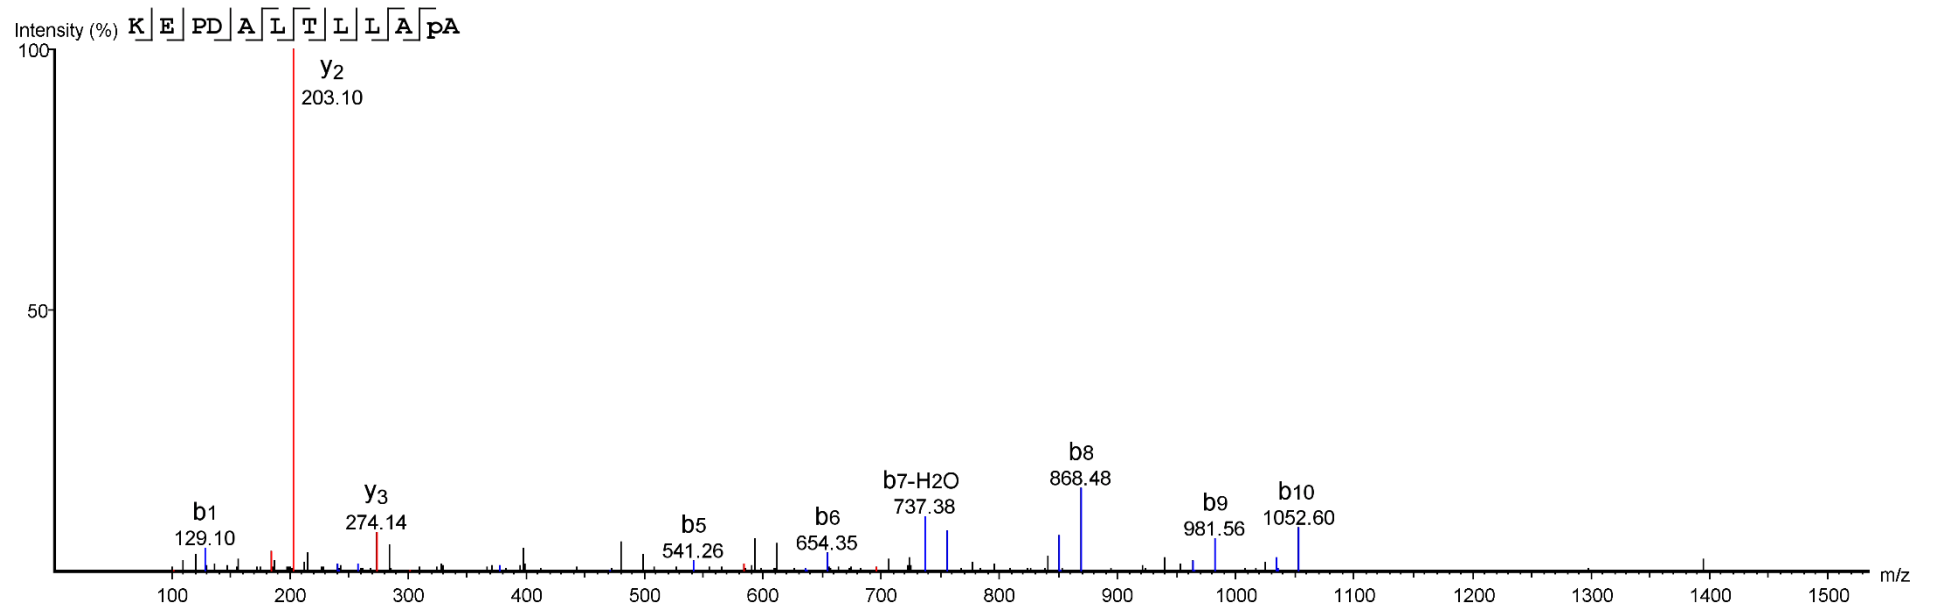

YMT86

Scan #19065

A-084: HIF1A\*<sub>(392-403)</sub>: KEPDALTLLAP(+15.99)A

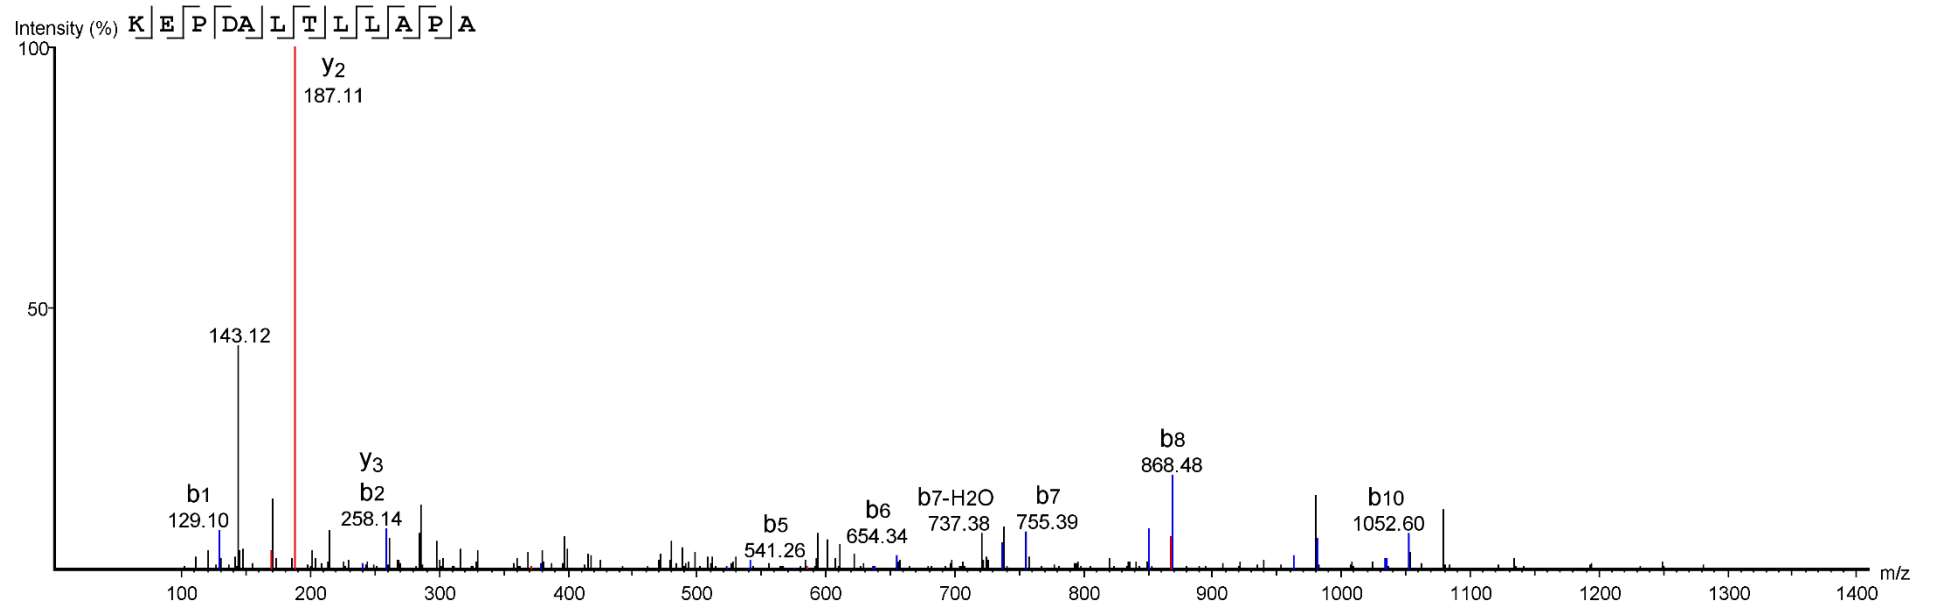

YMT88

Scan #17777

A-085: HIF1A\*<sub>(548-575)</sub>: NPFSTQDLDLDLEALAPYIPADDDDFQLR

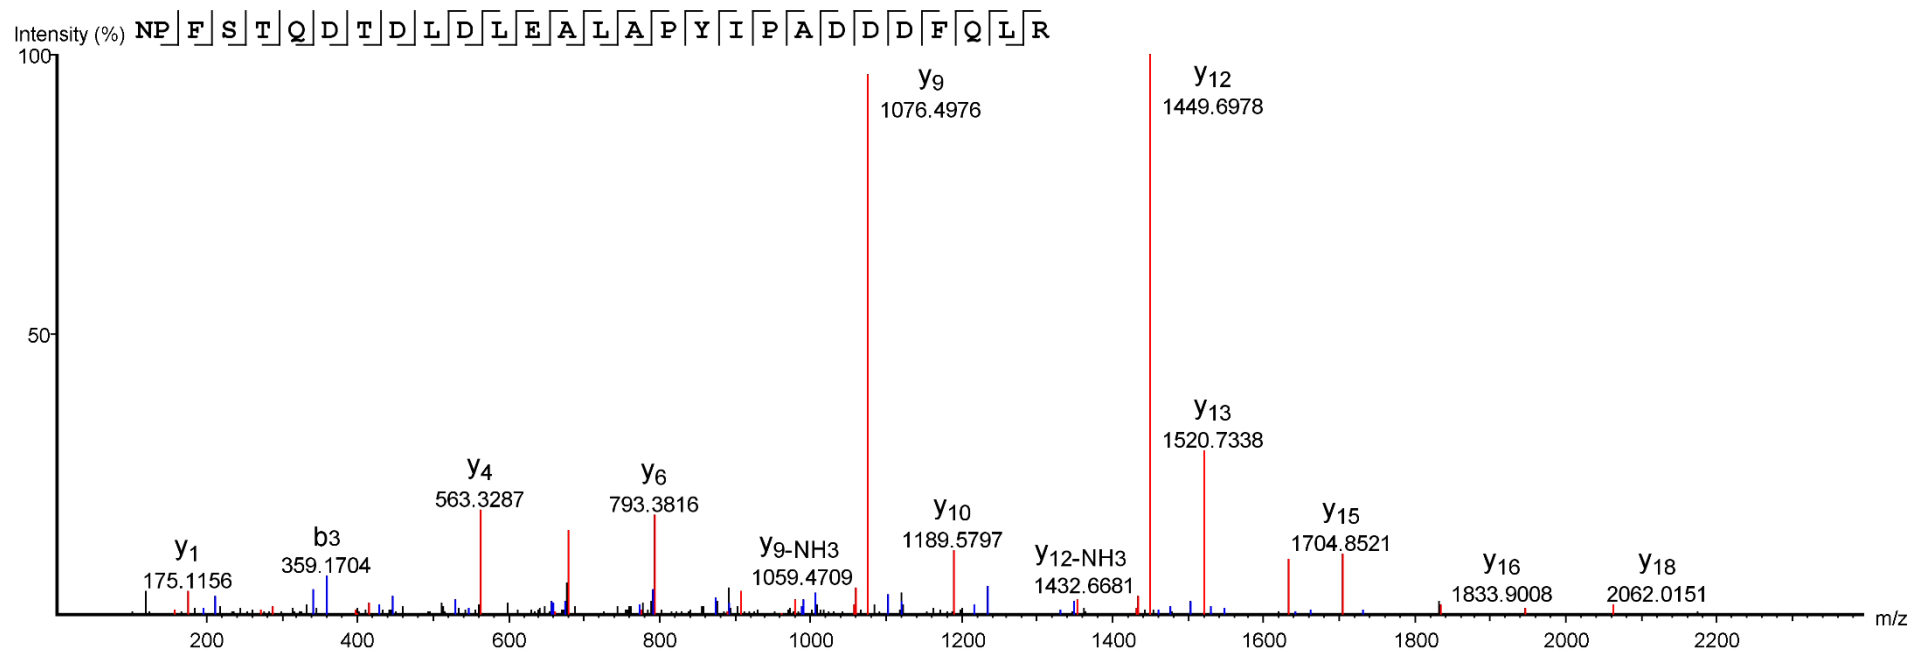

YMT109

Scan #27280

A-086: HIF1A\*<sub>(548-575)</sub>: NPFSTQDLDLDLEALAPYIPADDDDFQLR

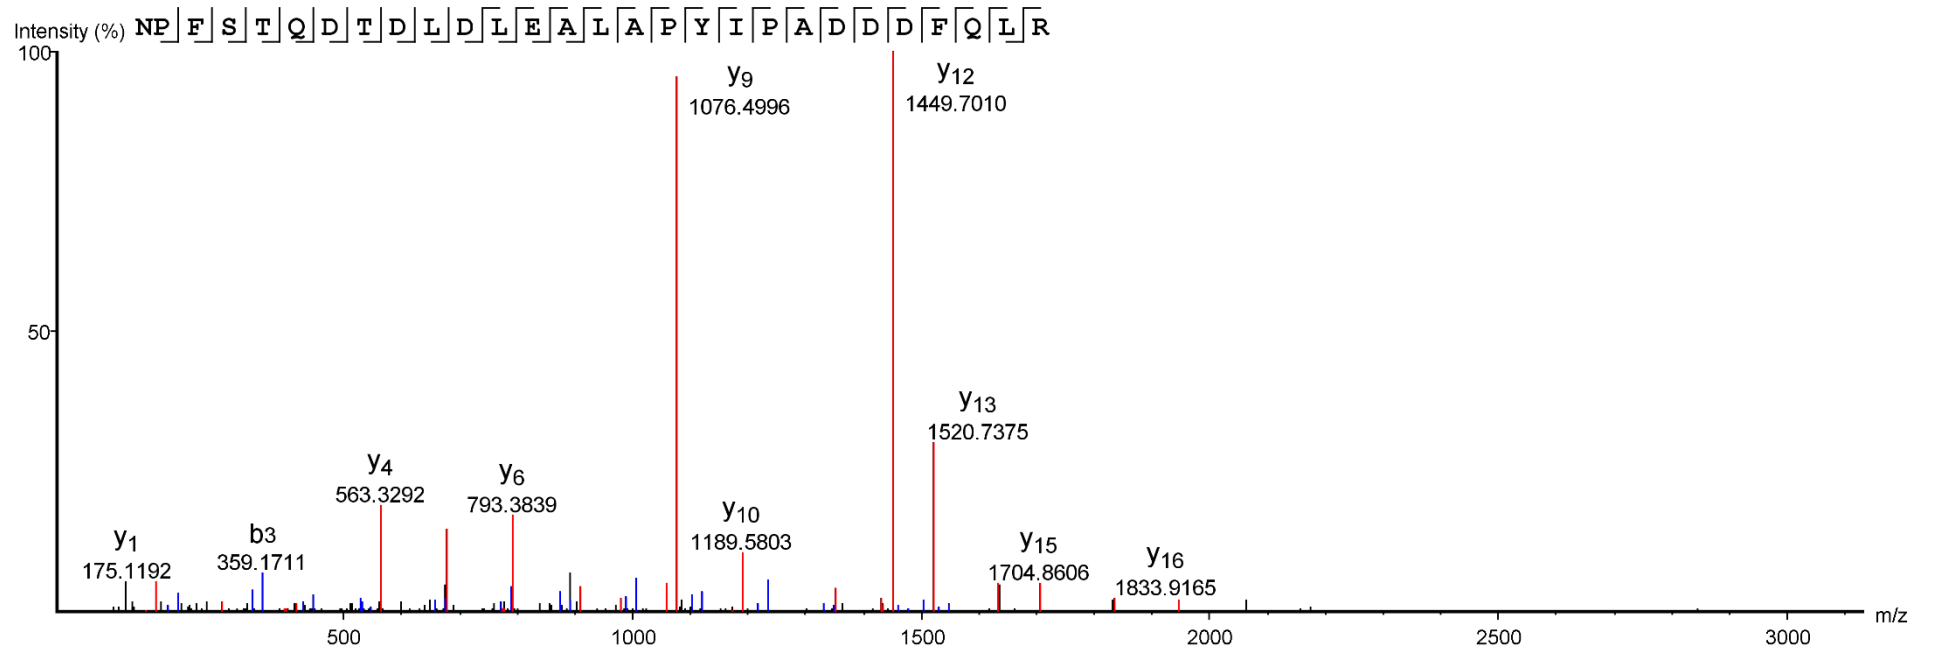

YMT110

Scan #27304

A-087: HIF1A\*<sub>(548-575)</sub>: NPFSTQD**TDLDLEALAP**(+15.99)YIPADDD**DFQLR**

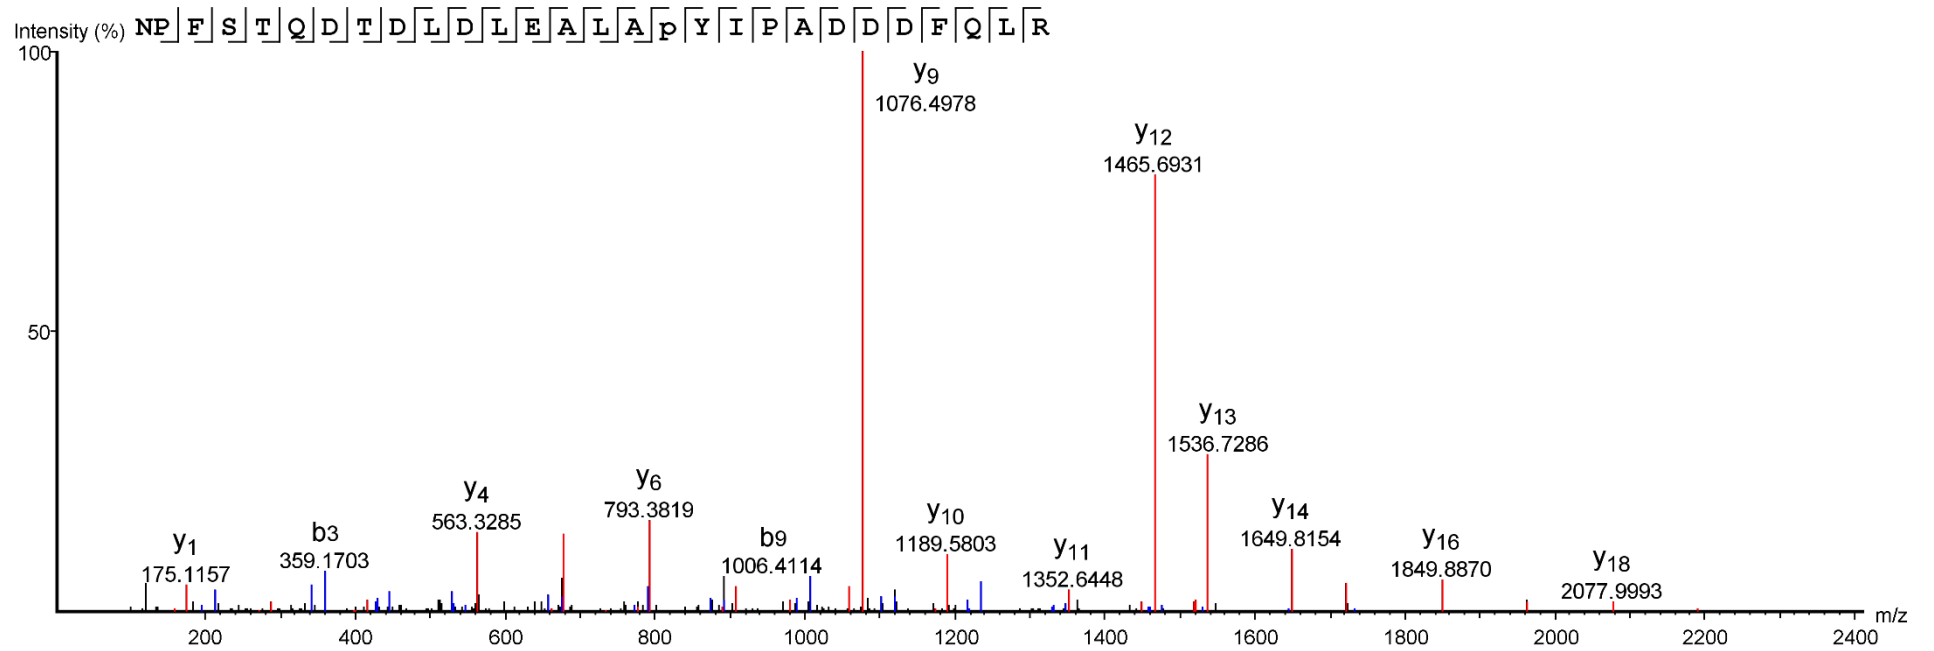

YMT109

Scan #27248



A-088: HIF1A\*<sub>(548-575)</sub>: NPFSTQD<sup>15</sup>TDLDLEALP(+15.99)YIPADDDDFQLR

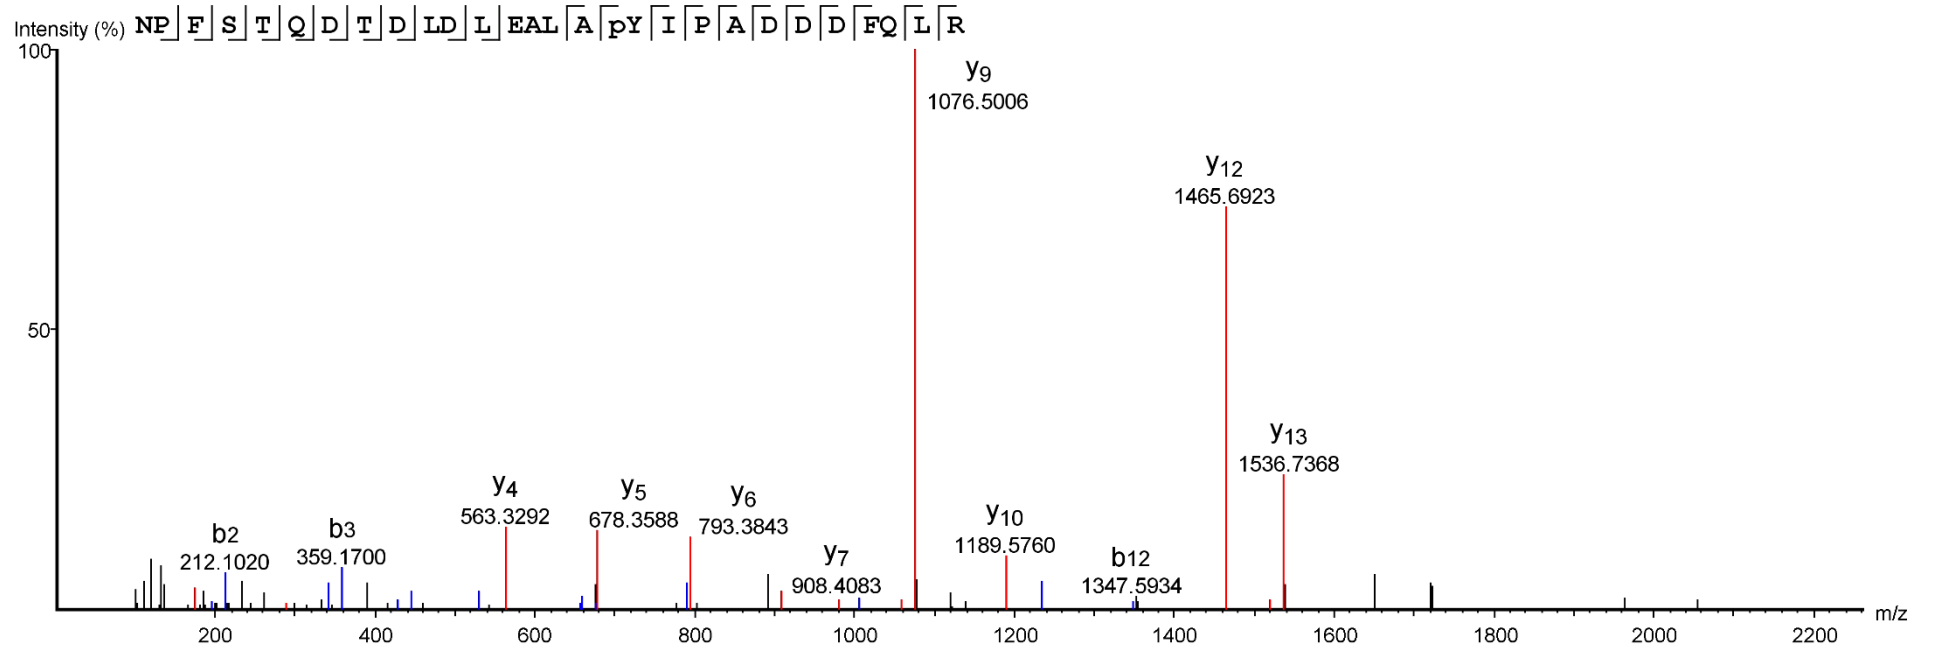

YMT110

Scan #27354

A-089: HIF1A\*<sub>(392-411)</sub>: KEPDALTLLA**P**AAGDTIISL

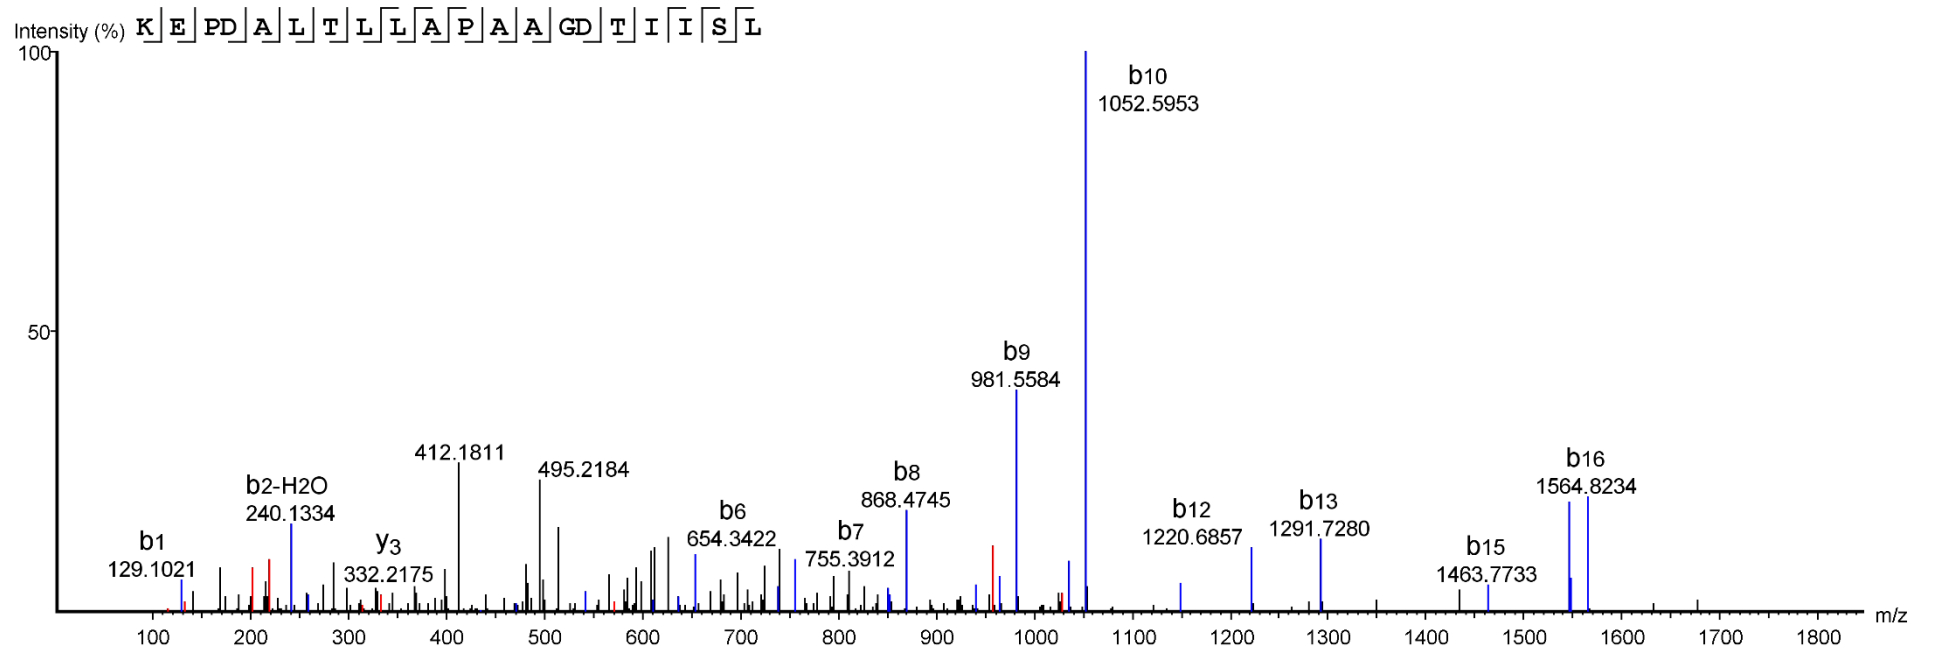

YMT109

Scan #26030

A-090: HIF1A\*<sub>(392-411)</sub>: KEPDALTLLA**PA**AGDTIISL

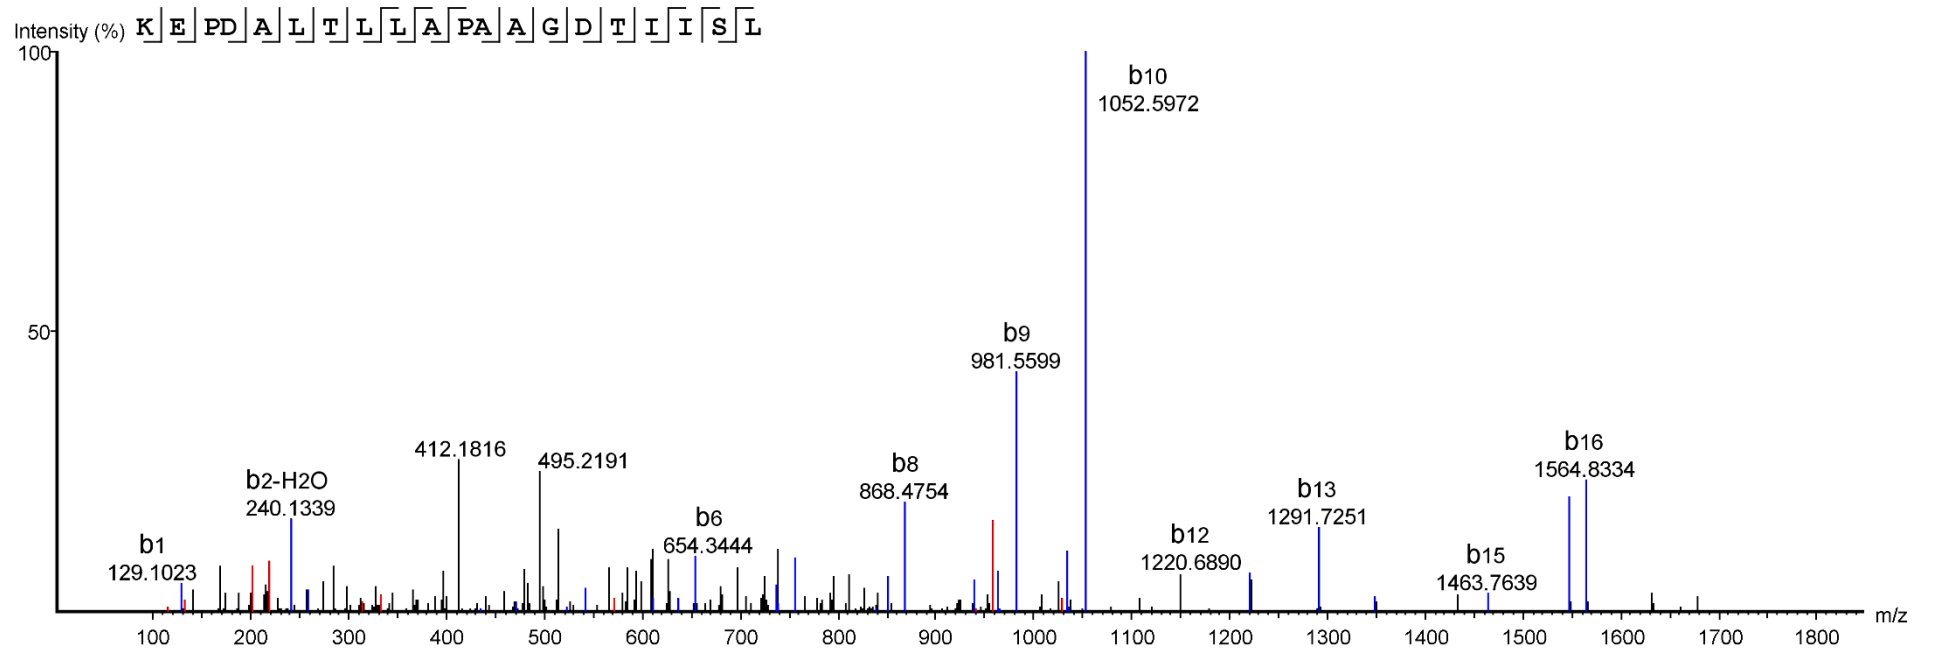

YMT110

Scan #26036

A-092: HIF1A\*<sub>(548-575)</sub>: NPFSTQD TDL DLEALAPYIPADDDDFQLR

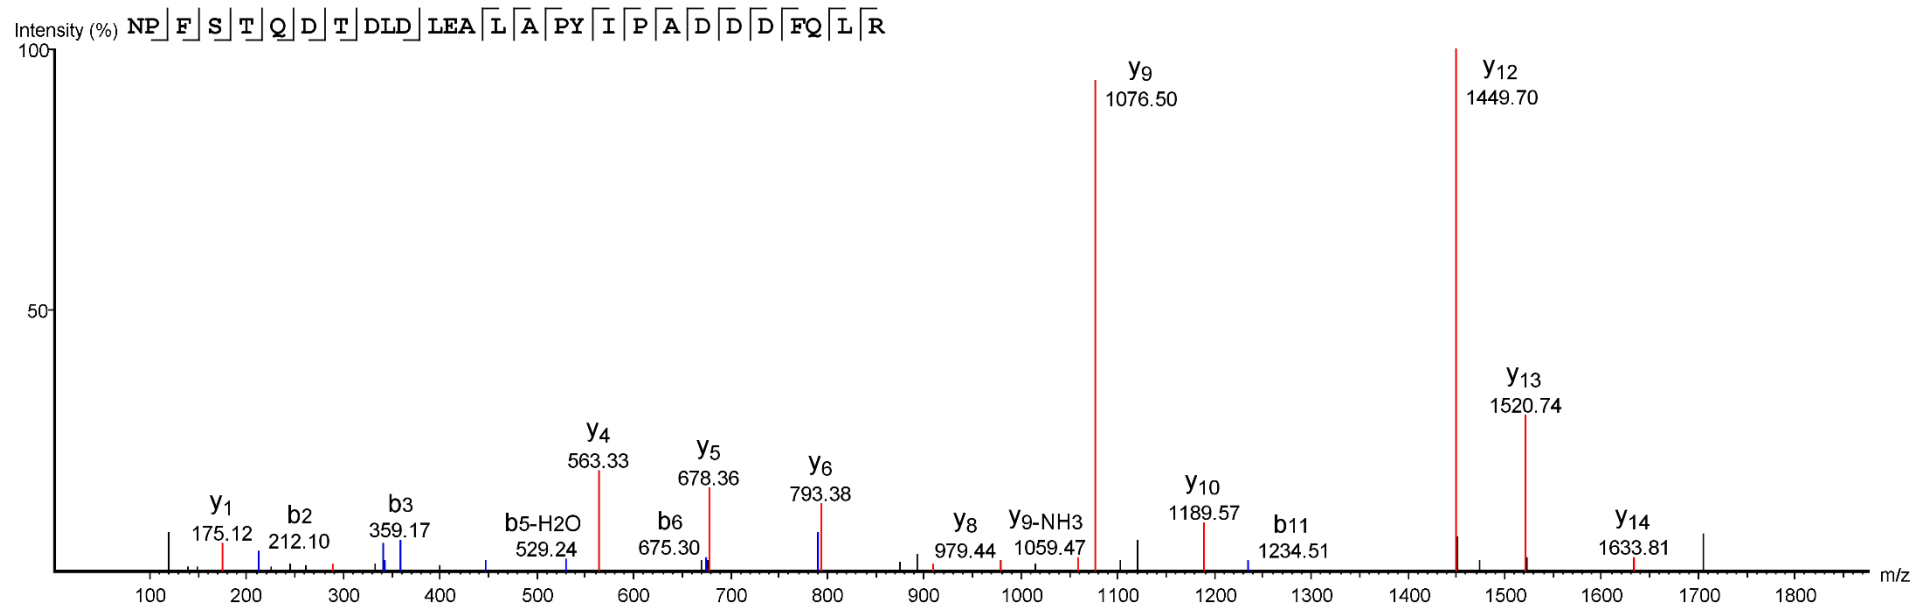

YMT93

Scan #26868

A-093: HIF1A\*<sub>(548-575)</sub>: NPFSTQDTDLDLEALAPYIPADDDFQLR

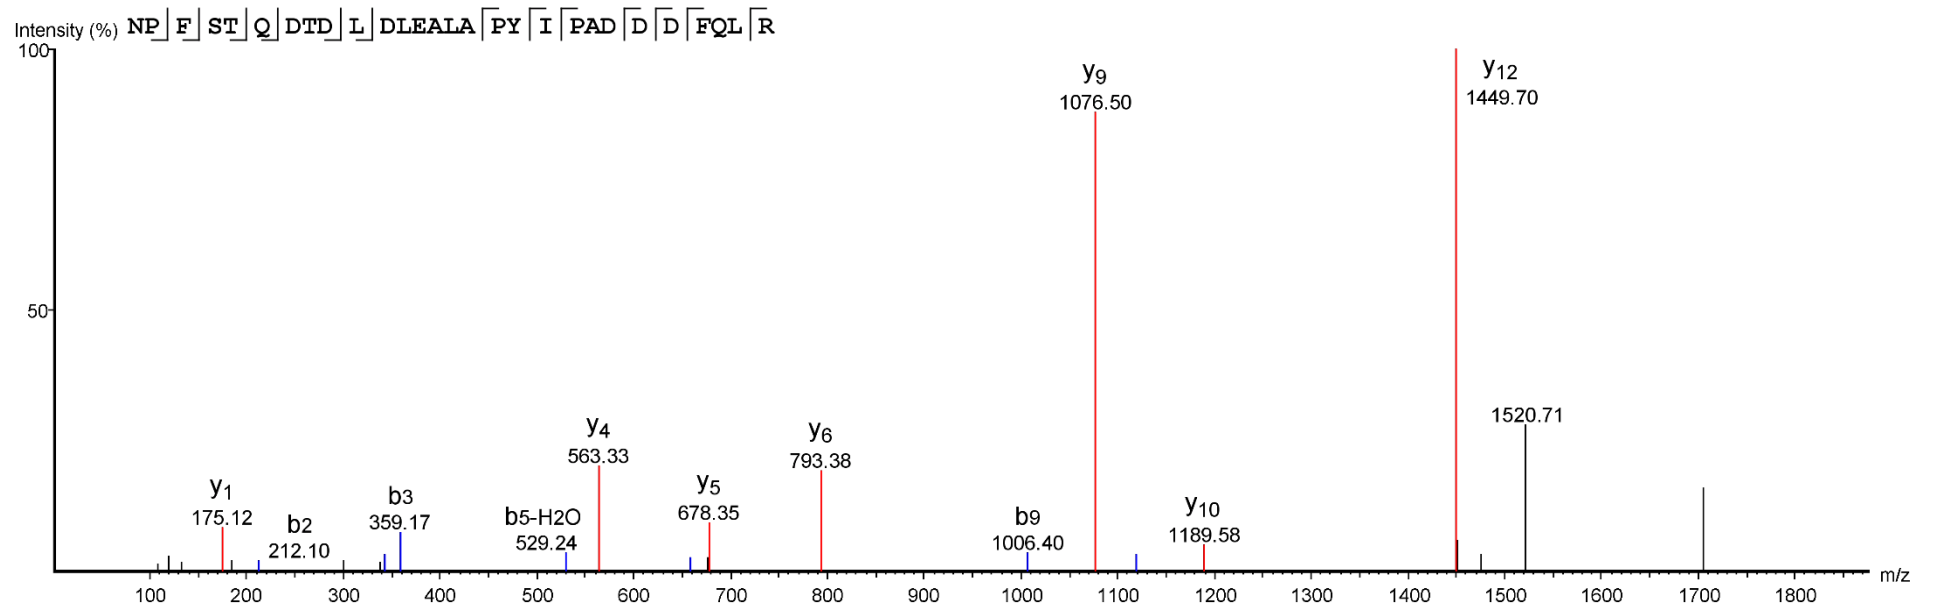

YMT94

Scan #26755

A-094: HIF1A\*<sub>(548-575)</sub>: NPFSTQDTDLLEALAPYIPADDDDFQLR

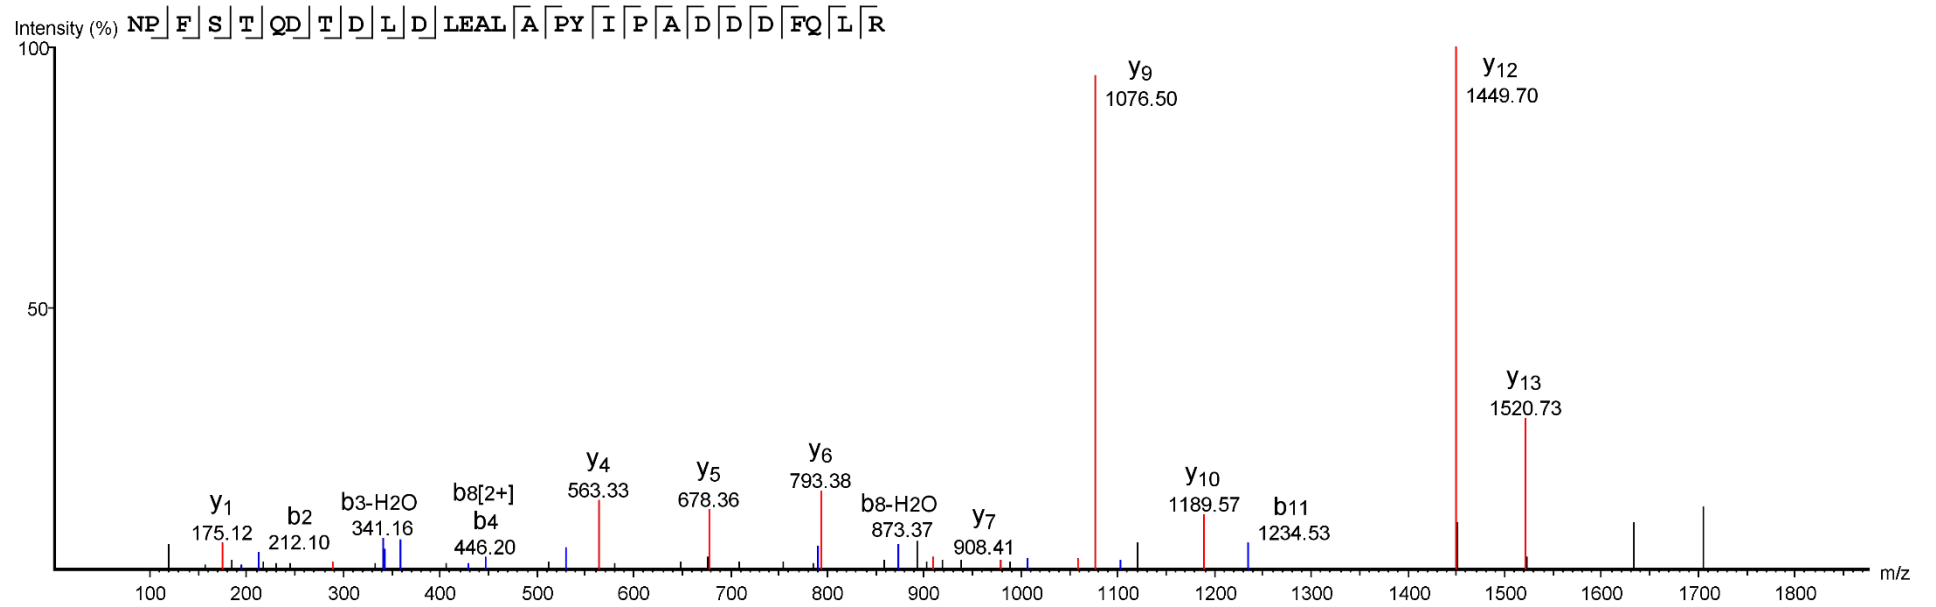

YMT95

Scan #27381

A-095: HIF1A\*<sub>(548-575)</sub>: NPFSTQD**T**DL**D**LEAL**A**P(+15.99)YIPADDD**F**Q**L**R

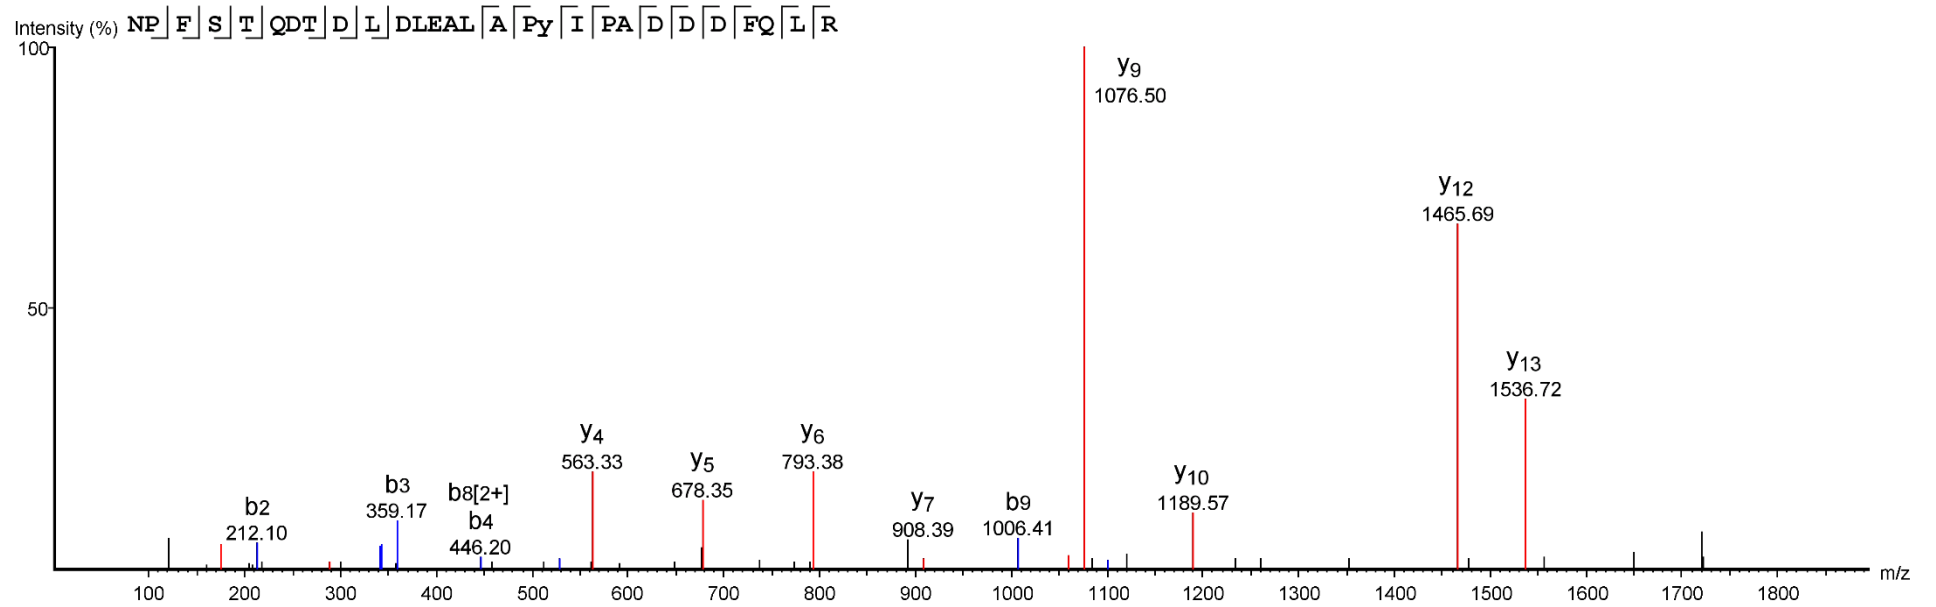

YMT93

Scan #26836

A-096: HIF1A\*<sub>(548-575)</sub>: NPFSTQD**T**LDLEALAP(+15.99)YIPADDD**F**QLR

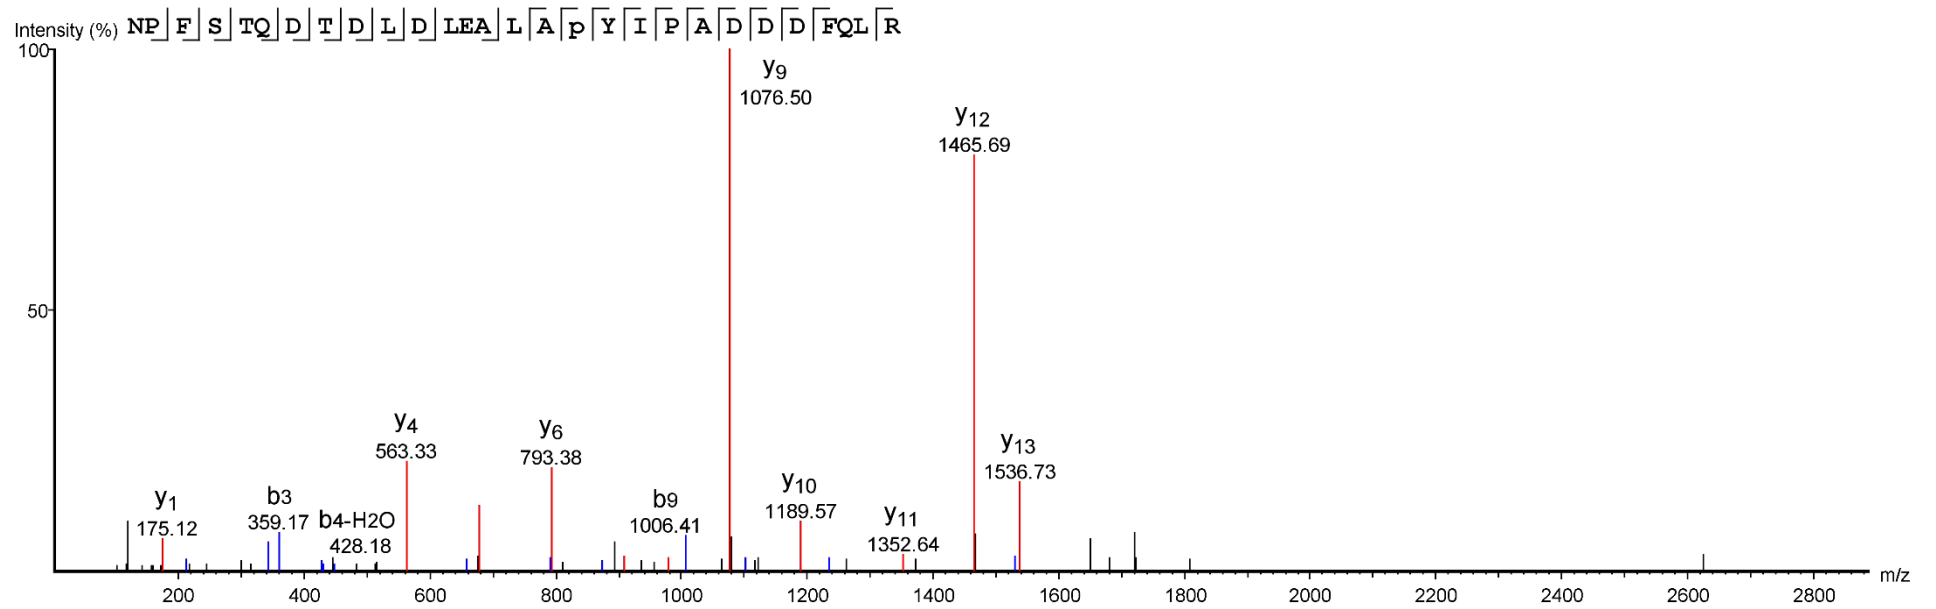

YMT94

Scan #26629



A-097: HIF1A\*<sub>(548-575)</sub>: NPFSTQD**TDL**DLEALAP(+15.99)YIPADDDDFQLR

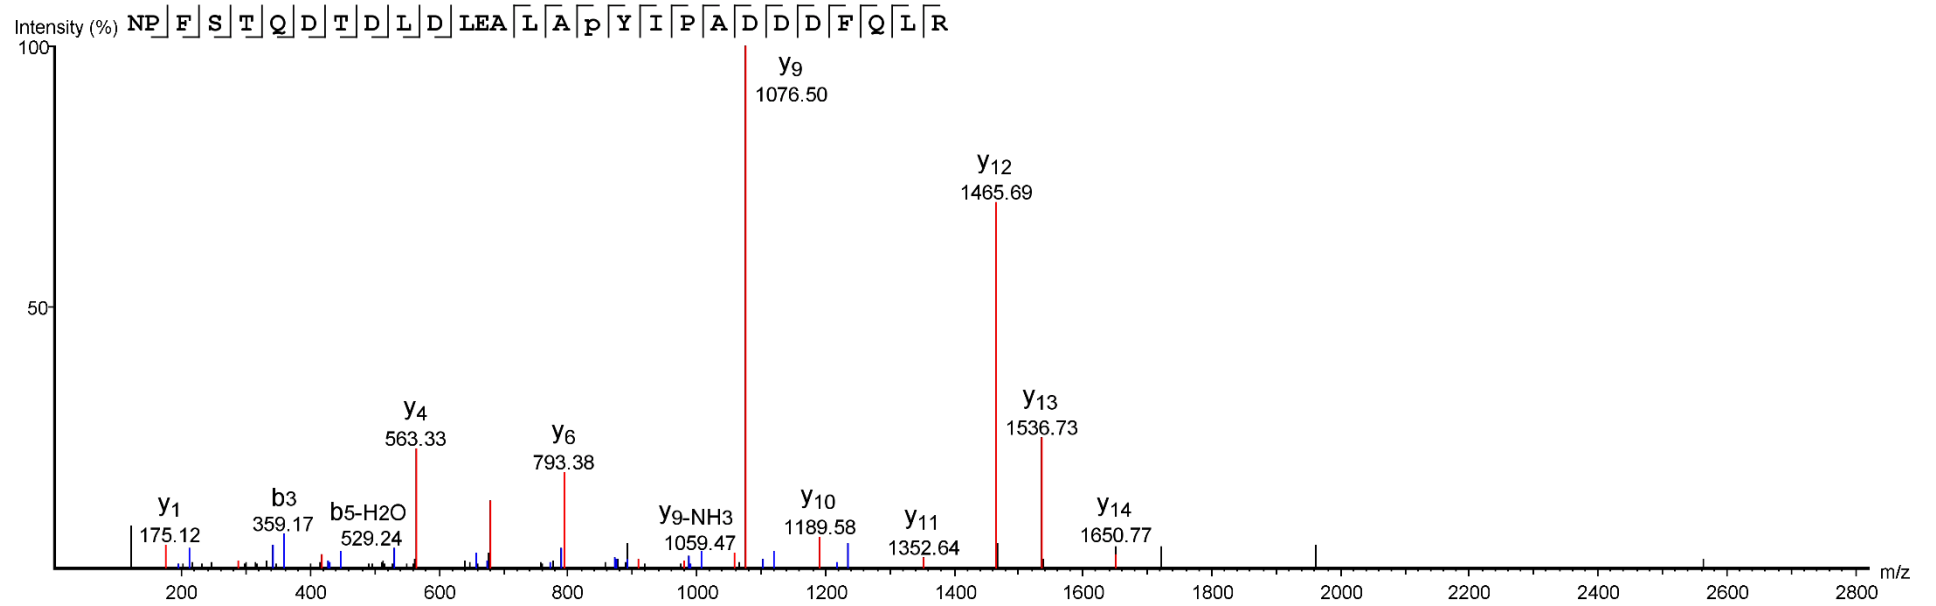

YMT95

Scan #27317

A-098: HIF1A\*<sub>(392-403)</sub>: KEPDALTLLAPA

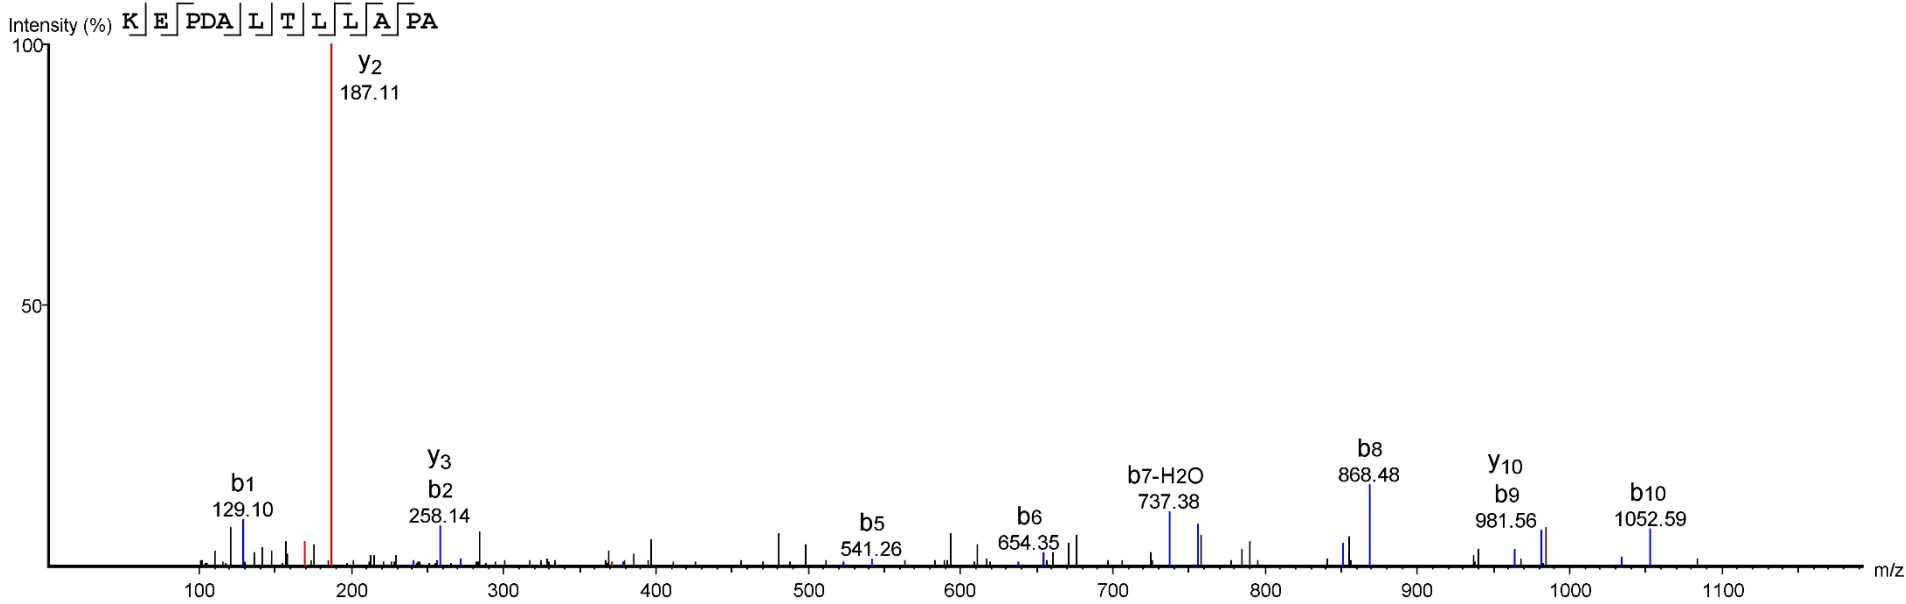

YMT93  
Scan #17853

A-099: HIF1A\*<sub>(392-403)</sub>: KEPDALTLLAPA

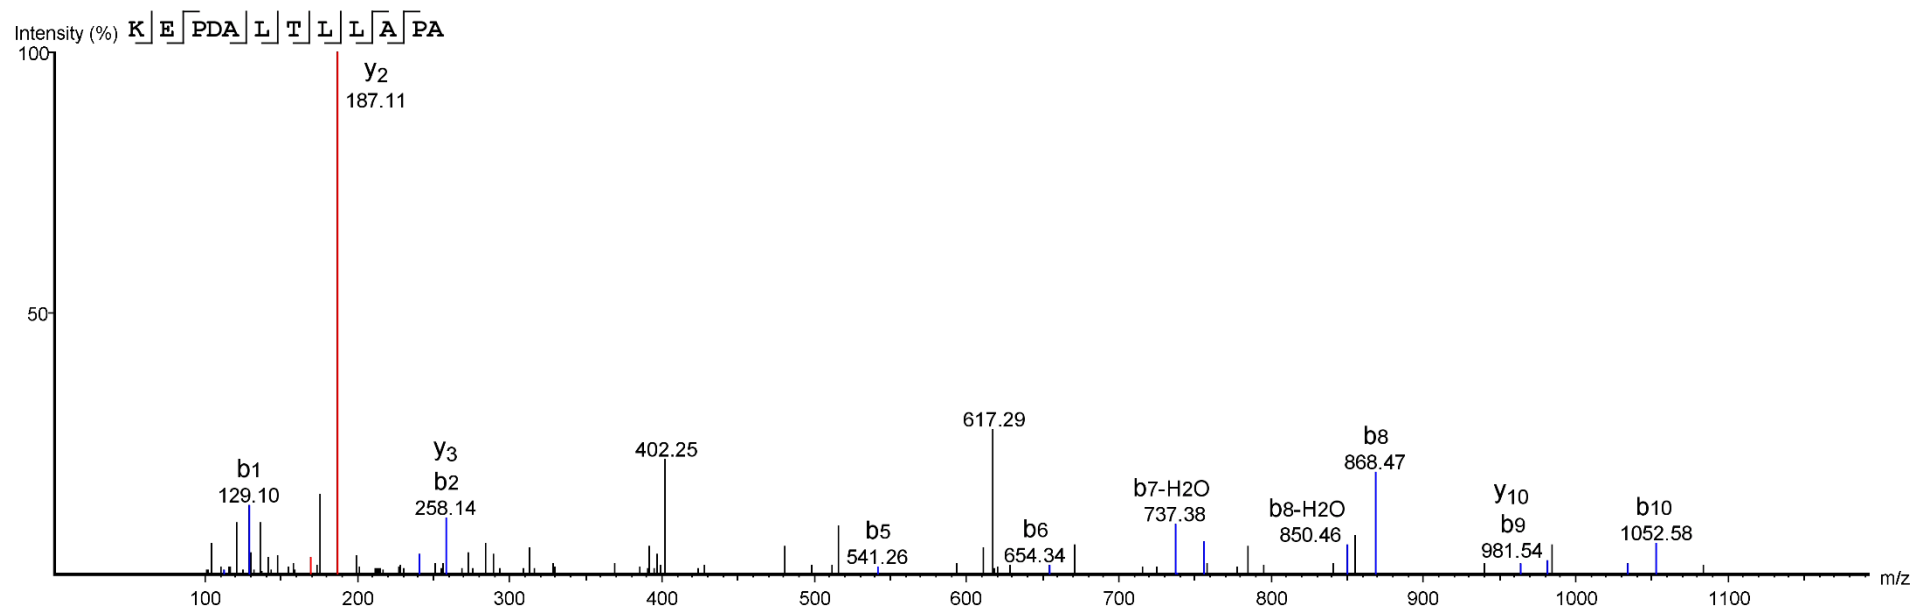

YMT95

Scan #18172

A-100: HIF1A\*<sub>(392-403)</sub>: KEPDALTLLAP(+15.99)A

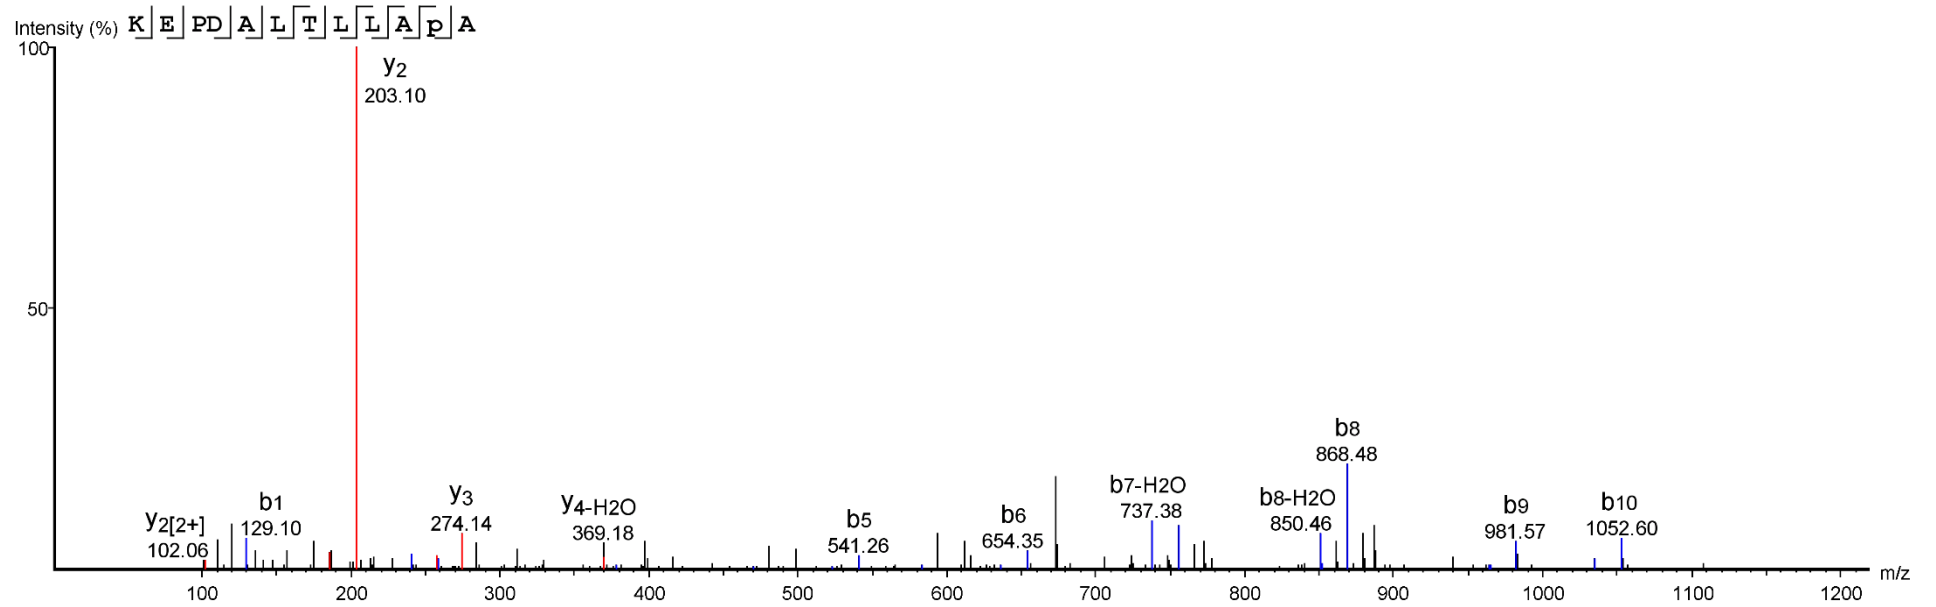

YMT94

Scan #16057

A-101: ACACB<sub>(341-366)</sub>: R|P|V|Q|A|V|W|A|G|W|G|H|A|S|E|N|P|K|L|P|E|L|L|C|K

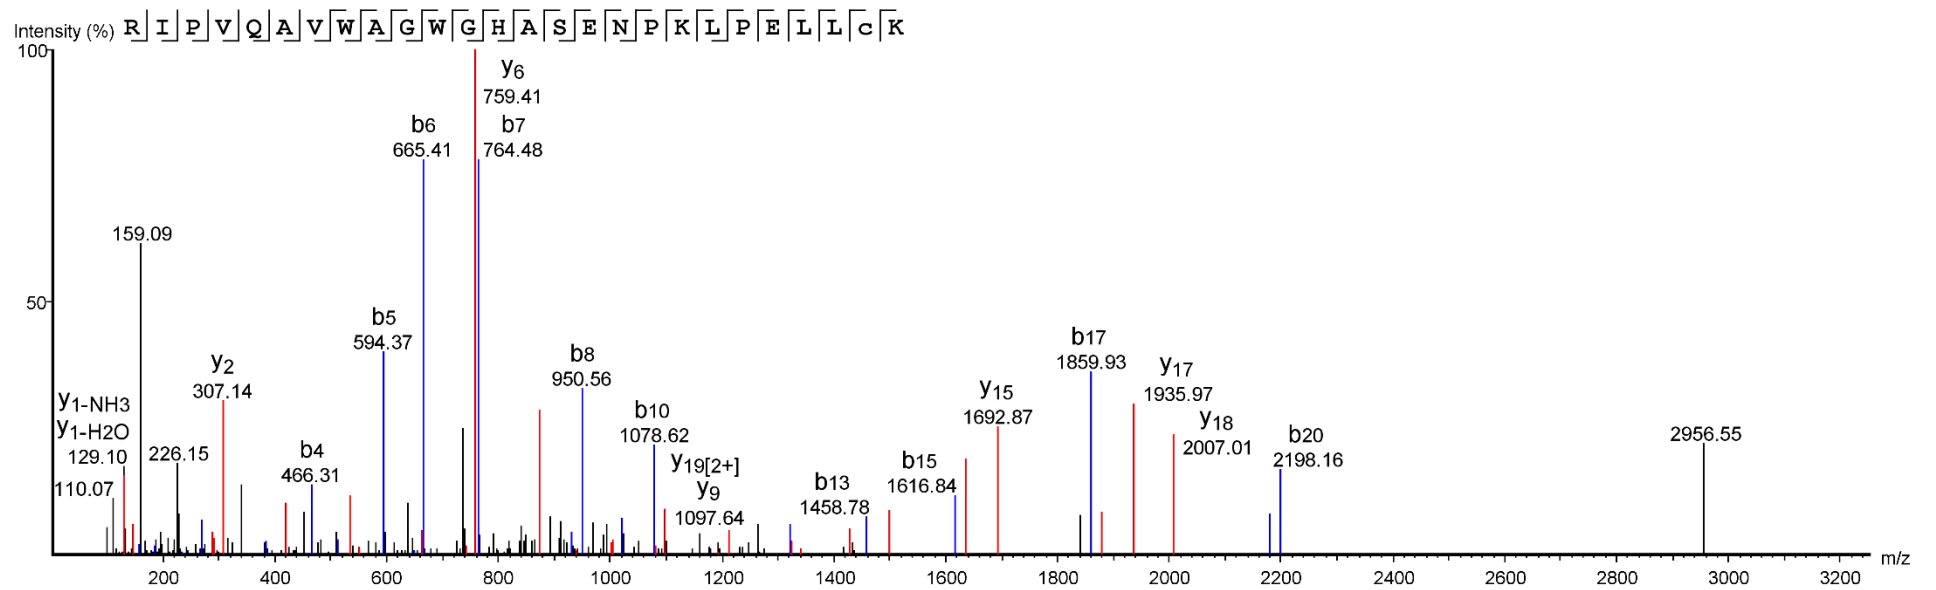

Pep17  
Scan  
#14304

A-102: ACACB<sub>(341-366)</sub>: RIP(+15.99)VQAVWAGWGHASENPKLPELLcK

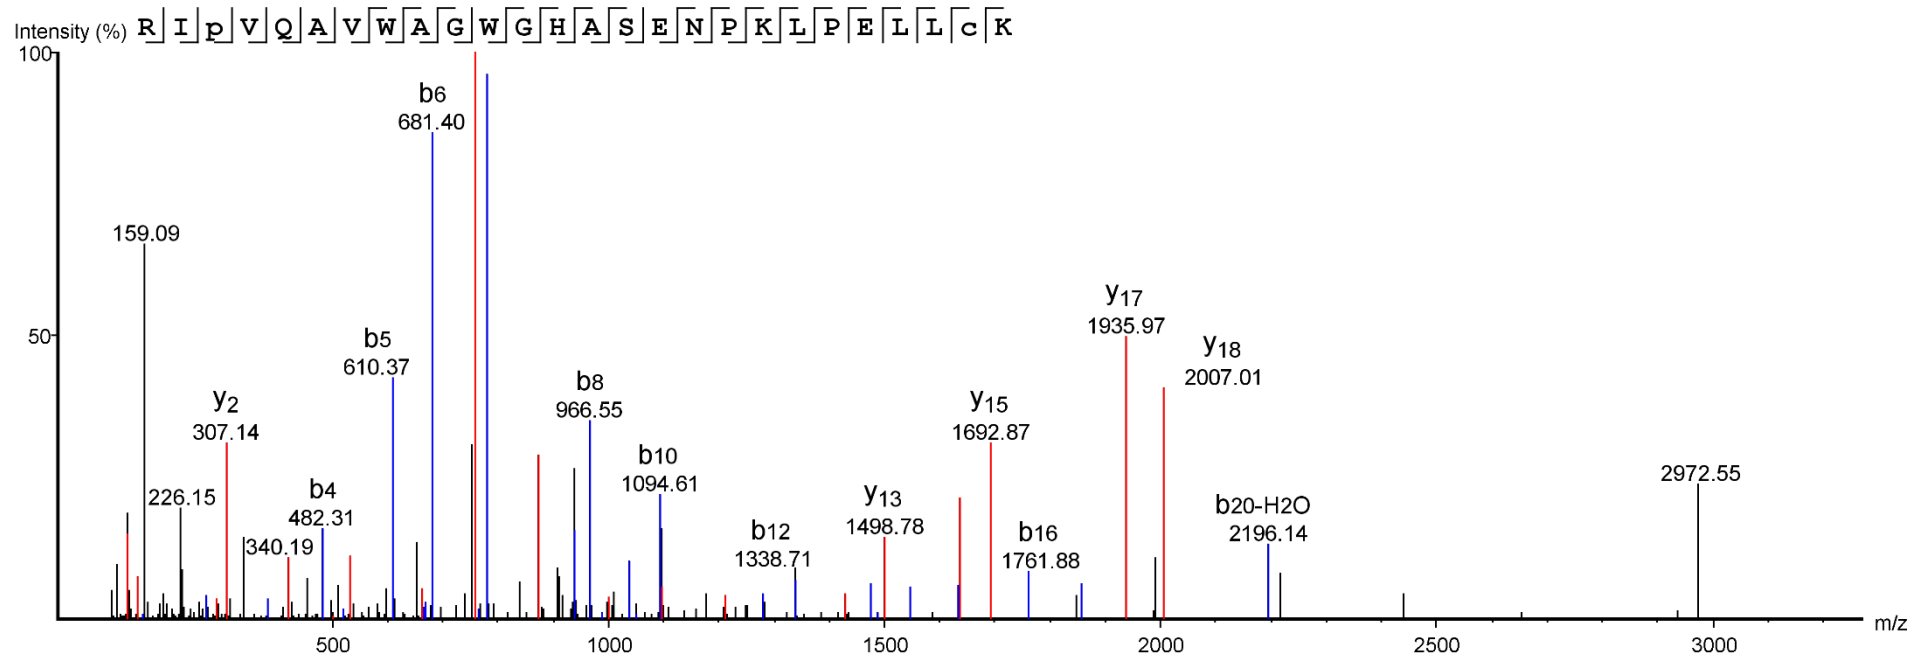

Pep17

Scan #13775

A-103: ACACB<sub>(341-366)</sub>: R**I**PVQAVWAGWGHASENPKLPELLC(+57.02)K

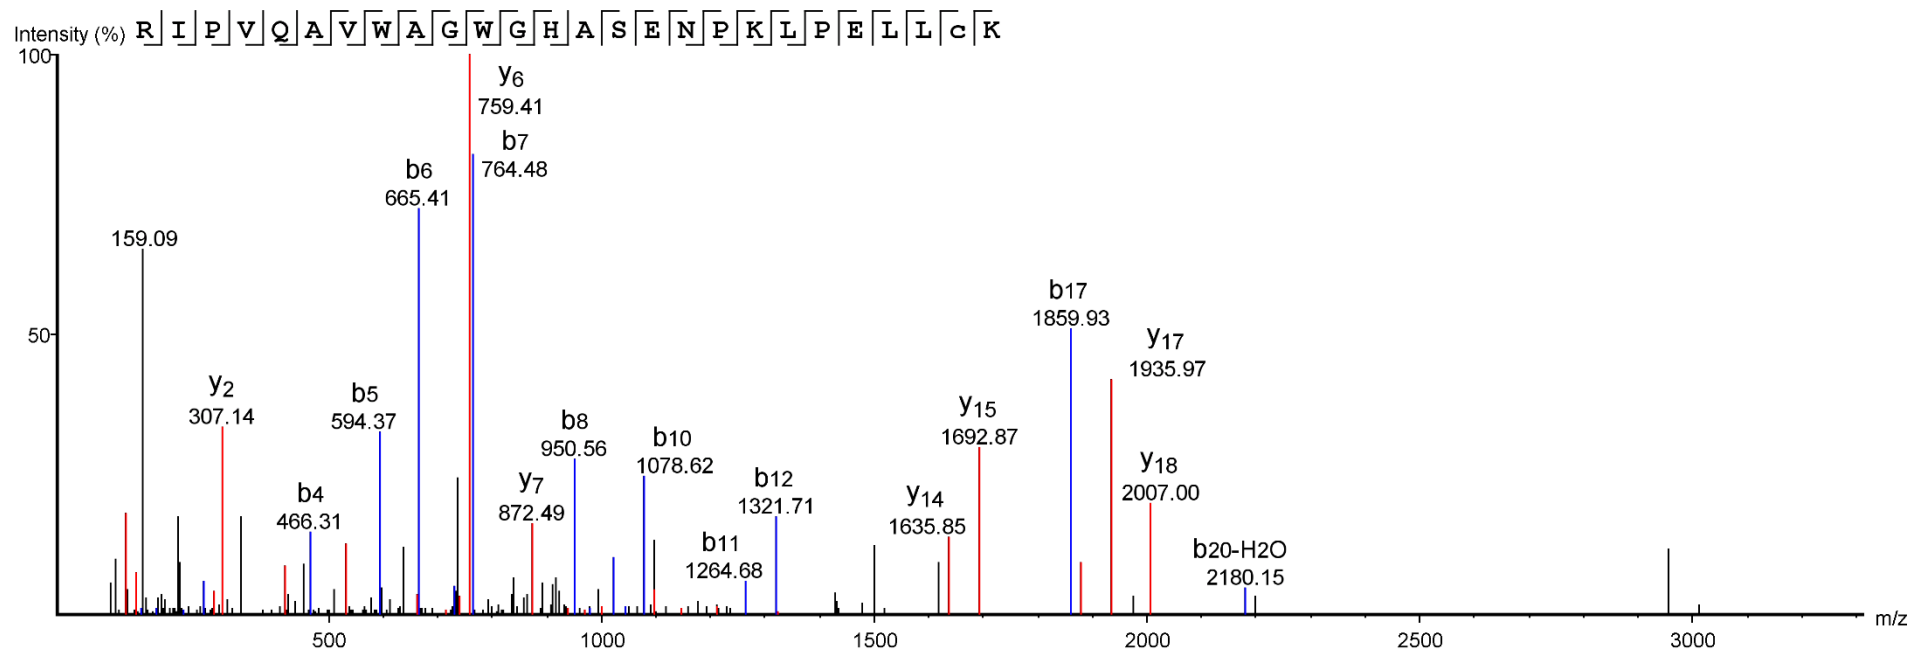

YMT86

Scan #19280

A-104: ACACB<sub>(341-366)</sub>: RIPVQAVWAGWGHASENPKLPPELLC(+57.02)K

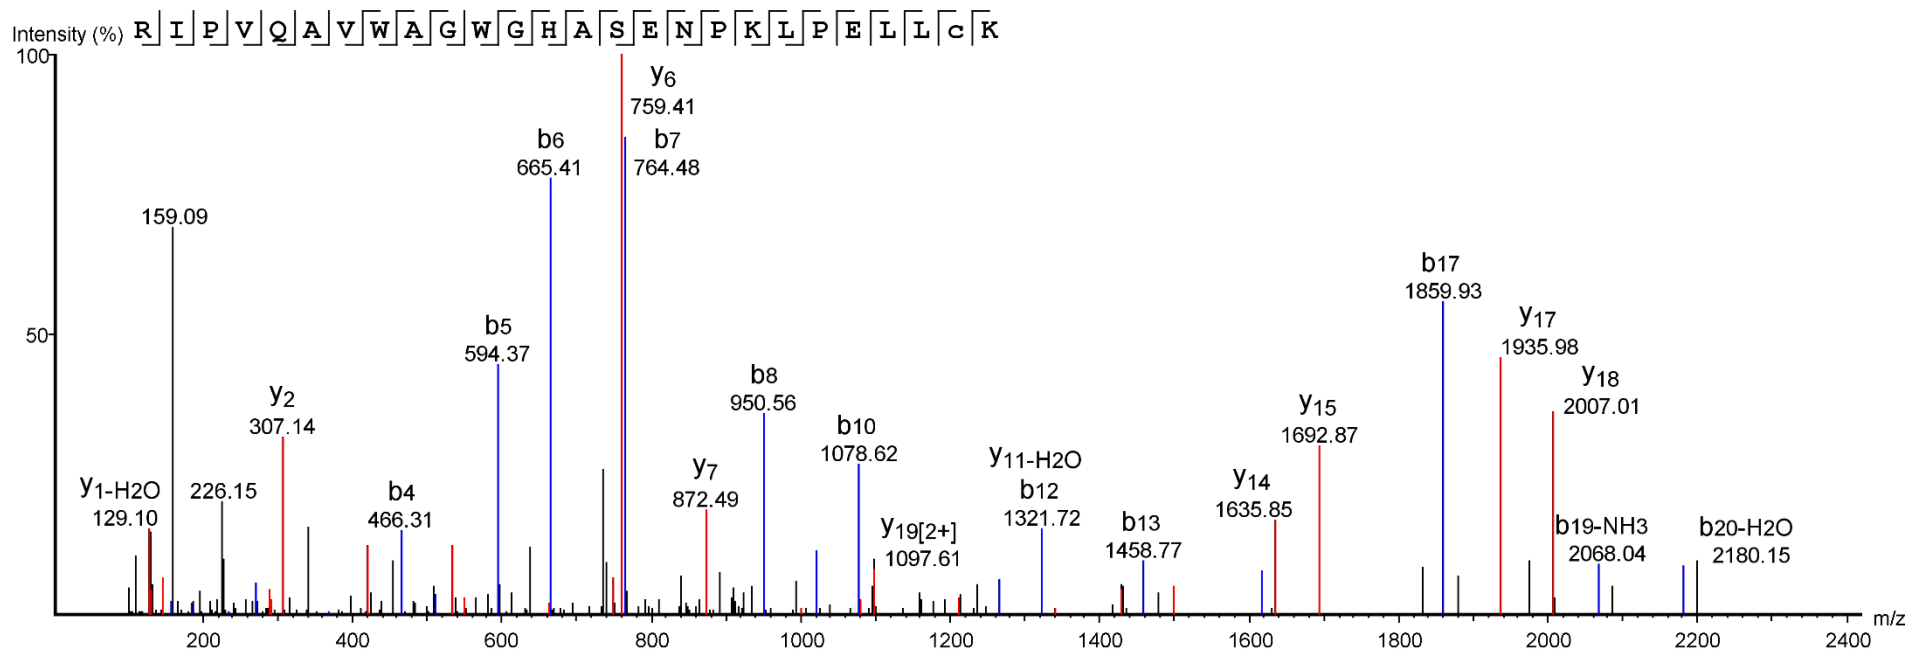

YMT88

Scan #18054



A-105: ACACB<sub>(436-454)</sub>: DVDEGLEAAERIGFPLMIK

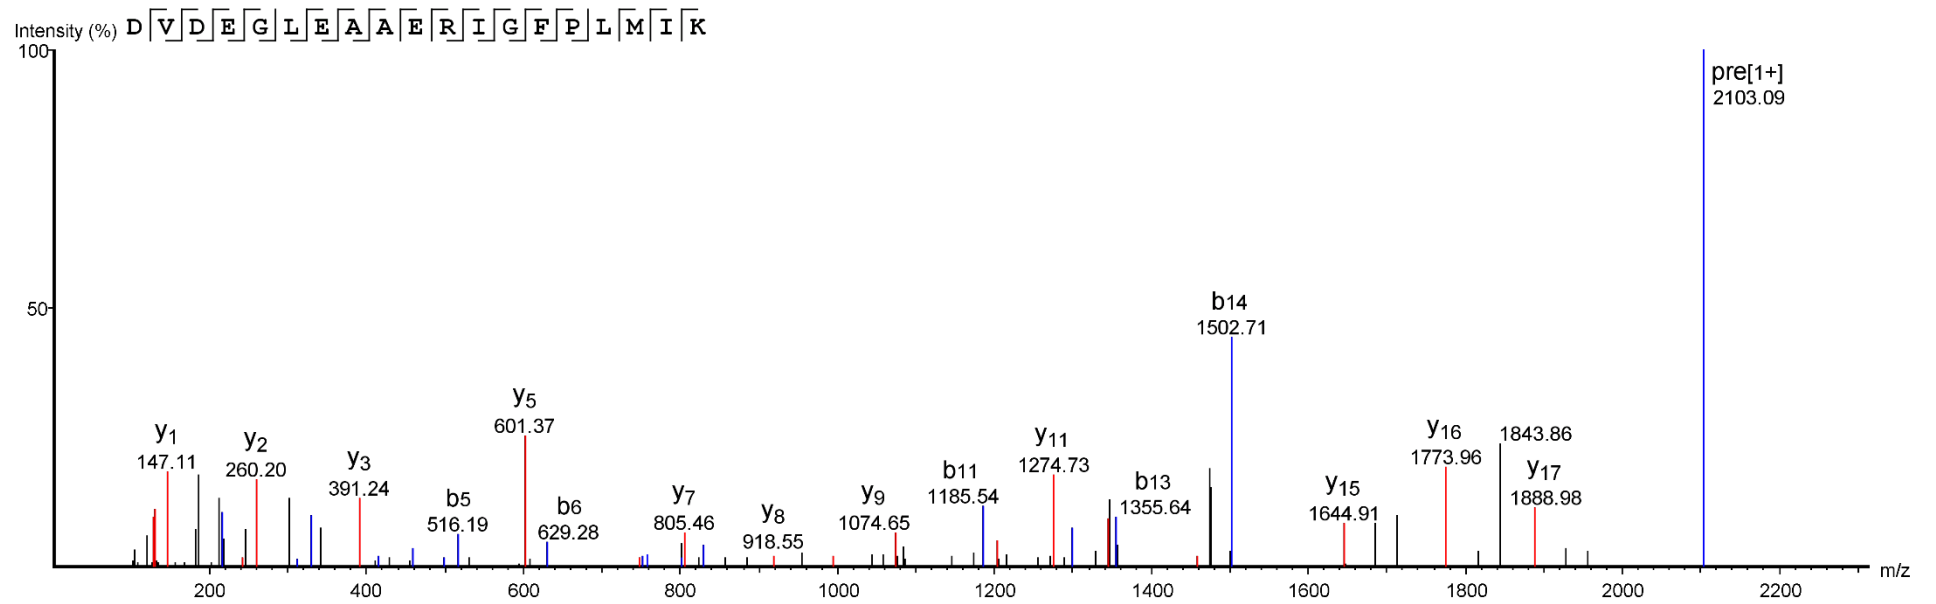

Pep17

Scan #19689

A-106: ACACB<sub>(436-454)</sub>: DVDEGLEAAERIGFP(+15.99)LMIK

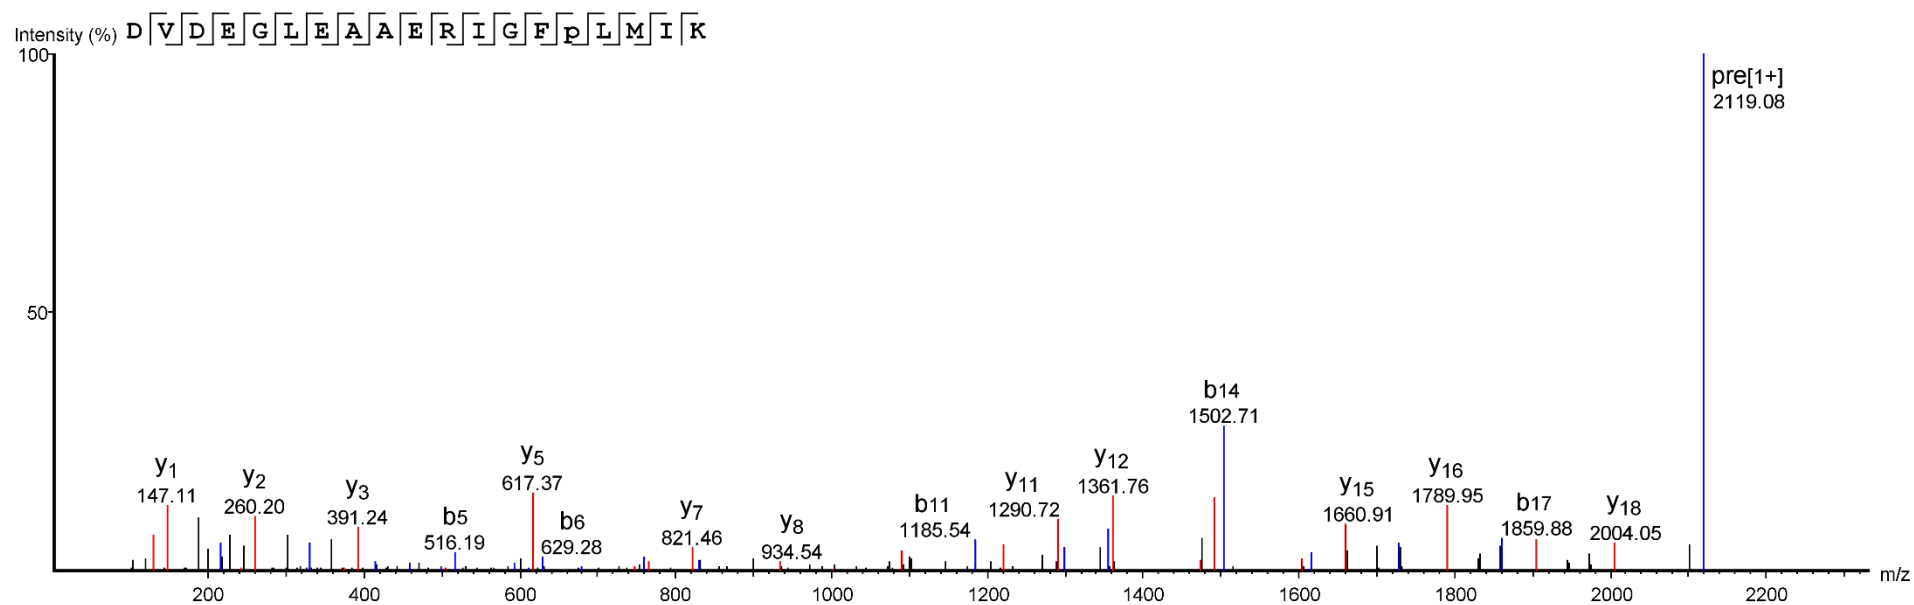

Pep17

Scan #18888

A-107: ACACB<sub>(436-454)</sub>: DVDEGLEAAERIGFPLM(+15.99)IK

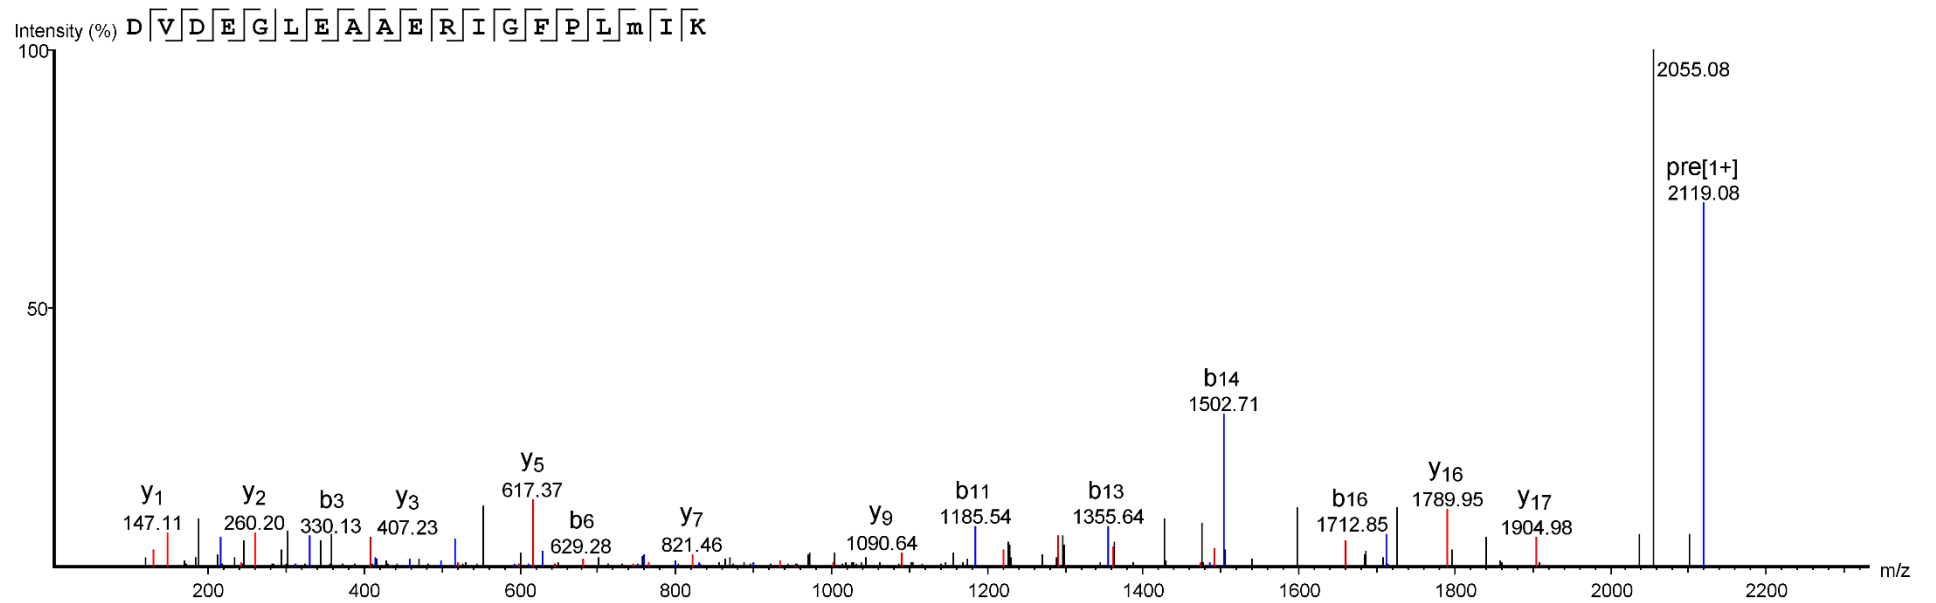

Pep17

Scan #18219

A-108: ACACB<sub>(436-454)</sub>: DVDEGLEAAERIGFP(+15.99)LM(+15.99)IK

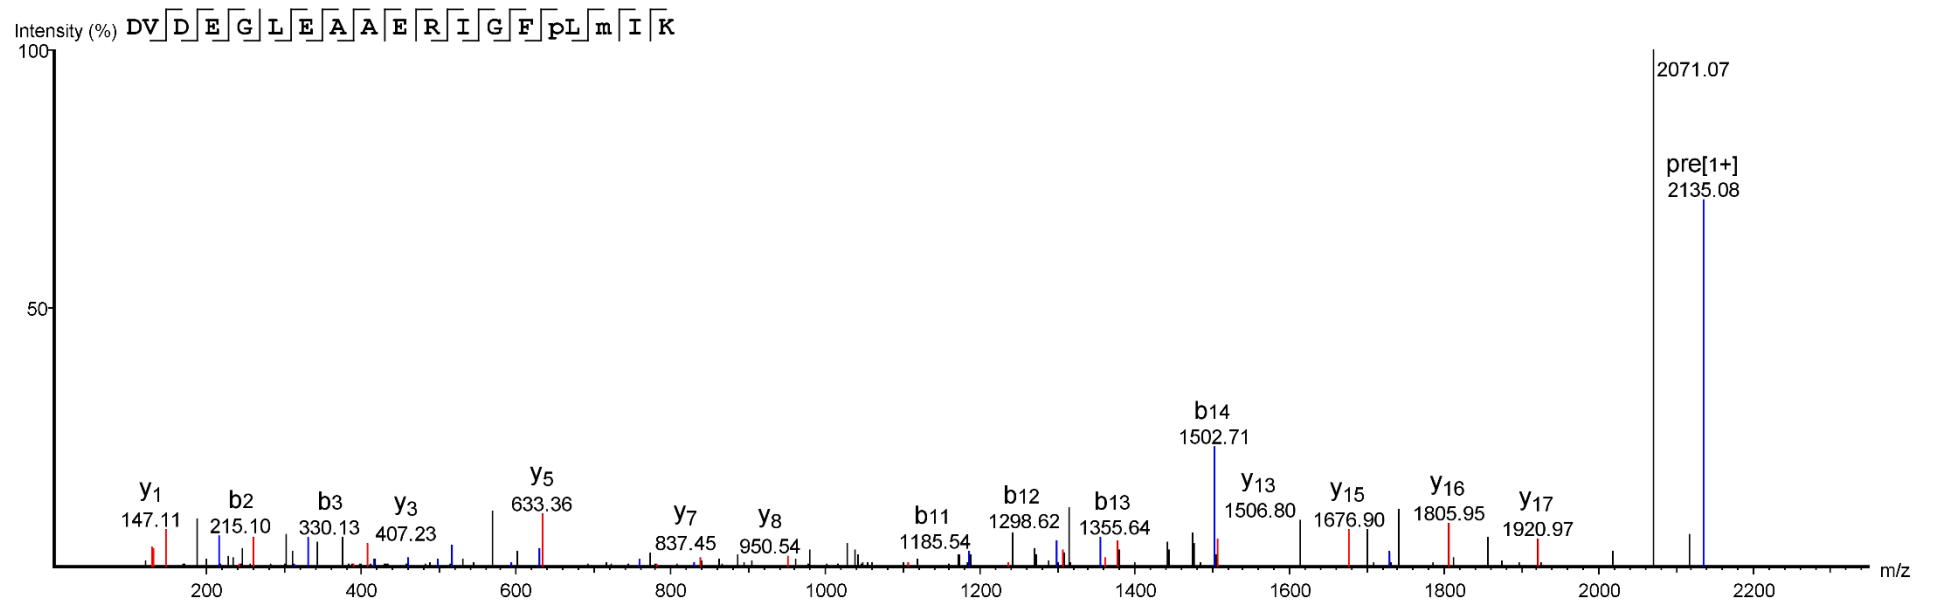

Pep17

Scan #17184

A-109: ACACB<sub>(436-454)</sub>: DVDEGLEAAERIGFPLMIK

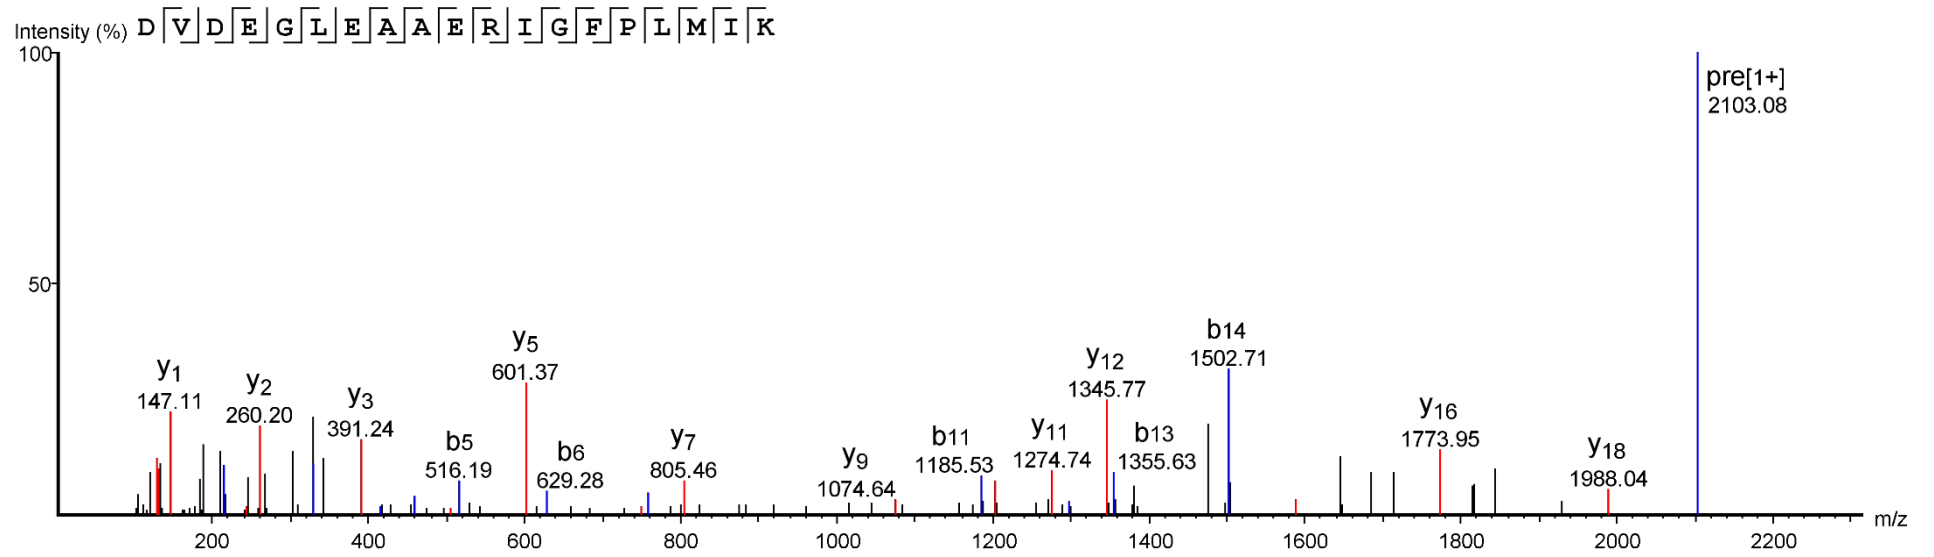

YMT86

Scan #25906

A-110: ACACB<sub>(436-454)</sub>: DVDEGLEAAERIGFPLMIK

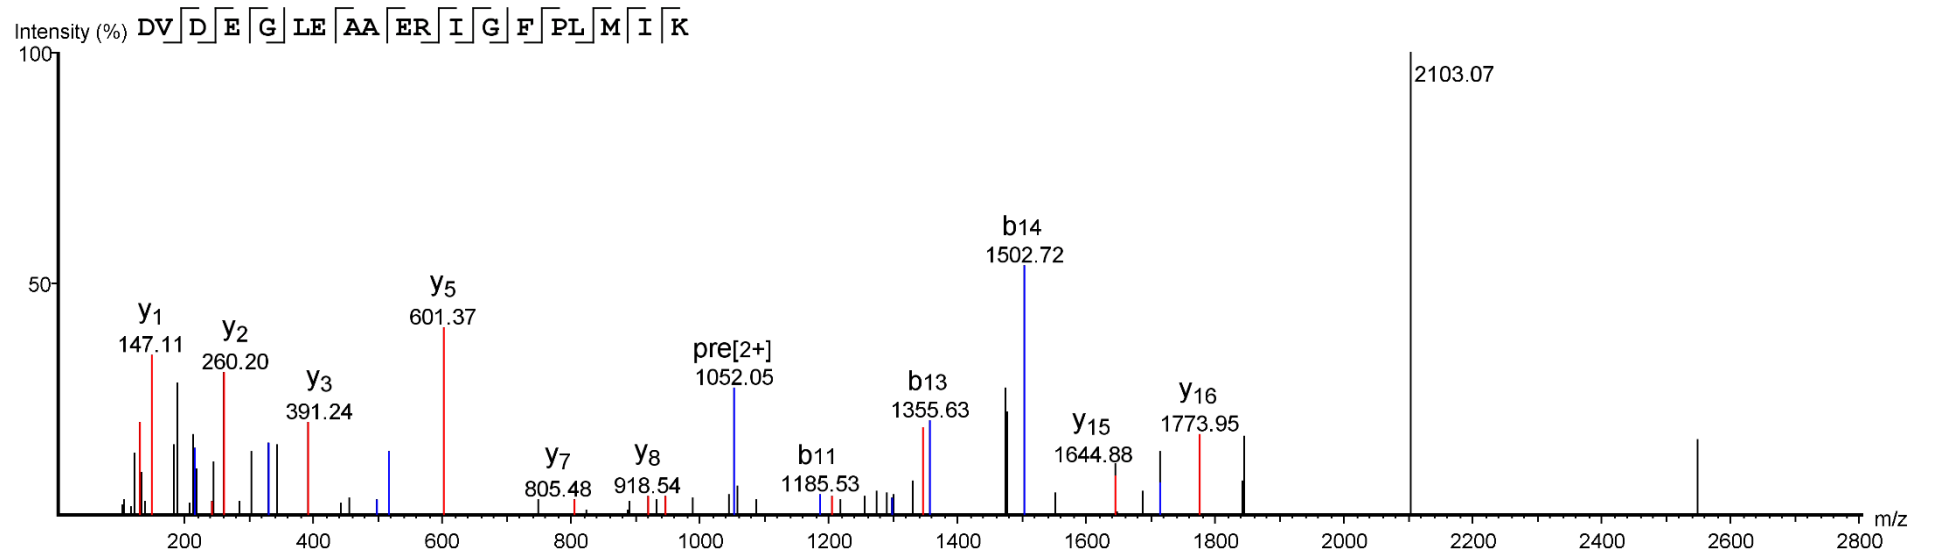

YMT88

Scan #24140

A-111: ACACB<sub>(436-454)</sub>: DVDEGLEAAERIGFPLM(+15.99)IK

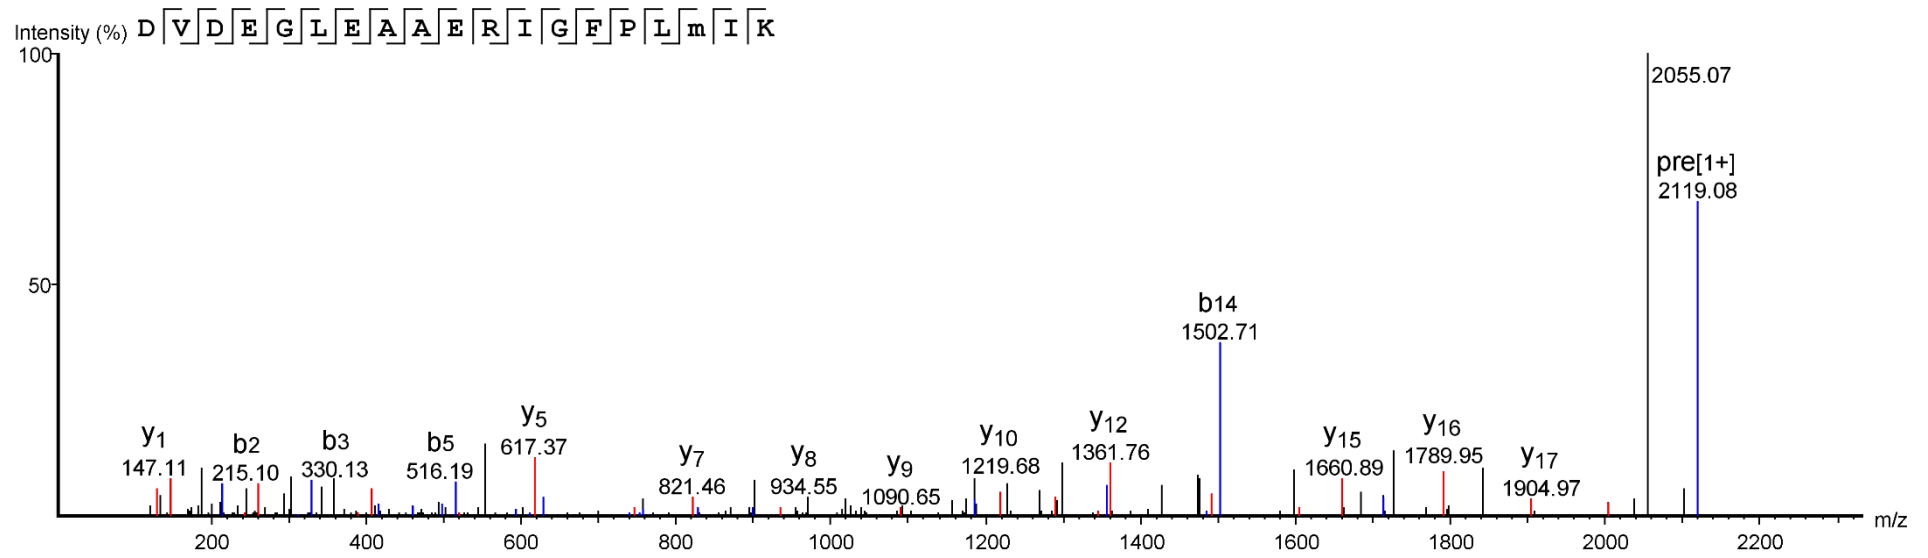

YMT86

Scan #24339

A-112: ACACB<sub>(436-454)</sub>: DVDEGLEAAERIGFPLM(+15.99)IK

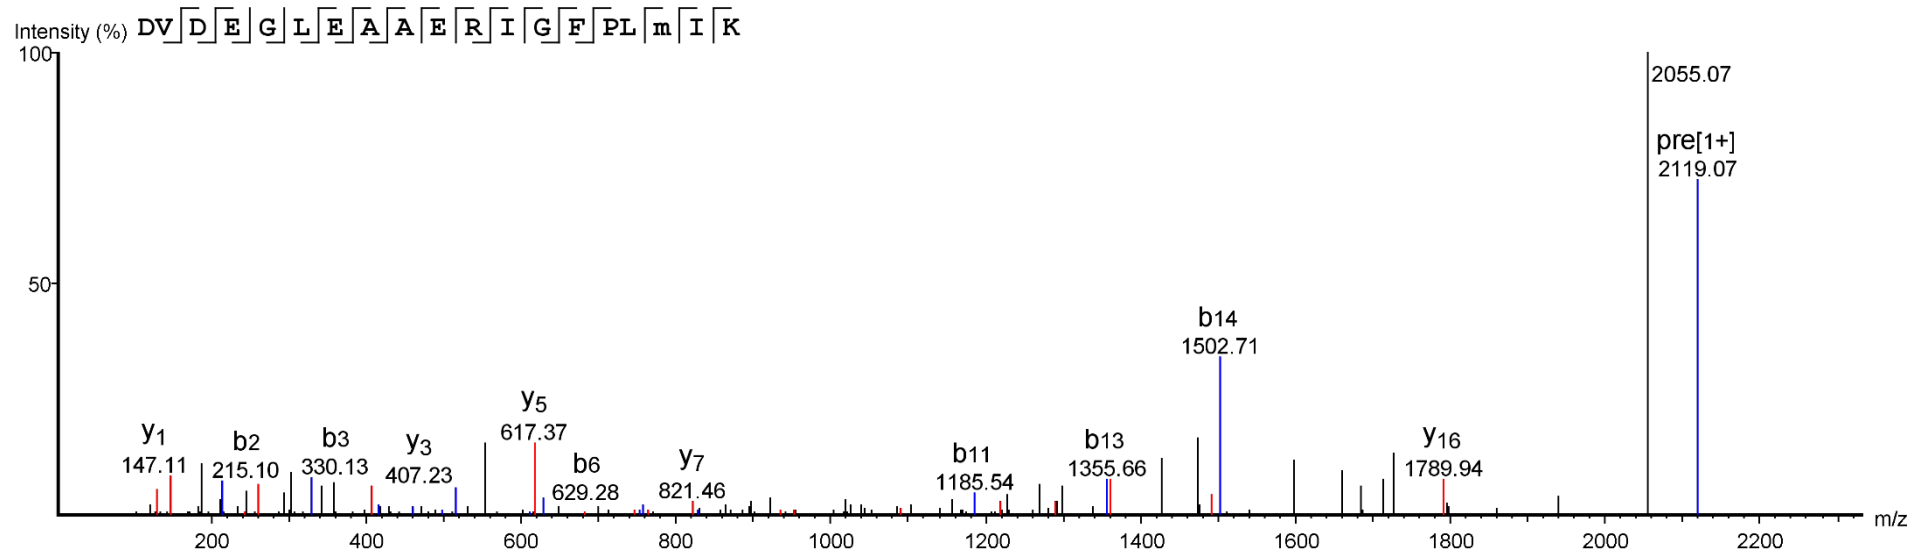

YMT88

Scan #22680



A-113: ACTB<sub>(292-312)</sub>: DLYANTVLSGGTTMYPGIADR

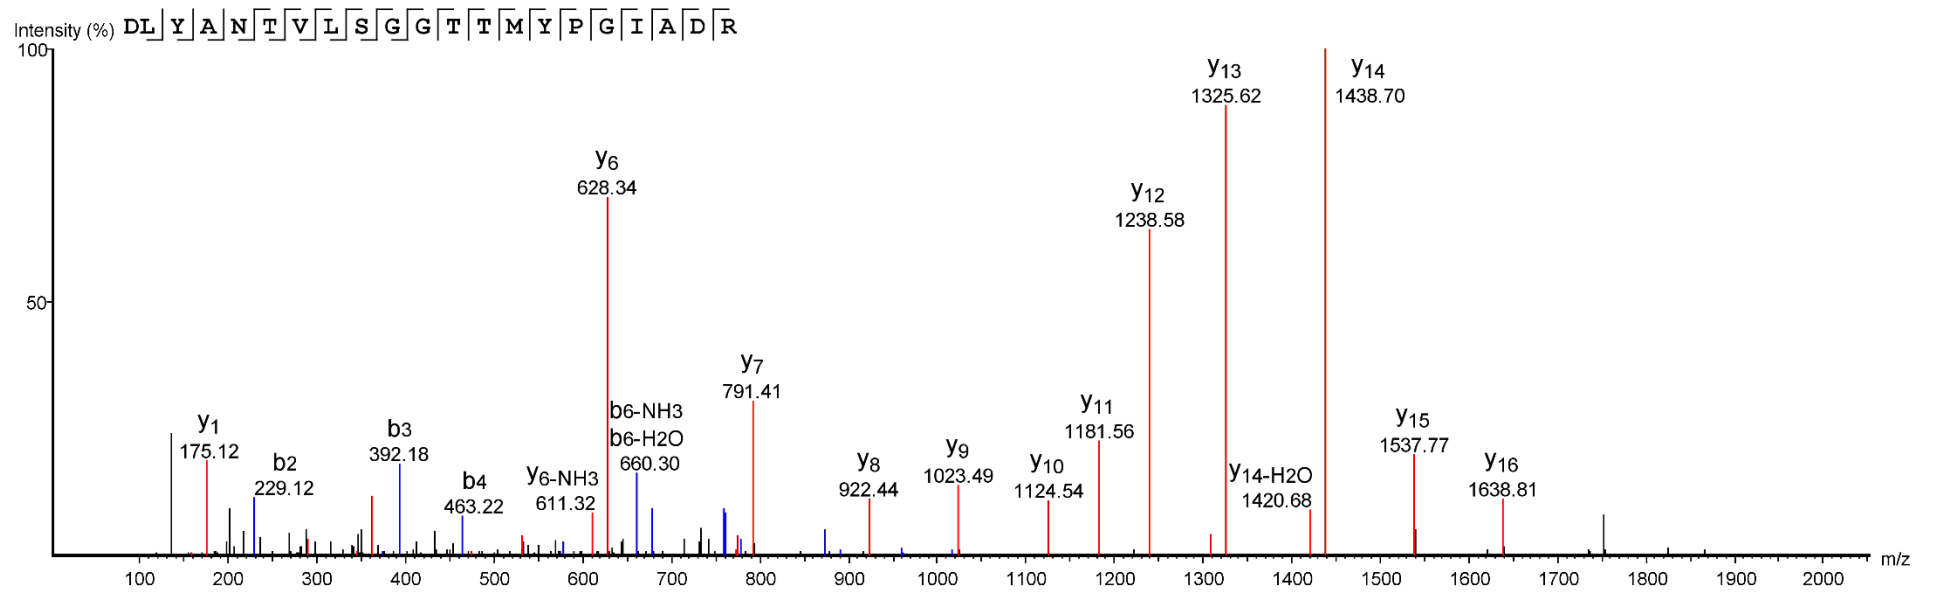

Pep20

Scan #10685

A-114: ACTB<sub>(292-312)</sub>: DLYANTVLSGGTTmY PGIADR

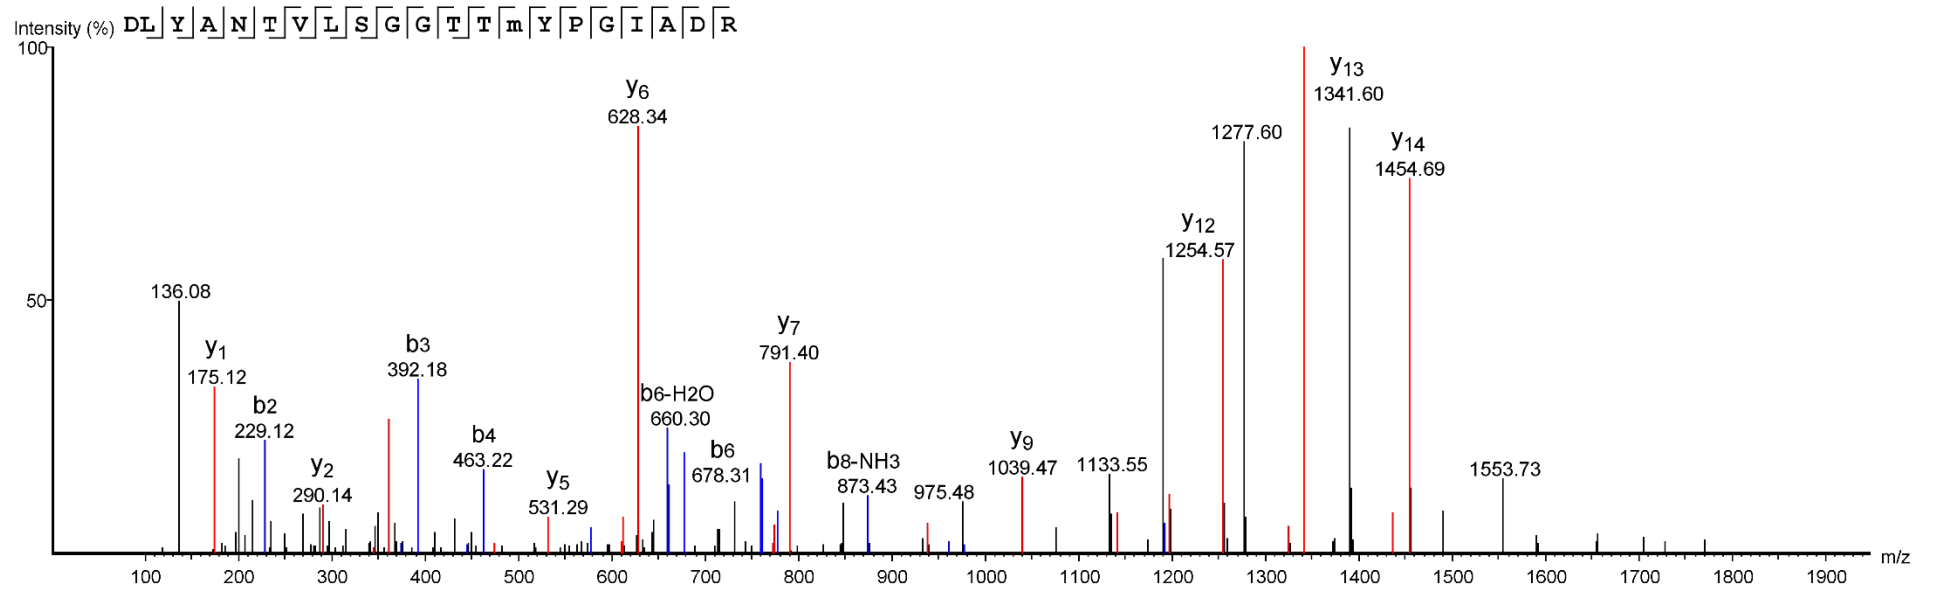

Pep20

Scan #9564

A-115: ACTB<sub>(292-312)</sub>: DLYANTVLSGGTTMYP(+15.99)GIADR

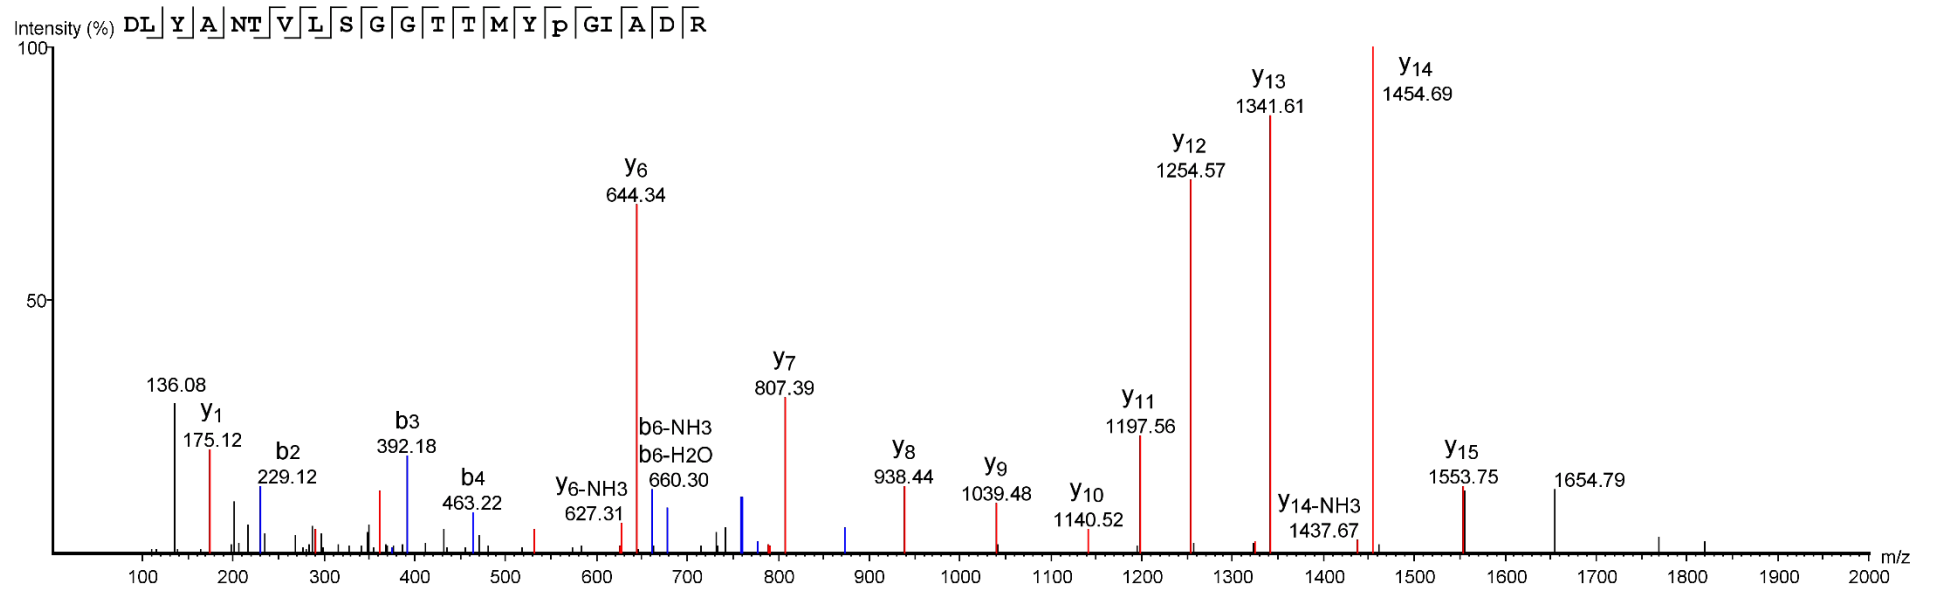

Pep20

Scan #10295

A-116: ACTB<sub>(292-312)</sub>: DLYANTVLSGGTTM(+15.99)Y<sub>P</sub>(+15.99)GIADR

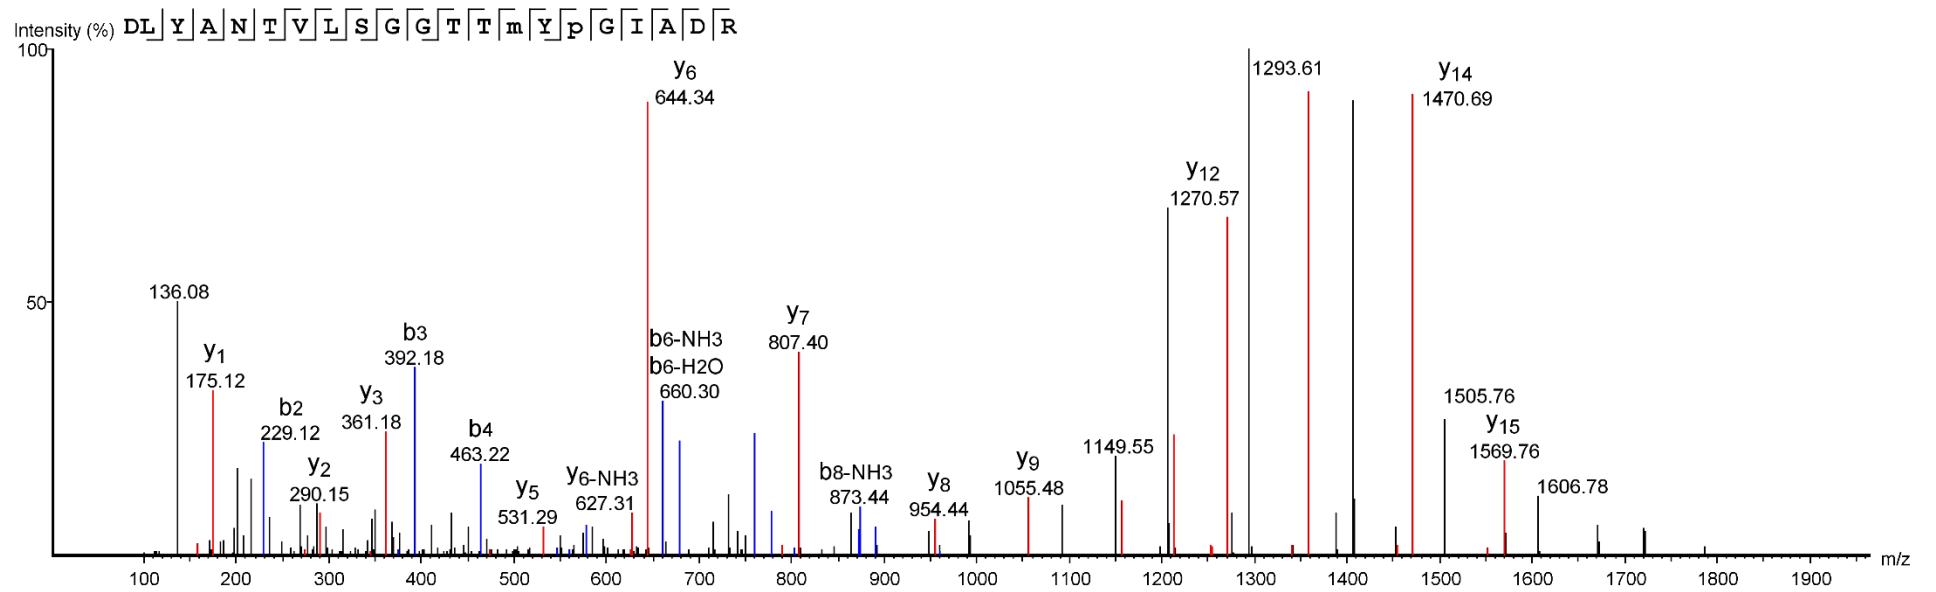

Pep20

Scan #9055

A-117: ACTB<sub>(292-312)</sub>: DLYANTVLSGGTTMYPGIADR

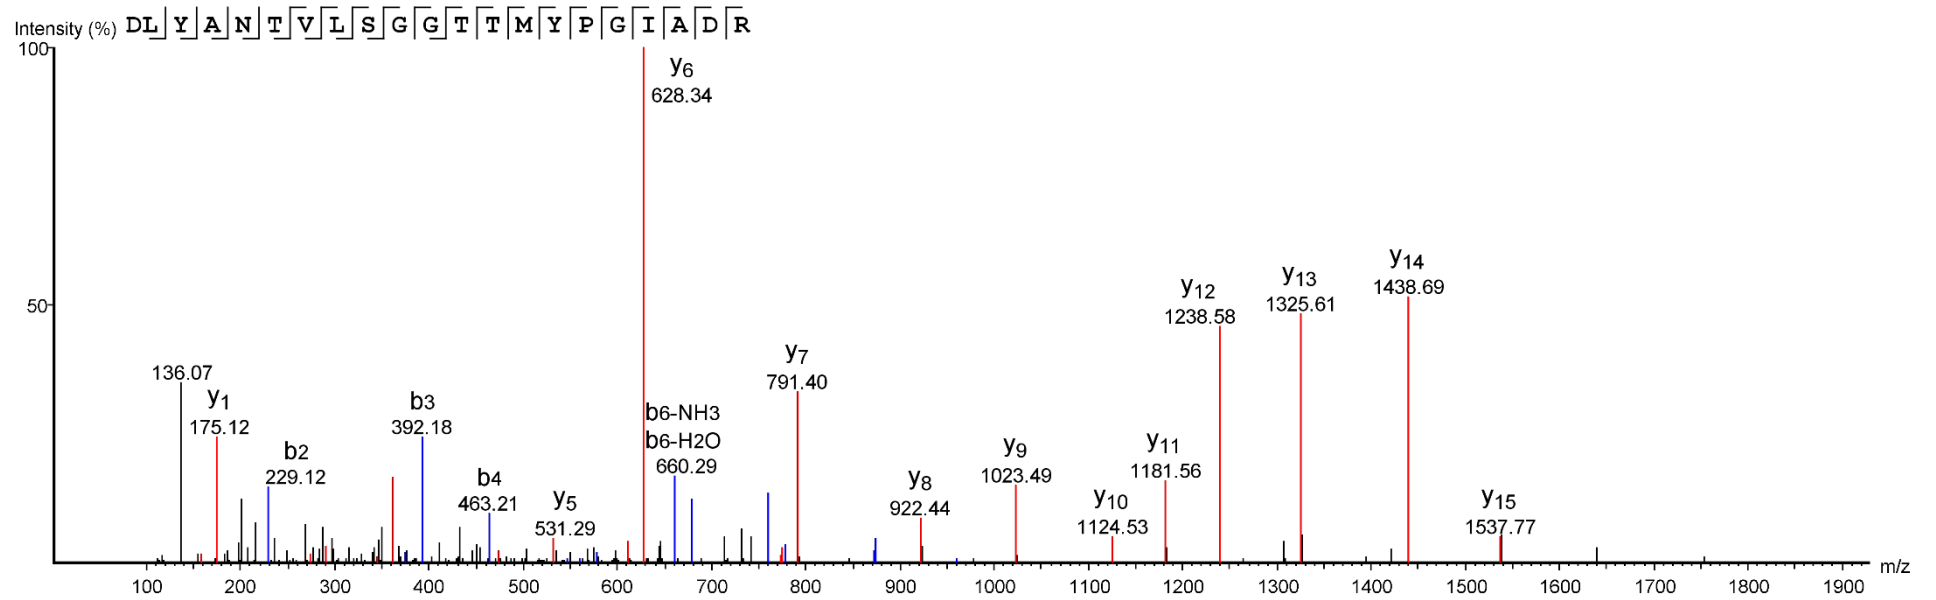

YMT41

Scan #20318

A-118: ACTB<sub>(292-312)</sub>: DLYANTVLSGGTTMYPGIADR

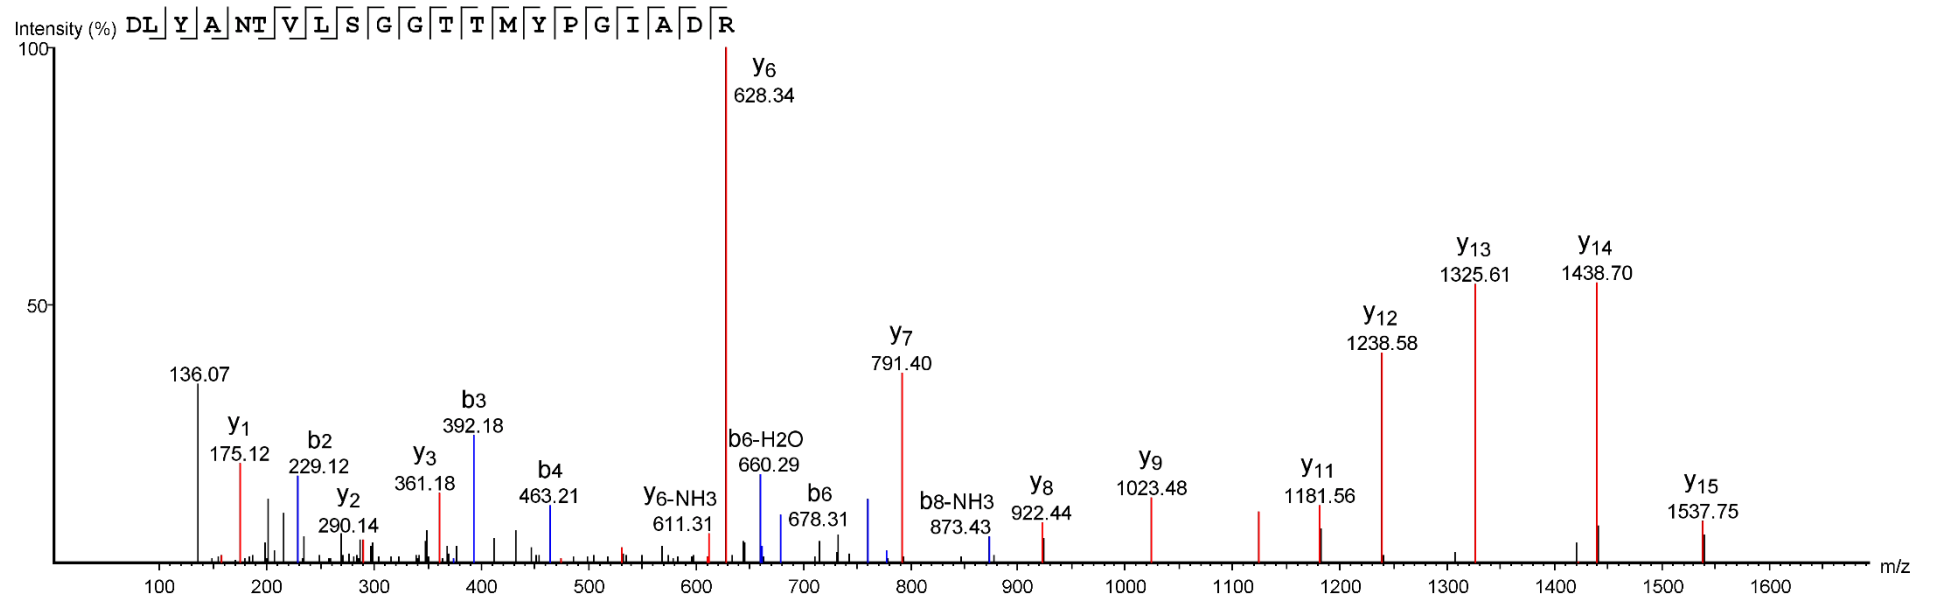

YMT42

Scan #20913

A-119: ACTB<sub>(292-312)</sub>: DLYANTVLSGGTTM(+15.99)Y**P**GIADR

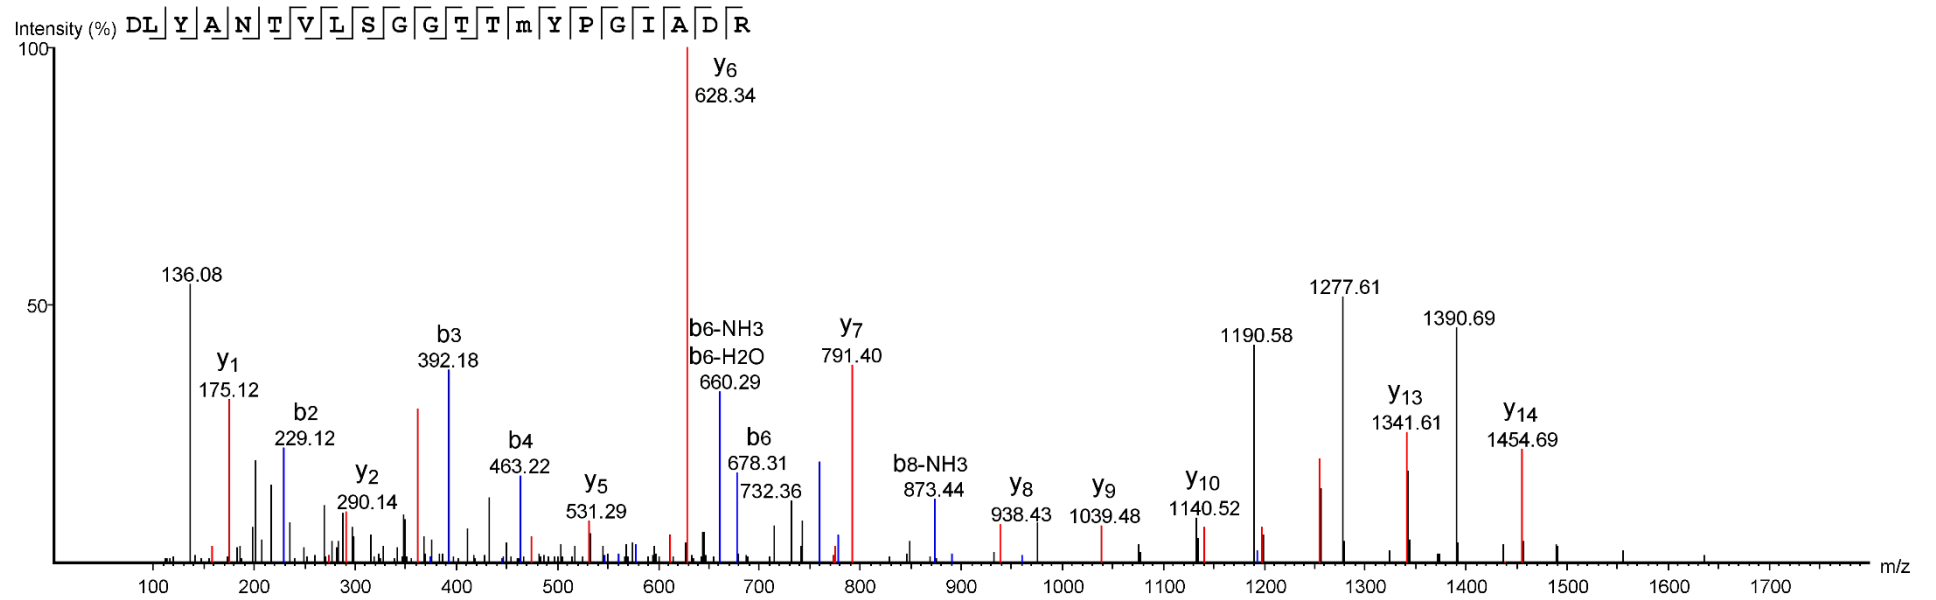

YMT41

Scan #18734

A-120: ACTB<sub>(292-312)</sub>: DLYANTVLSGGTTM(+15.99)Y<sup>P</sup>GIADR

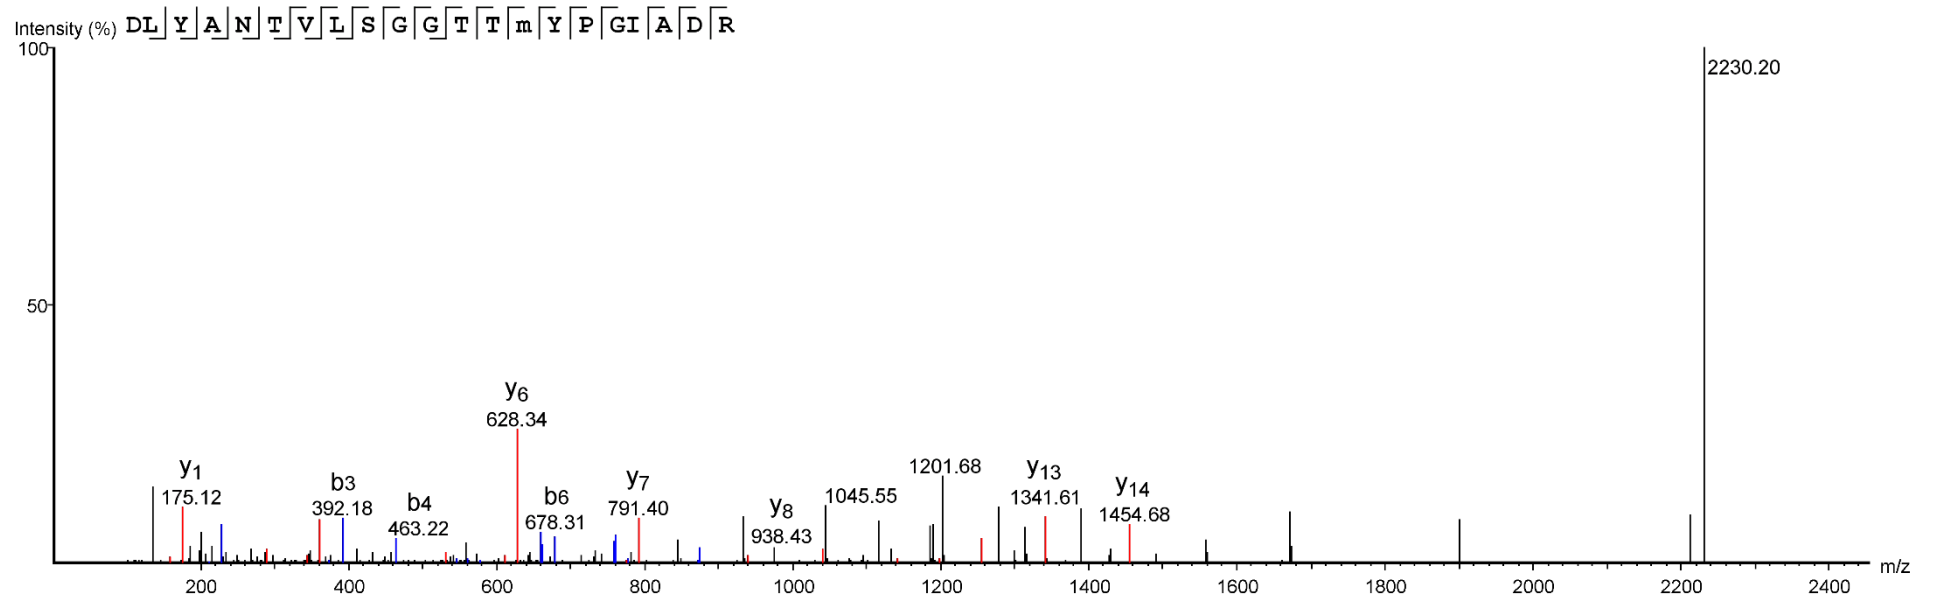

YMT42

Scan #19446



A-121: ACTB<sub>(316-326)</sub>: EITALAPSTMK

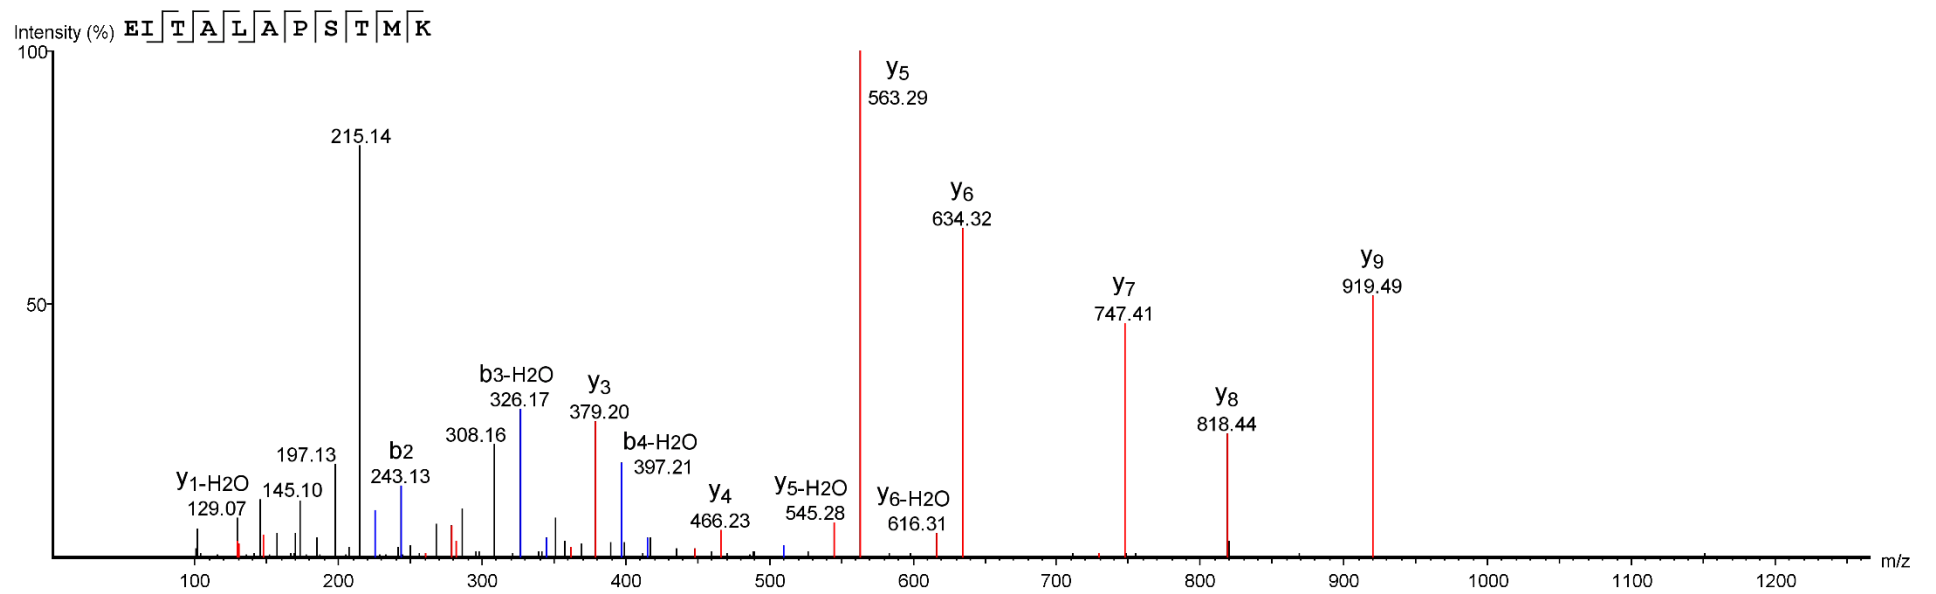

Pep20

Scan #5455

A-122: ACTB<sub>(316-326)</sub>: EITALAP(+15.99)STMK

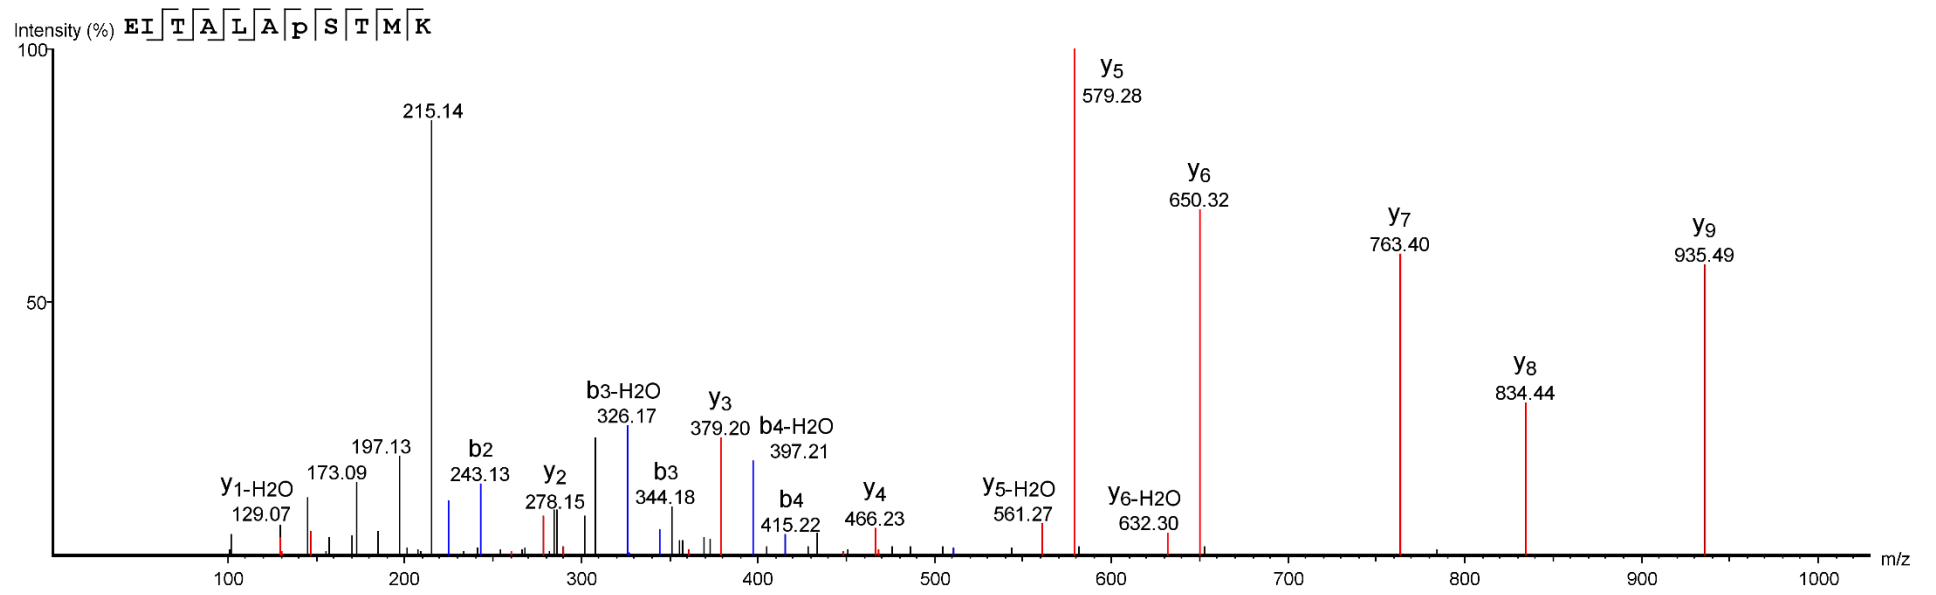

Pep20

Scan #4813

A-123: ACTB<sub>(316-326)</sub>: EITALAPSTM(+15.99)K

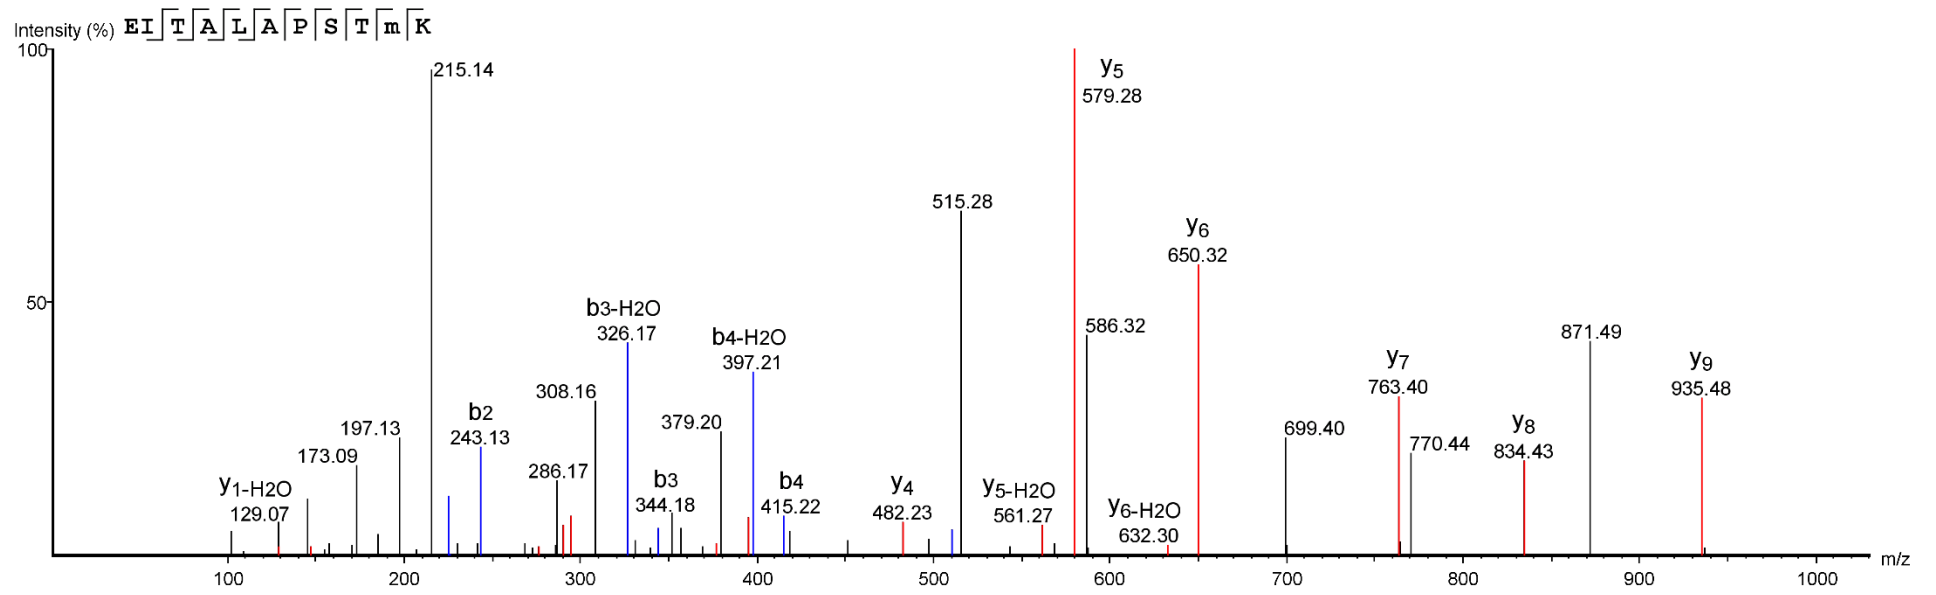

Pep20

Scan #4594

A-124: ACTB<sub>(316-326)</sub>: EITALAP(+15.99)STM(+15.99)K

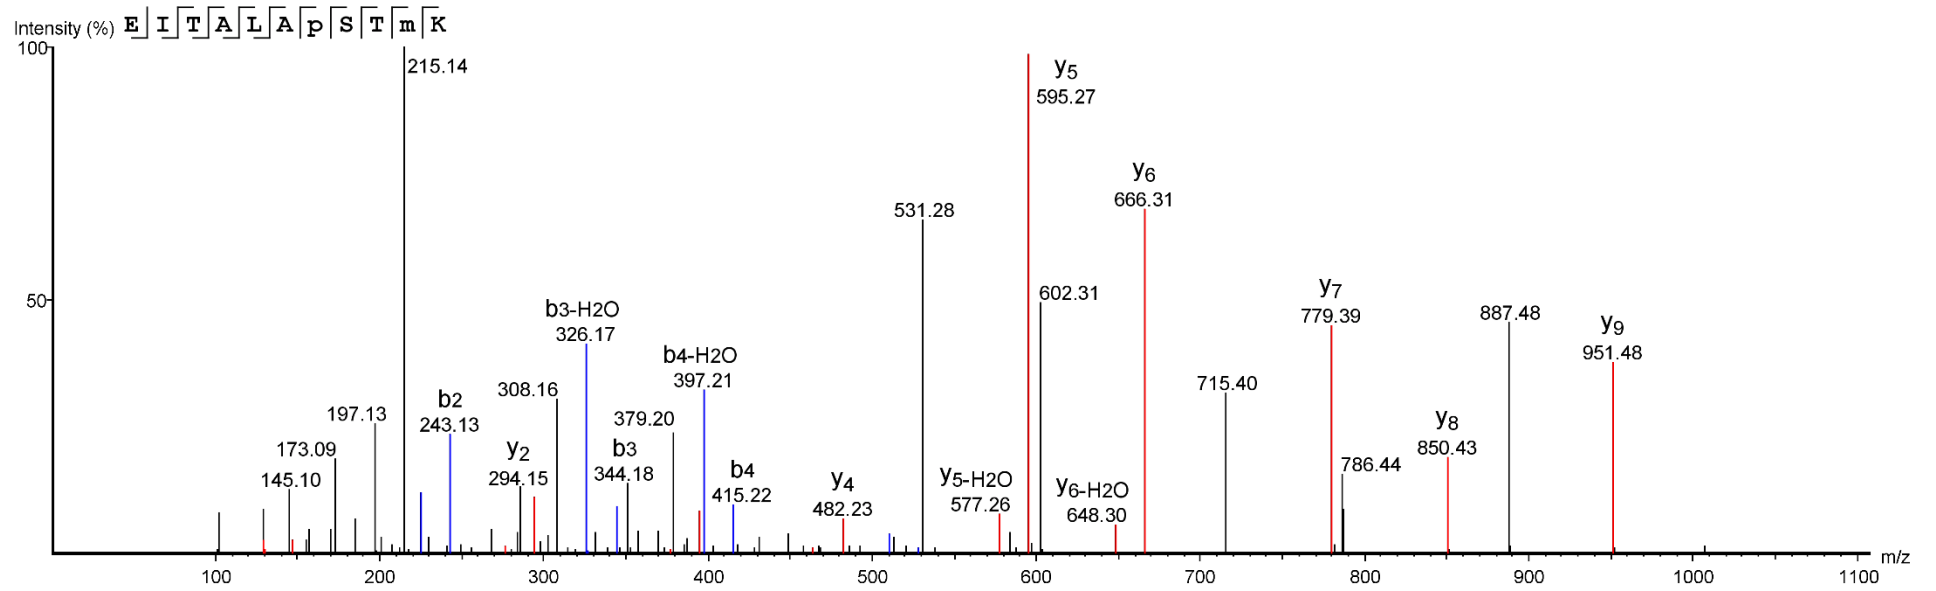

Pep20

Scan #4047

A-125: ACTB<sub>(316-326)</sub>: EITALAPSTMK

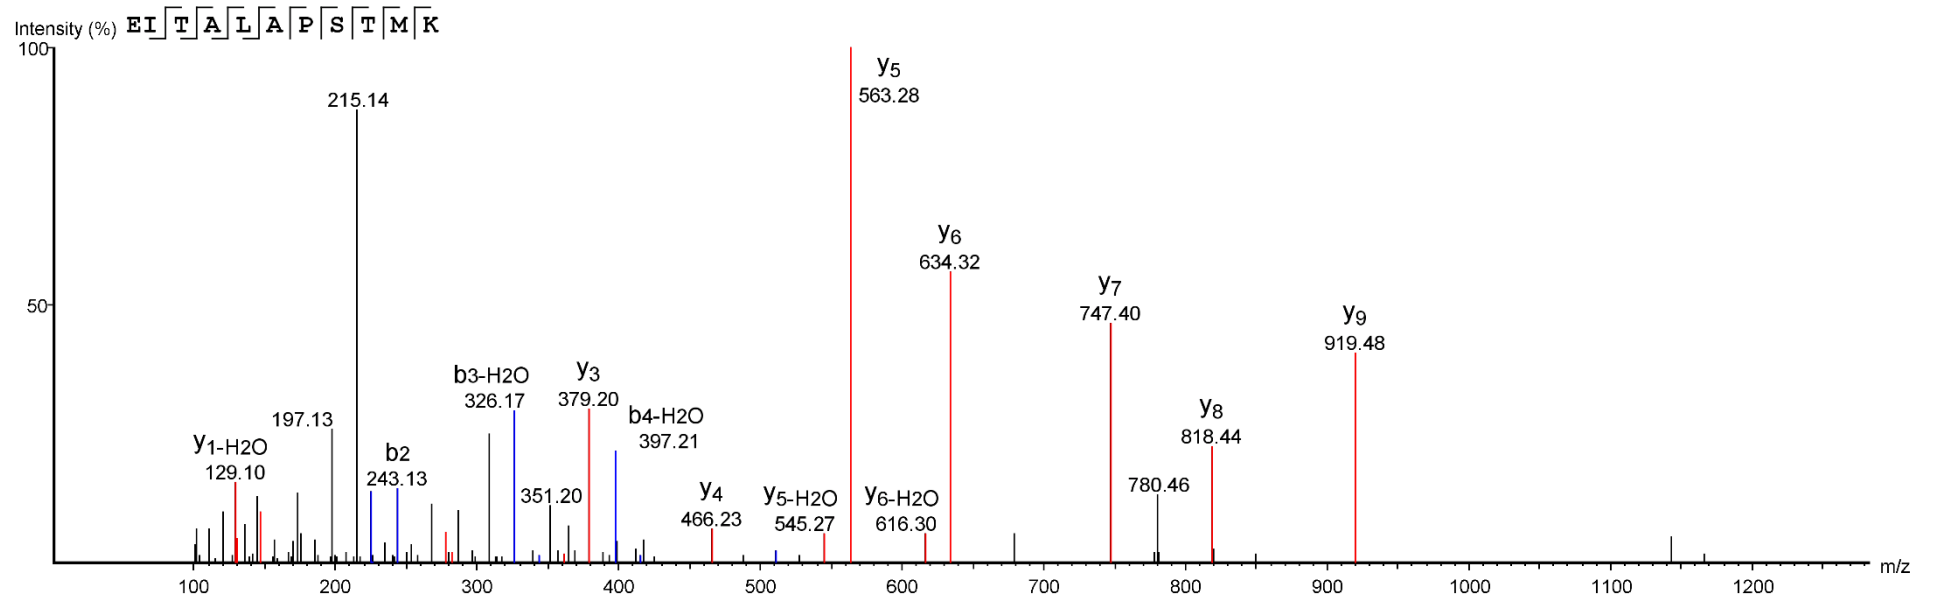

YMT41

Scan #11523

A-126: ACTB<sub>(316-326)</sub>: EITALAPSTMK

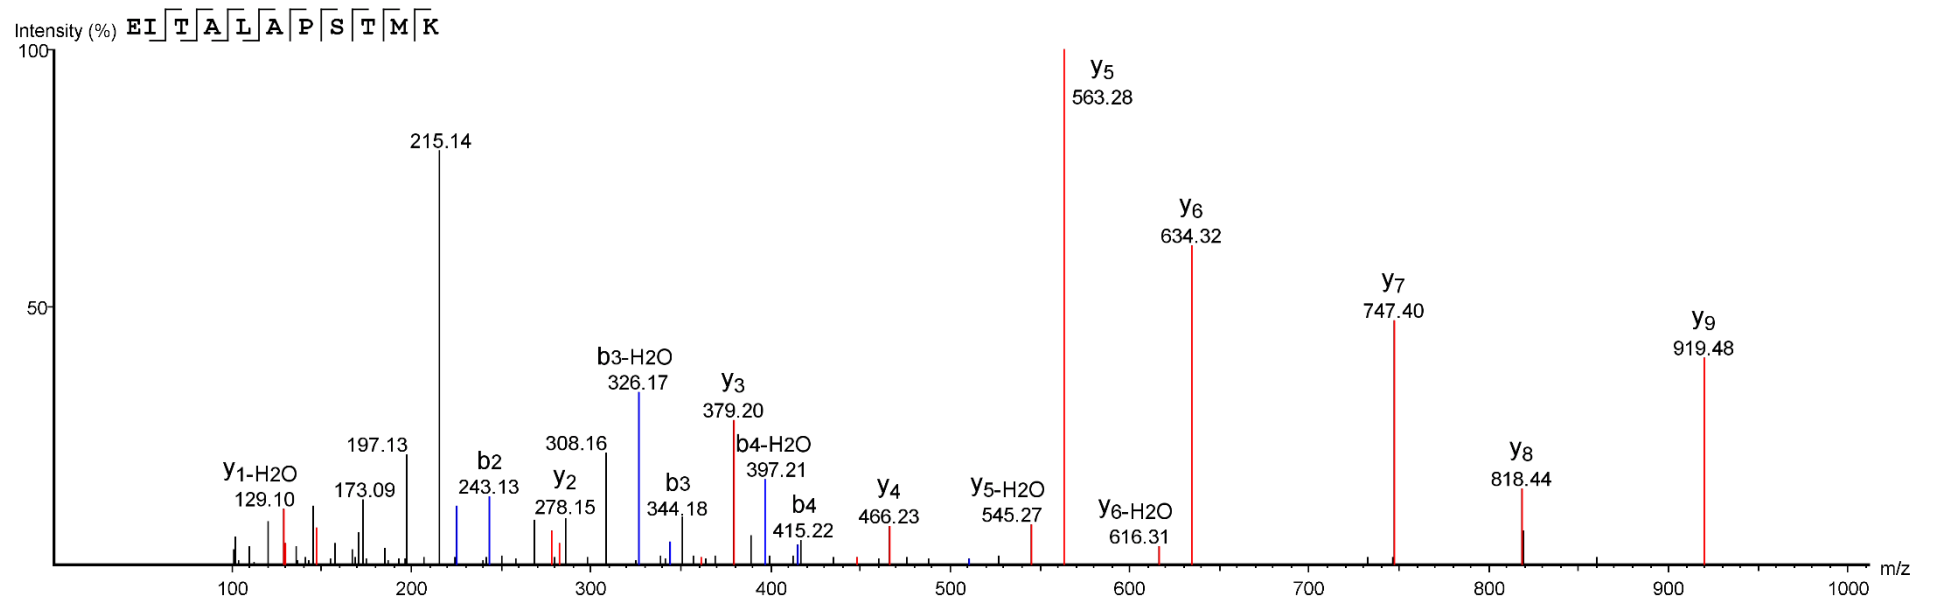

YMT42

Scan #11329

A-127: ACTB<sub>(316-326)</sub>: EITALAPSTM(+15.99)K

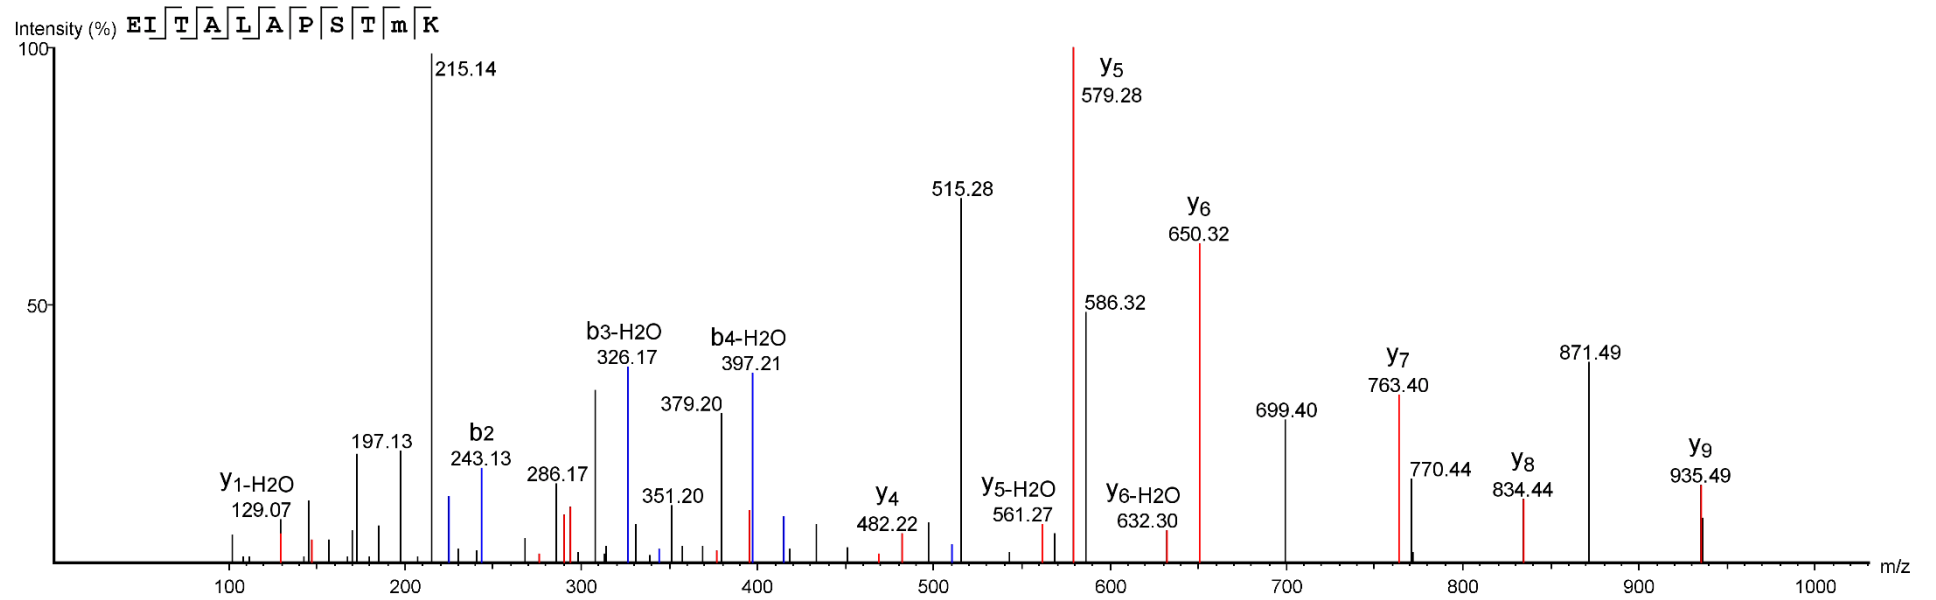

YMT41

Scan #8734

A-128: ACTB<sub>(316-326)</sub>: EITALAPSTM(+15.99)K

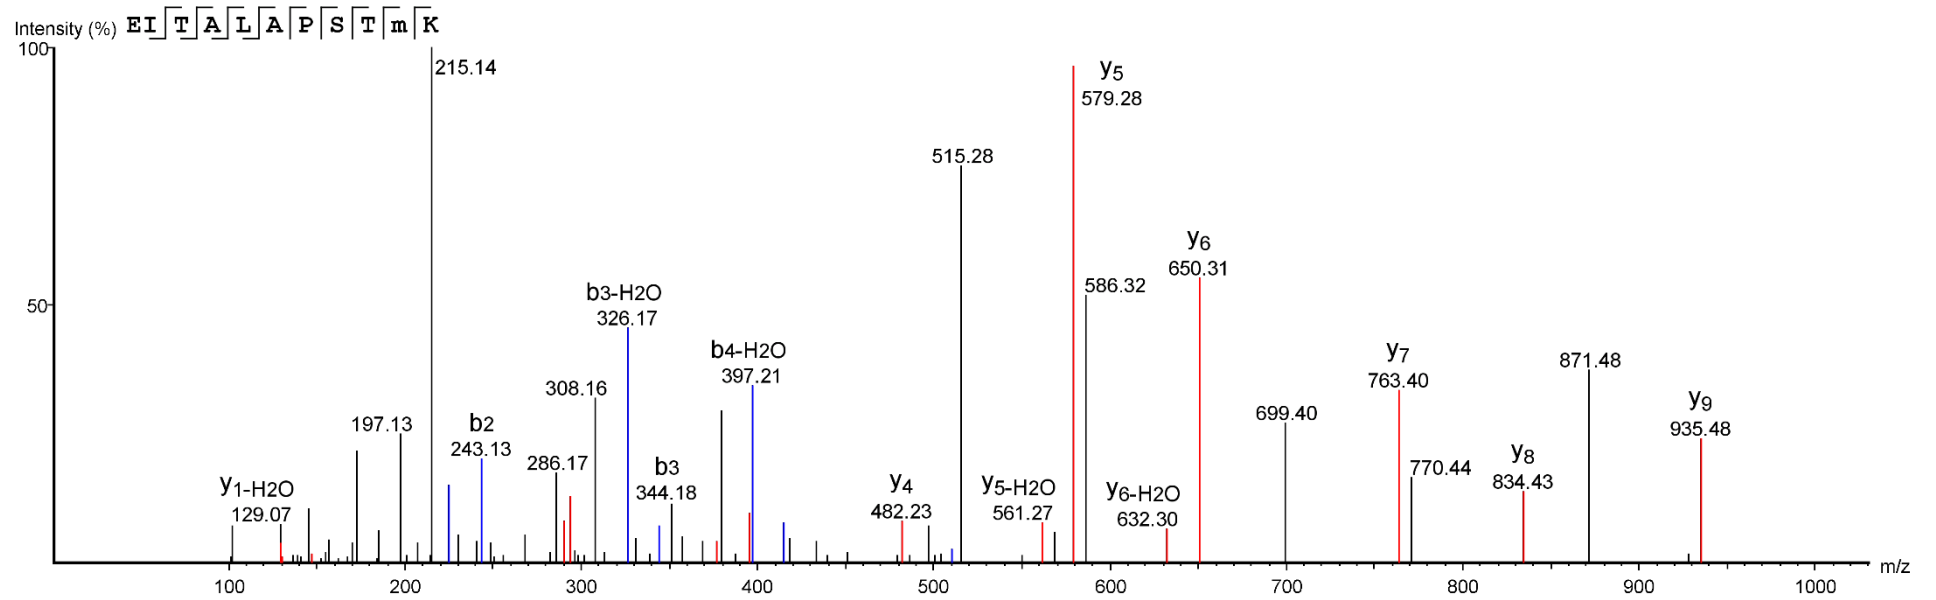

YMT42

Scan #8481



A-129: ADRB2<sub>(376-404)</sub>: LLC(+57.02)EDLPGT~~EDFVGHQGTVP~~SDNID~~SQGR~~+

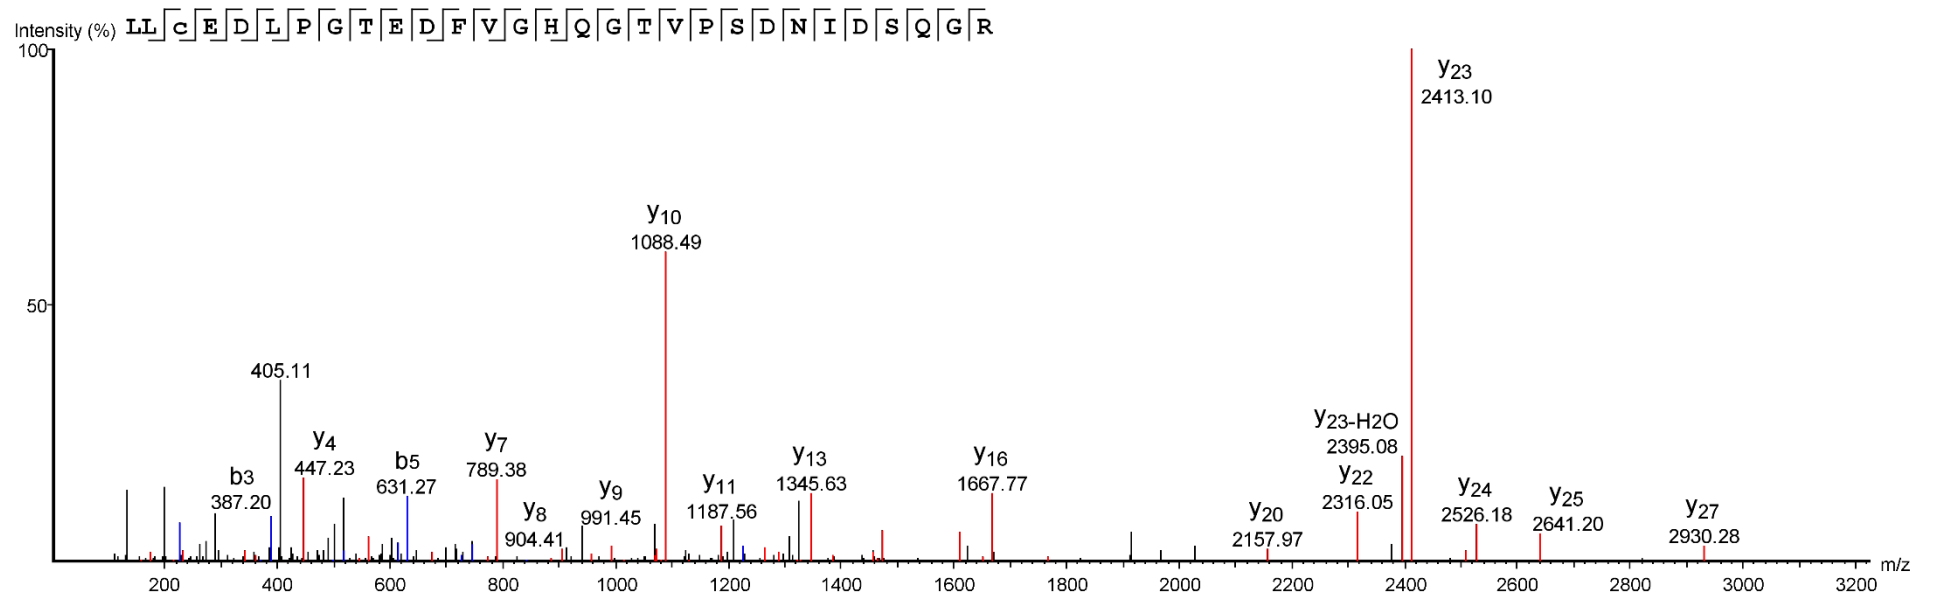

Pep11

Scan #14519

A-130: ADRB2<sub>(376-404)</sub>: LLC(+57.02)EDLP(+15.99)GTEDFVGHQGTVPSDNIDSQGR+

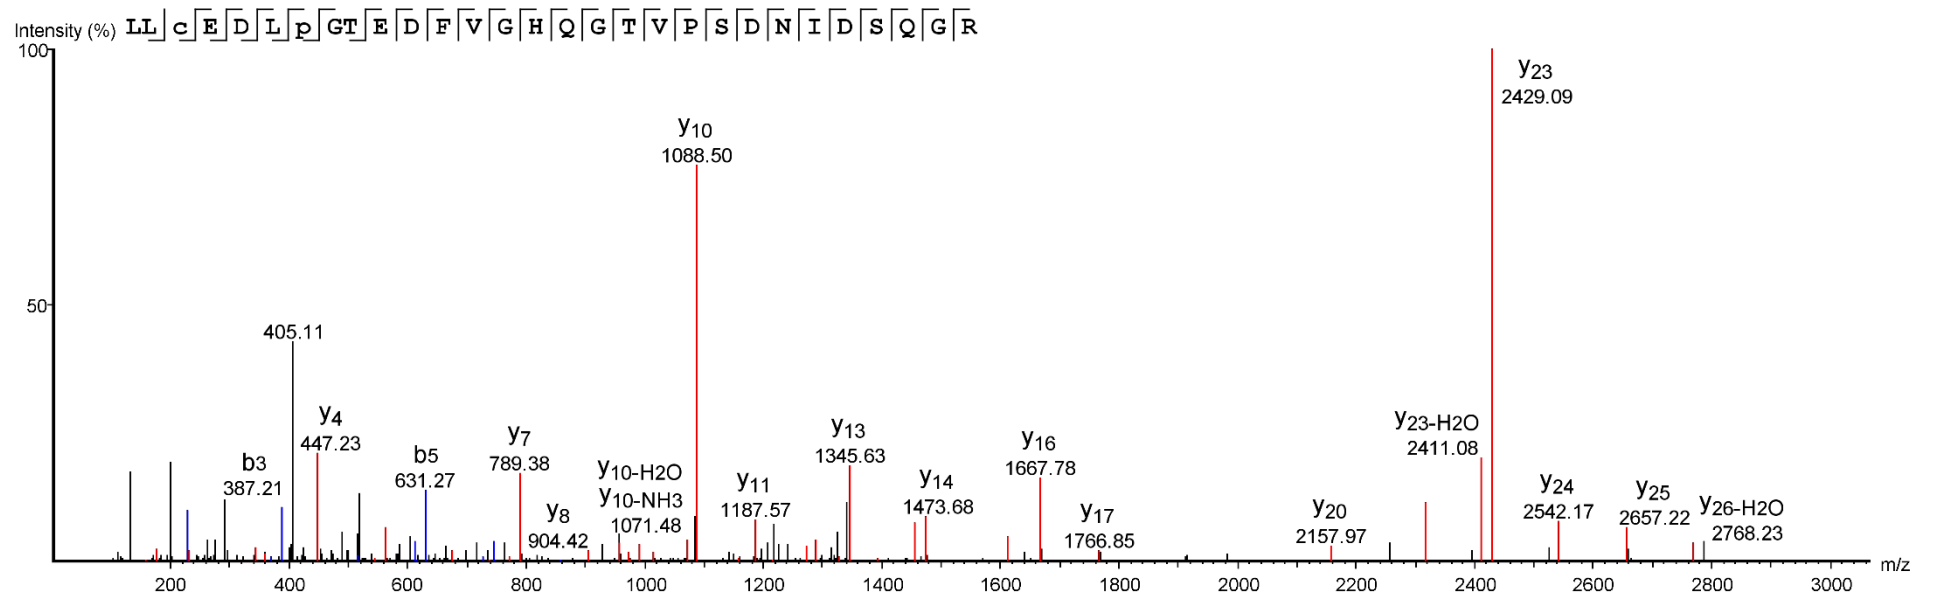

Pep11

Scan #13797

A-131: ADRB2<sub>(376-404)</sub>: LLC(+57.02)EDLPGTEDFVGHQGTVP(+15.99)SDNIDSQGR+

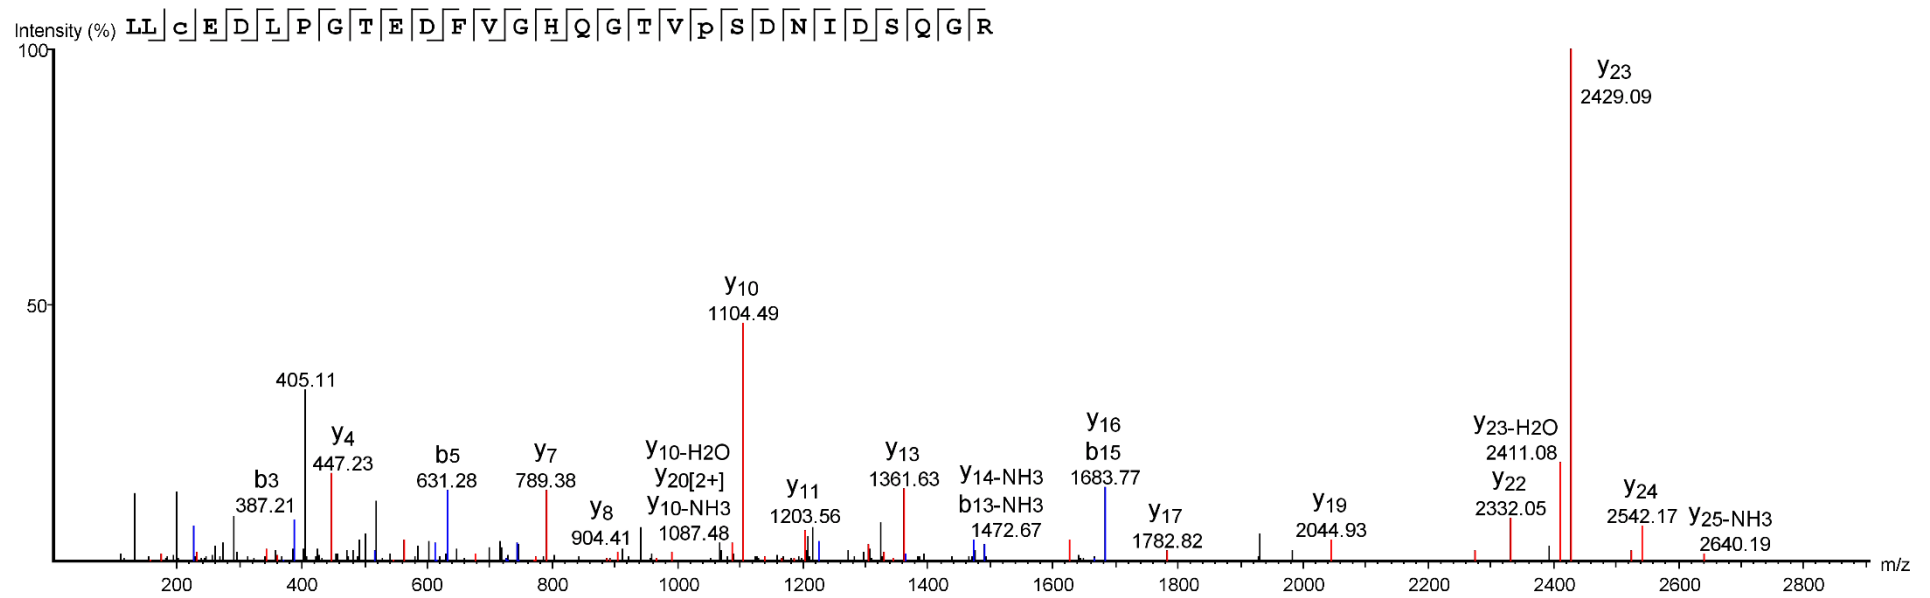

Pep11

Scan #13989

A-132: ADRB2<sub>(376-404)</sub>: LLC(+57.02)EDLP(+15.99)GTEDFVGHQGTVP(+15.99)SDNIDSQGR+

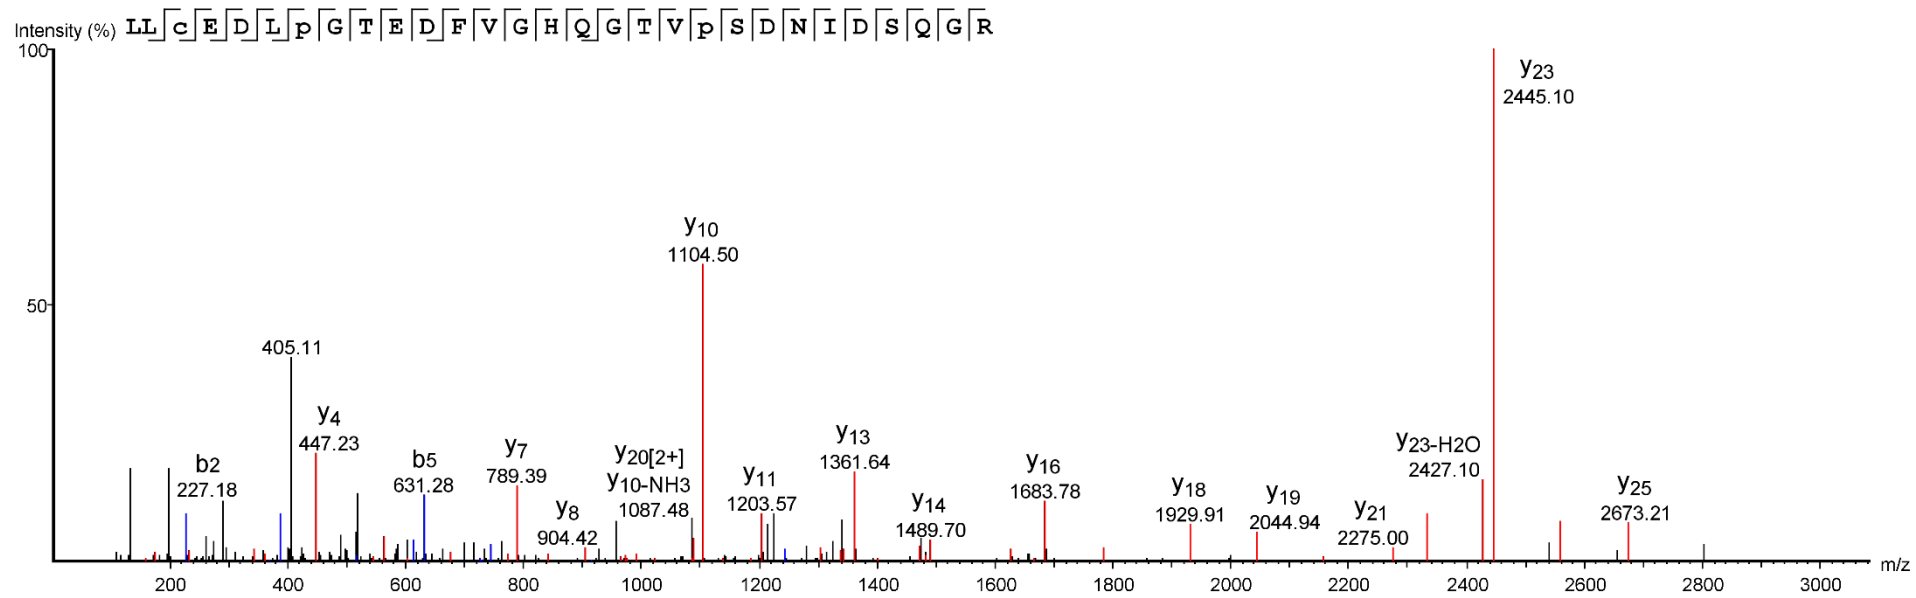

Pep11

Scan #13301

A-133: ADRB2<sub>(376-404)</sub>: LLC(+57.02)EDLPGTDFVGHQGTVPDNI D S Q GR+

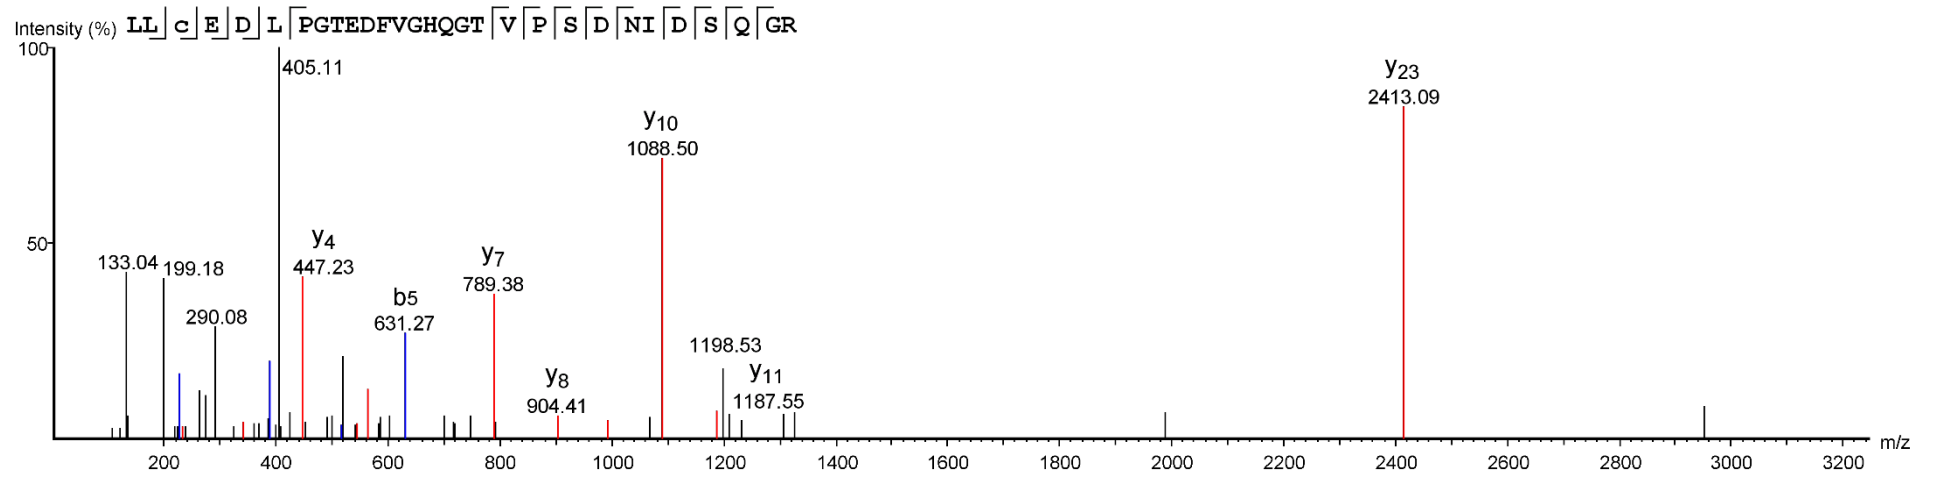

YMT65

Scan #14574

A-134: ADRB2<sub>(376-404)</sub>: LLC(+57.02)EDLPGTDFVGHQGTVPDNI D S QGR+

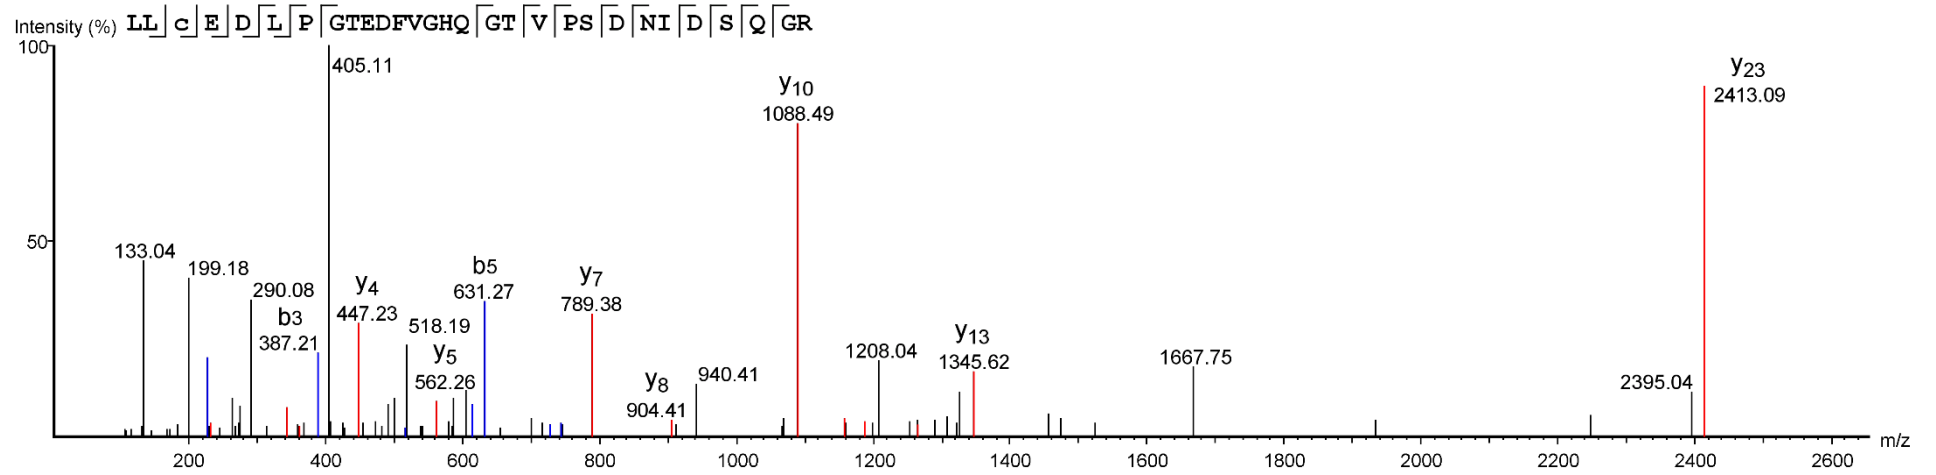

YMT66

Scan #14387

A-135: ADRB2<sub>(376-404)</sub>: LLC(+57.02)ED(+15.99)LPGTEDFVGHQGTVP<sup>PS</sup>DNIDSQGR+

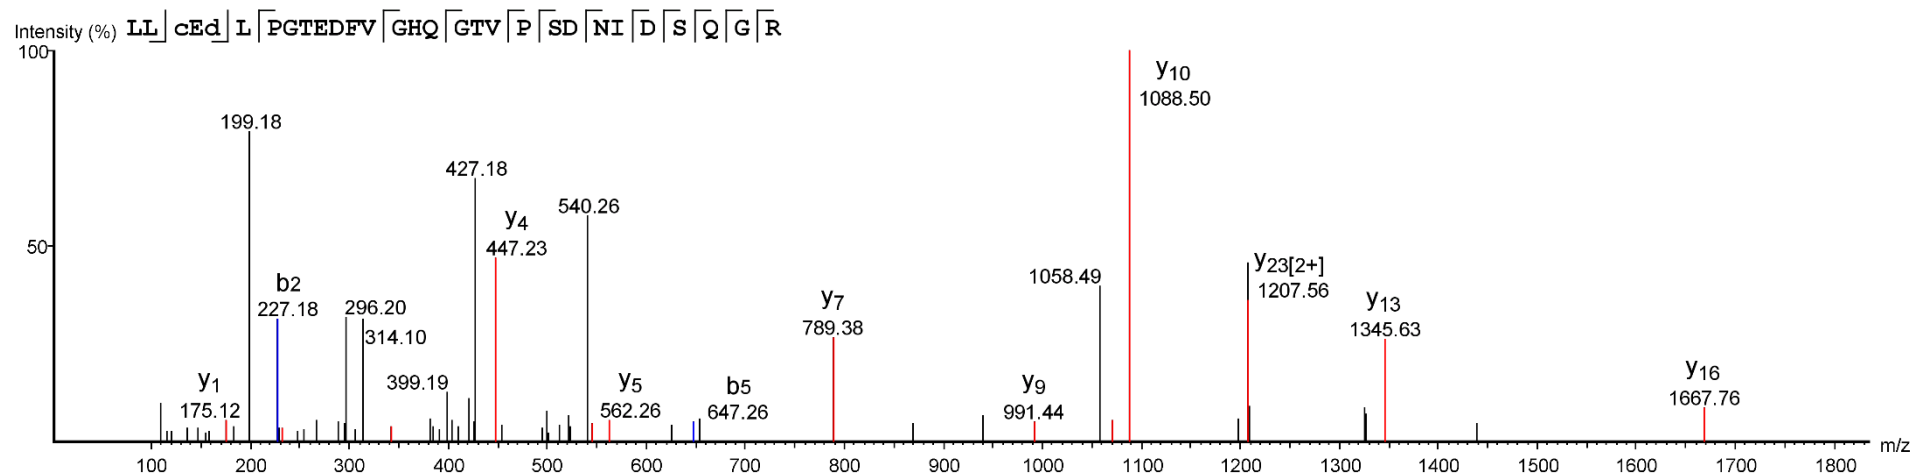

YMT65

Scan #14273

A-136: ADRB2<sub>(376-404)</sub>: LLC(+57.02)ED(+15.99)LPGTEDFVGHQGTVP<sup>PSDNIDSQGR</sup>+

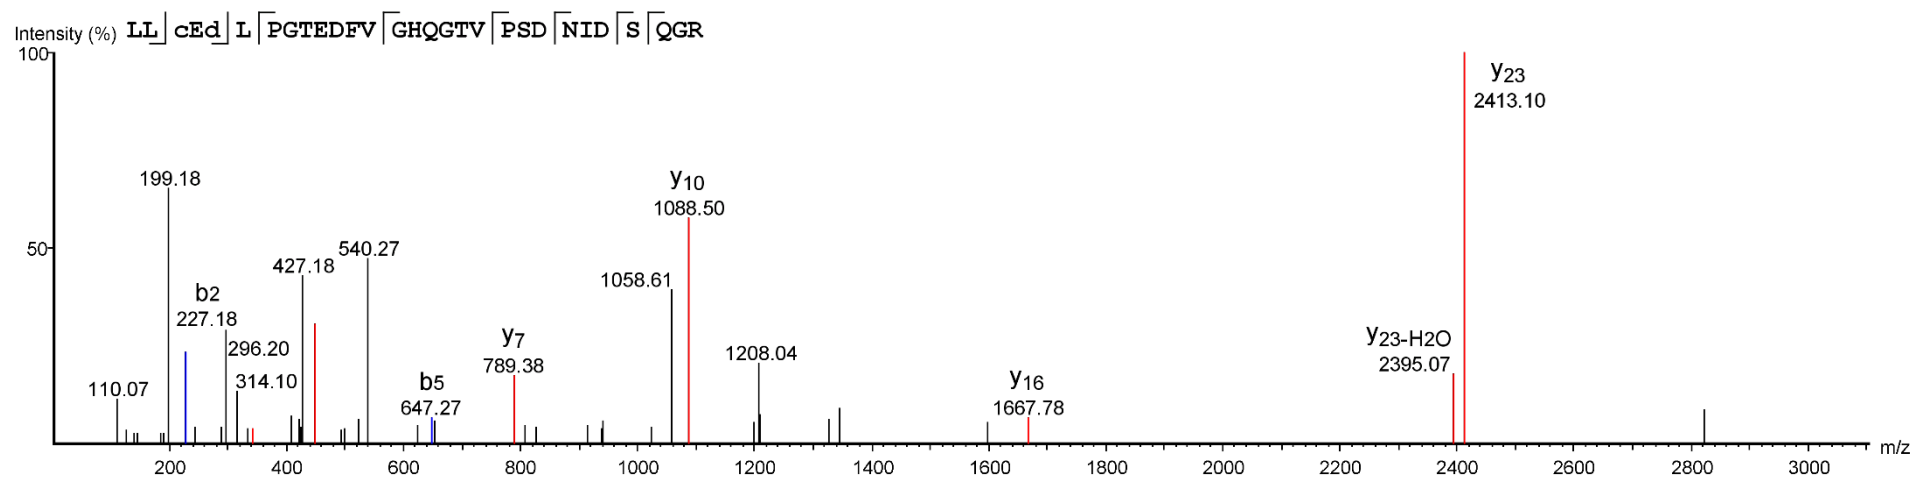

YMT66

Scan #13937



A-137: AKT1<sub>(122-140)</sub>: SGSPDNSGAEEMEVS LAK

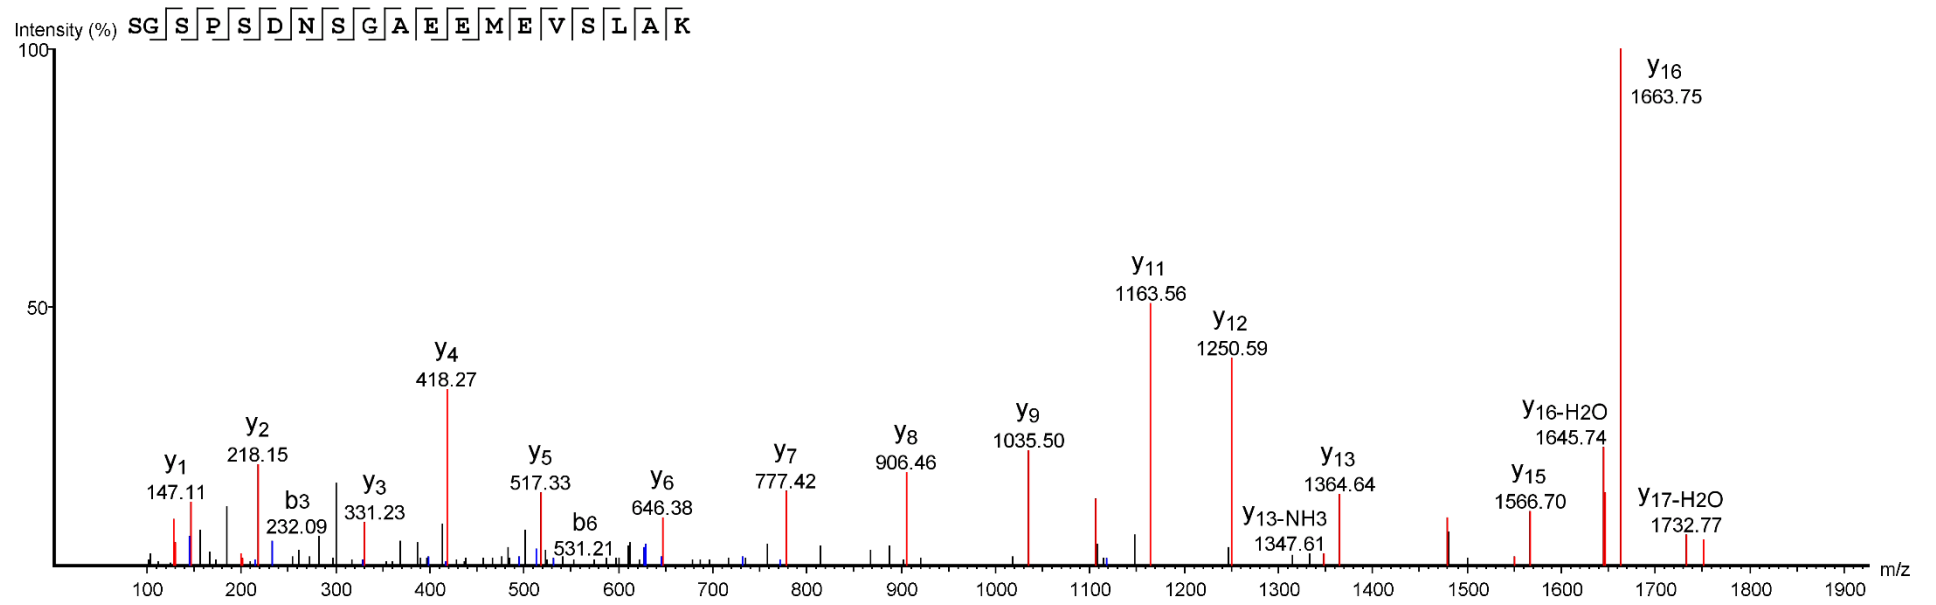

Pep17

Scan #9951

A-138: AKT1<sub>(122-140)</sub>: SGSP(+15.99)SDNSGAEEMEVS~~LAK~~

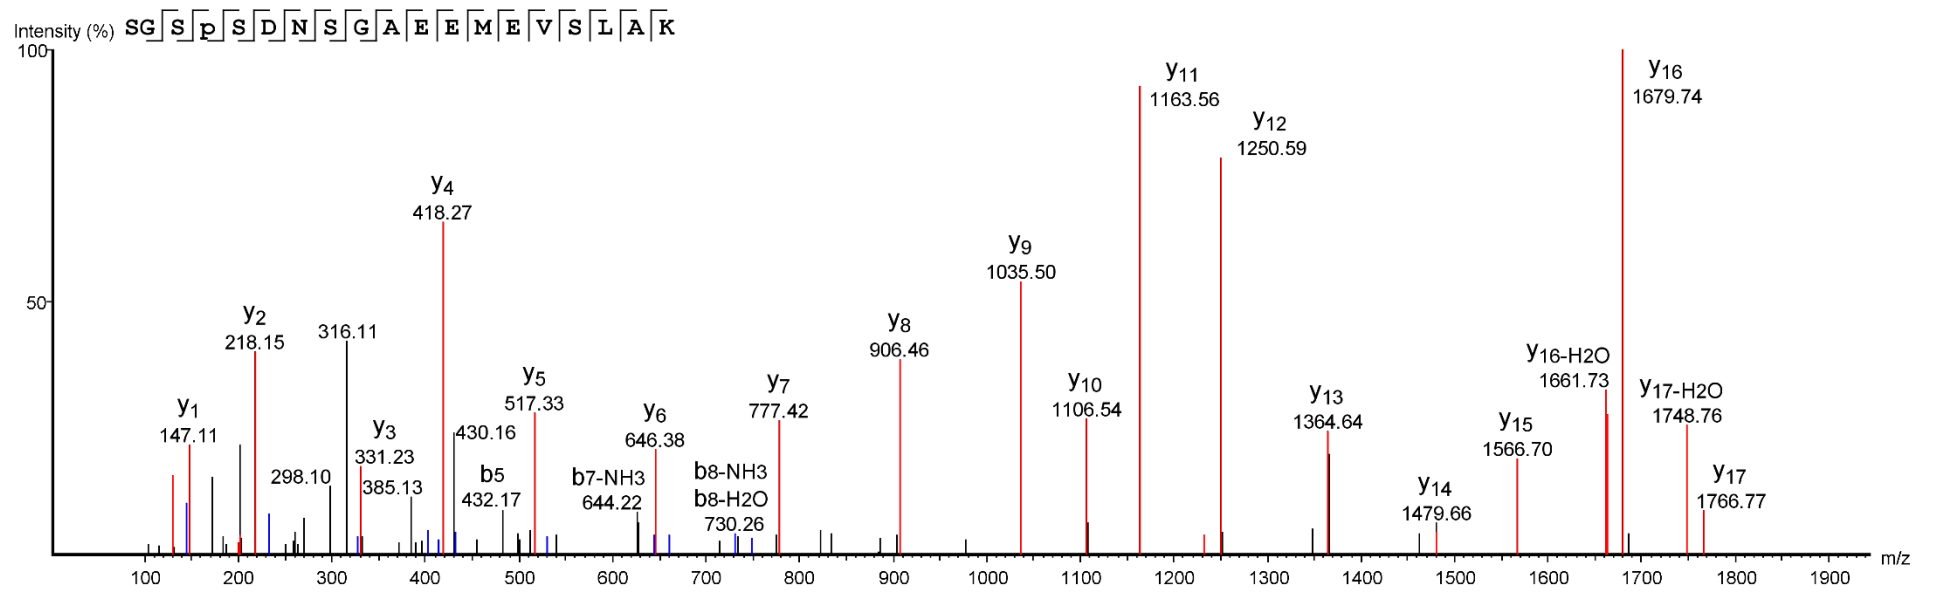

Pep17

Scan #9840

A-139: AKT1<sub>(122-140)</sub>: SGSPDNSGAEEmEVS<sup>LAK</sup>

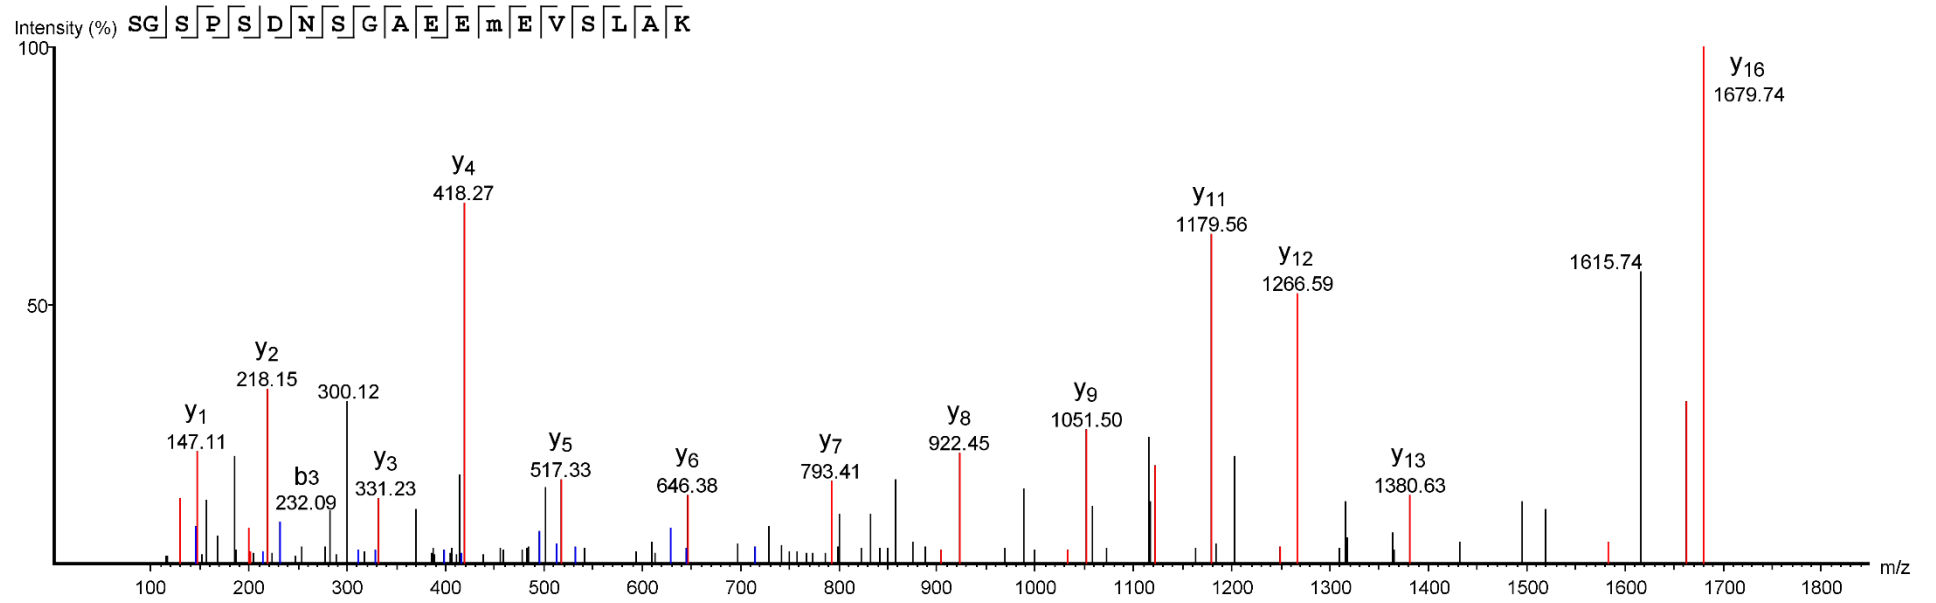

Pep17

Scan #6949

A-140: AKT1<sub>(122-140)</sub>: SGSP(+15.99)SDNSGAEEmEVS LAK

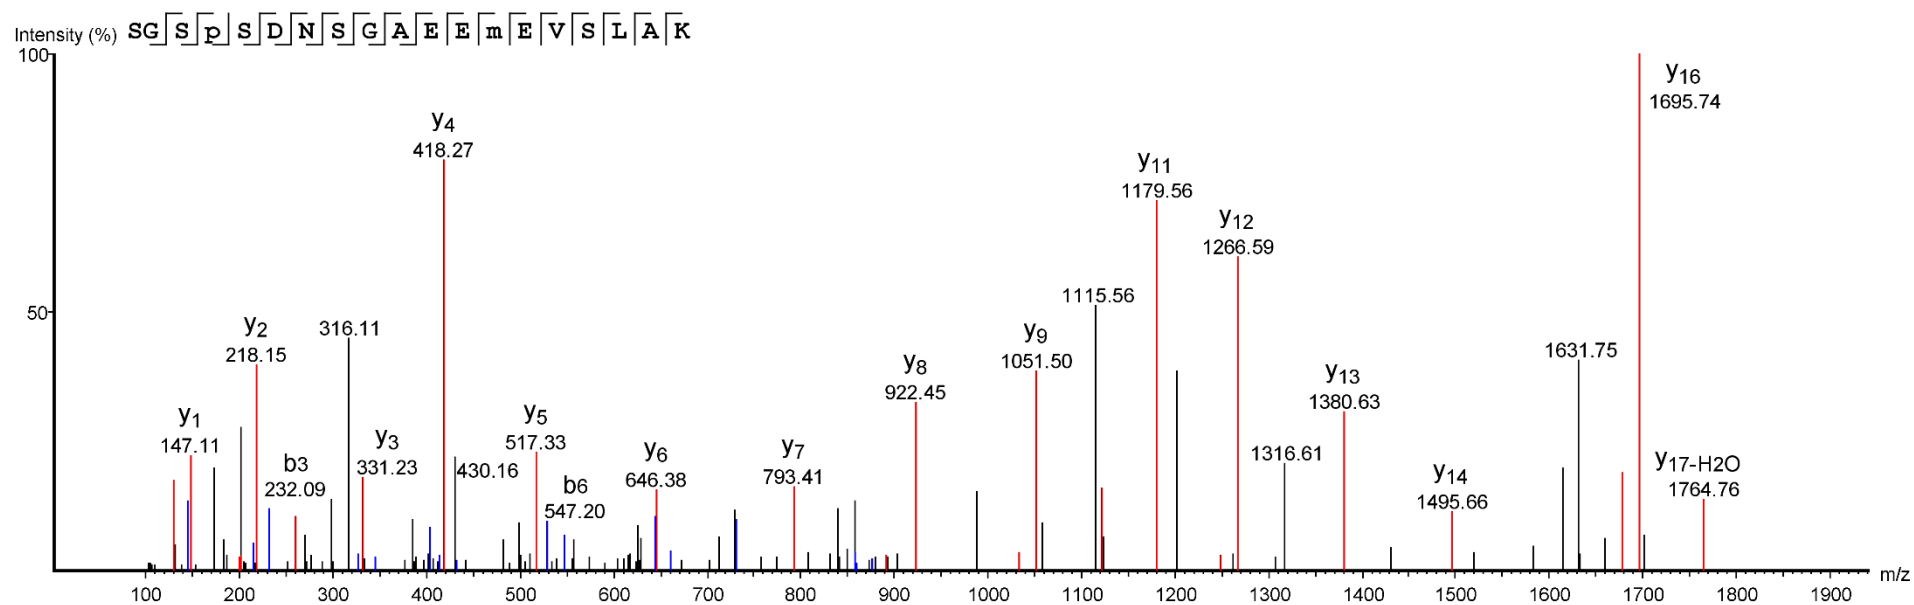

Pep17

Scan #6548

A-141: AKT1<sub>(122-140)</sub>: SGSPSDNSGAEEMEVSLAK

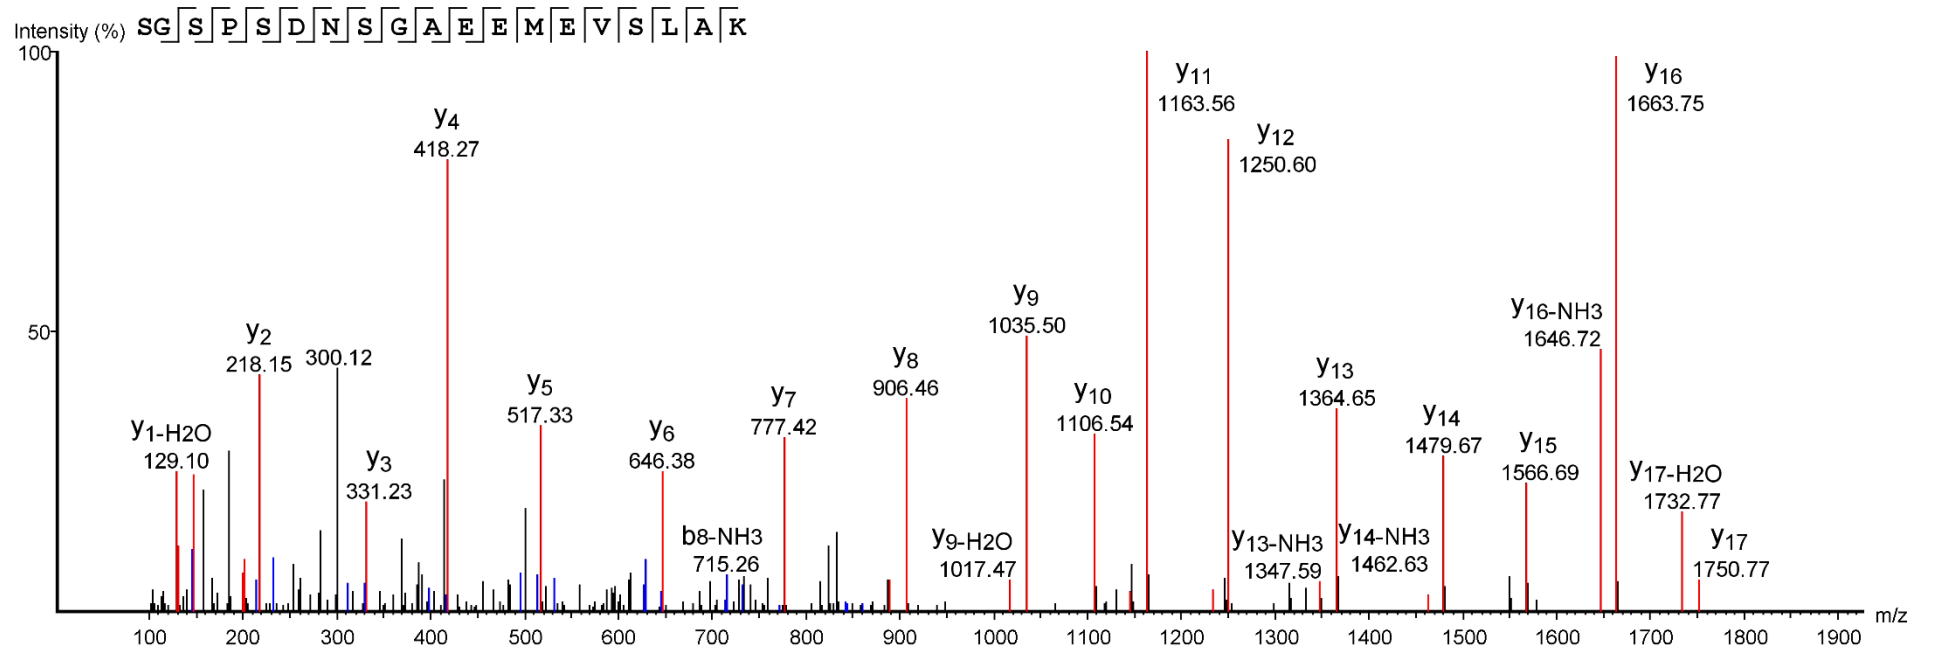

YMT83

Scan #12847

A-142: AKT1<sub>(122-140)</sub>: SGSPDNSGAEEMEVS<sup>+</sup>LA<sup>+</sup>K

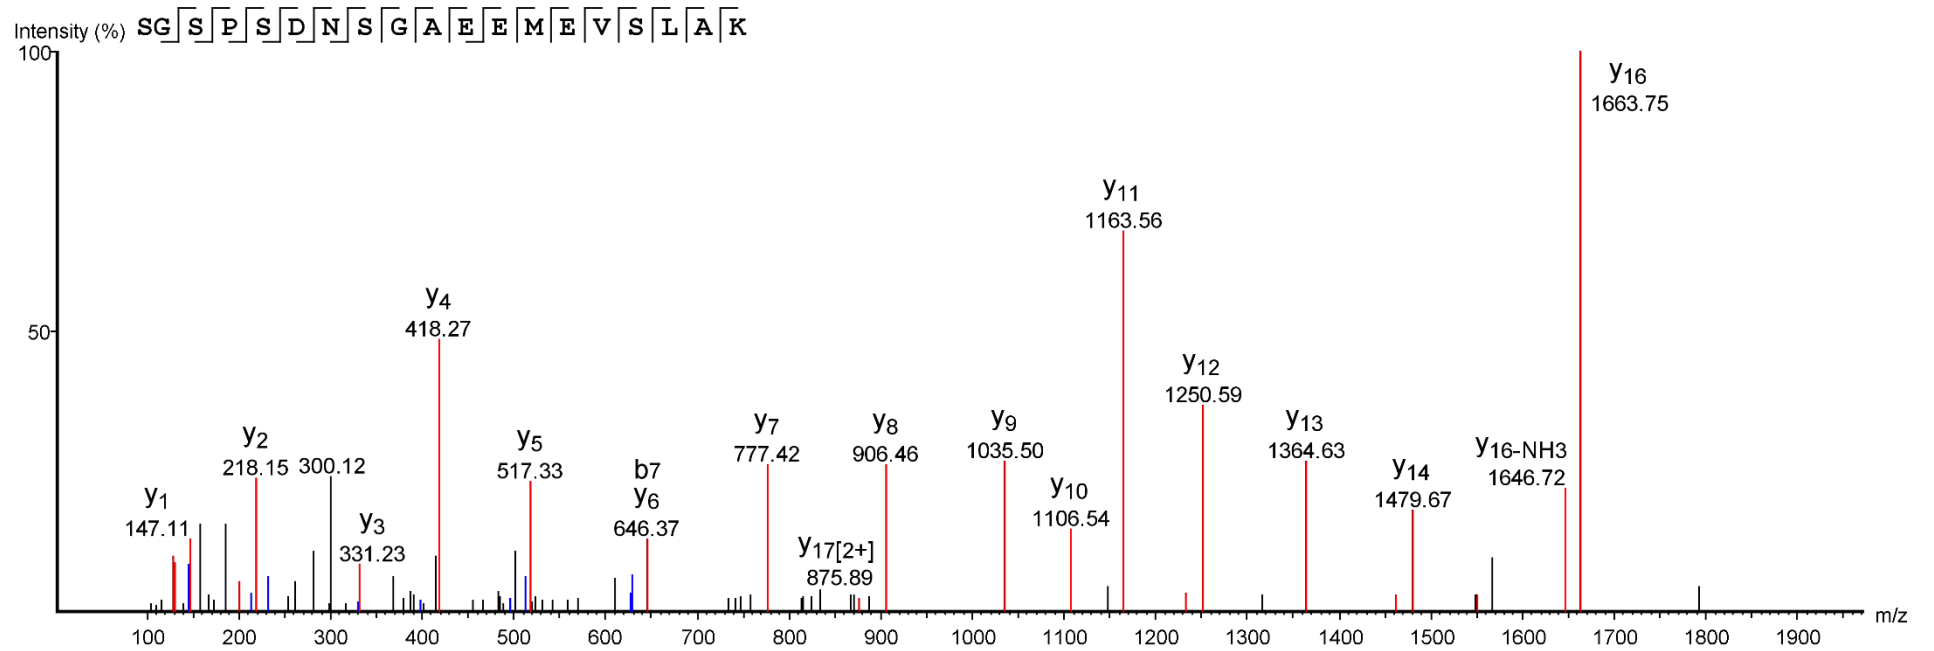

YMT84

Scan #12609

A-143: AKT1<sub>(122-140)</sub>: SGPSDNSGAEEmEVSLAK

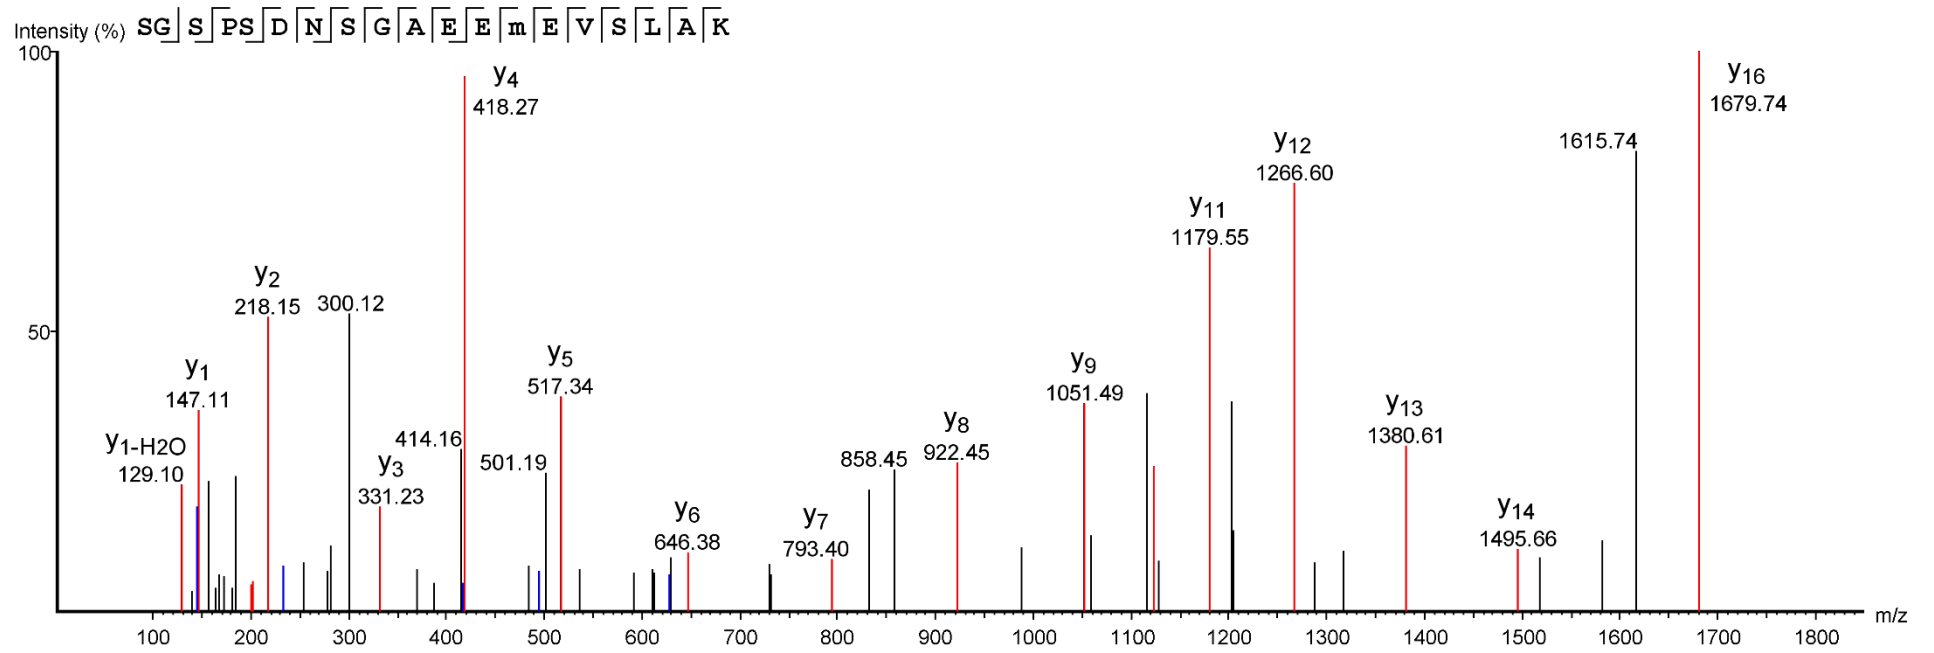

YMT83

Scan #8732

A-144: AKT1<sub>(122-140)</sub>: SGPSDNSGAEEmEVSLAK

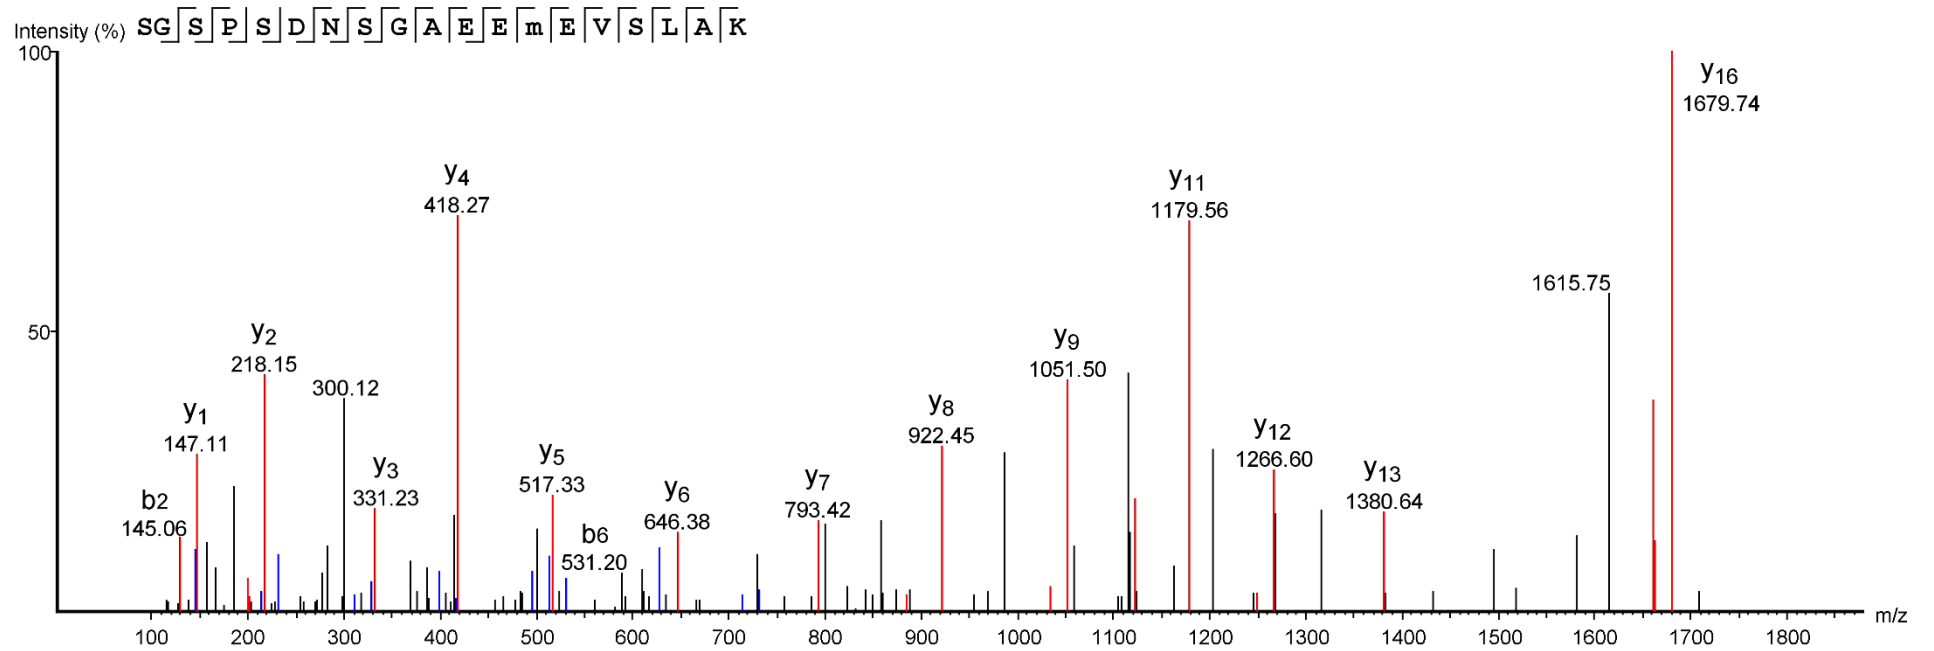

YMT84

Scan #8742



A-145: AKT1<sub>(308-328)</sub>: TFC(+57.02)GTPEYLAPEVLENDNDYGR

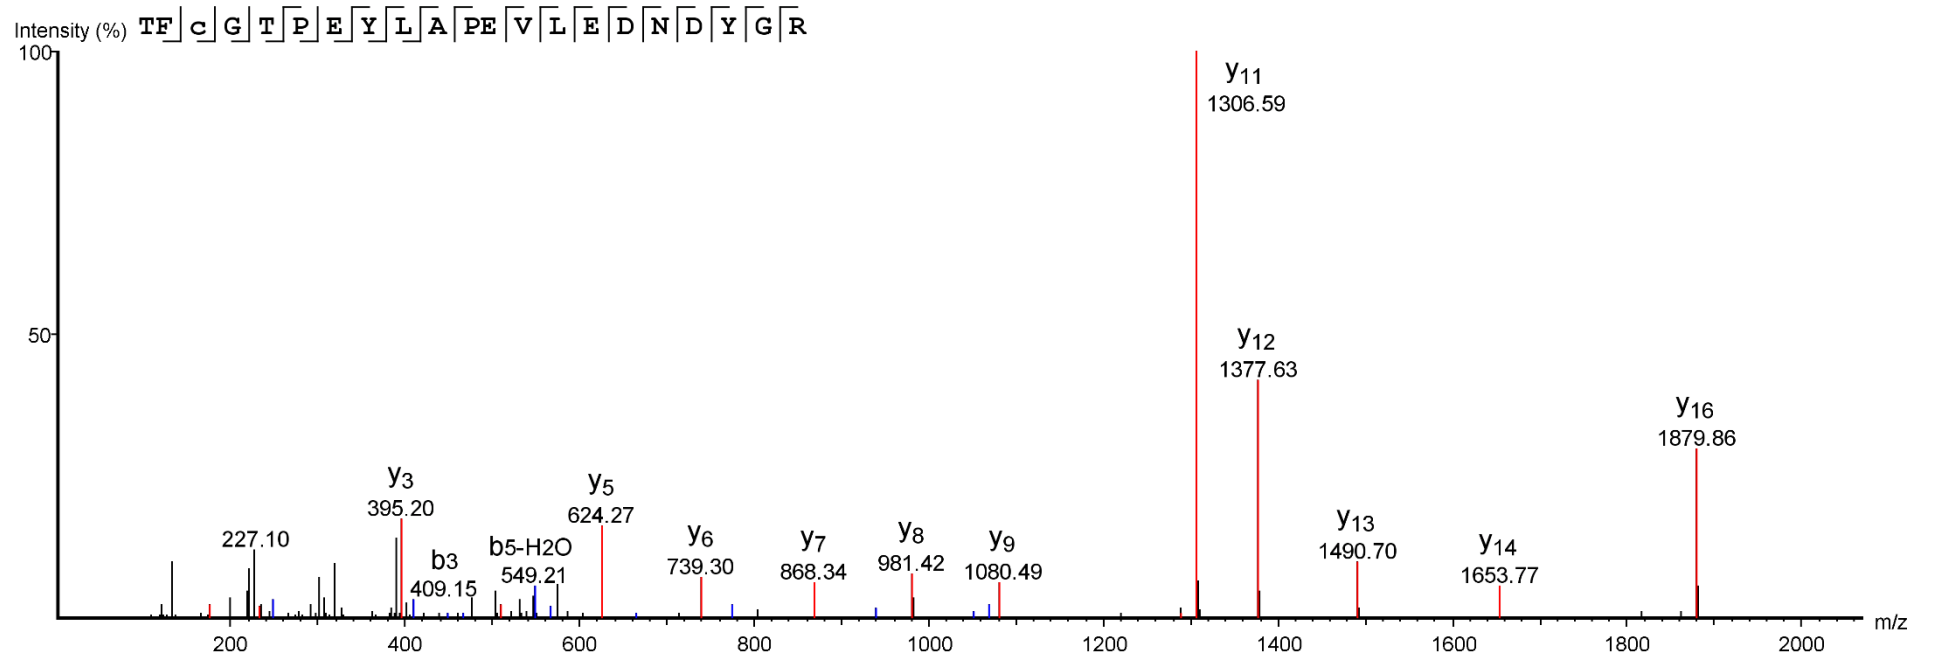

Pep17  
Scan  
#16799

A-146: AKT1<sub>(308-328)</sub>: TFC(+57.02)GTP(+15.99)EYLAPEVLEDNDYGR

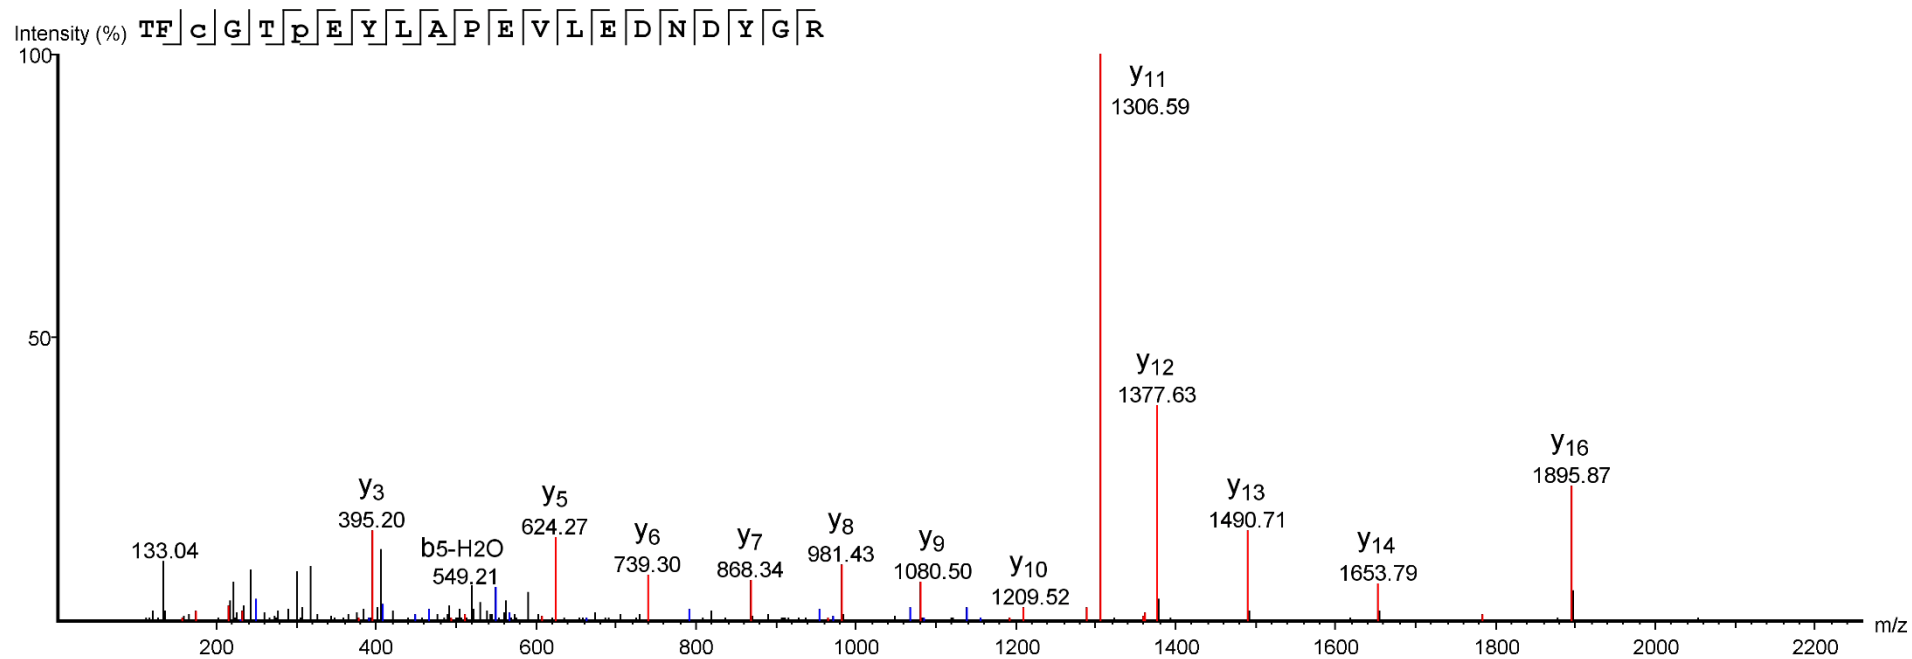

Pep17  
Scan  
#15407

A-147: AKT1<sub>(308-328)</sub>: TFC(+57.02)GTPEYLAP(+15.99)EVLEDNDYGR

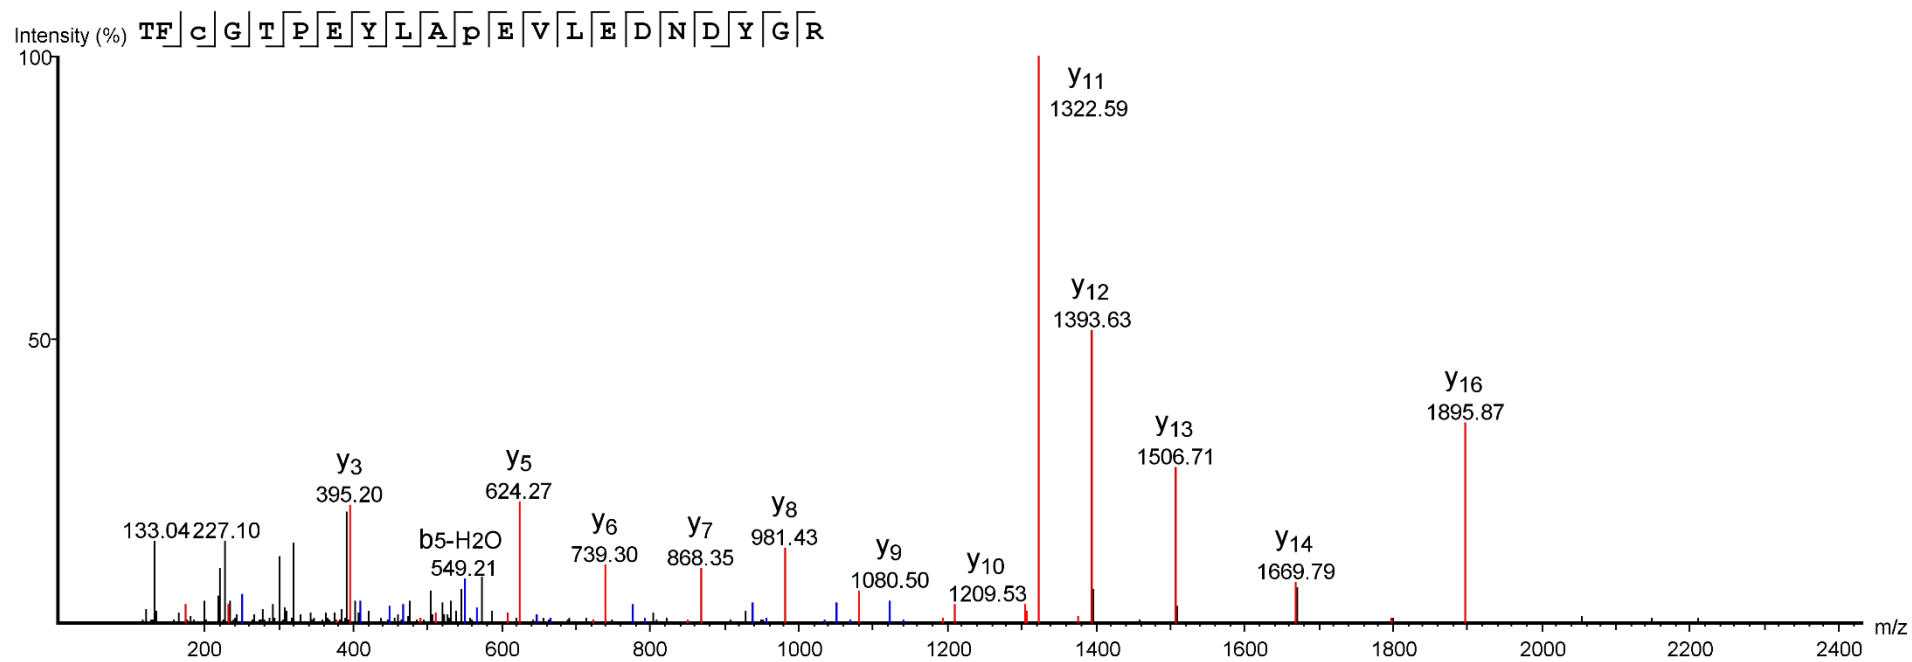

Pep17  
Scan  
#15119

A-148: AKT1<sub>(308-328)</sub>: TFC(+57.02)GTP(+15.99)EYLAP(+15.99)EVLEDNDYGR

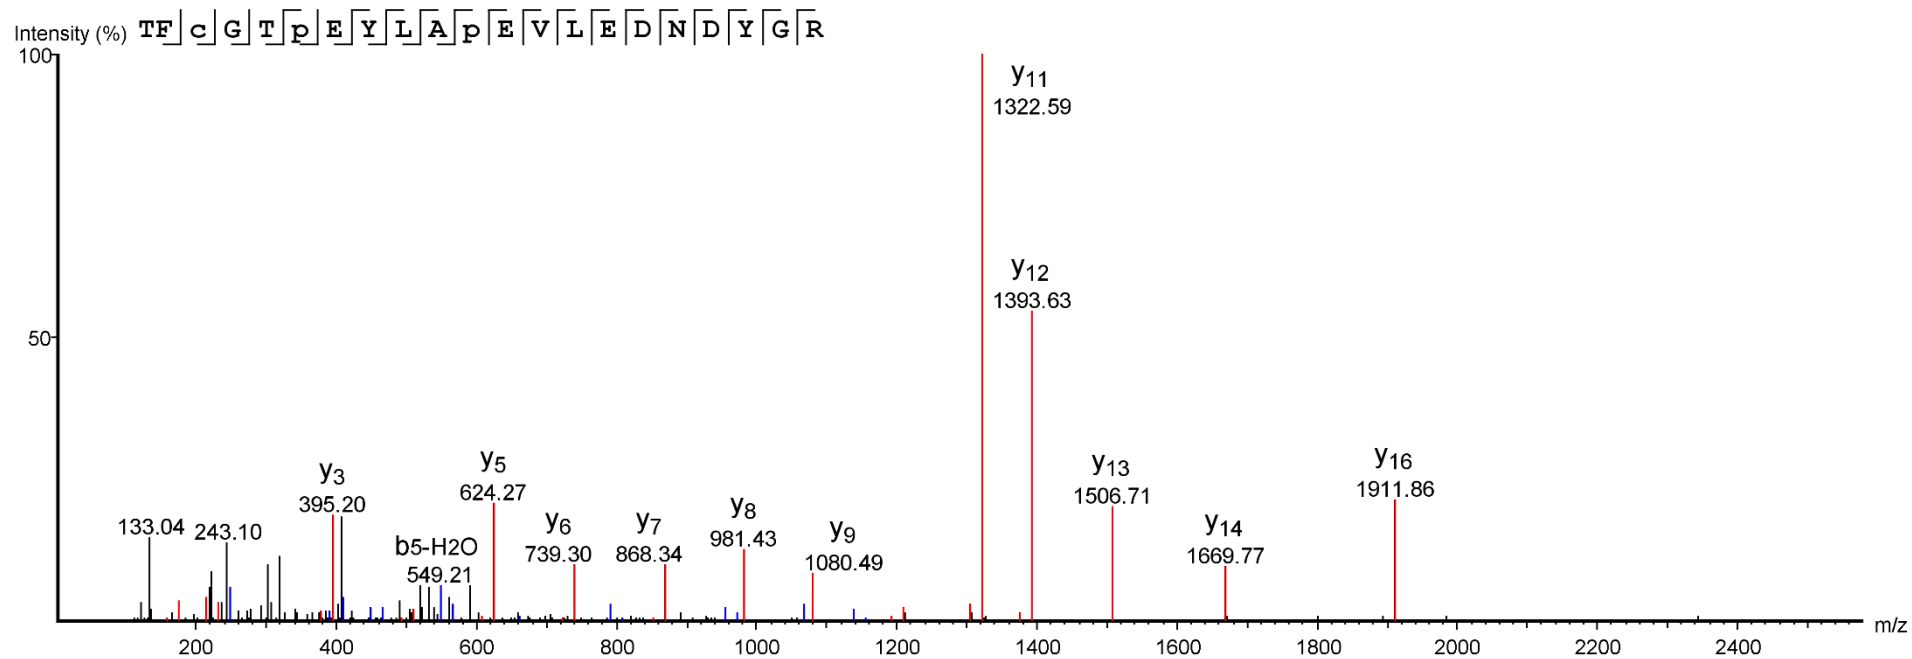

Pep17  
Scan  
#14031

A-151: AKT1<sub>(421-436)</sub>: LSPPFK**P**QVTSETDTR+

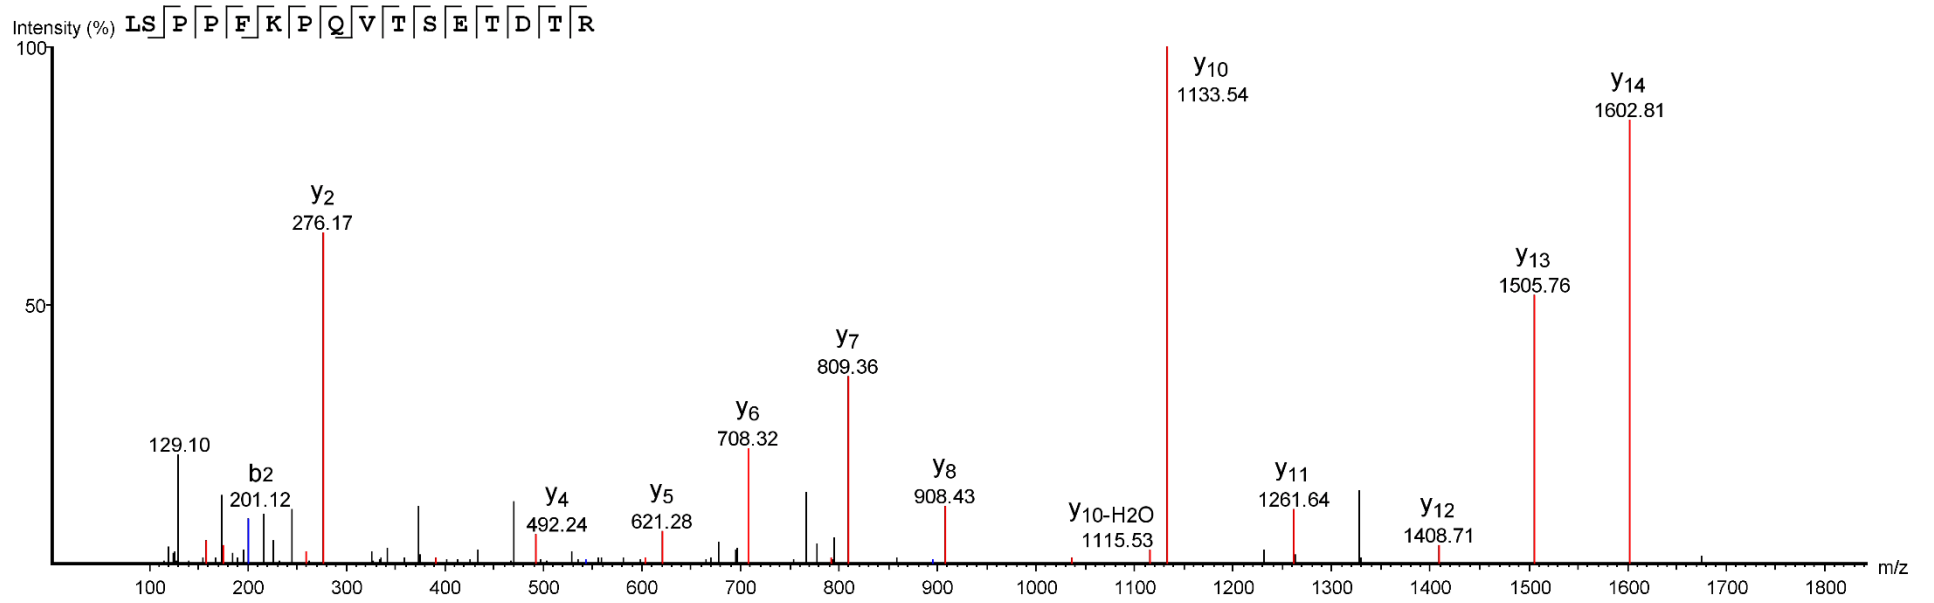

Pep17

Scan #8324

A-152: AKT1<sub>(421-436)</sub>: LSPPFK**P(+15.99)**QVTSETDTR+

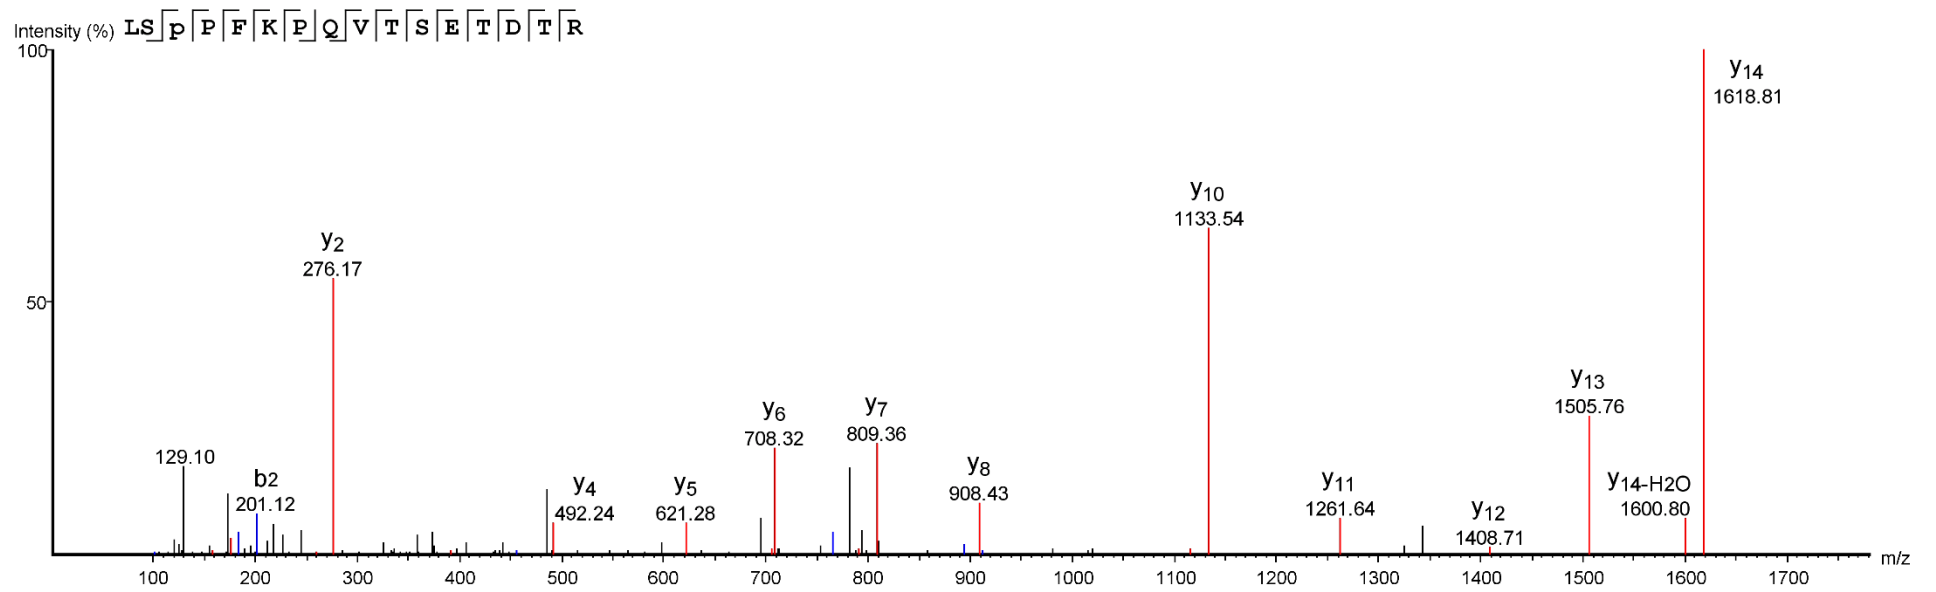

Pep17

Scan #6901

A-153: AKT1<sub>(421-436)</sub>: LSPPFK**P**QVTSETDTR+

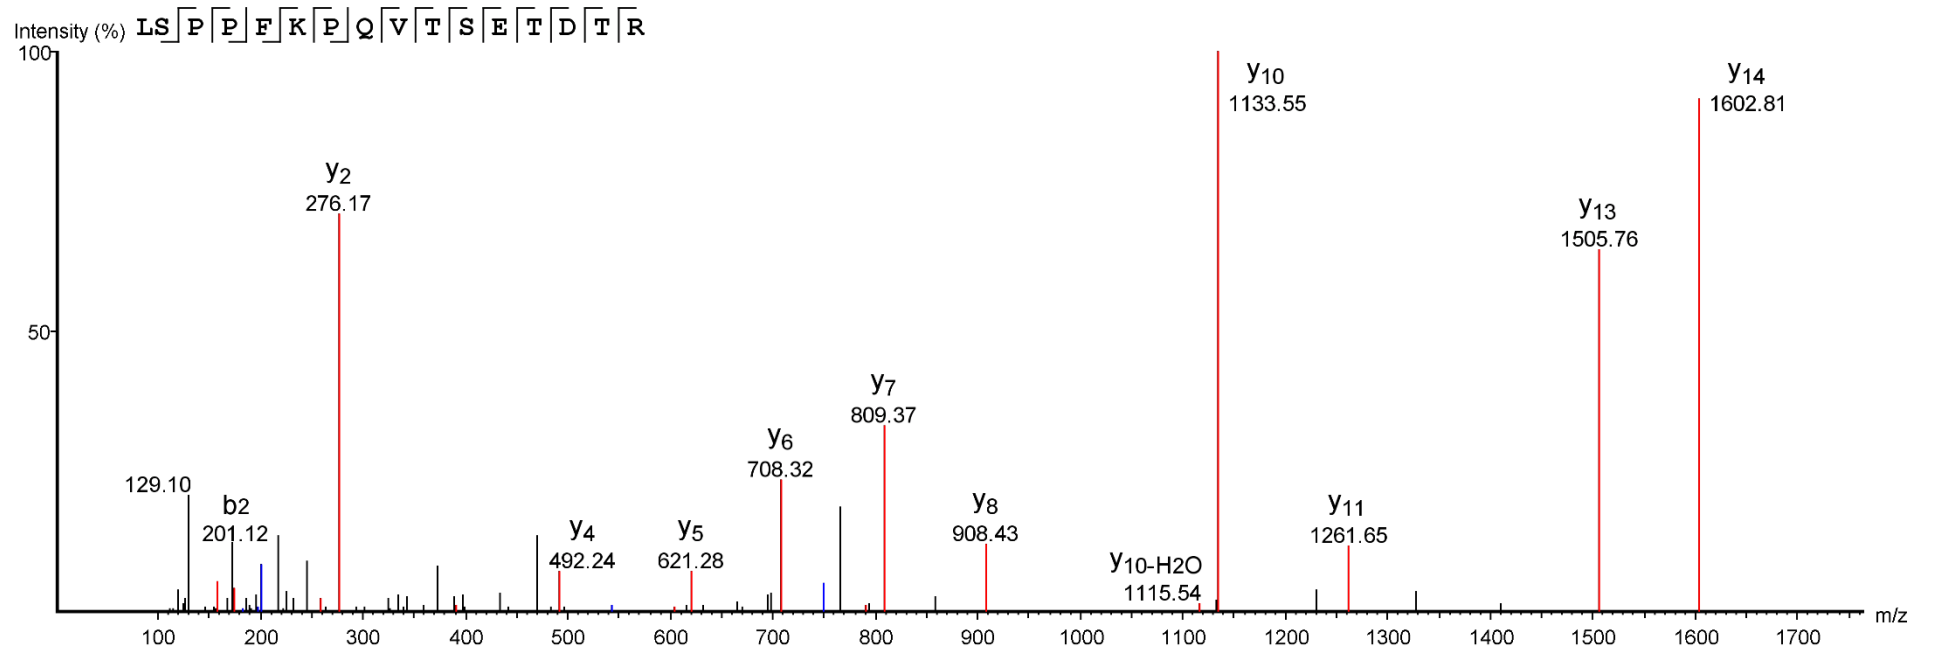

YMT83

Scan #10489

A-154: AKT1<sub>(421-436)</sub>: LSPPFK**P**QVTSETDTR+

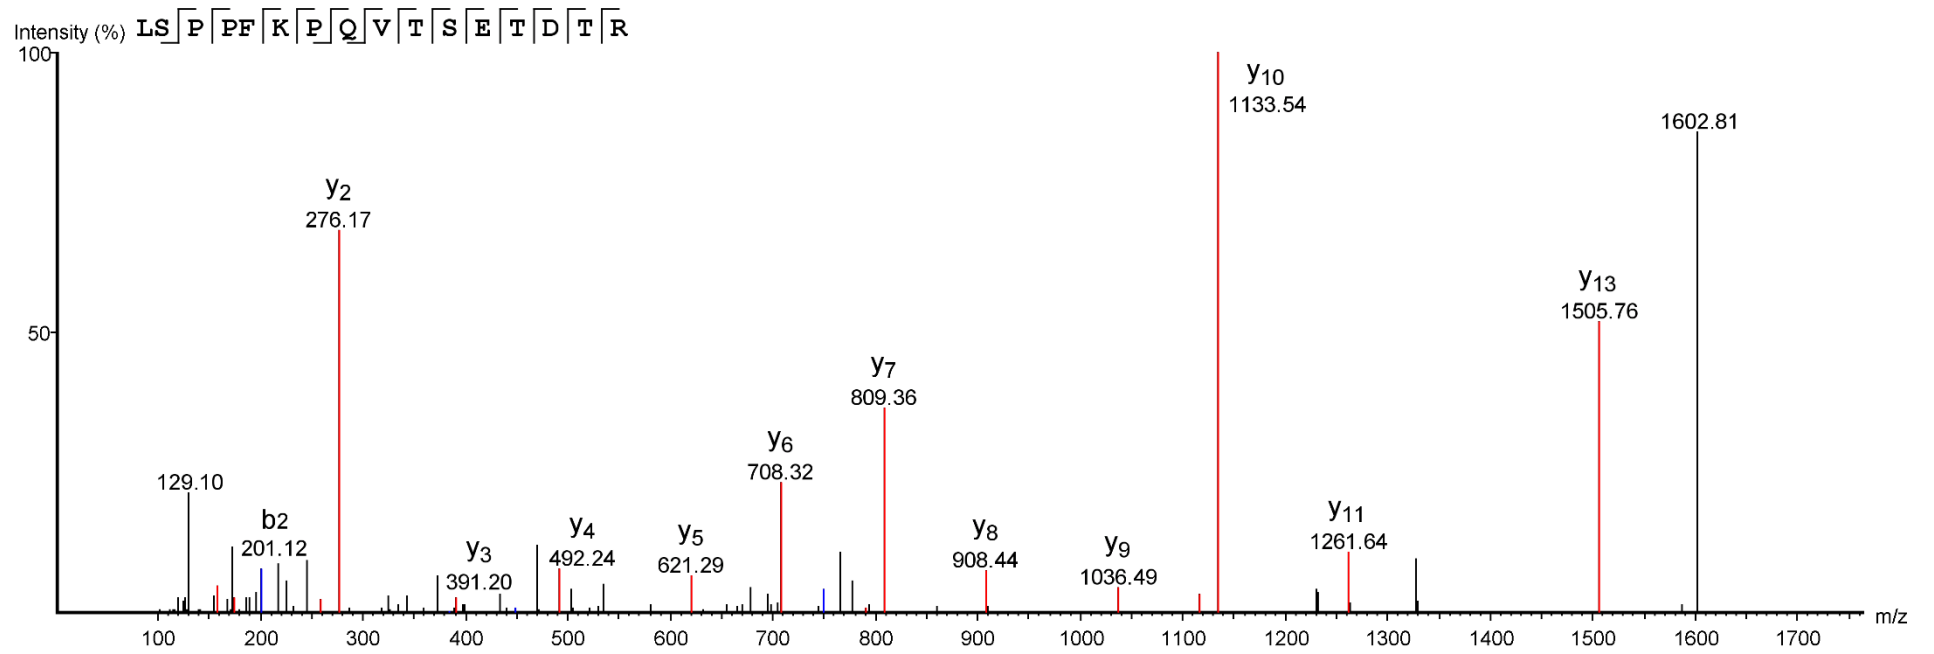

YMT84

Scan #10449



A-155: ATF4<sub>(142-168)</sub>: **GHLPE**SLTKPDQVA**PFTFLQPLPLSPG**+

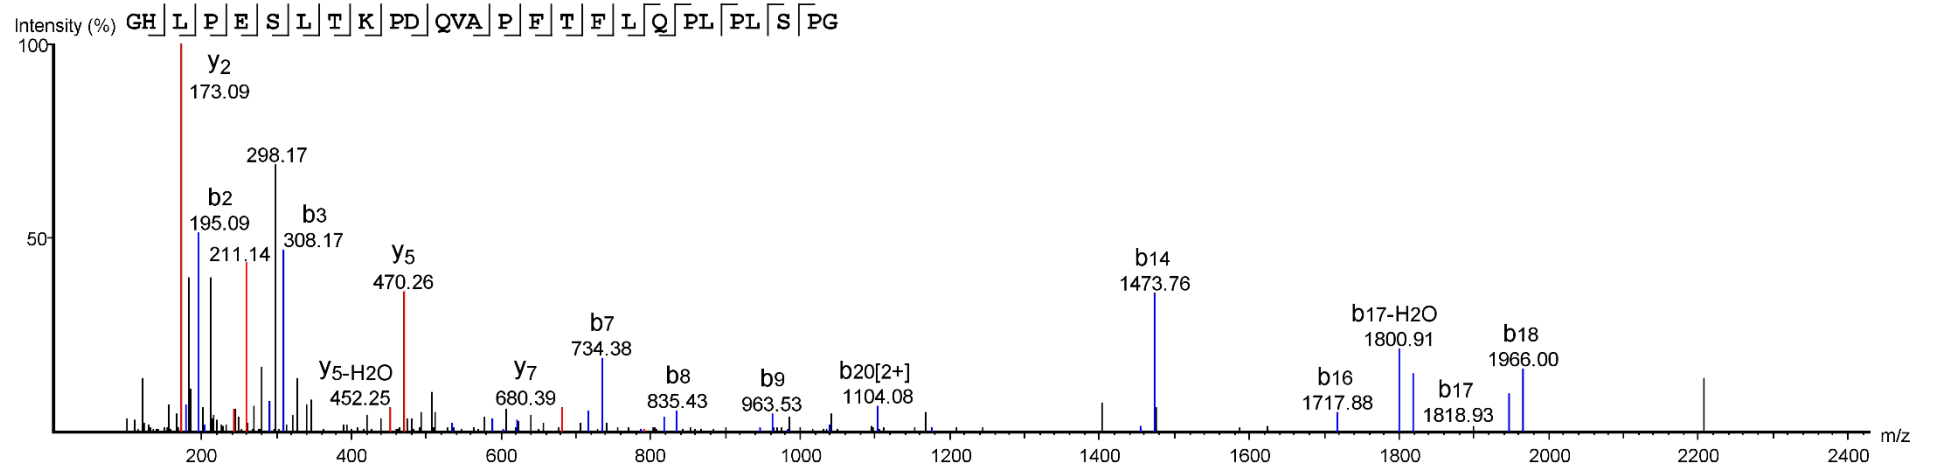

YMT45

Scan

#24007

A-156: ATF4<sub>(142-168)</sub>: GHLPESLTKPDQVAPFTFLQPLPLSPG+

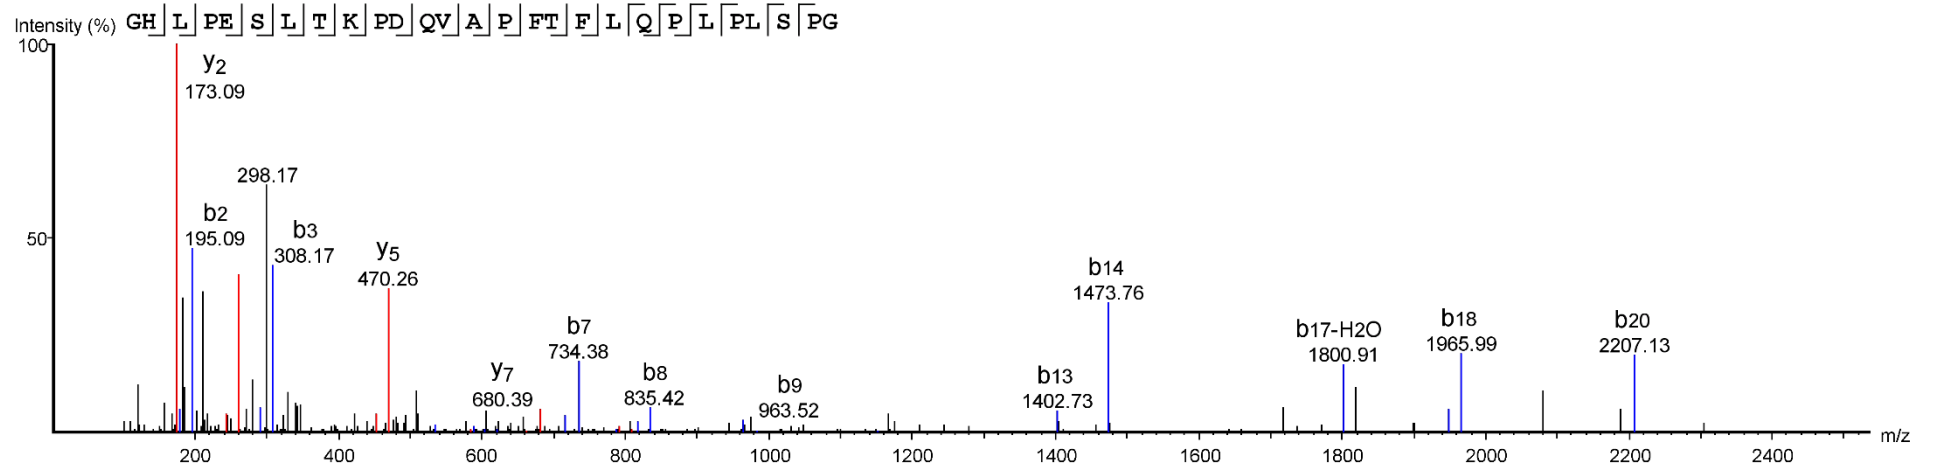

YMT46

Scan

#24252

A-157: ATF4<sub>(172-198)</sub>: STPDHFSFSLELGSEVDITEGDRKPDYIT

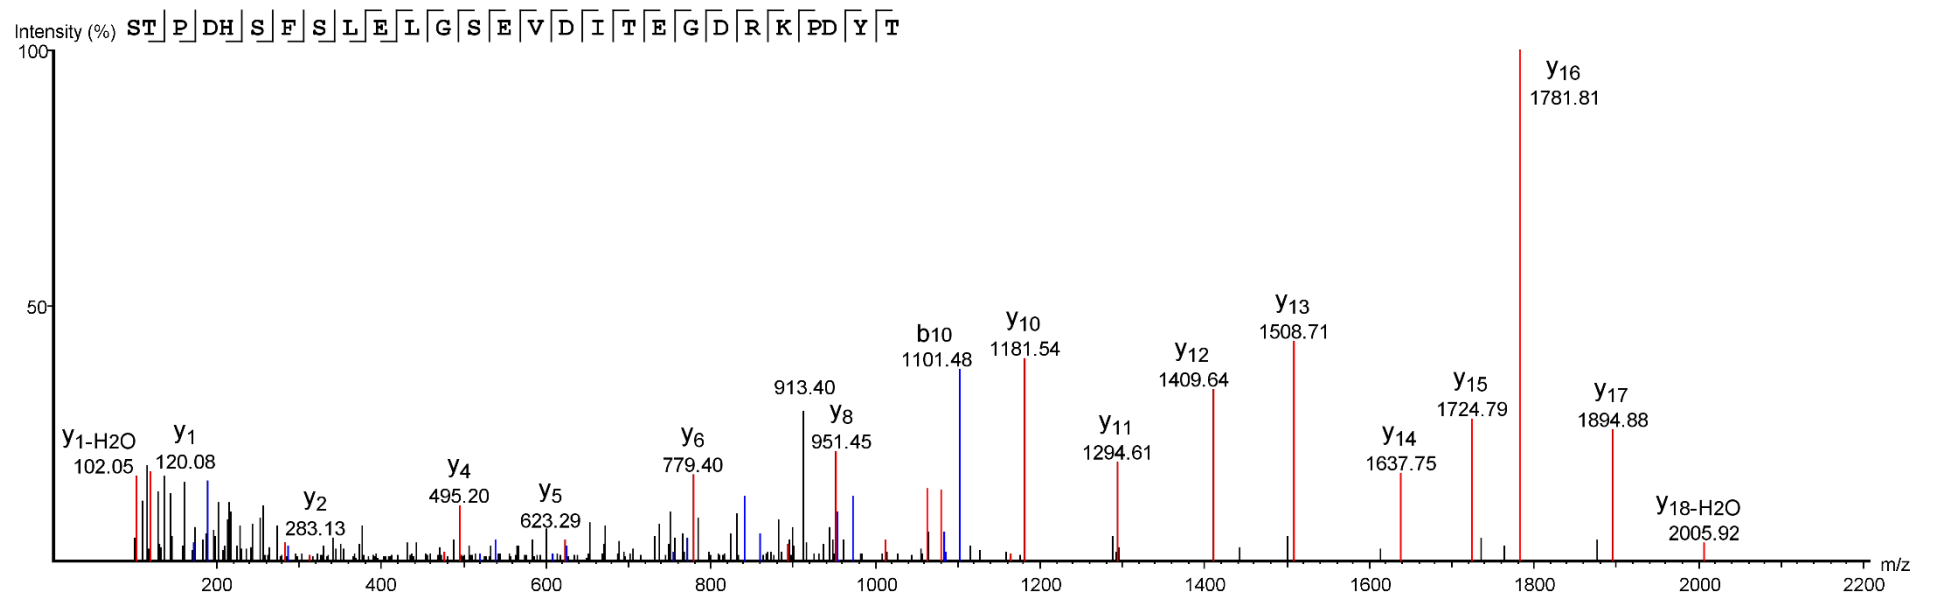

YMT45  
Scan  
#17806

A-158: ATF4<sub>(172-198)</sub>: STPDHFSLELGSEVDITEGD[R]KPDY T

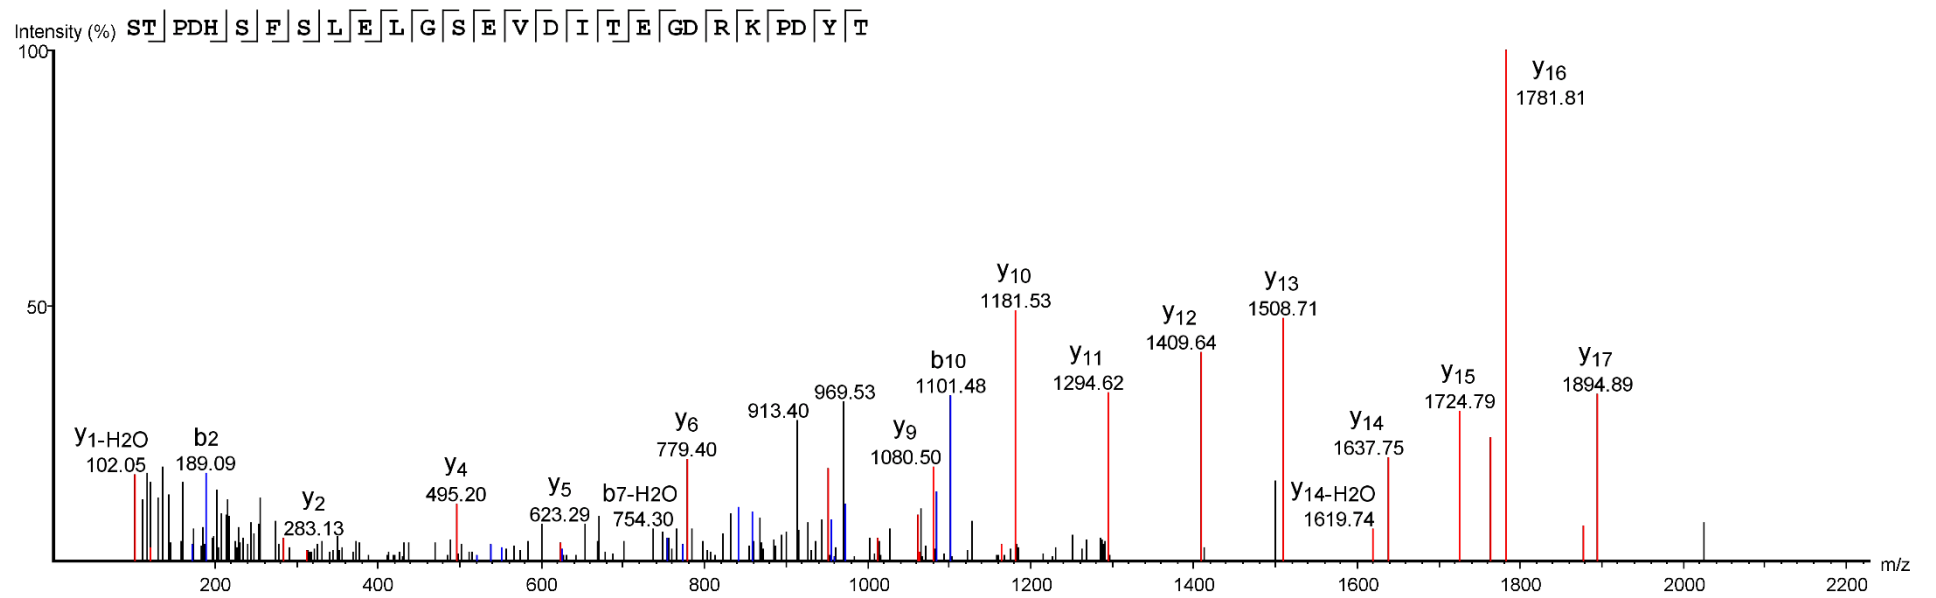

YMT46

Scan #

A-159: CENPN<sub>(308-329)</sub>: SLAPAGIADAPLSPLLTCLIPNKR

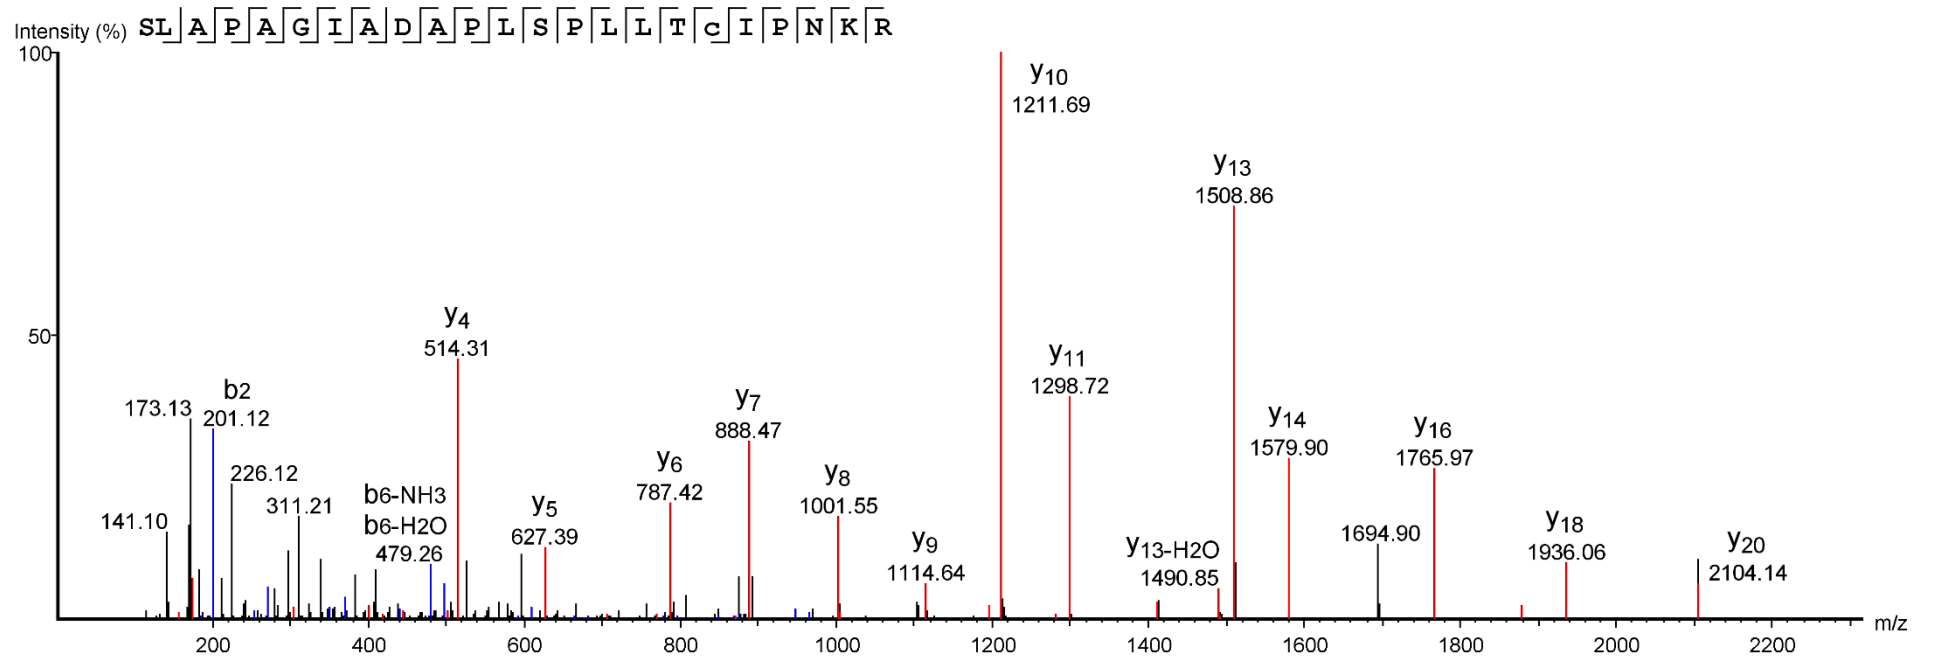

Pep14

Scan #15395

A-160: CENPN<sub>(308-329)</sub>: SLAP(+15.99)AGIADAPLSPLLTC(+57.02)IPNKR

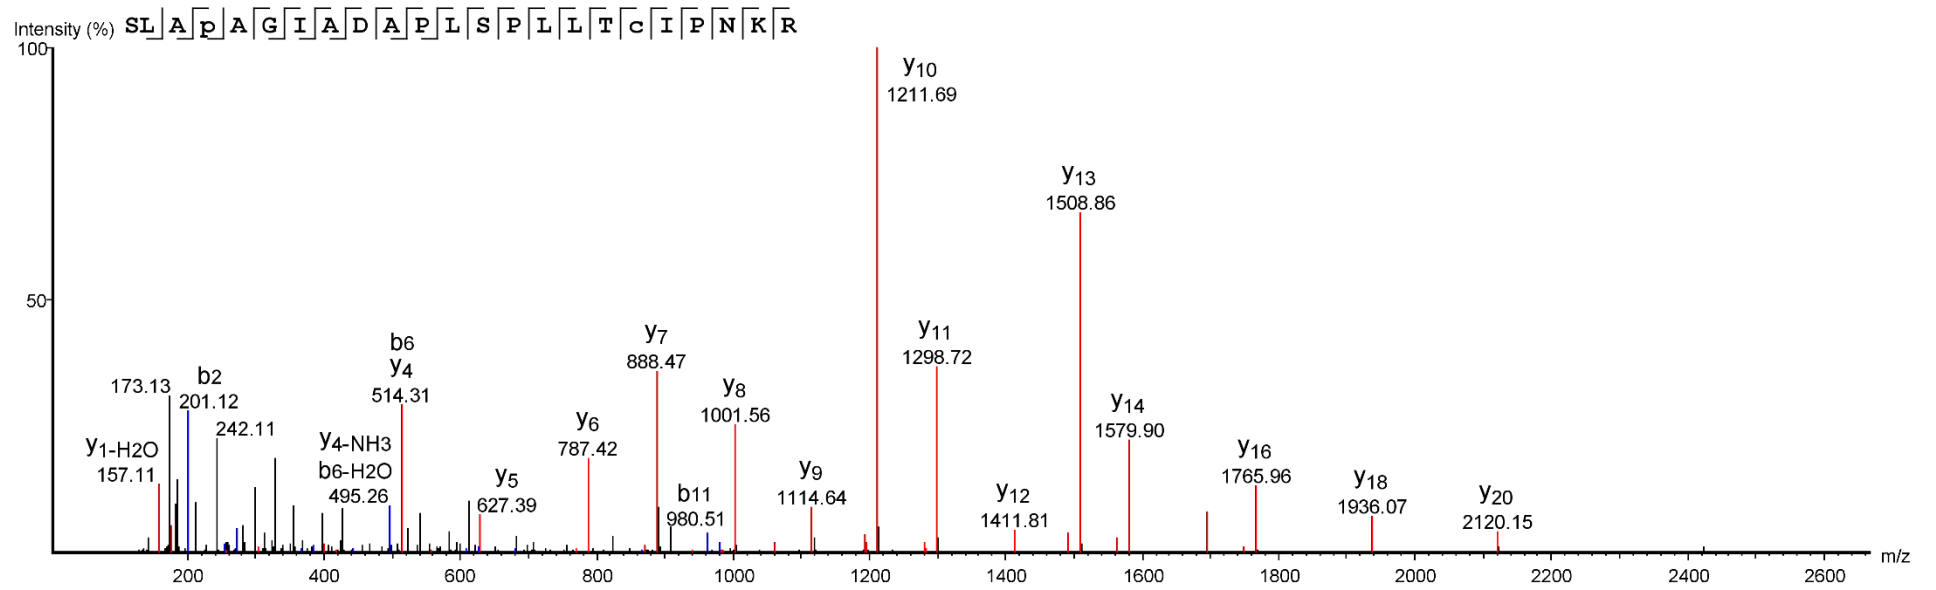

Pep14

Scan #14581

A-161: CENPN<sub>(308-329)</sub>: SLAPAGIADAPLSPLLTC(+57.02)IPNKR

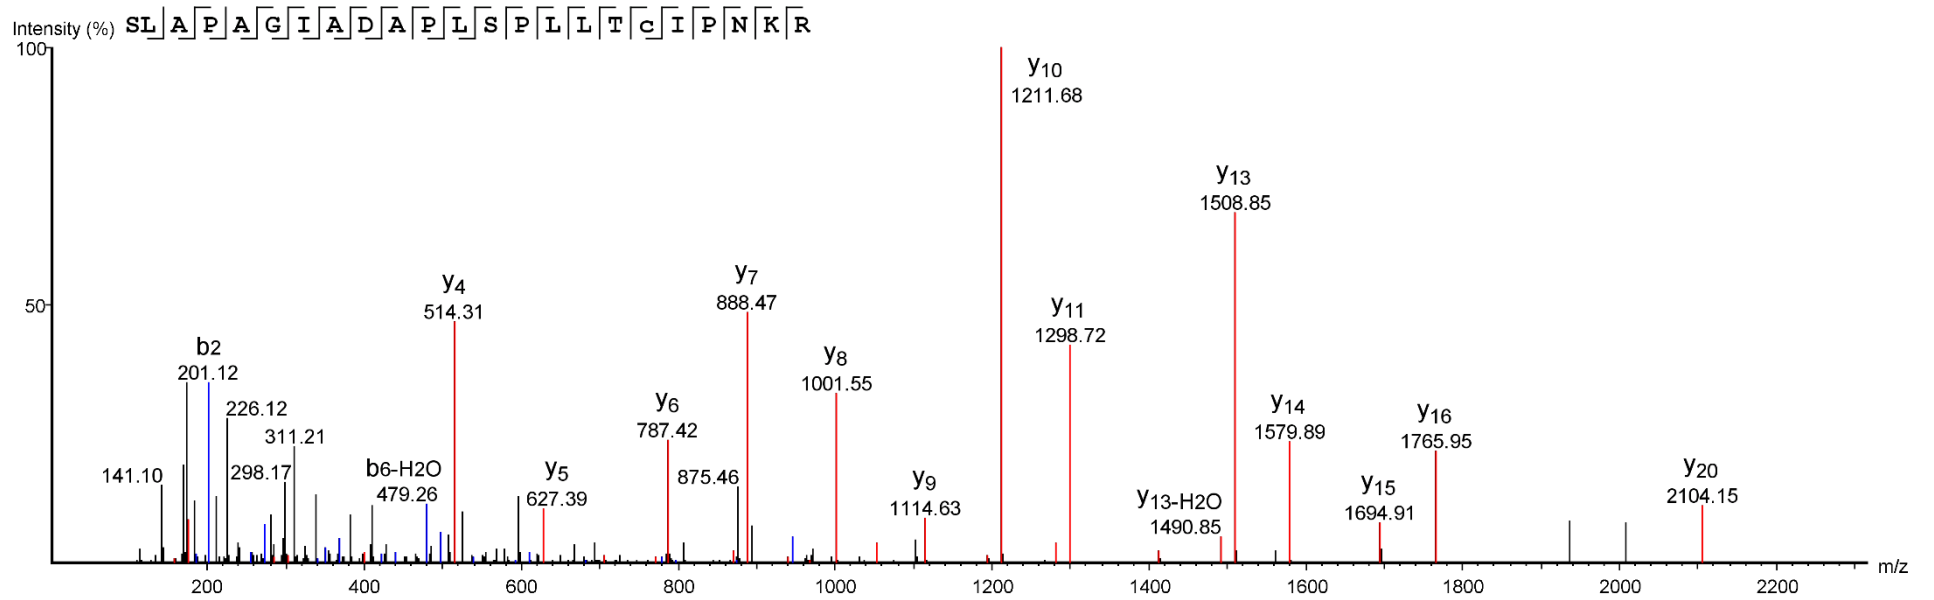

YMT39

Scan #20298

A-162: CENPN<sub>(308-329)</sub>: SLAPAGIADAPLSPLLTC(+57.02)IPNKR

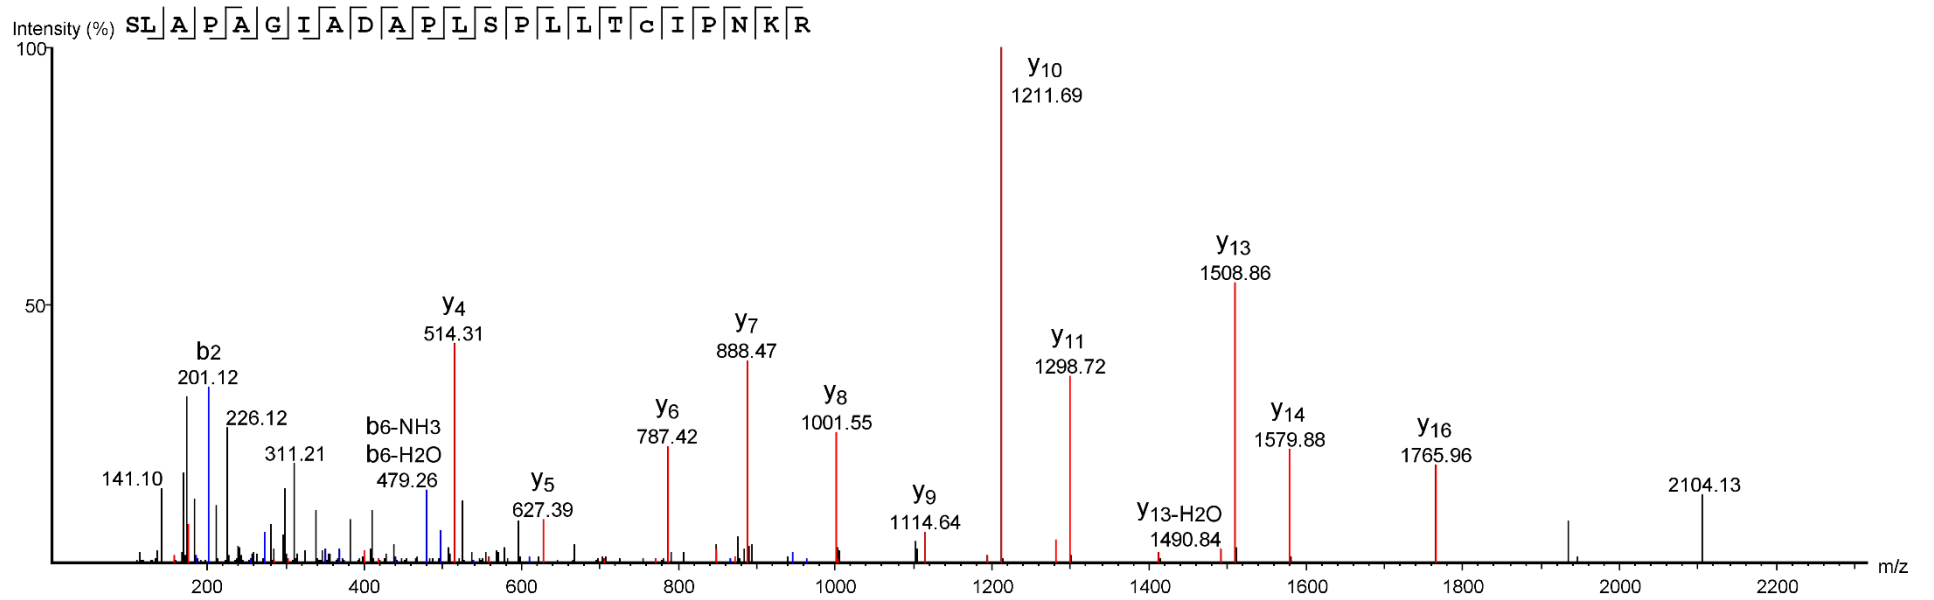

YMT40

Scan #19546



A-163: CEP192<sub>(1710-1721)</sub>: WHLSSLAPPYVK

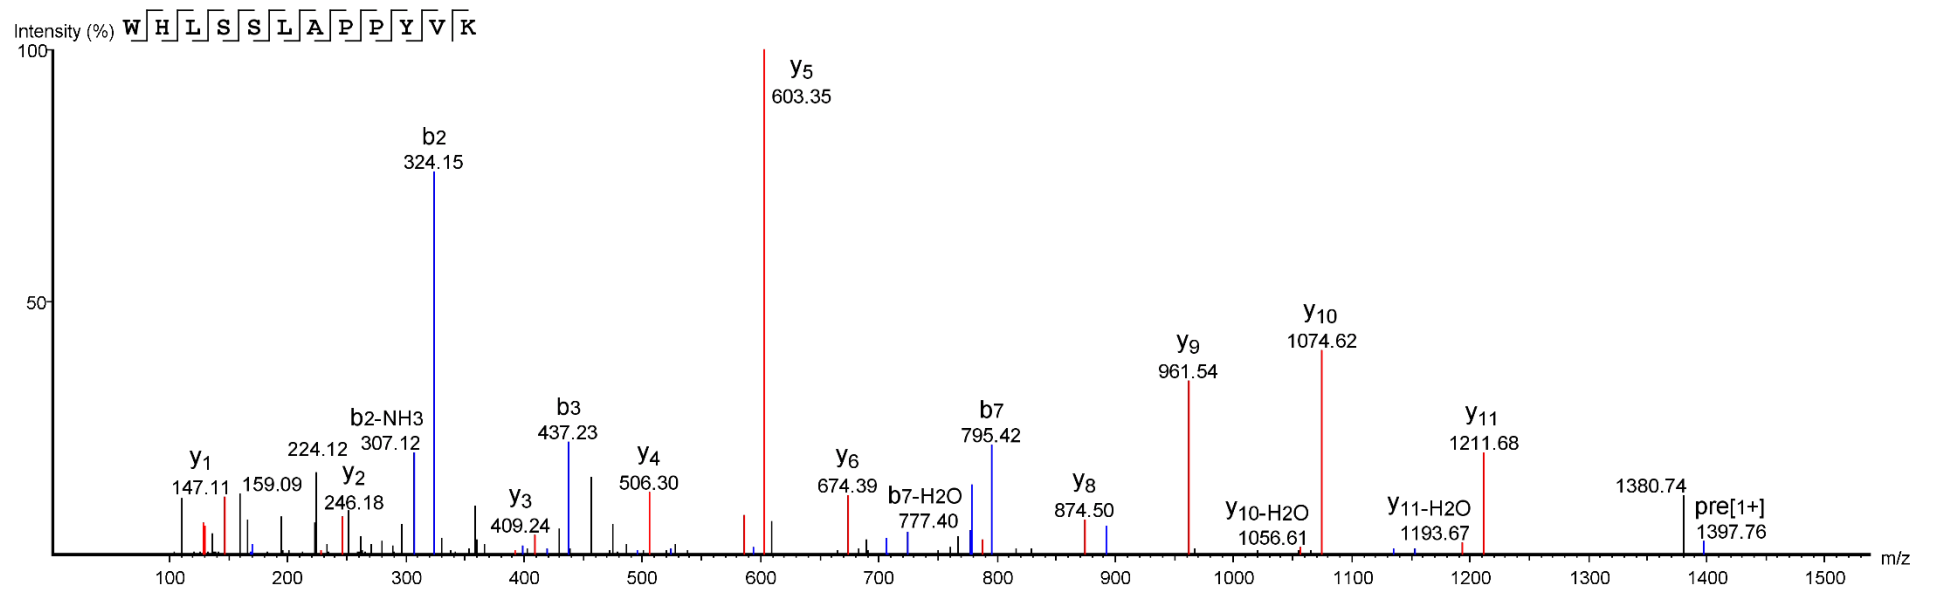

Pep11

Scan #13349

A-164: CEP192<sub>(1710-1721)</sub>: WHLSSLAP(+15.99)PYVK

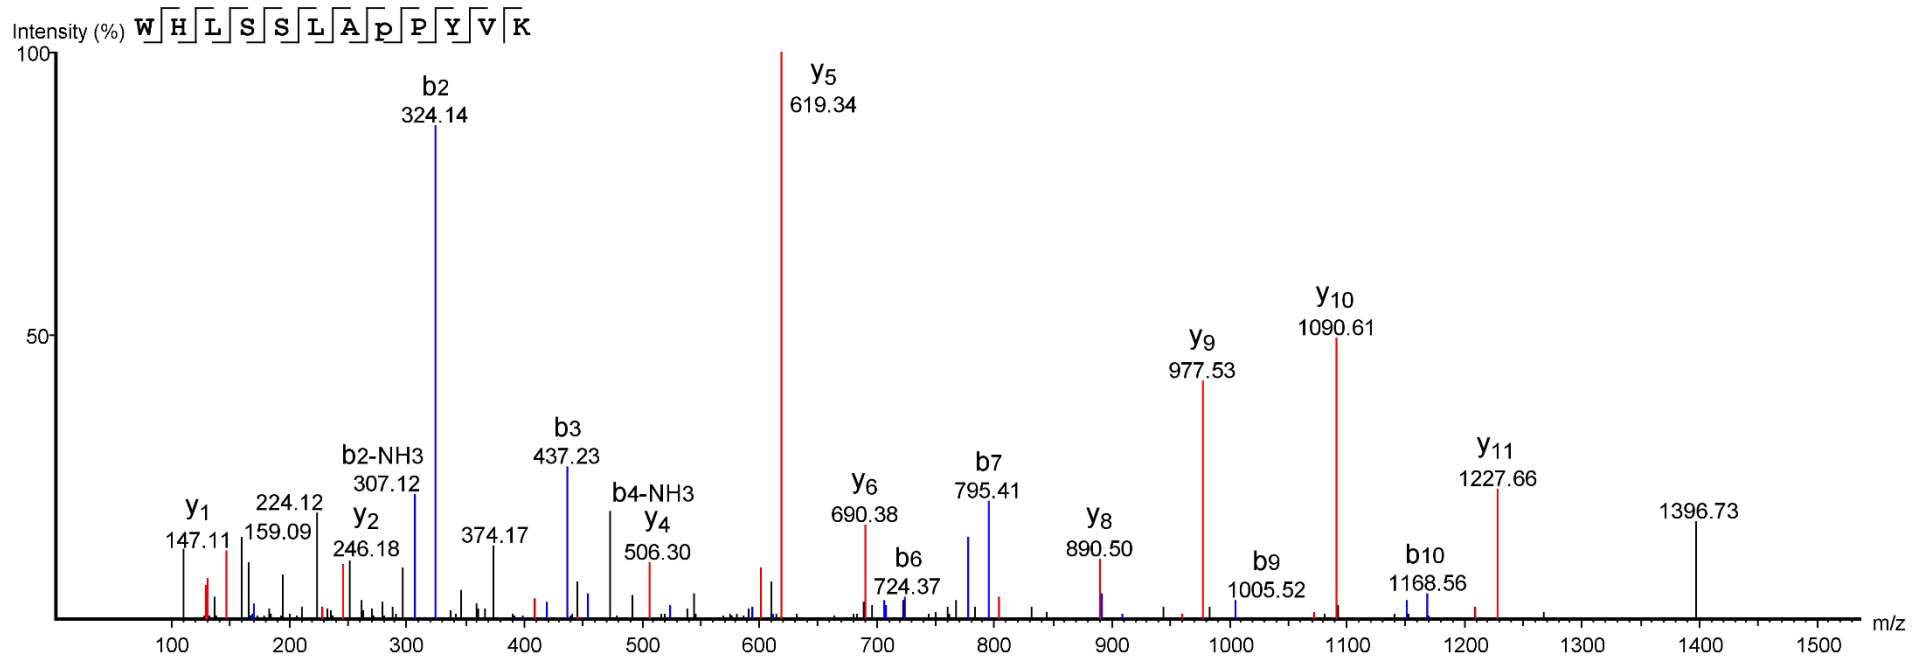

Pep11

Scan #11317

A-165: CEP192<sub>(1710-1721)</sub>: WHLSSLAPPYVK

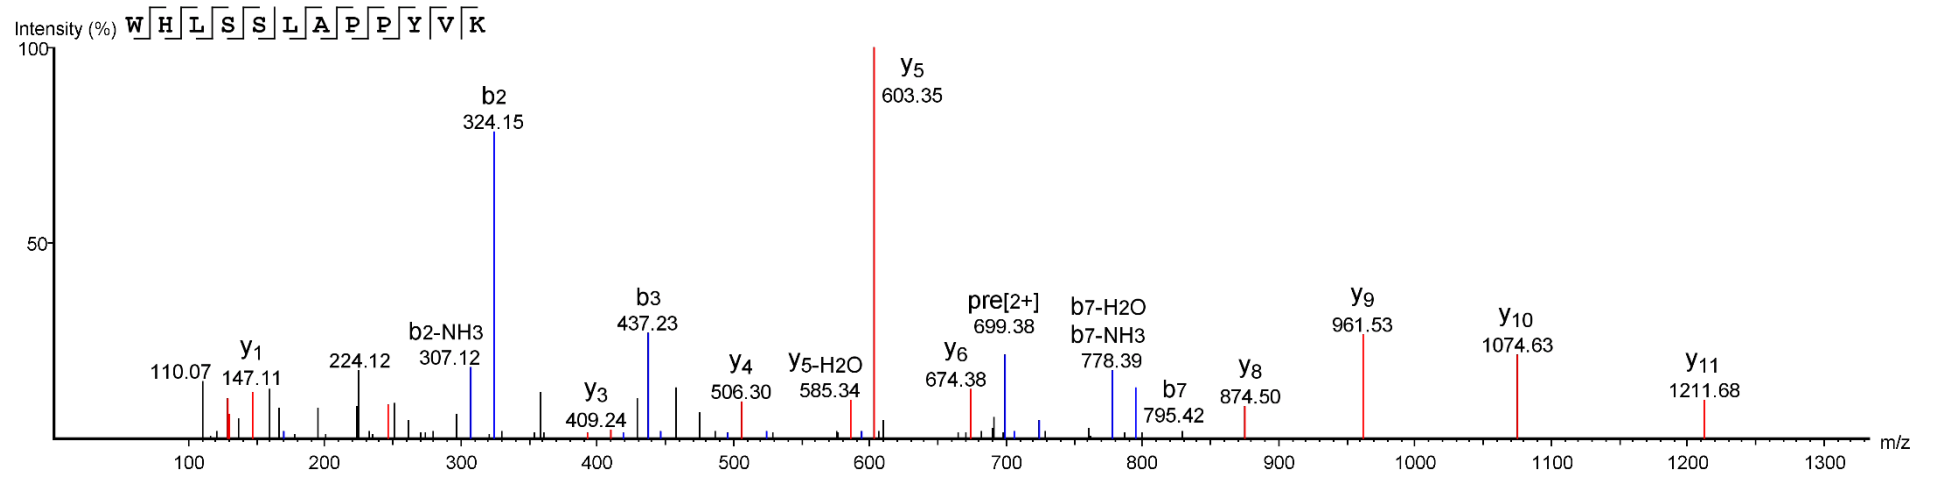

YMT61

Scan #12668

A-166: CEP192<sub>(1710-1721)</sub>: WHLSSLAPPYVK

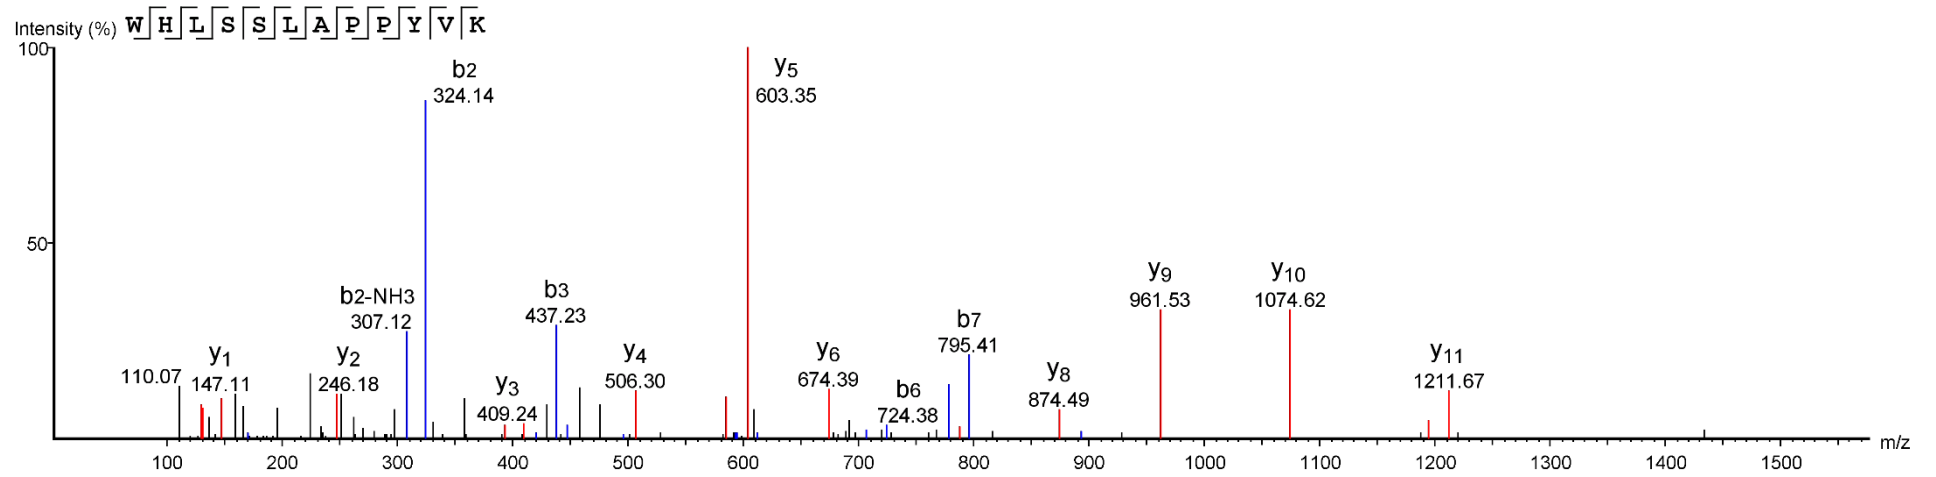

YMT62

Scan #12324

A-167:  $\text{EEF2K}_{(94-111)}$ : HMPDPWAEFHLEDIATER

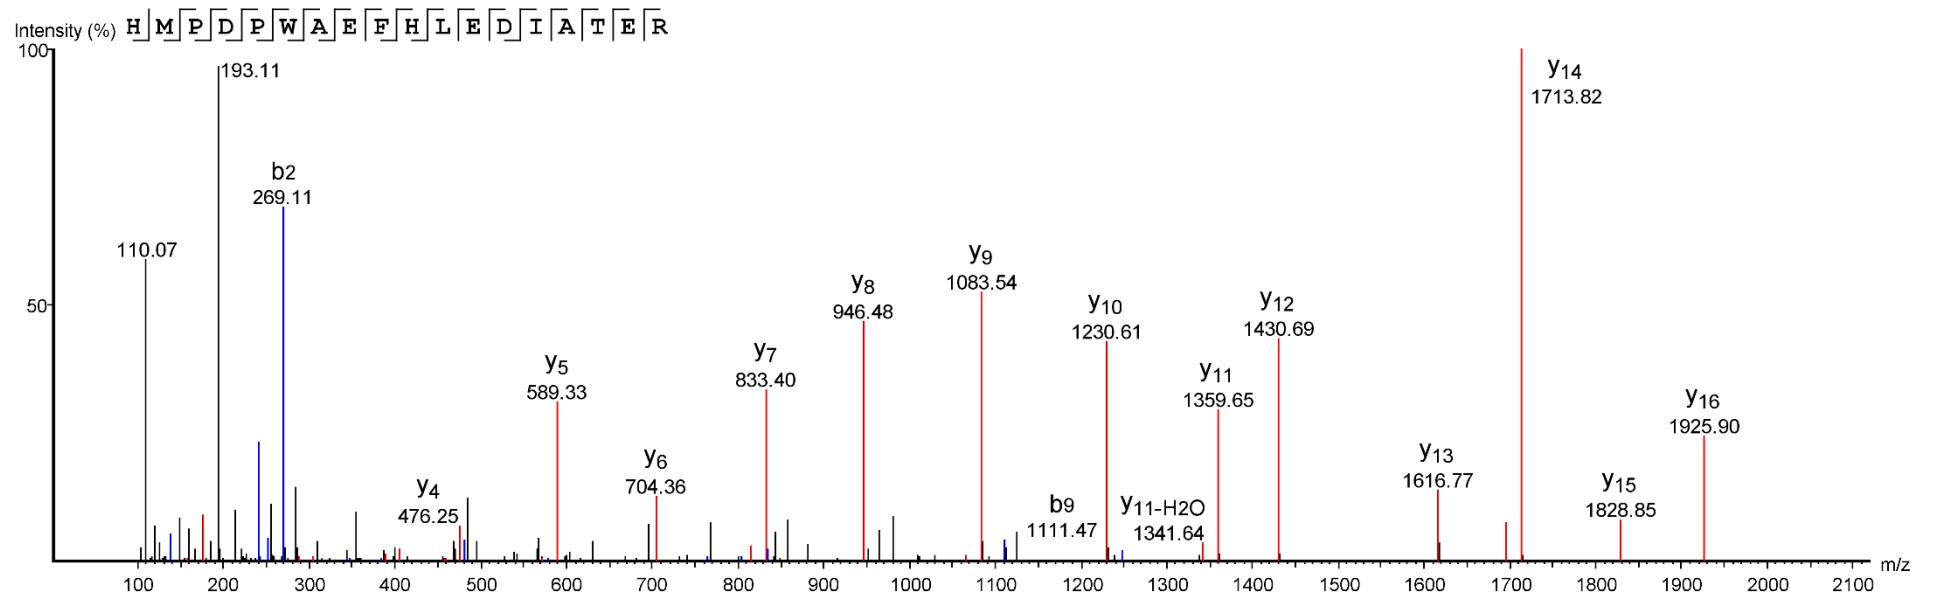

Pep17  
Scan  
#15551

A-168: EEF2K<sub>(94-111)</sub>: HM(+15.99)PDPWAEFHLEDIATER

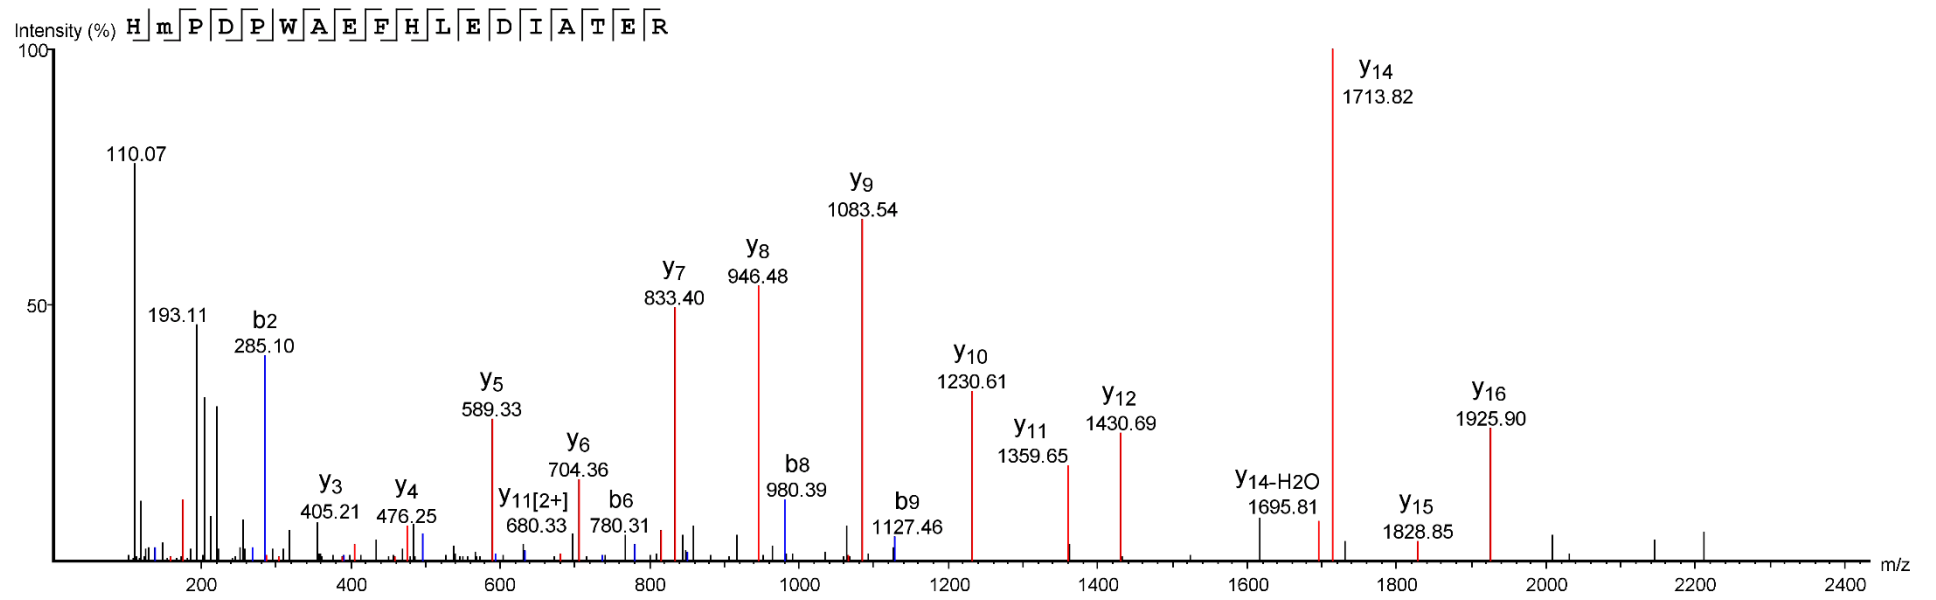

Pep17  
Scan  
#14303

A-169: EEF2K<sub>(94-111)</sub>: HMPDP(+15.99)WAEFHLEDIATER

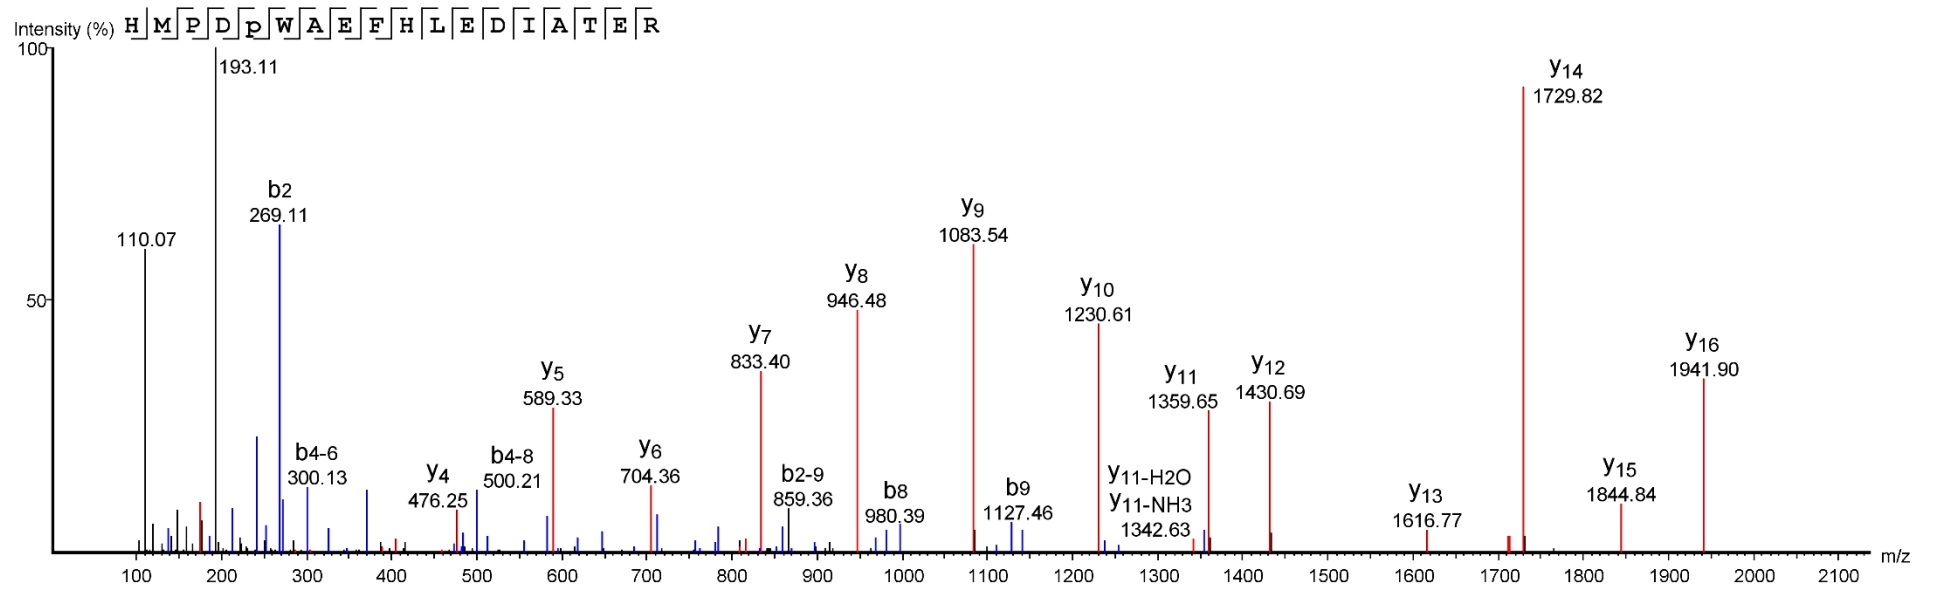

Pep17  
Scan  
#14096

A-170: EEF2K<sub>(94-111)</sub>: HM(+15.99)PDP(+15.99)WAEFHLEDIATER

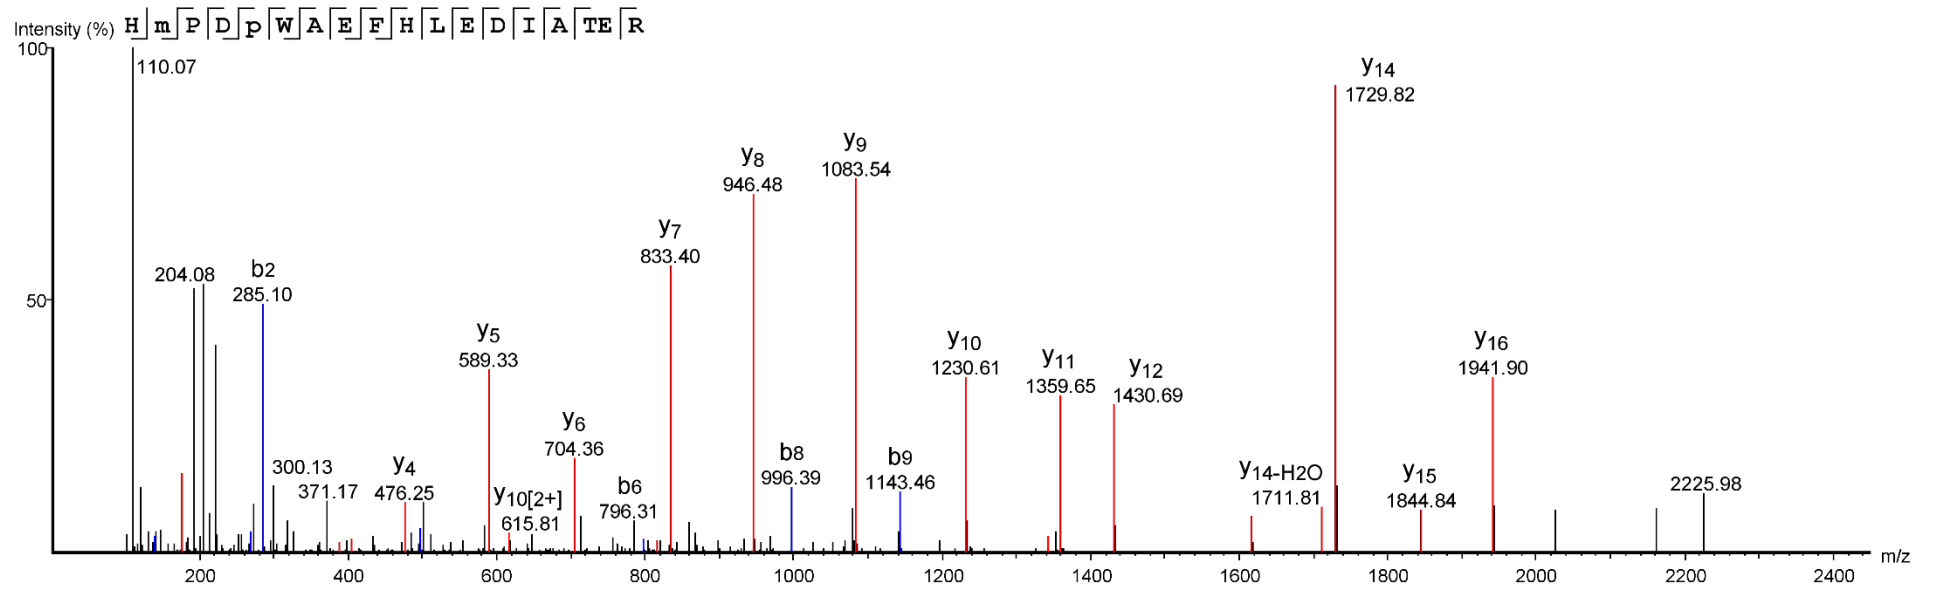

Pep17  
Scan  
#13291



A-171:  $\text{EEF2K}_{(94-111)}$ : HMPDPWAEFHLEDIATER

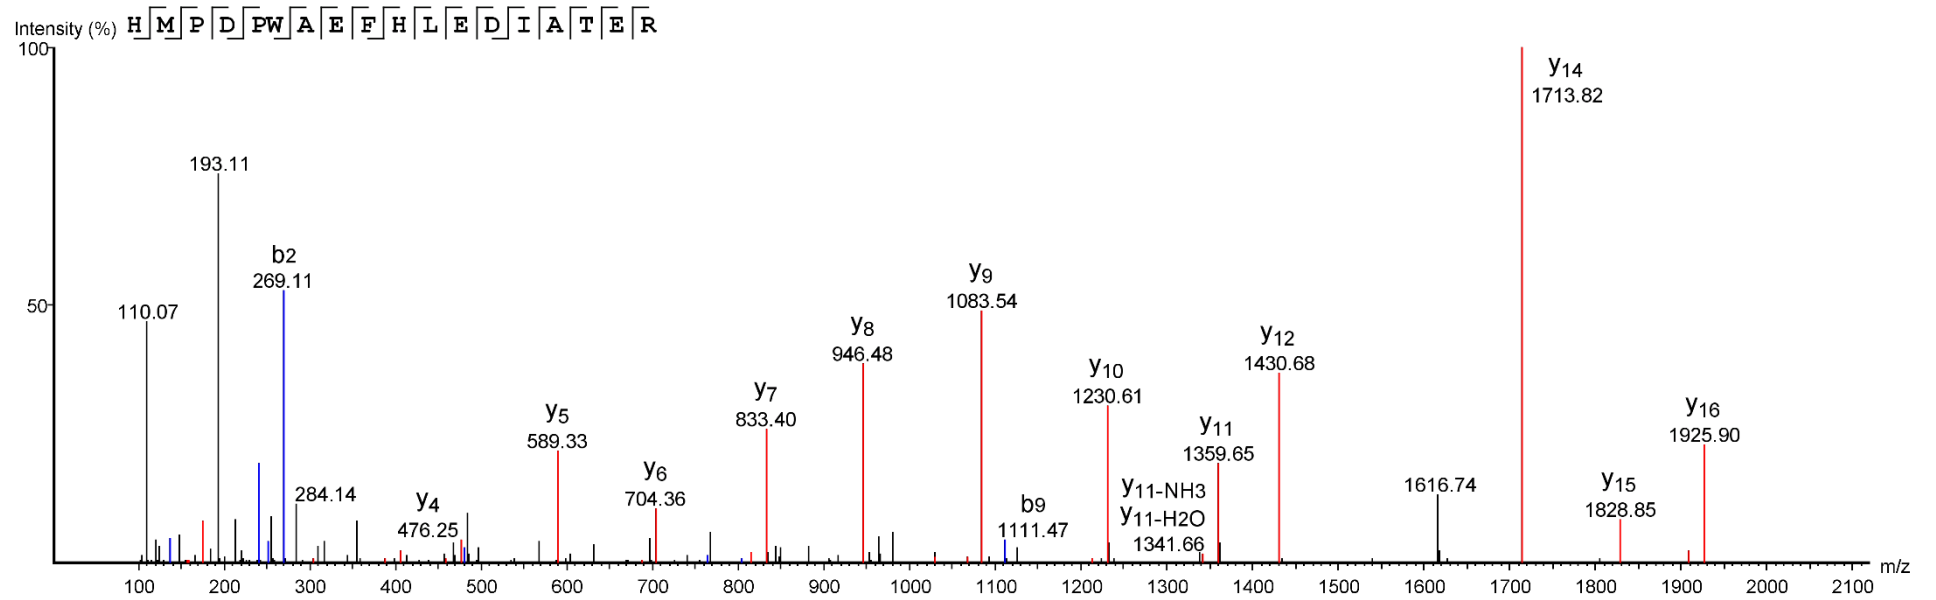

YMT69  
Scan  
#17085

A-172:  $\text{EEF2K}_{(94-111)}$ : HMPDPWAEFHLEDIATER

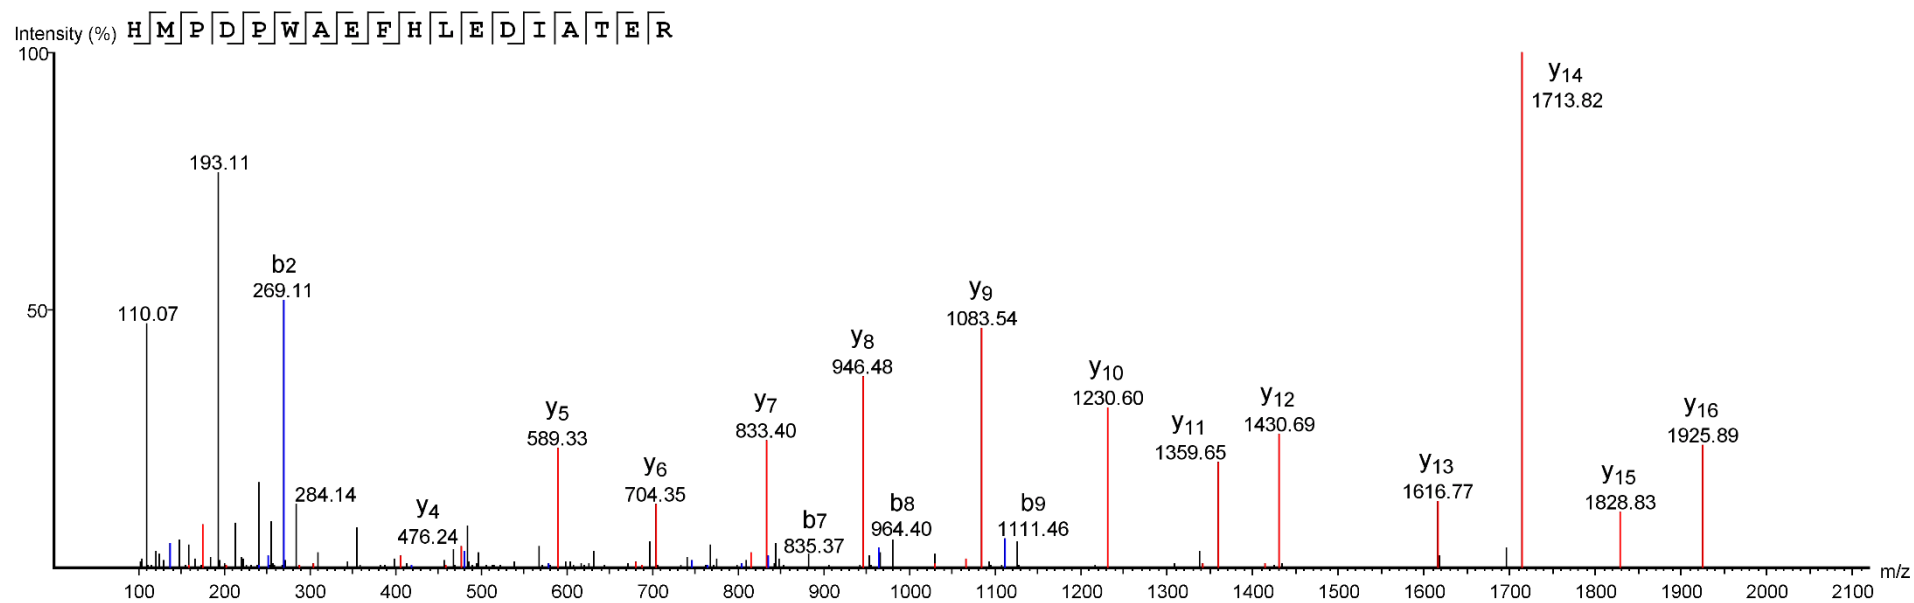

YMT70

Scan

#17382

A-173: EEF2K<sub>(94-111)</sub>: HM(+15.99)PDPWAEFHLEDIATER

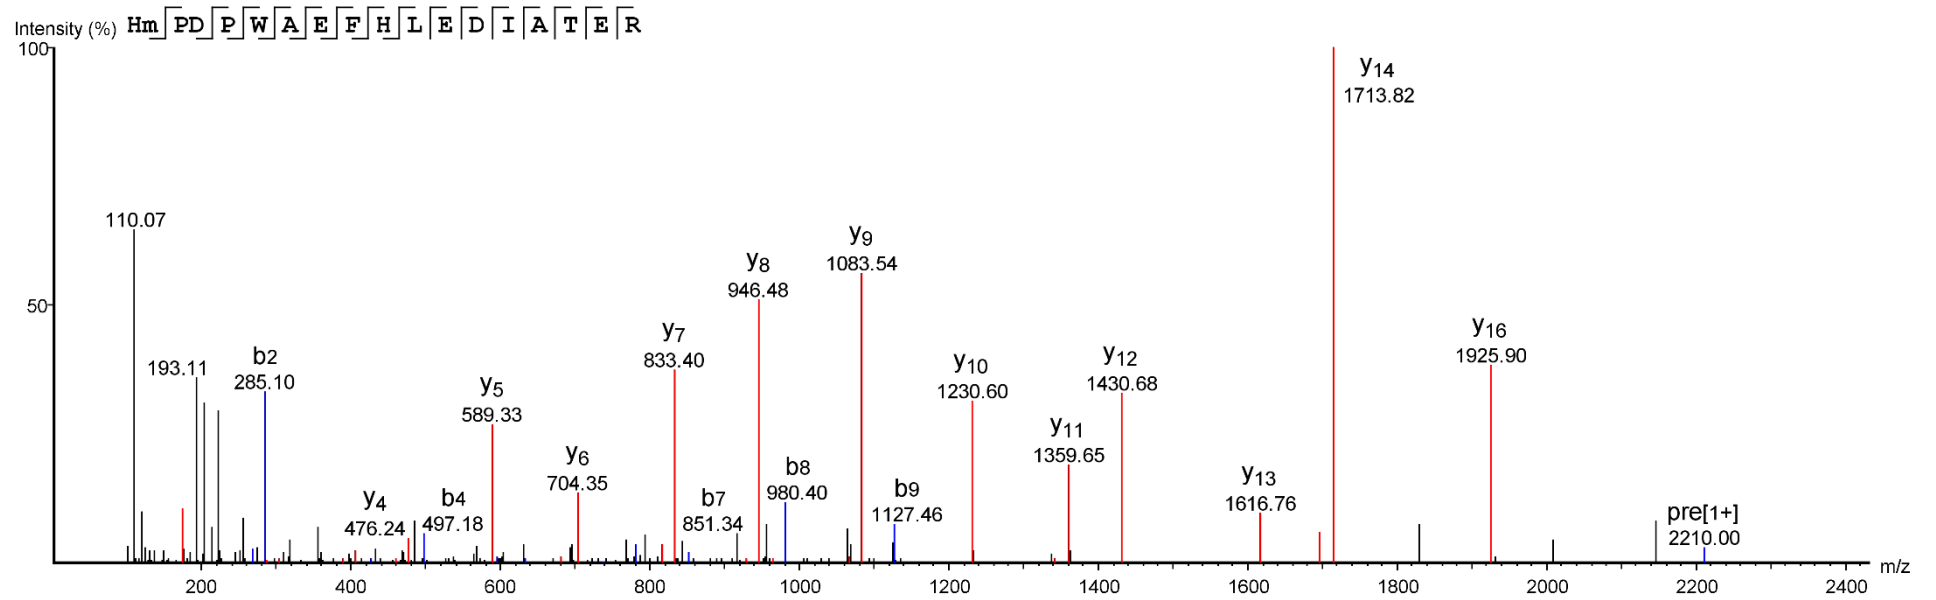

YMT69  
Scan  
#15852

A-174: EEF2K<sub>(94-111)</sub>: HM(+15.99)PDPWAEFHLEDIATER

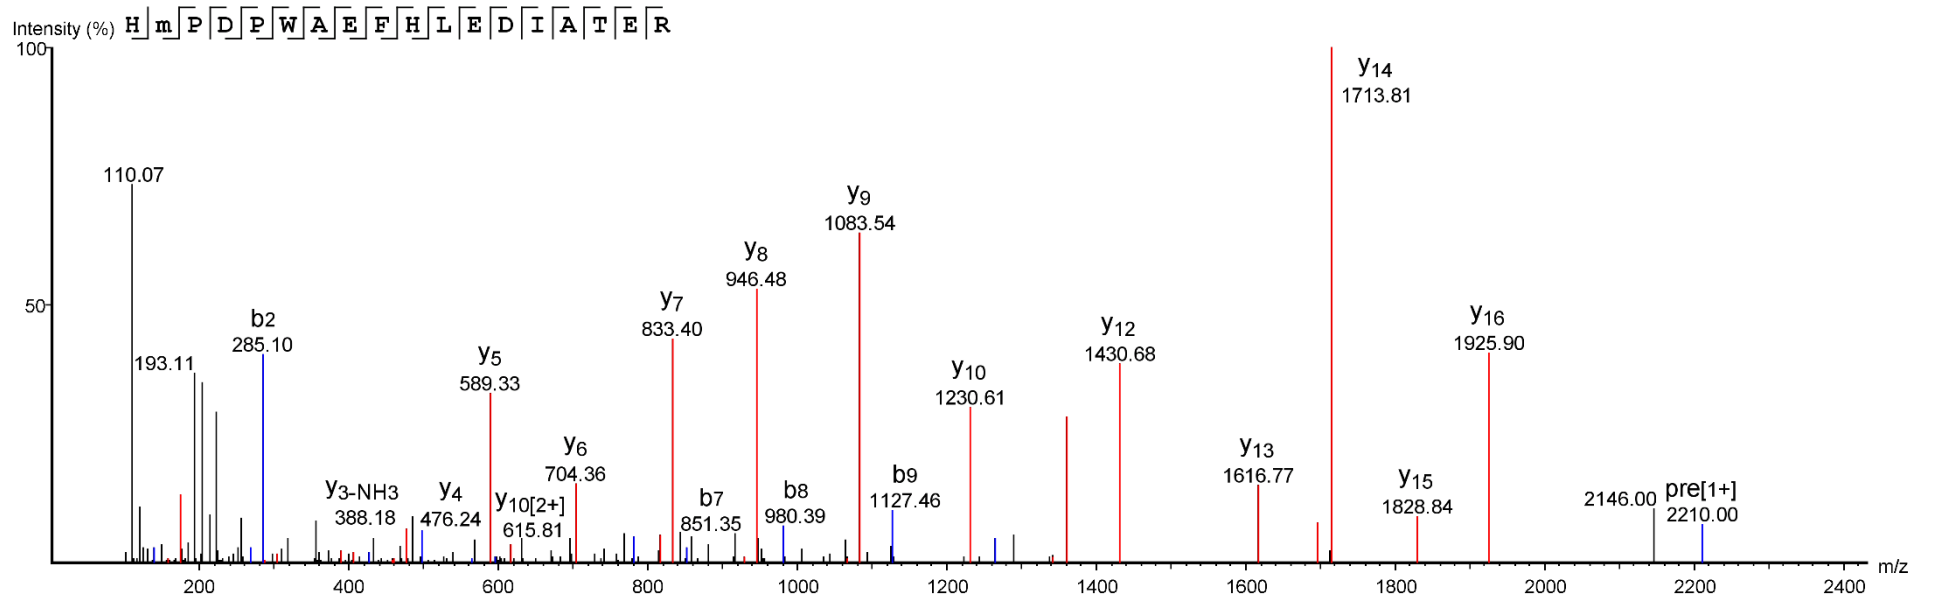

YMT70  
Scan  
#15909

A-175: EPOR<sub>(426-453)</sub>: YTILDPSSQLLRPWTLc(+57.02)PELPPTPHLK

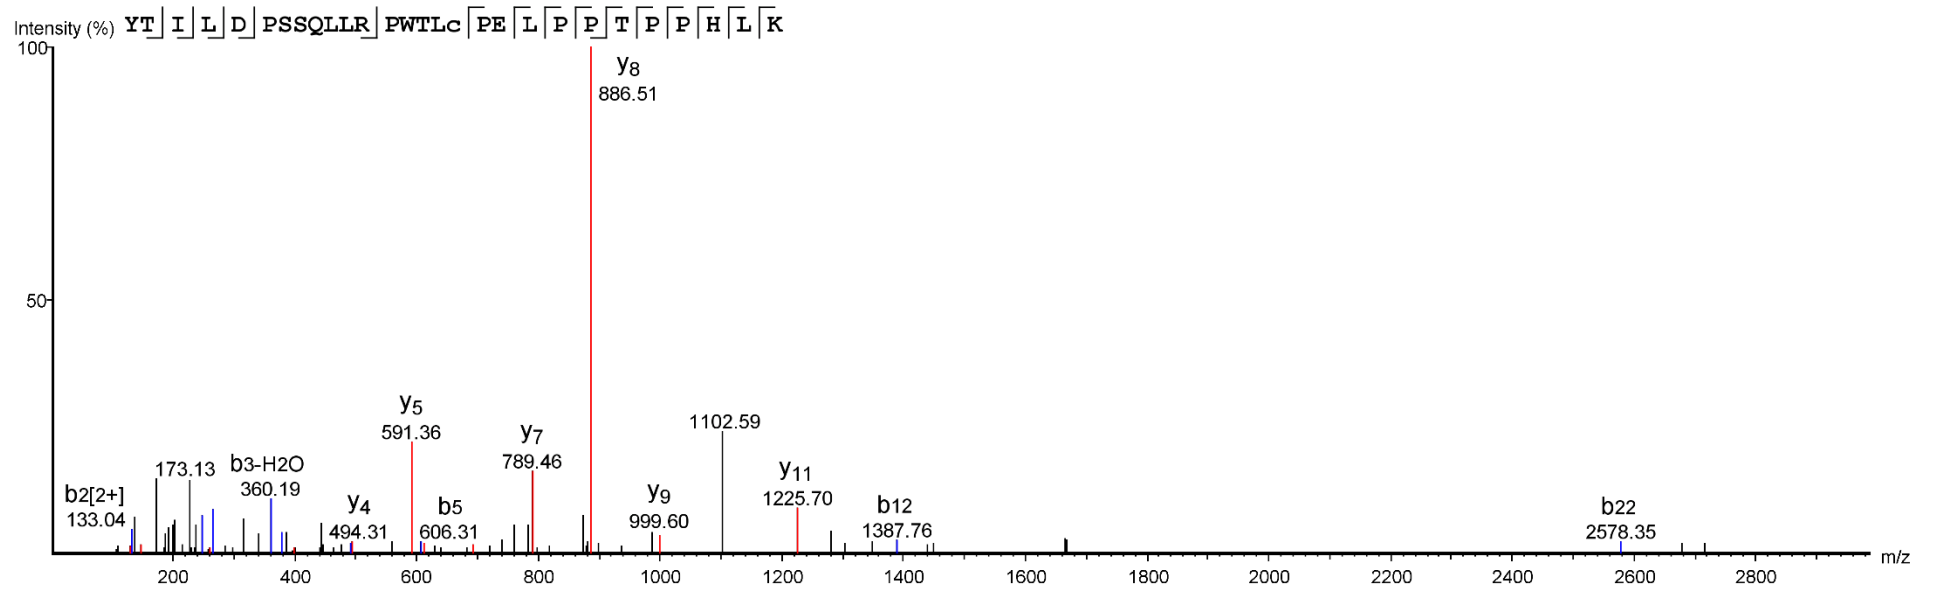

Pep14

Scan #18555

A-176: EPOR<sub>(426-453)</sub>: YTILDPSSQLLRPWTLC(+57.02)P(+15.99)ELPPTPHLK

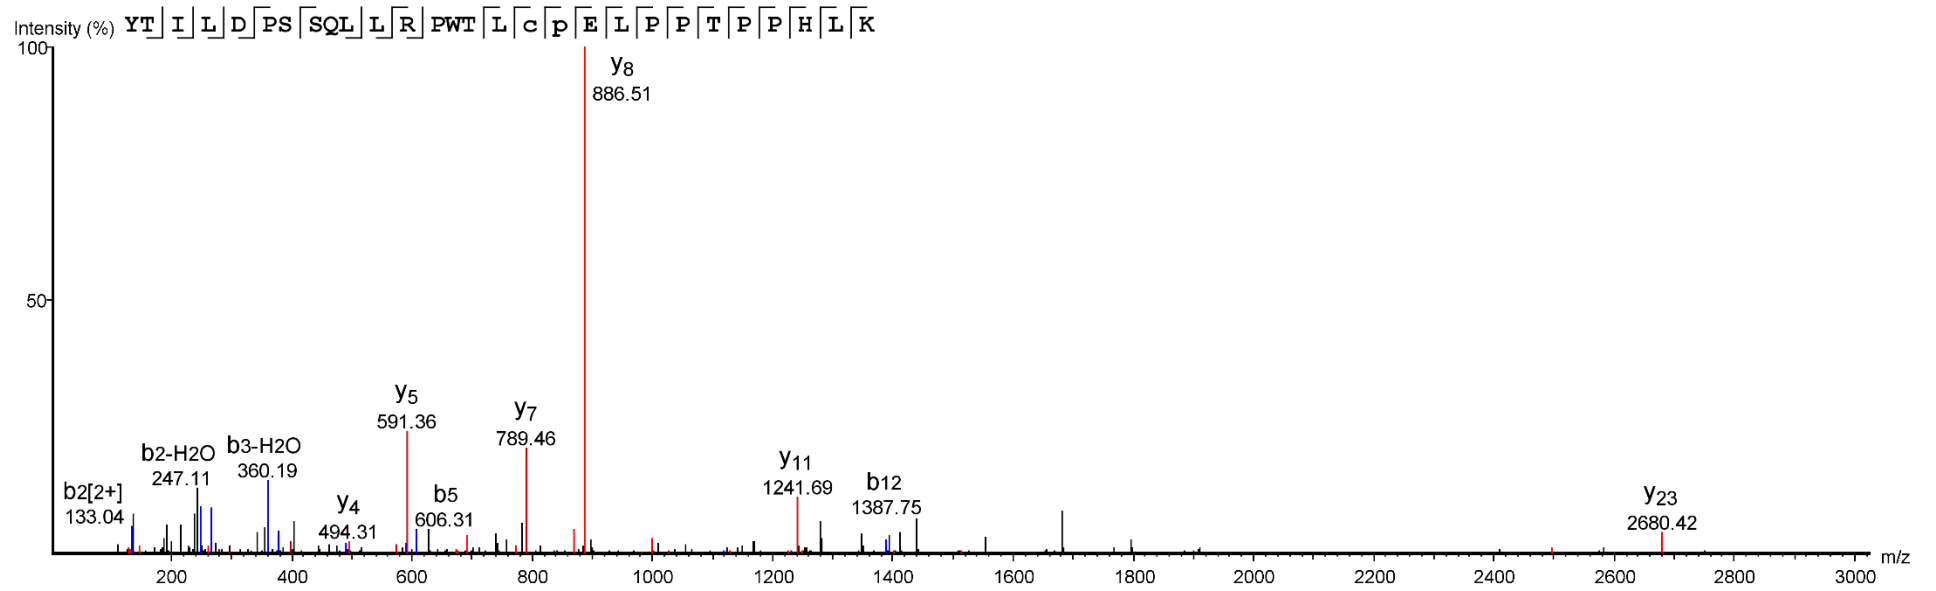

Pep14

Scan #17203

A-177: EPOR<sub>(426-453)</sub>: YTILDPSSQLLRPWTLcPELPPTPpHLK

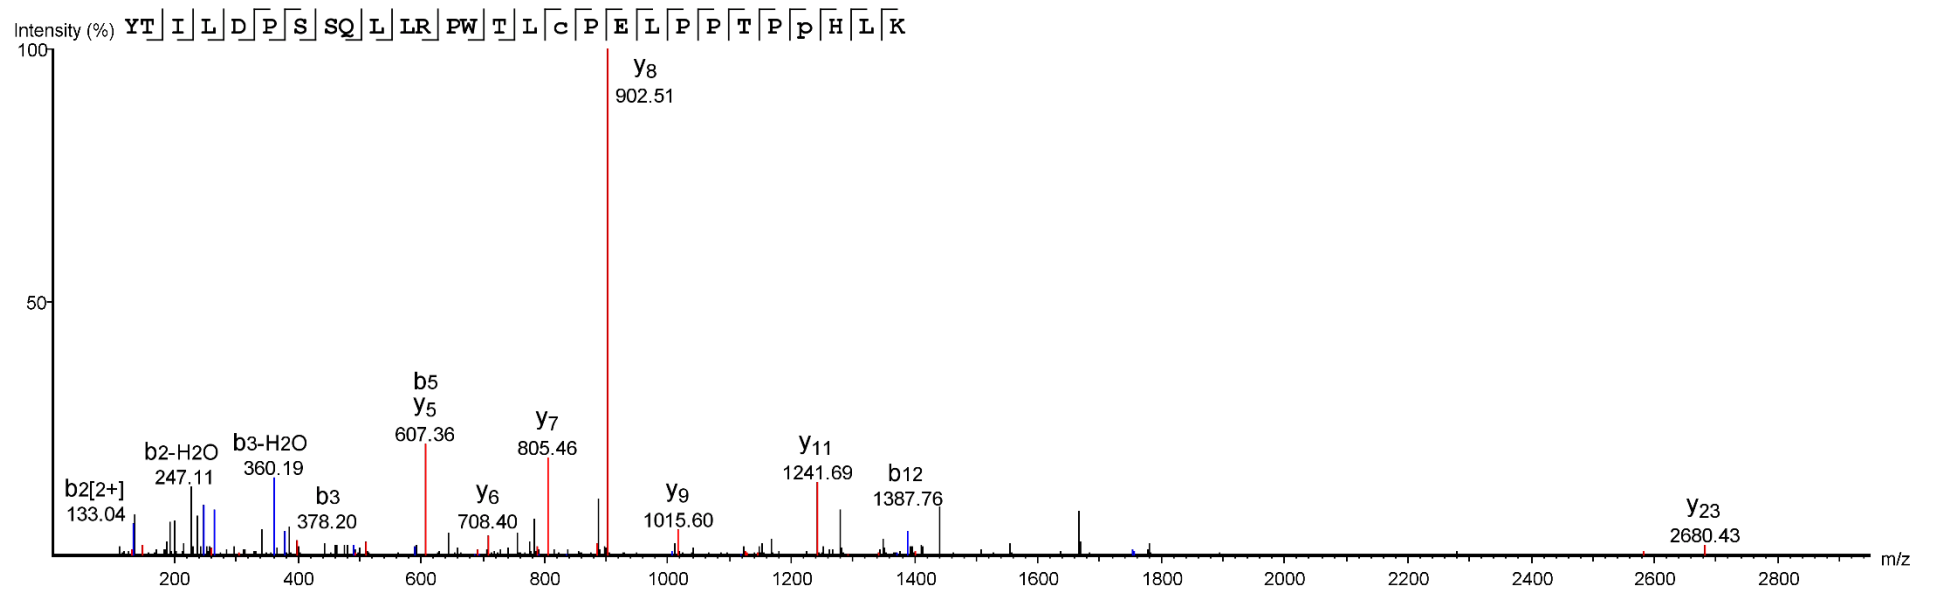

Pep14

Scan #17651

A-178: EPOR<sub>(426-453)</sub>: YTILDPSSQLLRPWTLC(+57.02)P(+15.99)ELPPTP(+15.99)HLK

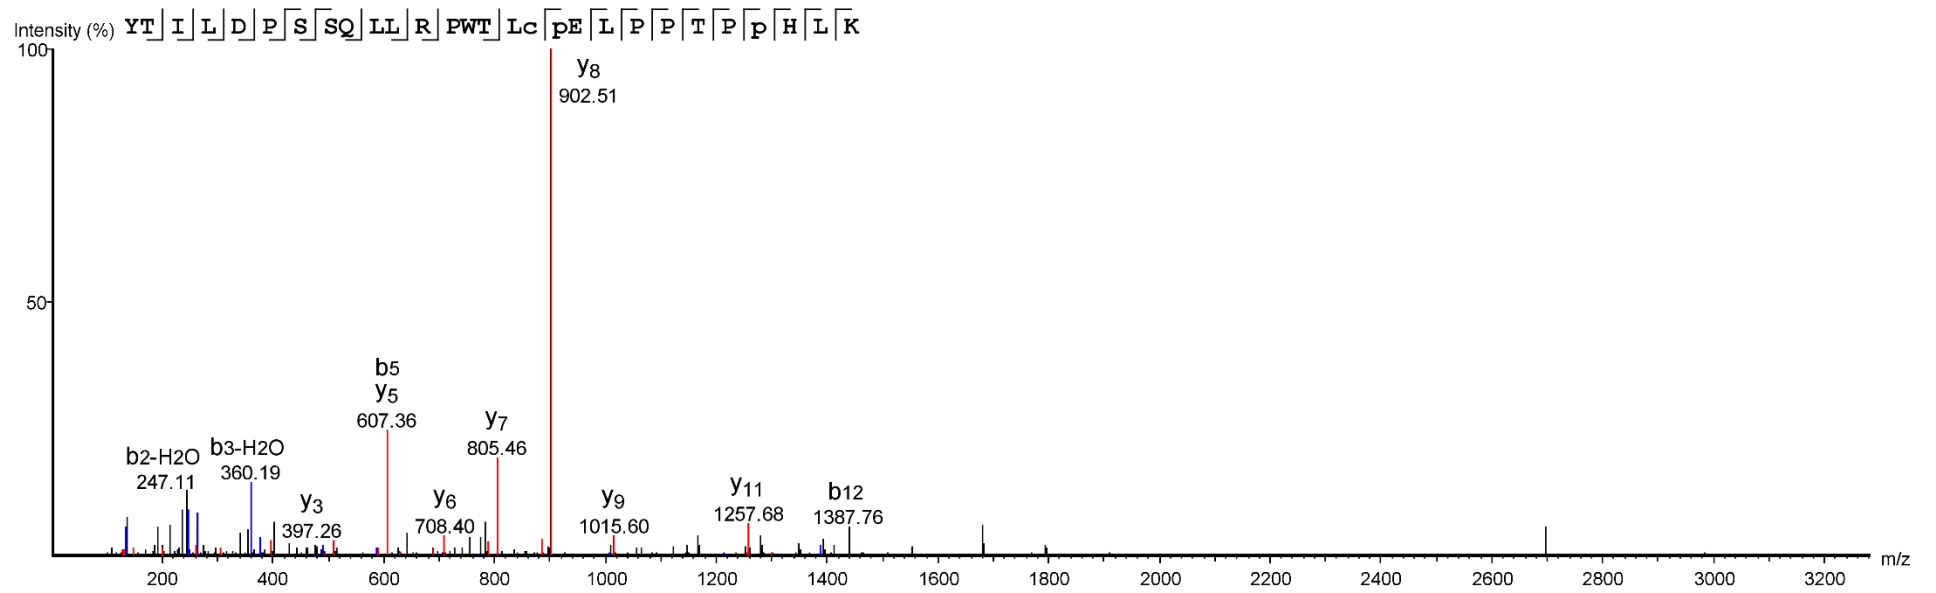

Pep14

Scan #16787



A-183: FLNA<sub>(2311-2333)</sub>: FNEEHIPDSPFVV<sup>P</sup>VASPSGDAR<sup>+</sup>

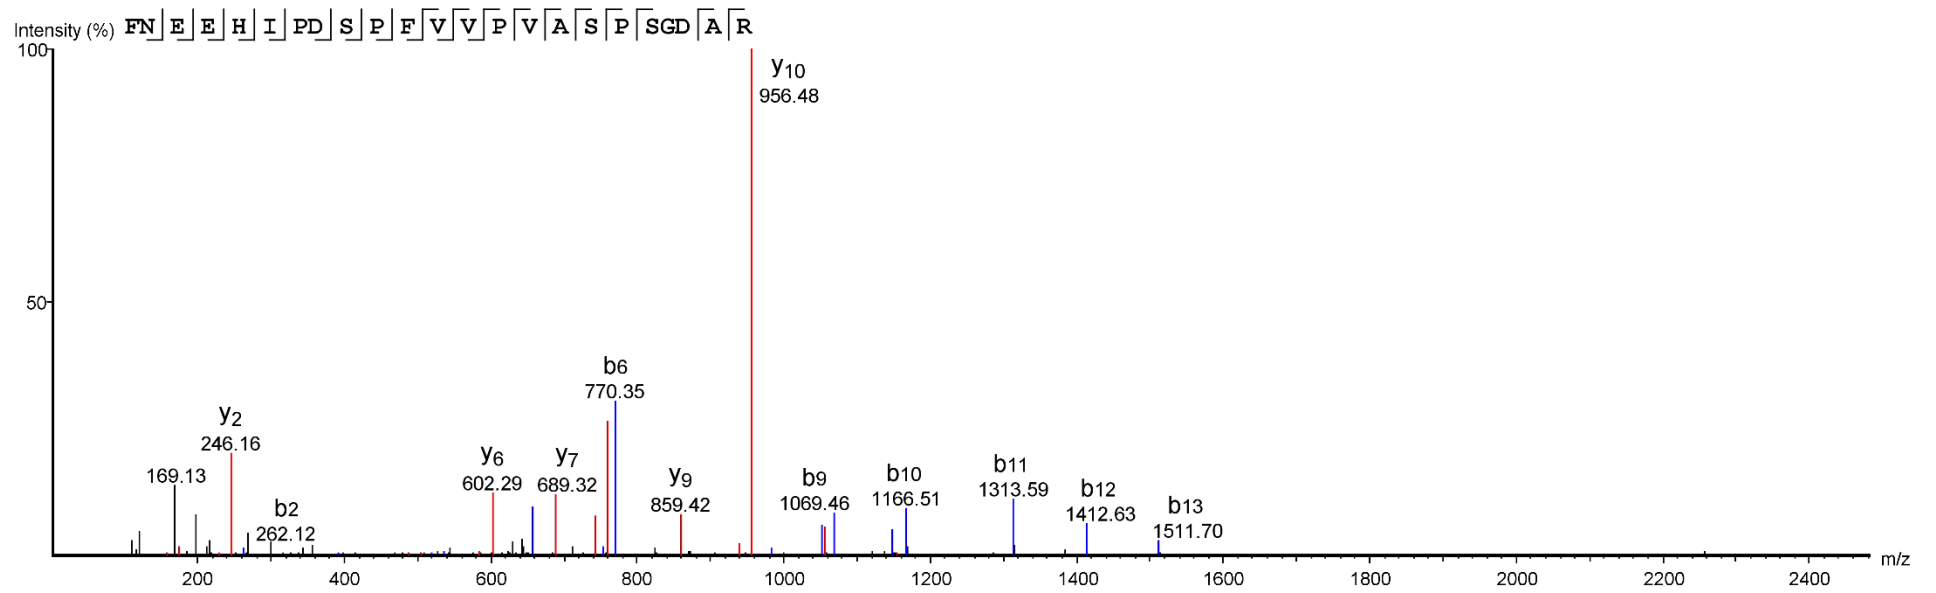

Pep20

Scan #8685

A-184: FLNA<sub>(2311-2333)</sub>: FNEEHIP(+15.99)DSPFVVPVASPSGDAR+

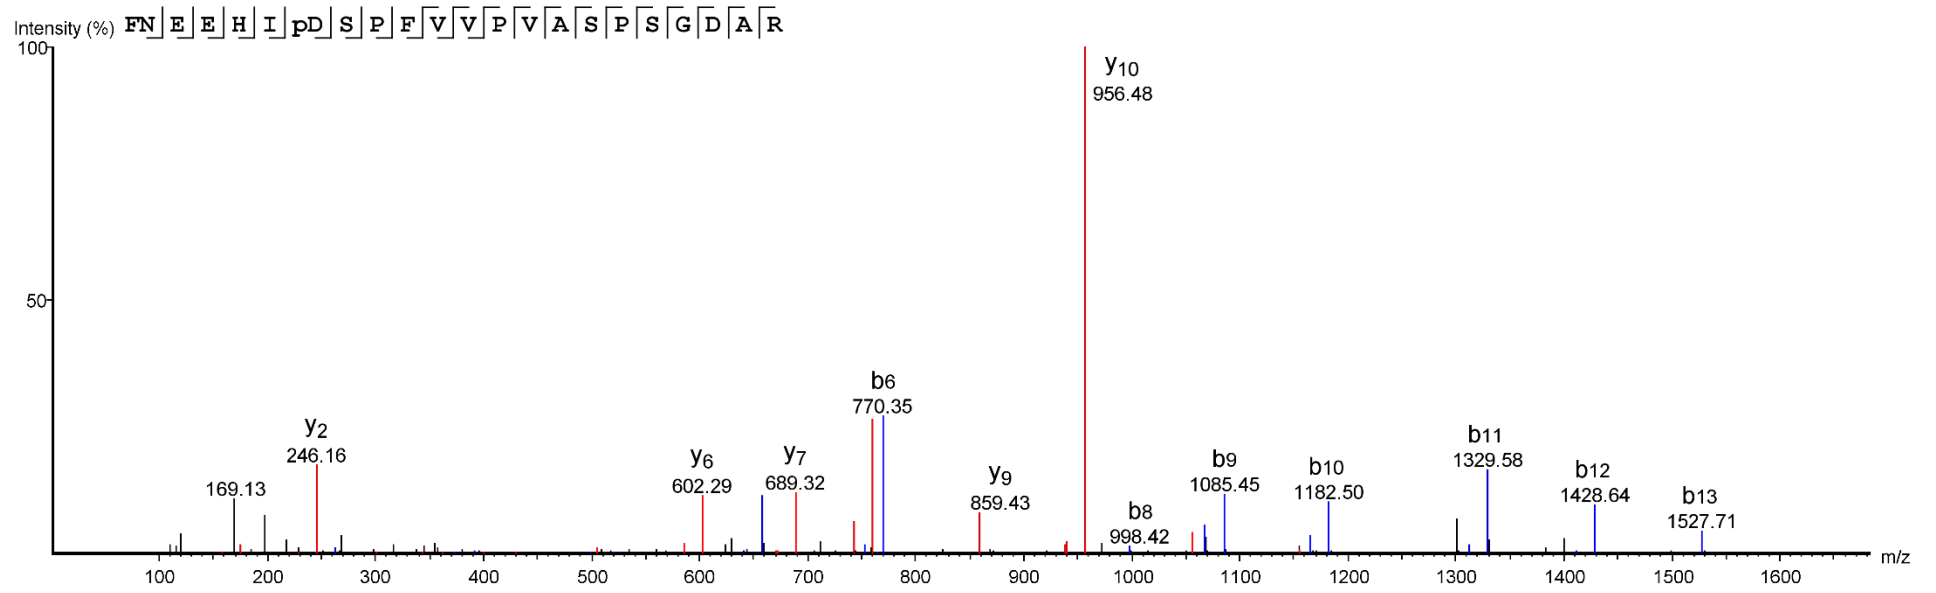

Pep20

Scan #8161

A-185: FLNA<sub>(2311-2333)</sub>: FNEEHIPDSPFVVP(+15.99)VASPGDAR+

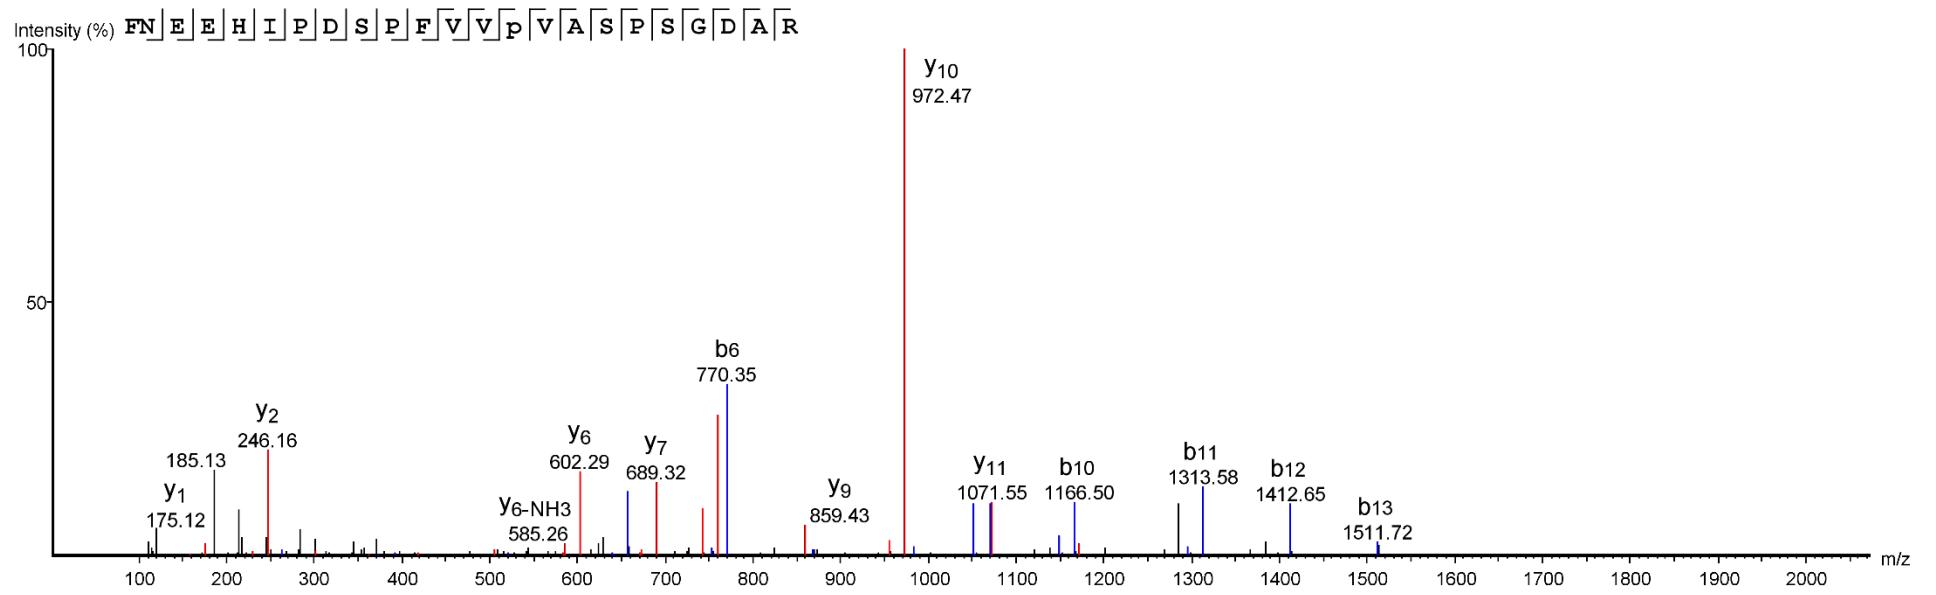

Pep20

Scan #7848

A-186: FLNA<sub>(2311-2333)</sub>: FNEEHIP(+15.99)DSPFVVP(+15.99)VASPSGDAR+

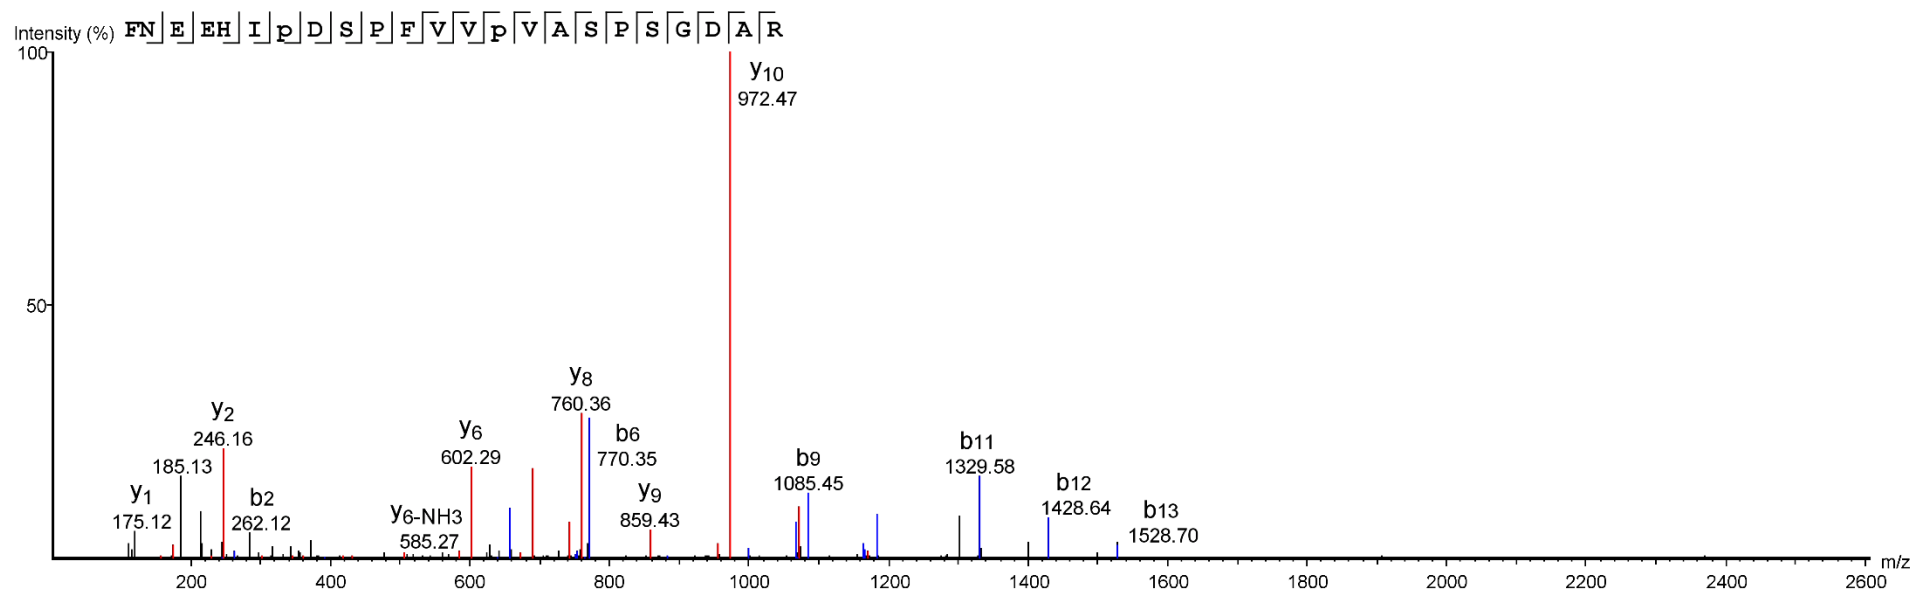

Pep20

Scan #7563

A-187: FLNA<sub>(2311-2333)</sub>: FNEEHIPDSPFVVPVAVSPSGDAR+

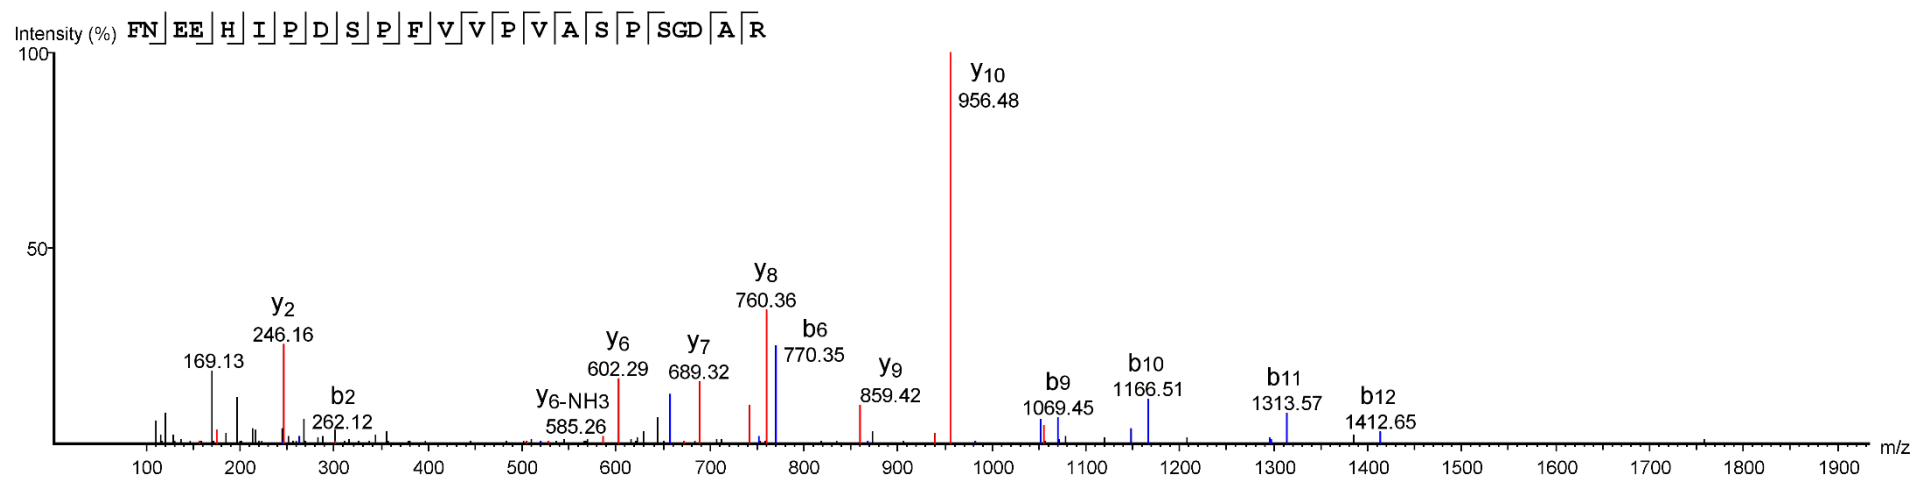

YMT65

Scan #15168

A-188: FLNA<sub>(2311-2333)</sub>: FNEEHIPDSPFVVPVASPSGDAR+

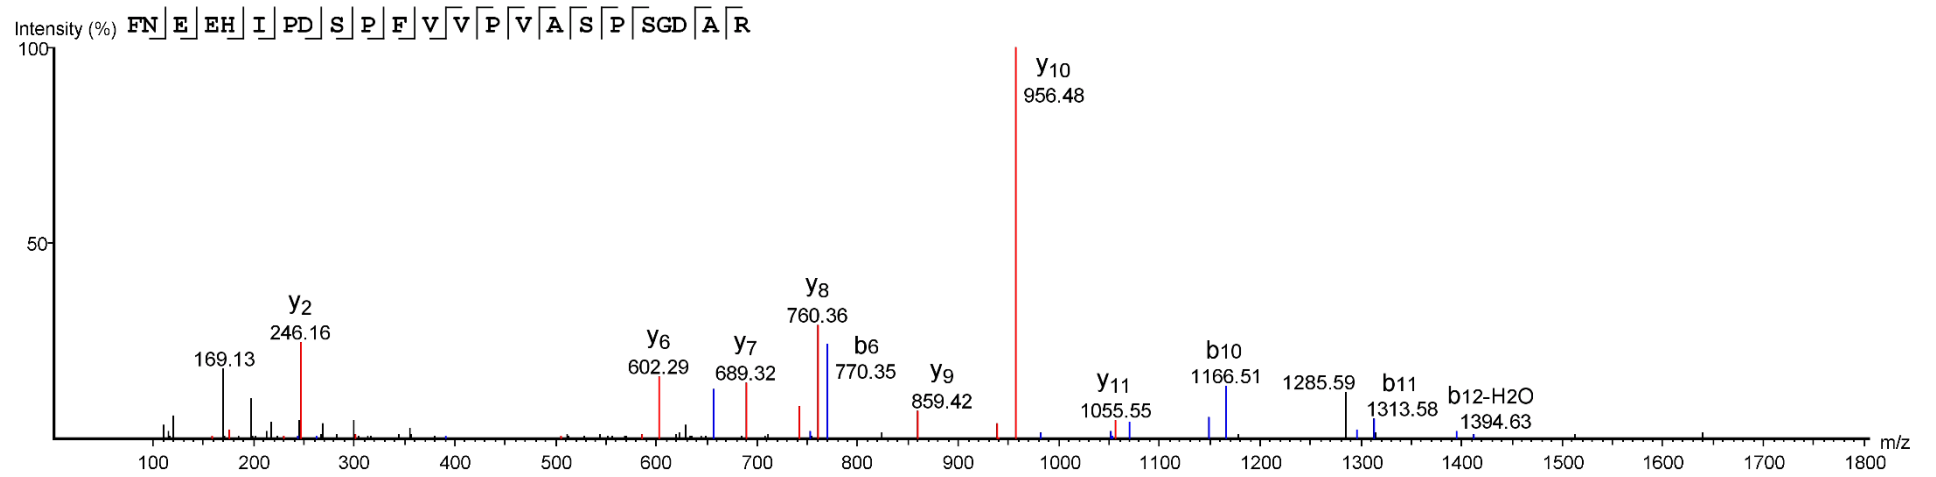

YMT66

Scan #15187

A-189: FOXO3<sub>(420-444)</sub>: GSGLGSP<sup>T</sup>SSFNSTVFGP<sup>S</sup>SSLNSLR

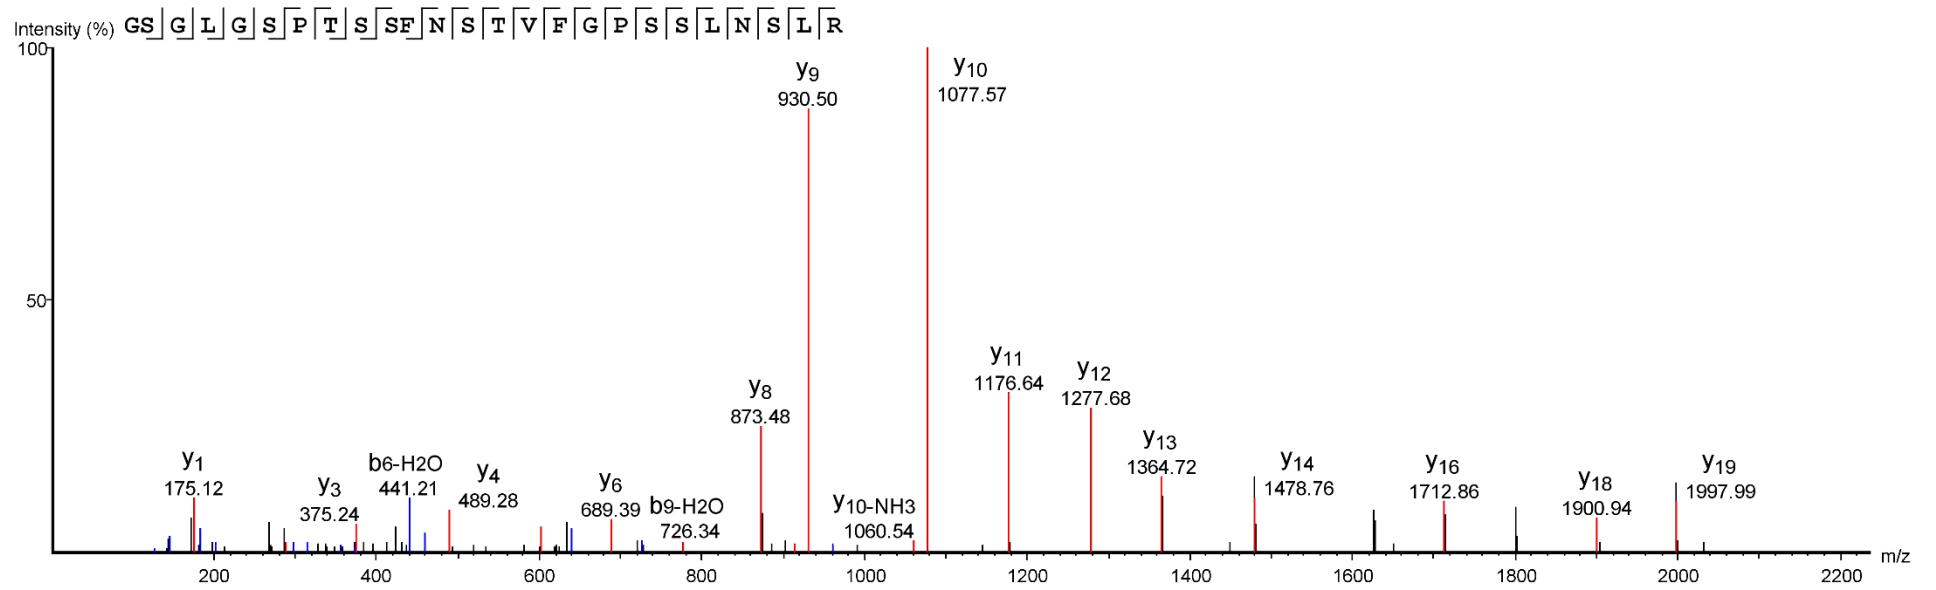

Pep14  
Scan  
#15621

A-190: FOXO3<sub>(420-444)</sub>: GSGLGSP(+15.99)TSSFNSTVFGPSSLNSLR

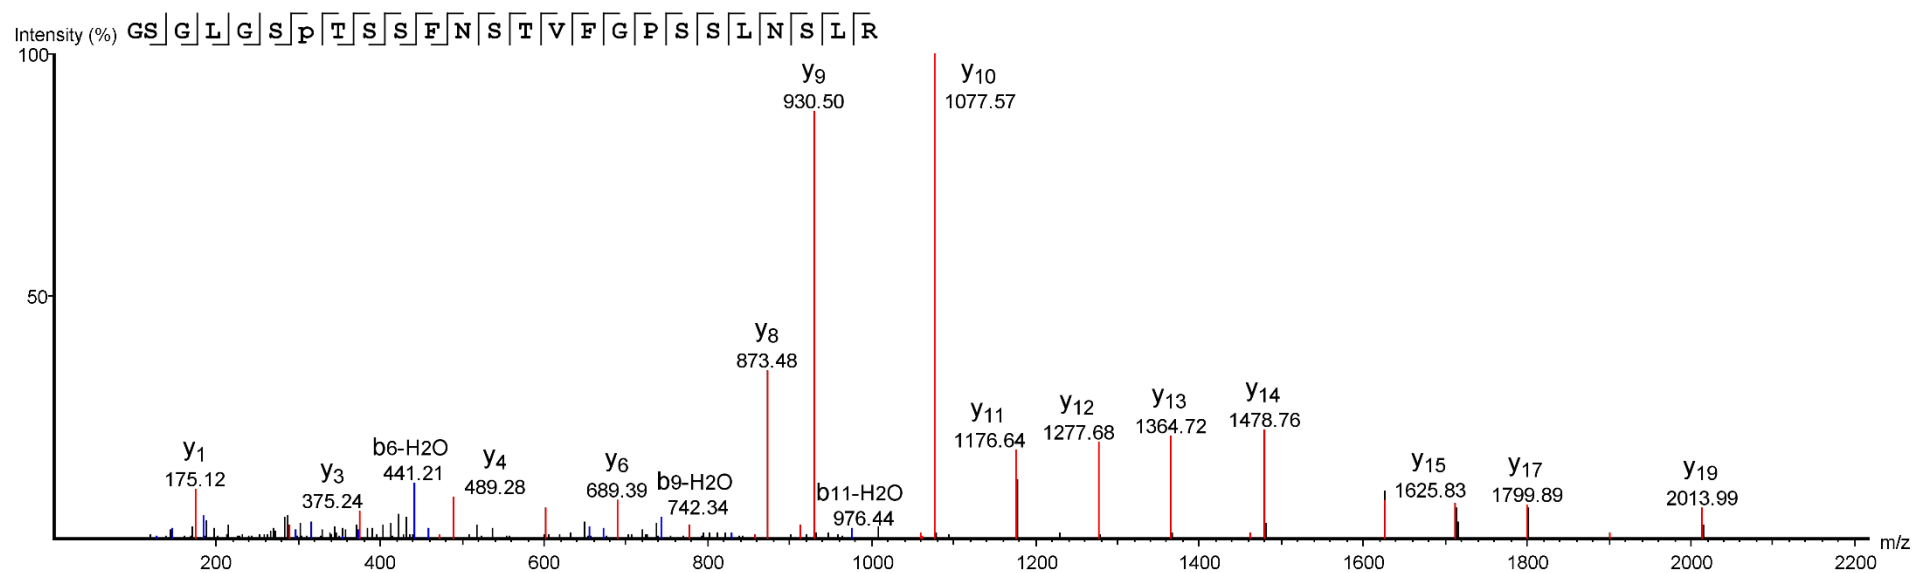

Pep14  
Scan  
#15012



A-191: FOXO3<sub>(420-444)</sub>: GSGLGSP<sup>(+15.99)</sup>TSSFNSTVFGP<sup>(+15.99)</sup>SSLNSLR

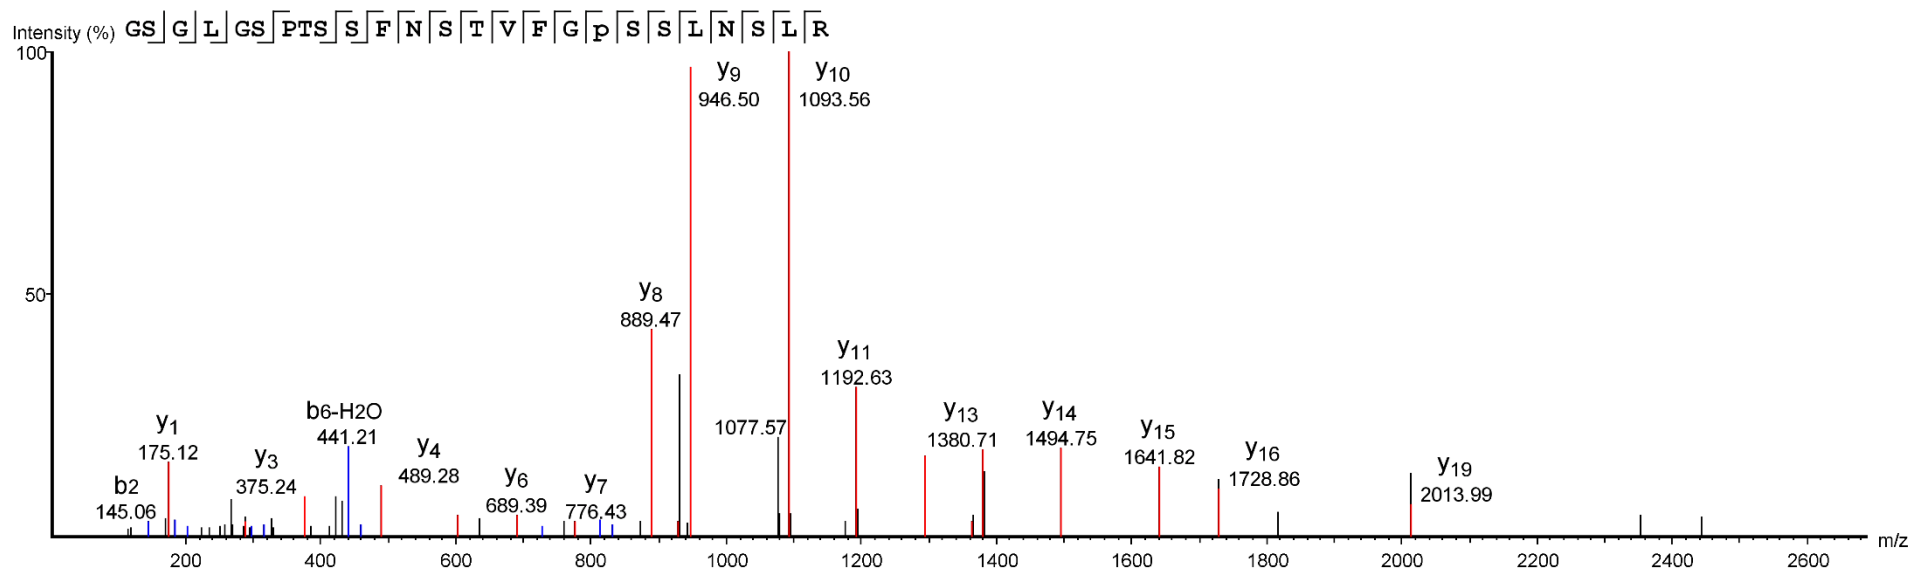

Pep14  
Scan  
#14963

A-192: FOXO3<sub>(420-444)</sub>: GSGLGSP(+15.99)TSSFNSTVFGP(+15.99)SSLNSLR

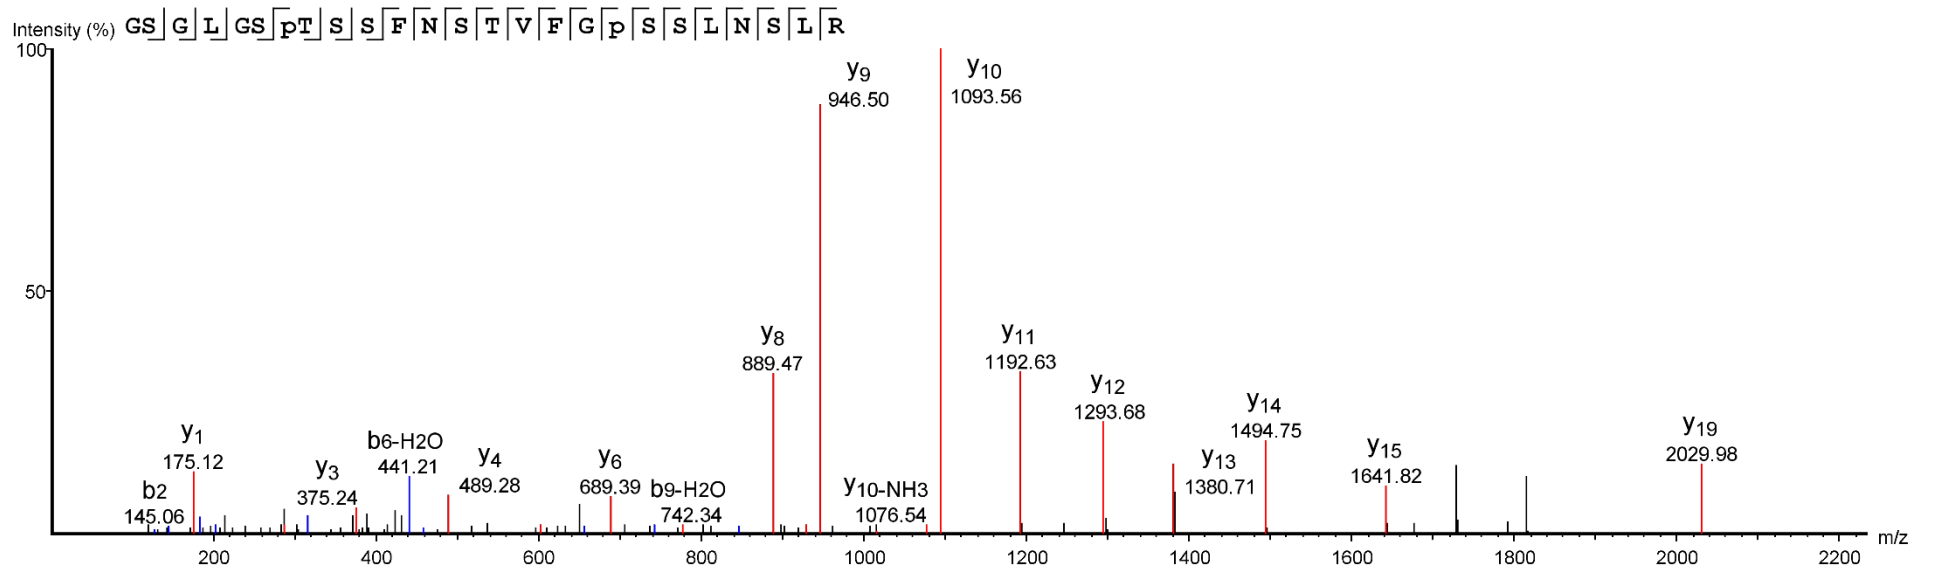

Pep14  
Scan  
#13988

A-193: FOXO3<sub>(420-444)</sub>: GSGLGSP**T**SSFNSTVFG**P**SSLNSLR

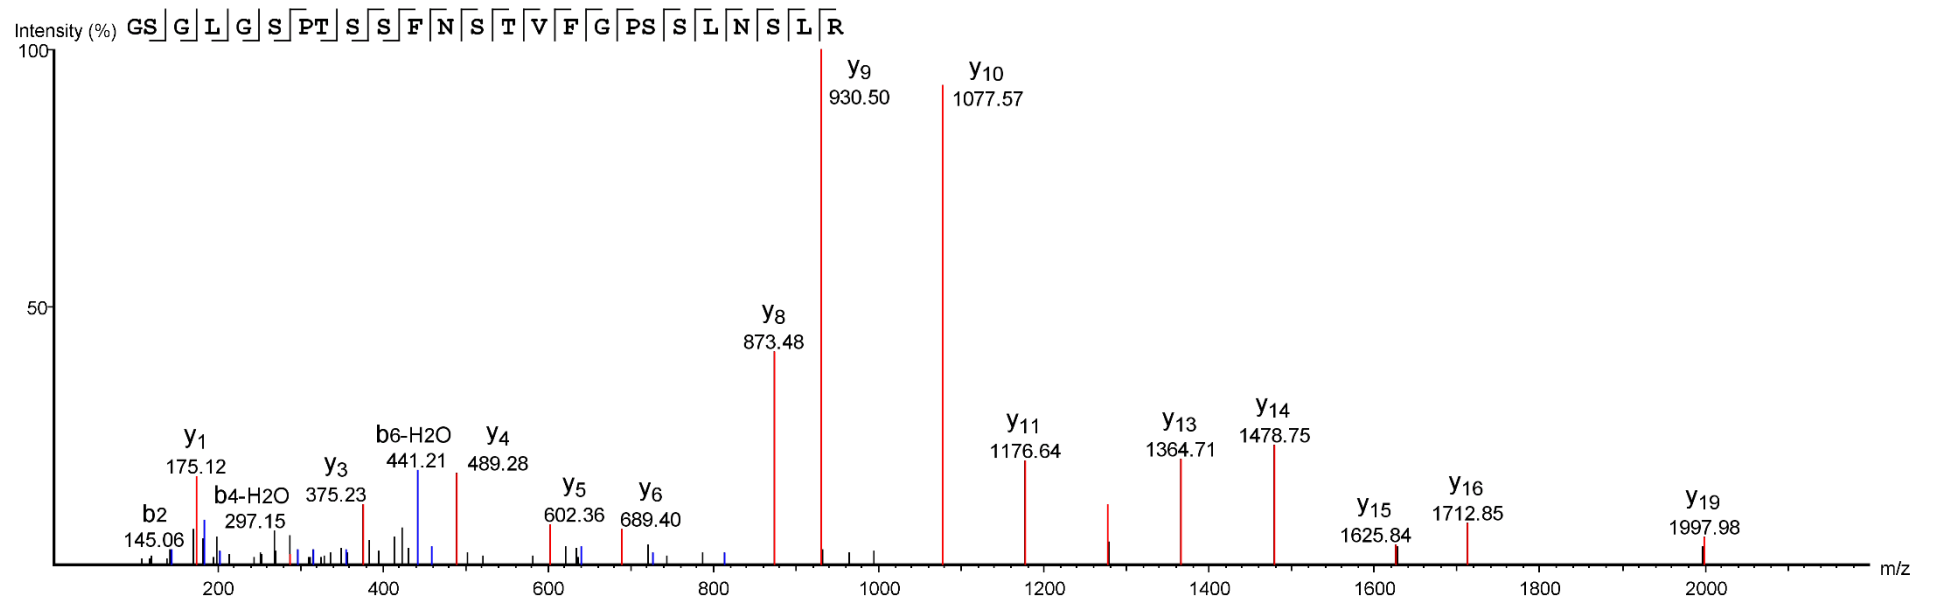

YMT59

Scan

#18279

A-194: FOXO3<sub>(420-444)</sub>: GSGLGSP**T**SSFNSTVFG**P**SSLNSLR

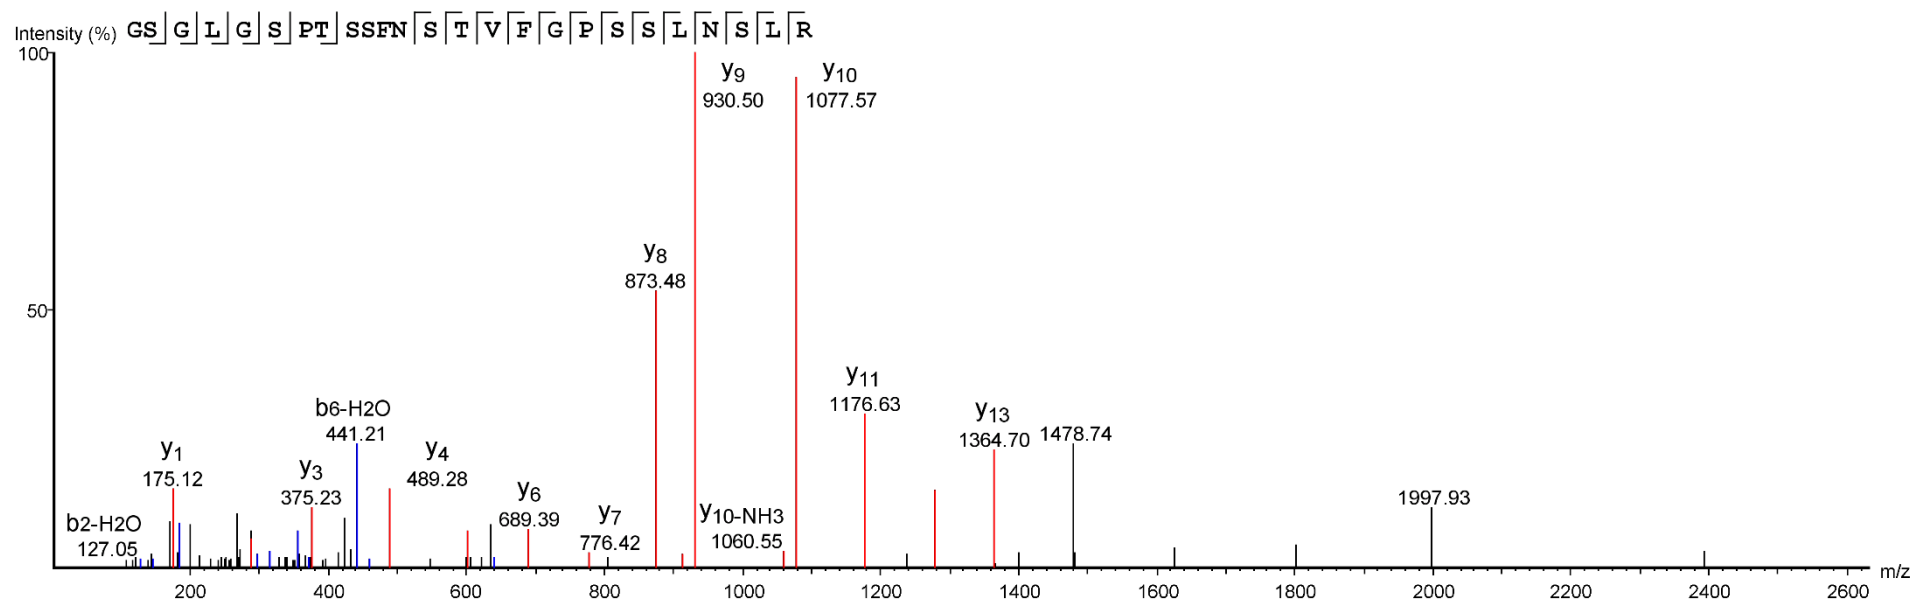

YMT60

Scan

#18433

A-195: IKBKB<sub>(172-198)</sub>: ELDQGS LC(+57.02)TSFVGT LQYLAPELLEQQK

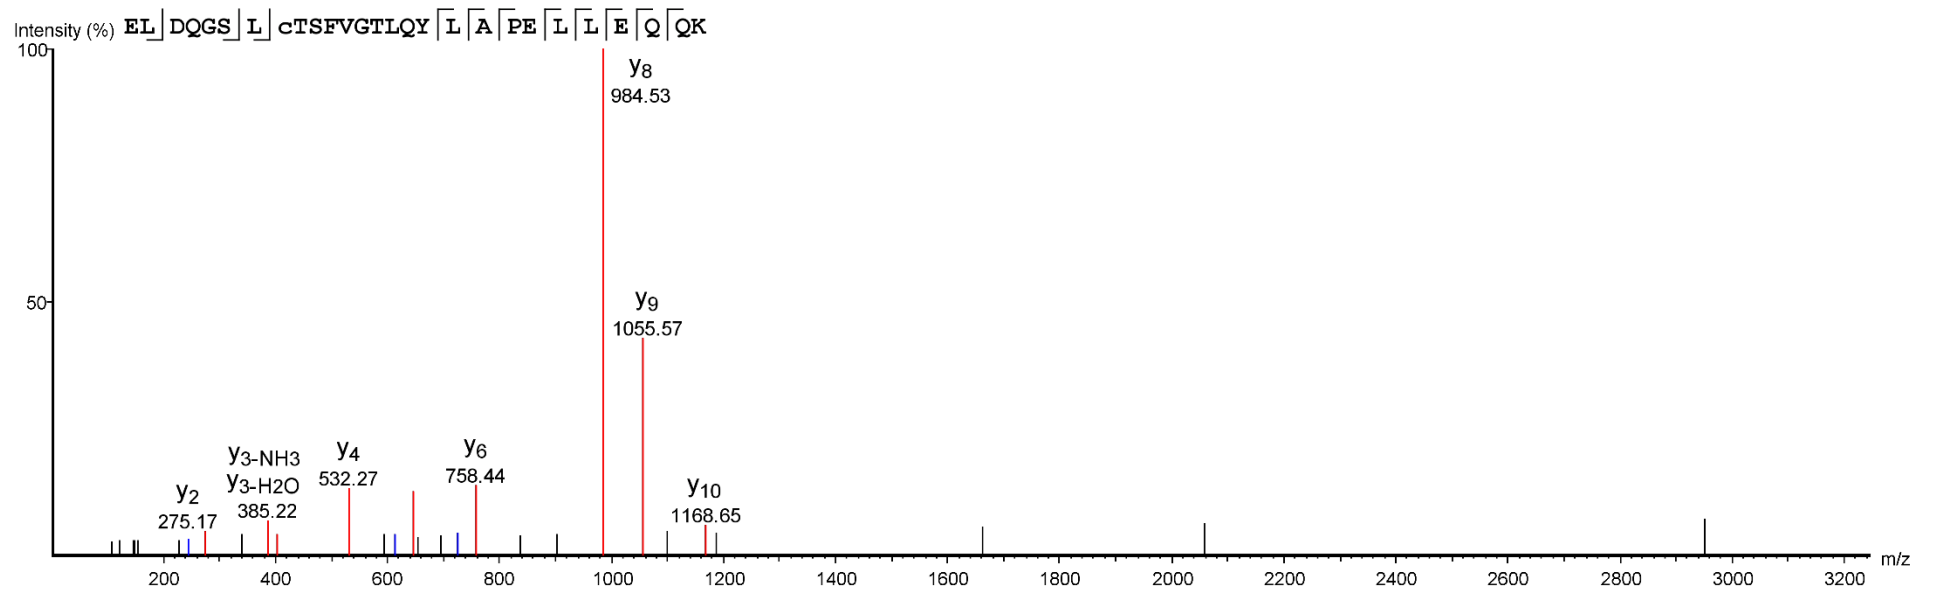

Pep27:  
Scan #24625

A-196: IKBKB<sub>(172-198)</sub>: ELDQGLC(+57.02)TSFVGT[LQYLAP]ELLEQQK

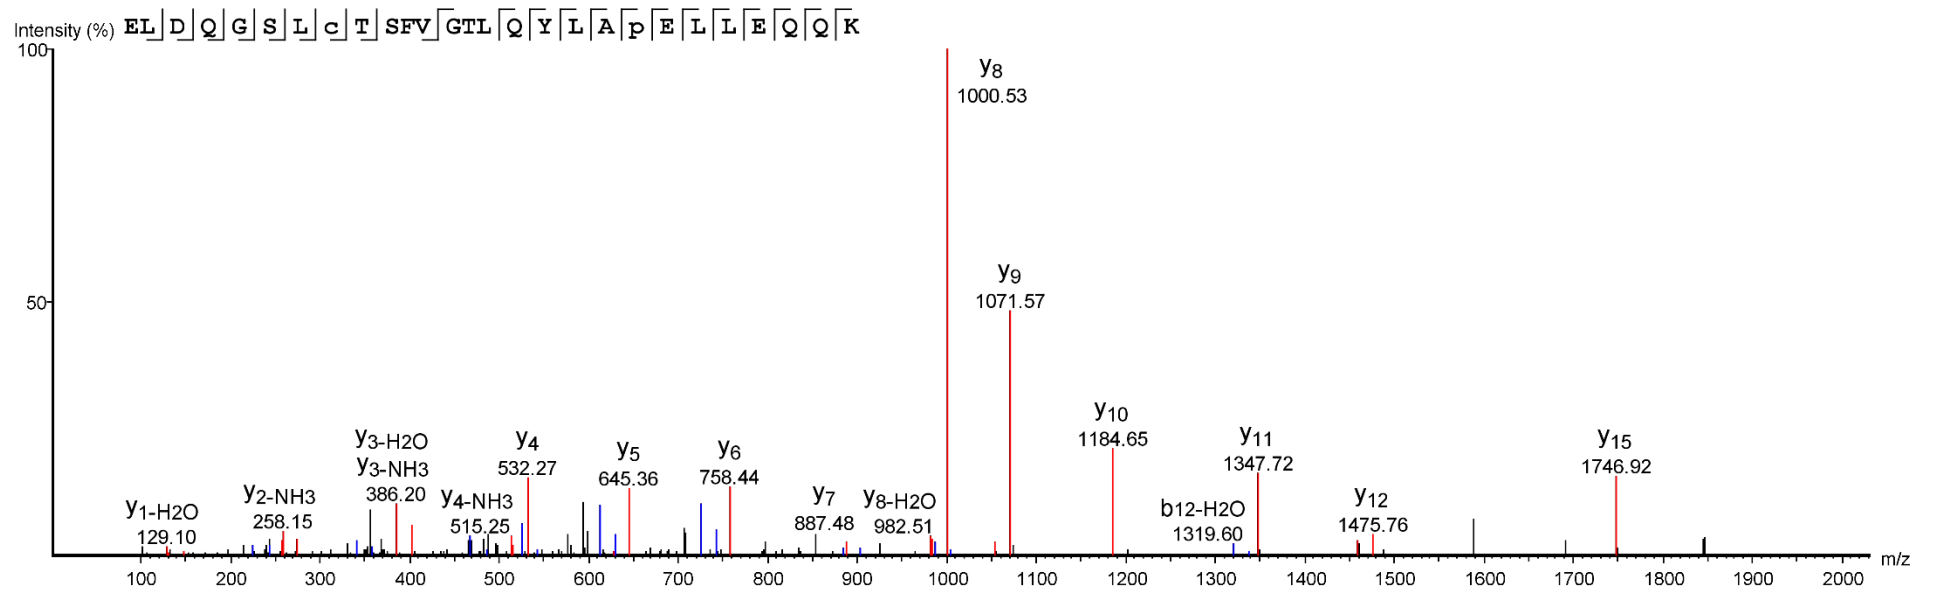

Pep27:

Scan #24433

A-197: IKBKB<sub>(172-198)</sub>: ELDQGLC(+57.02)TSFVGTLOYLAPELLEQQK

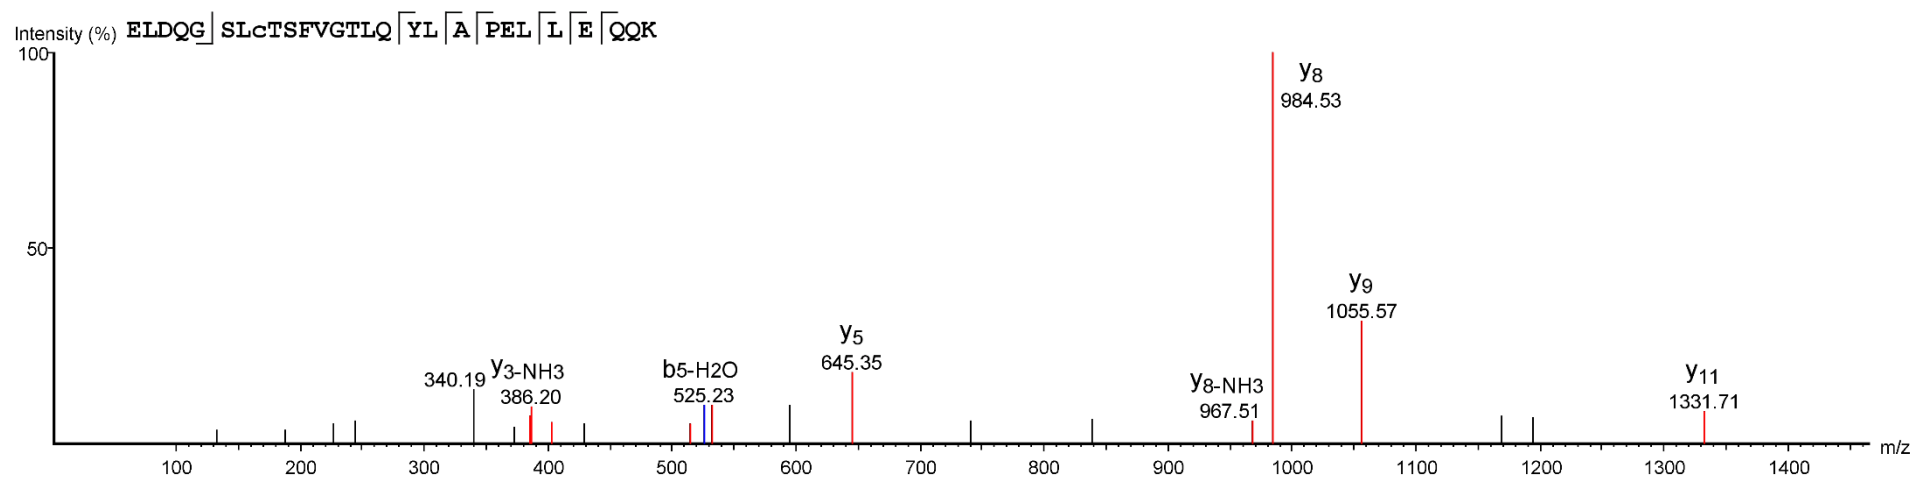

YMT59:  
Scan #25756

A-198: IKBKB<sub>(172-198)</sub>: ELDQGS LC(+57.02)TSFVGT LQYLAPELLEQQK

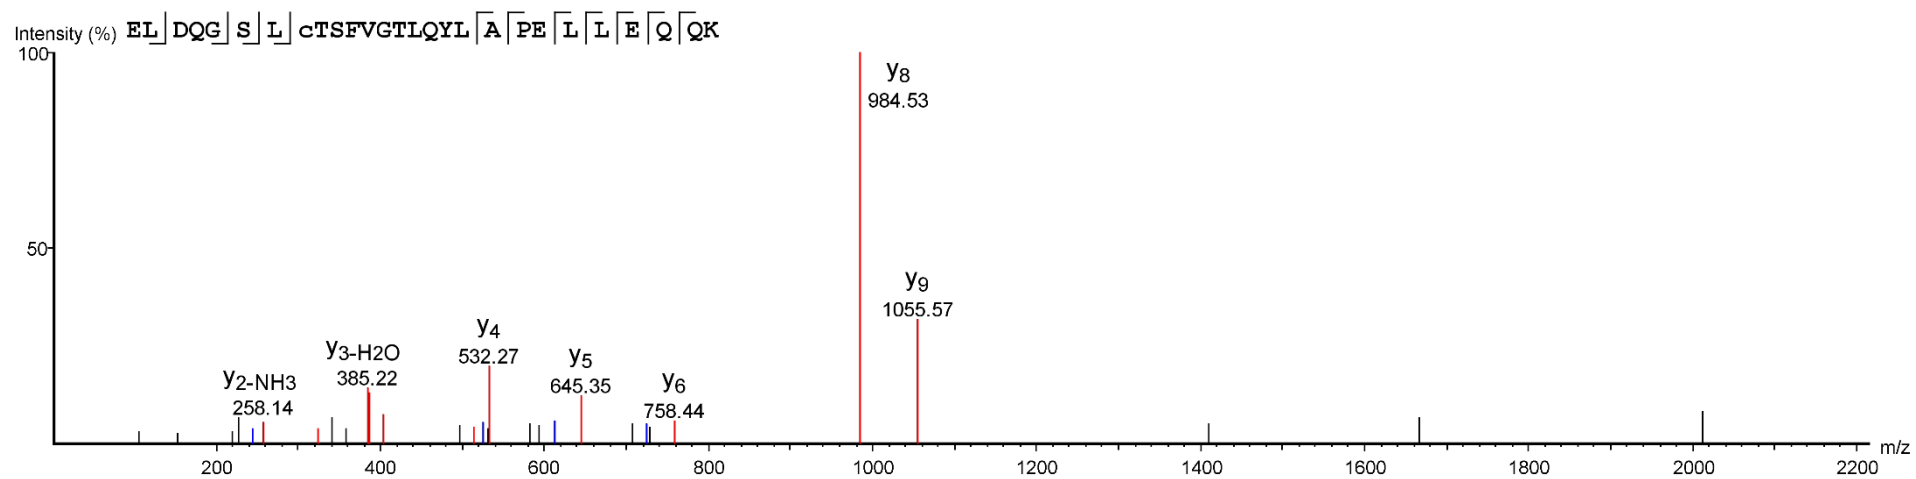

YMT60:  
Scan #26206



A-199: MAPK6<sub>(20-45)</sub>: YMDLKPLGC(+57.02)GGNGLVFSAVDNDcDKR

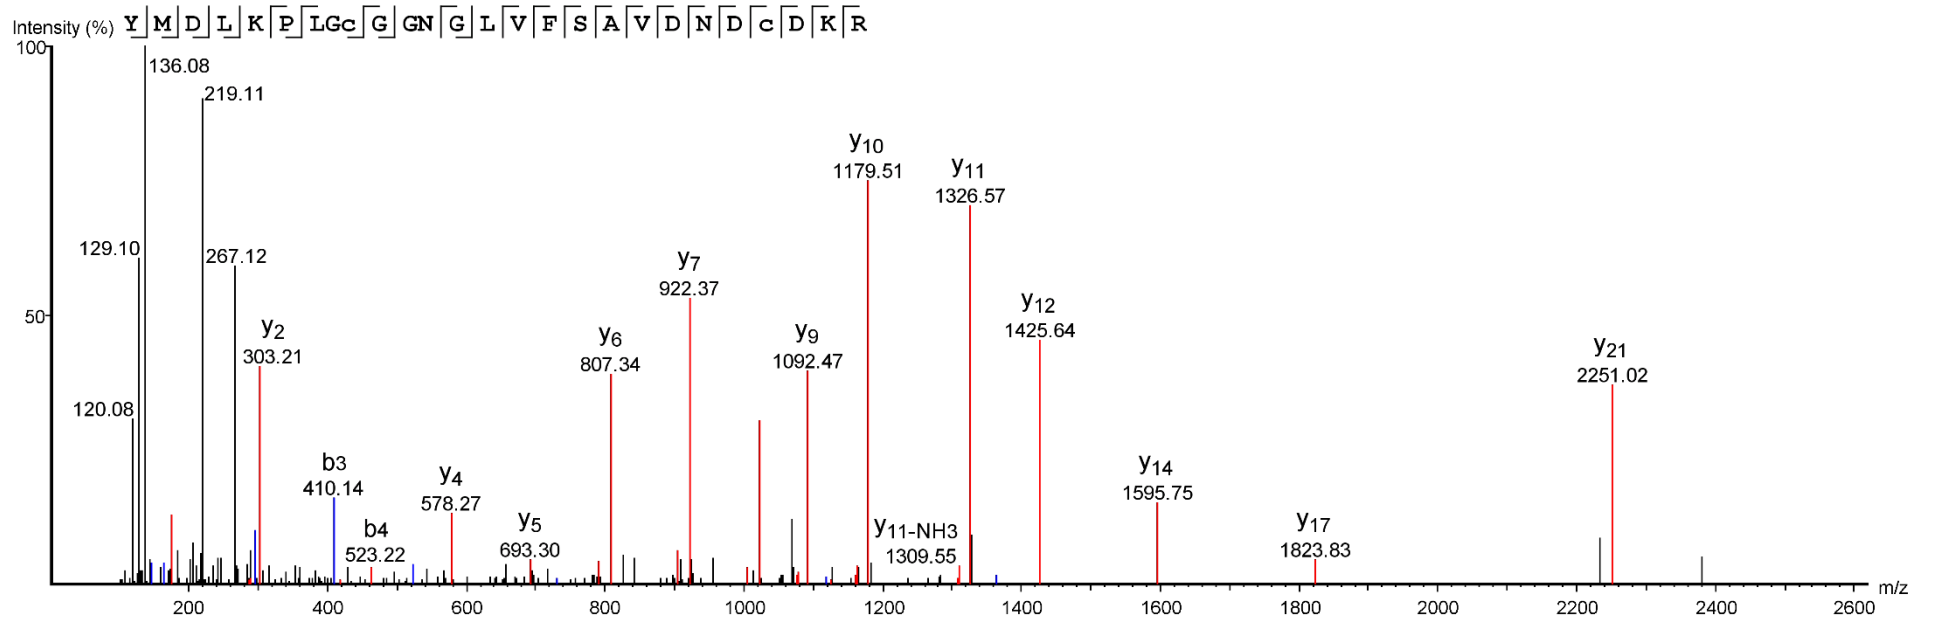

Pep17  
Scan  
#13503

A-200: MAPK6<sub>(20-45)</sub>: YM(+15.99)DLKPLGC(+57.02)GGNGLVFSAVDNDNDcDKR

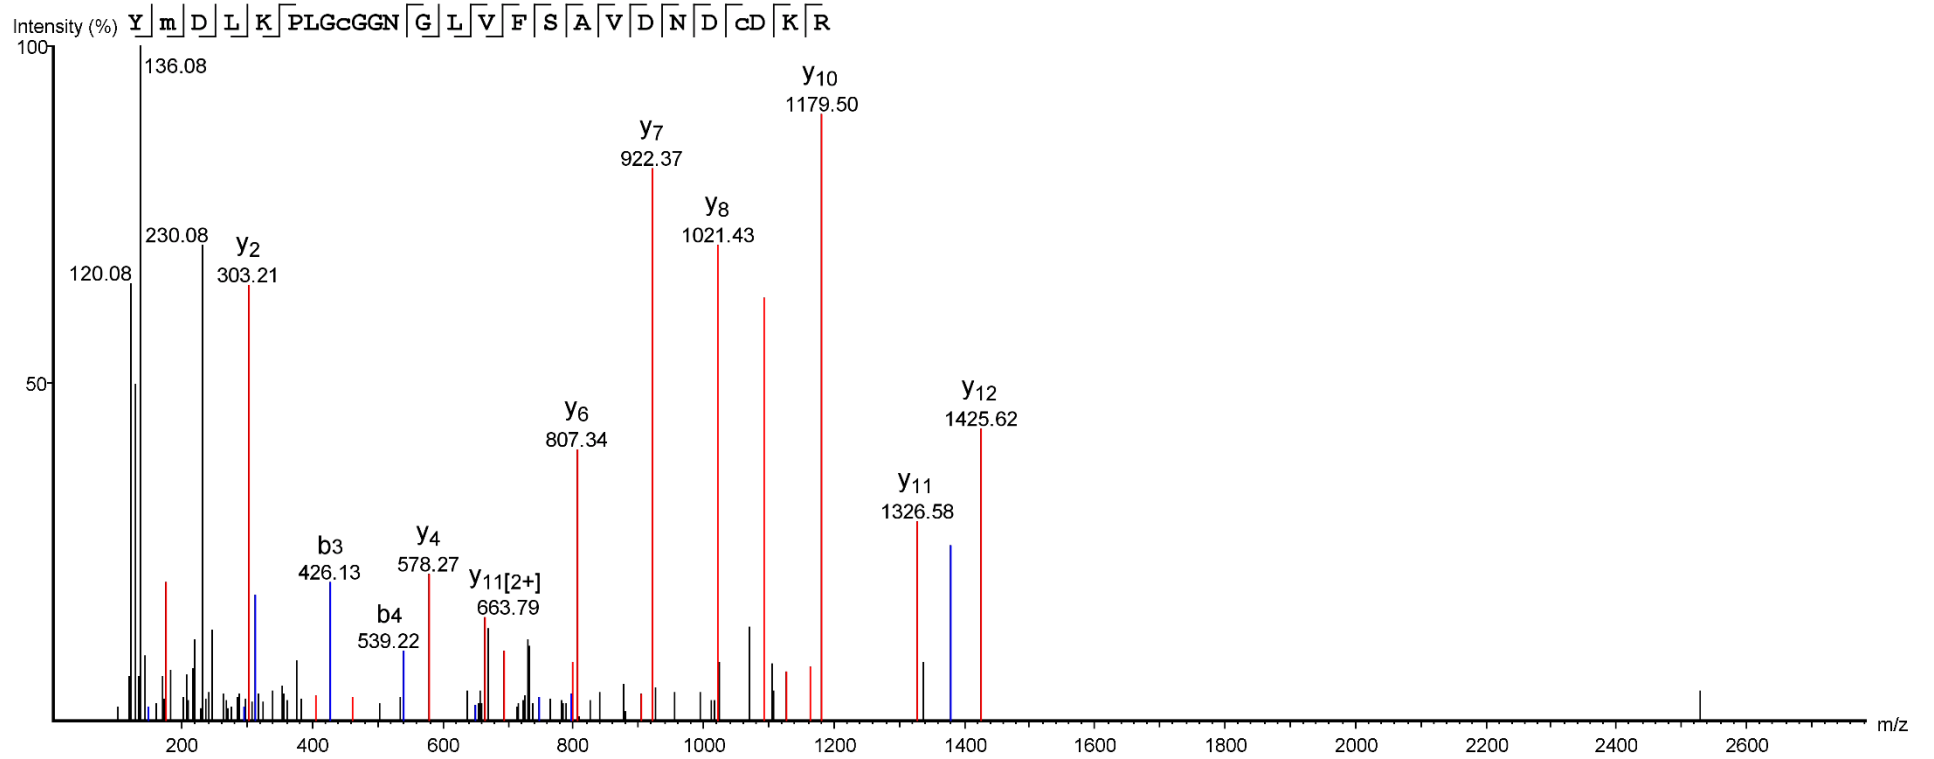

Pep17  
Scan  
#11999

A-201: MAPK6<sub>(20-45)</sub>: YMDLKP(+15.99)LGC(+57.02)GGNGLVFSAVDNDNC(+57.02)DKR

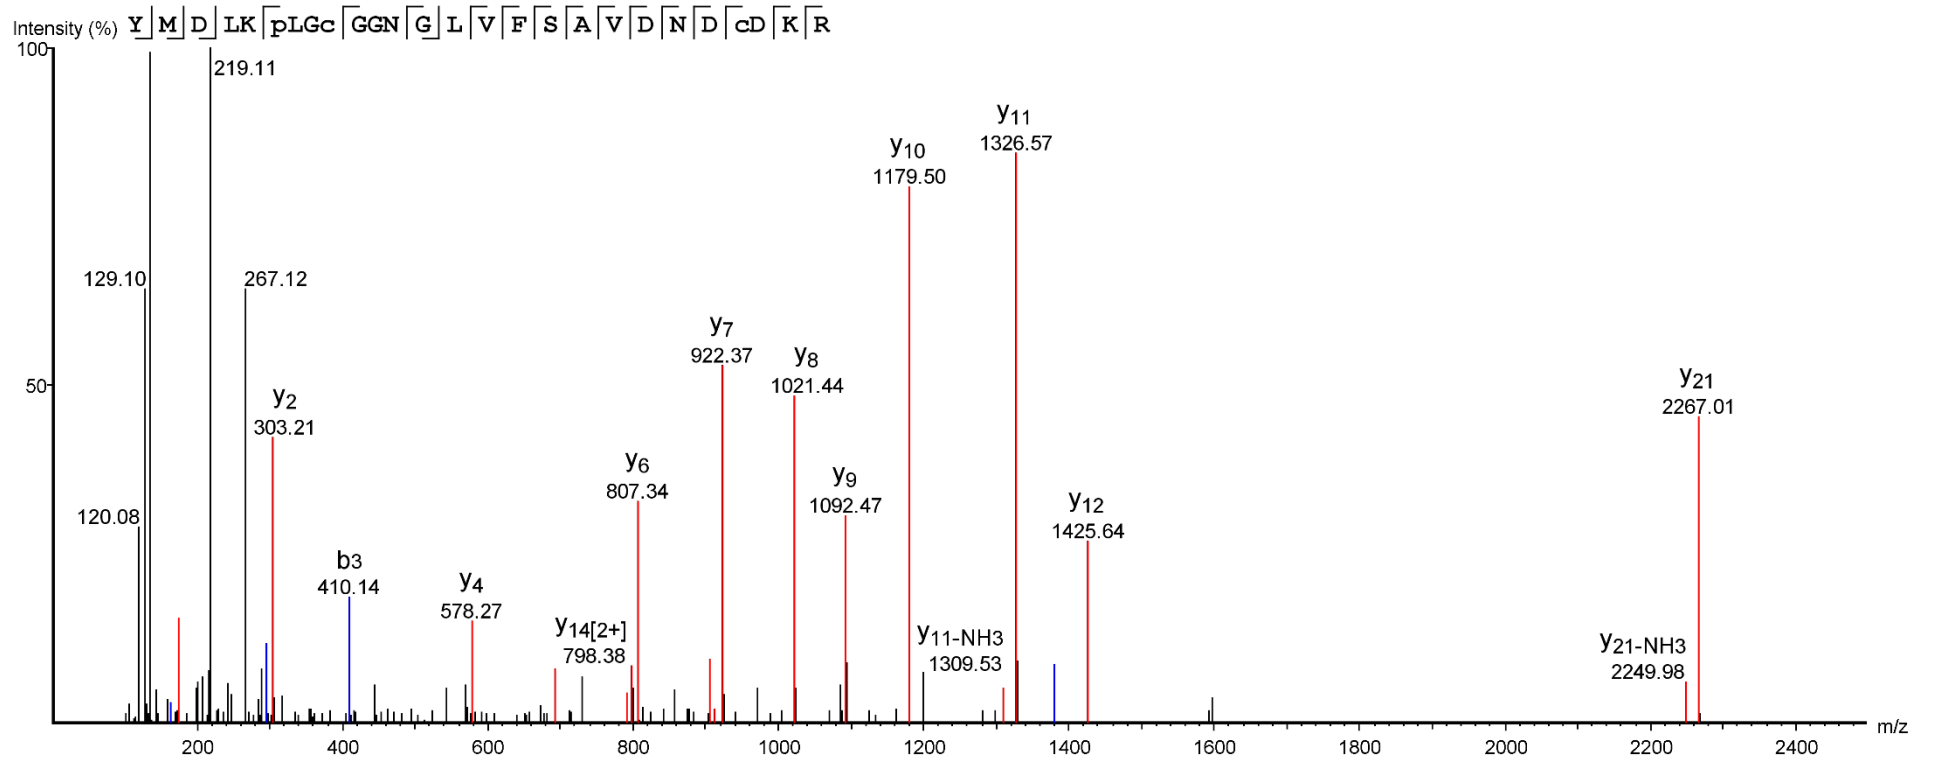

Pep17  
Scan  
#13087

A-202: MAPK6<sub>(20-45)</sub>: YM(+15.99)DLK**P(+15.99)**LGC(+57.02)GGNGLVFSAVDNDND**C(+57.02)**DKR

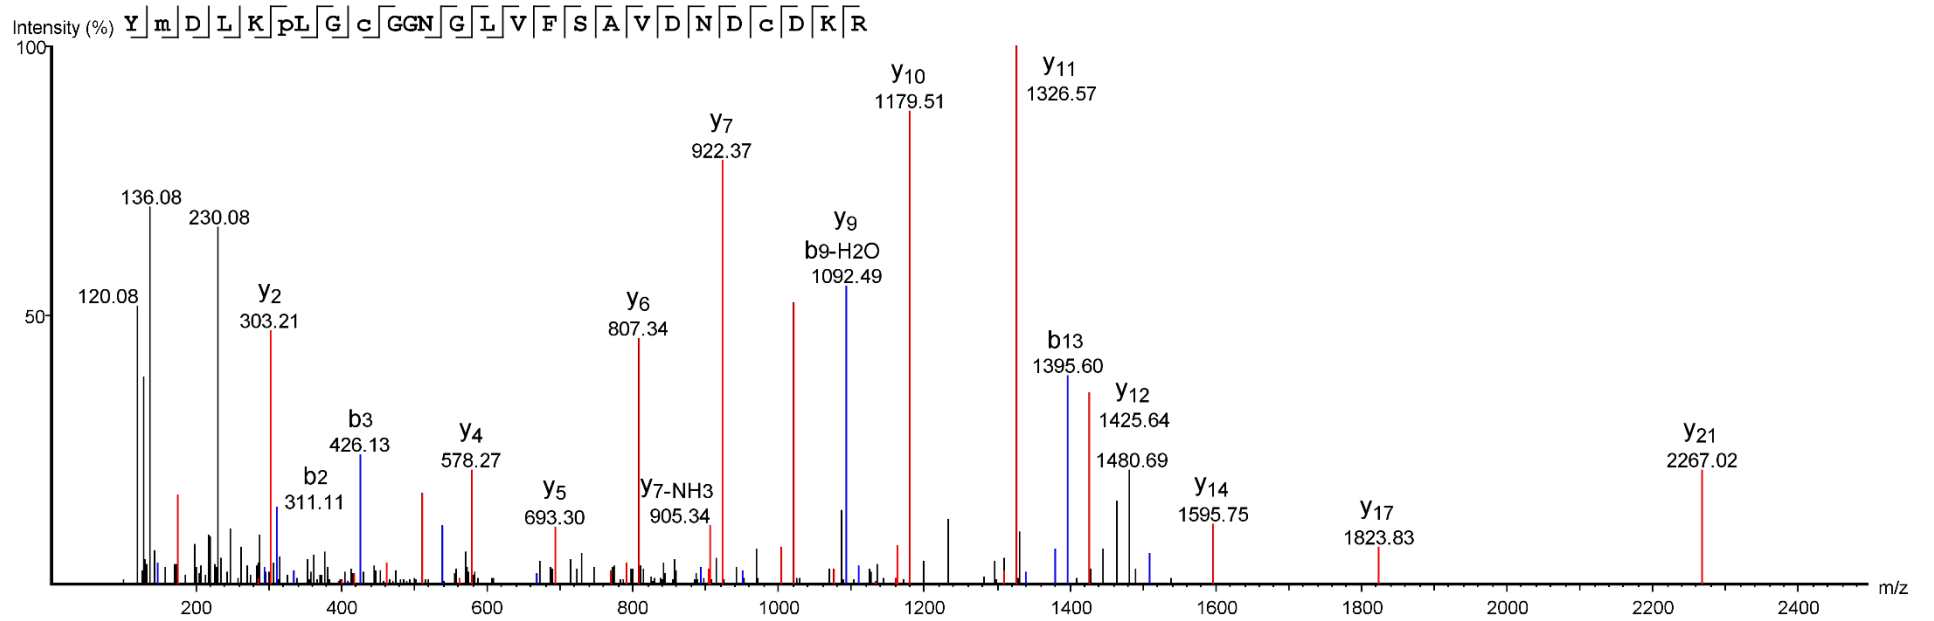

Pep17  
Scan  
#11327

A-203: MAPK6<sub>(20-45)</sub>: YMDLKPLGC(+57.02)GGNGLVFSAVDNDNC(+57.02)DKR

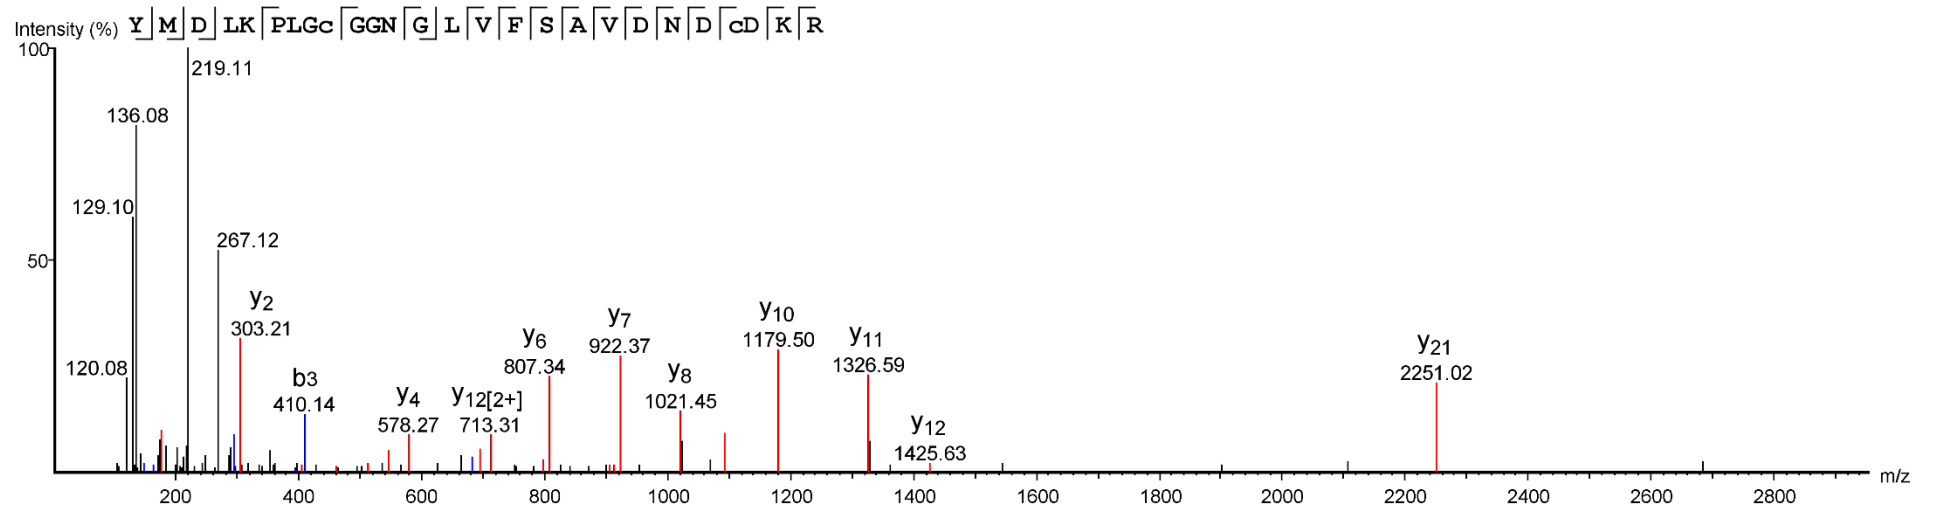

YMT31

Scan

#15317

A-204: MAPK6<sub>(20-45)</sub>: YMDLKPLGC(+57.02)GGNGLVFSAVDNDcDKR

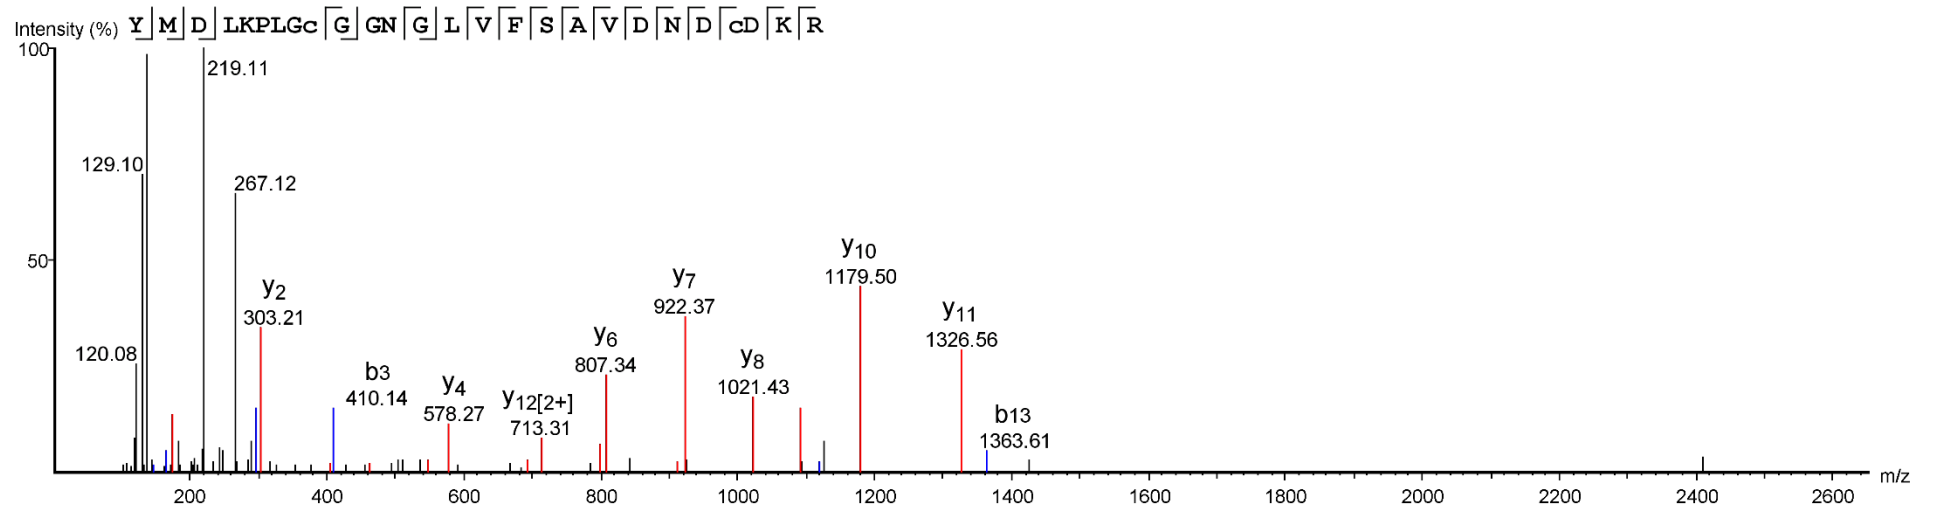

YMT32

Scan

#16233

A-205: MAPK6<sub>(20-45)</sub>: YM(+15.99)DLKPLGC(+57.02)GGNGLVFSAVDNDNC(+57.02)DKR

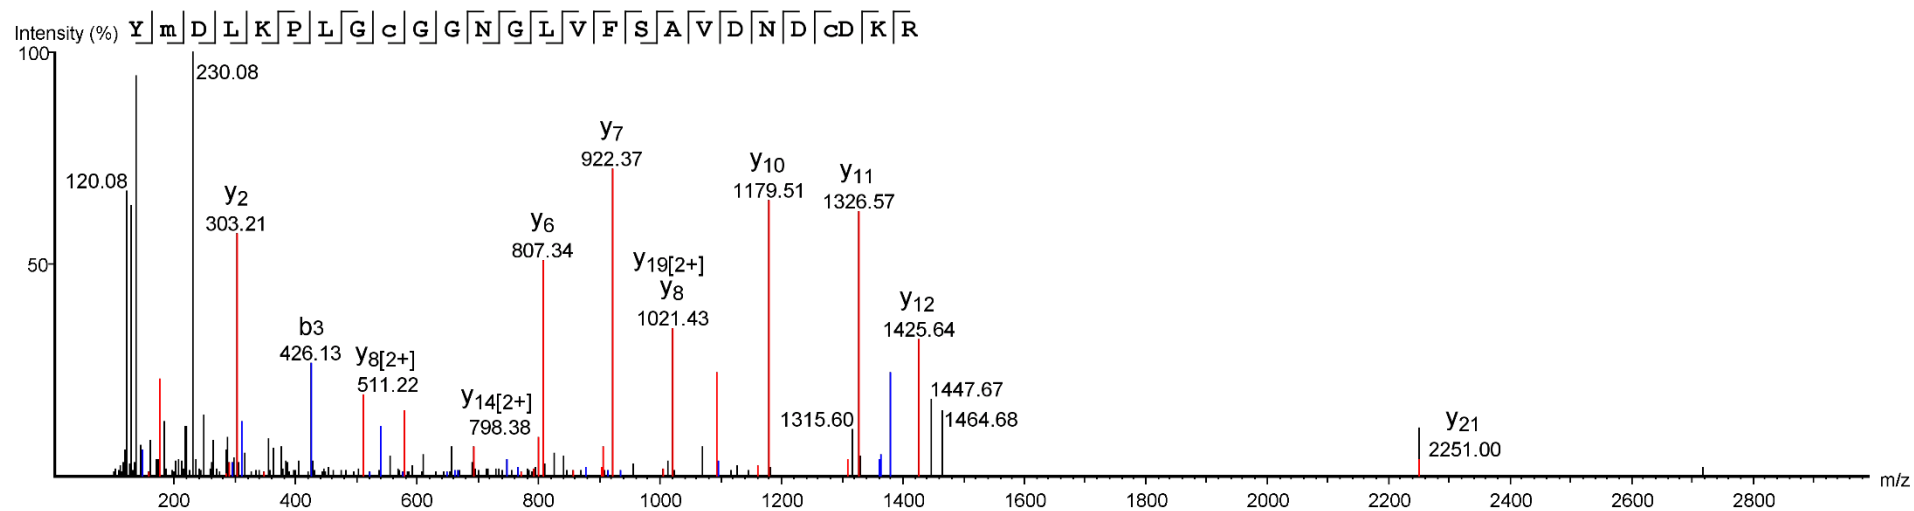

YMT31

Scan

#13401

A-206: MAPK6<sub>(20-45)</sub>: YM(+15.99)DLKPLGC(+57.02)GGNGLVFSAVDNDNC(+57.02)DKR

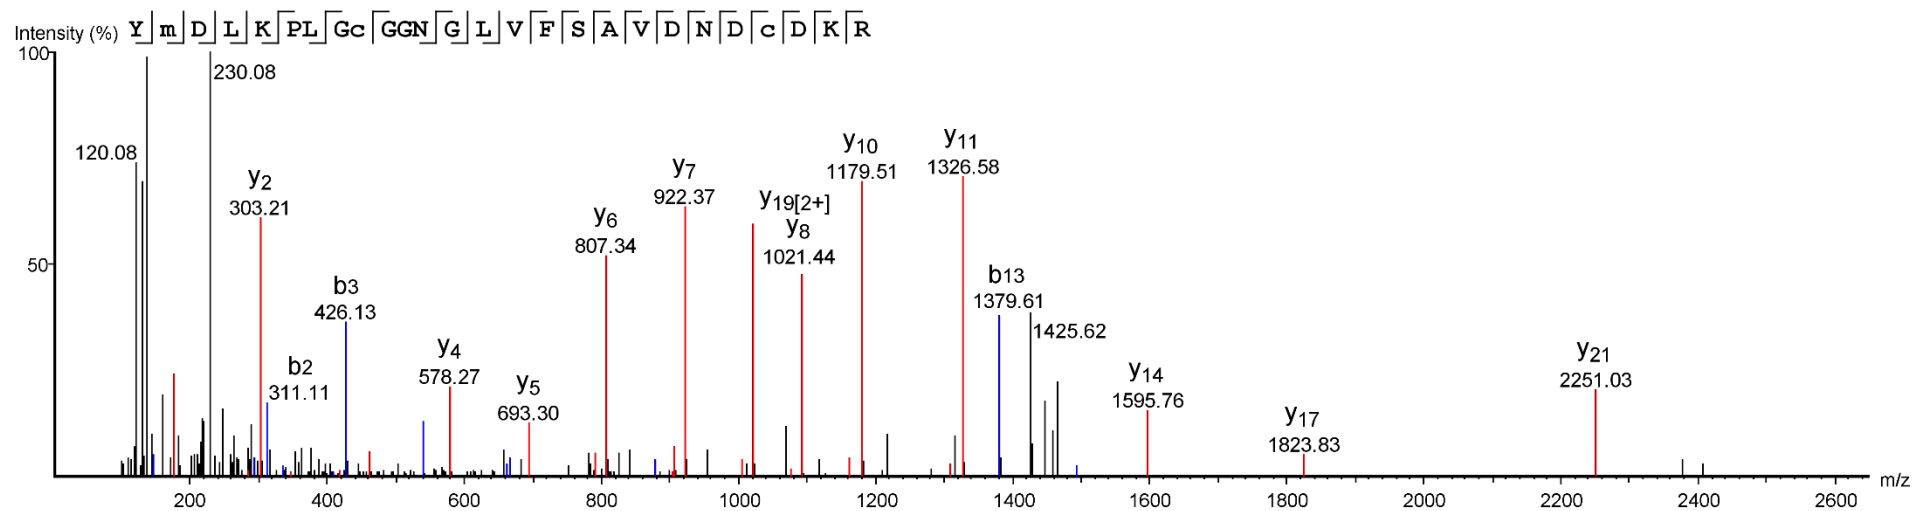

YMT32

Scan

#14193



A-207: NDRG3<sub>(287-301)</sub>: MADC(+57.02)GGLPQVVQPGRK

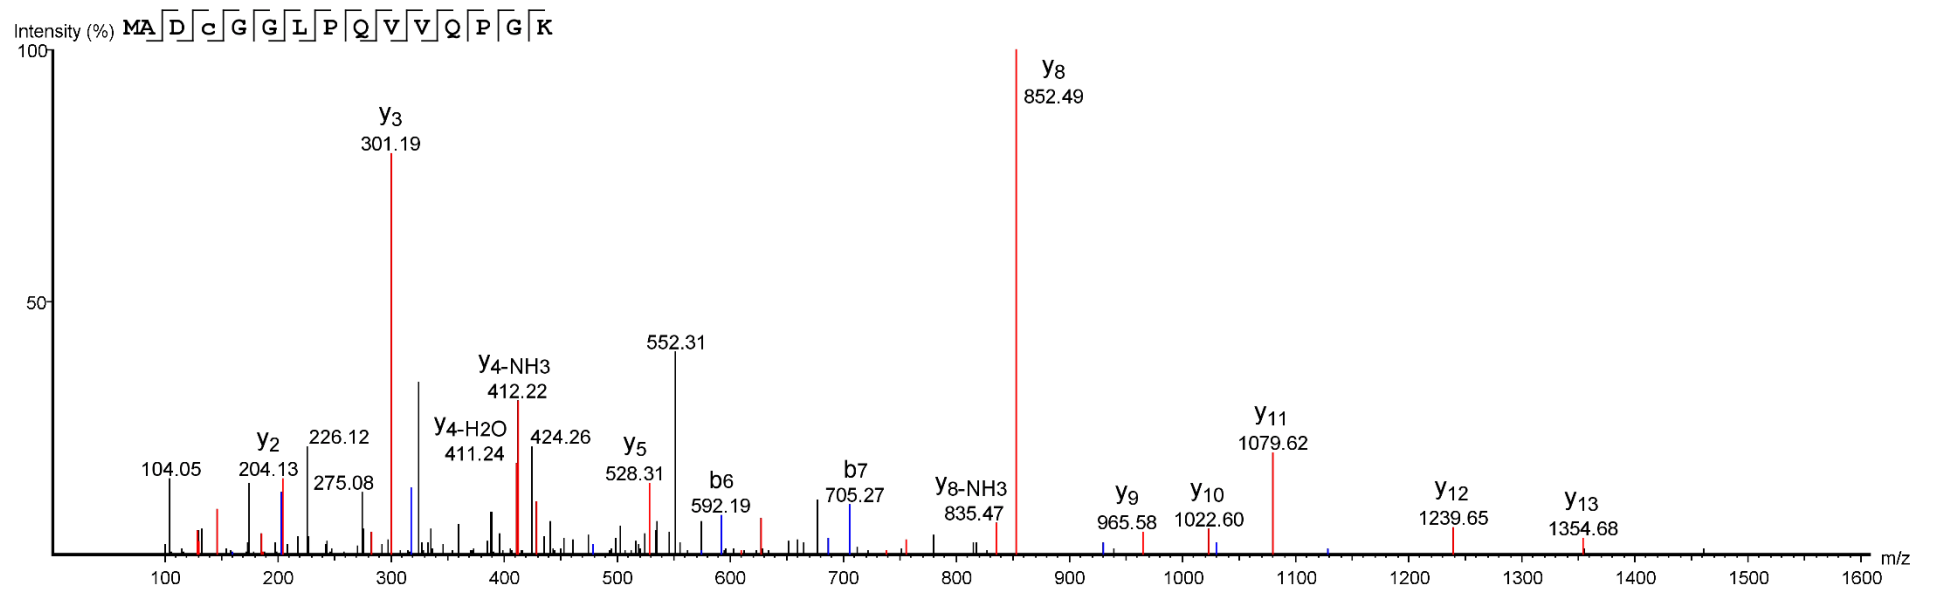

Pep11

Scan #11045

A-208: NDRG3<sub>(287-301)</sub>: M(+15.99)ADC(+57.02)GGLPQVVQPVGK

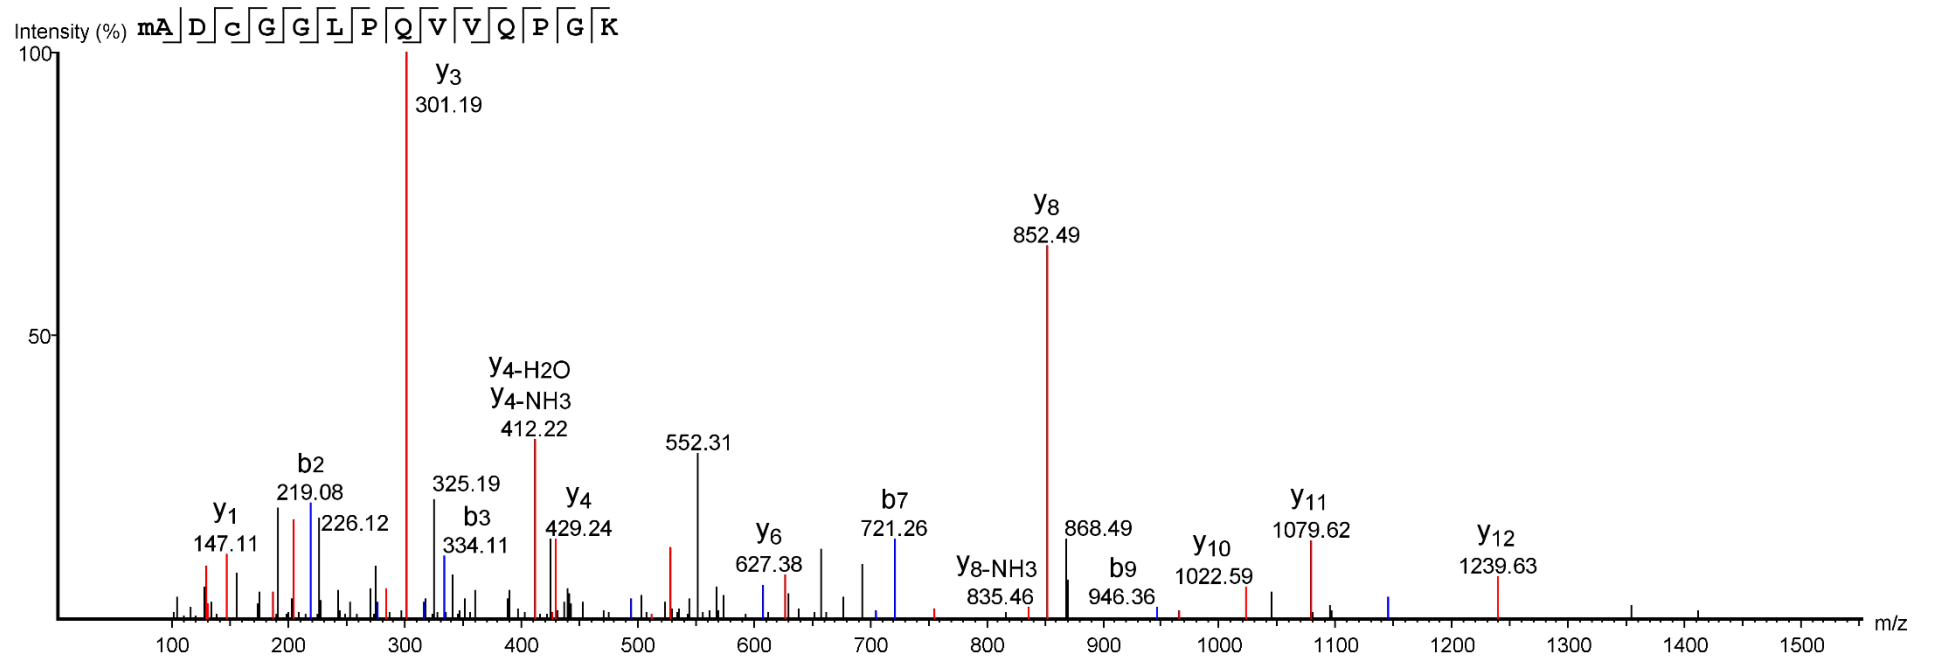

Pep11

Scan #10037

A-209: NDRG3<sub>(287-301)</sub>: MADC(+57.02)GGLP(+15.99)QVVQP<sup>G</sup>KGK

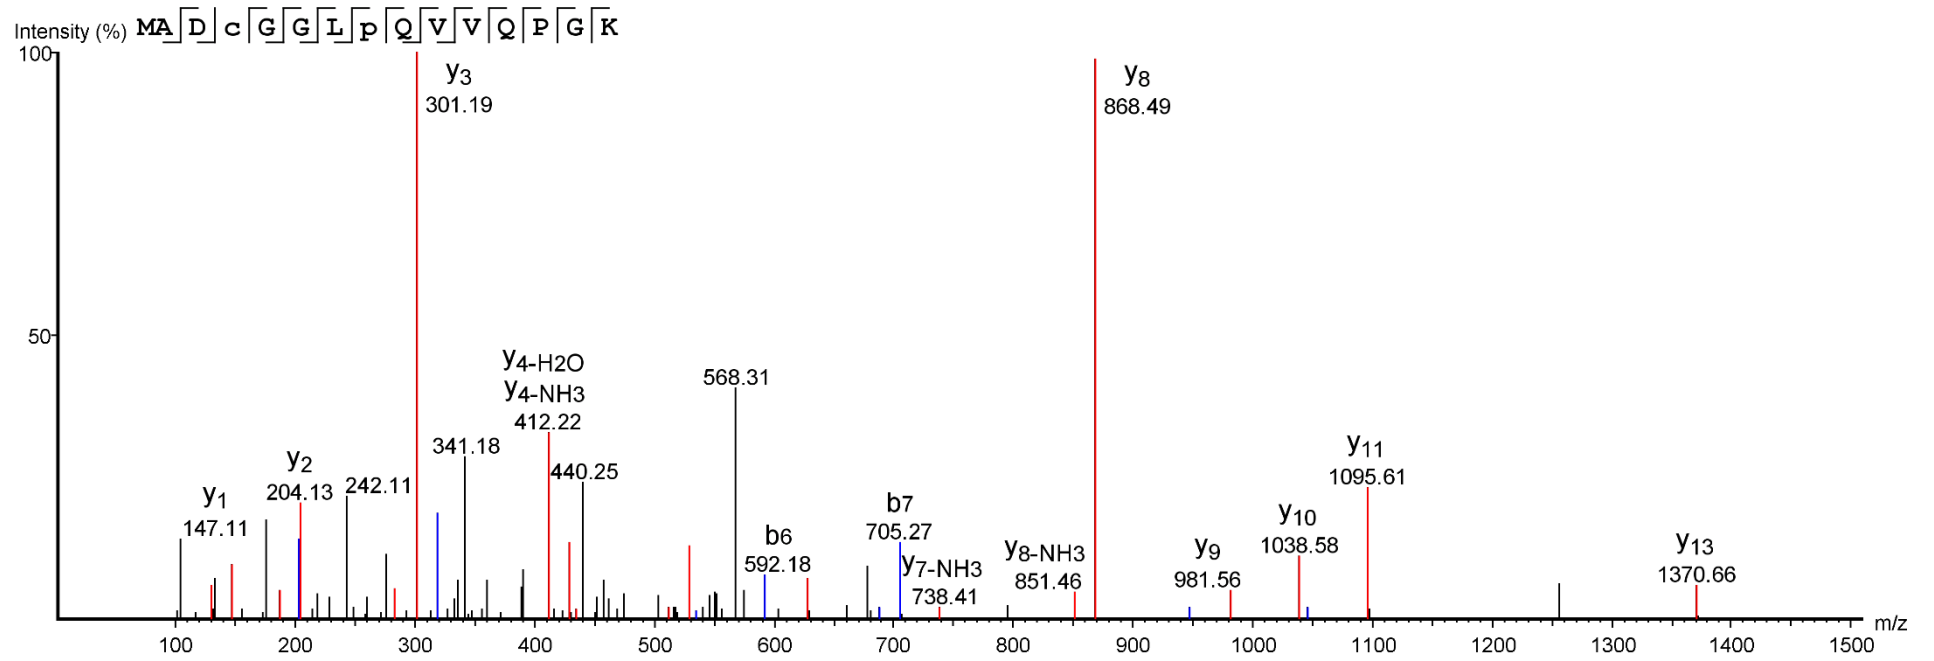

Pep11

Scan #9733

A-210: NDRG3<sub>(287-301)</sub>: M(+15.99)ADC(+57.02)GGLP(+15.99)QVVQP GK

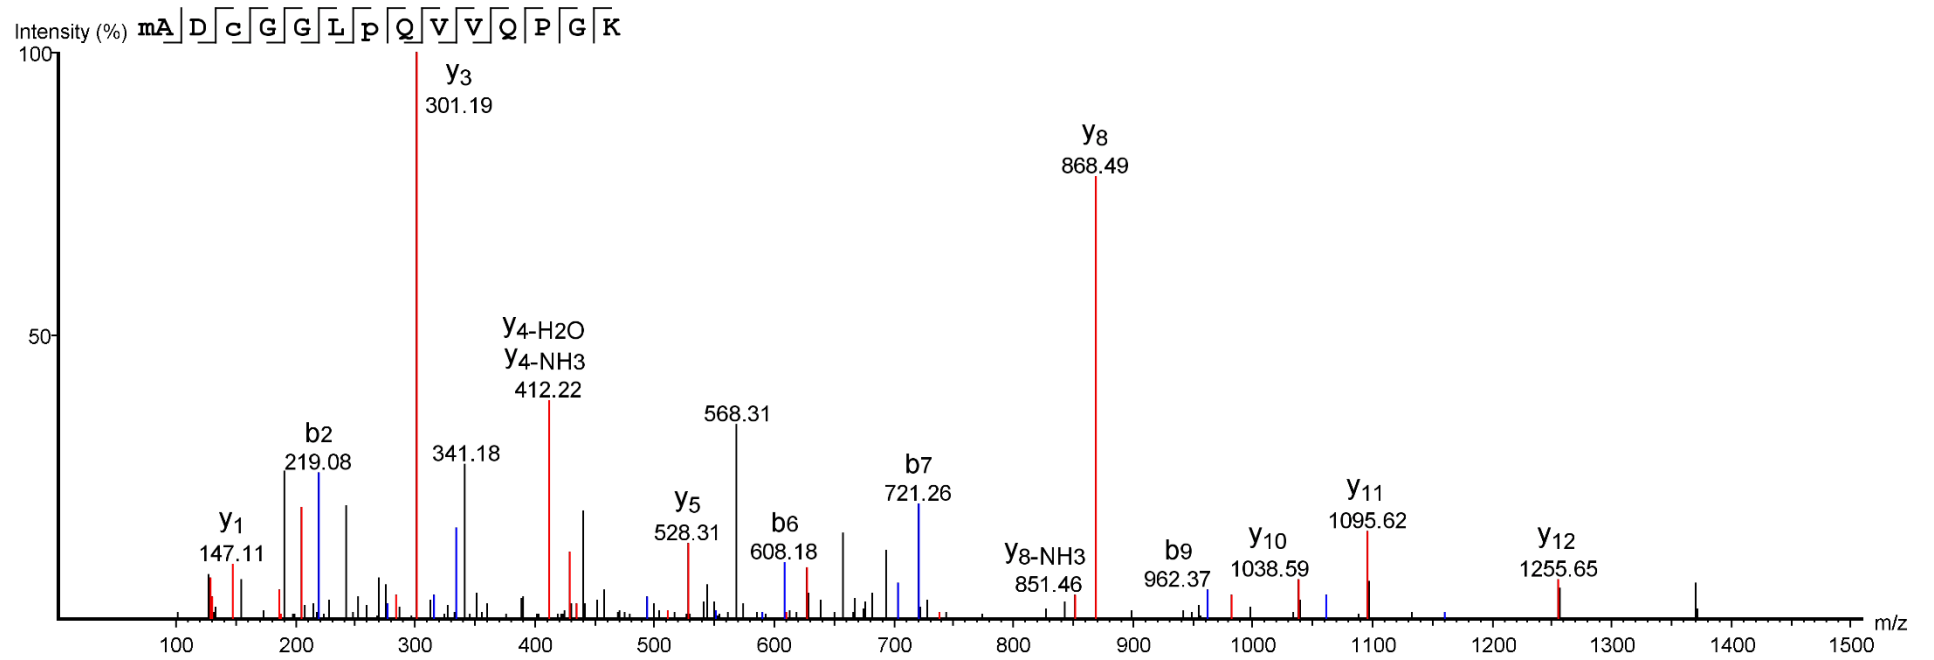

Pep11

Scan #8646

A-211: NDRG3<sub>(287-301)</sub>: MADC(+57.02)GGLPQVVQPGK

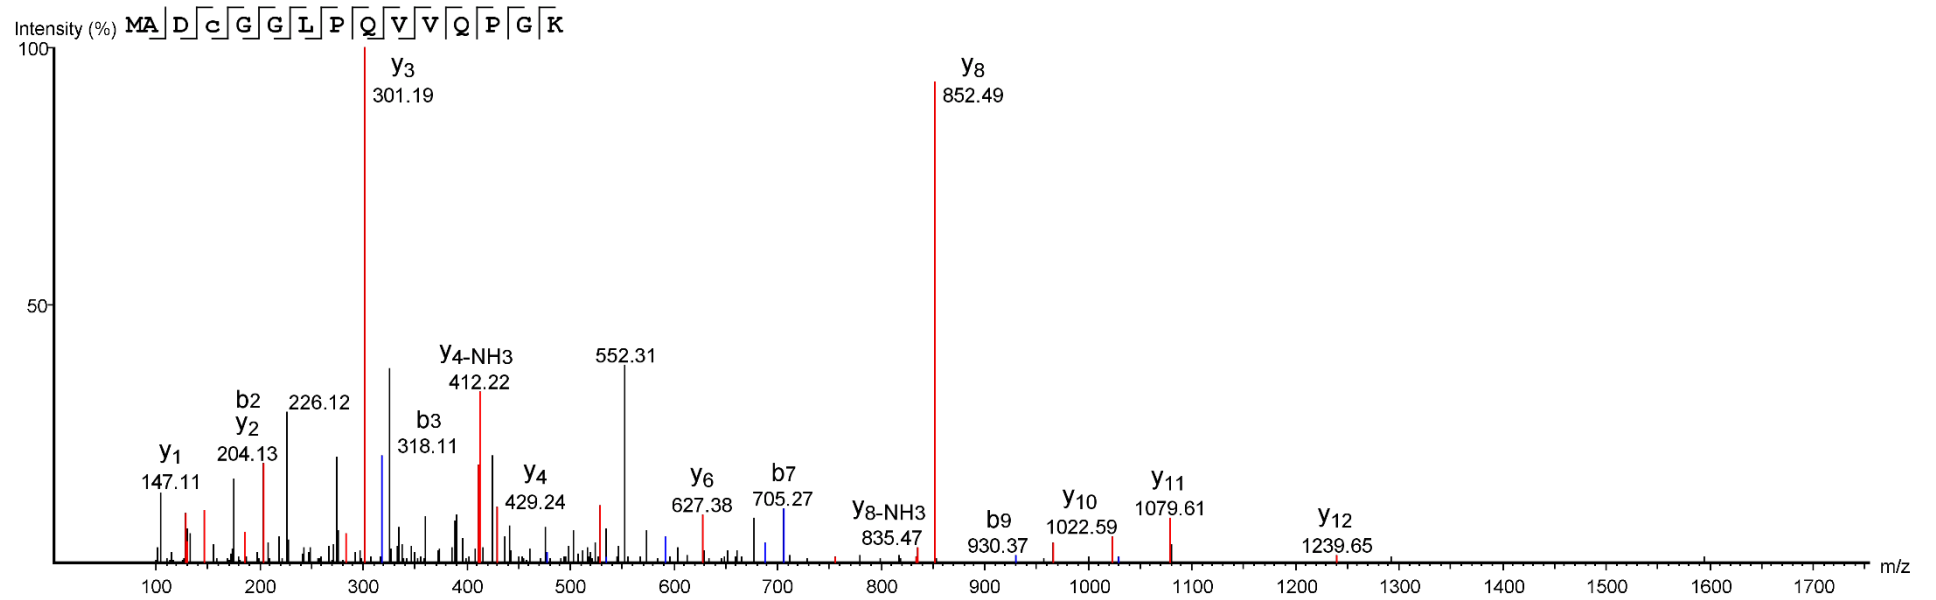

YMT23

Scan #11180

A-212: NDRG3<sub>(287-301)</sub>: MADC(+57.02)GGLPQVVQPGK

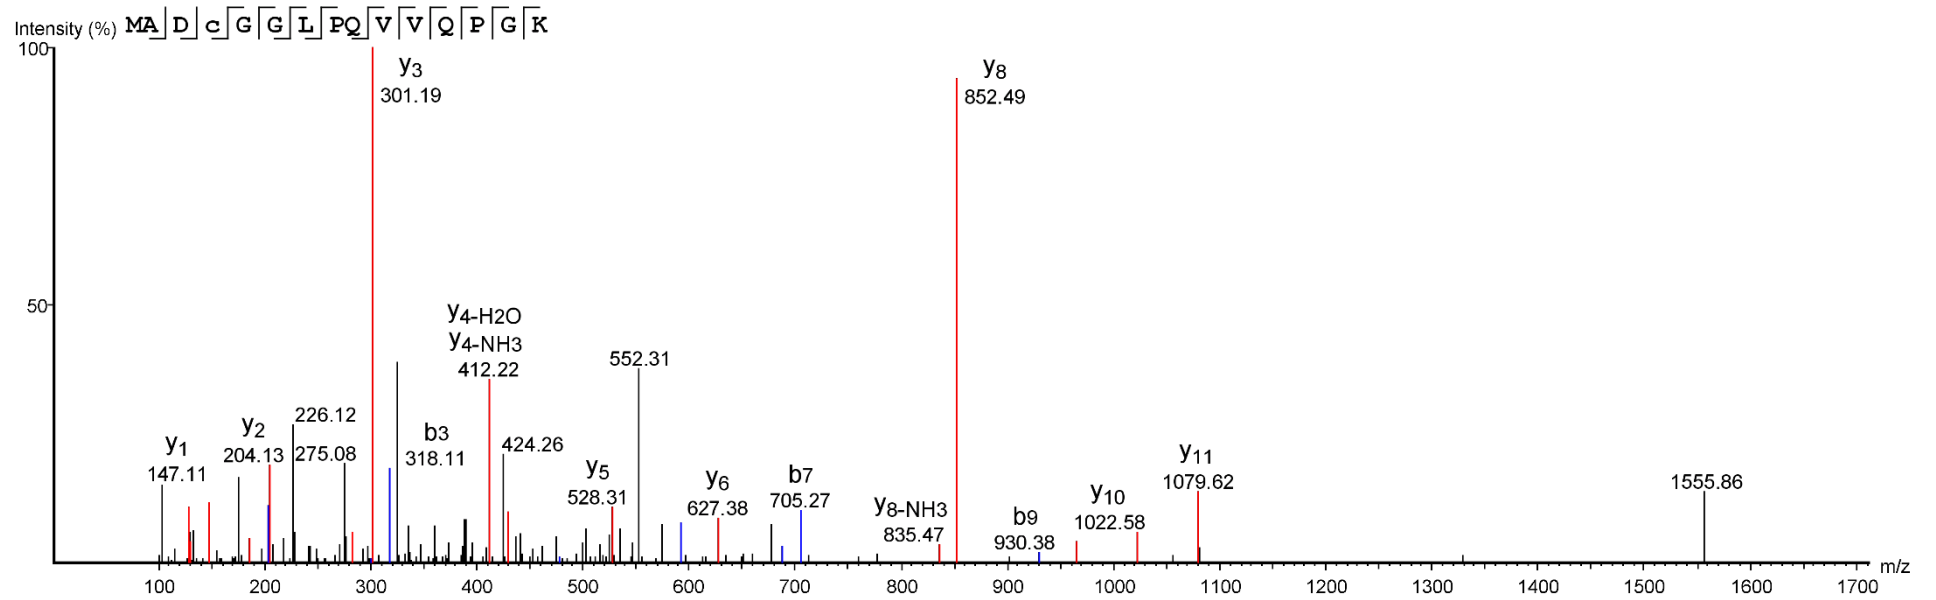

YMT24

Scan #11301

A-213: NDRG3<sub>(287-301)</sub>: M(+15.99)ADC(+57.02)GGLPQVVQPGK

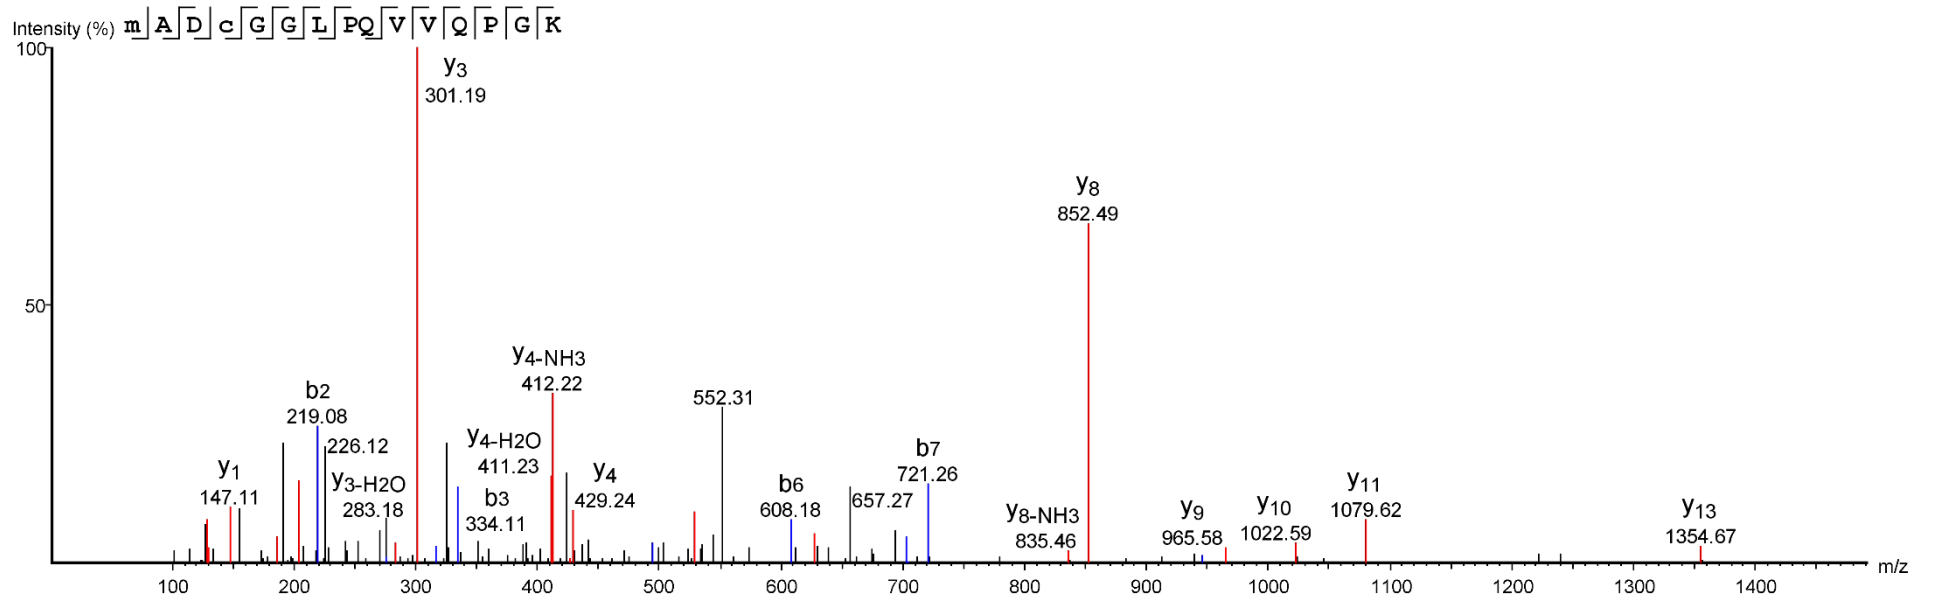

YMT23

Scan #10124

A-214: NDRG3<sub>(287-301)</sub>: M(+15.99)ADC(+57.02)GGLPQVVQPGK

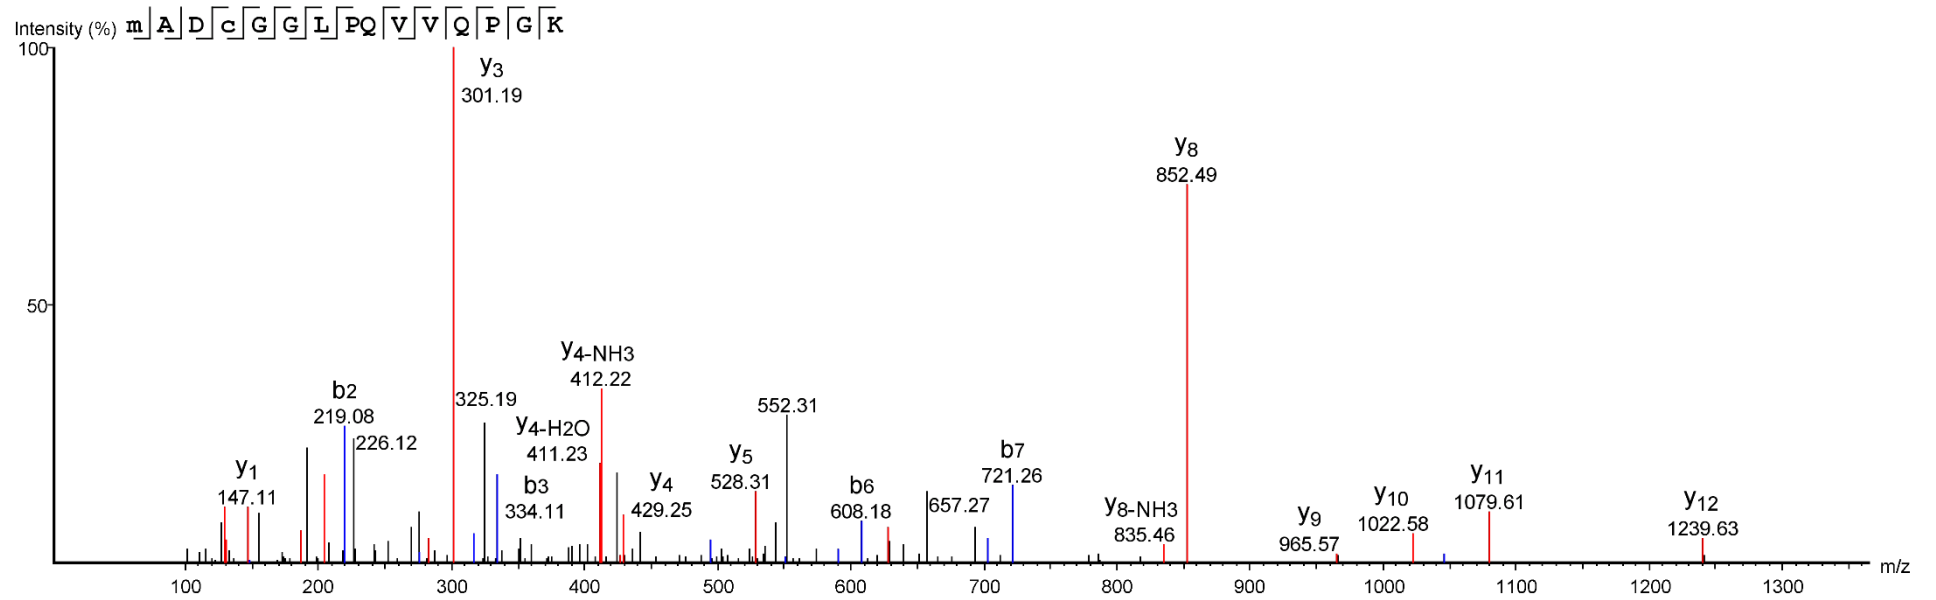

YMT24

Scan #10247



A-215: PDE4D<sub>(370-383)</sub>: LMHSSSLTNSSIPR+

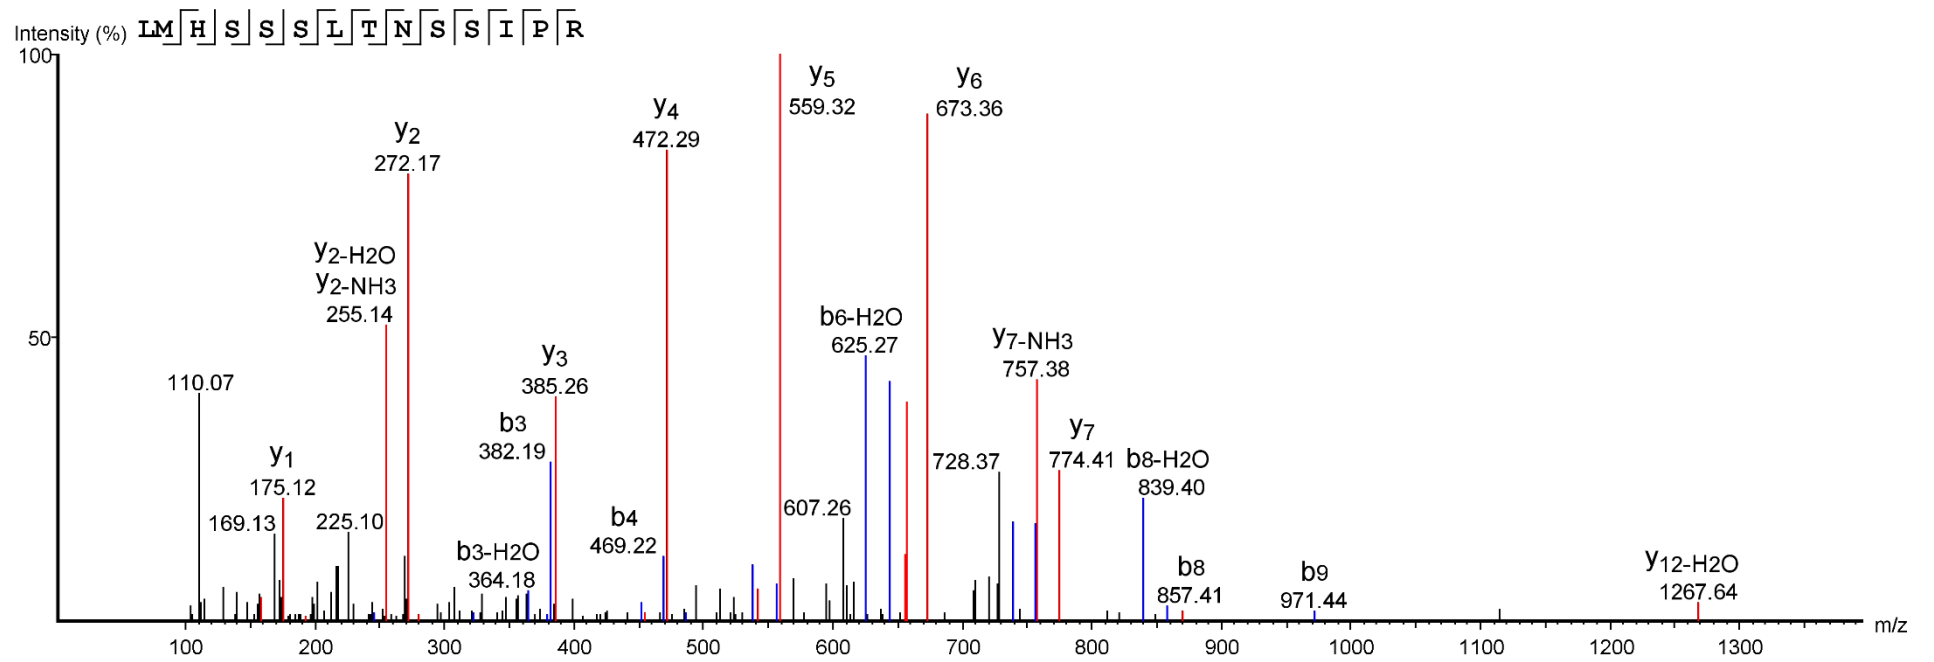

Pep11  
Scan #7494

A-216: PDE4D<sub>(370-383)</sub>: LM(+15.99)HSSSLTNSSIPR+

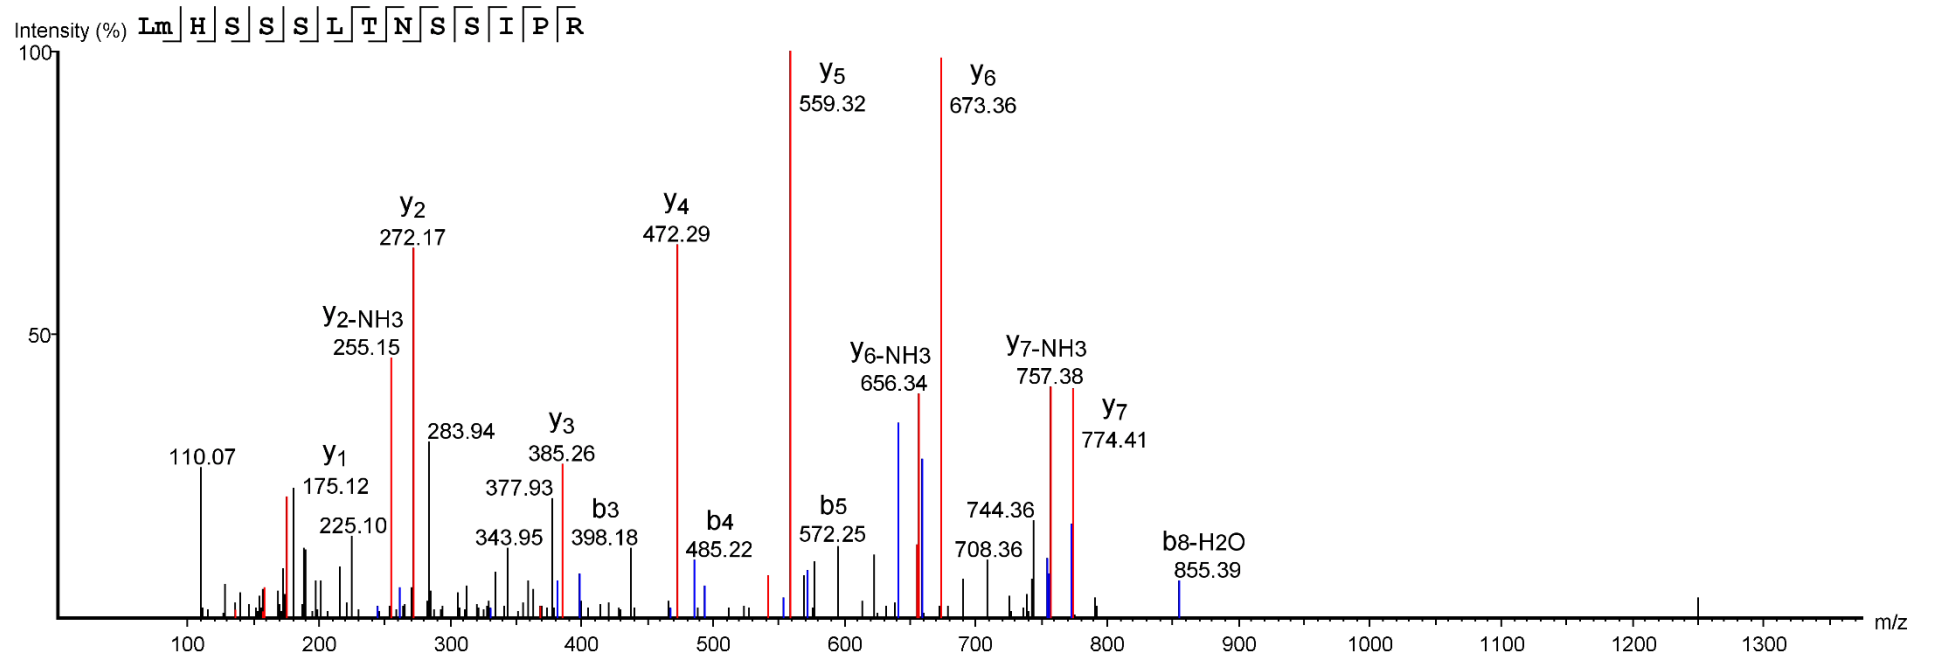

Pep11

Scan #6294

A-217: PDE4D<sub>(370-383)</sub>: LMHSSSLTNSSIP(+15.99)R+

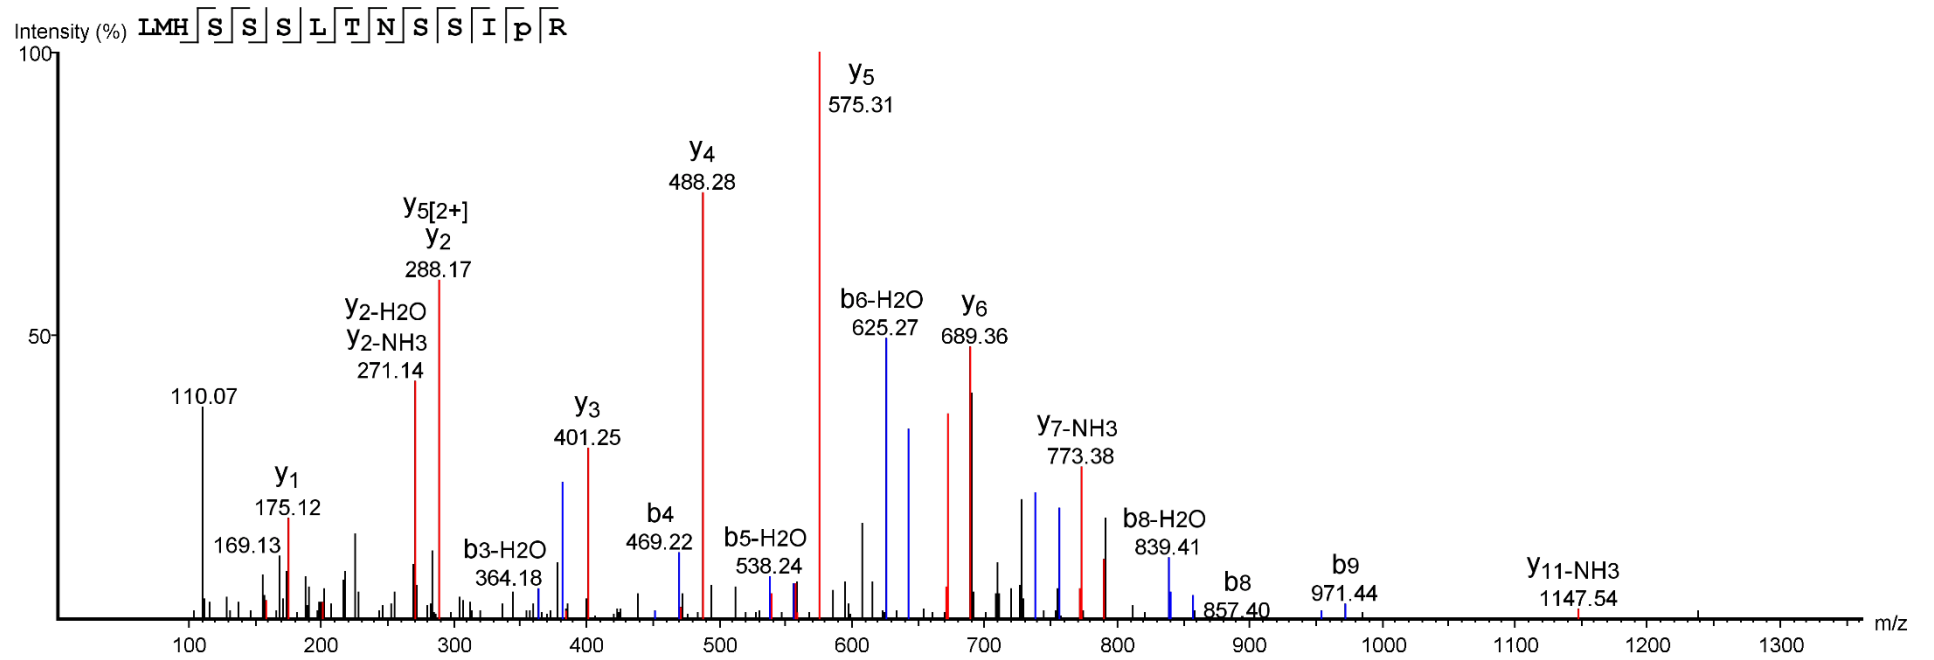

Pep11  
Scan #7113

A-218: PDE4D<sub>(370-383)</sub>: LM(+15.99)HSSSLTNSSIP(+15.99)R+

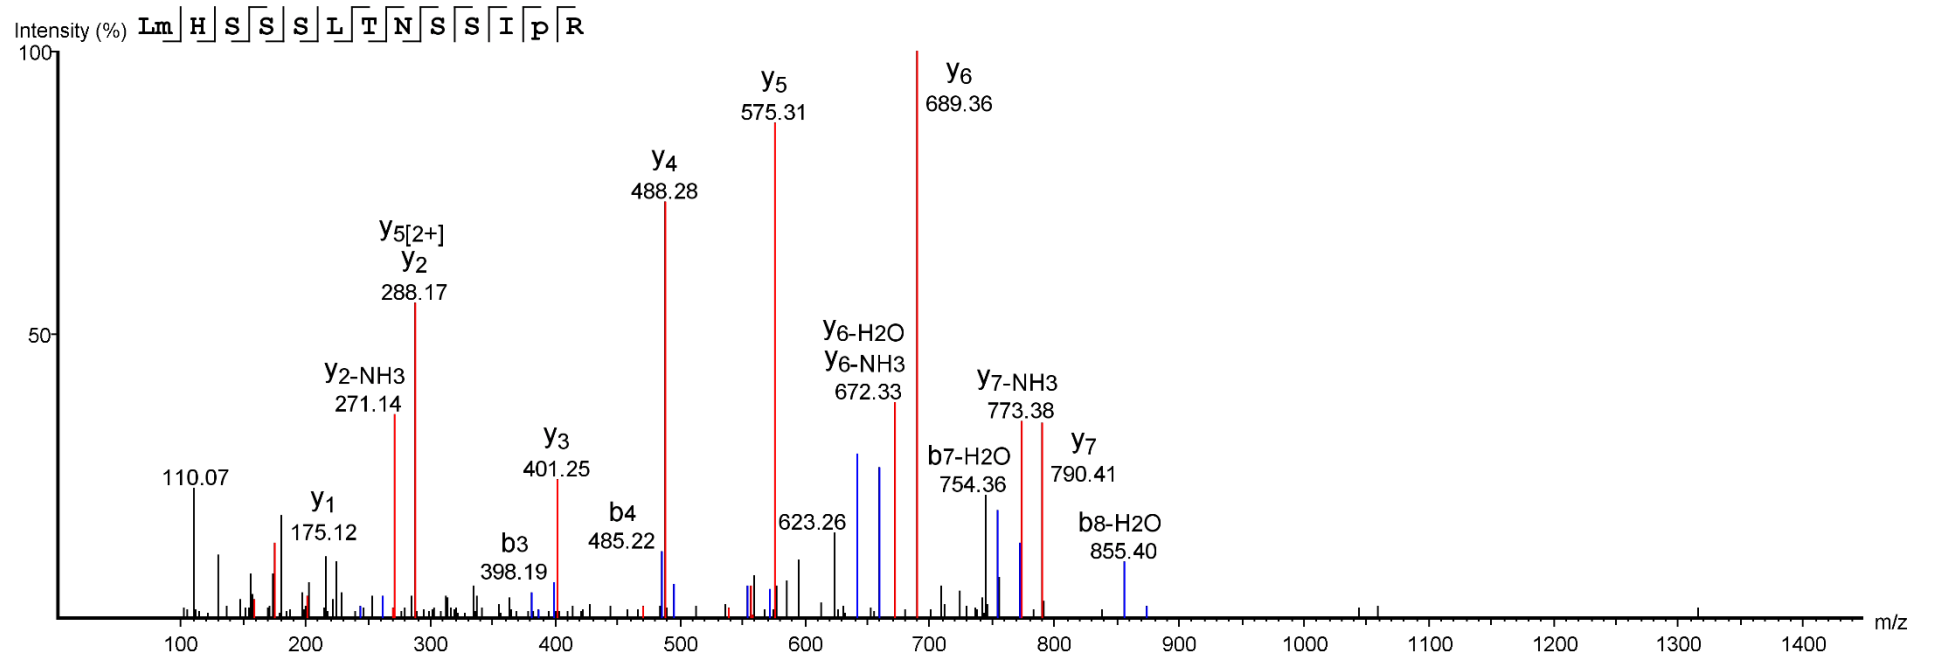

Pep11  
Scan #5700

A-219: PDE4D<sub>(370-383)</sub>: LMHSSSLTNSSIPR<sup>+</sup>

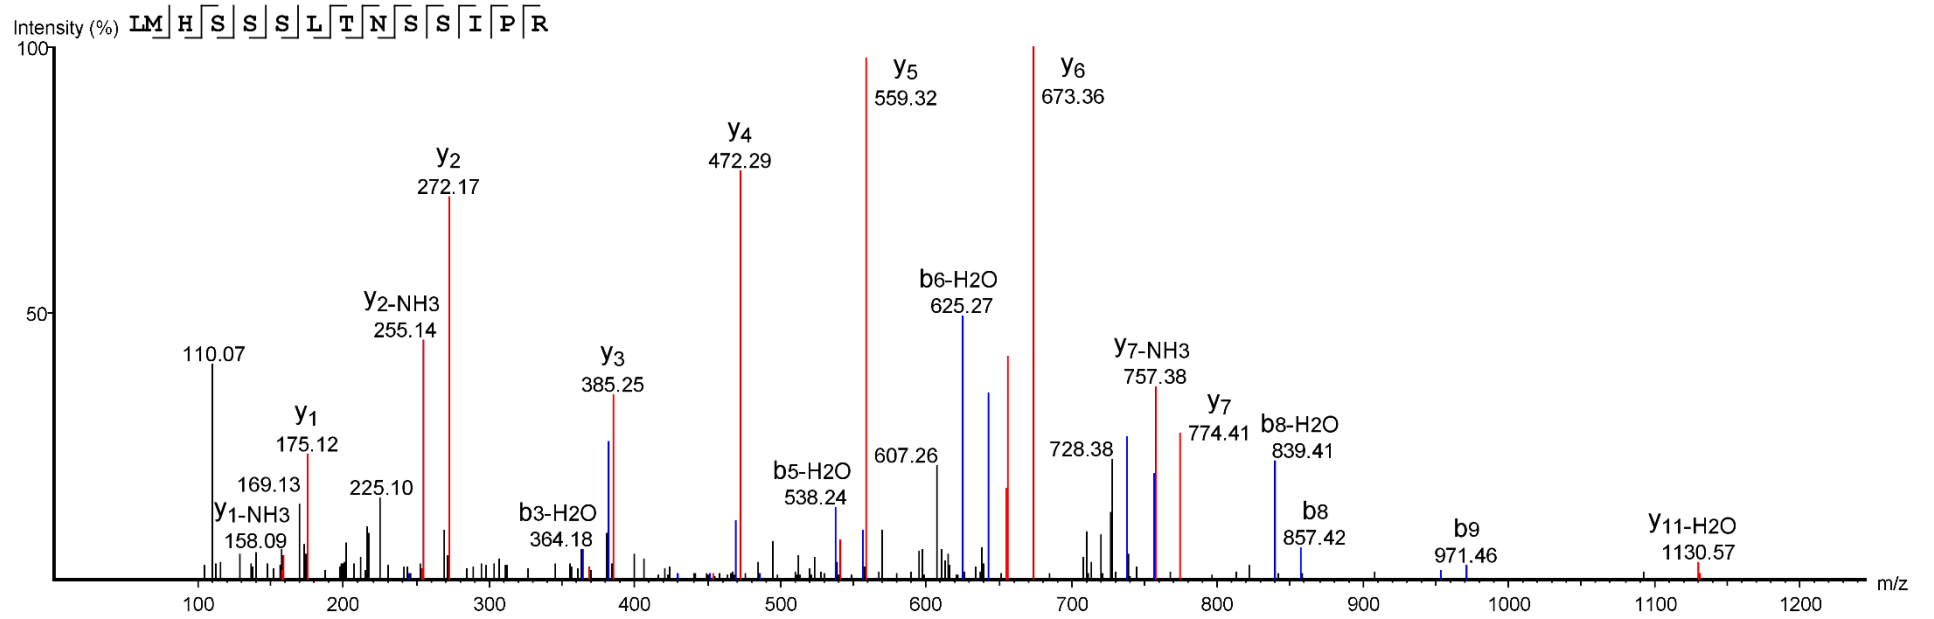

YMT69

Scan #7231

A-220: PDE4D<sub>(370-383)</sub>: LMHSSSLTNSSIPR+

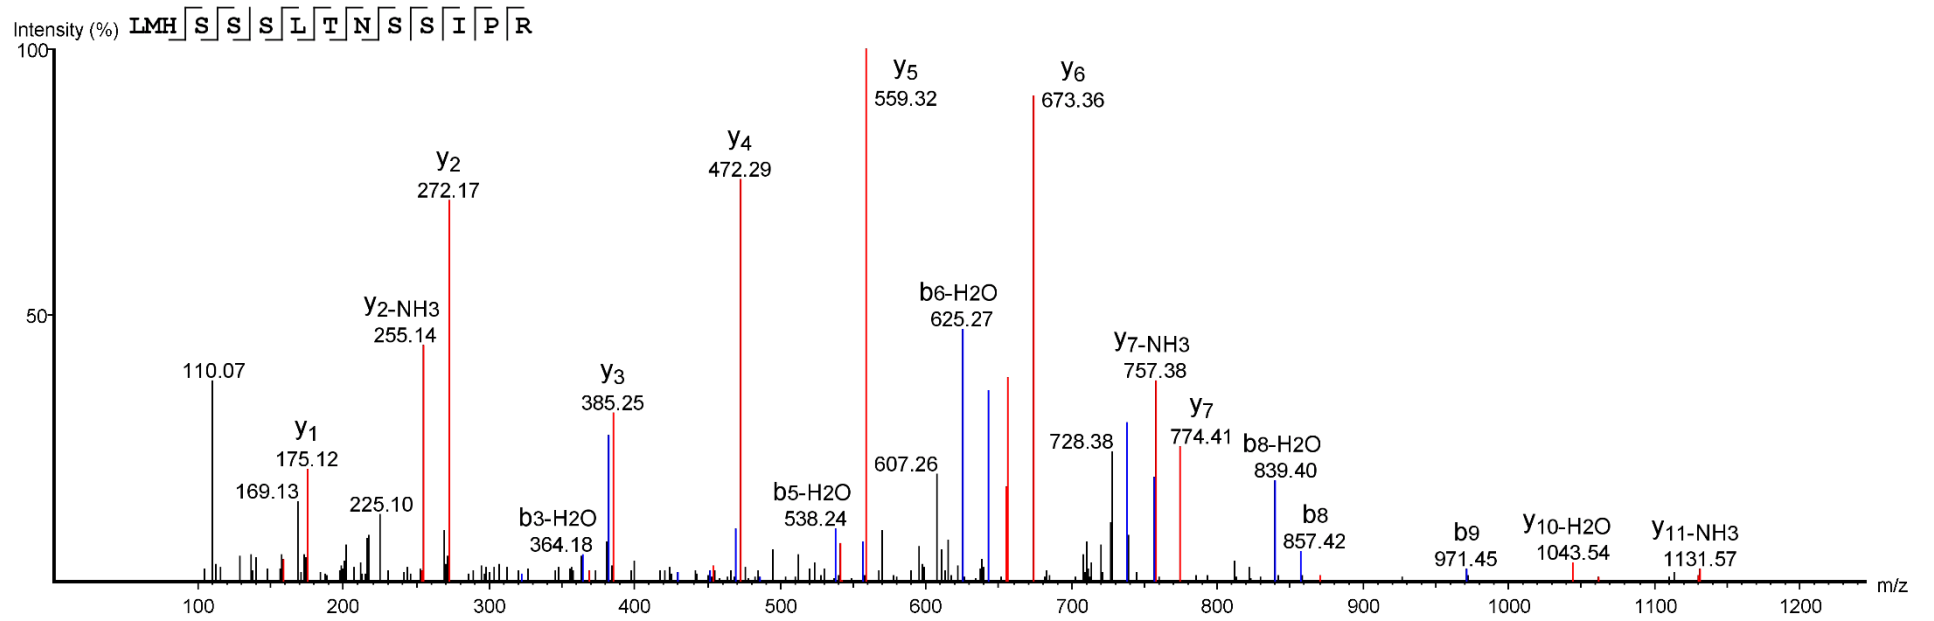

YMT70

Scan #7209

A-221: PDE4D<sub>(370-383)</sub>: LMHSSSLTNSSIPR+

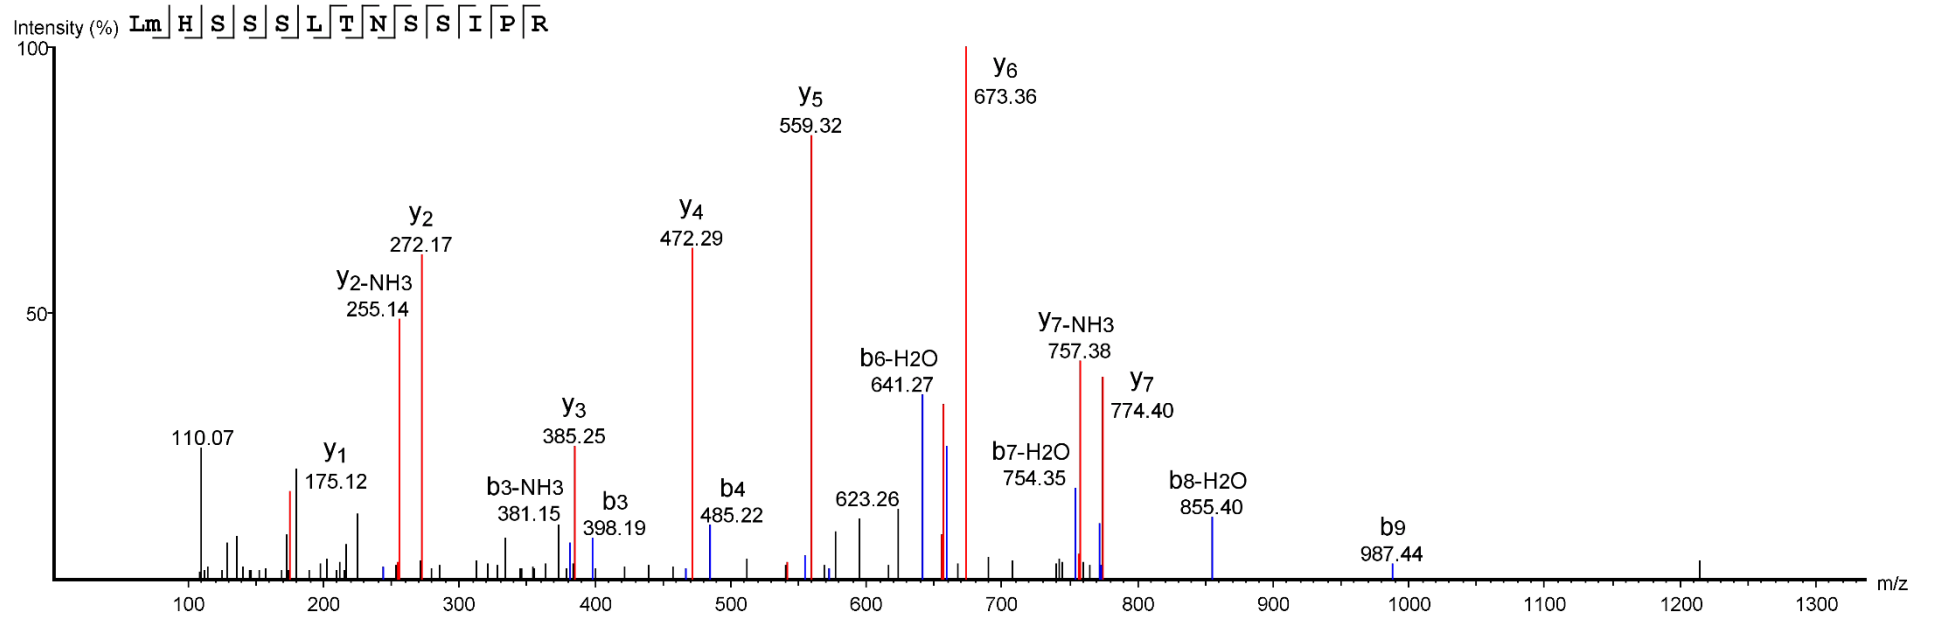

YMT69

Scan #6204

A-222: PDE4D<sub>(370-383)</sub>: LMHSSSLTNSSIPR+

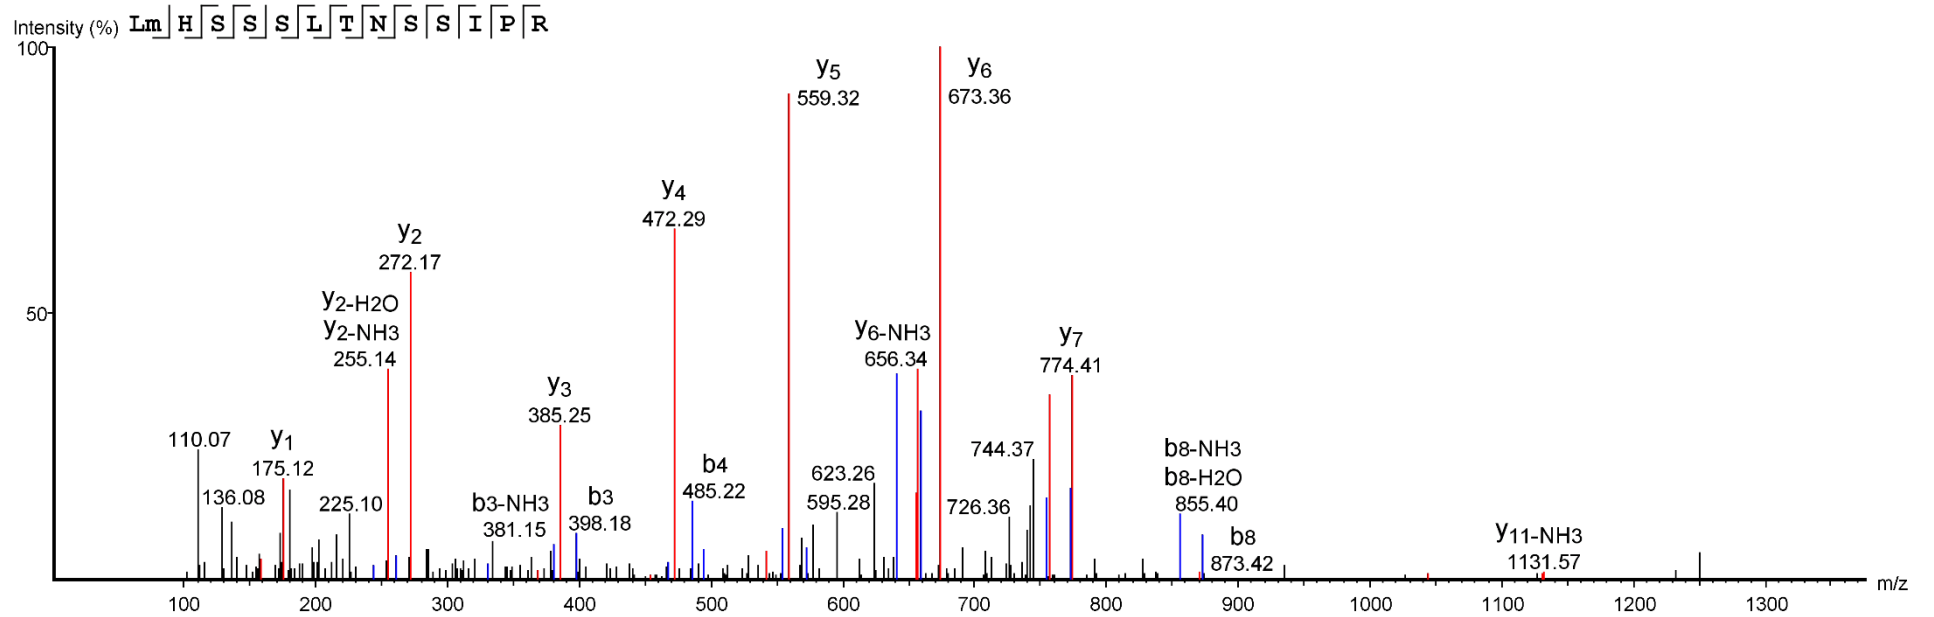

YMT70

Scan #6073



A-223: PDE4D<sub>(411-431)</sub>: IAELSGNRPLTVIMHTIFQER

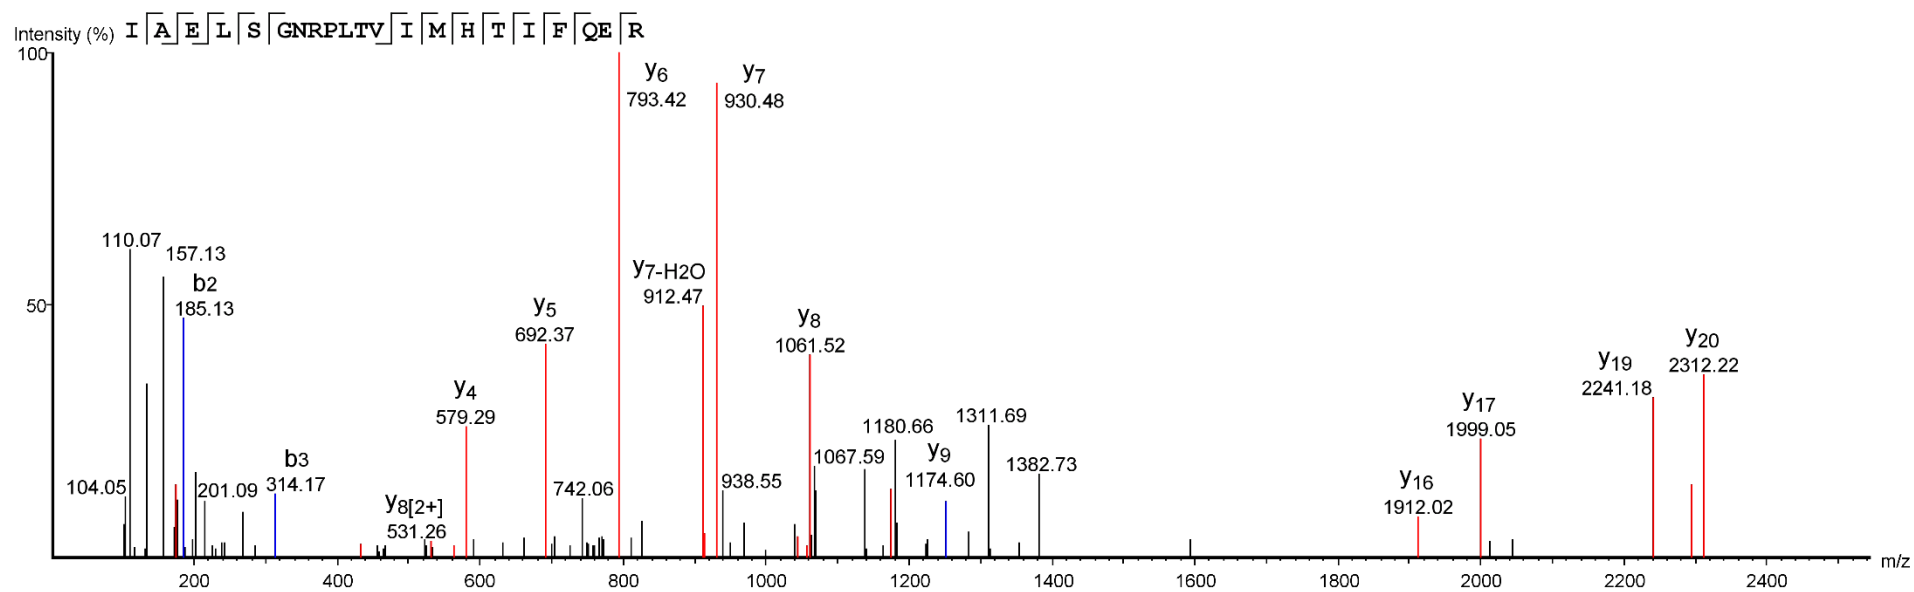

Pep17  
Scan  
#17727

A-224: PDE4D<sub>(411-431)</sub>: IAELSGNRP(+15.99)LTVIMHTIFQER

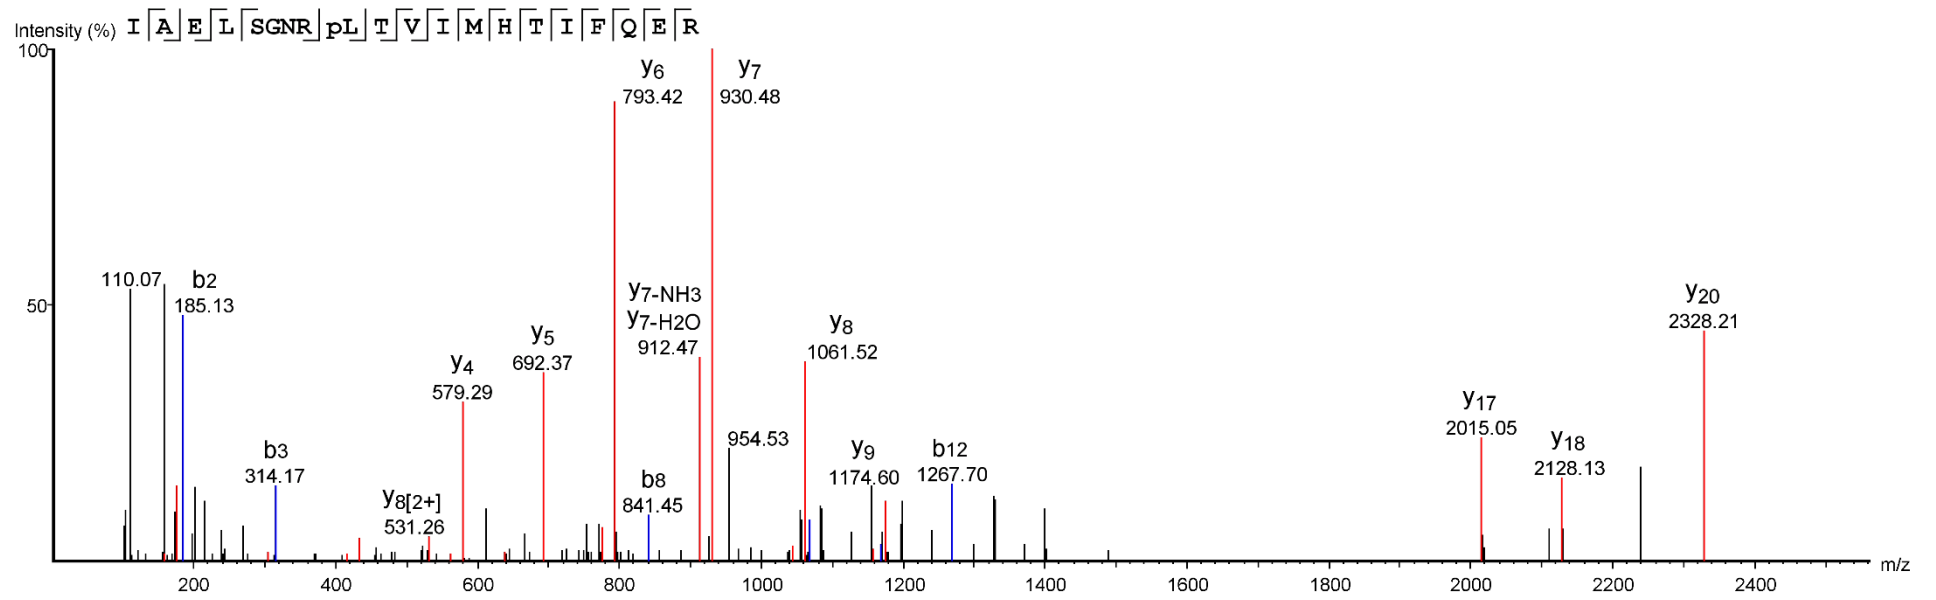

Pep17  
Scan  
#16768

A-225: PDE4D<sub>(411-431)</sub>: IAELSGNRPLTVIM(+15.99)HTIFOER

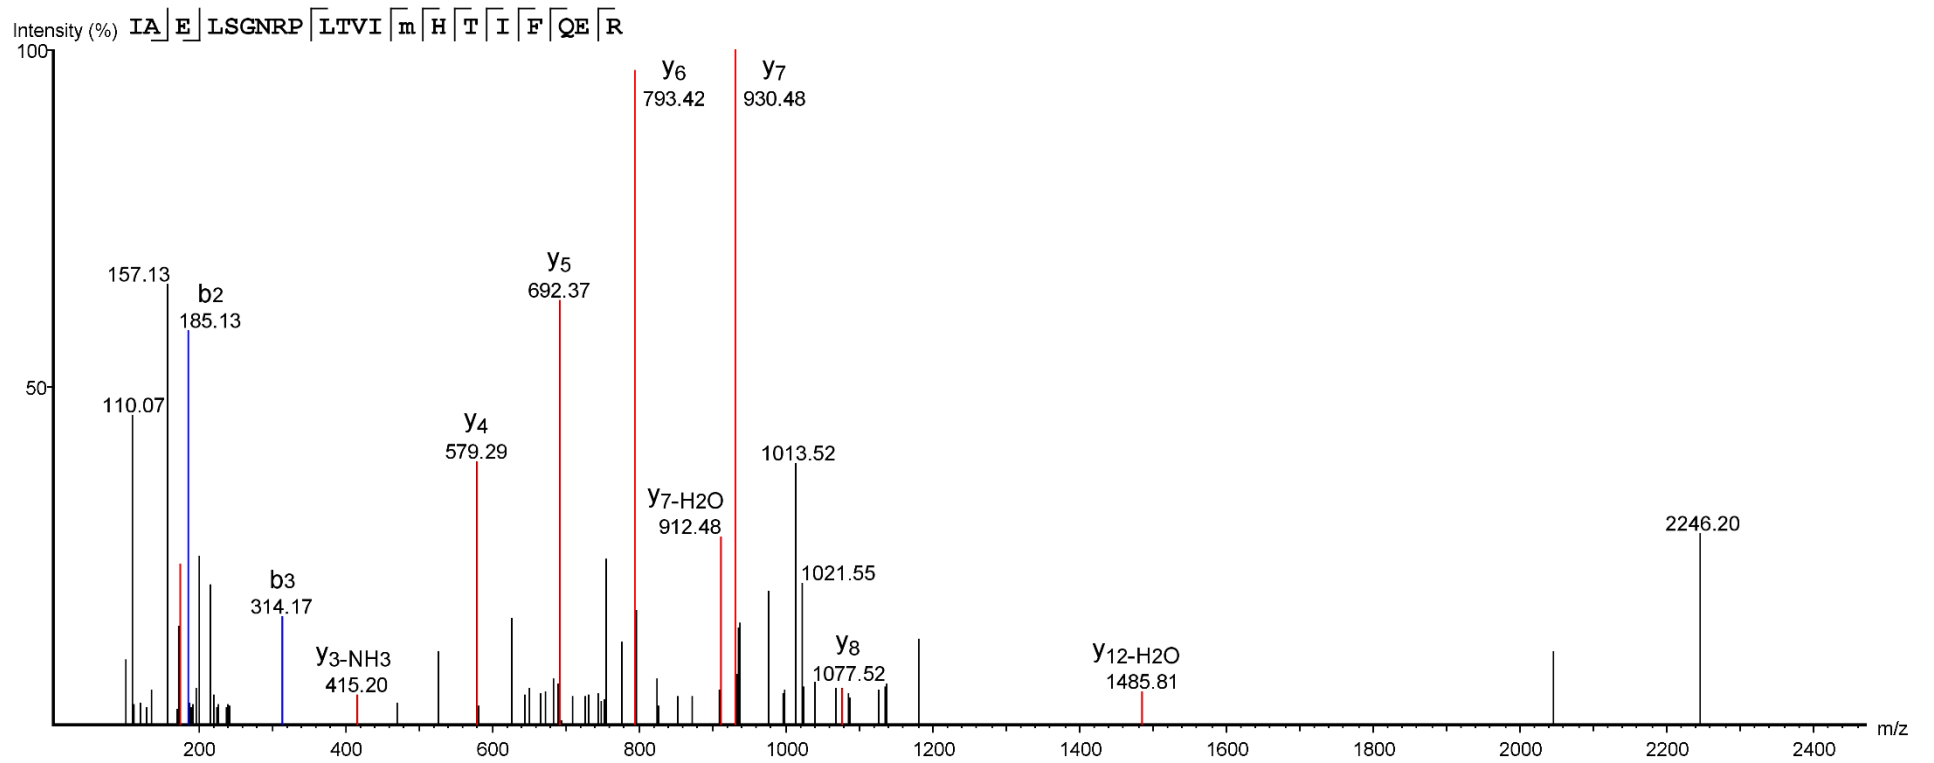

Pep17  
Scan  
#14357

A-226: PDE4D<sub>(411-431)</sub>: IAELSGNRP(+15.99)LTVIM(+15.99)HTIFQER

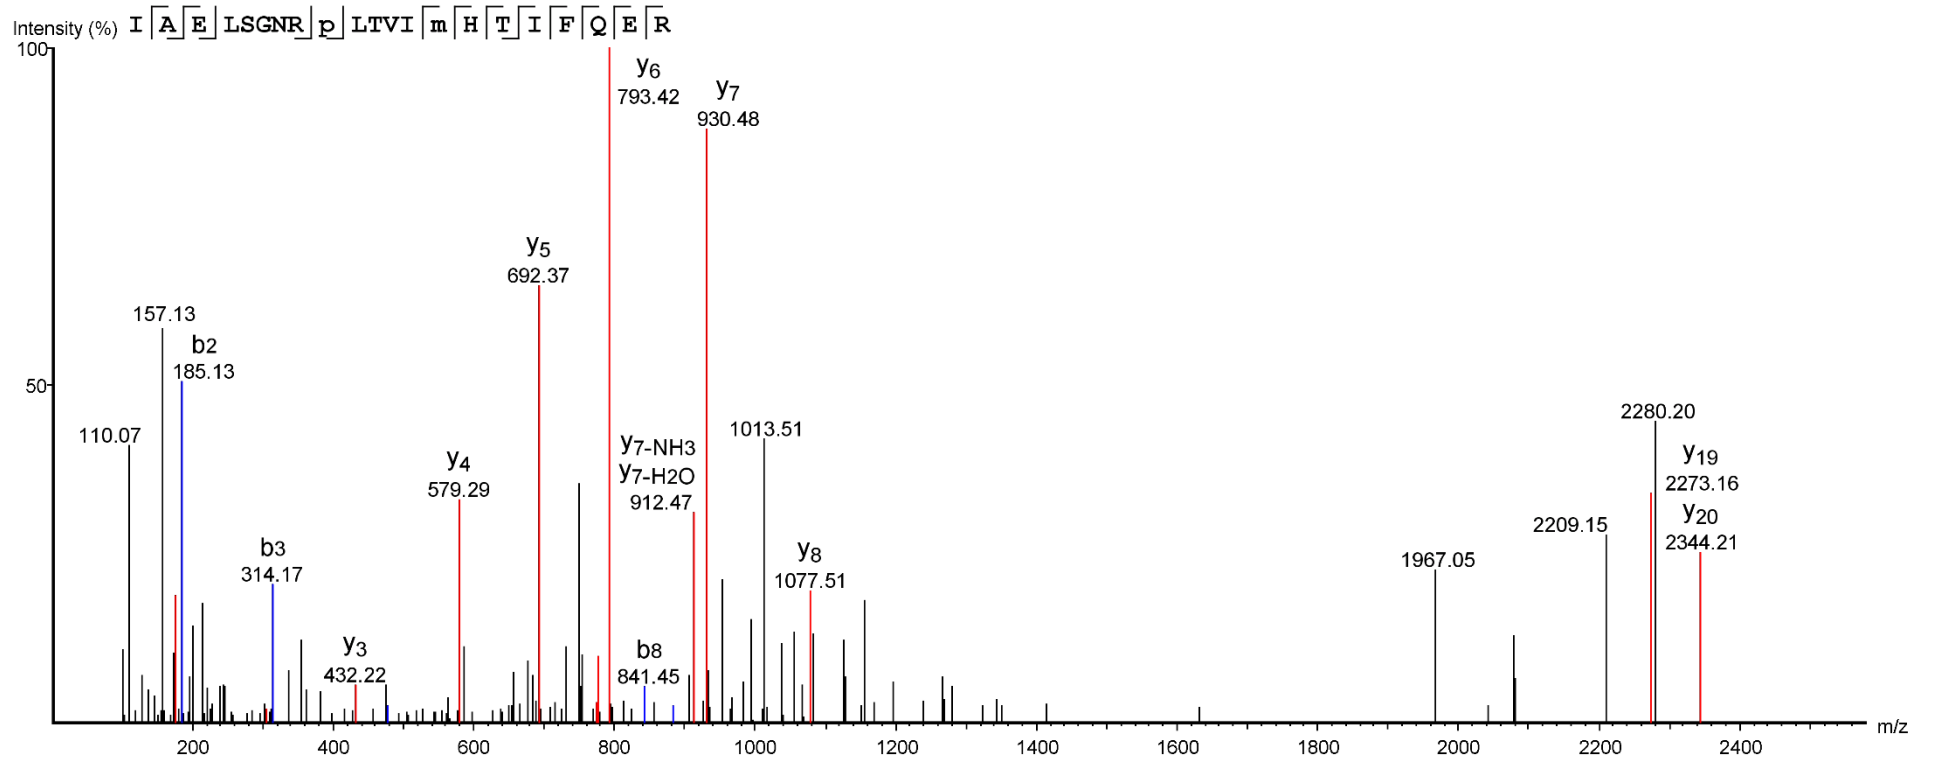

Pep17  
Scan  
#12980

A-227: PDE4D<sub>(411-431)</sub>: IAELSGNRPLTVIMHTIFQER

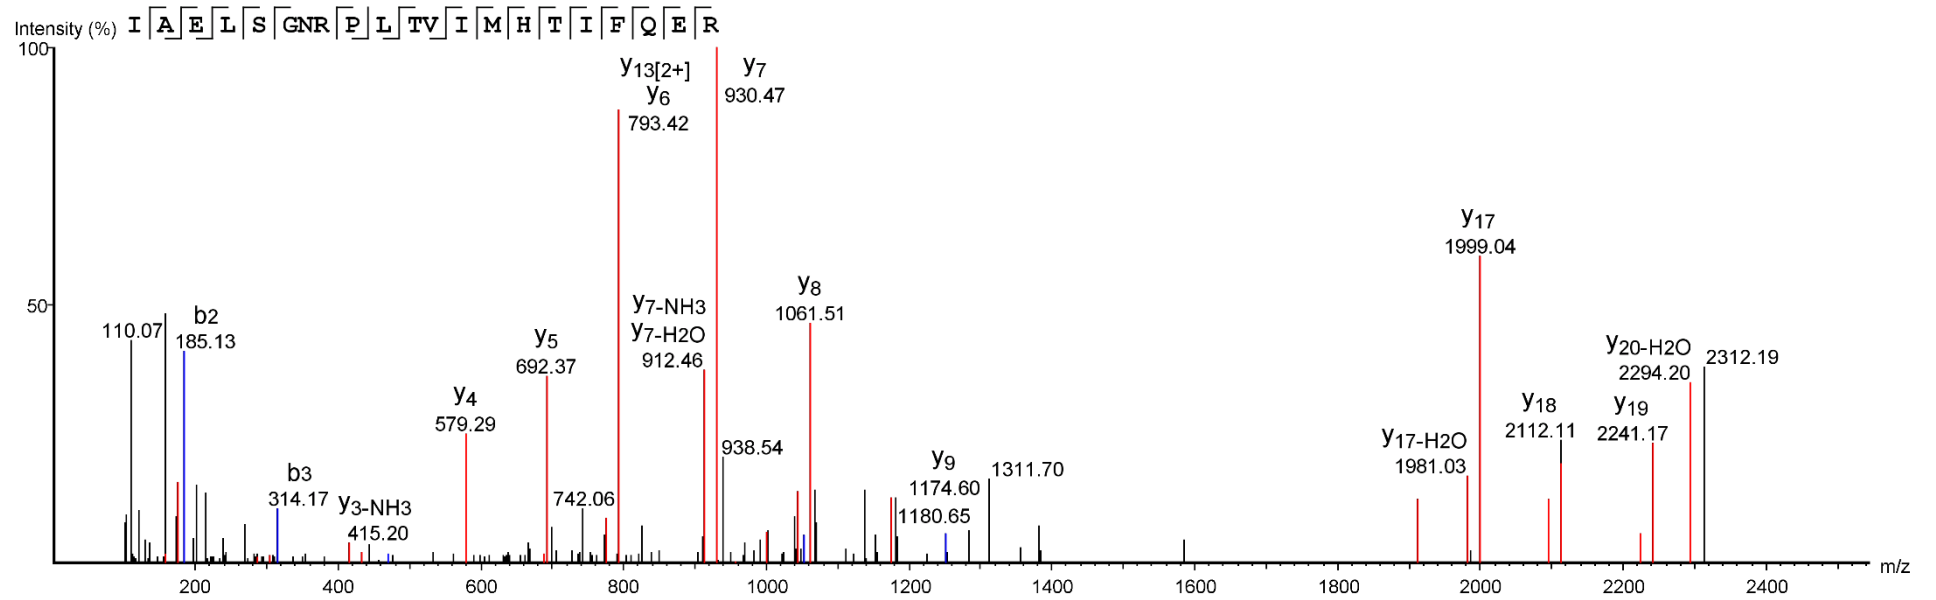

YMT69

Scan

#19407

A-228: PDE4D<sub>(411-431)</sub>: IAELSGNRPLTVIMHTIFQER

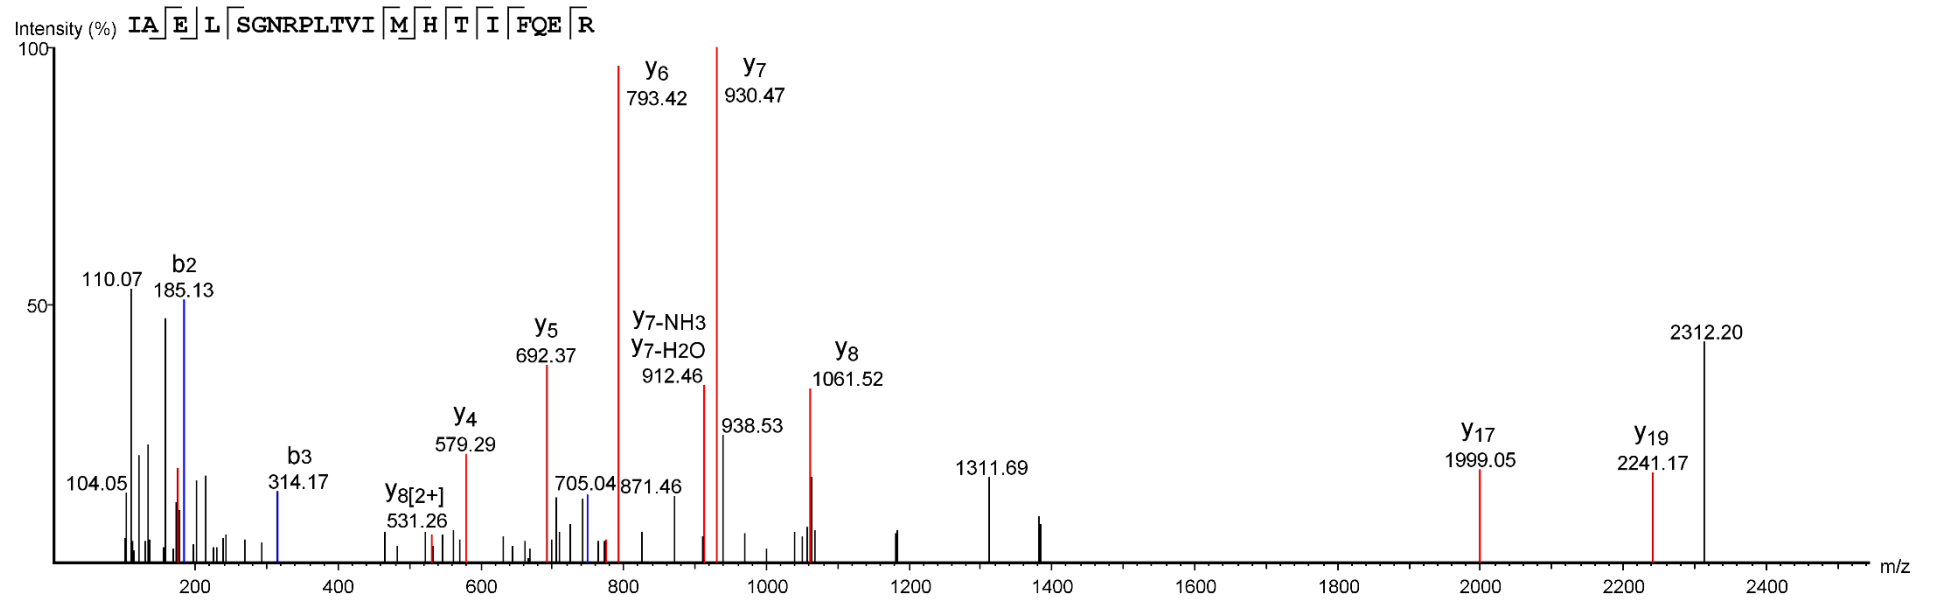

YMT70  
Scan  
#19782

A-229: PDE4D<sub>(411-431)</sub>: IAELSGNRPLTVIM(+15.99)HTIFOER

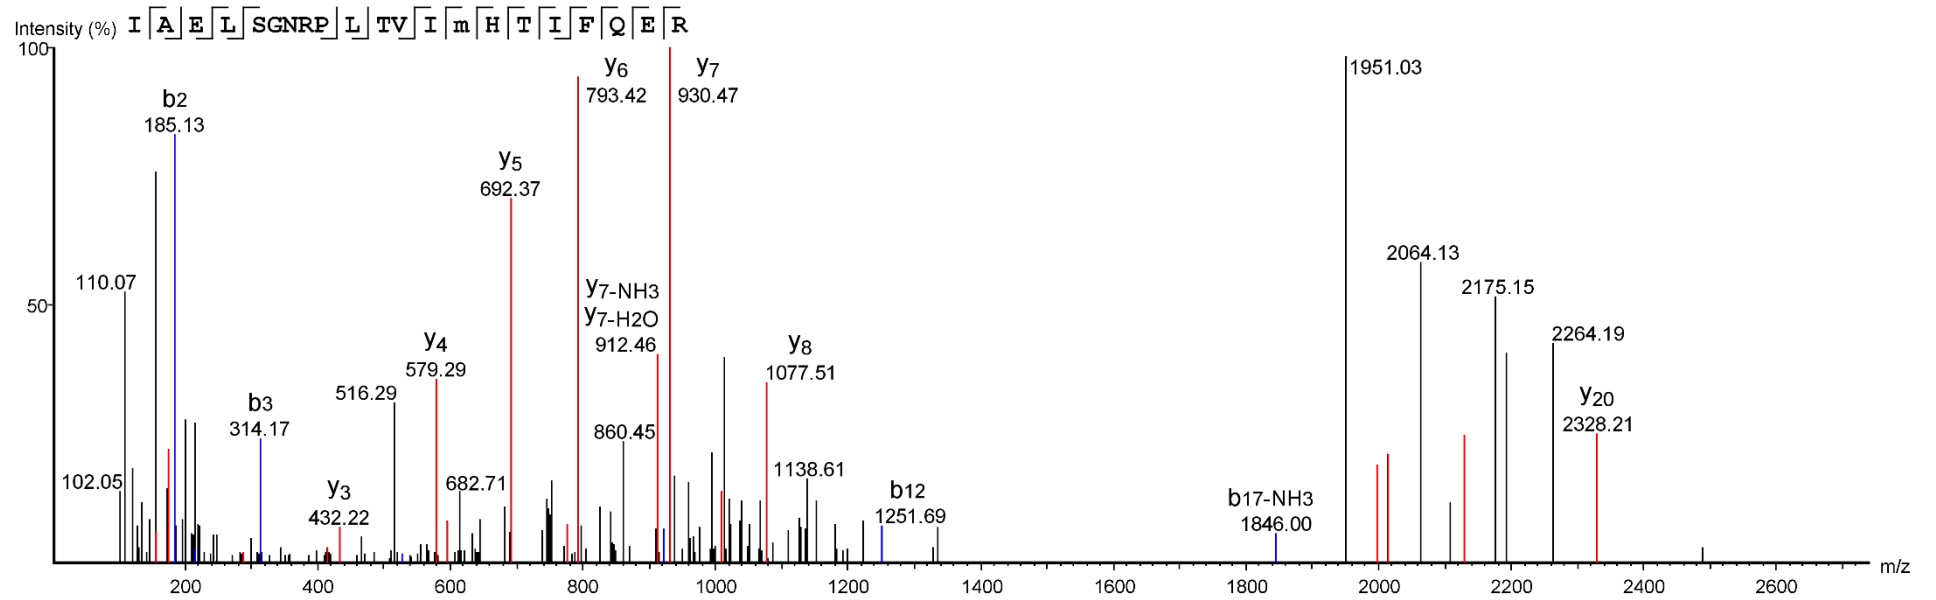

YMT69  
Scan  
#15539

A-230: PDE4D<sub>(411-431)</sub>: IAELSGNRPLTVIM(+15.99)HTIFOER

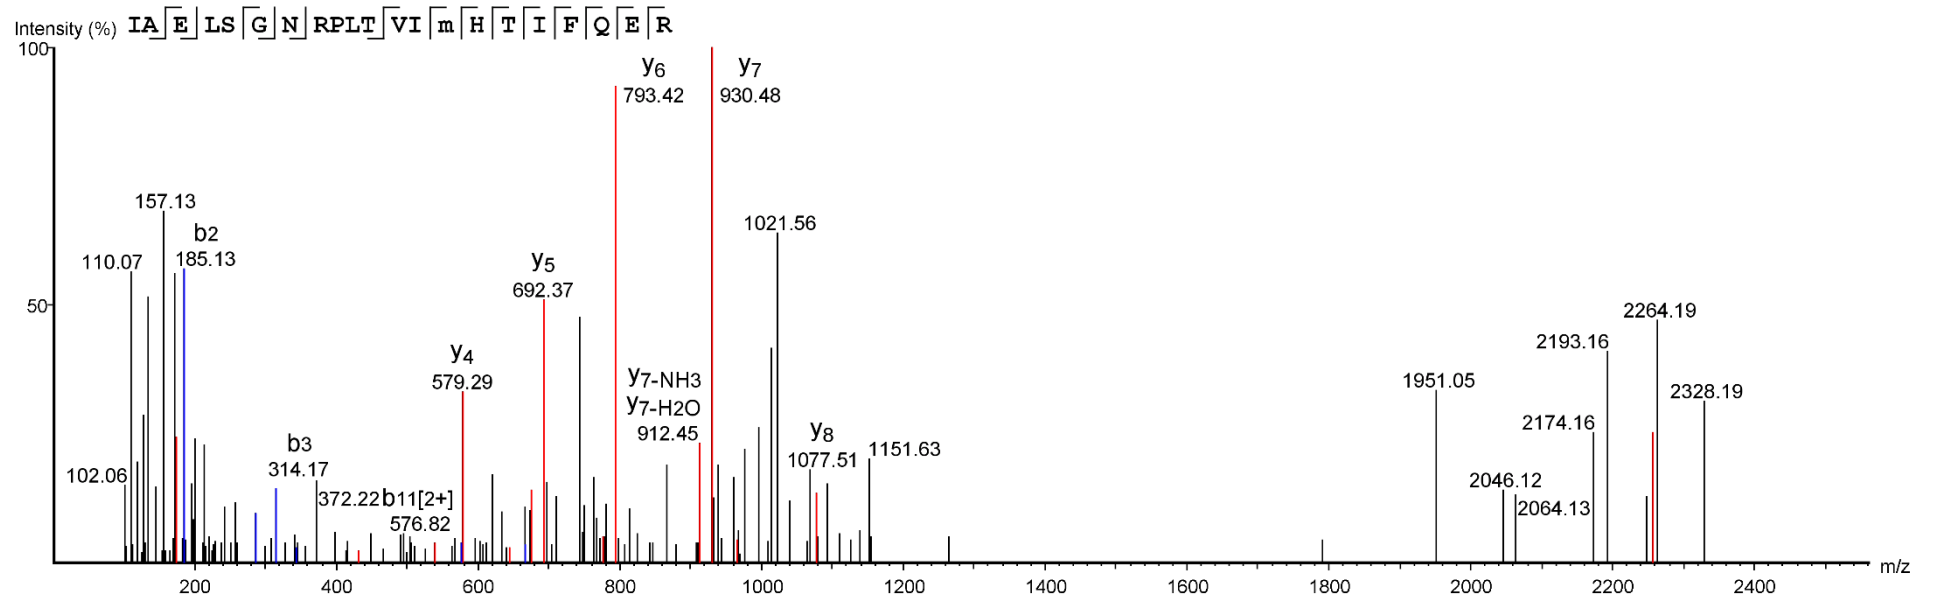

YMT70

Scan

#15807



A-231: PKM<sub>(401-422)</sub>: LAPITSDPTEATAVGAVEASFK

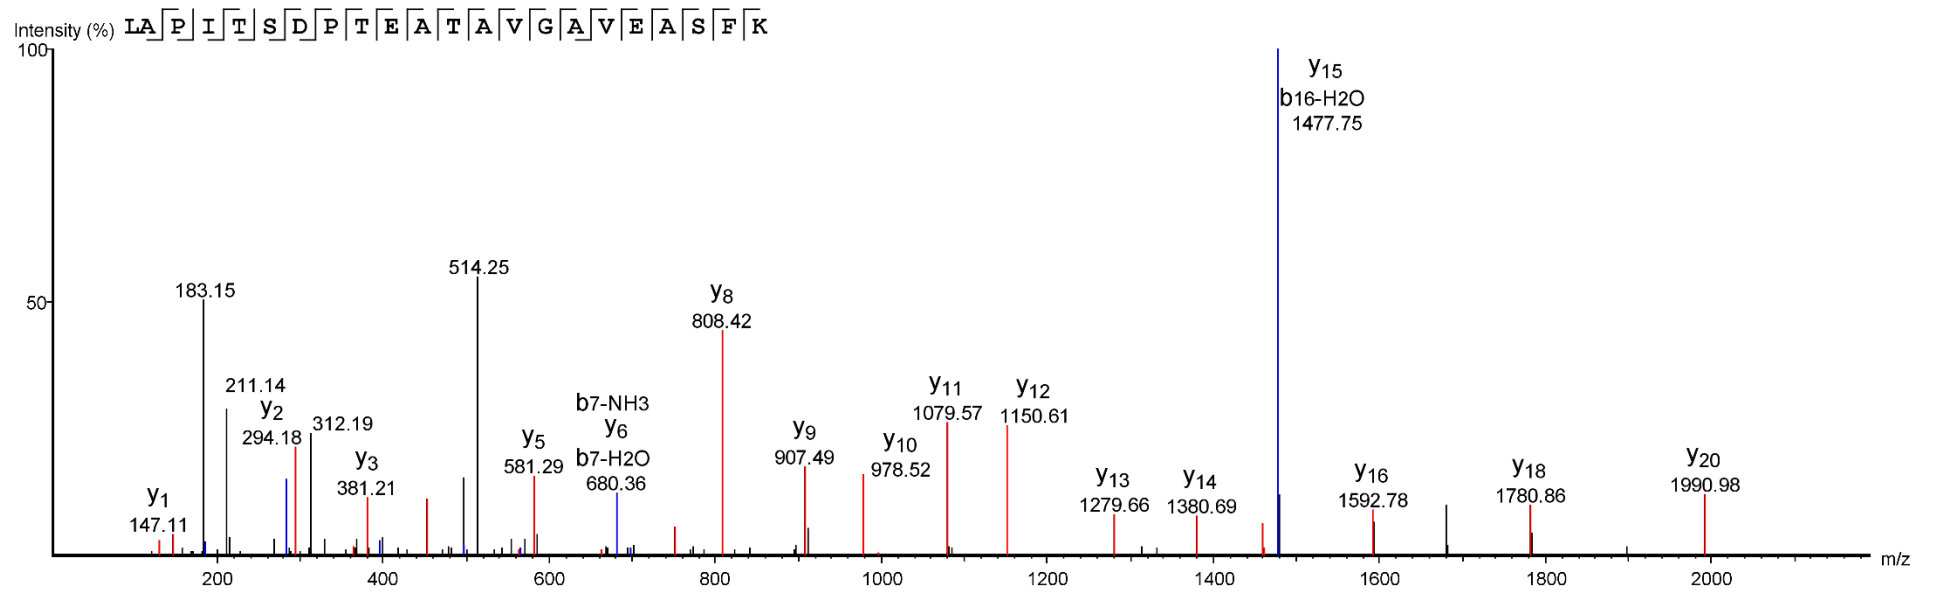

Pep20

Scan #10698

A-232: PKM<sub>(401-422)</sub>: LAP(+15.99)ITSDPTEATAVGAVEASFK

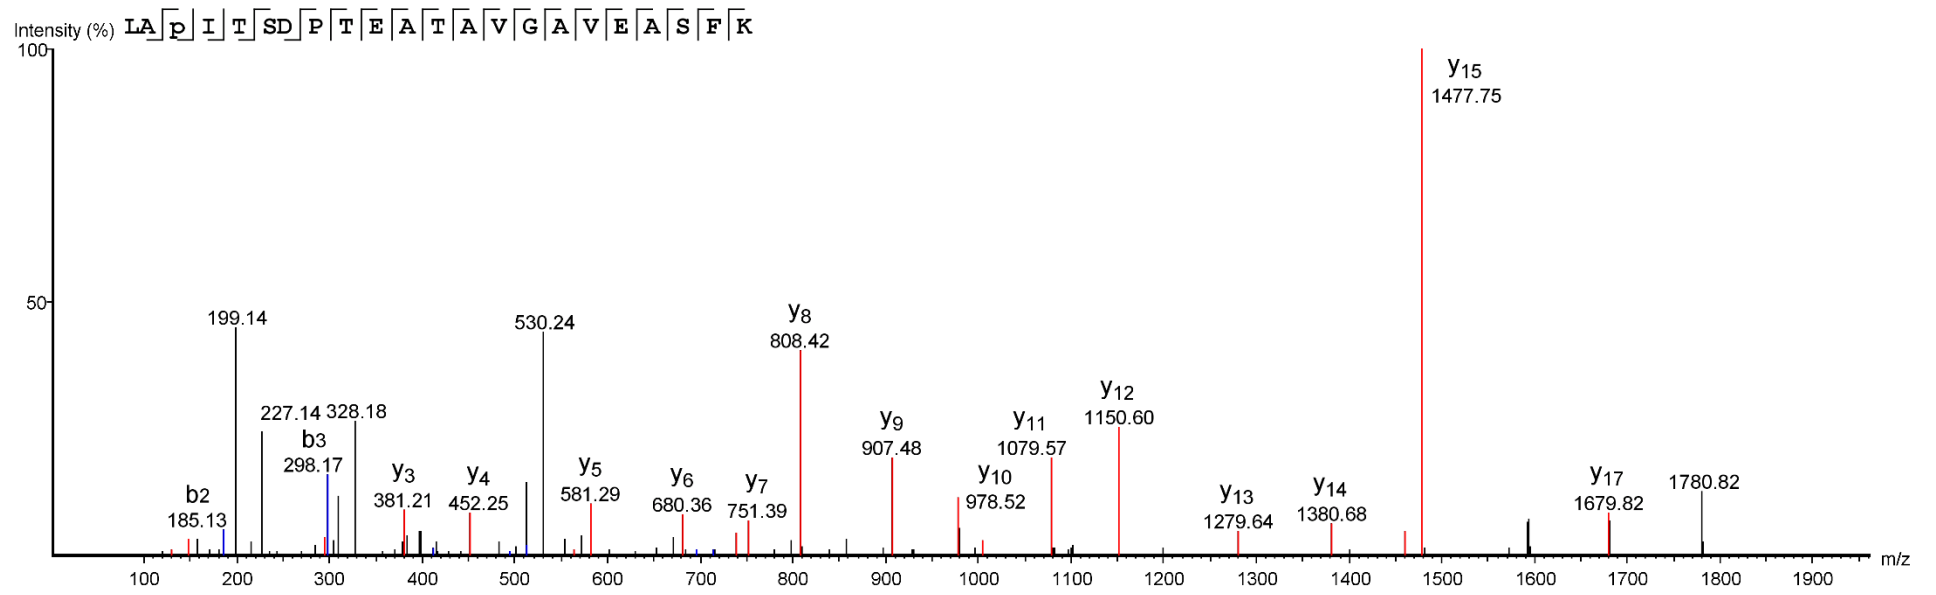

Pep20

Scan #10334

A-233: PKM<sub>(401-422)</sub>: LAPITSDP(+15.99)TEATAVGAVEASFK

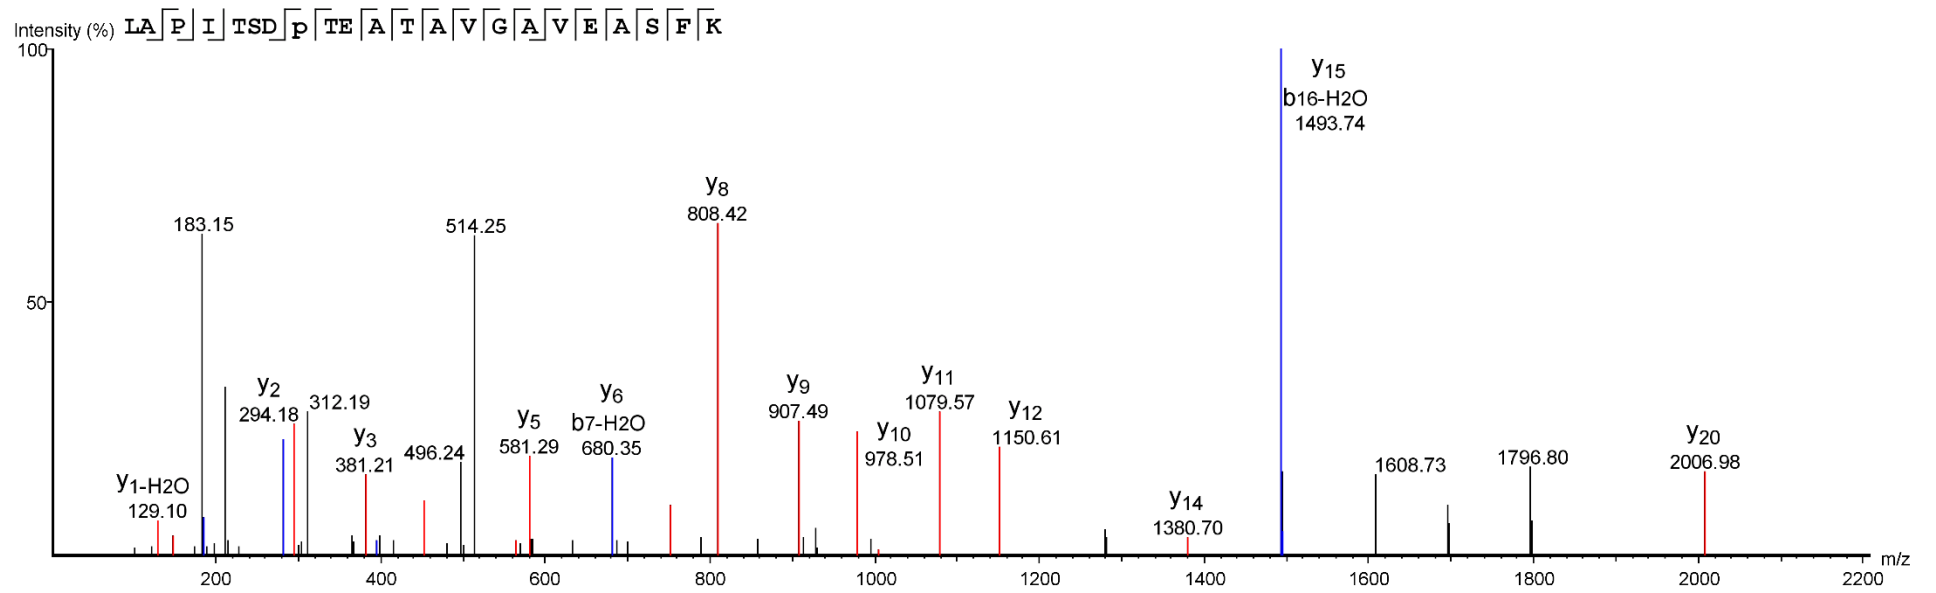

Pep20

Scan #10401

A-234: PKM<sub>(401-422)</sub>: LAP(+15.99)ITSDP(+15.99)TEATAVGAVEASFK

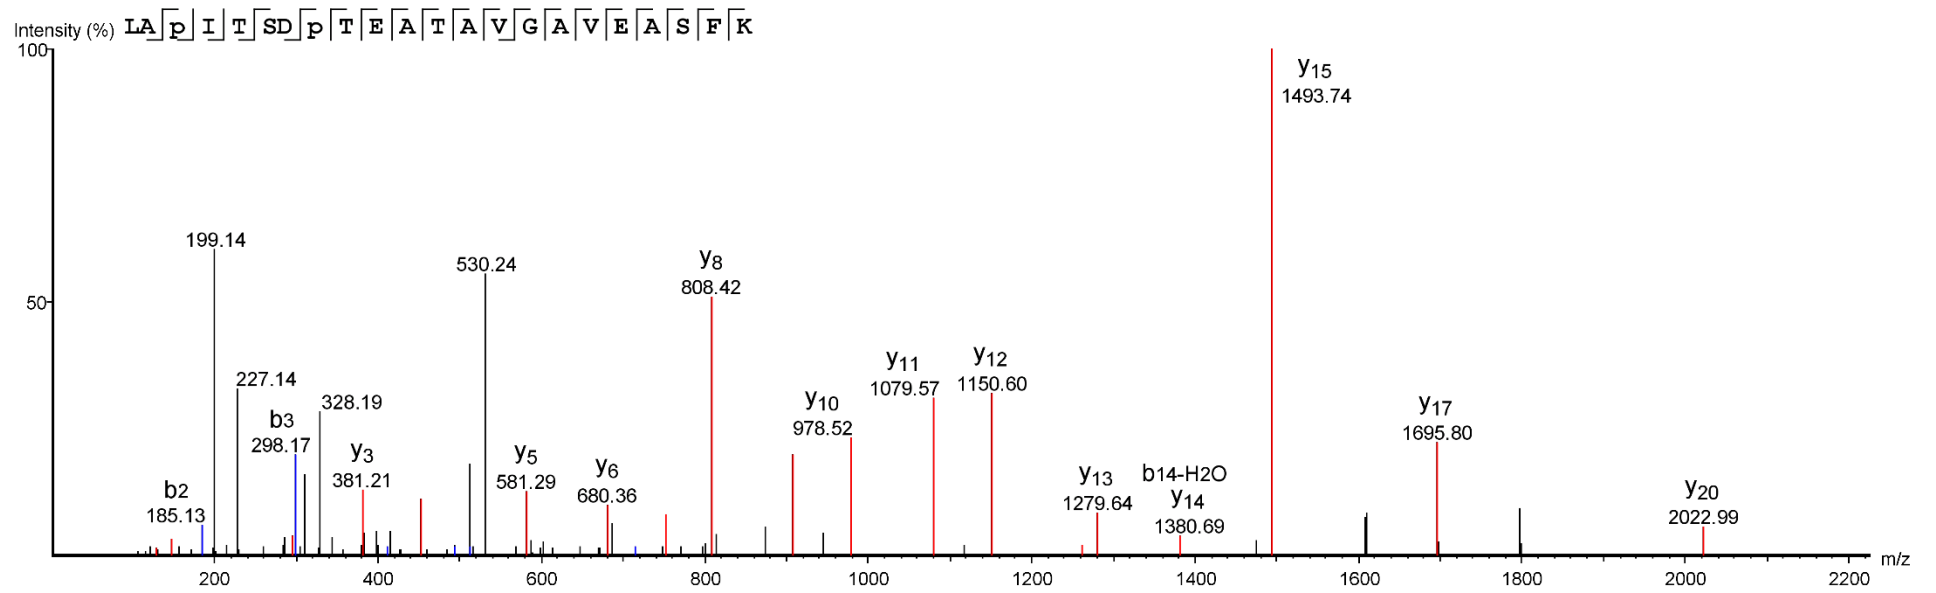

Pep20  
Scan #9917

A-235: PKM<sub>(401-422)</sub>: LAPITSDPTEATAVGAVEASFK

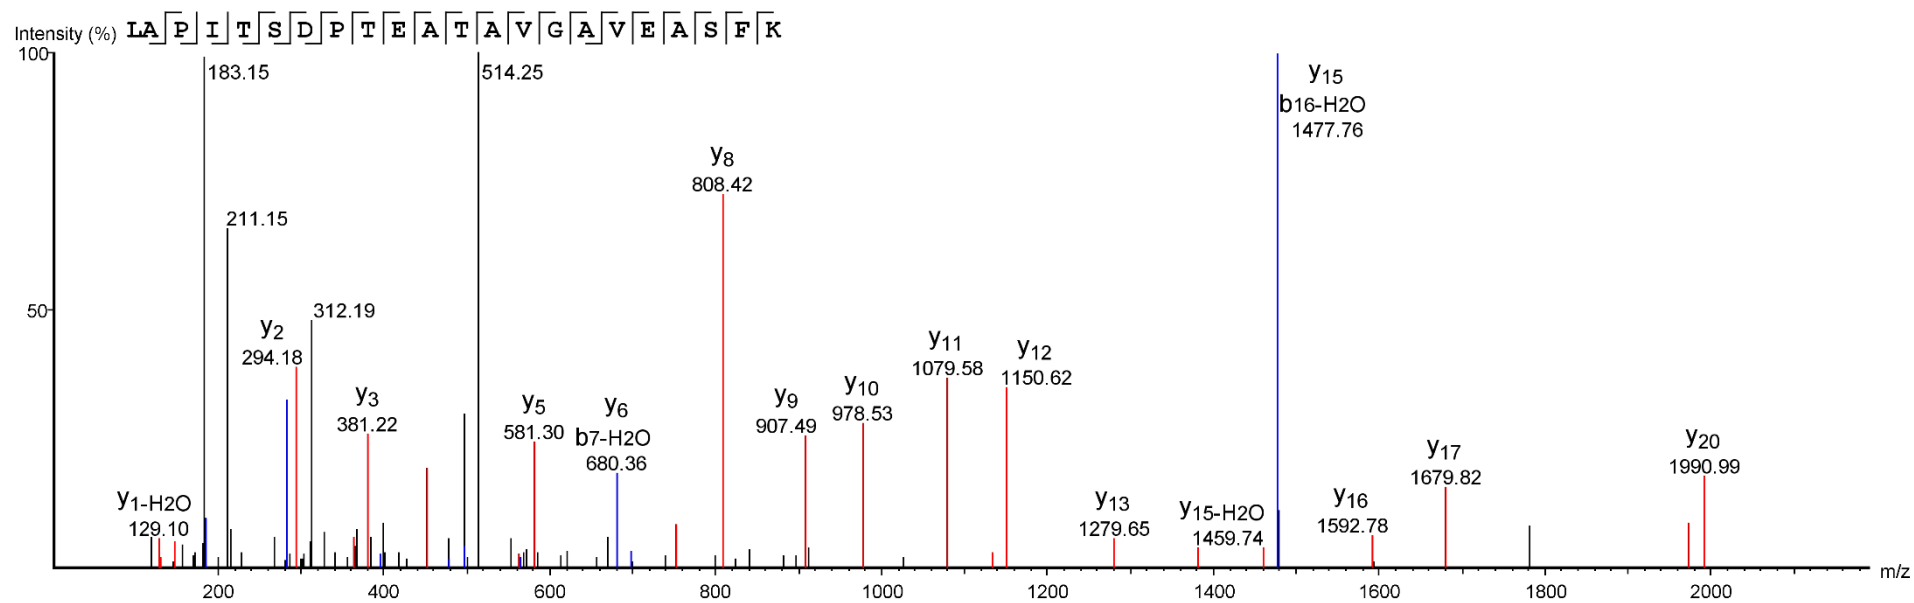

YMT55

Scan #16822

A-236: PKM<sub>(401-422)</sub>: LAPITSDPTEATAVGAVEASFK

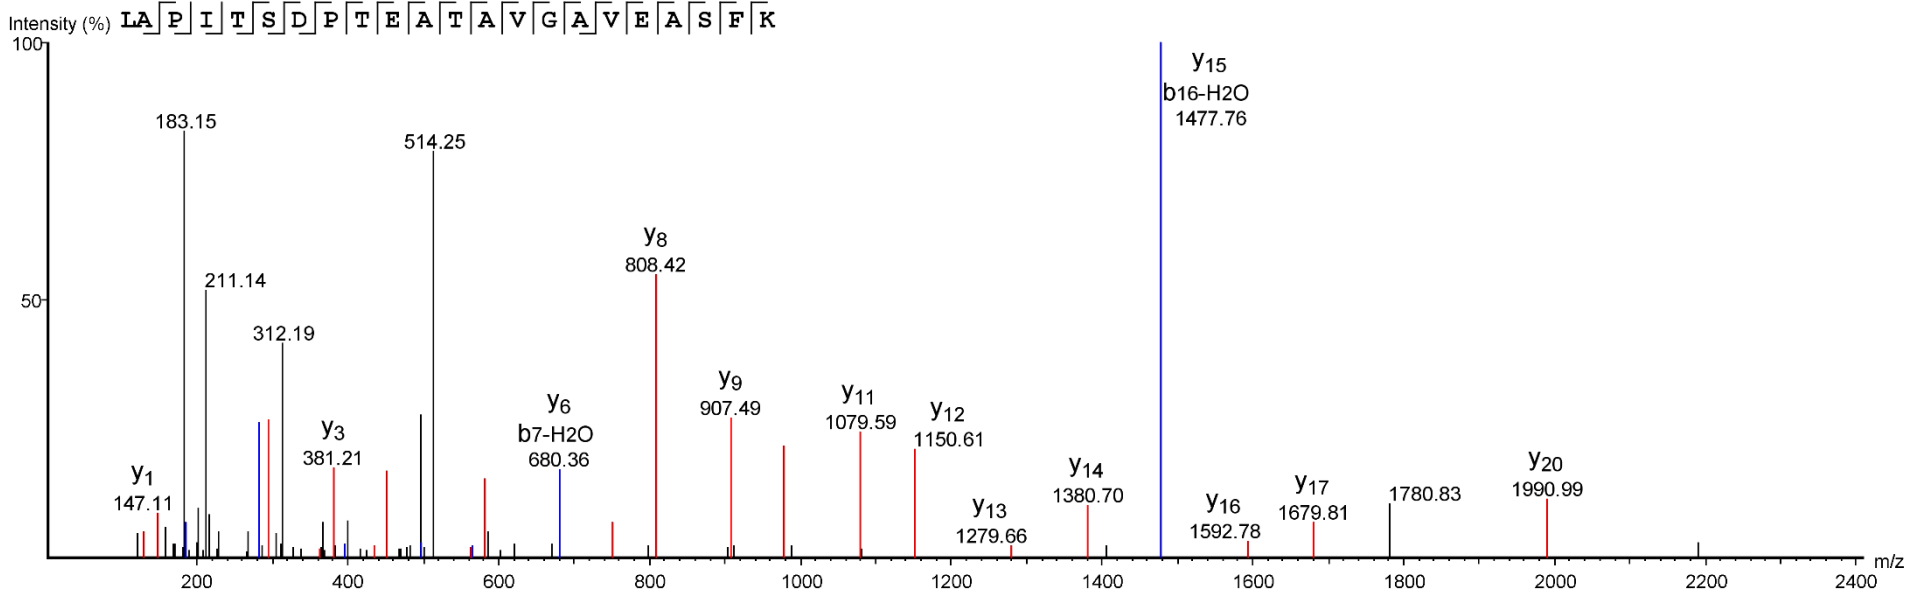

YMT56  
Scan #17542

A-237: PPP2R2A<sub>(310-330)</sub>: IWDLNMENR**P**VETYQVHEYL**R**

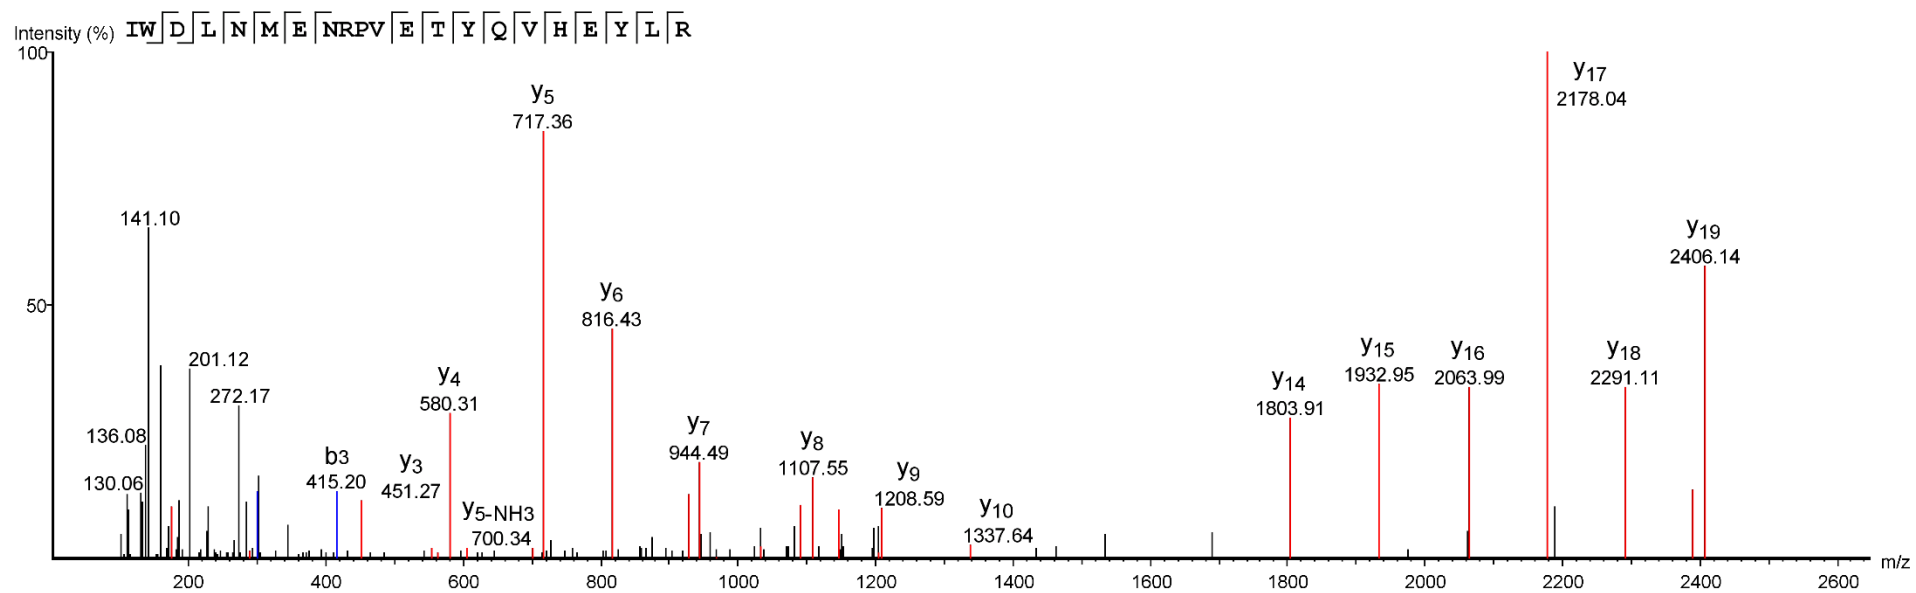

Pep27

Scan #14794

A-238: PPP2R2A<sub>(310-330)</sub>: IWDLNM(+15.99)ENR**P**VETYQVHEYL**R**

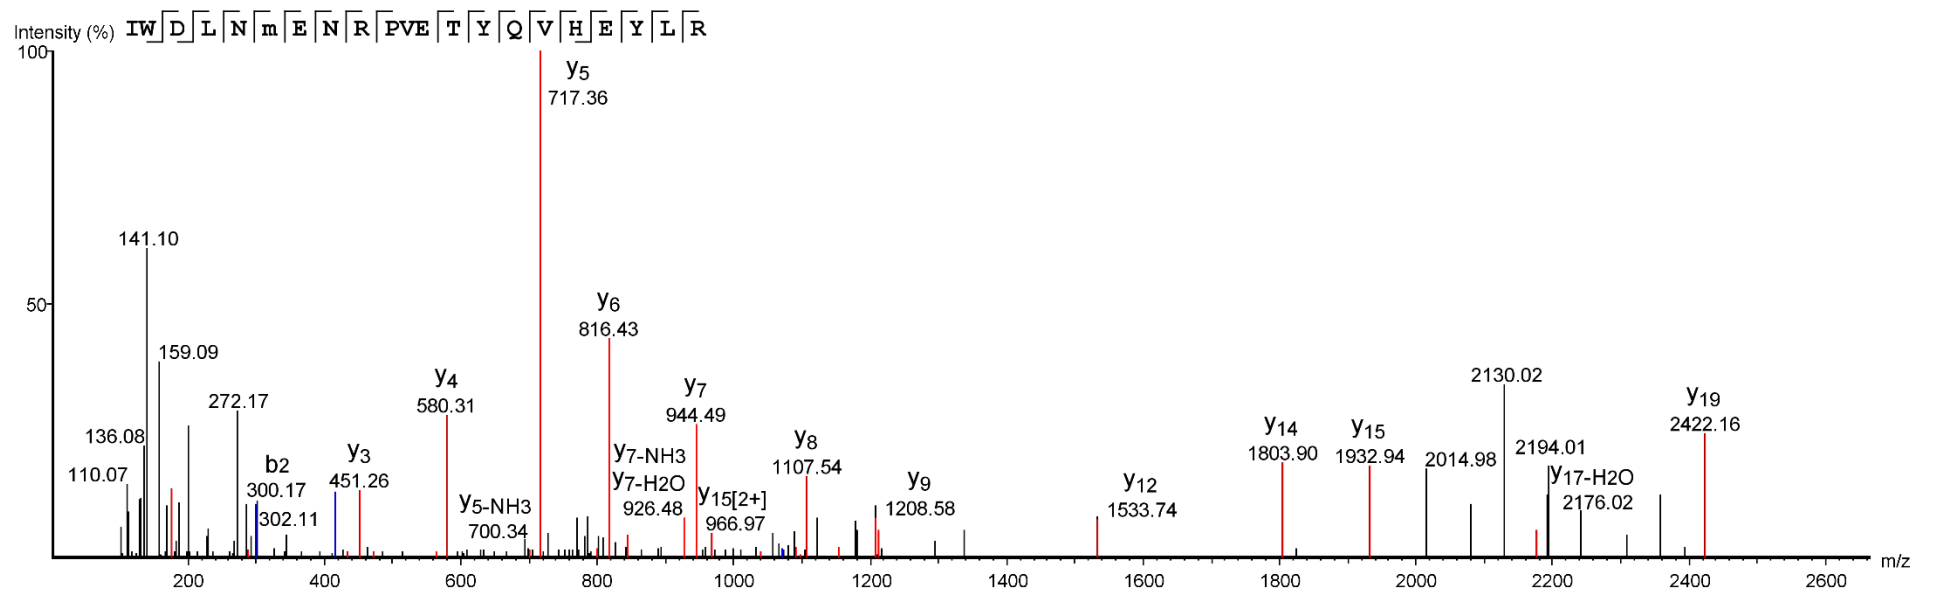

Pep27

Scan #13418



A-239: PPP2R2A<sub>(310-330)</sub>: IWDLNME<sup>NR</sup> pVET<sup>Y</sup>QV<sup>H</sup>EY<sup>L</sup>R

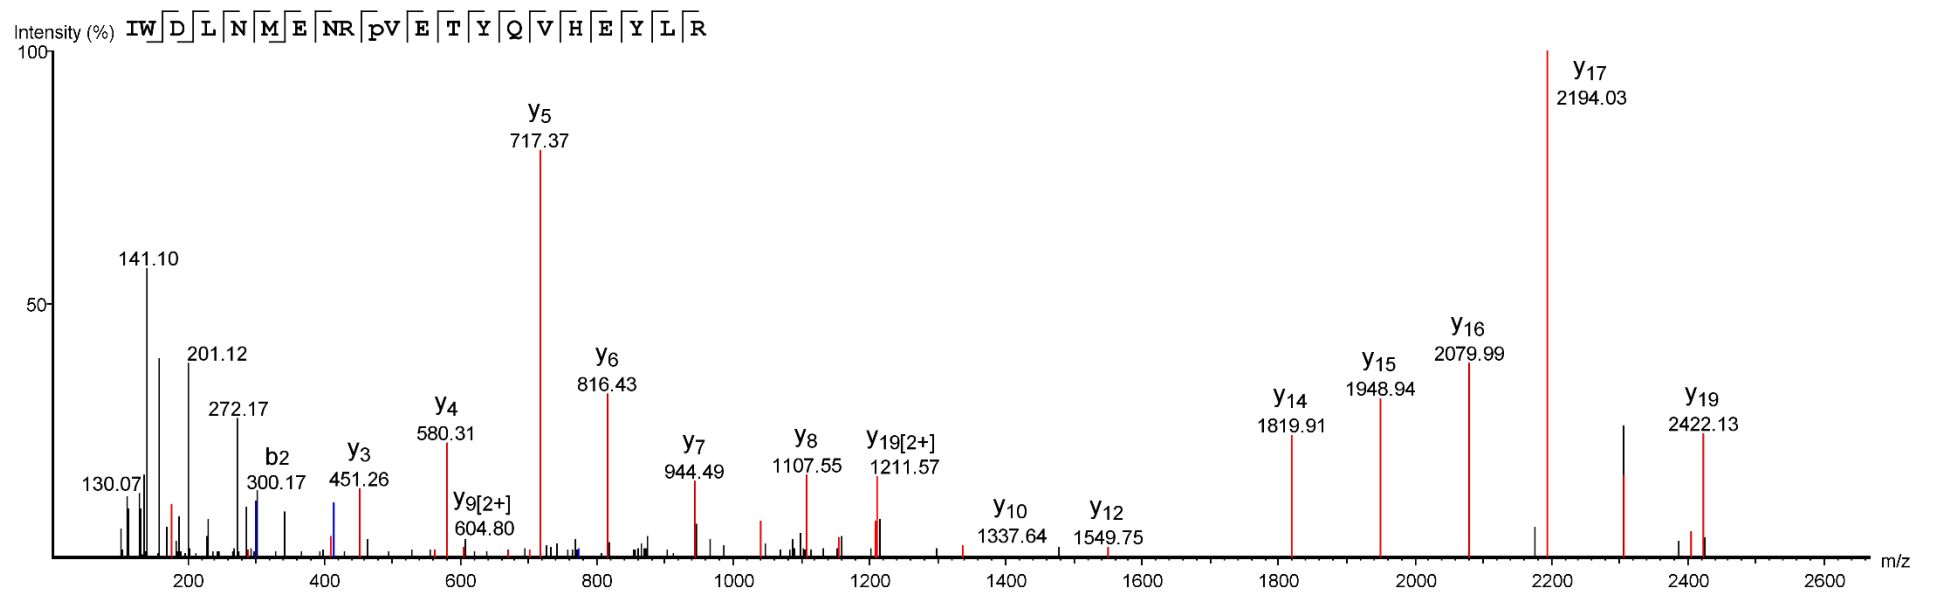

Pep27

Scan #14298

A-240: PPP2R2A<sub>(310-330)</sub>: IWDLNM(+15.99)ENRP(+15.99)VET~~Y~~QVHEYL~~R~~

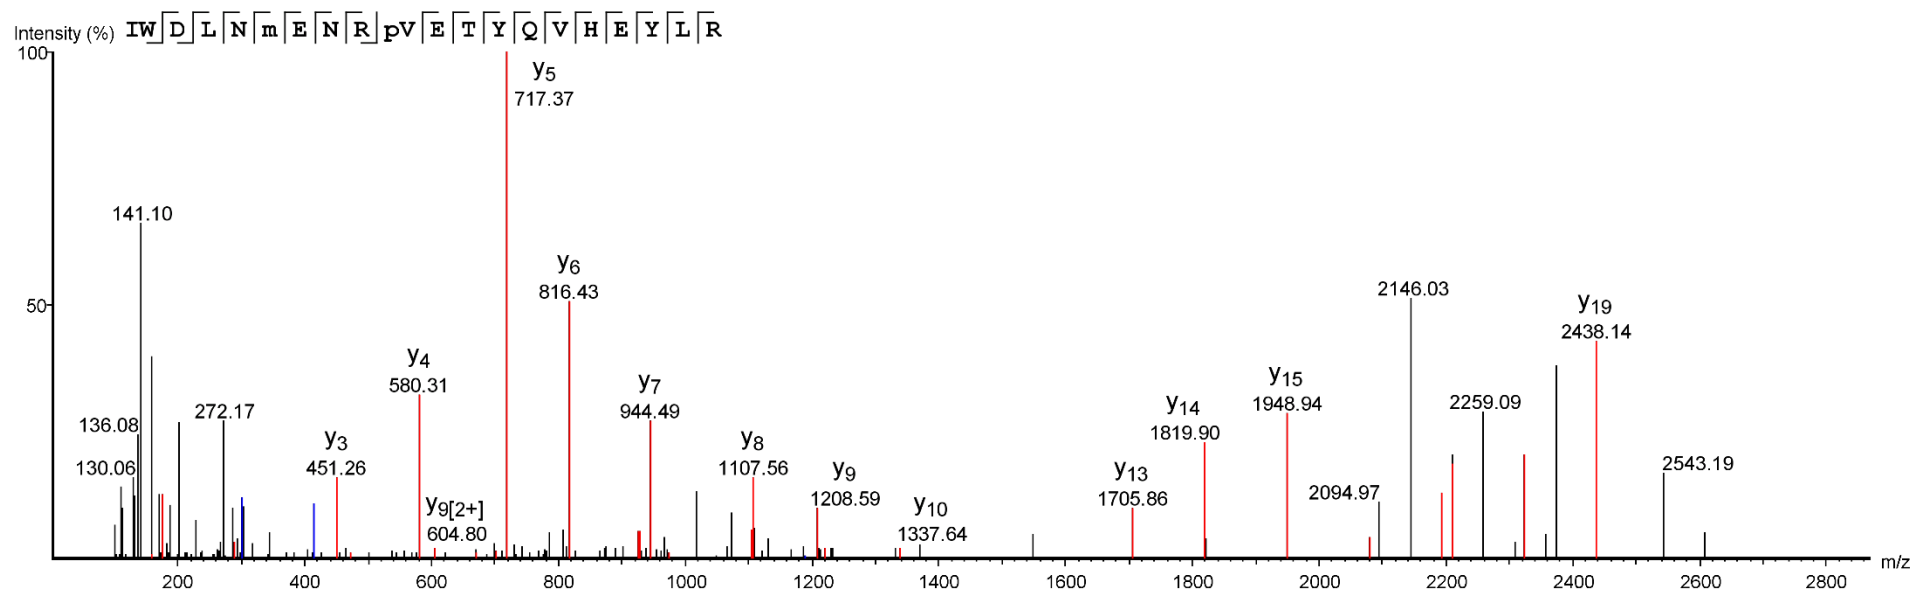

Pep27

Scan #12986

A-241: PPP2R2A<sub>(310-330)</sub>: IWDLNMENR**P**VETYQVHEYL**R**

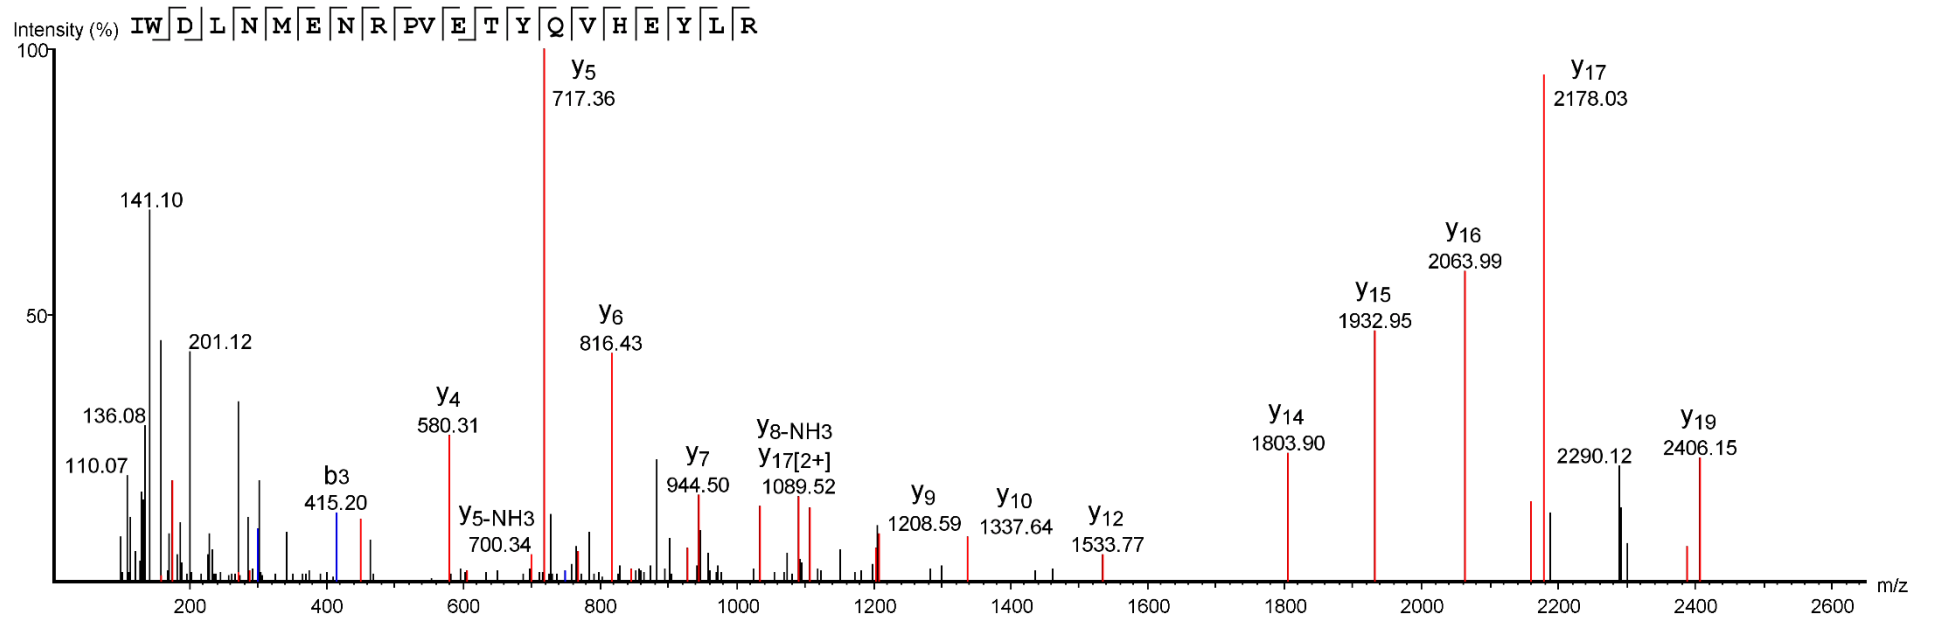

YMT79

Scan #15132

A-242: PPP2R2A<sub>(310-330)</sub>: IWDLNMENR**P**VETYQVHEYL**R**

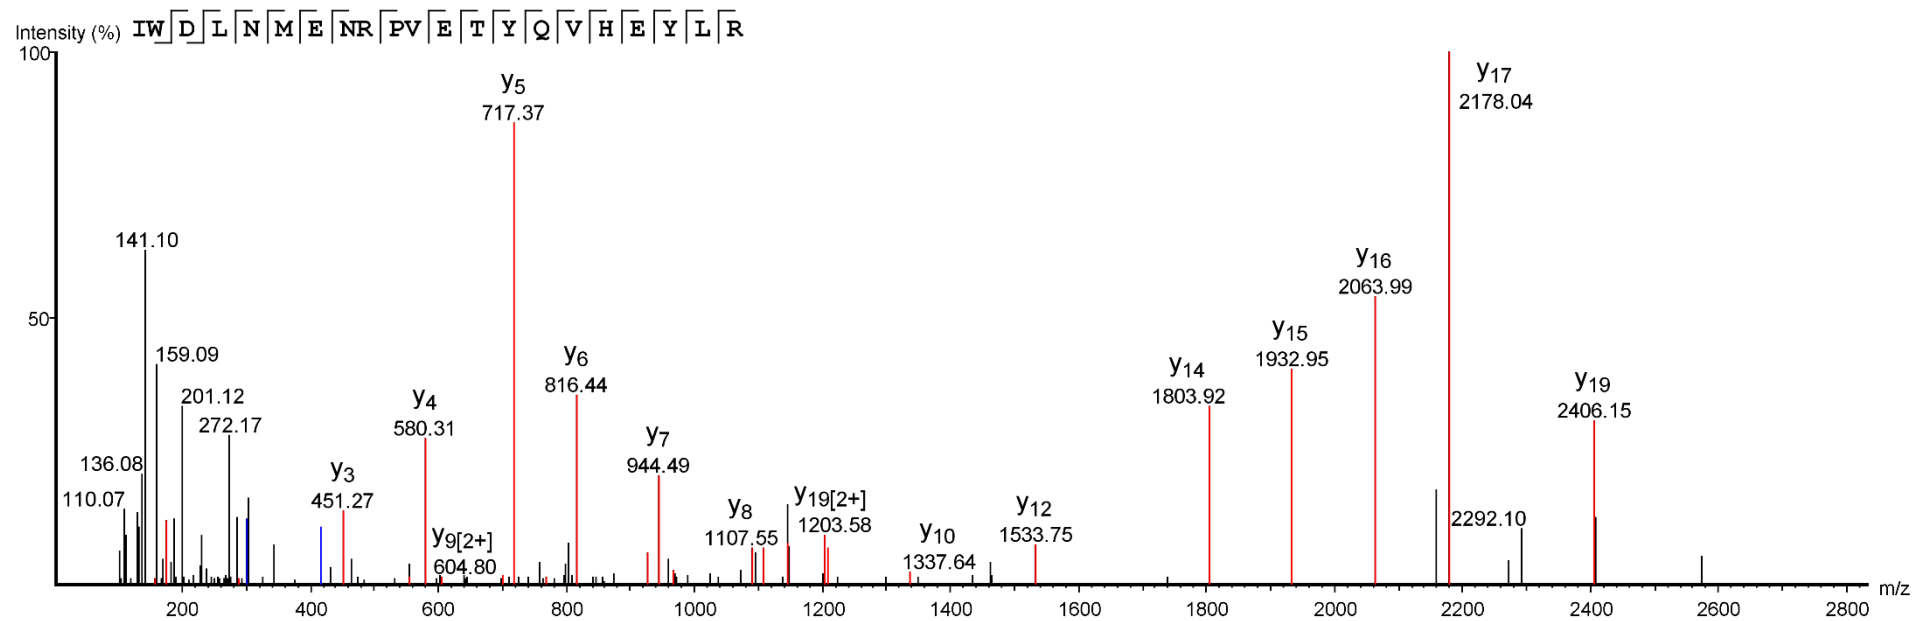

YMT80

Scan #14837

A-243: PPP2R2A<sub>(310-330)</sub>: IWDLN(+15.99)ENR**P**VETYQVHEYL**R**

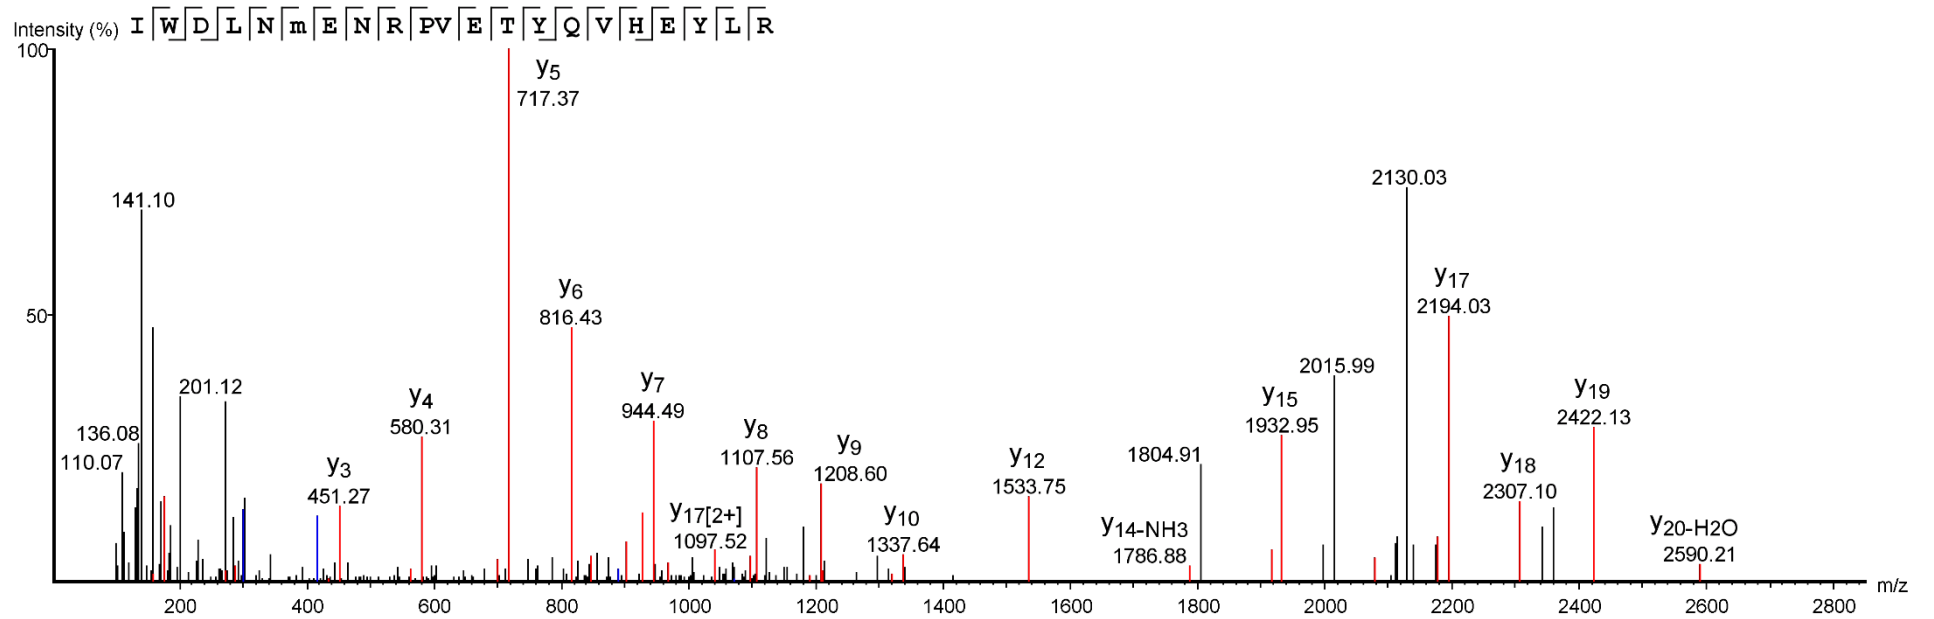

YMT79

Scan #13664

A-244: PPP2R2A<sub>(310-330)</sub>: IWDLN(+15.99)ENR**P**VETYQVHEYL**R**

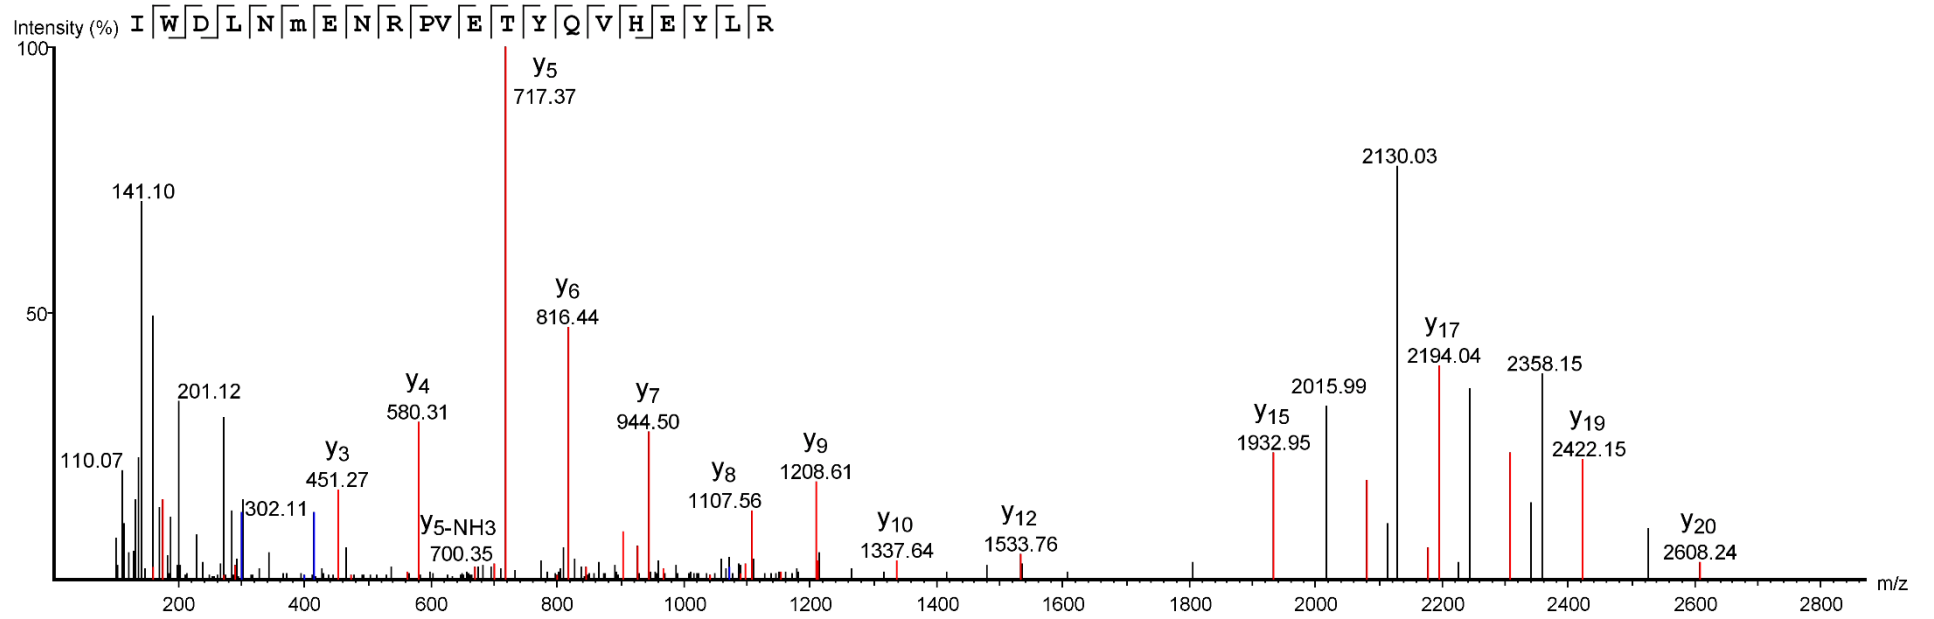

YMT80

Scan #13370

A-245: SPRY2<sub>(5-19)</sub>: AQSGNGSQPLLQTPR

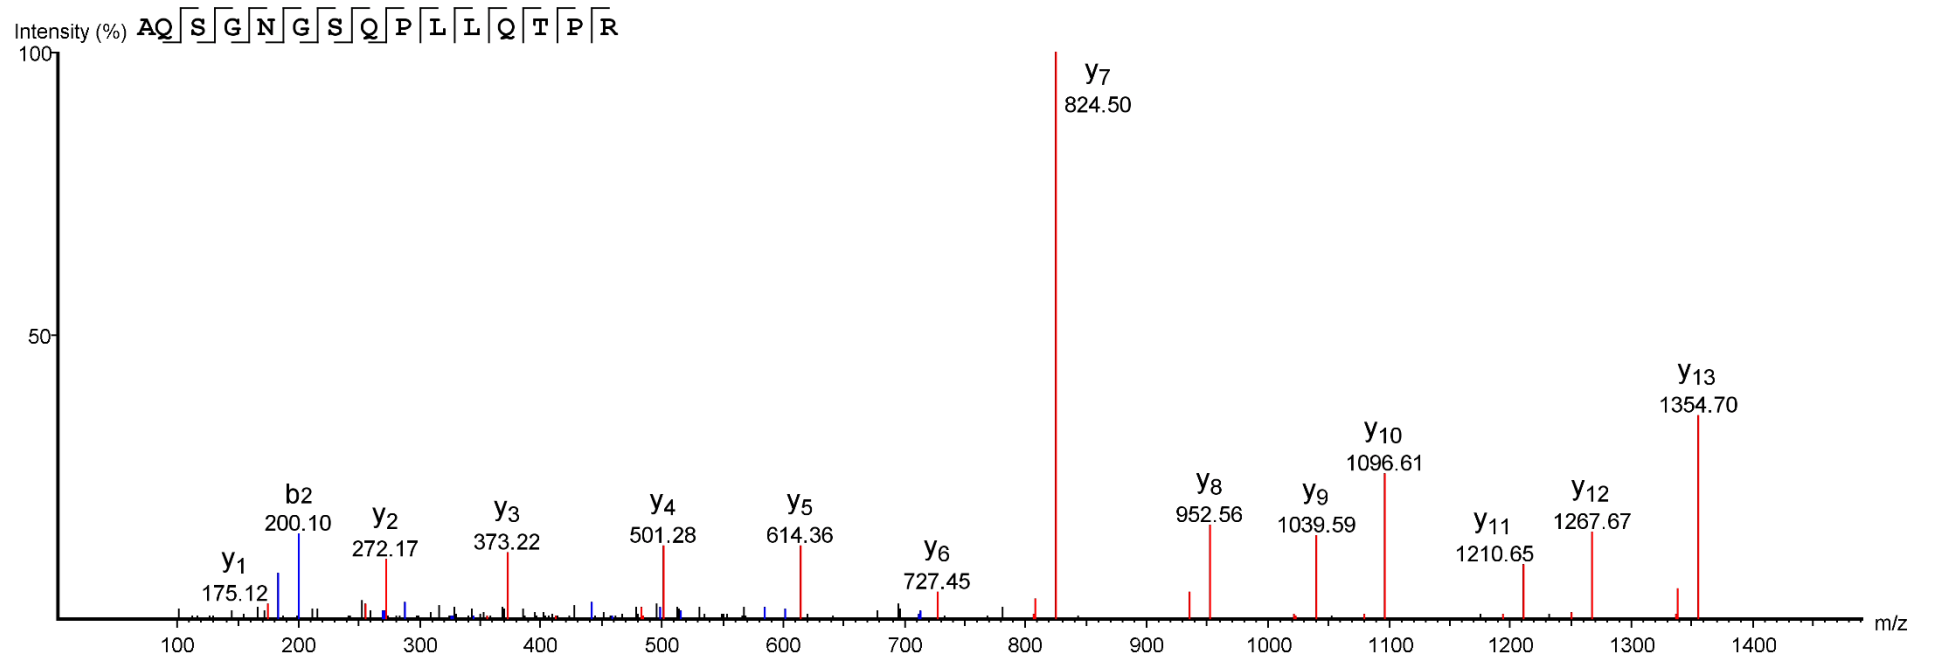

Pep11

Scan #8134

A-246: SPRY2<sub>(5-19)</sub>: AQSGNGSQPLLQTP(+15.99)R

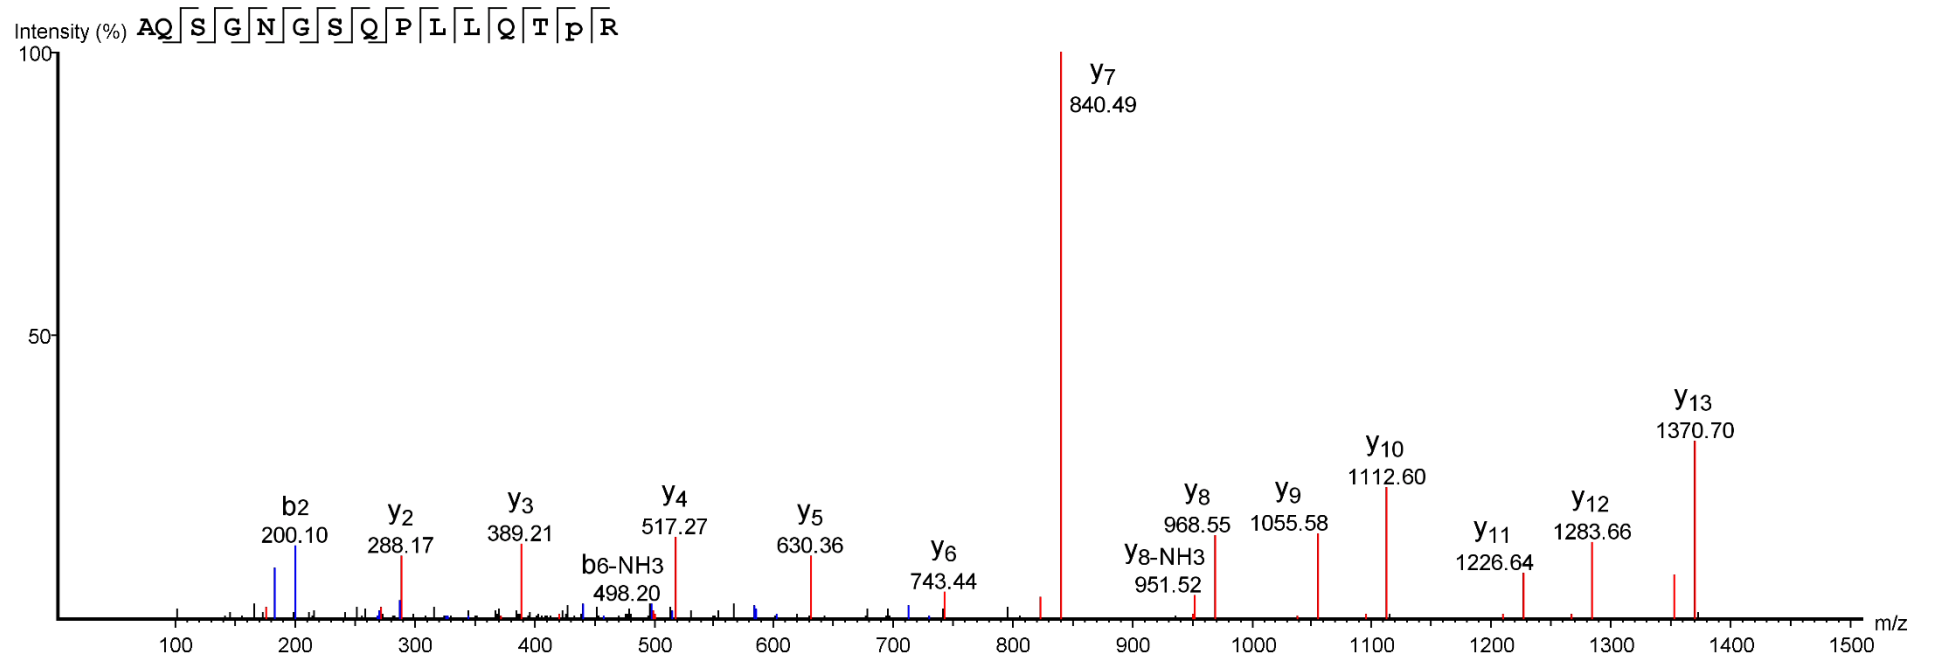

Pep11

Scan #7096



A-249: SPRY2<sub>(5-19)</sub>: A Q S G N G S Q P L L Q T P R

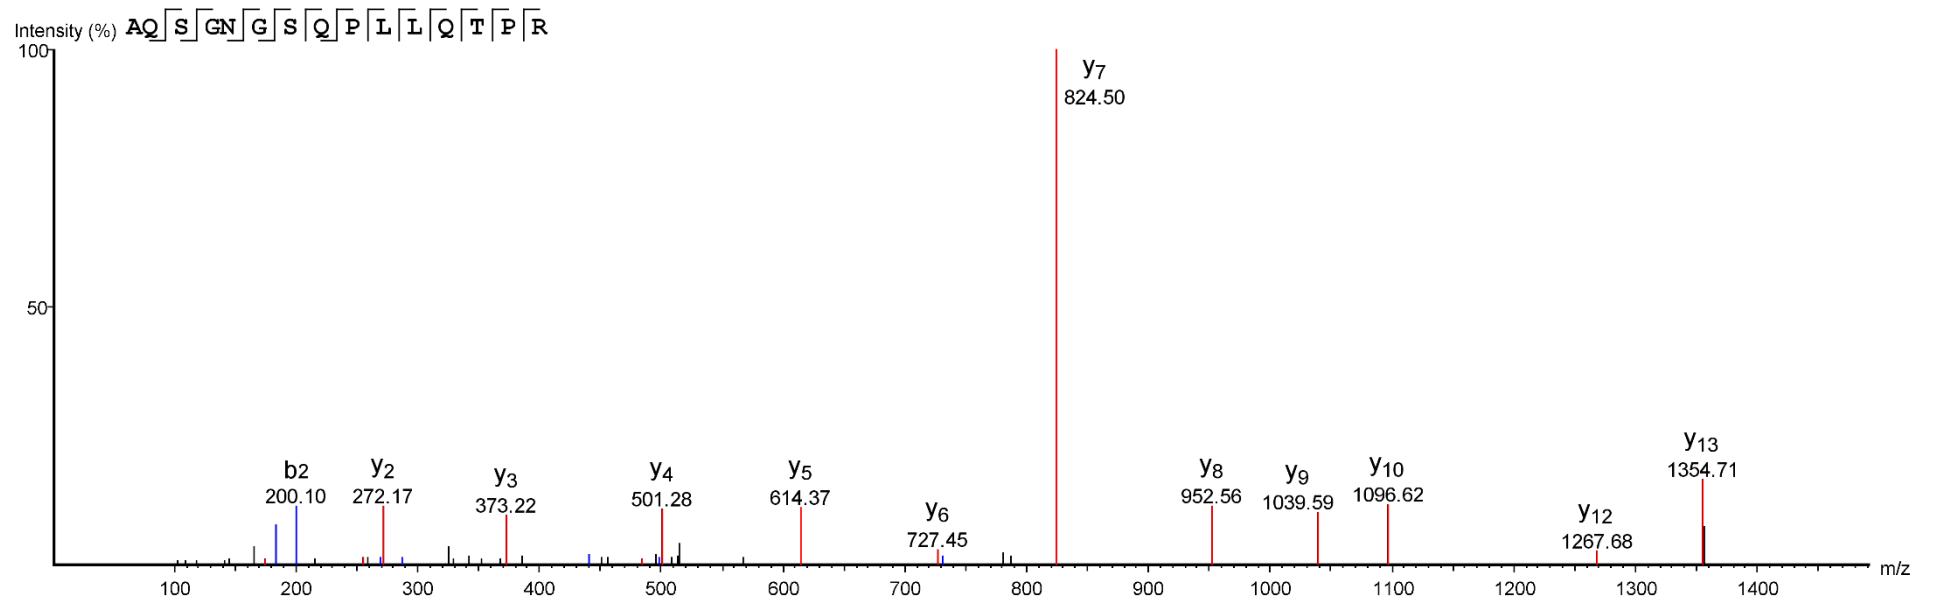

YMT47

Scan #7997

A-250: SPRY2<sub>(5-19)</sub>: AQSGNGSQPLLQTPR

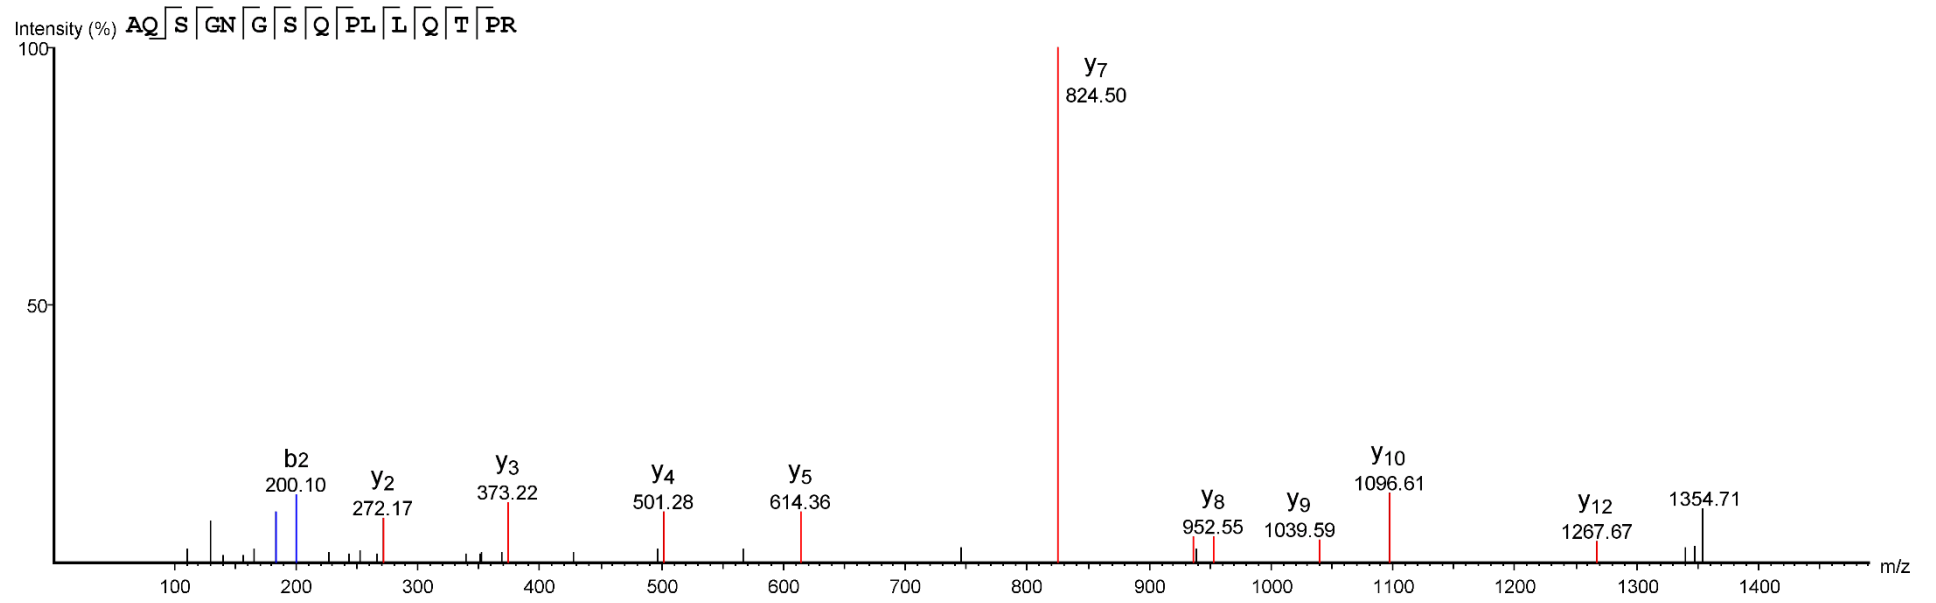

YMT48

Scan #8447

A-251: SPRY2<sub>(135-151)</sub>: LLGSSFSSG**P**VADGIIR

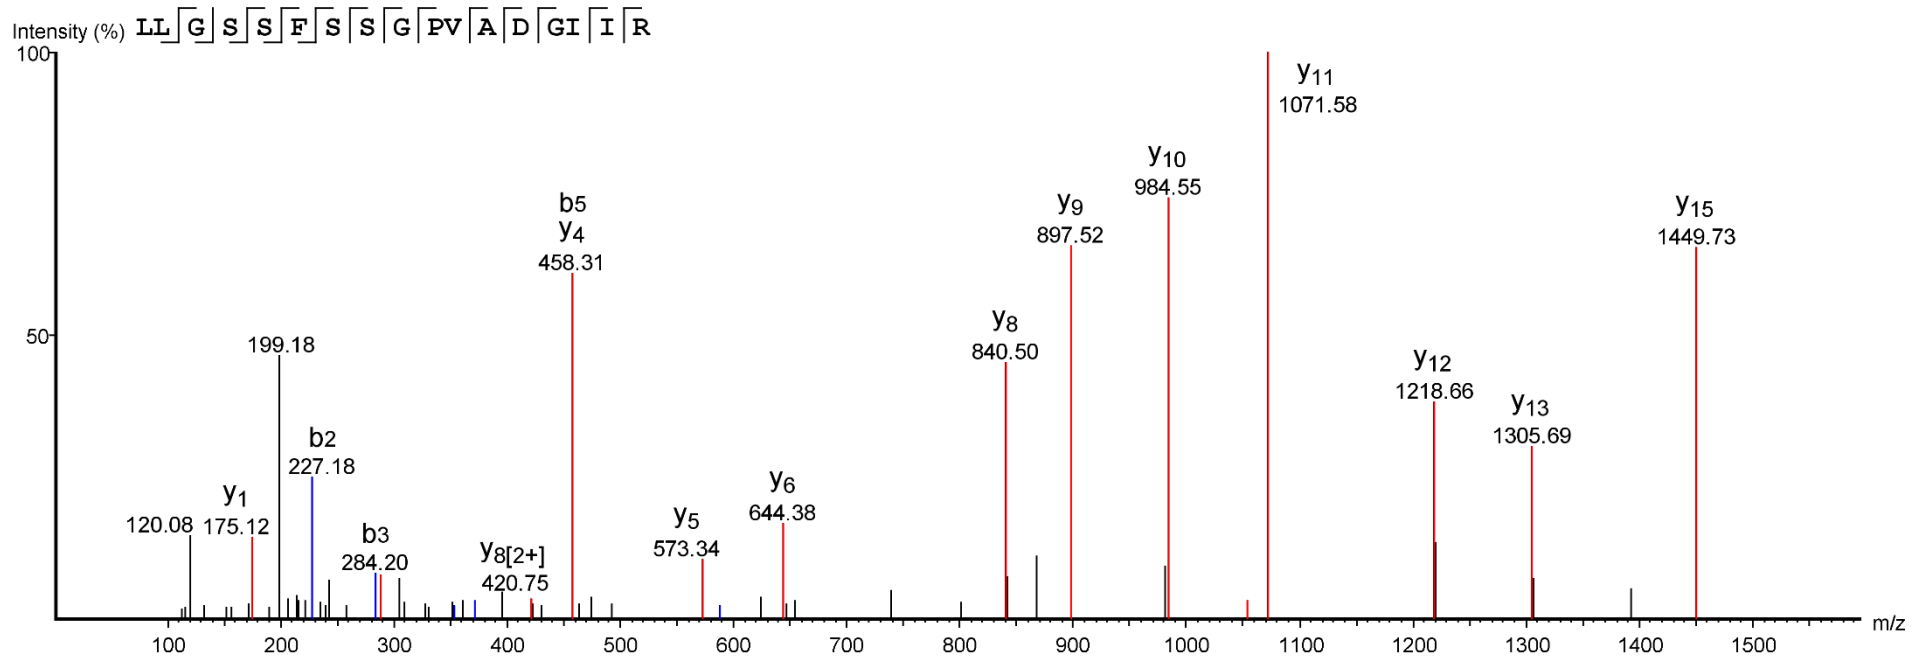

Pep17

Scan #15189

A-252: SPRY2<sub>(135-151)</sub>: LLGSSFSSGP(+15.99)VADGIIR

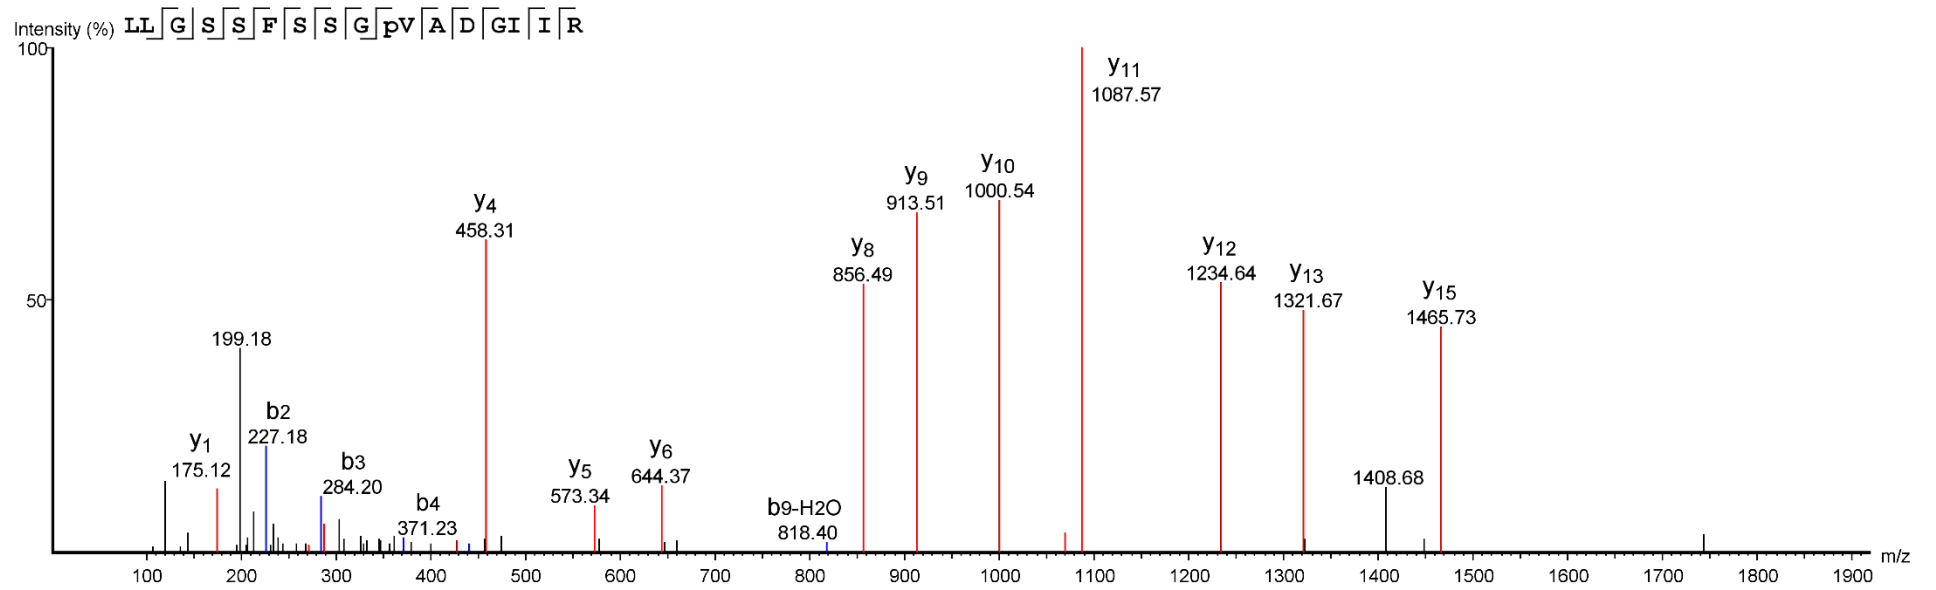

Pep17

Scan #14371

A-253: SPRY2<sub>(135-151)</sub>: LLGSSFSFGPVADGIIR

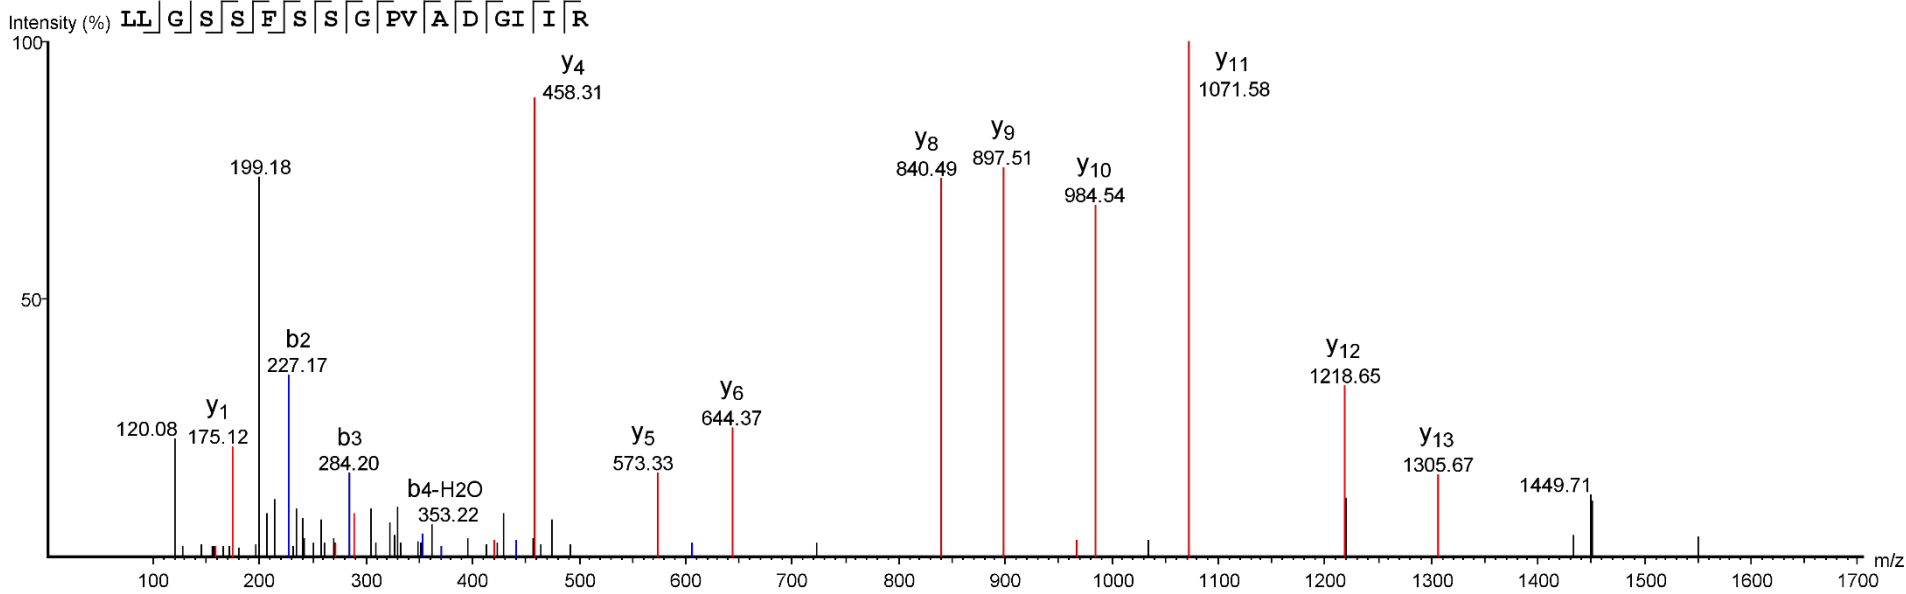

YMT29  
Scan #18161

A-254: SPRY2<sub>(135-151)</sub>: LLGSSFSSG**P**VADGIIR

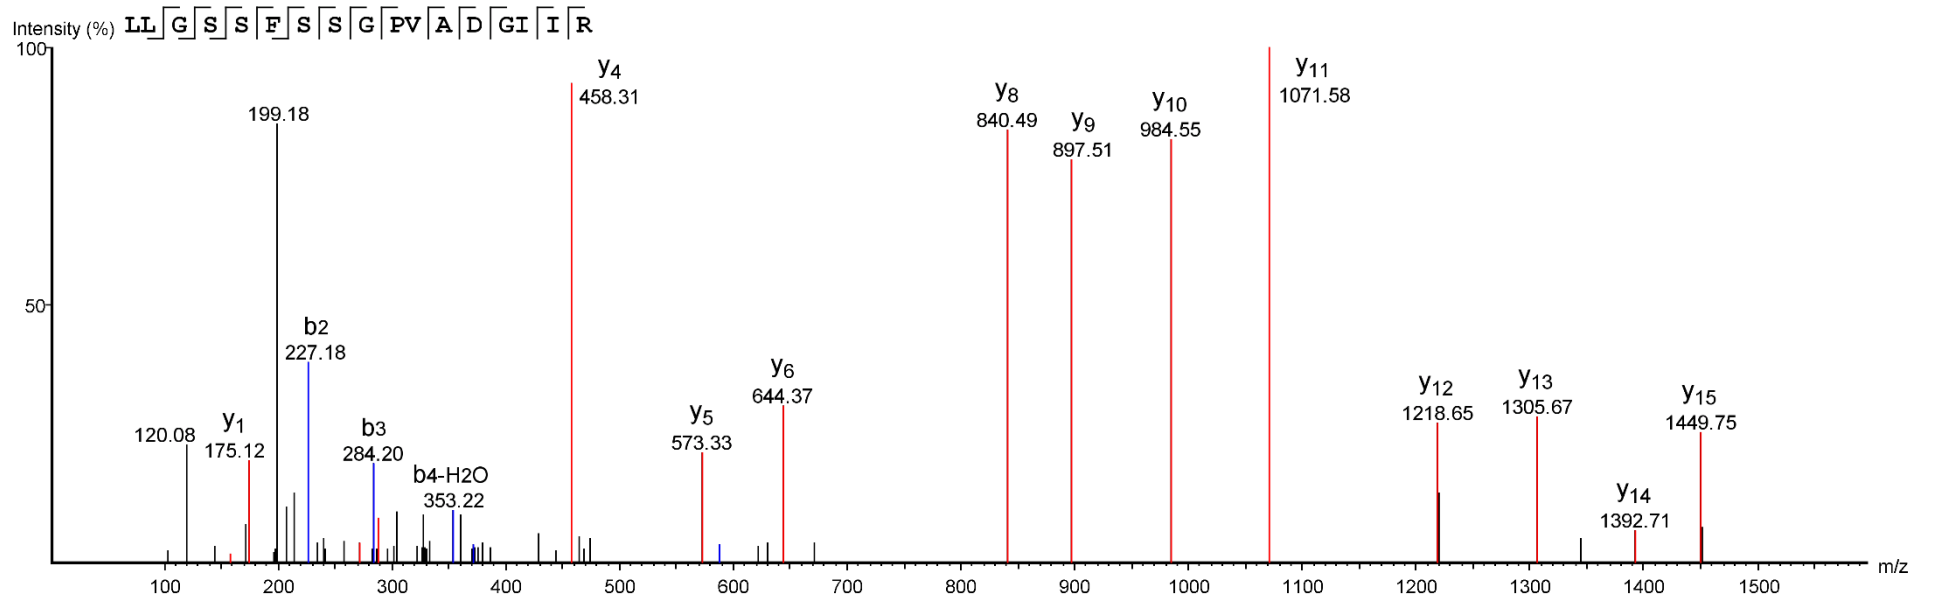

YMT30

Scan #18016

A-257: SPRY2<sub>(135-151)</sub>: LLGSSFSSG**P**VADGIIR

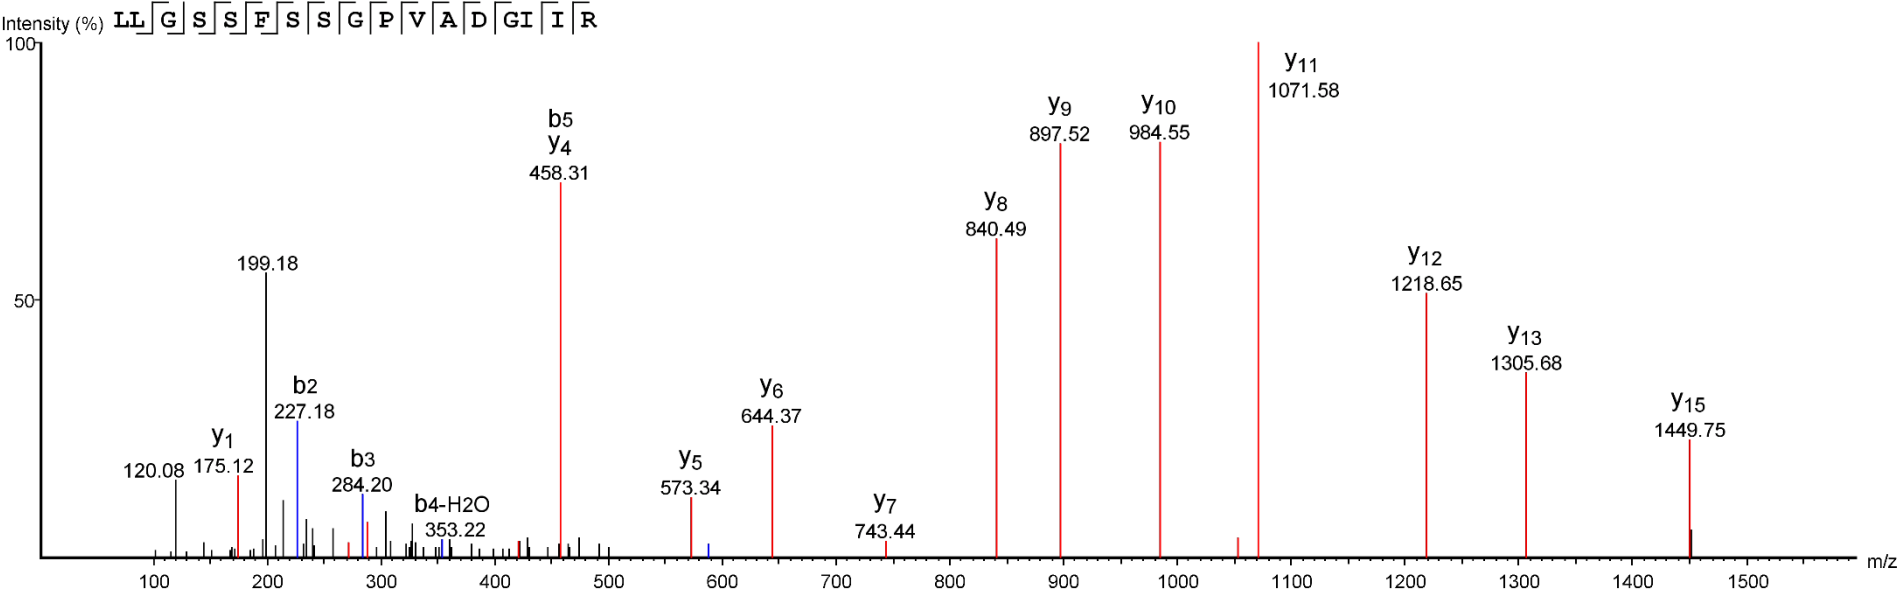

YMT47

Scan #15516

A-258: SPRY2<sub>(135-151)</sub>: LLGSSFSSG**P**VADGIIR

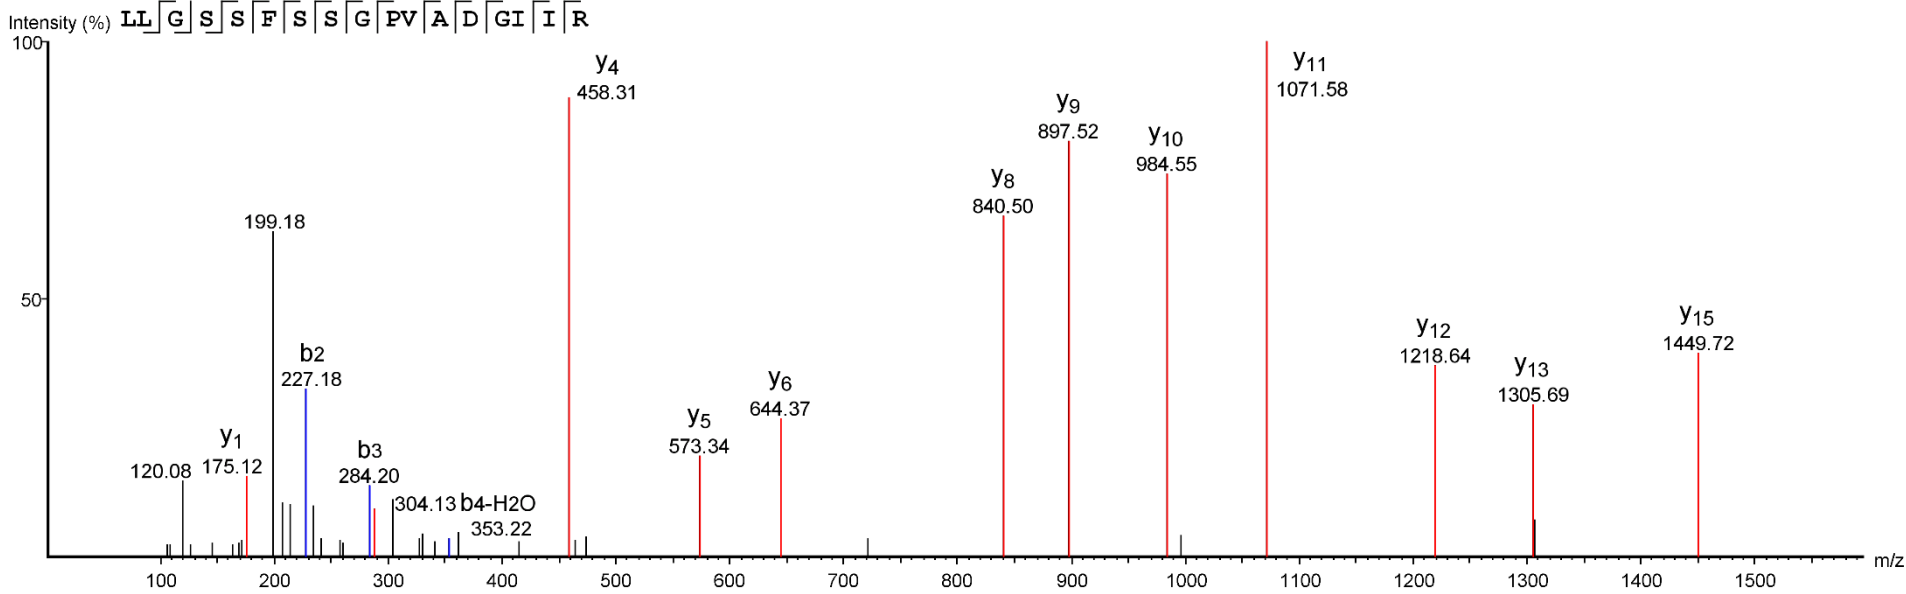

YMT48  
Scan #16792



A-259: SPRY2<sub>(156-168)</sub>: SELKPGELKPLSK

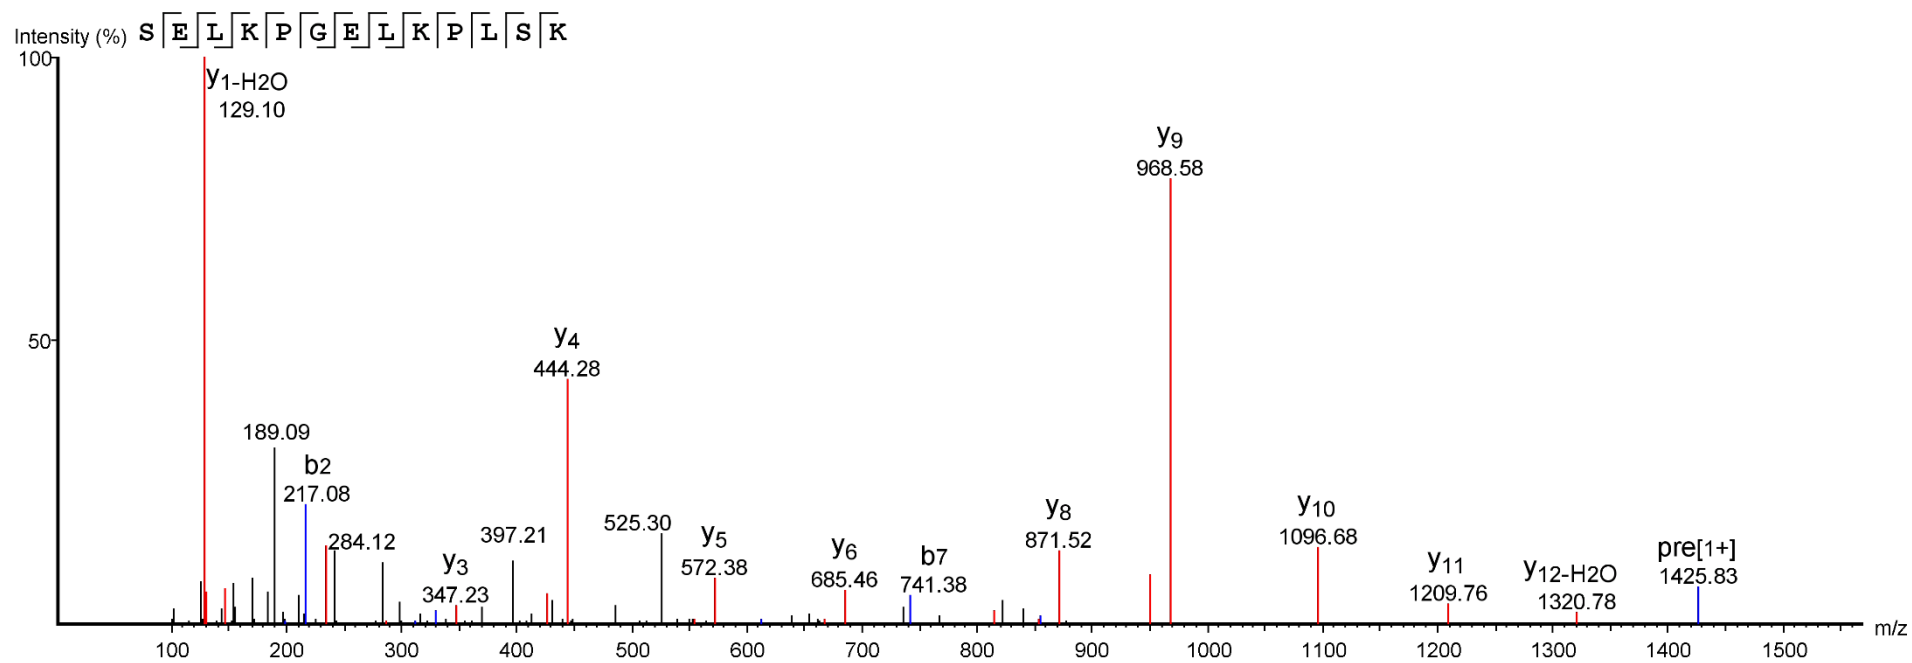

Pep17

Scan #5908

A-260: SPRY2<sub>(156-168)</sub>: SELKP(+15.99)GELKPLSK

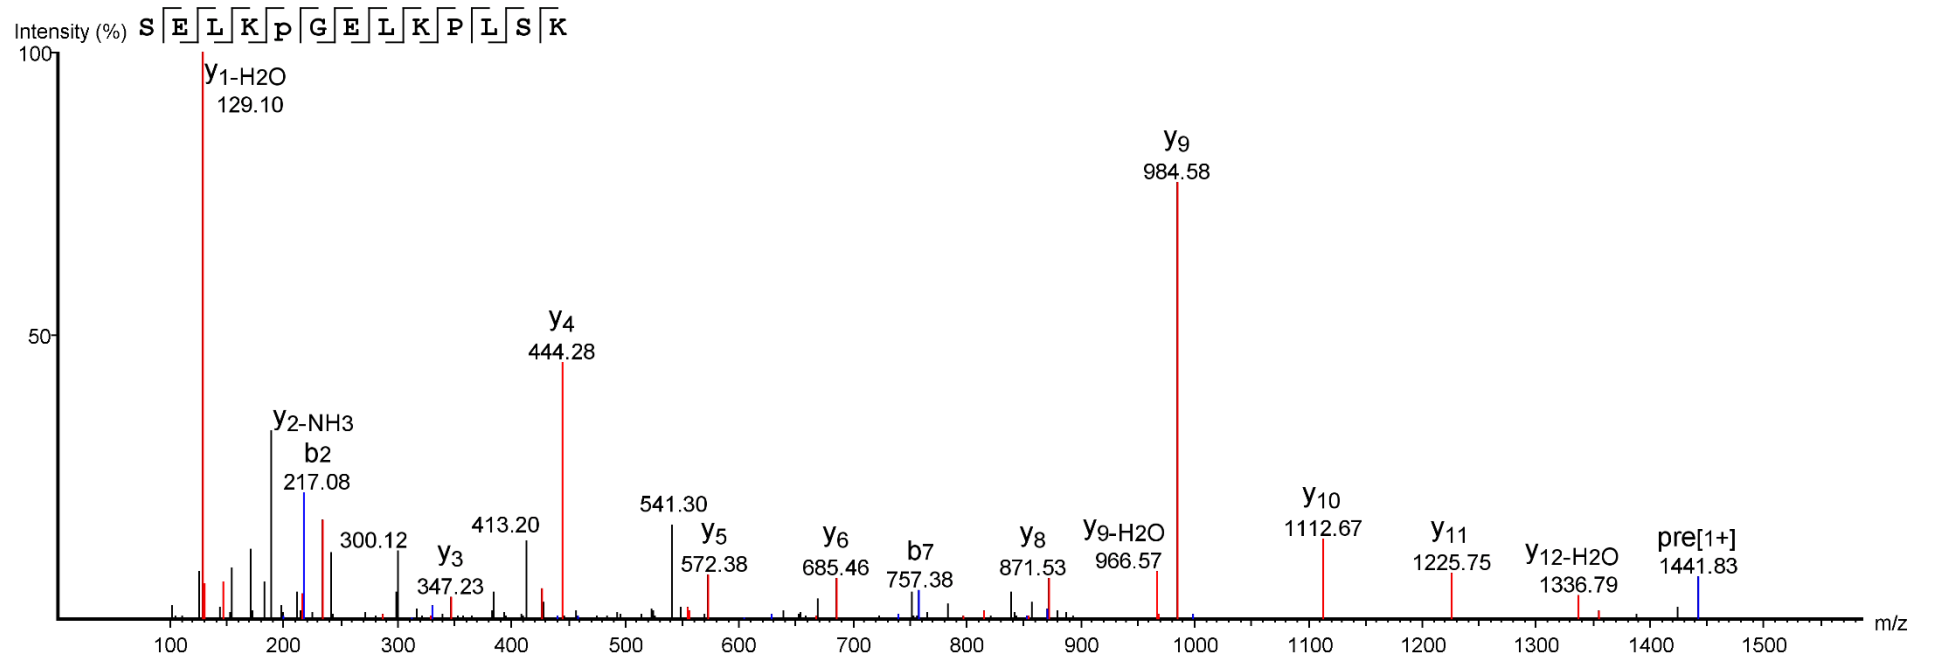

Pep17

Scan #4732

A-261: SPRY2<sub>(156-168)</sub>: SELKPGELKPLSK

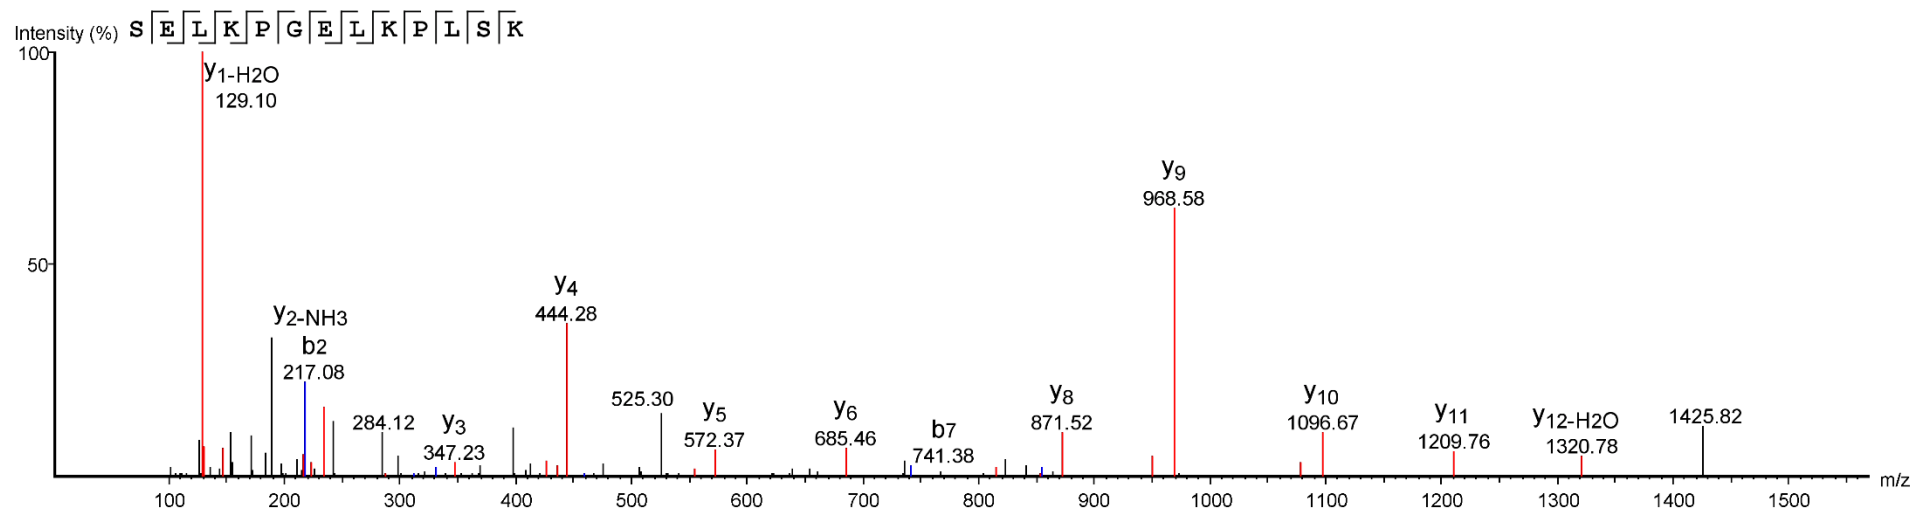

YMT29

Scan #7044

A-262: SPRY2<sub>(156-168)</sub>: SELKPGELKPLSK

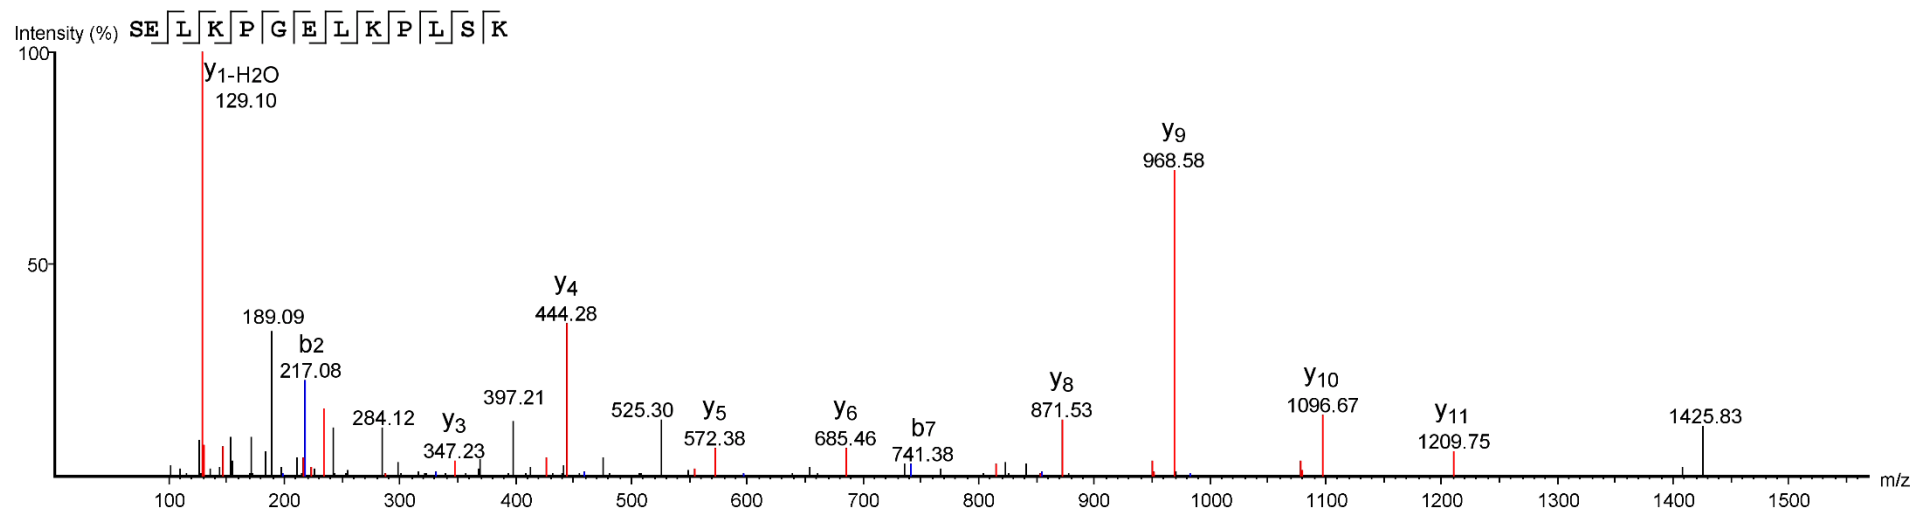

YMT30

Scan #6676

A-265: SPRY2<sub>(156-168)</sub>: SELKPGELKPLSK

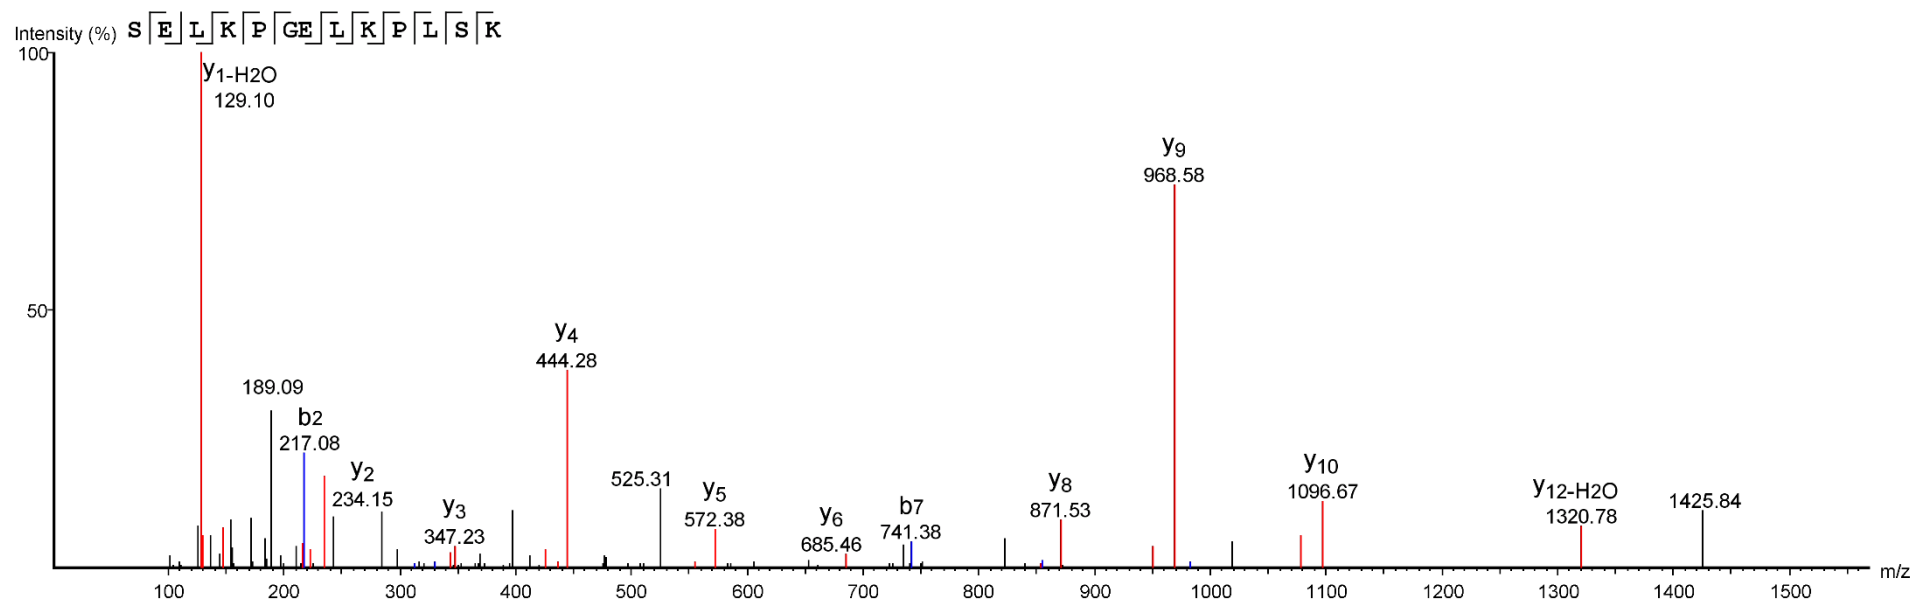

YMT47

Scan #6470

A-266: SPRY2<sub>(156-168)</sub>: SELKPGELKPLSK

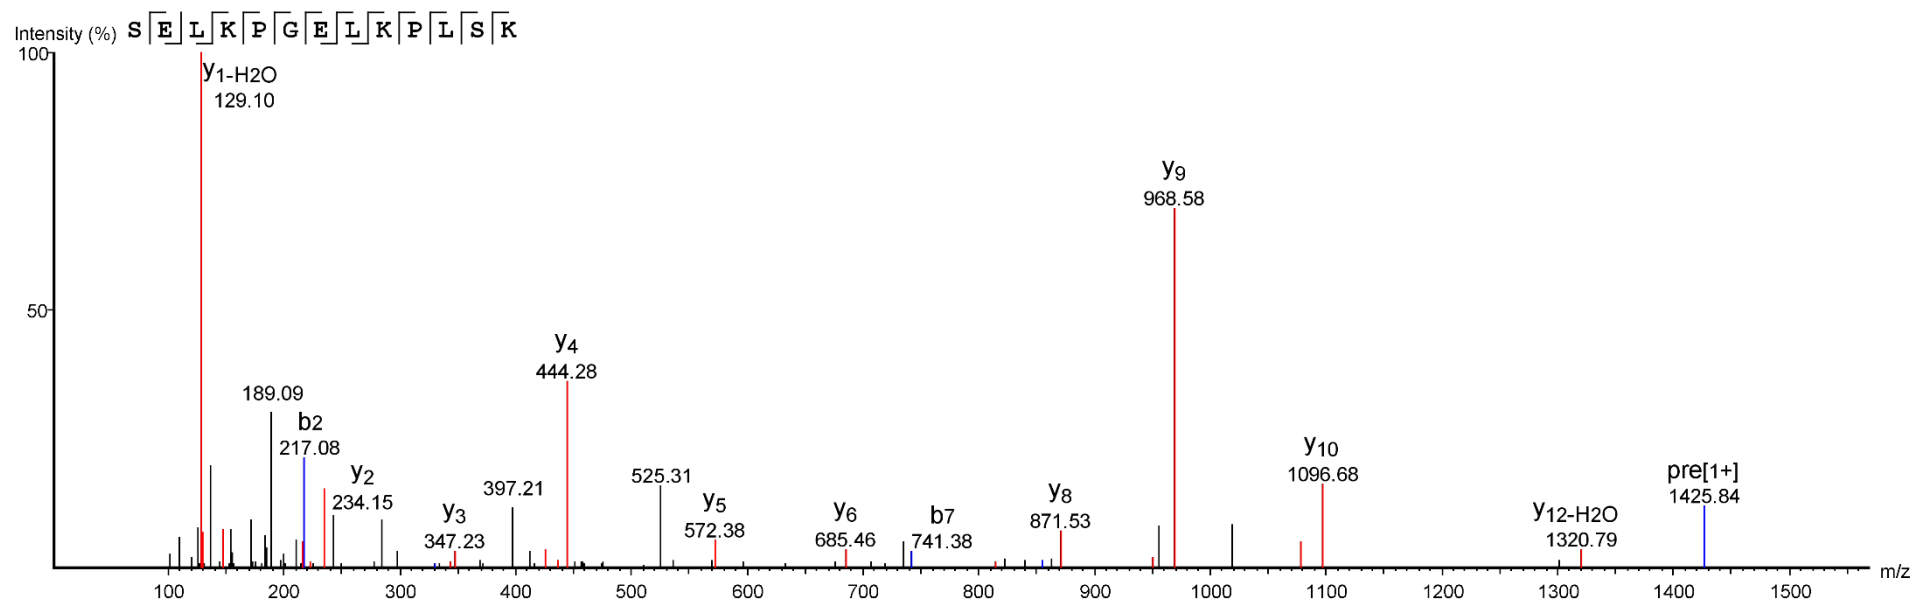

YMT48

Scan #6889

A-267: TELO2<sub>(362-377)</sub>: AVLIC(+57.02)LAQLGEP<sup>L</sup>ELRR

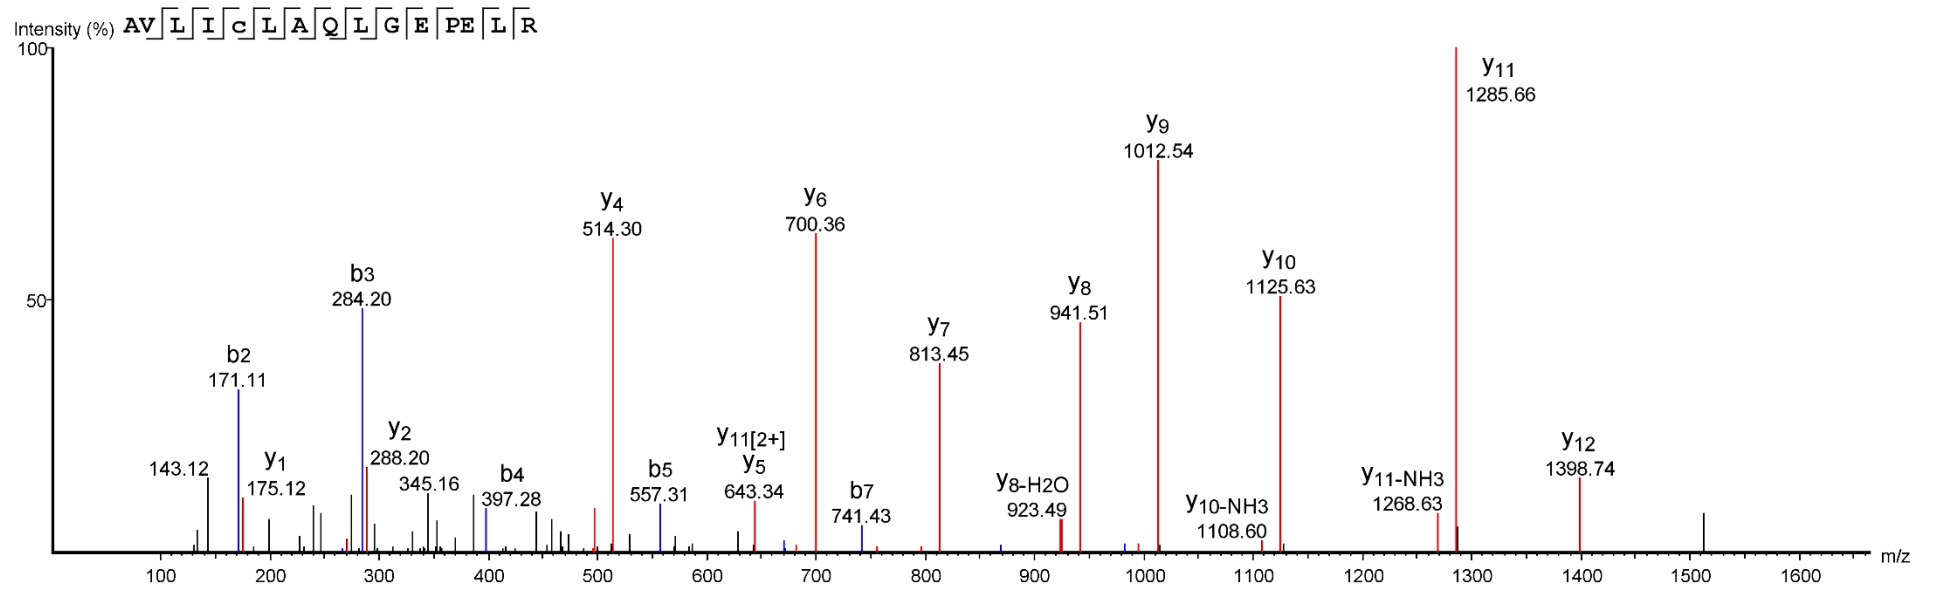

Pep11  
Scan #18513

A-268: TELQ<sub>(362-377)</sub>: AVLIC(+57.02)LAQLGEP(+15.99)ELRR

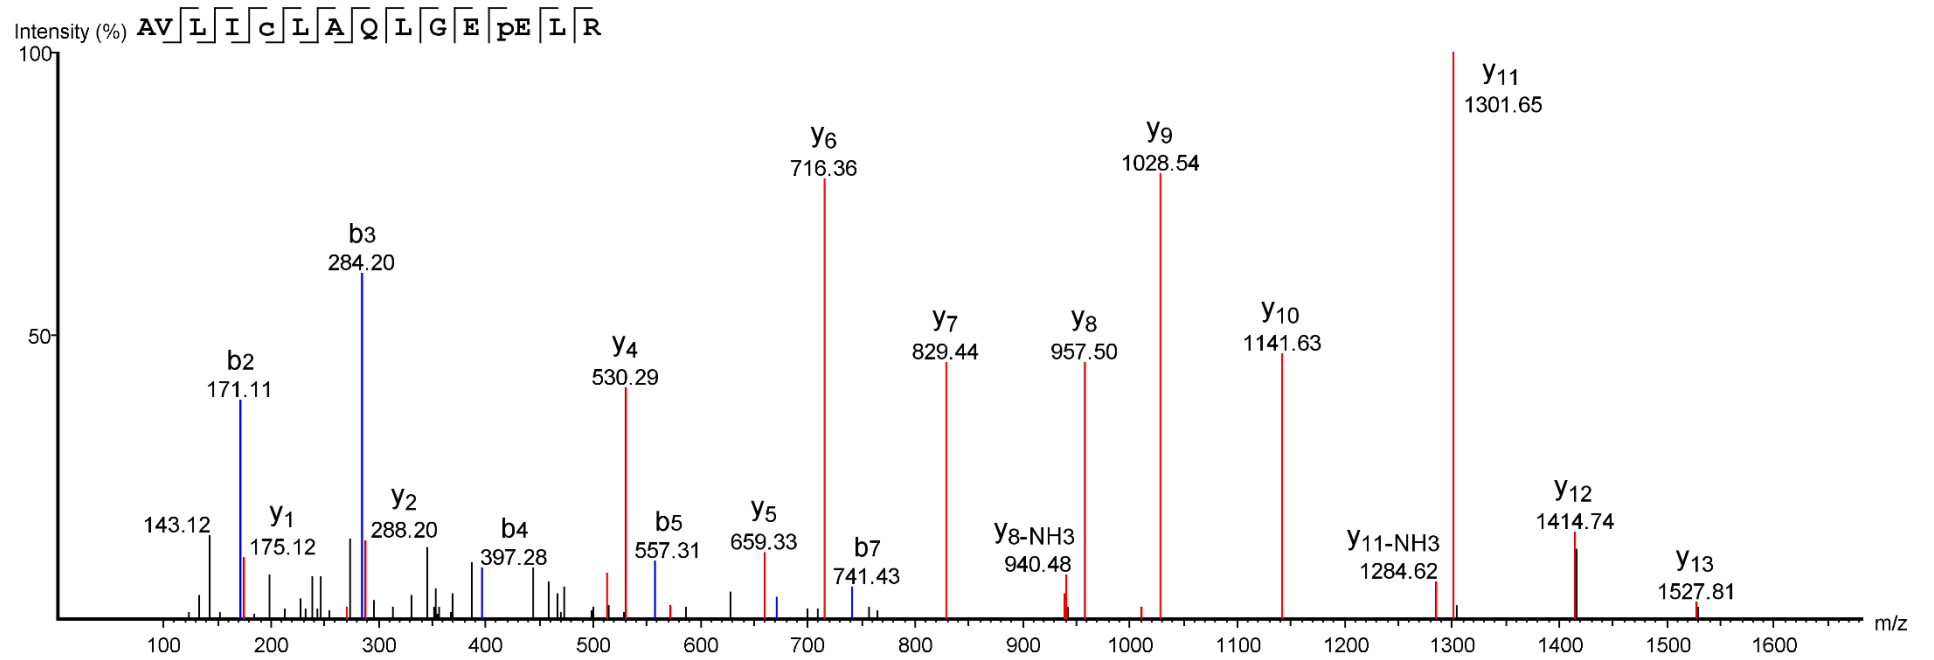

Pep11

Scan #17748



A-269: TELO2<sub>(362-377)</sub>: AVLIC(+57.02)LAQLGEP<sup>E</sup>ELRR

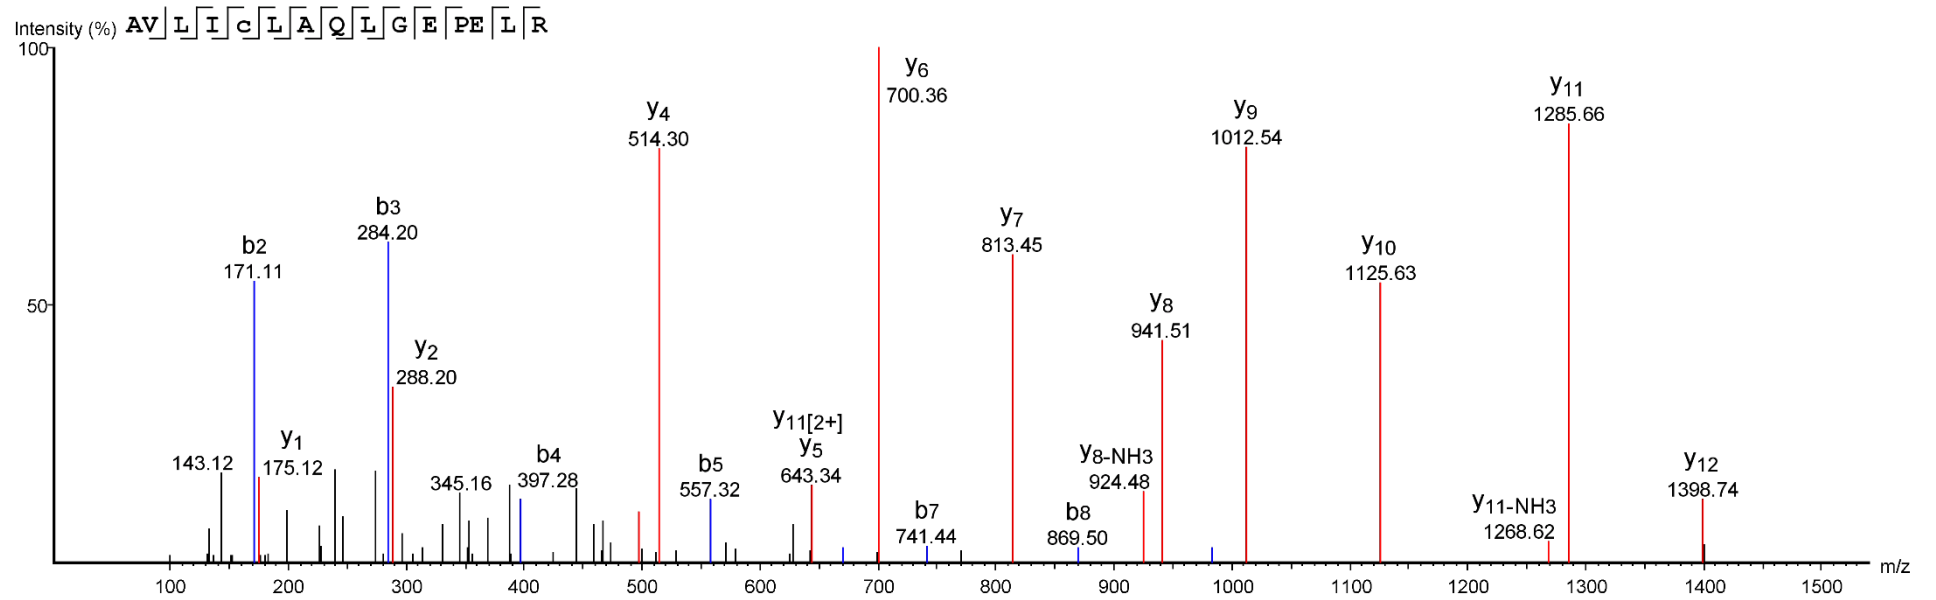

YMT47

Scan #18415

A-270: TELO2<sub>(362-377)</sub>: AVLIC(+57.02)LAQLGEP<sup>E</sup>LR

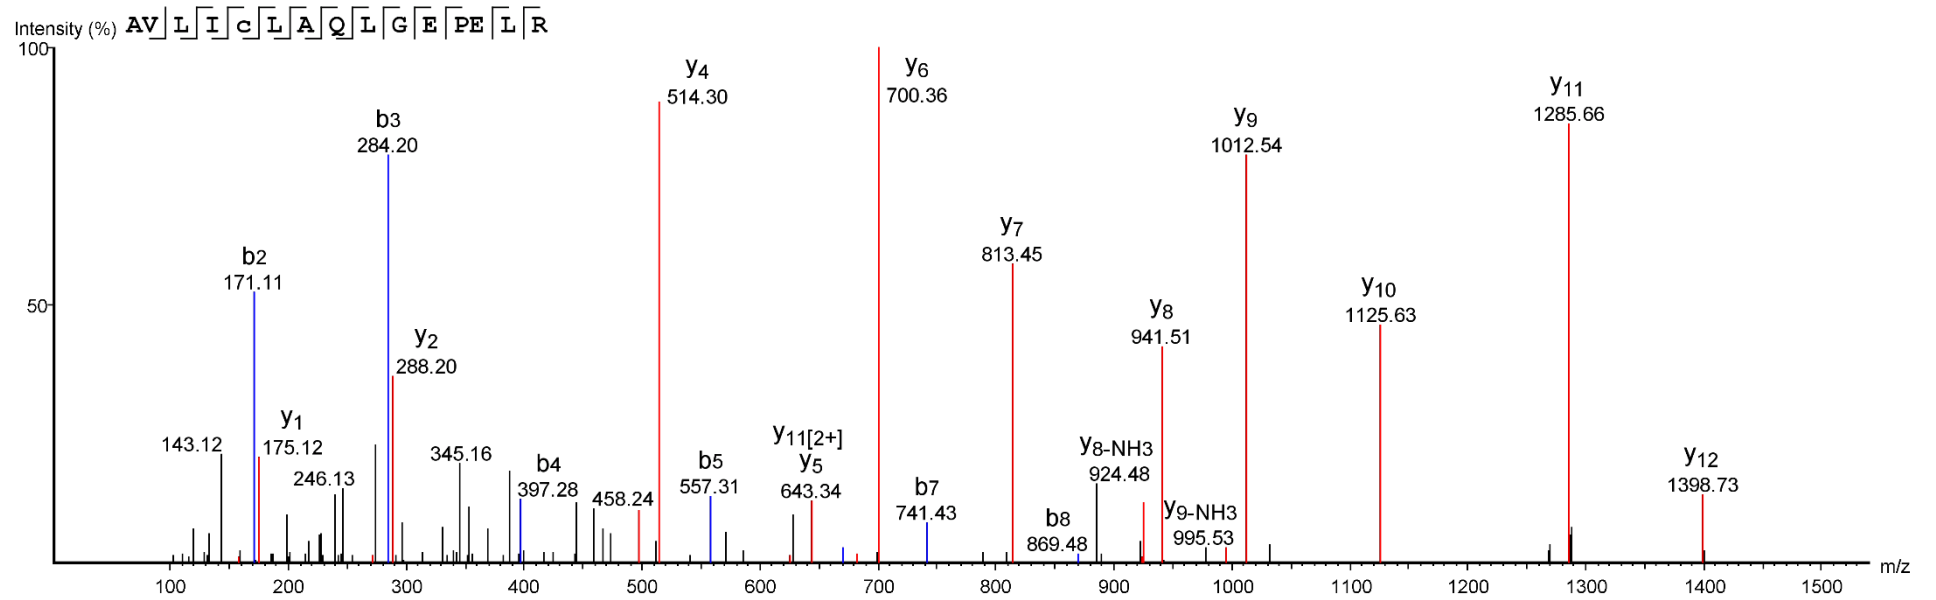

YMT48

Scan #19915

A-271: THRA<sub>(153-176)</sub>: SLOQRPEPTPEEWDLIHIATEAHR

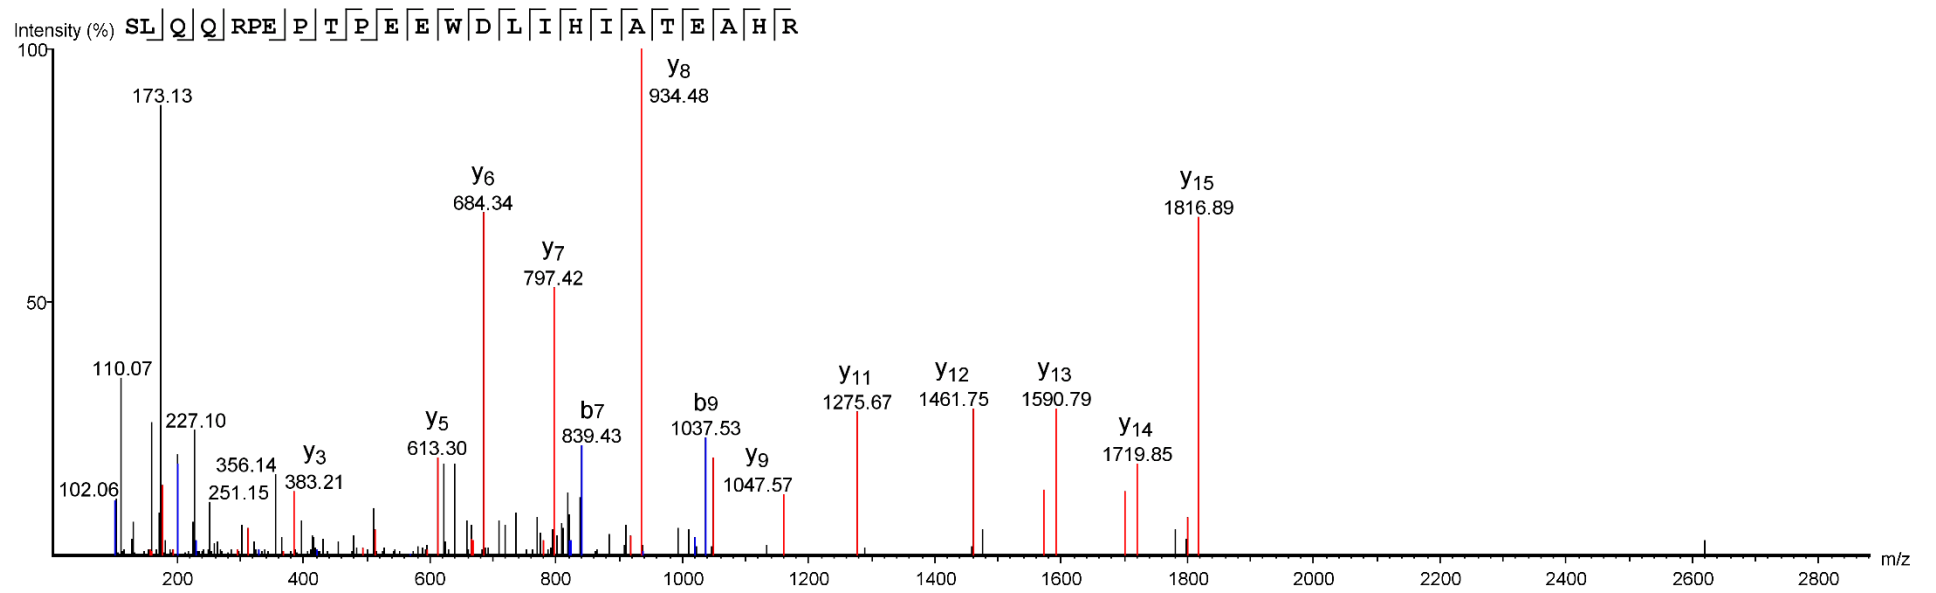

Pep21

Scan #11851

A-272: THRA<sub>(153-176)</sub>: SLQQRPEP(+15.99)TPEEWDLIHIA TEAHR

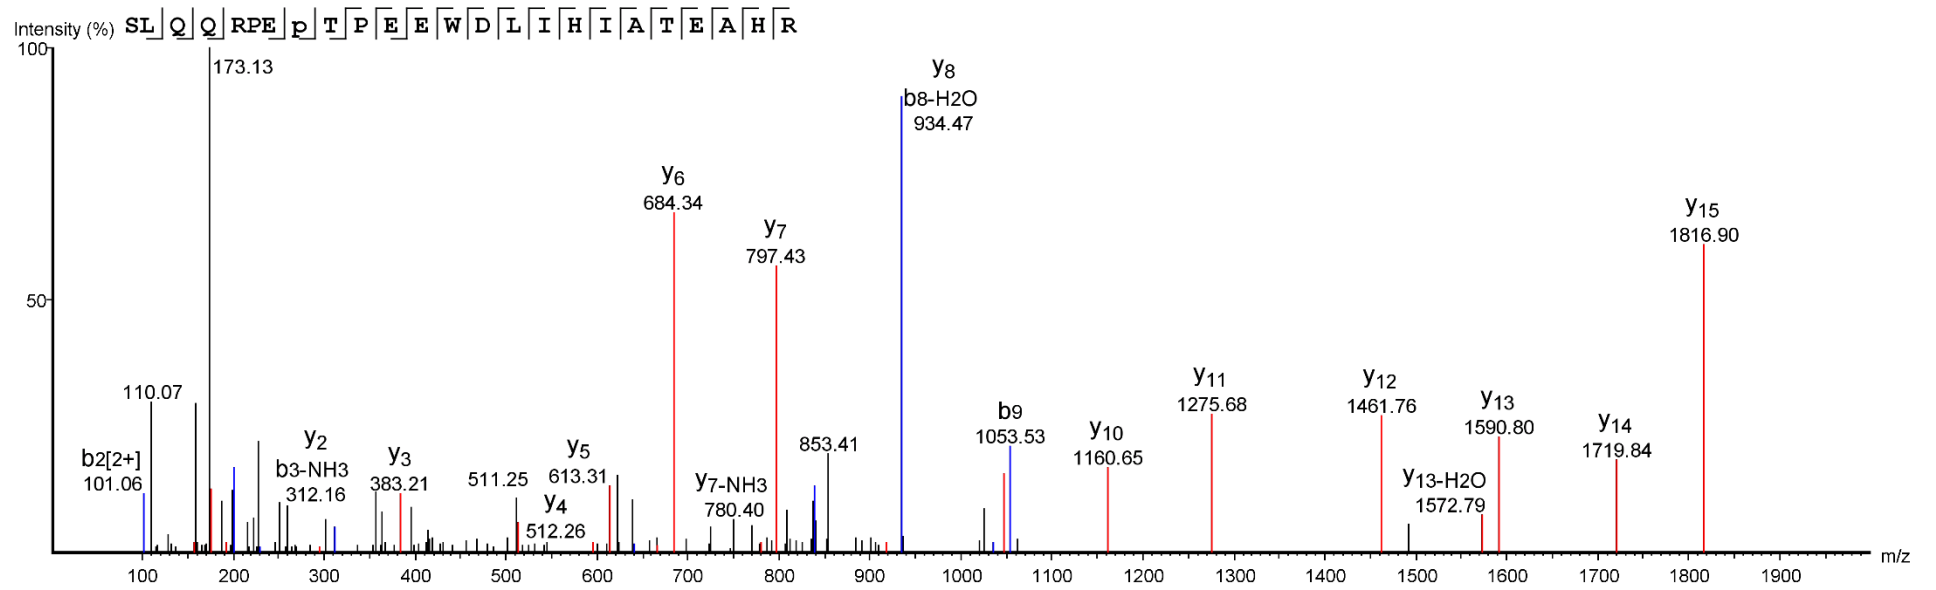

Pep21

Scan #11112

A-273: THRA<sub>(153-176)</sub>: SLQQRPEPTPEEWDLIHIA TEAHR

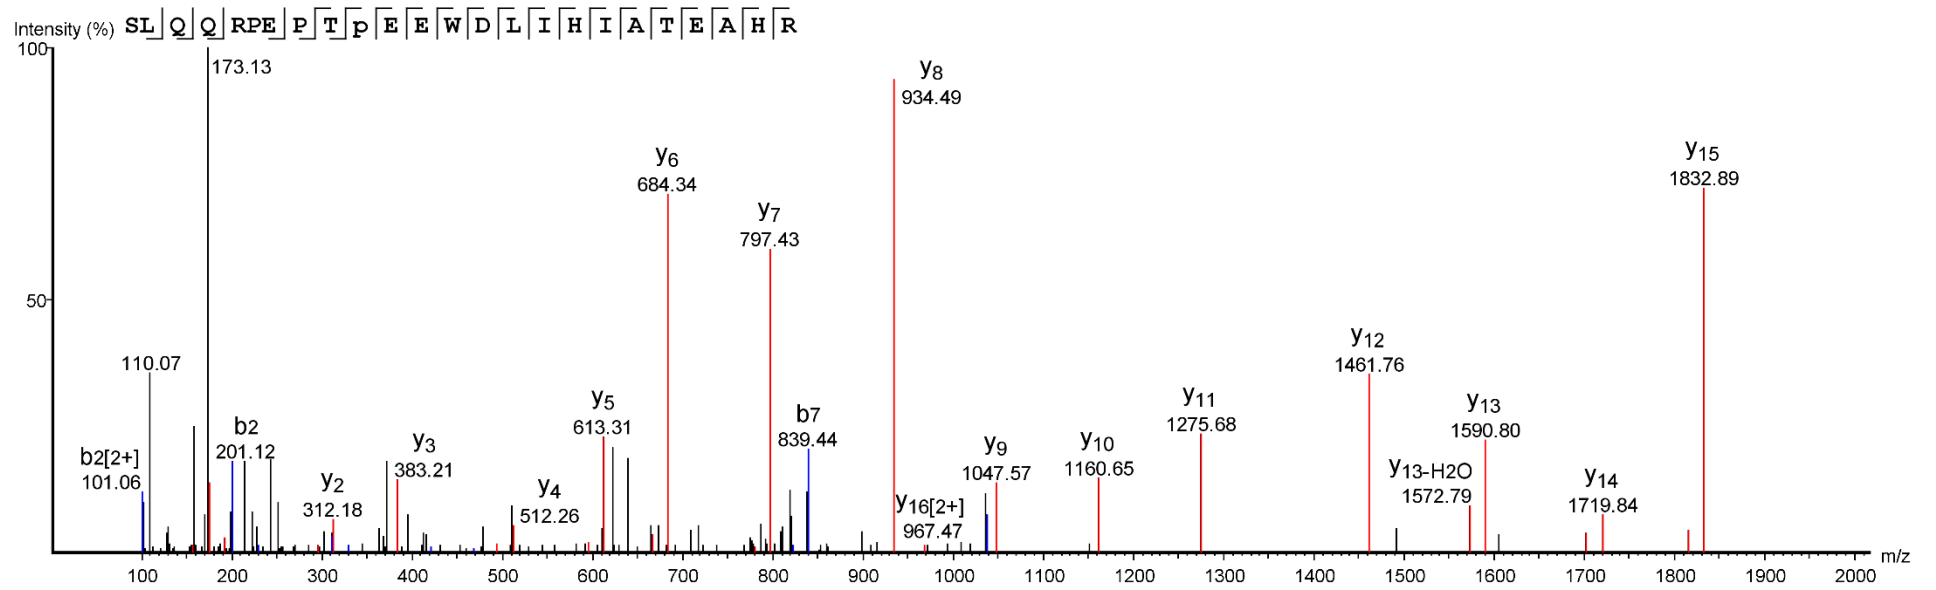

Pep21

Scan #11848

A-274: THRA<sub>(153-176)</sub>: SLQQRPEP(+15.99)TP(+15.99)EEWDLIHIA TEAHR

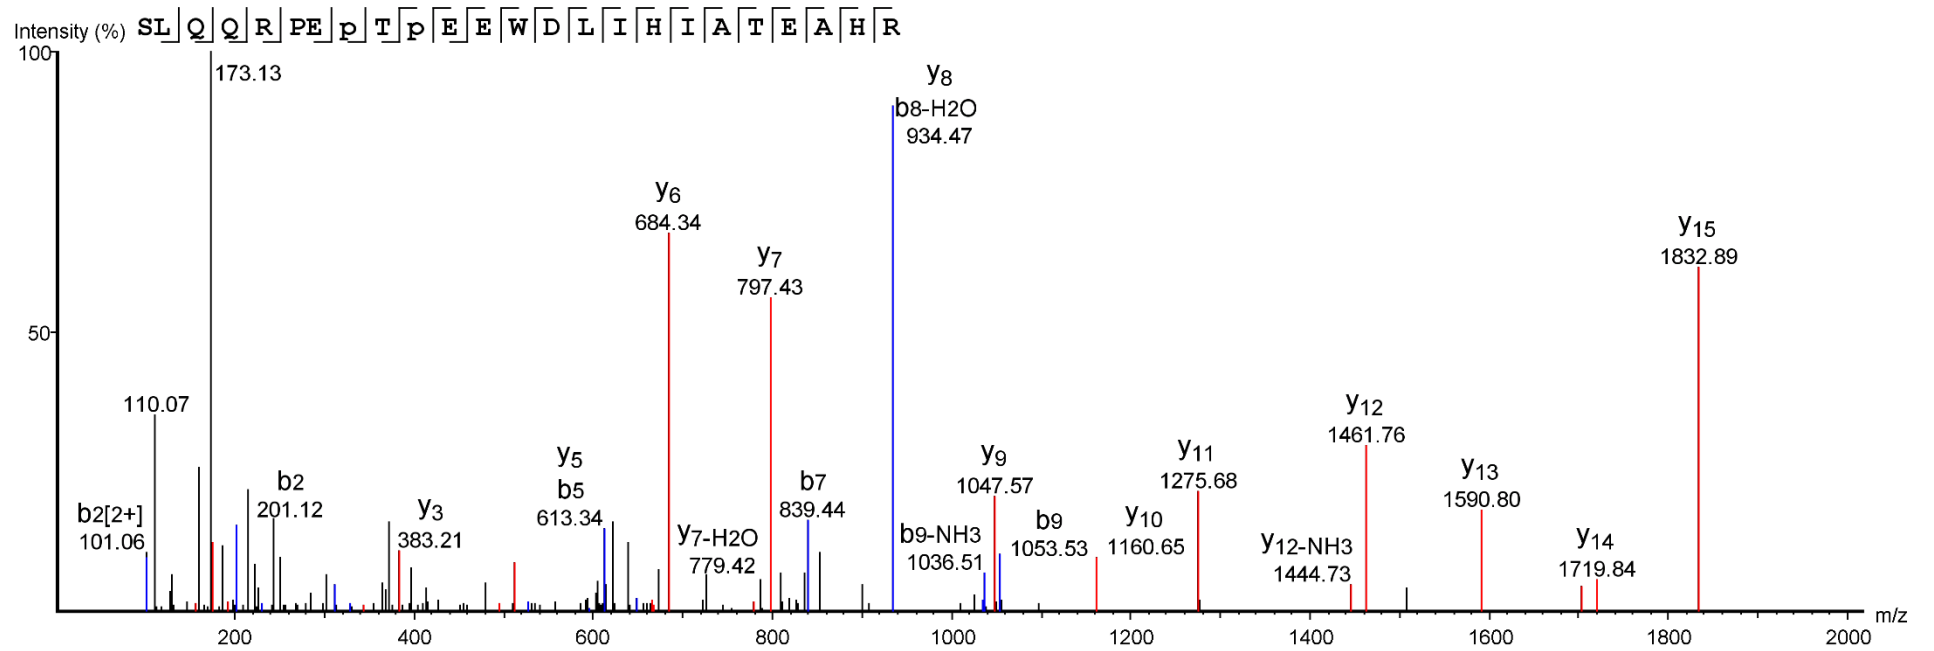

Pep21  
Scan #10760

A-275: AKT1<sub>(308-328)</sub>: TFC(+57.02)GTPEYLAPEVLENDNDYGR

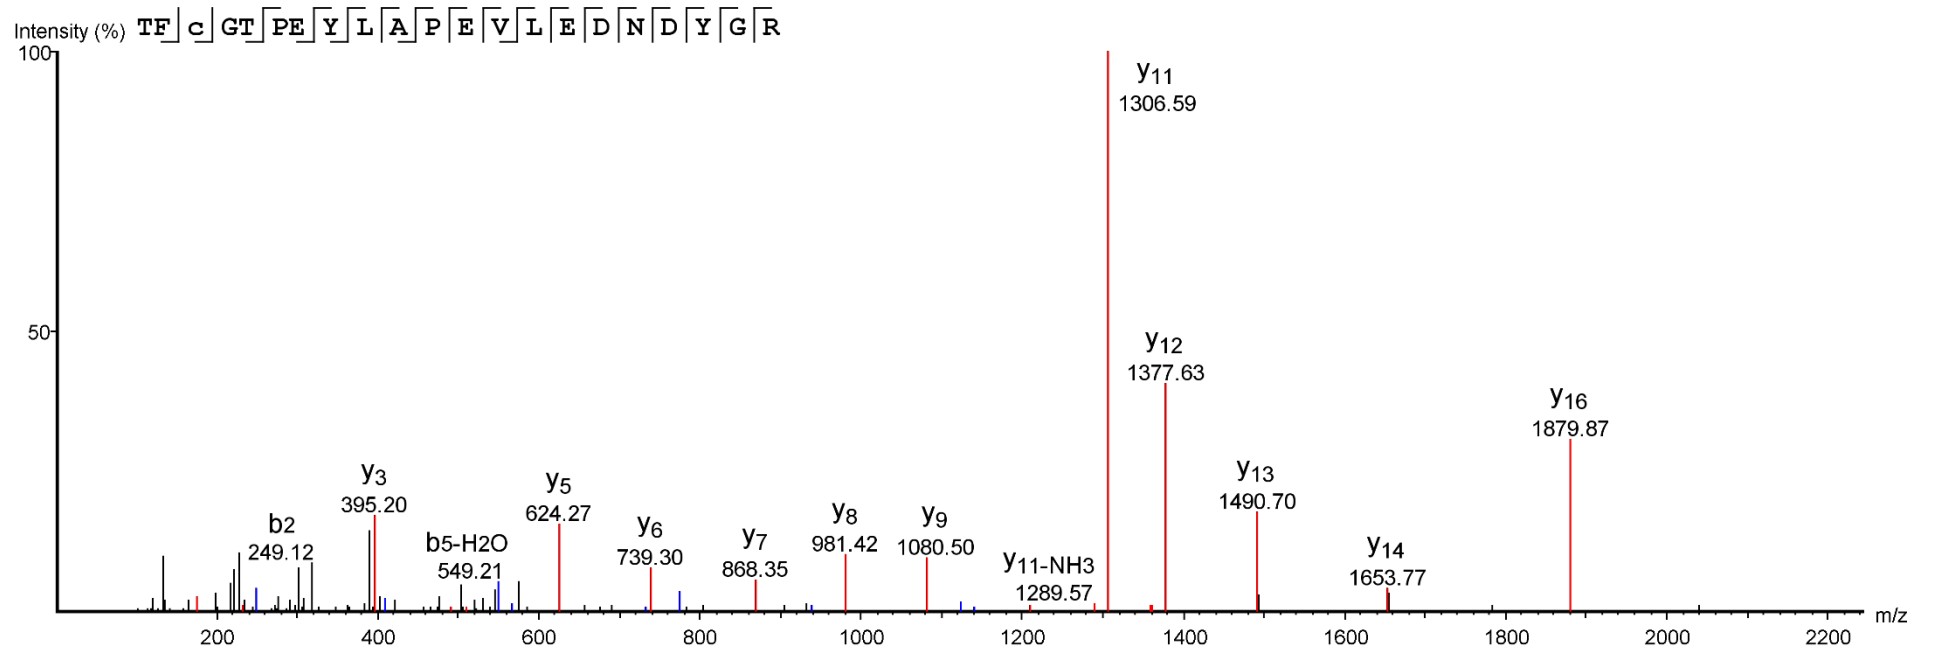

YMT83

Scan #21196

A-276: AKT1<sub>(308-328)</sub>: TFC(+57.02)GTPEYLAPEVLEDNNDYGR

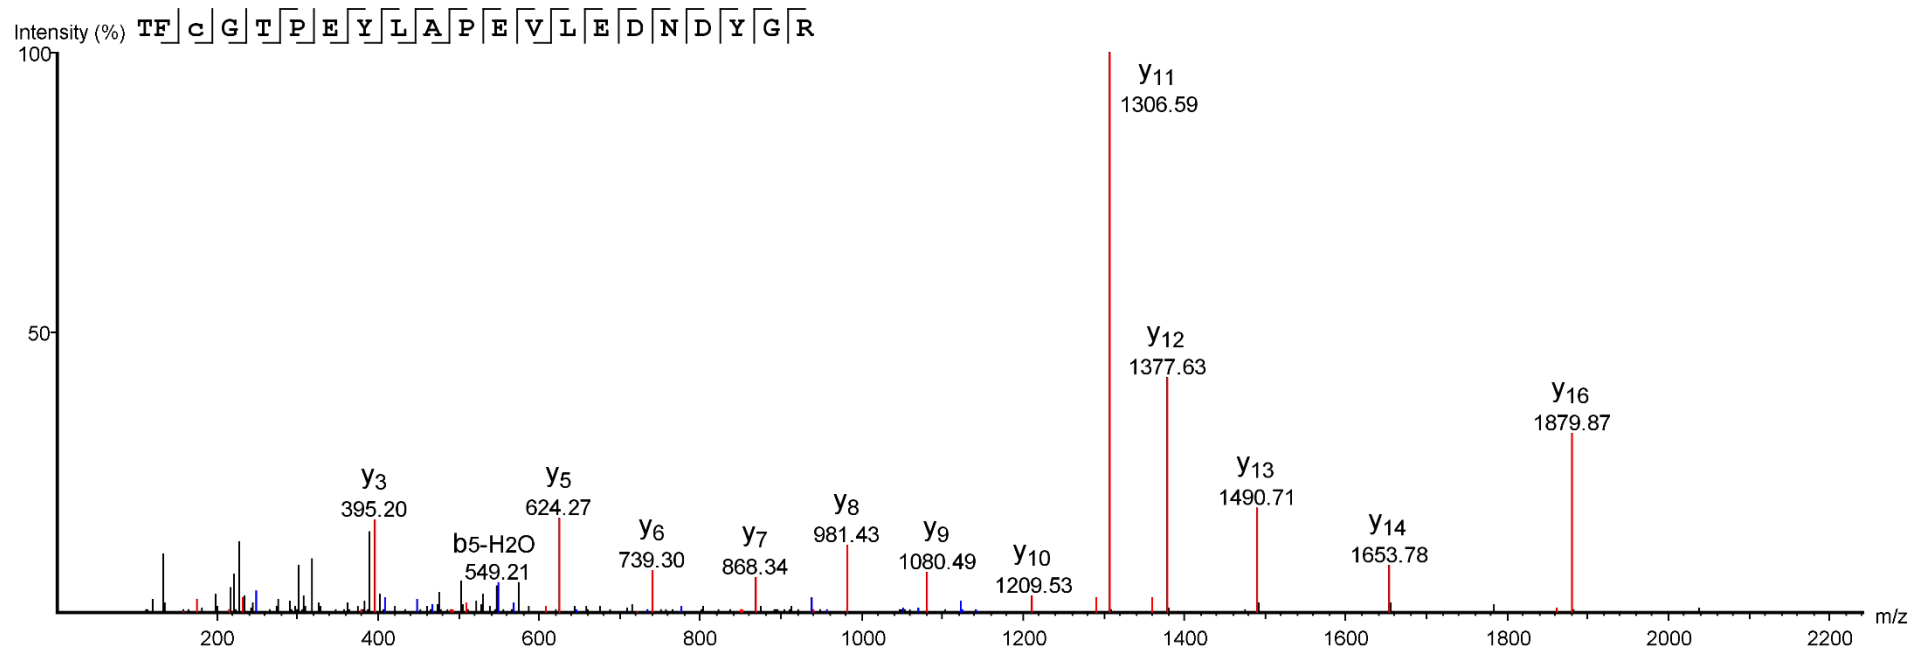

YMT84

Scan #20036



A-277: AKT1<sub>(308-328)</sub>: TFC(+57.02)GTPEY(+15.99)LAPEVLEDNDYGR

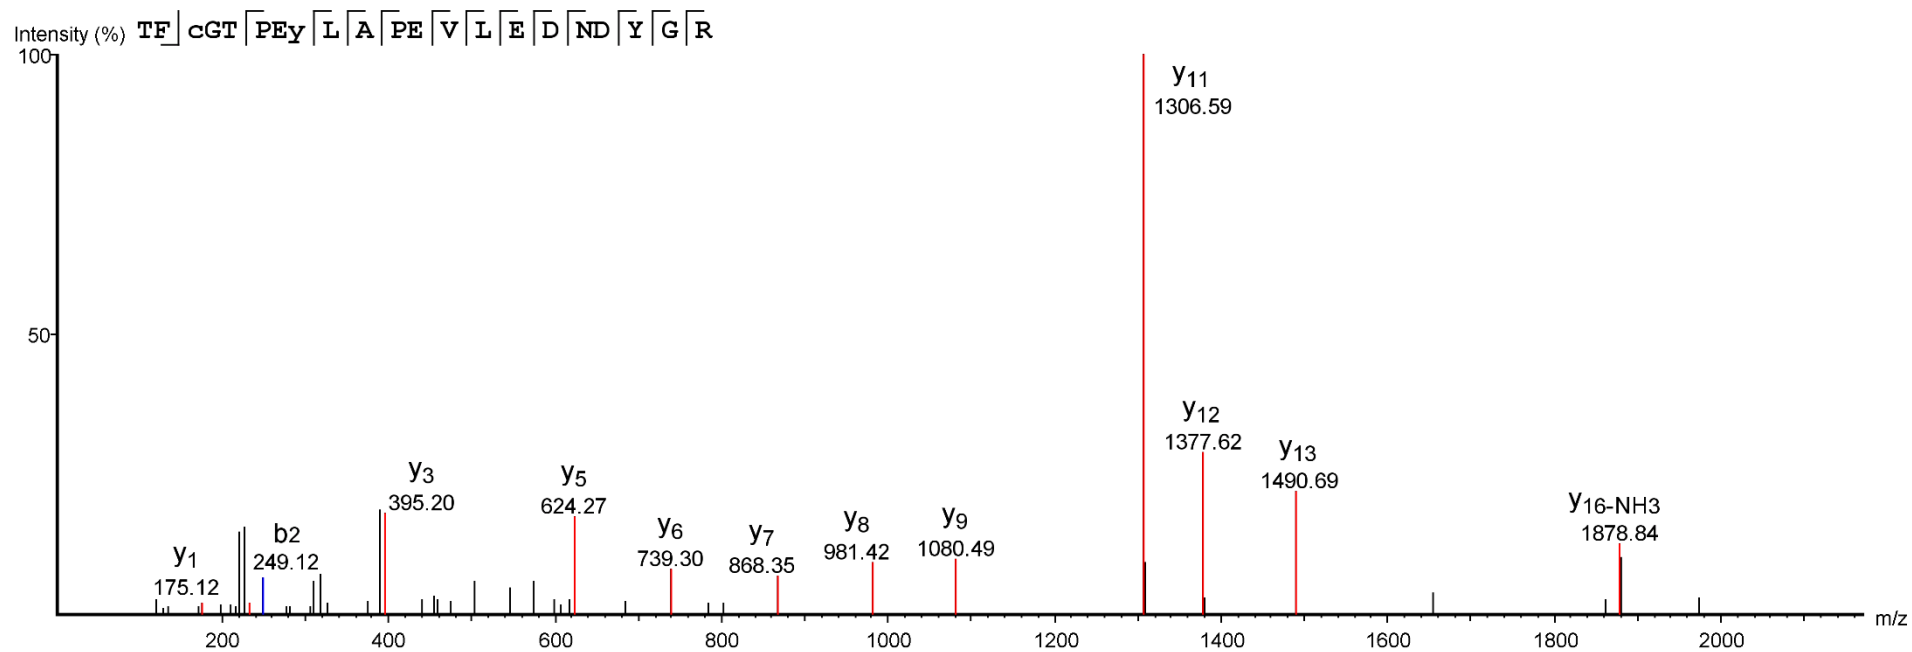

YMT84

Scan #19642

A-282: TP53<sub>(140-156)</sub>: TC(+57.02)PVQLWVDSTPPPGR

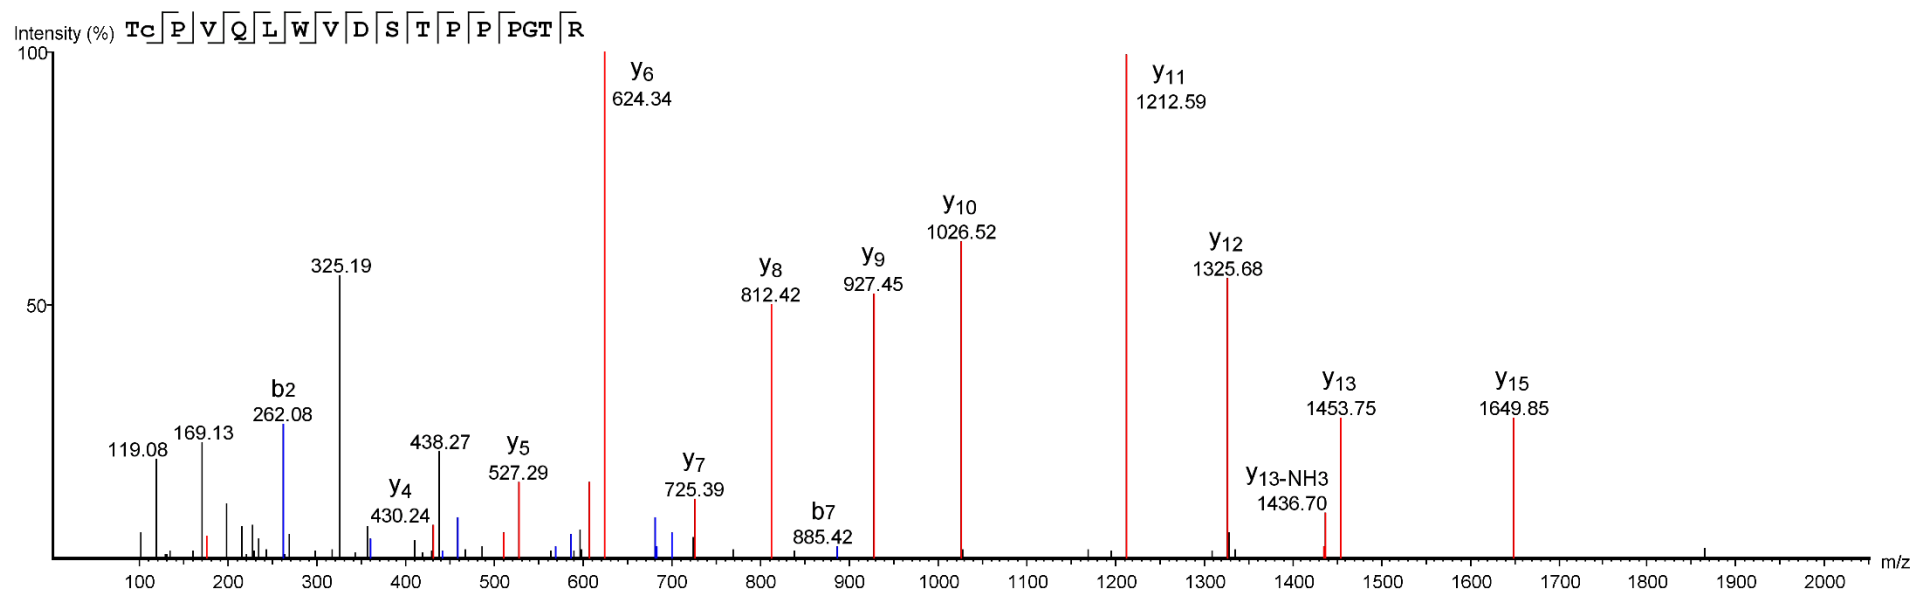

Pep27

Scan #15258

A-283: TP53<sub>(140-156)</sub>: TC(+57.02)P(+15.99)VQLWVDSTPPPGTR

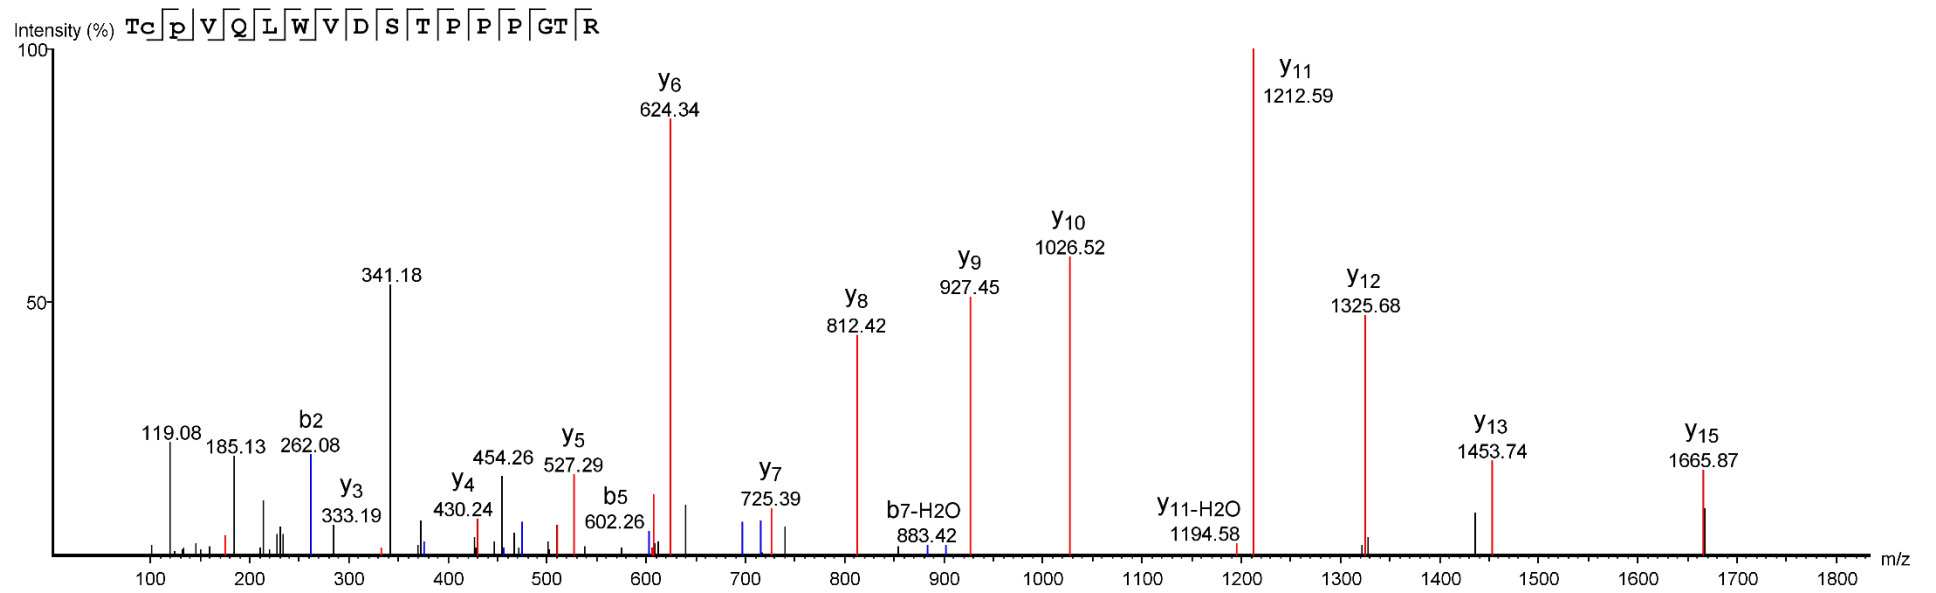

Pep27

Scan #14282

A-284: TP53<sub>(140-156)</sub>: TC(+57.02)PVQLWVDSTPPPGR

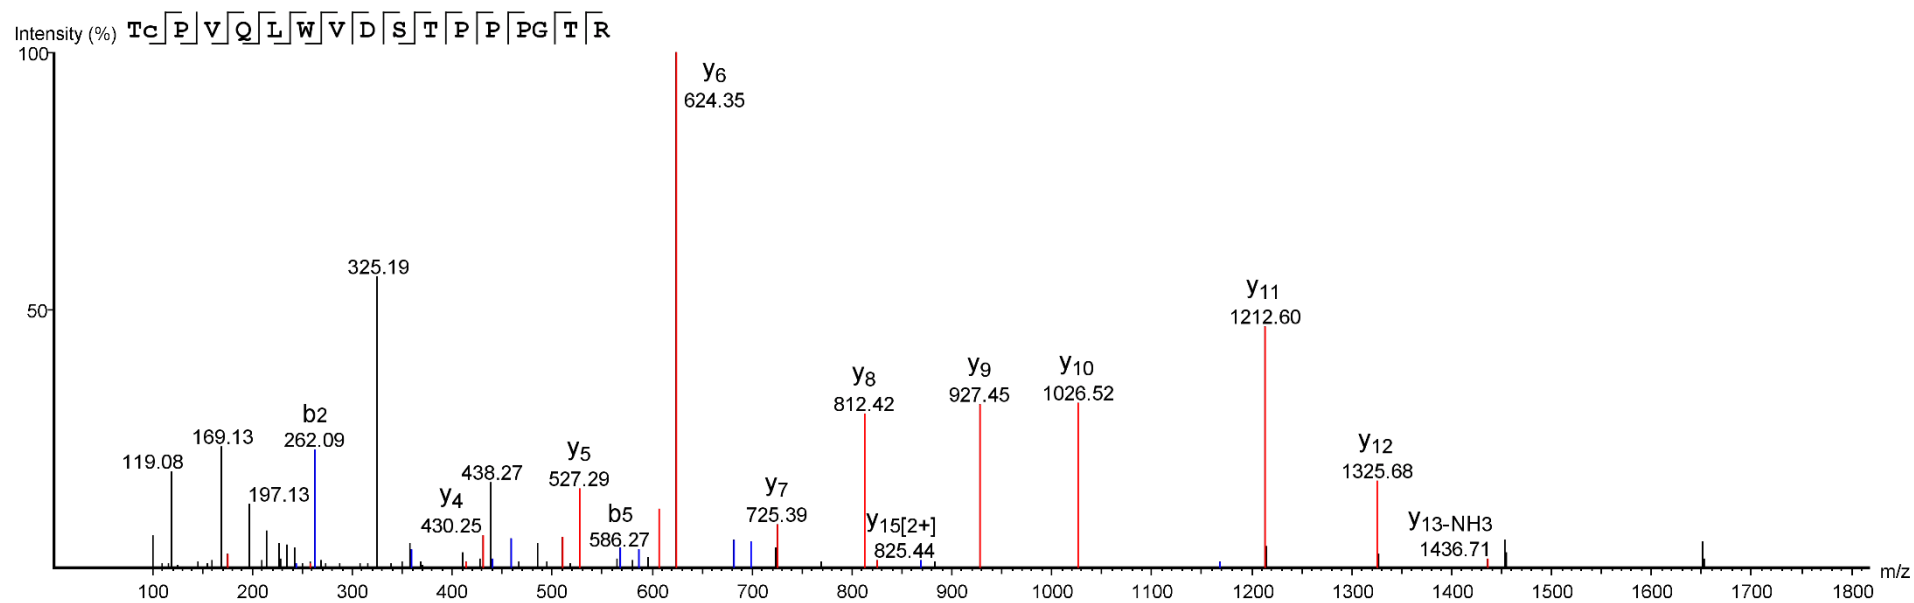

YMT31

Scan #15766

A-285: TP53<sub>(140-156)</sub>: TC(+57.02)PVQLWVDSTPPPGTR

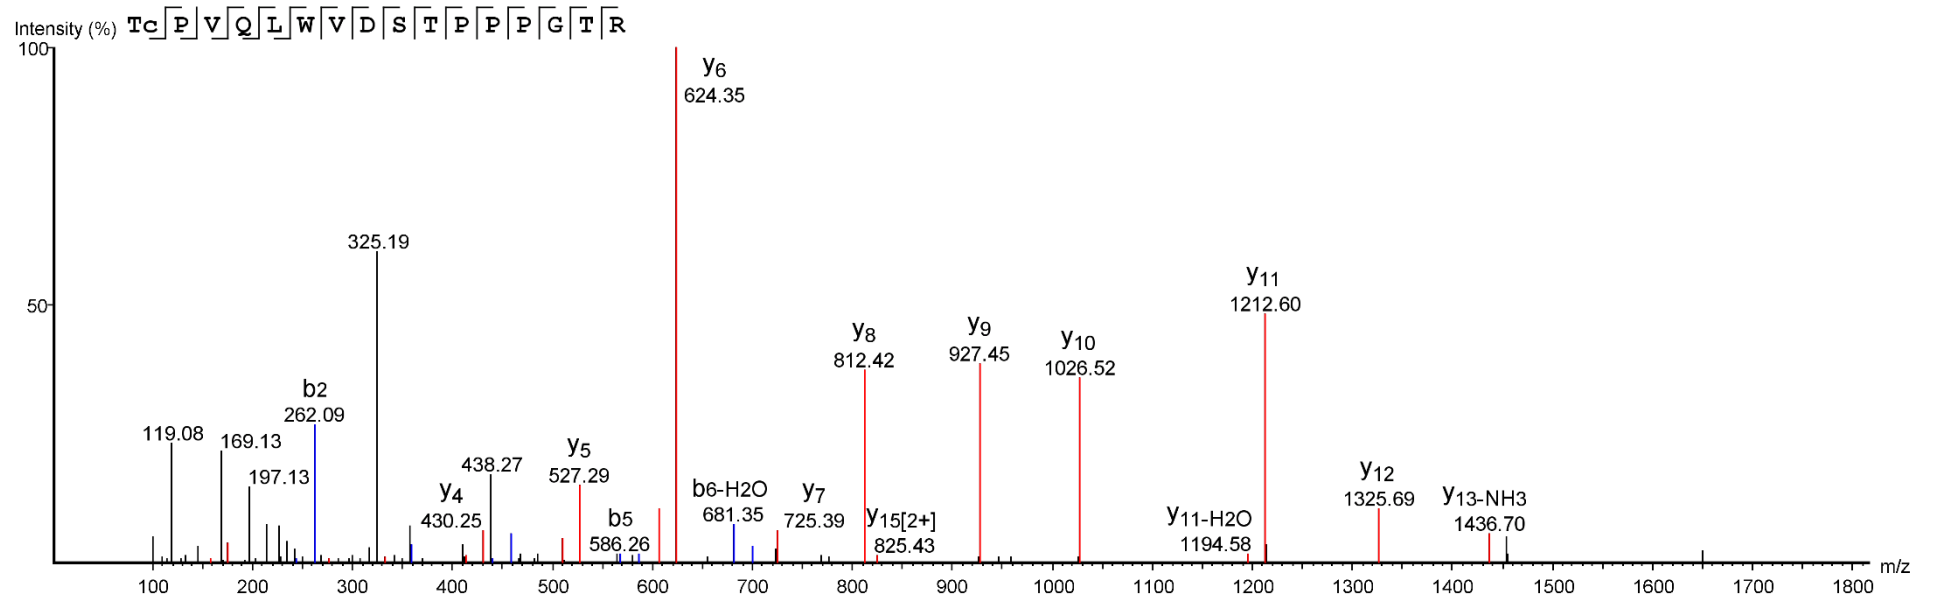

YMT32

Scan #16700

A-286: TRPA1<sub>(391-403)</sub>: NLRPEFMQMQQIQIK+

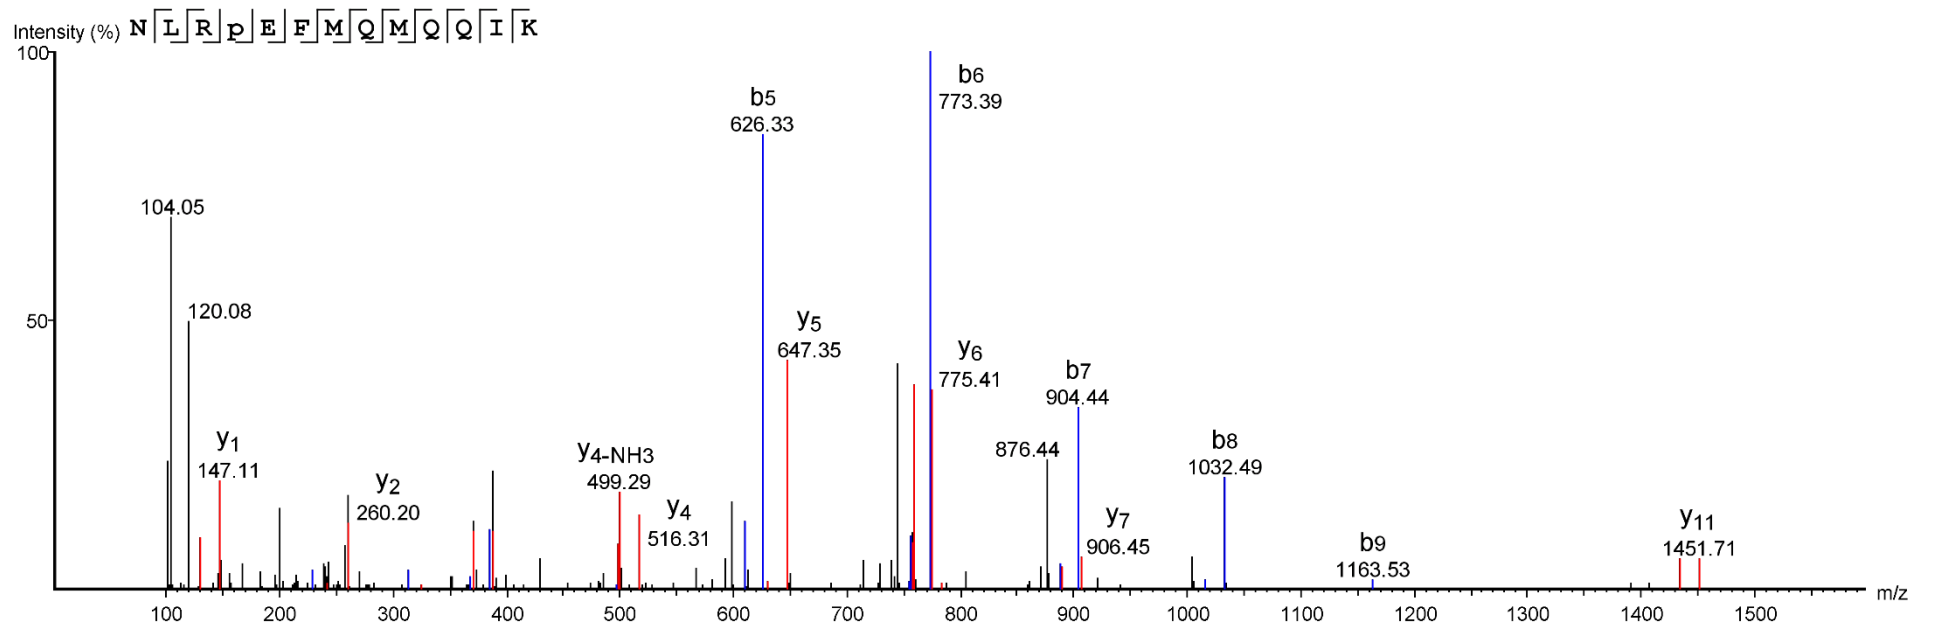

Pep11

Scan #11445

A-287: TRPA1<sub>(391-403)</sub>: NLRP(+15.99)EFMQMQQIK+

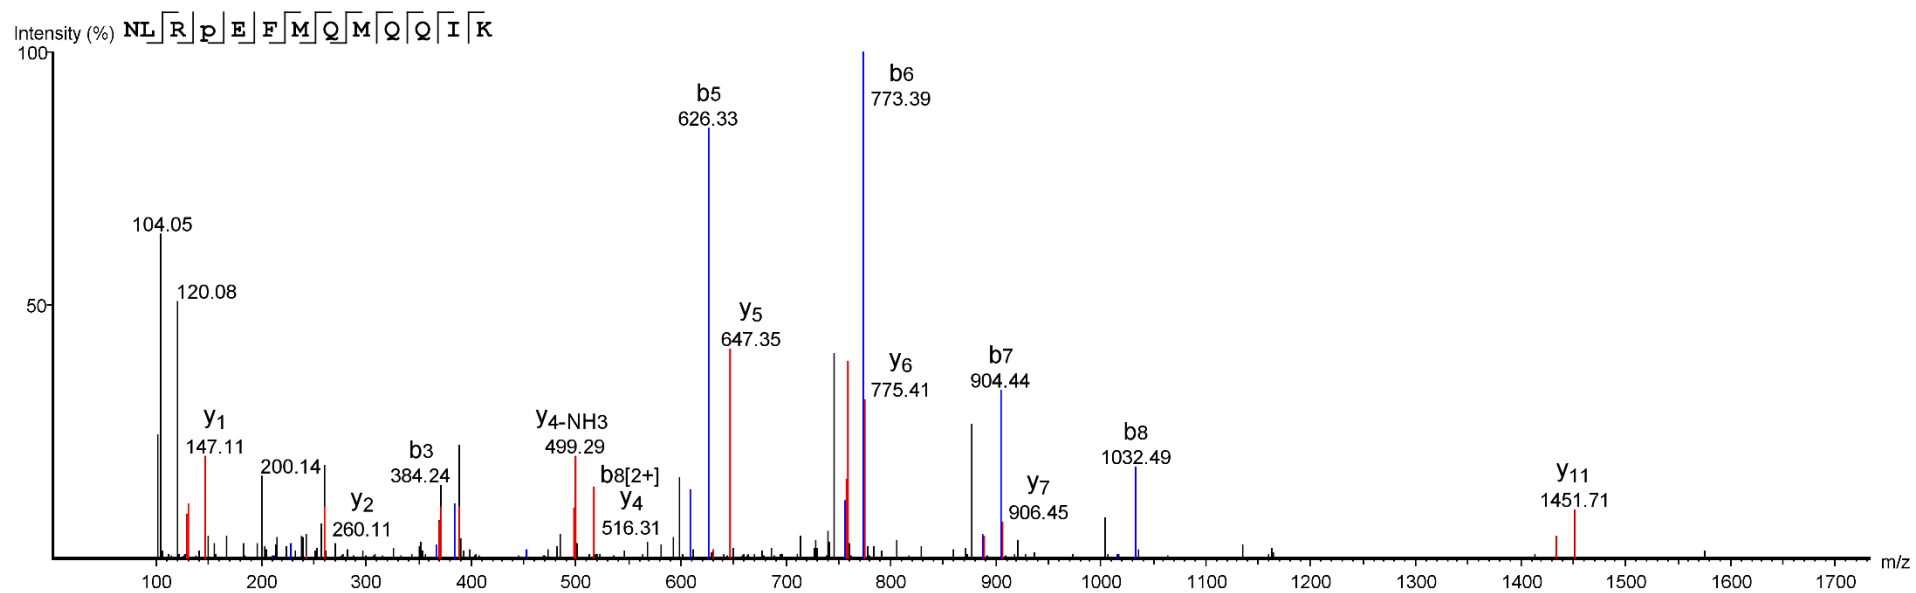

Pep11

Scan #10230

A-288: TRPA1<sub>(391-403)</sub>: NLRPEFM(+15.99)QMQQIK+

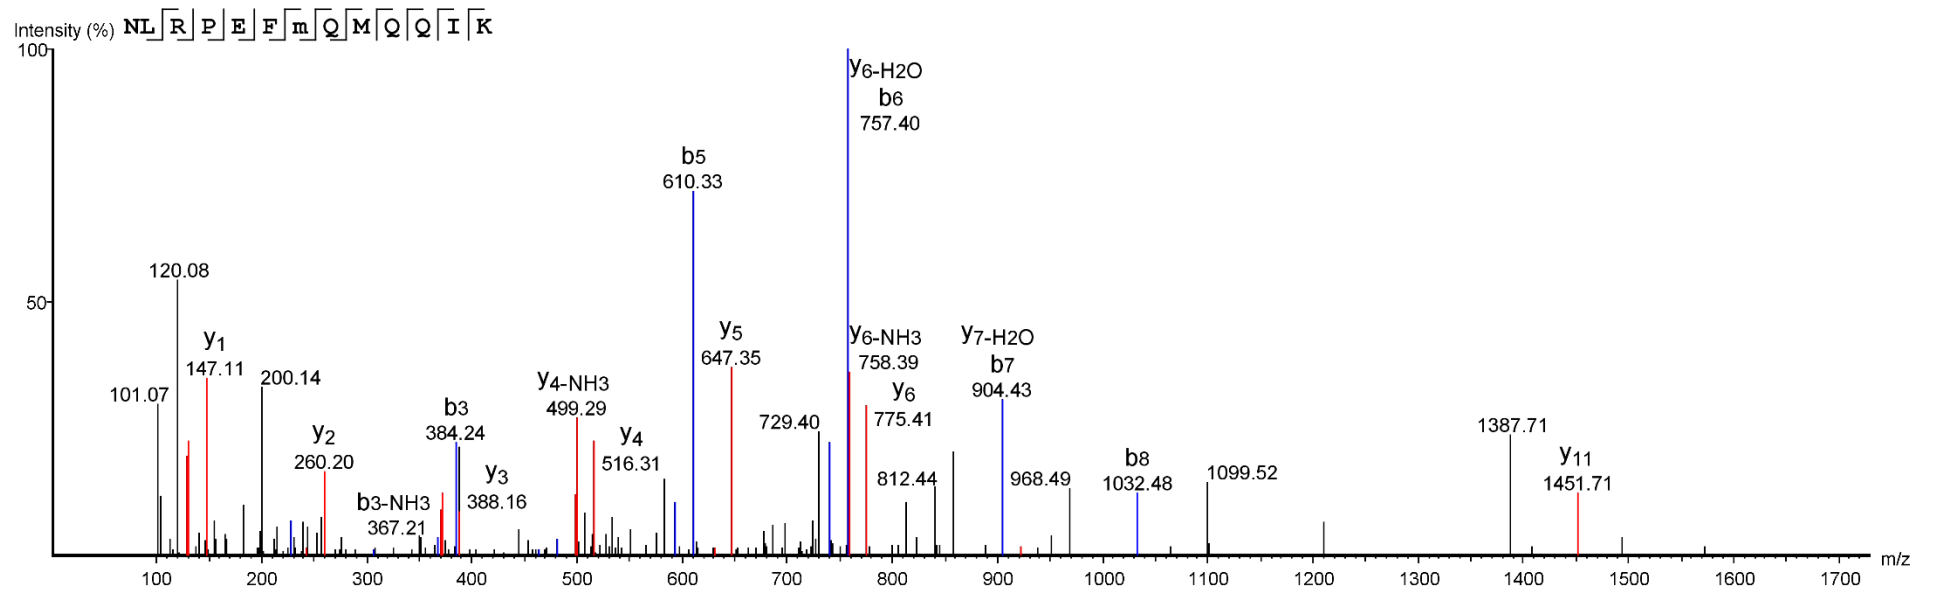

Pep11

Scan #9429



A-289: TRPA1<sub>(391-403)</sub>: NLRPEFMQM(+15.99)QQIK+

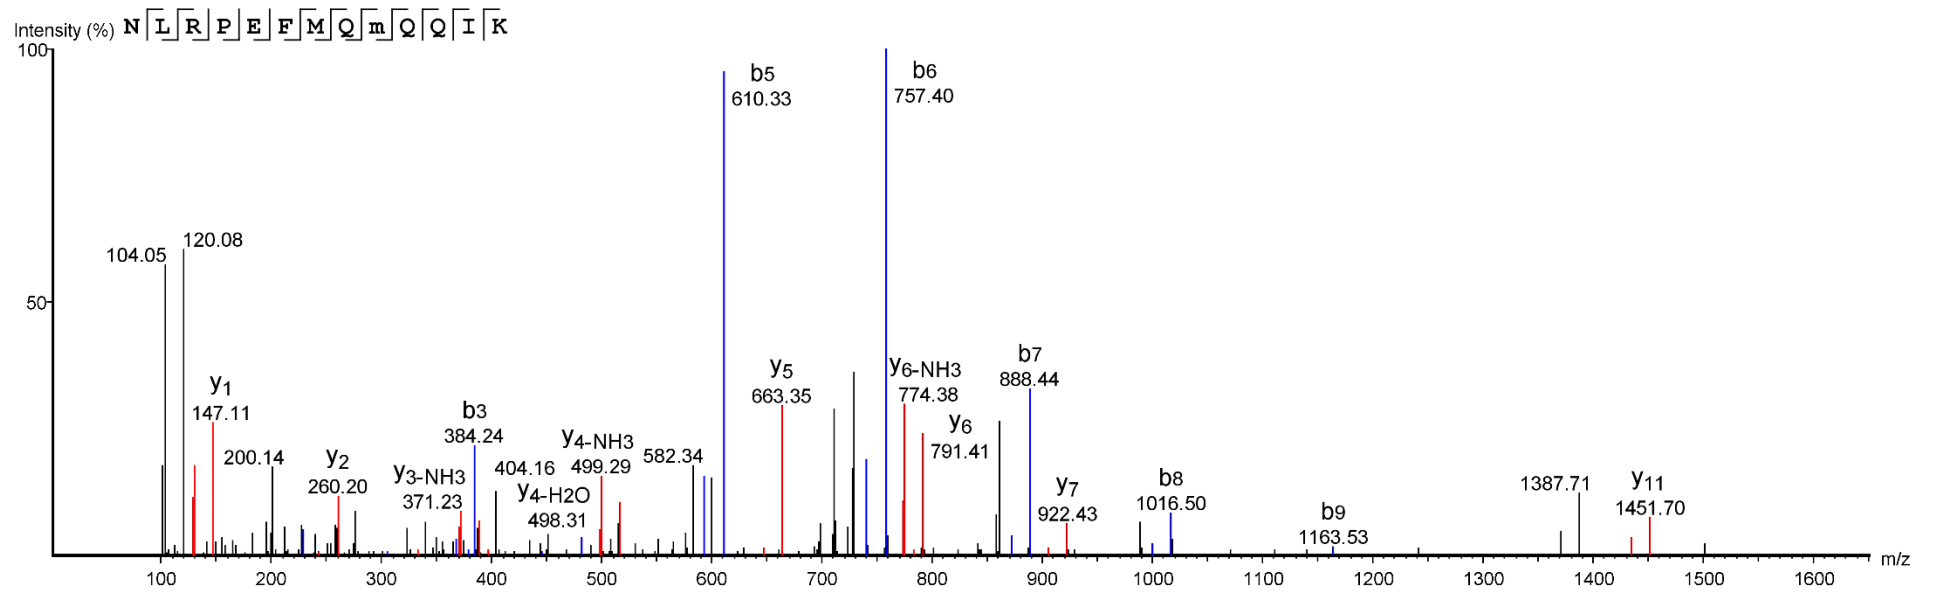

Pep11  
Scan #9045

A-290: TRPA1<sub>(391-403)</sub>: NLRP(+15.99)EFM(+15.99)QMQQIK+

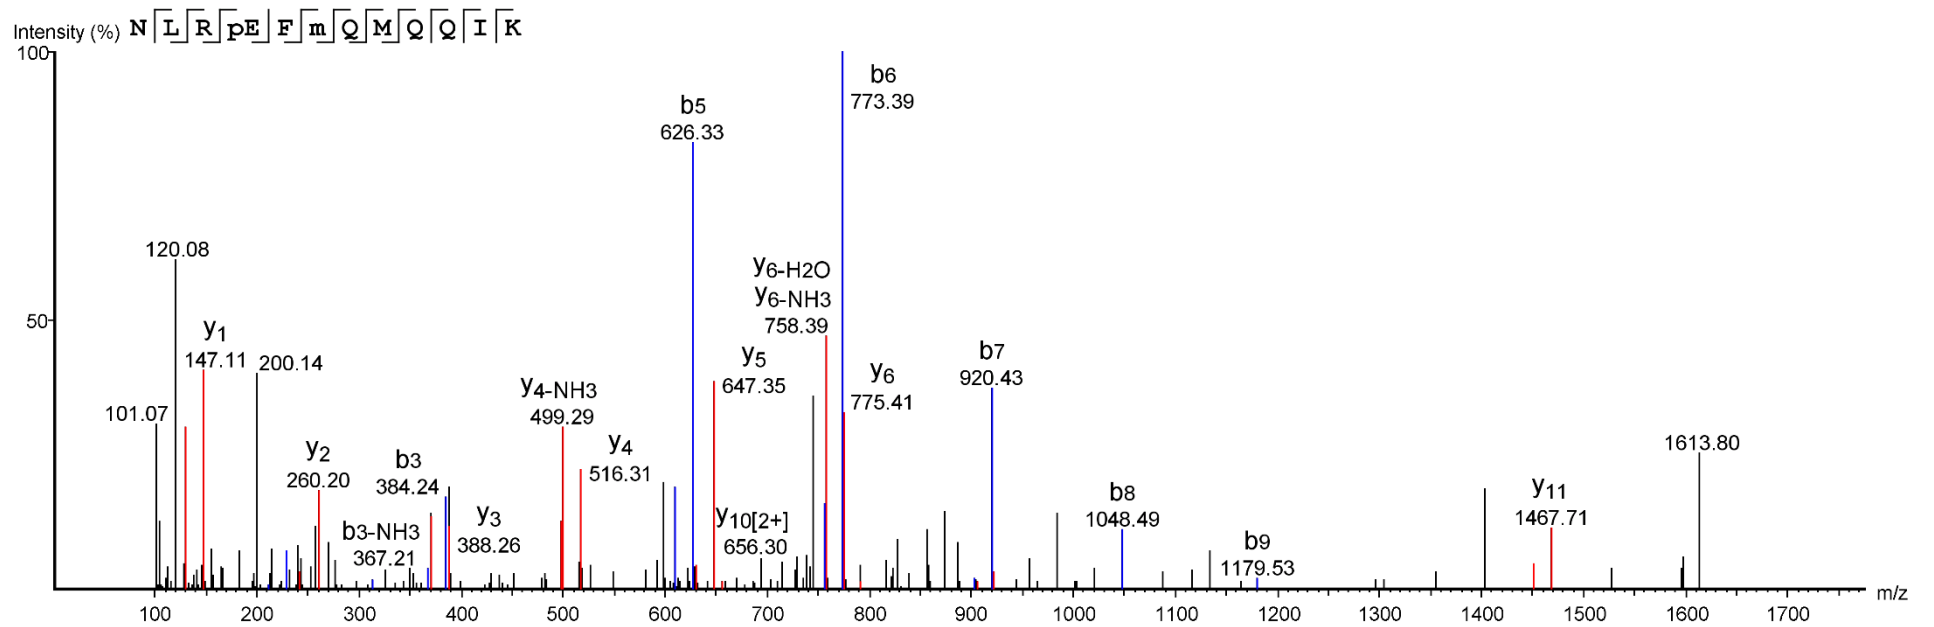

Pep11  
Scan #8710

A-291: TRPA1<sub>(391-403)</sub>: NLRP(+15.99)EFMQM(+15.99)QQIK+

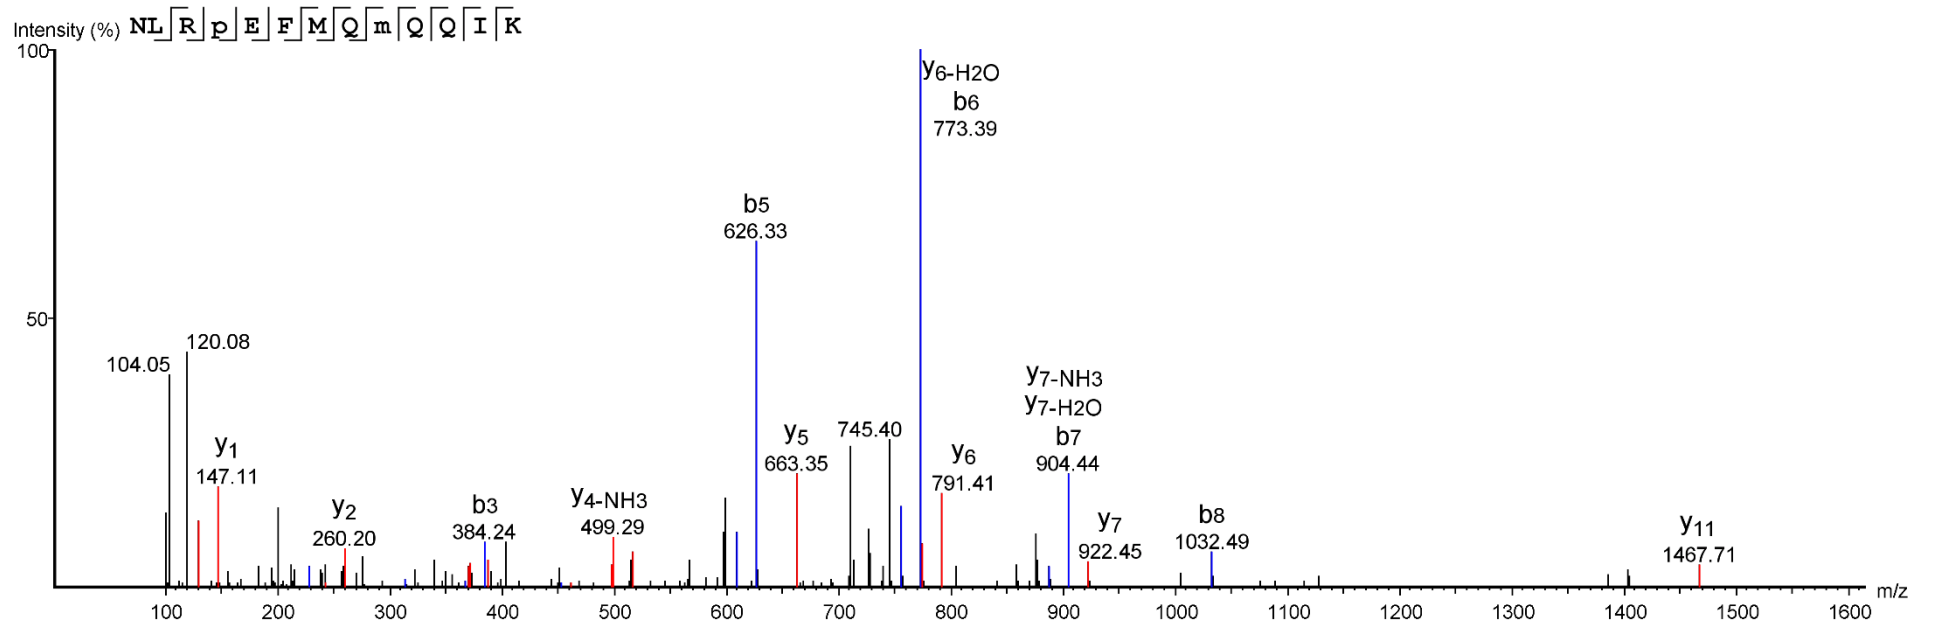

Pep11  
Scan #7718

A-292: TRPA1<sub>(391-403)</sub>: NLRPEFM(+15.99)QM(+15.99)QIQIK+

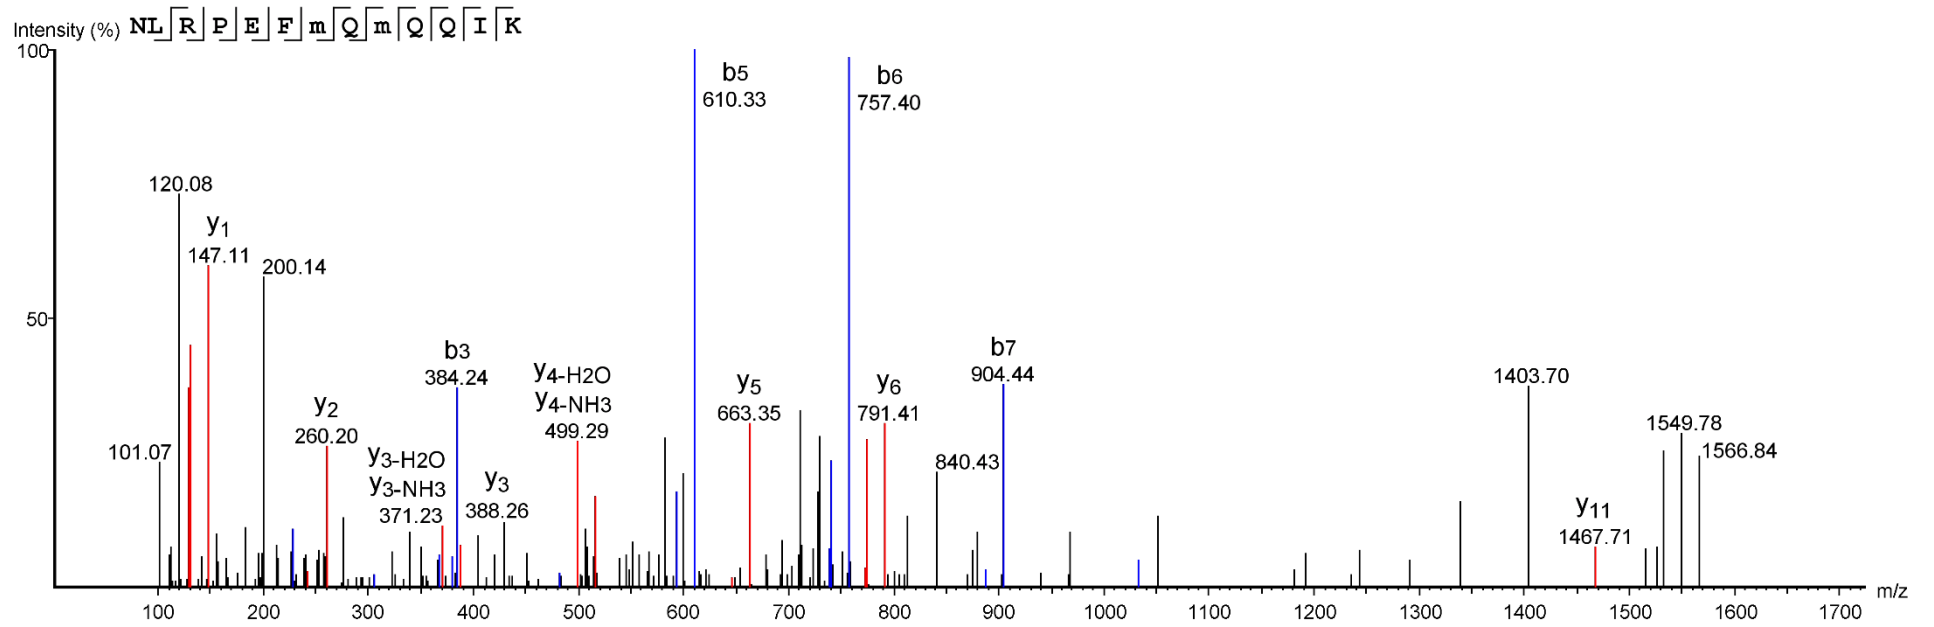

Pep11  
Scan #7112

A-293: TRPA1<sub>(391-403)</sub>: NLRP(+15.99)EFM(+15.99)QM(+15.99)QQIK+

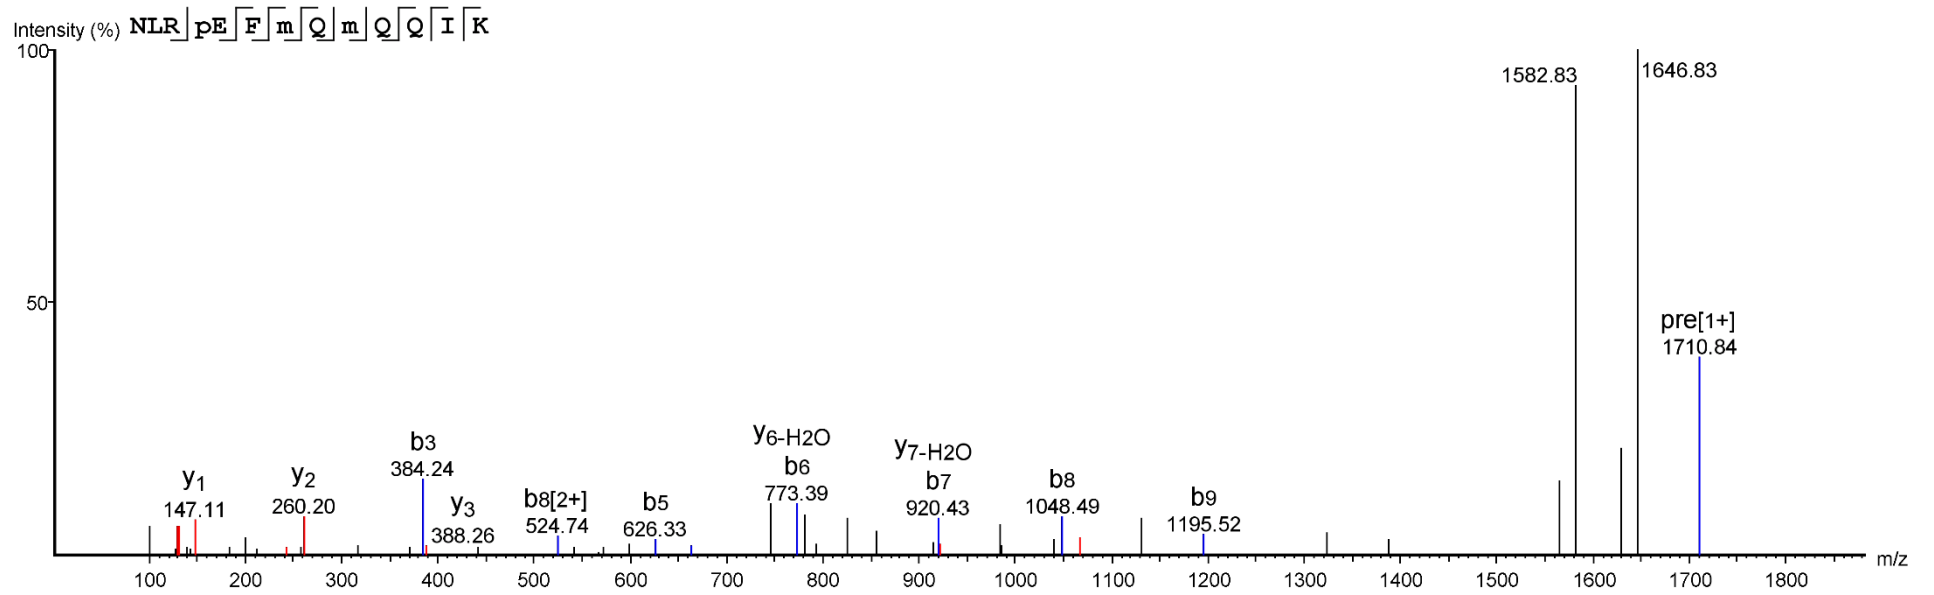

Pep11

Scan #6087

A-294: TRPA1<sub>(391-403)</sub>: NLRPEFMQM~~Q~~QIQK+

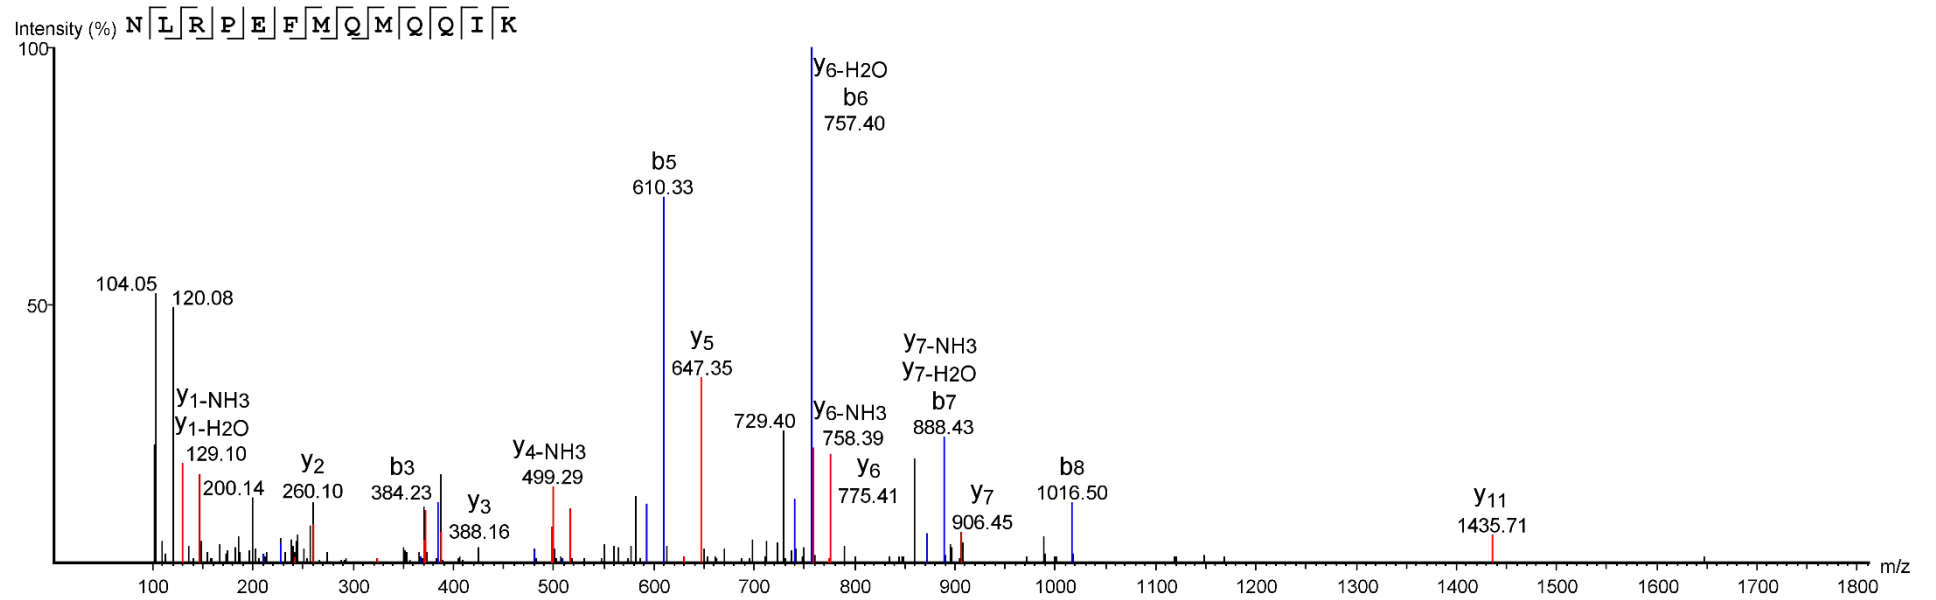

YMT71

Scan #11288

A-295: TRPA1<sub>(391-403)</sub>: NLRPEFMQM~~Q~~IQIK+

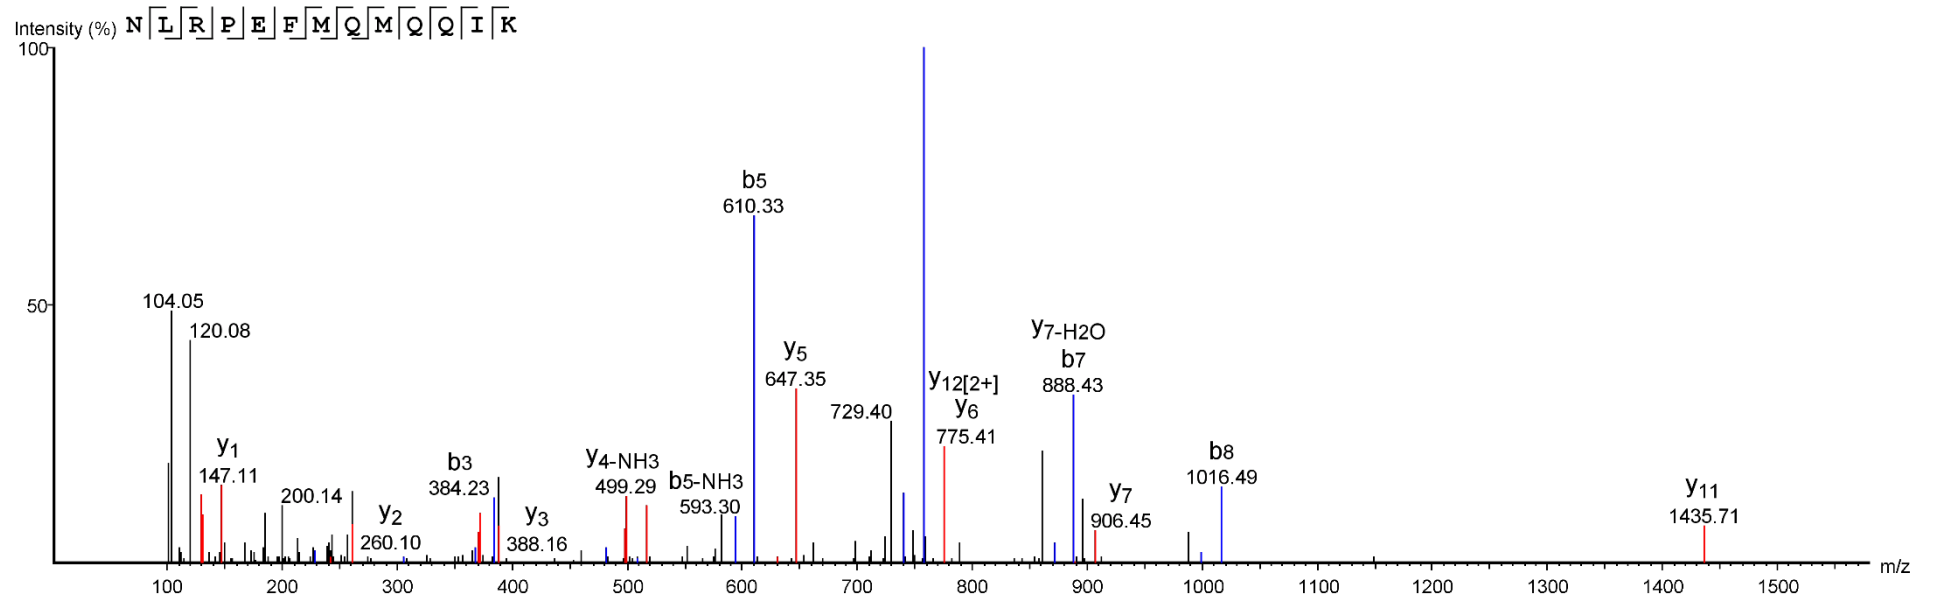

YMT72

Scan #11398

A-296: TRPA1<sub>(391-403)</sub>: NLRPEFM(+15.99)QMQQIK+

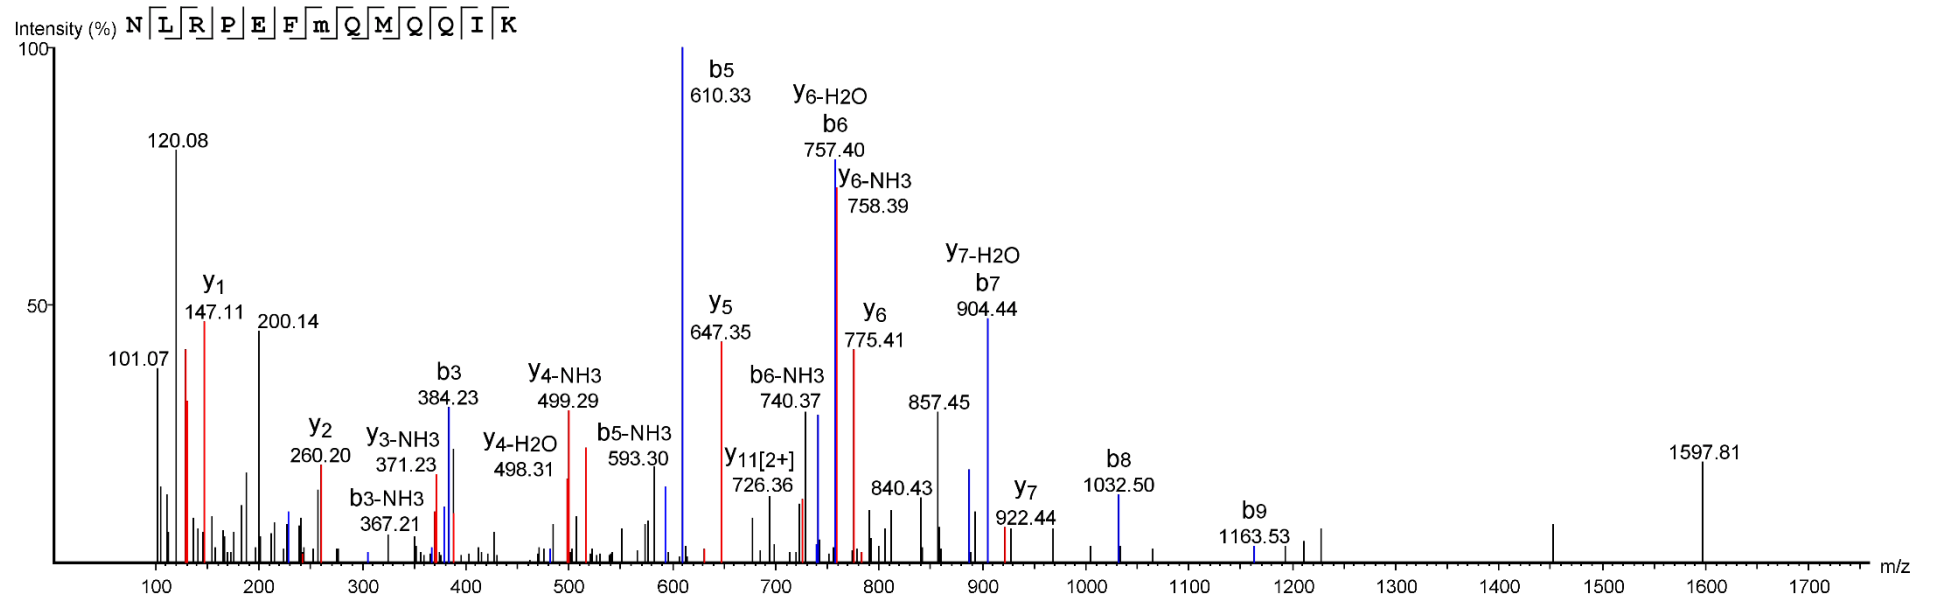

YMT71

Scan #9123



A-297: TRPA1<sub>(391-403)</sub>: NLRPEFM(+15.99)QMQQIK+

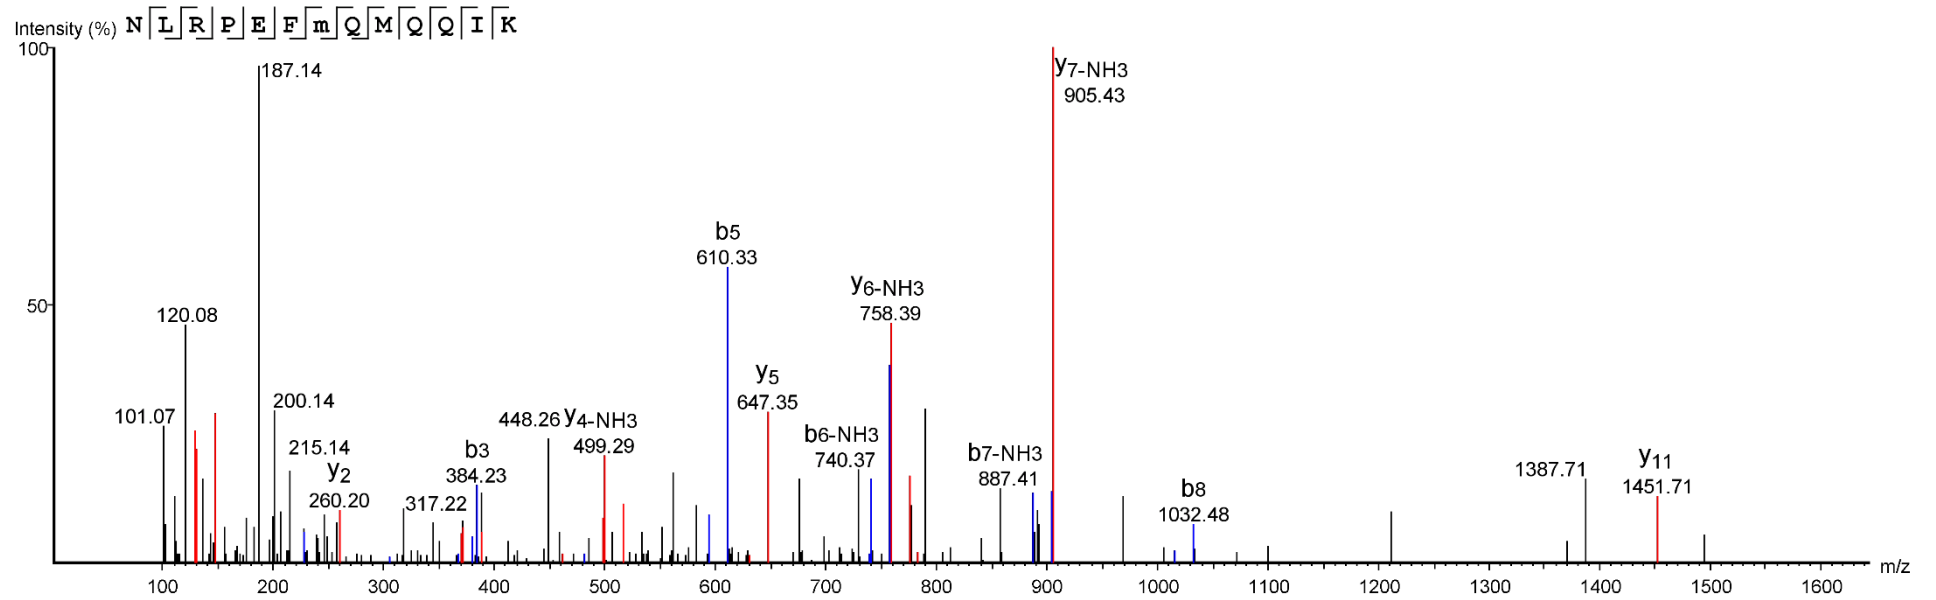

YMT72

Scan #9211

A-298: TRPA1<sub>(391-403)</sub>: NLRPEFMQM(+15.99)QQIK+

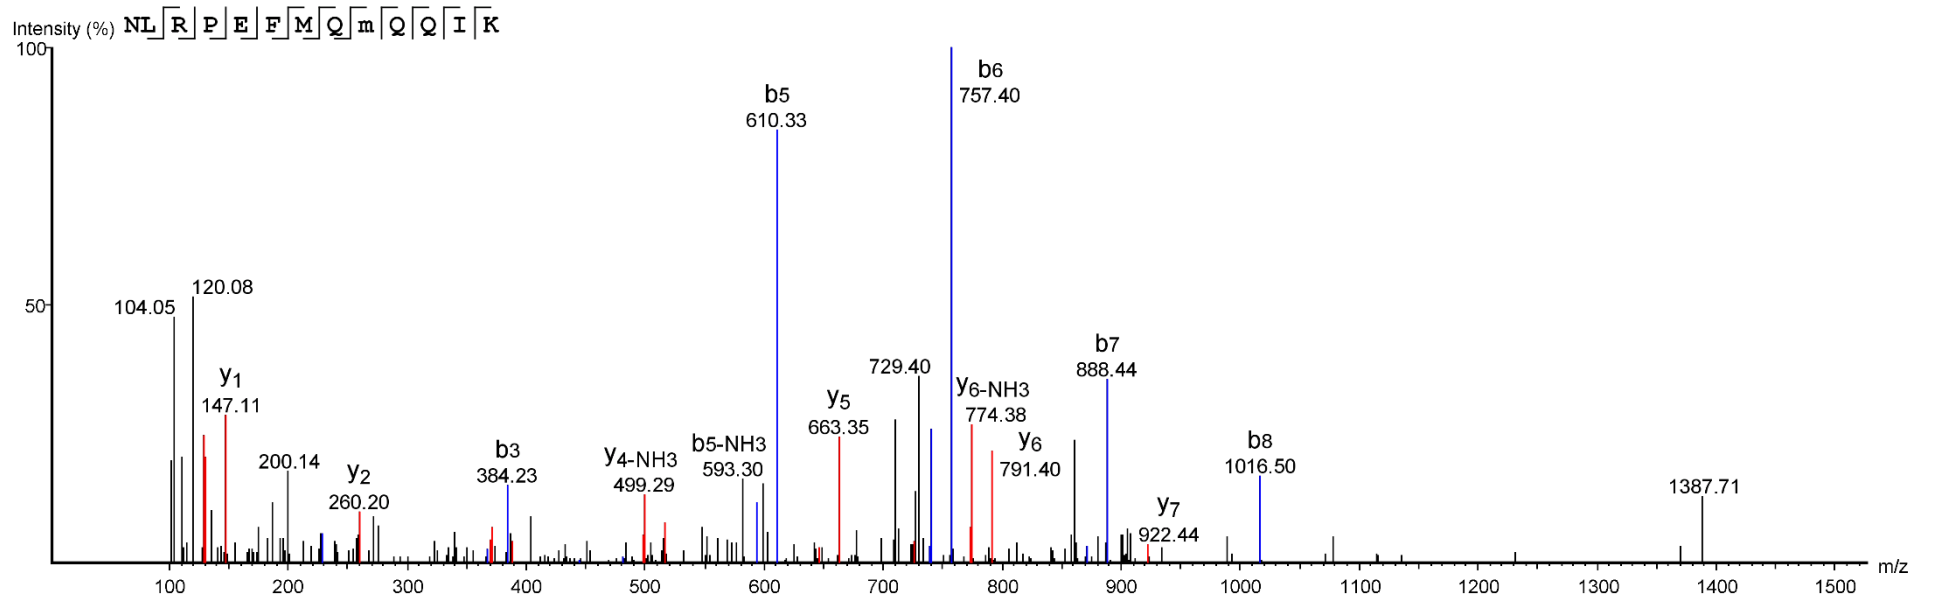

YMT71

Scan #8644

A-299: TRPA1<sub>(391-403)</sub>: NLRPEFMQM(+15.99)QQIK

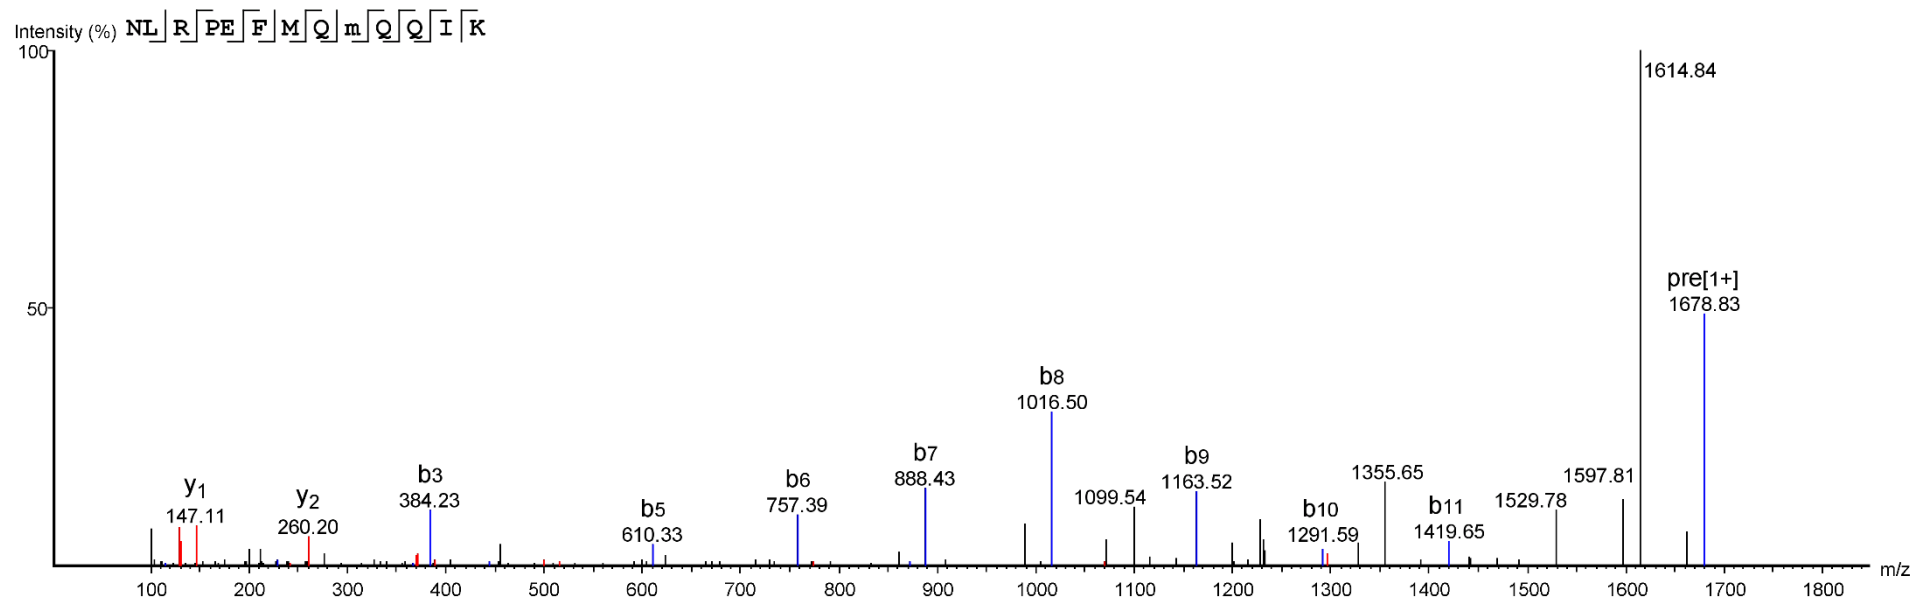

YMT72

Scan #8710

A-300: TP53<sub>(358-370)</sub>: EPGGSRAHSSHLK

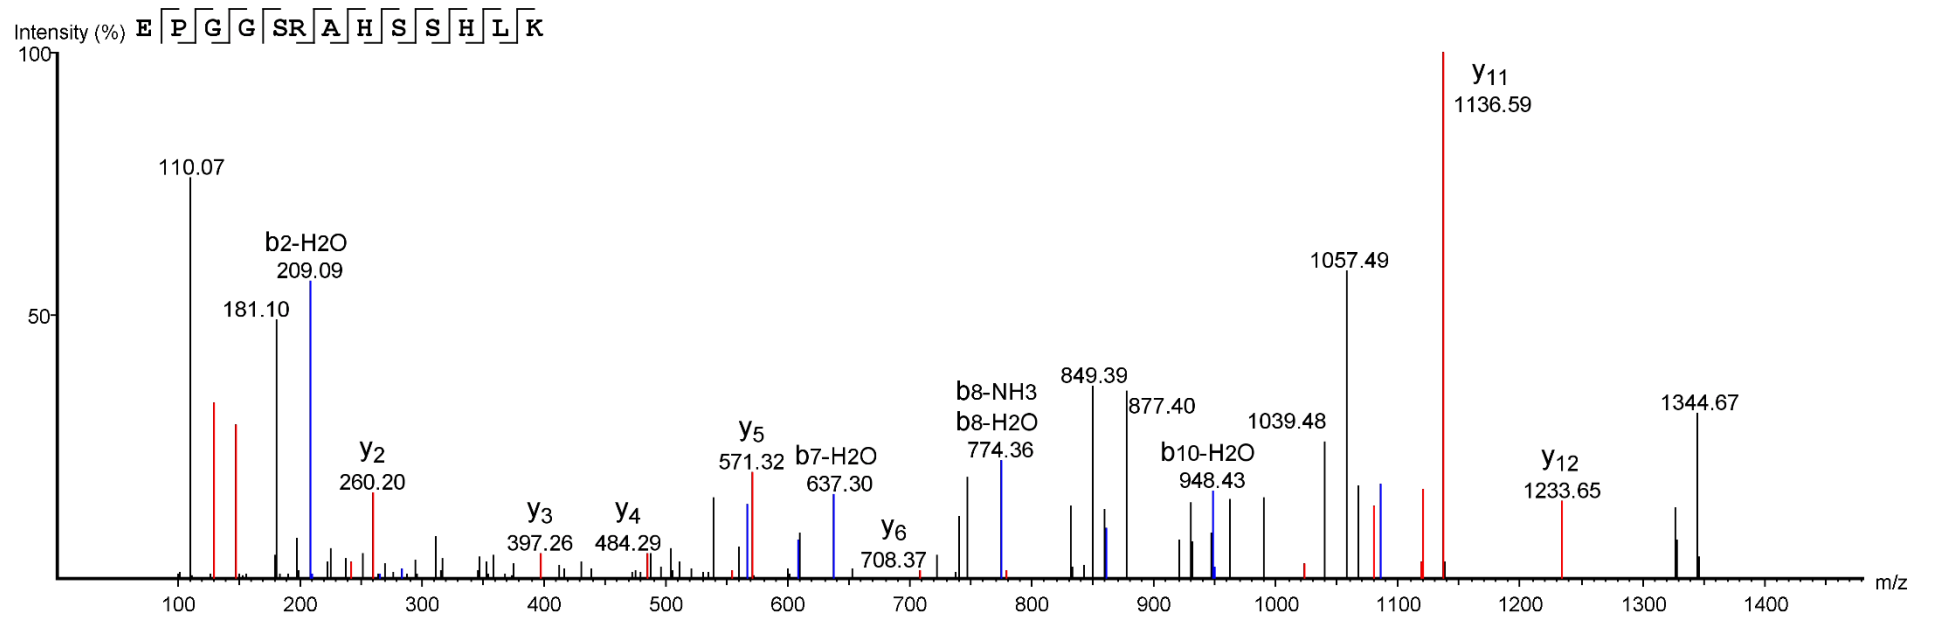

Pep13C

Scan #3194

A-301: TP53<sub>(358-370)</sub>: EP(+15.99)GGSRAHSSHLK

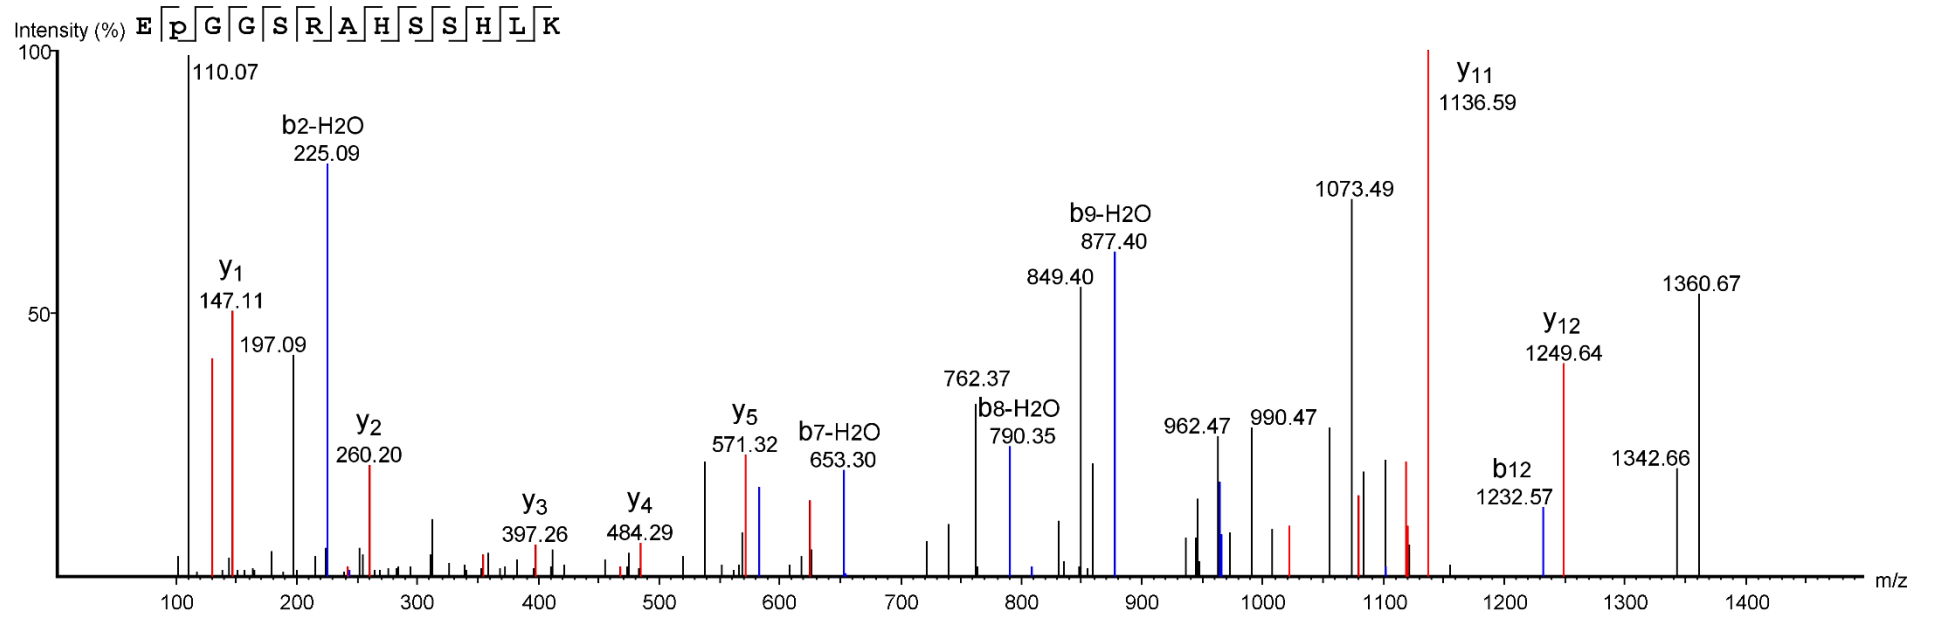

Pep13C  
Scan #3186

A-302: TP53<sub>(358-370)</sub>: EPGGSRAHSSHLK

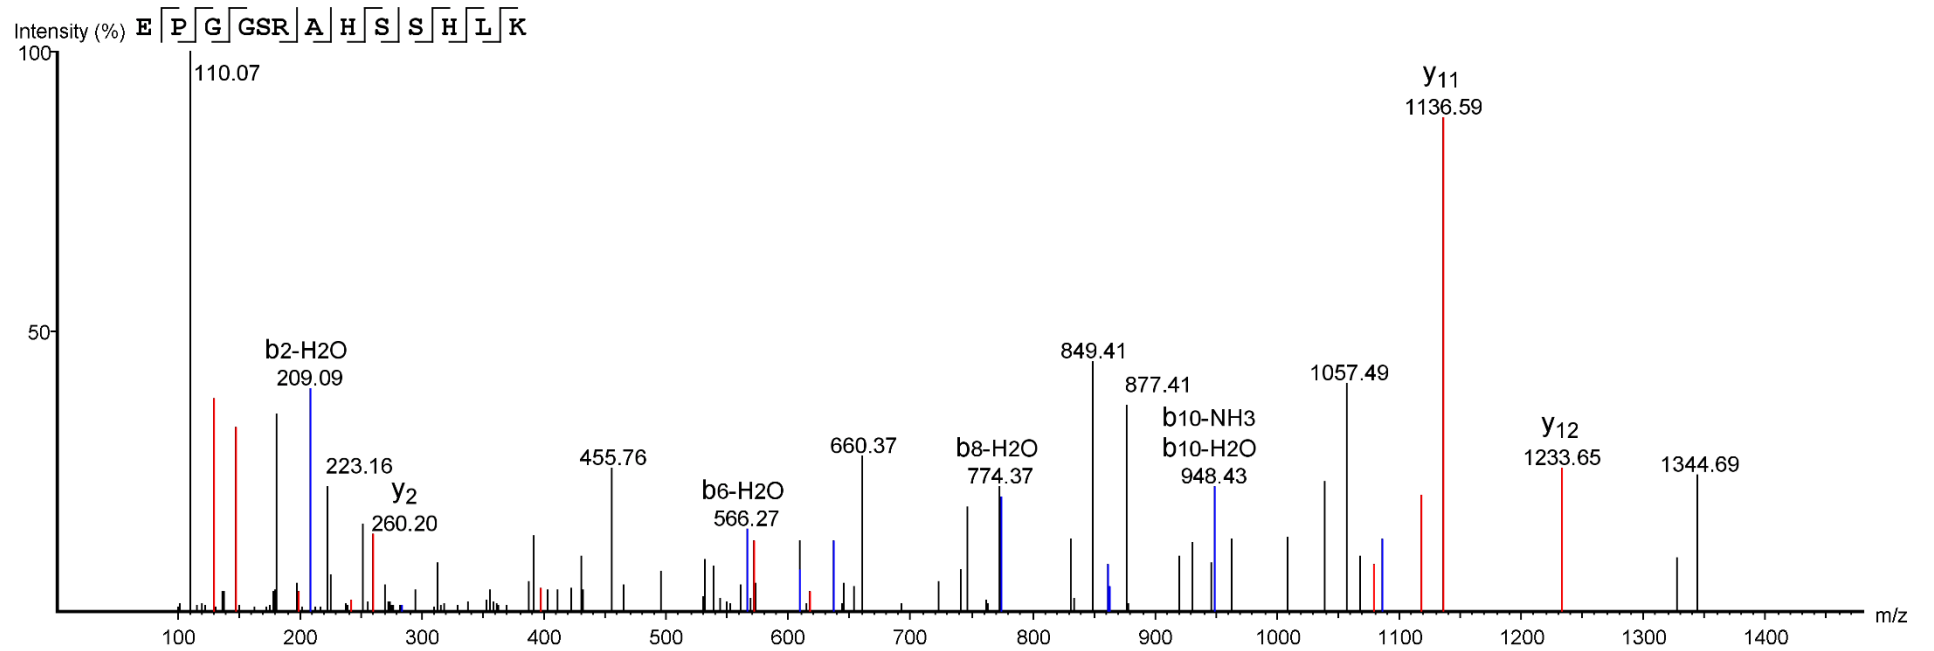

YMT113

Scan #3001

A-303: TP53<sub>(358-370)</sub>: EPGGSRAHSSHLK

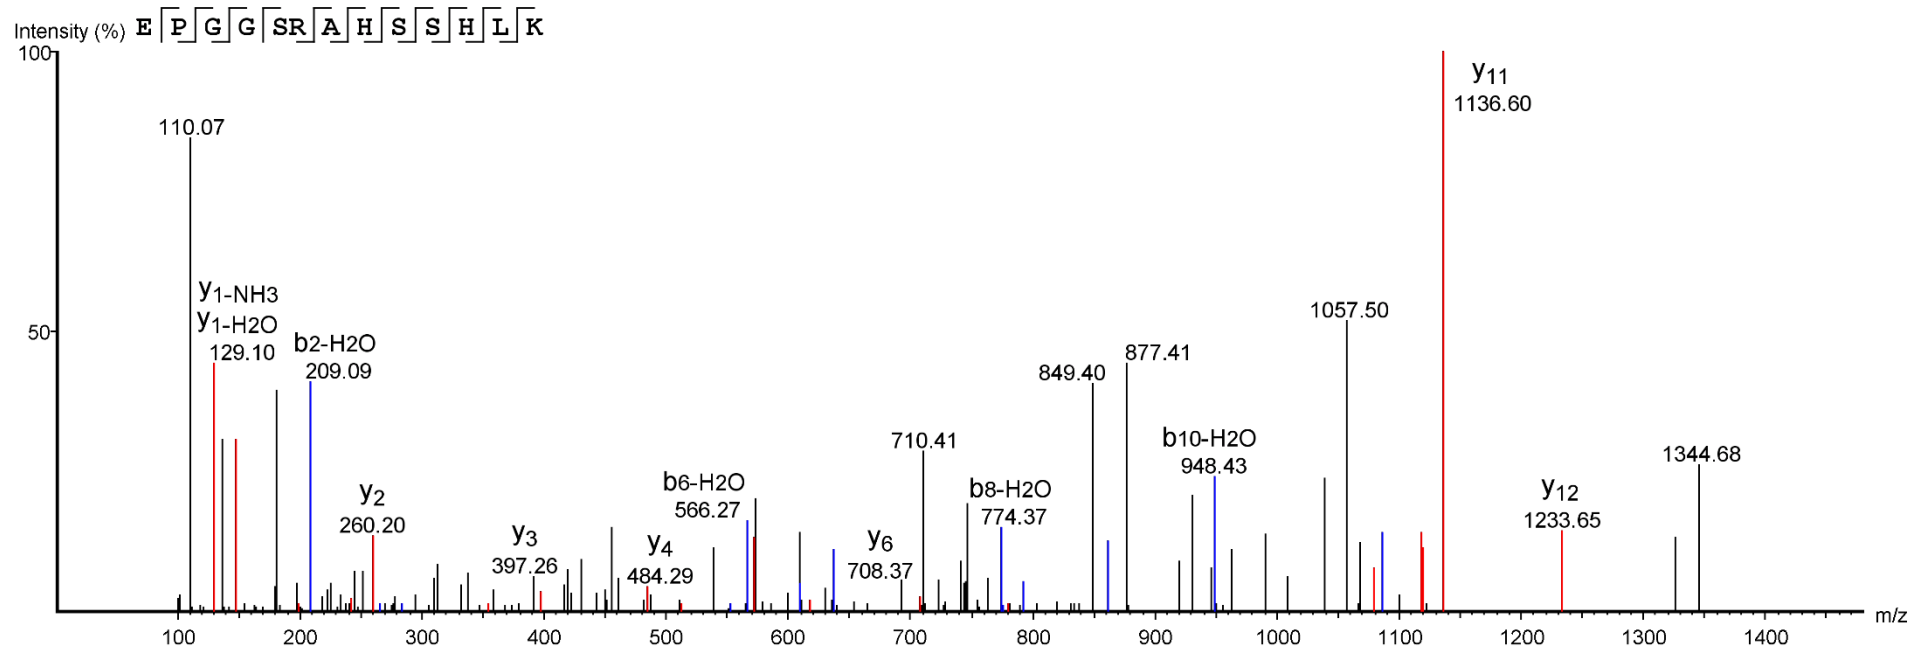

YMT114

Scan #3065

A-304: THRA<sub>(153-176)</sub>: S**L**Q**Q**R**P**E**P**T**P**E**E**W**D**L**I**H**I**A**T**E**A**H**R**

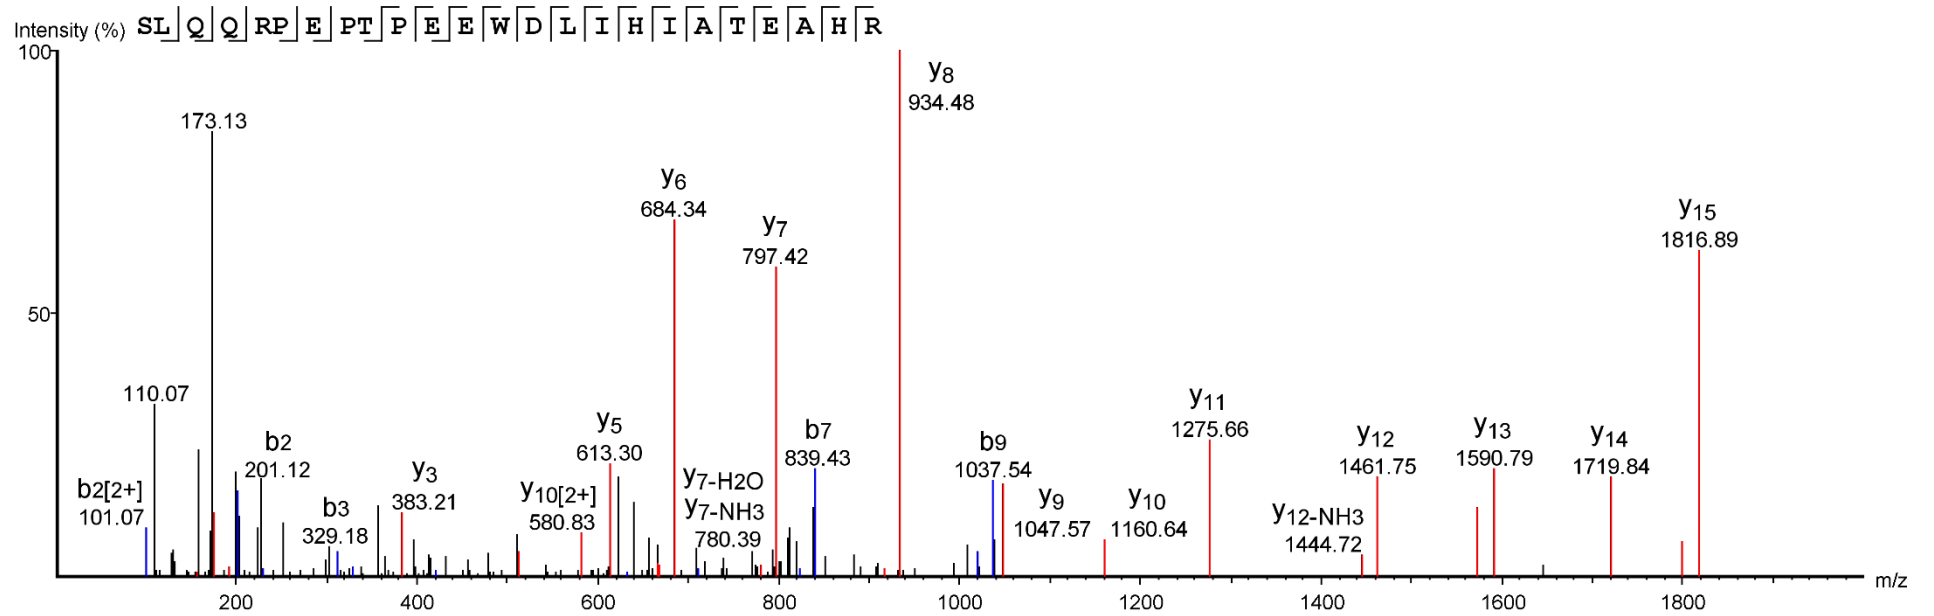

YMT93

Scan #15237



A-305: THRA<sub>(153-176)</sub>: SLQQRPEPTPEEWDLIHIA<sup>T</sup>EAHR

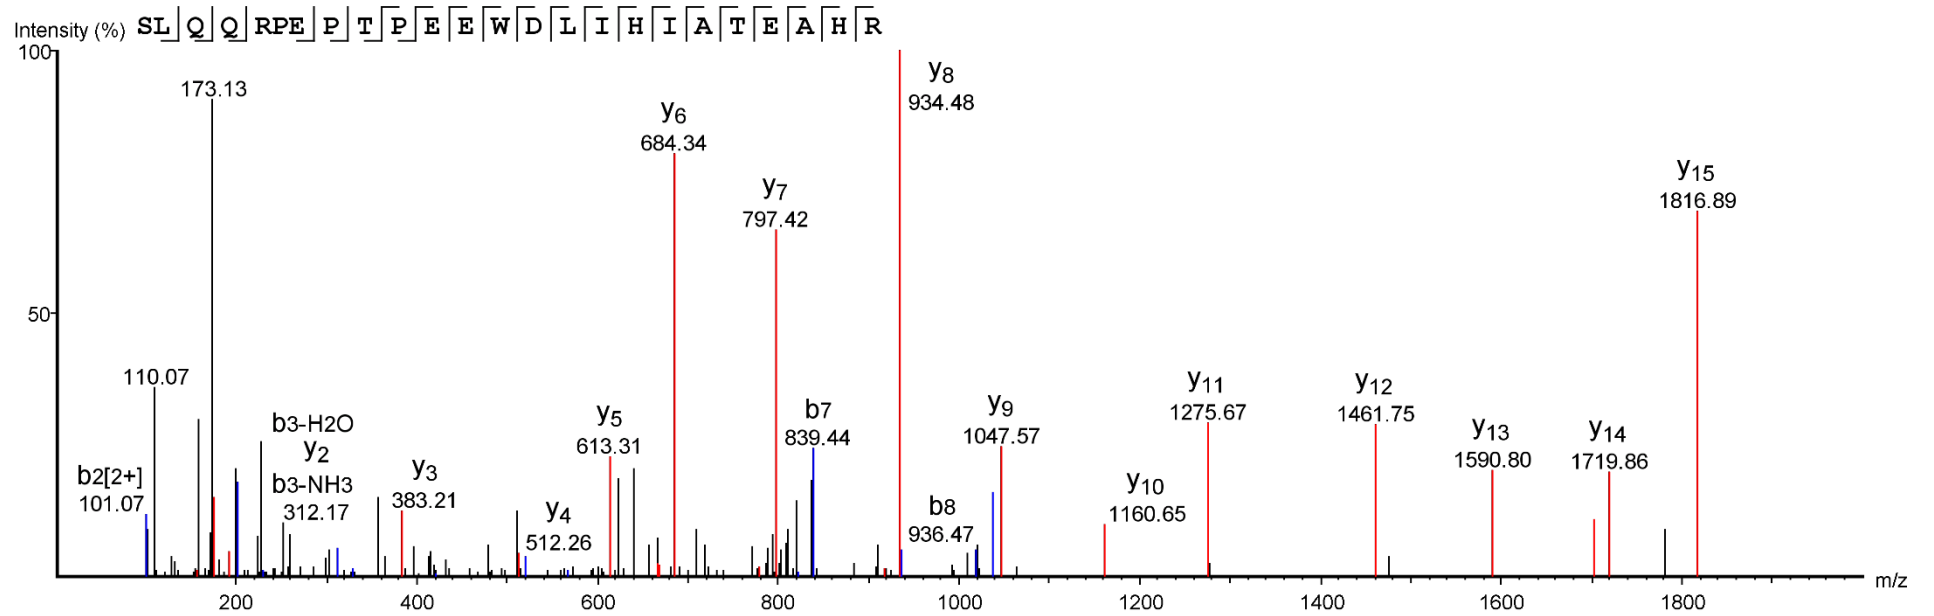

YMT94

Scan #15235

A-306: THRA<sub>(153-176)</sub>: SLQQRPEPTPEEWD(+15.99)LIHIATEAHR

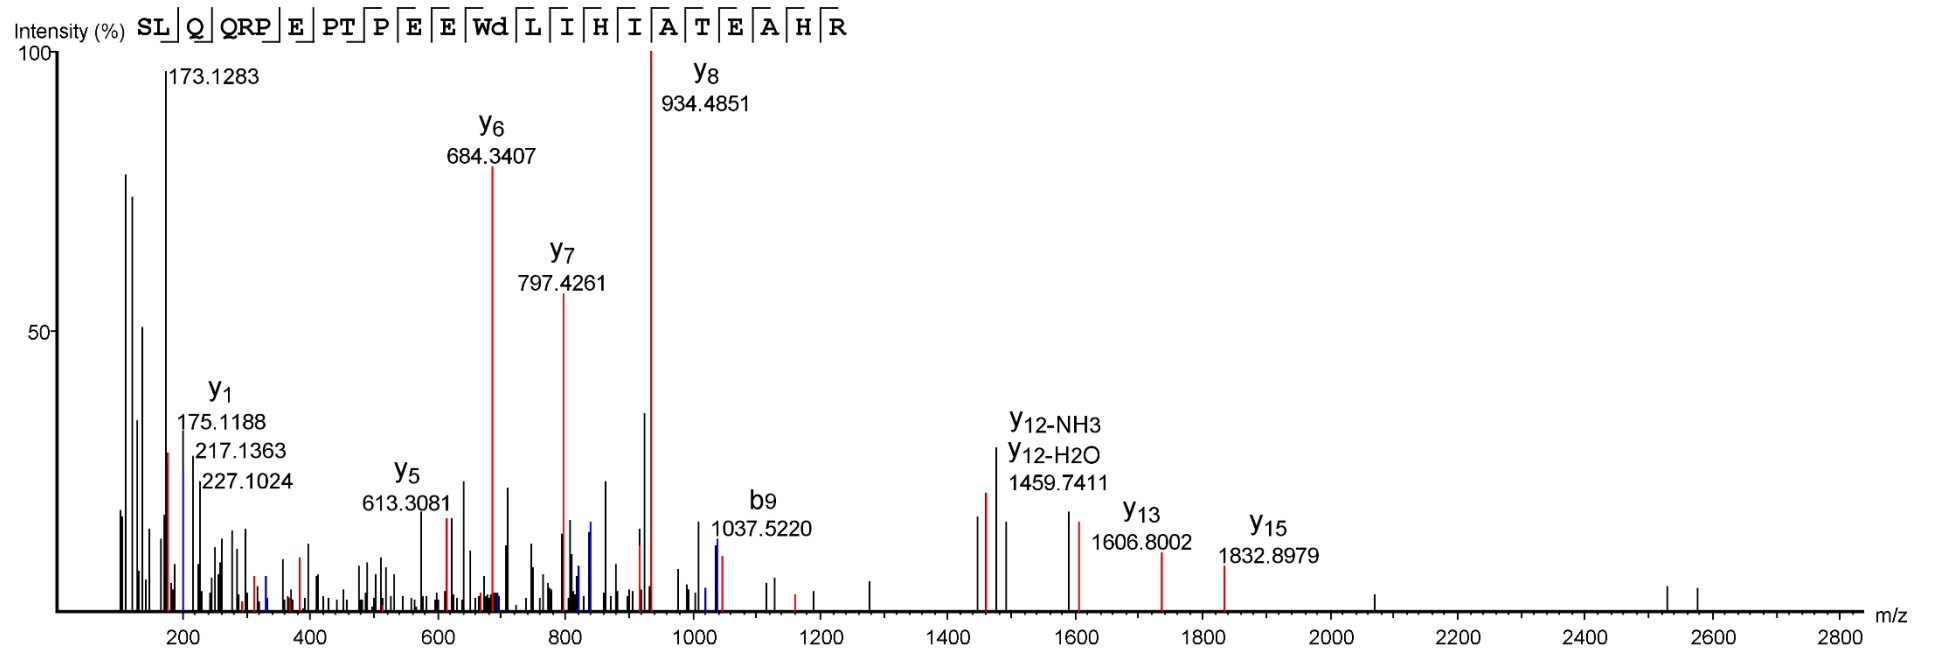

YMT93

Scan #11212

A-307: THRA<sub>(153-176)</sub>: SLQQRPEPTP(+15.99)EEWDLIHIAATEAHR

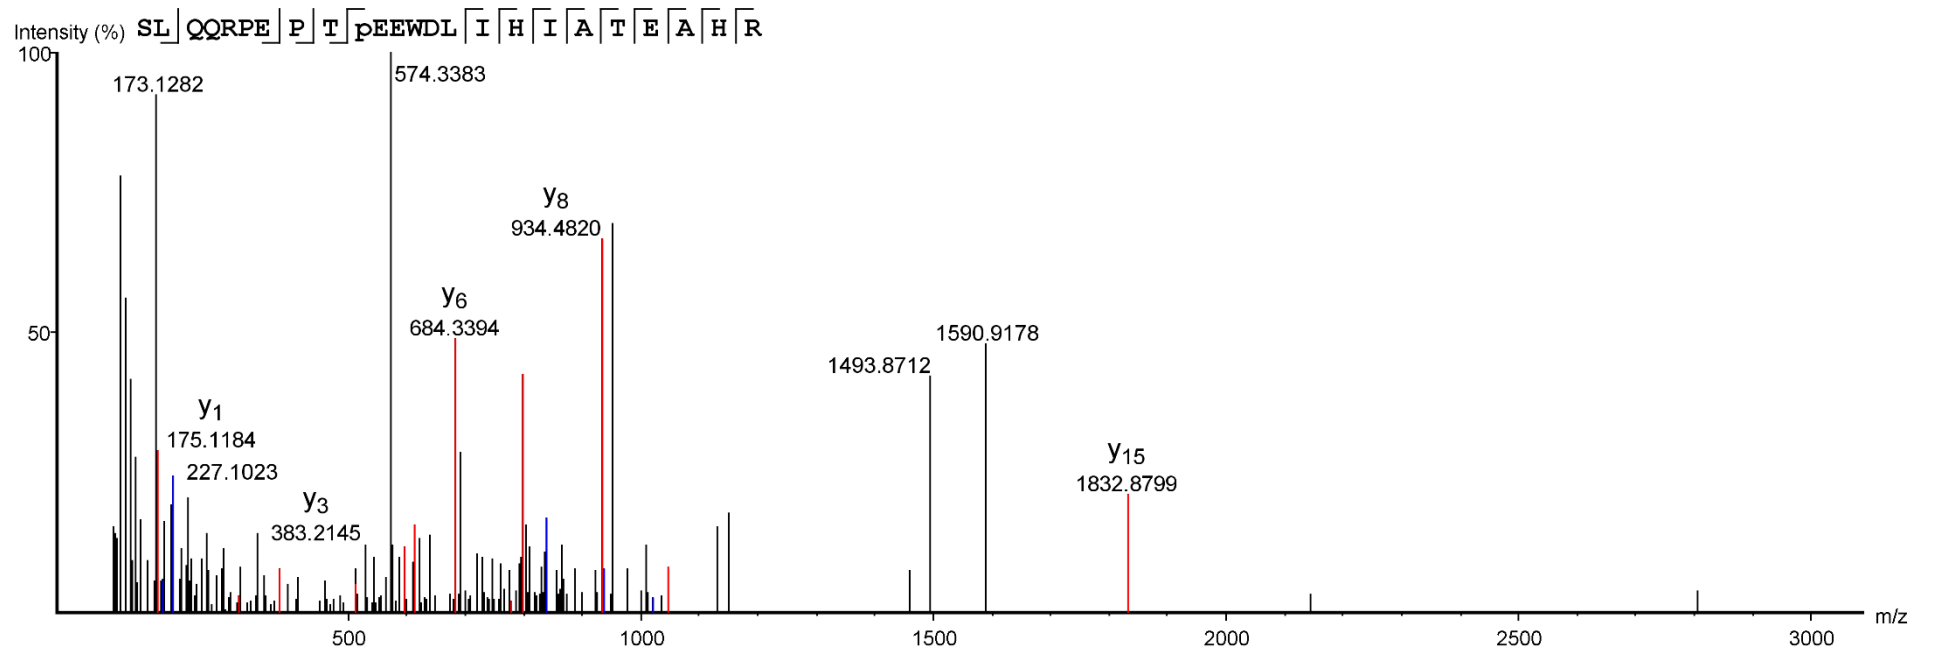

YMT94

Scan #11325

A-308: THRA<sub>(153-176)</sub>: SLQQRPEPTPEEW(+31.99)DLIHIA TEAHR

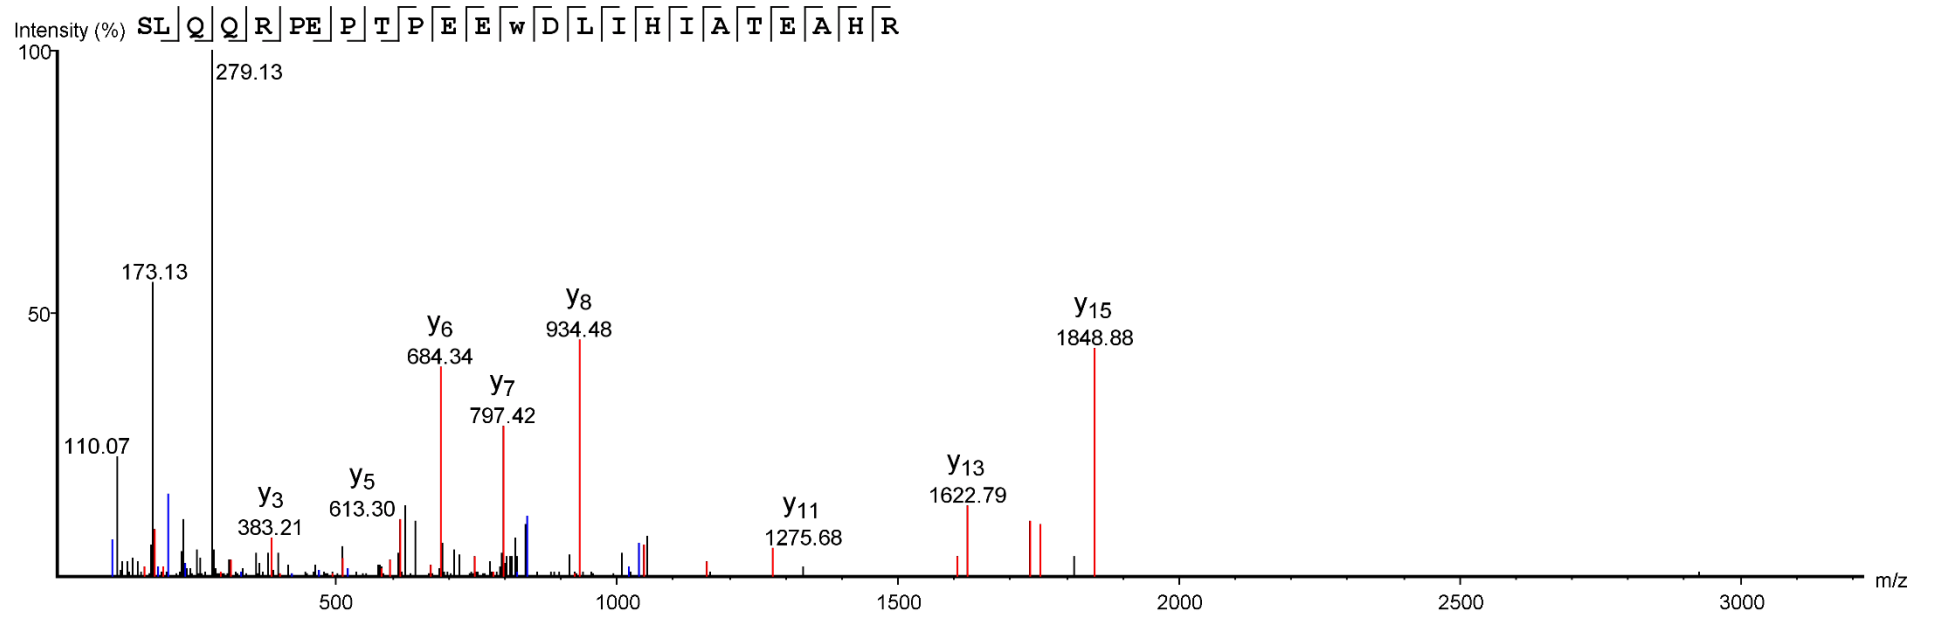

YMT93

Scan #13739

A-309: THRA<sub>(153-176)</sub>: SLQQRPEPTPEEW(+31.99)DLIHIA TEAHR

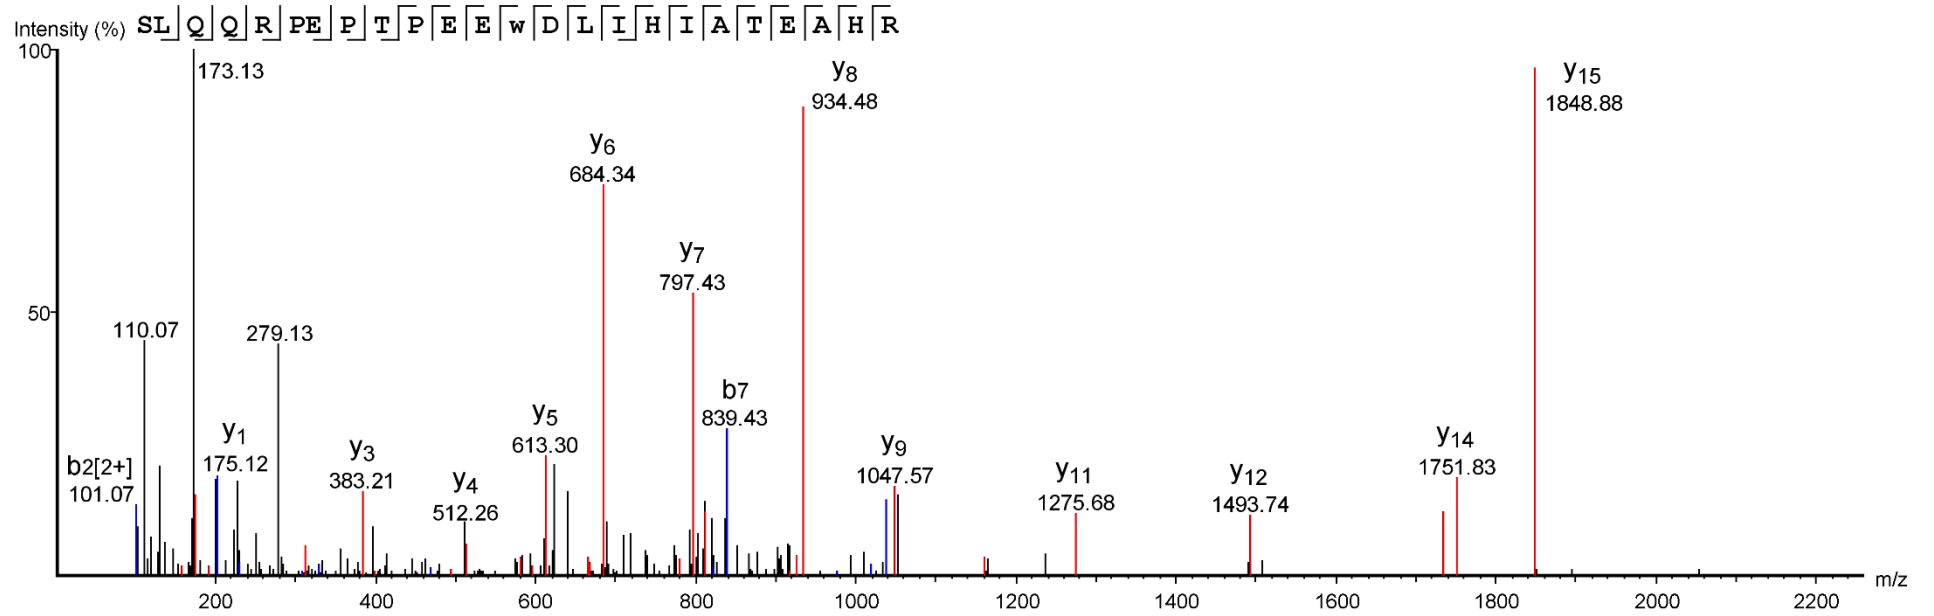

YMT94

Scan #13614

A-310: THRA<sub>(153-176)</sub>: SLQQRPEPTPEEWDLIHIA TEAHR

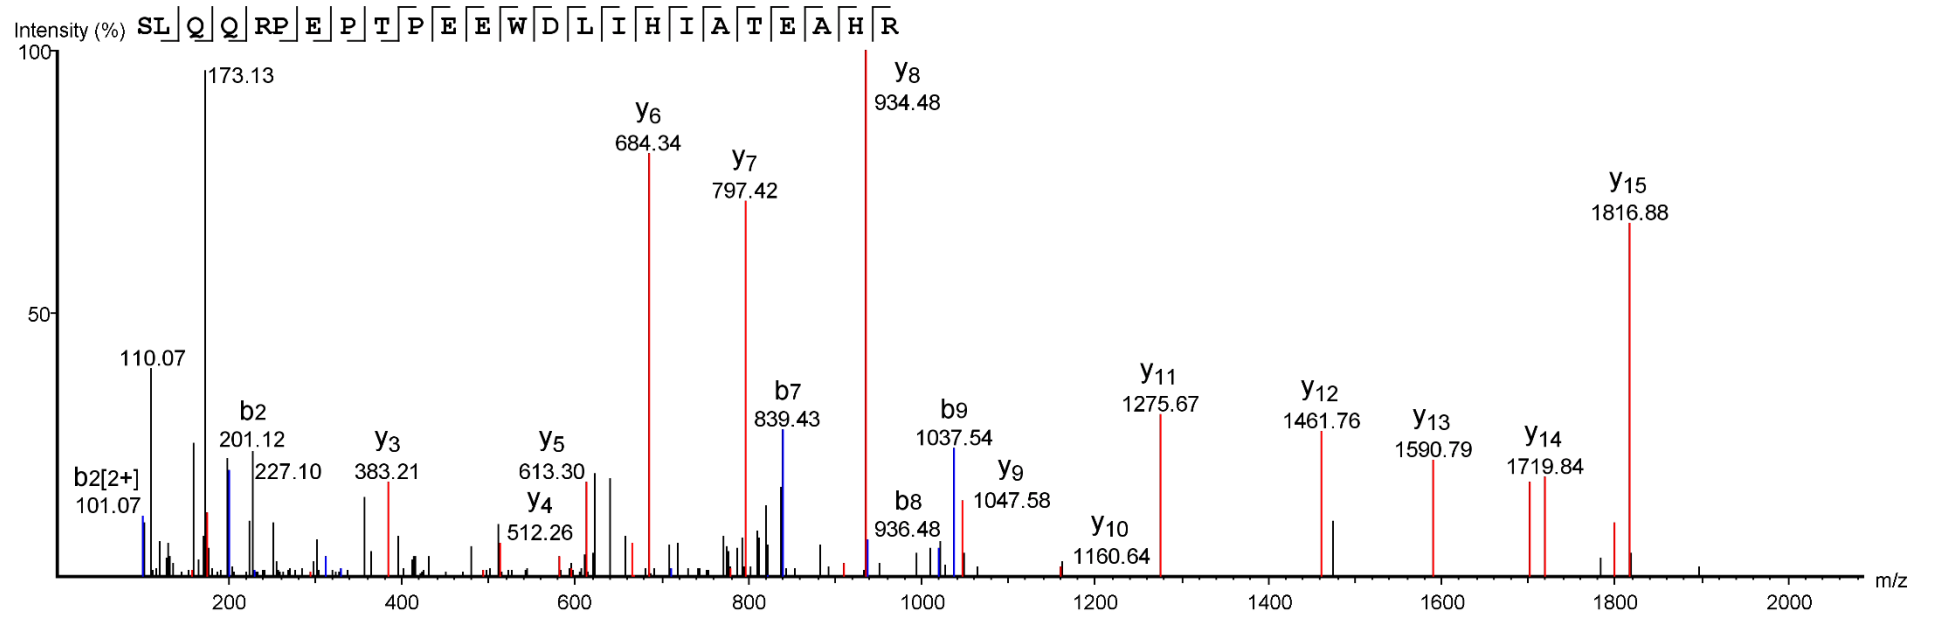

YMT95

Scan #15703

A-311: THRA<sub>(153-176)</sub>: SLQQRPEPTPEEW(+31.99)DLIHIA TEAHR

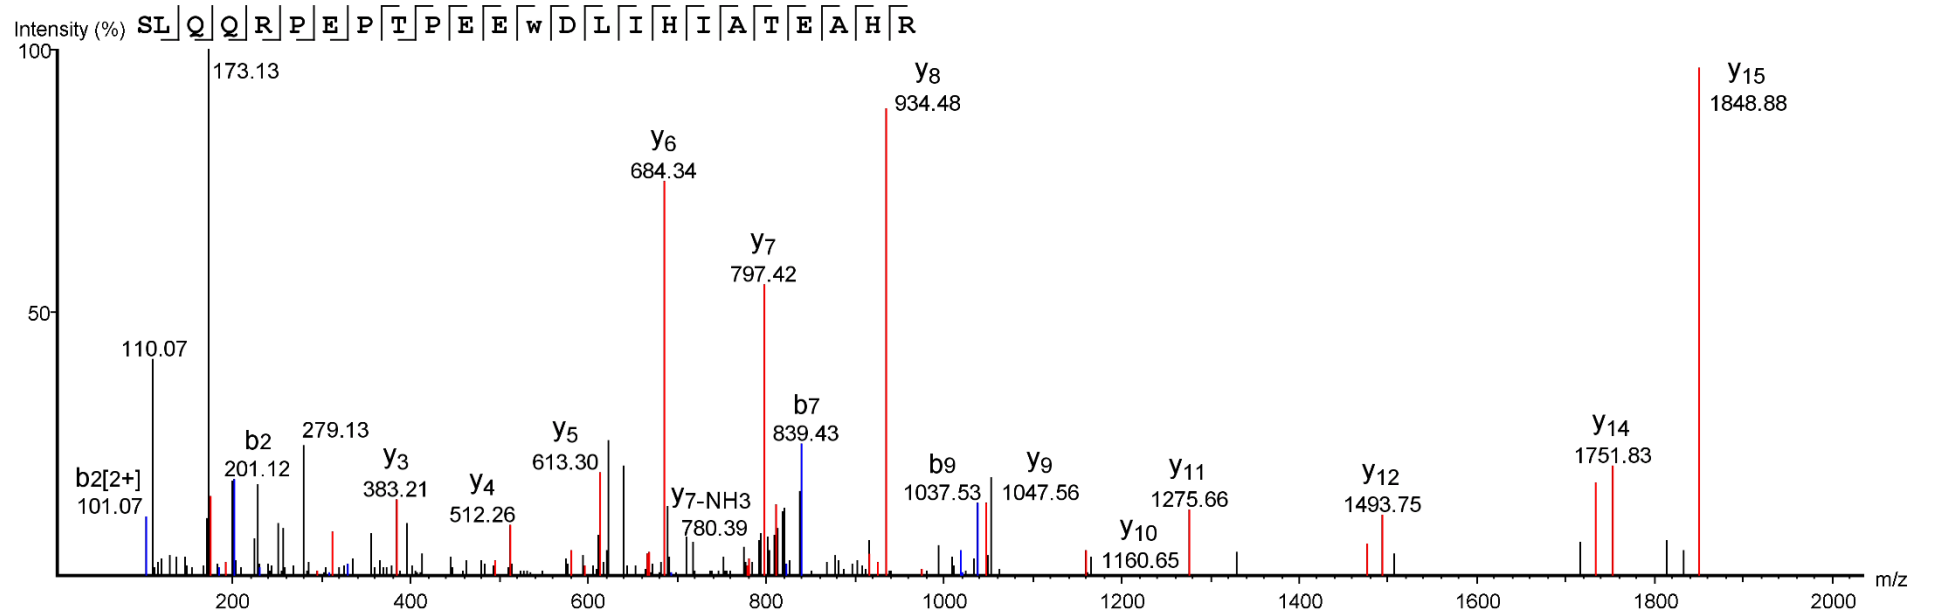

YMT95

Scan #13852

A-312: EPOR<sub>(426-453)</sub>: YTILDPSSQLLRPWTLC(+57.02)PELPPTPHLK

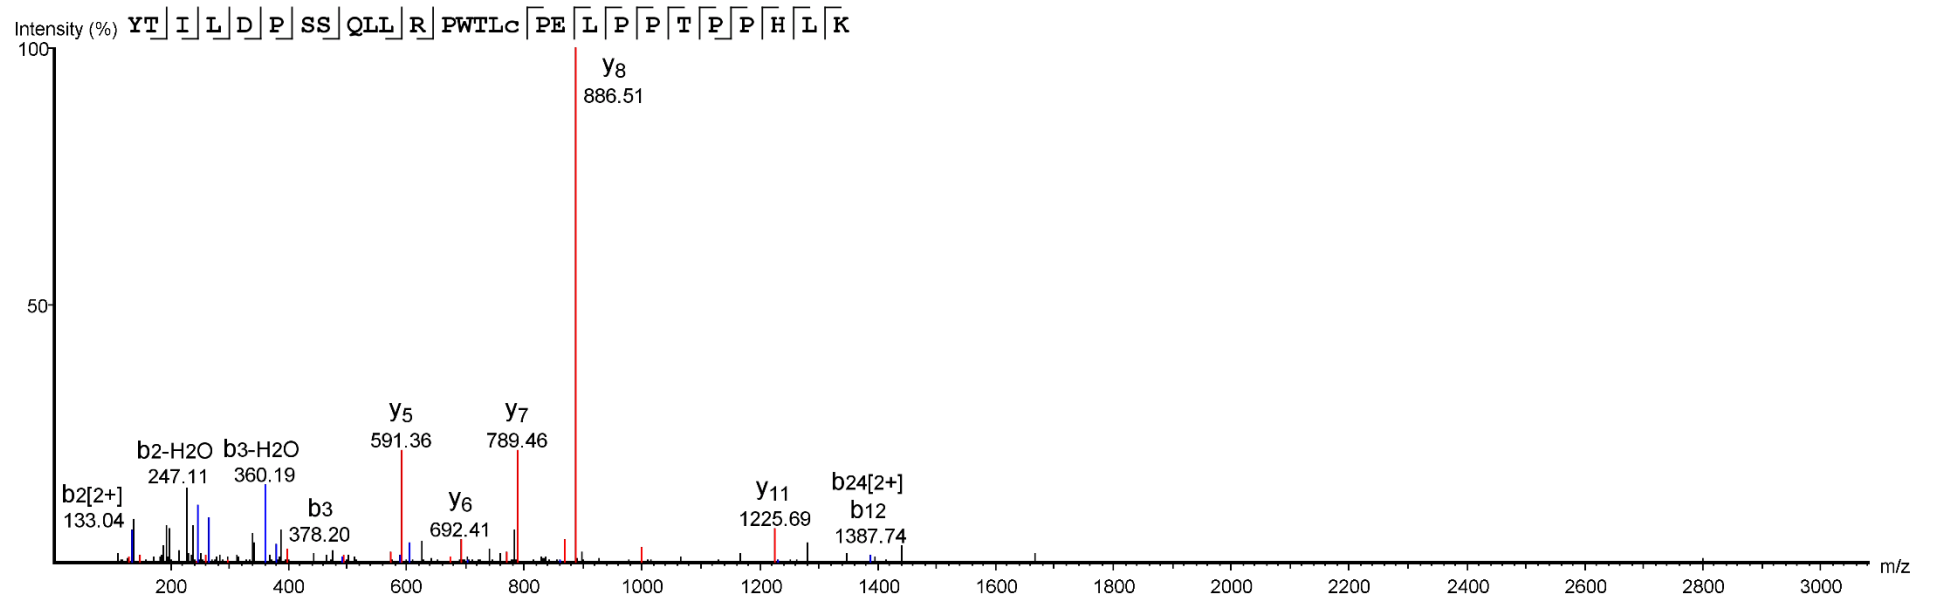

YMT63

Scan #18425



A-313: EPOR<sub>(426-453)</sub>: YTILDPSSQLLRPWTLC(+57.02)PELPPTPHLK

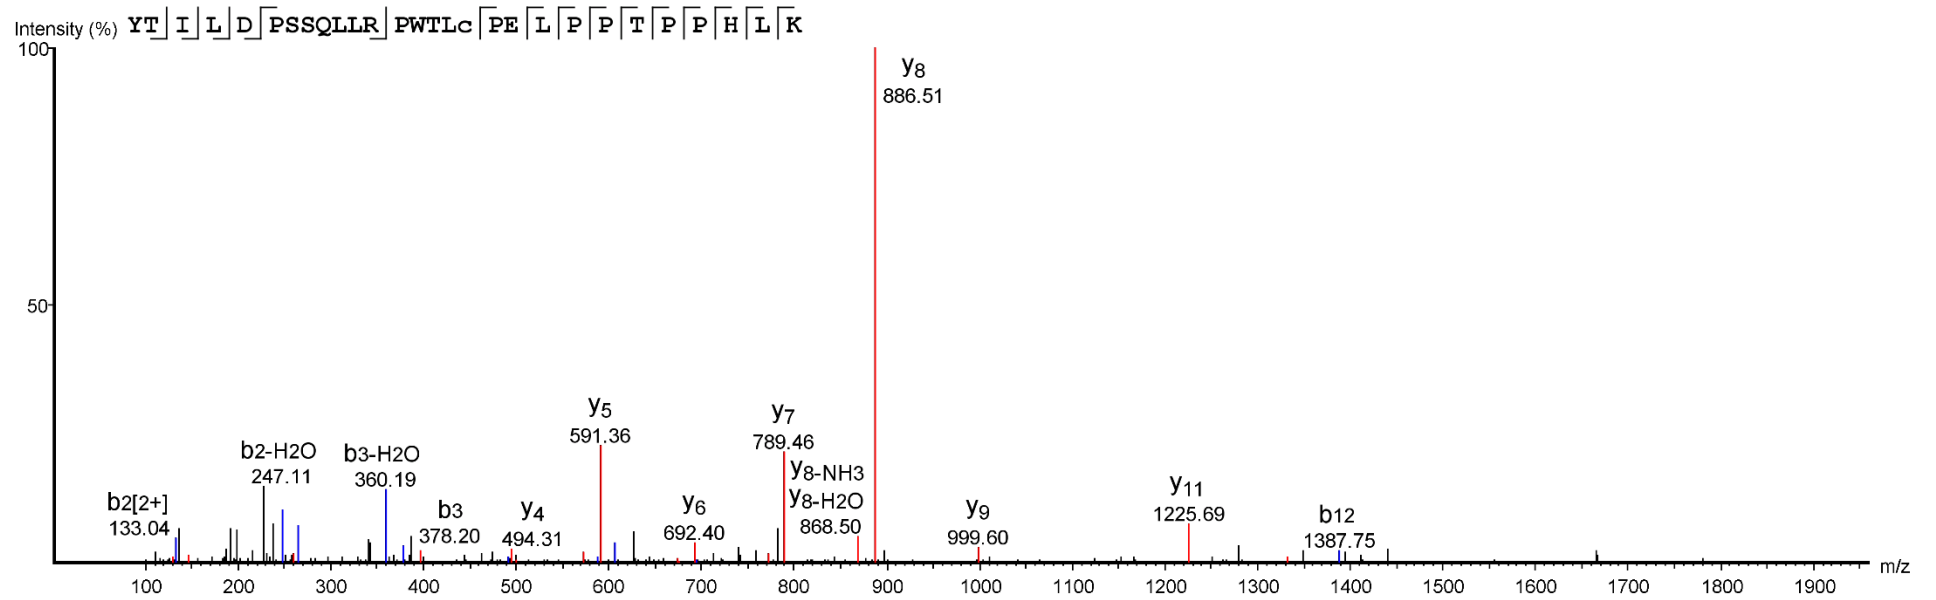

YMT64

Scan #18188

A-314: EPOR<sub>(426-453)</sub>: YTILDPSSQLLRP(+15.99)WTLC(+57.02)PELPPTPPHLK

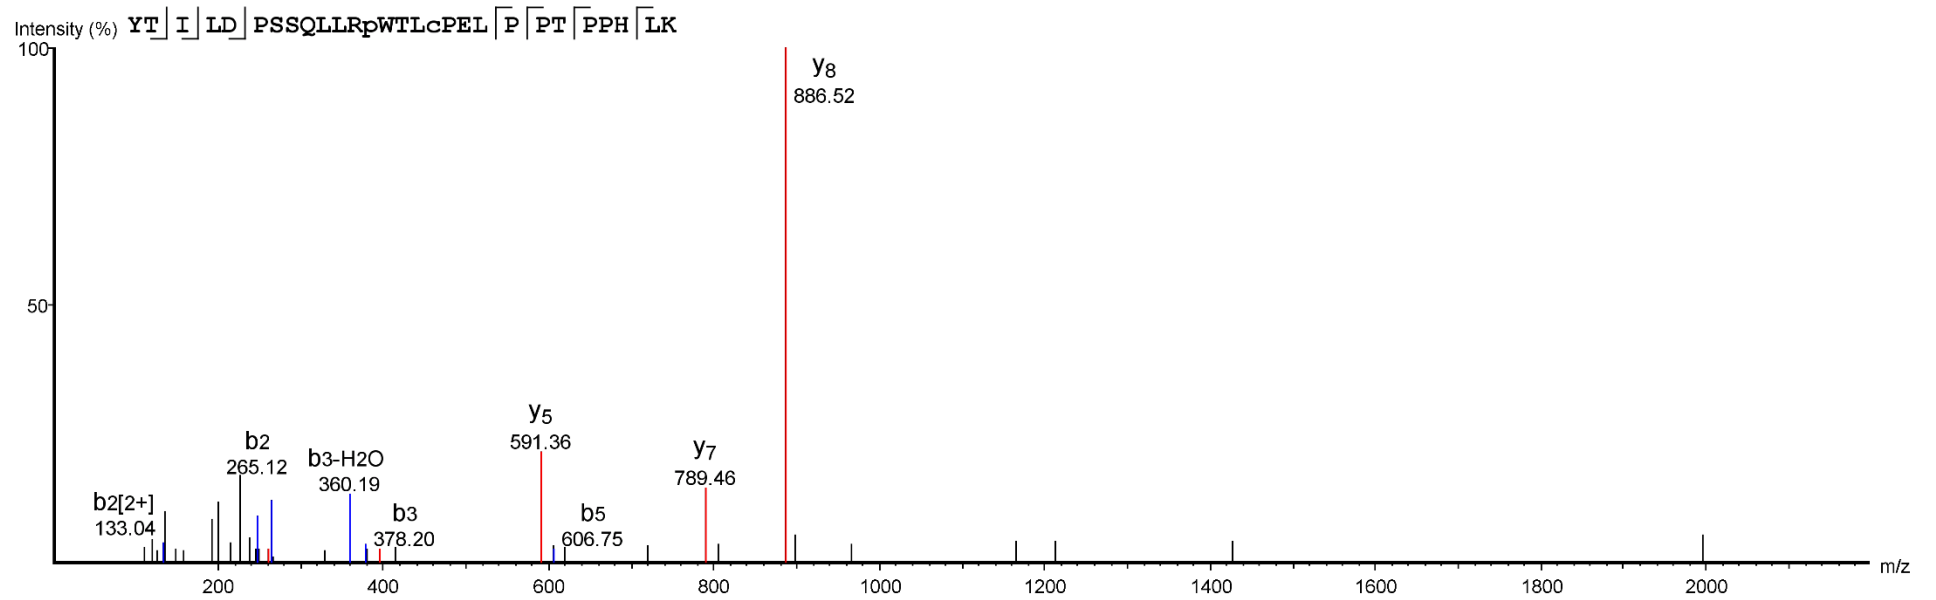

YMT63

Scan #17329

A-315: EPOR<sub>(426-453)</sub>: YTILDPSSQLLRPW(+31.99)TLC(+57.02)PELPPTPHLK

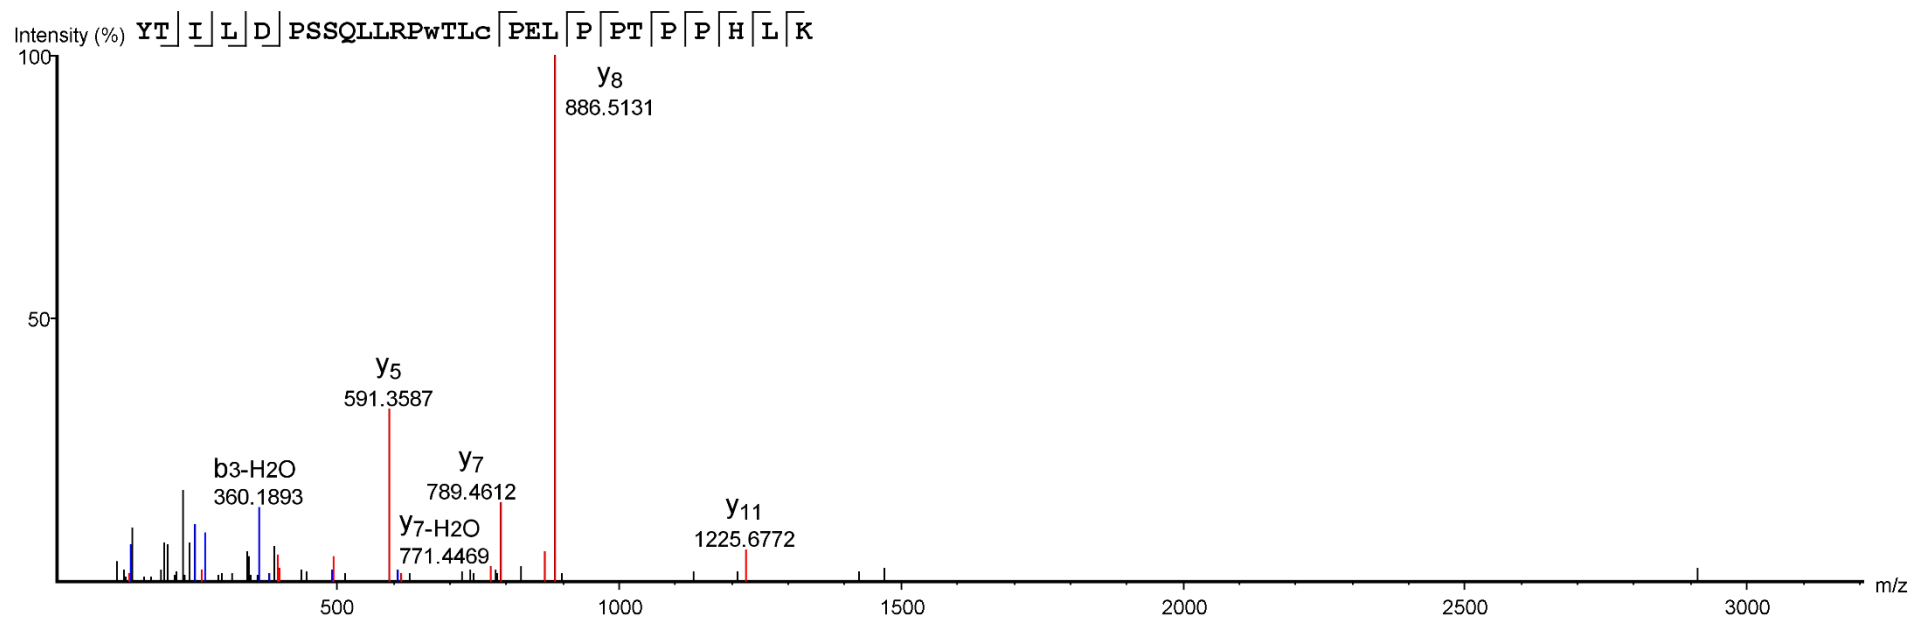

YMT63

Scan #17308

A-316: EPOR<sub>(426-453)</sub>: YTILDPSSQLLRPW(+31.99)TLC(+57.02)PELPPTPPHLK

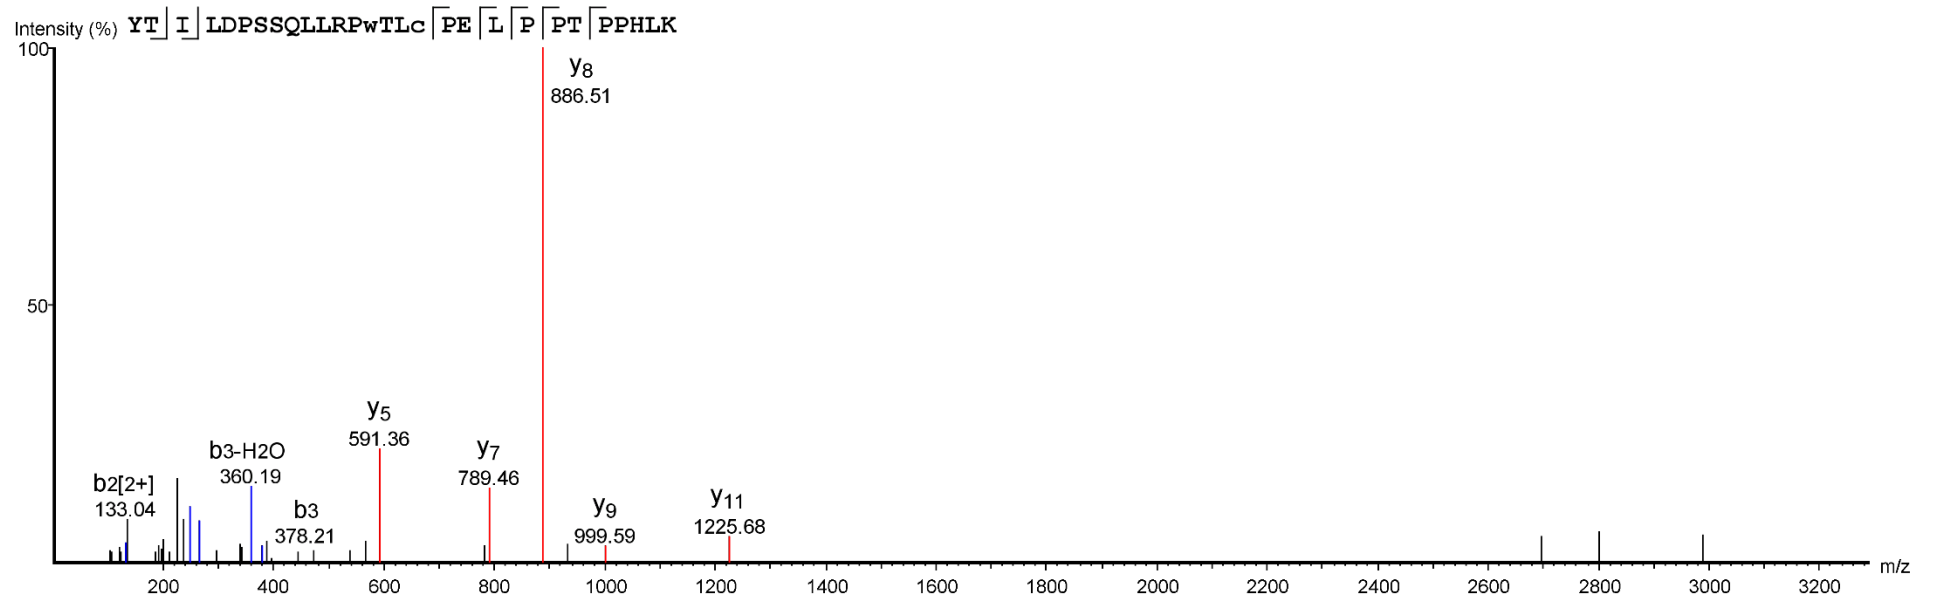

YMT64

Scan #17367

A-317: HIF-1 $\alpha$ \*<sub>(548-575)</sub>: NPFSTQDSDLLEALAPYIPADDDFQLR

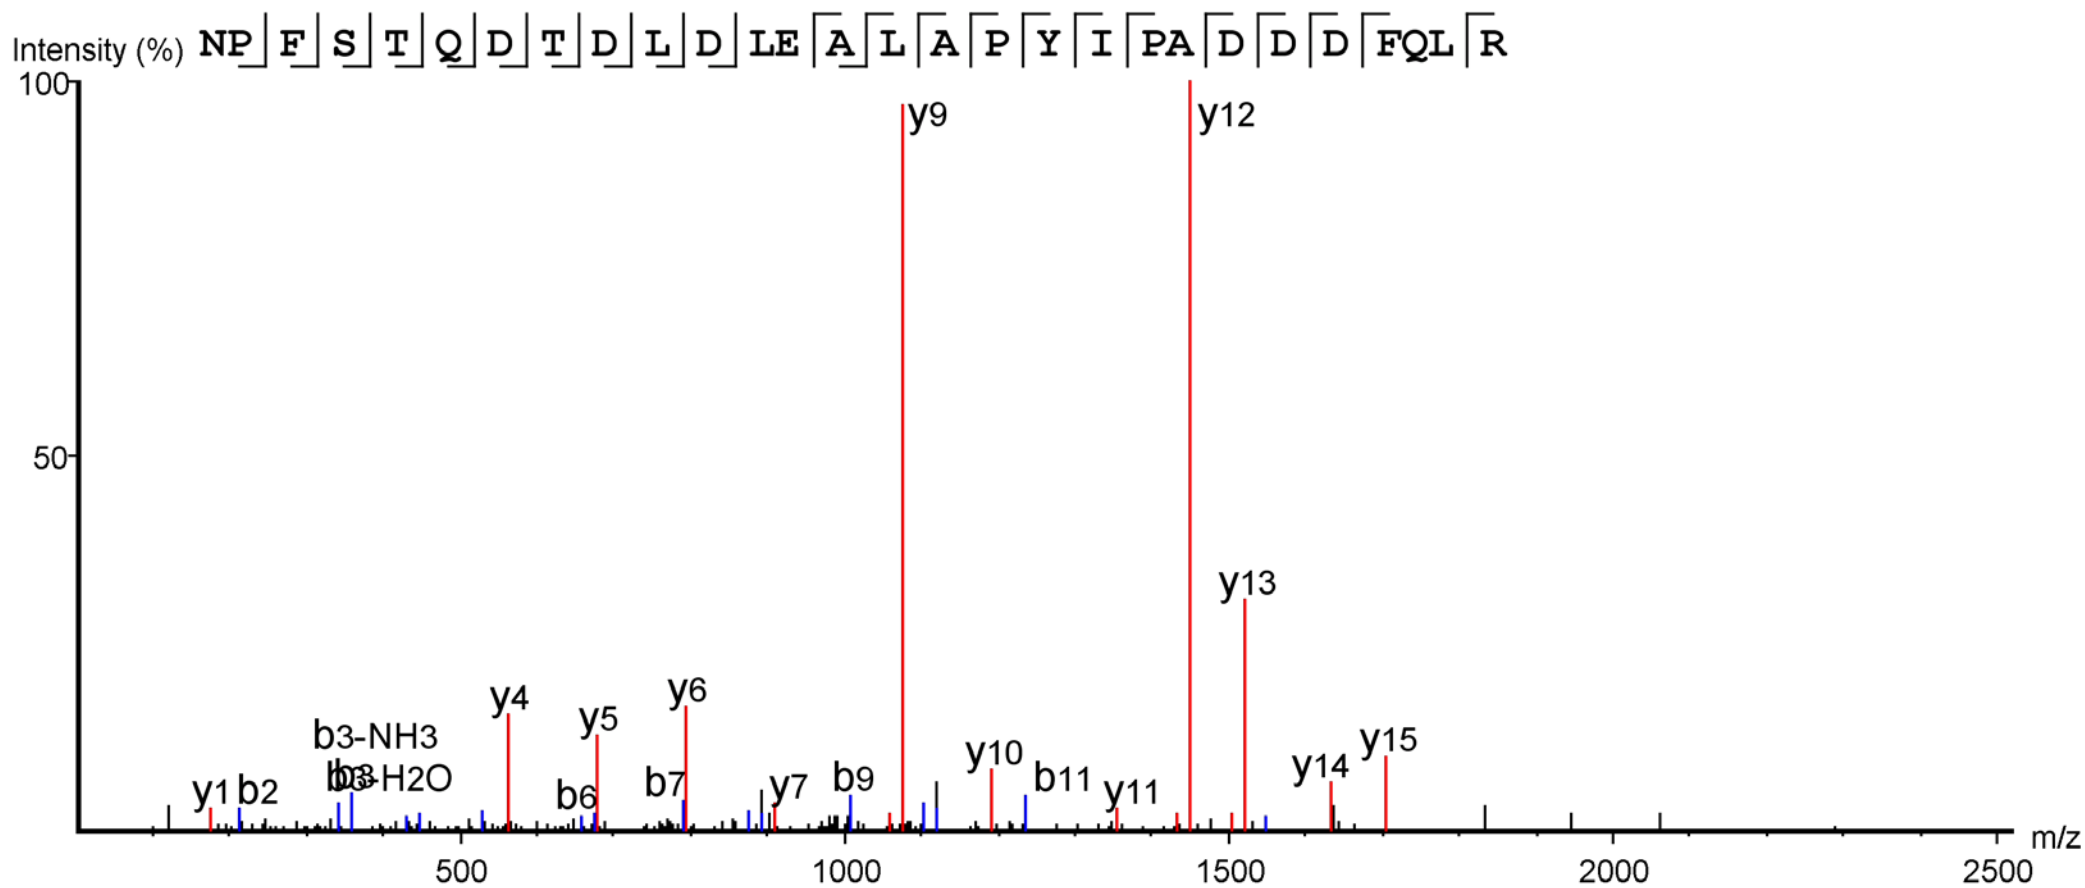

YMT115

Scan #25893

A-318: HIF-1 $\alpha^*$  (548-575): NPFSTQDLDLDLEALAPYIPADDDDFQLR

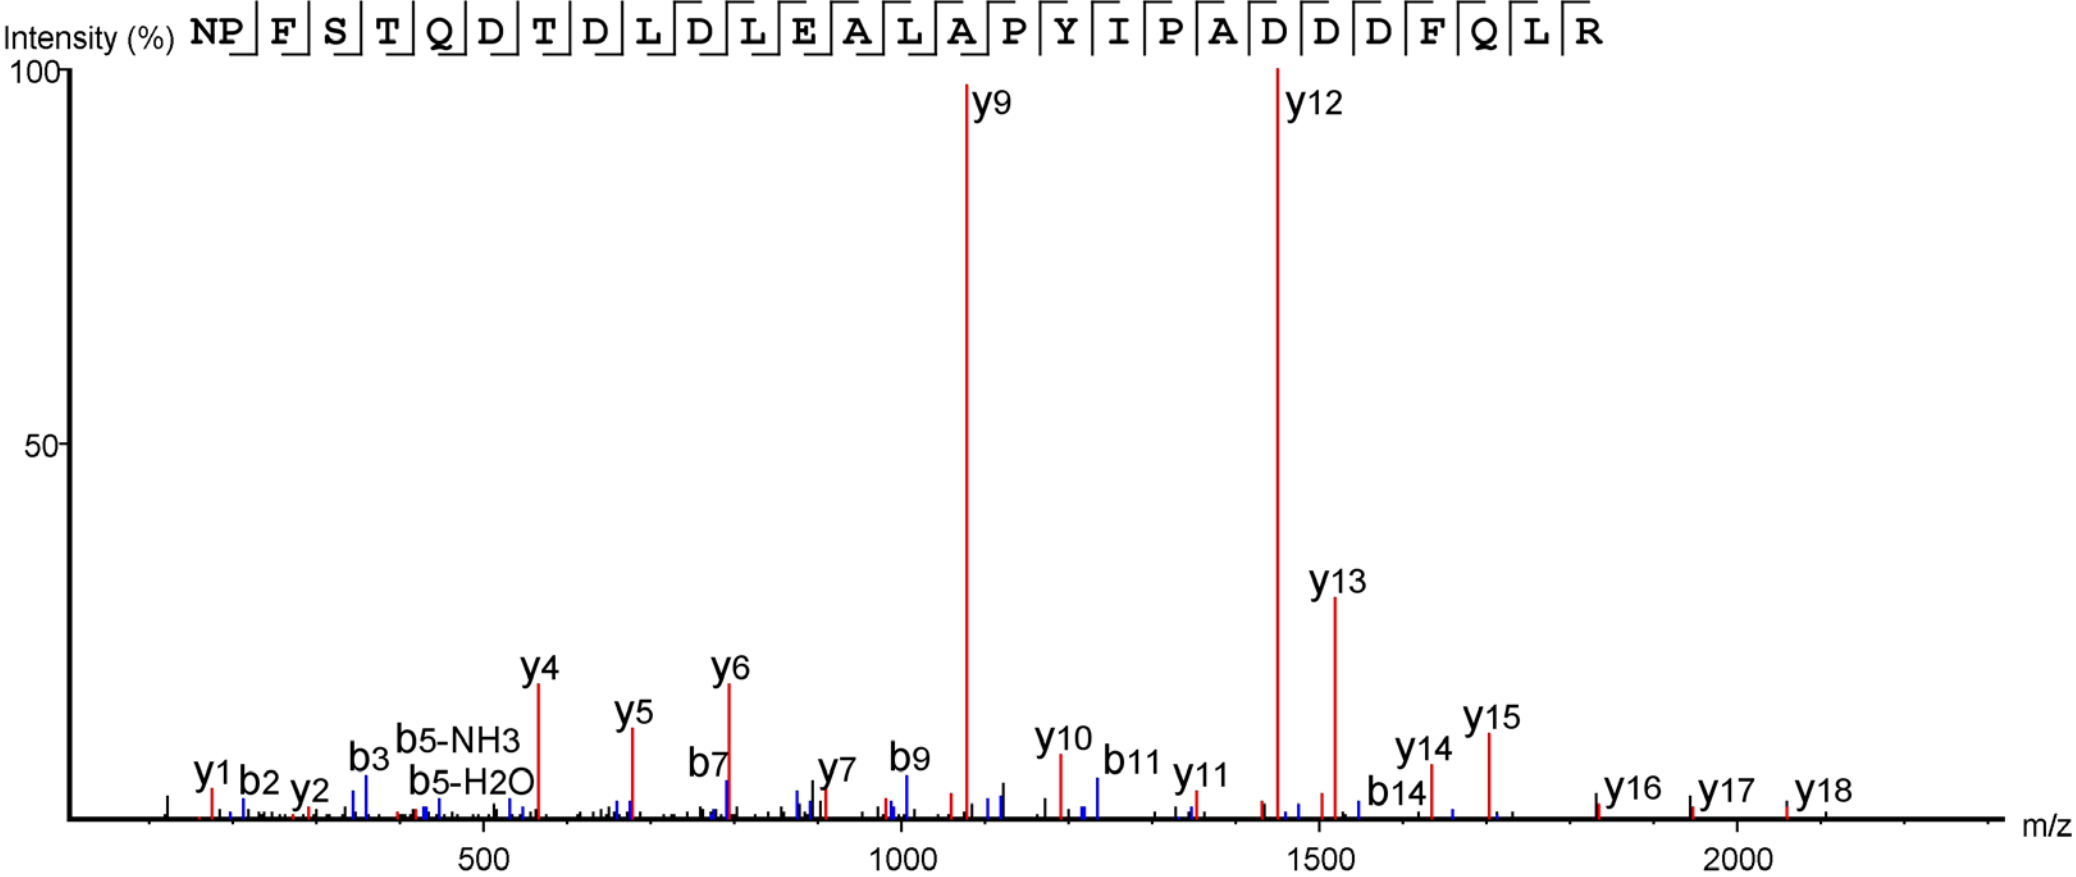

YMT116

Scan #25647

A-319: HIF-1 $\alpha^*$  (548-575): NPFSTQDSDLLEALAPYIPADDDDFQLR

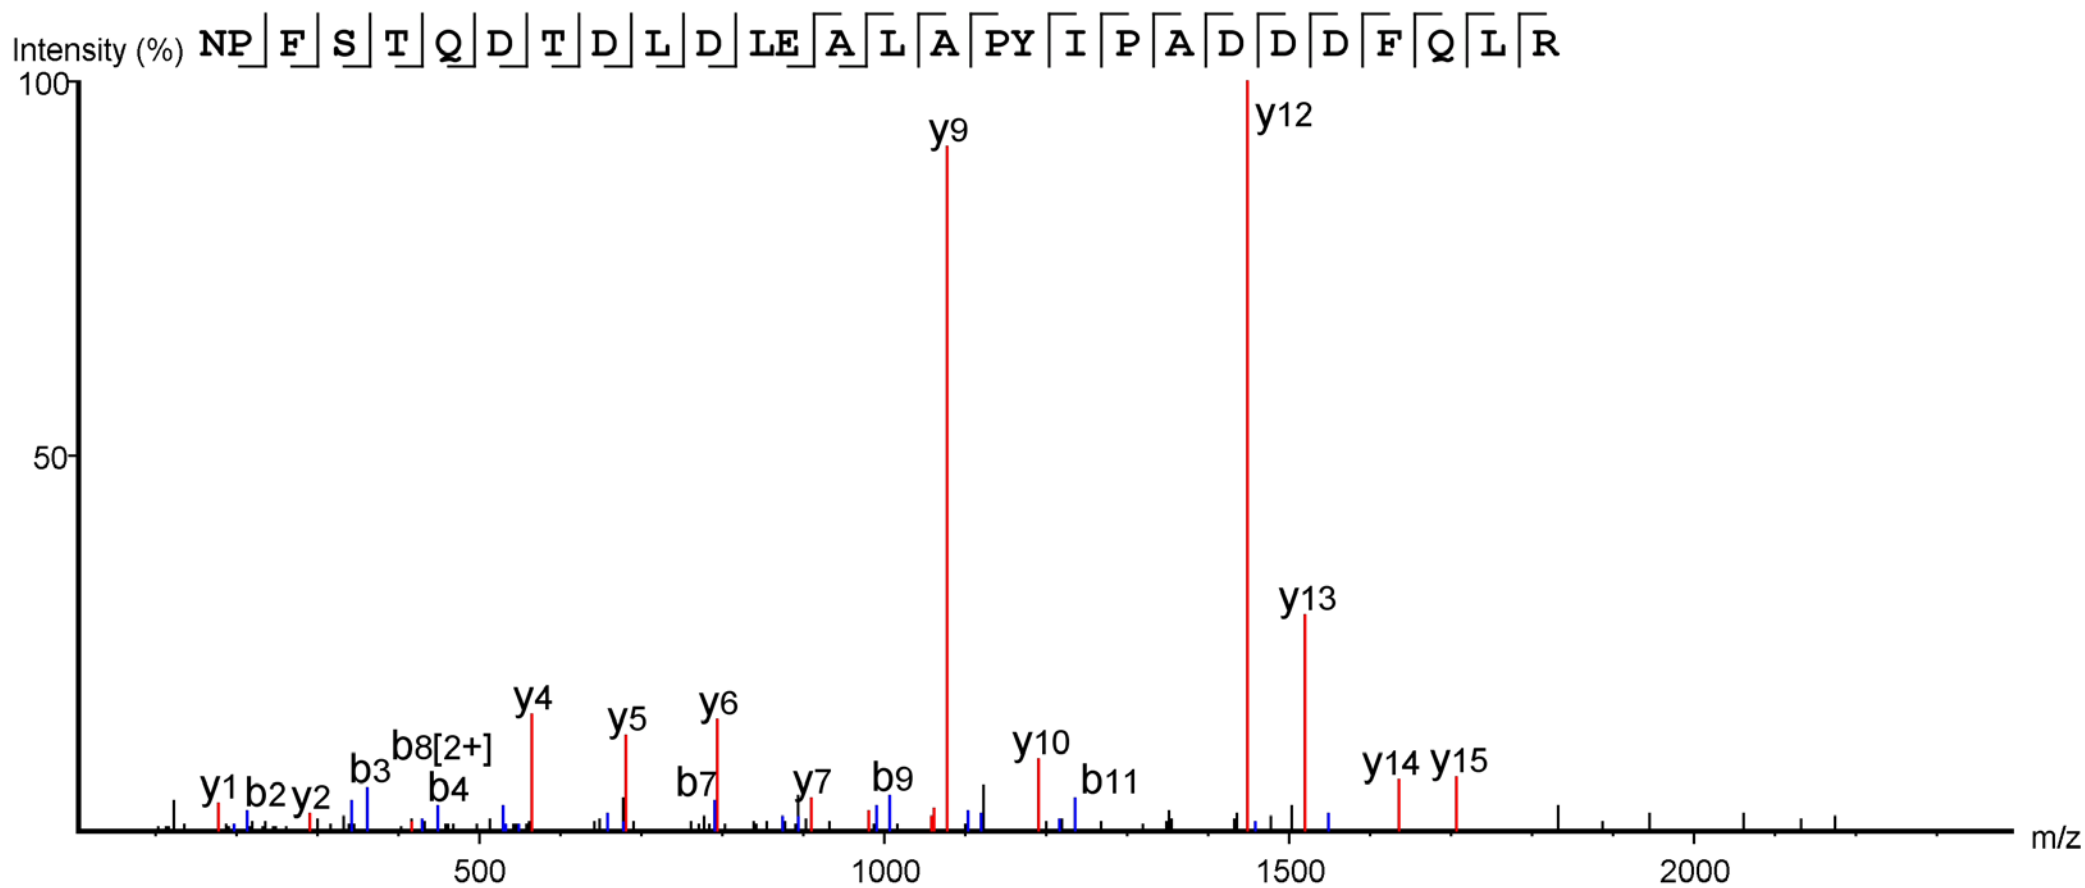

YMT117

Scan #26294

A-320: HIF-1 $\alpha$ \*<sub>(548-575)</sub>: NPFSTQDLDLDLEALAPYIPADDDDFQLR

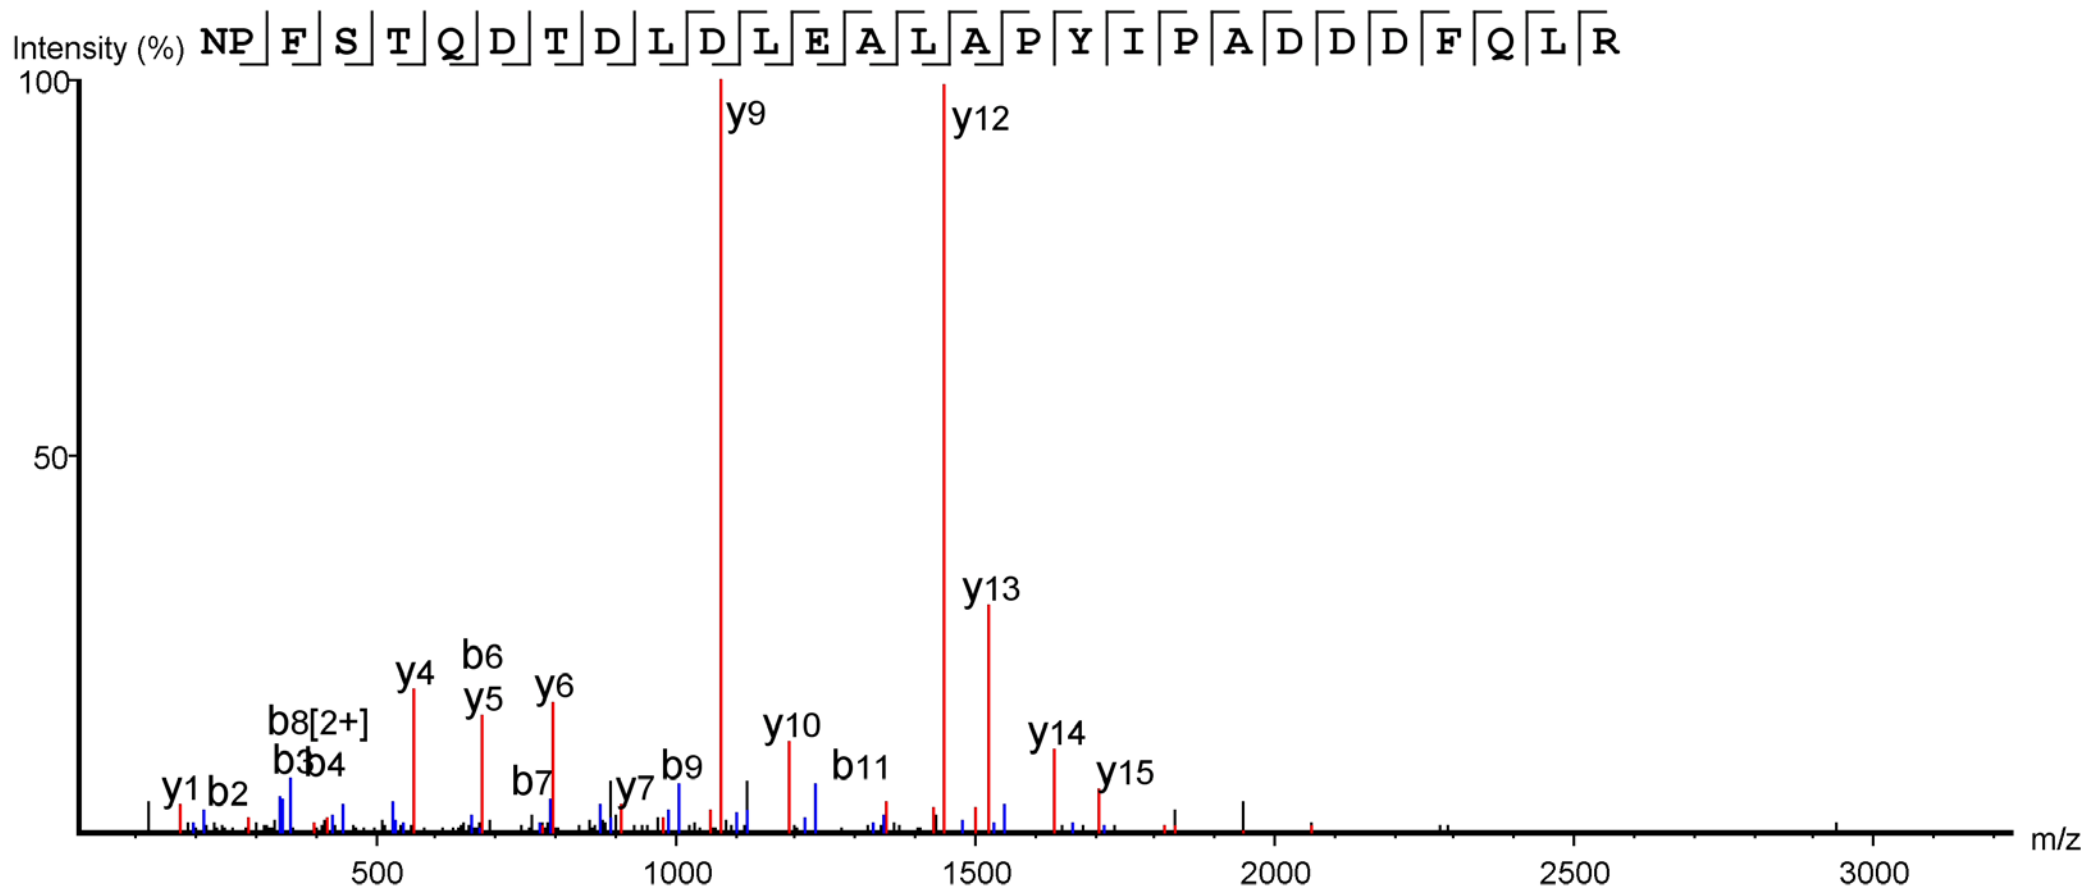

YMT118

Scan #25471



A-321: HIF-1 $\alpha$ \*<sub>(548-575)</sub>: NPFSTQDLDLDLEALAP(+15.99)YIPADDDDFQLR

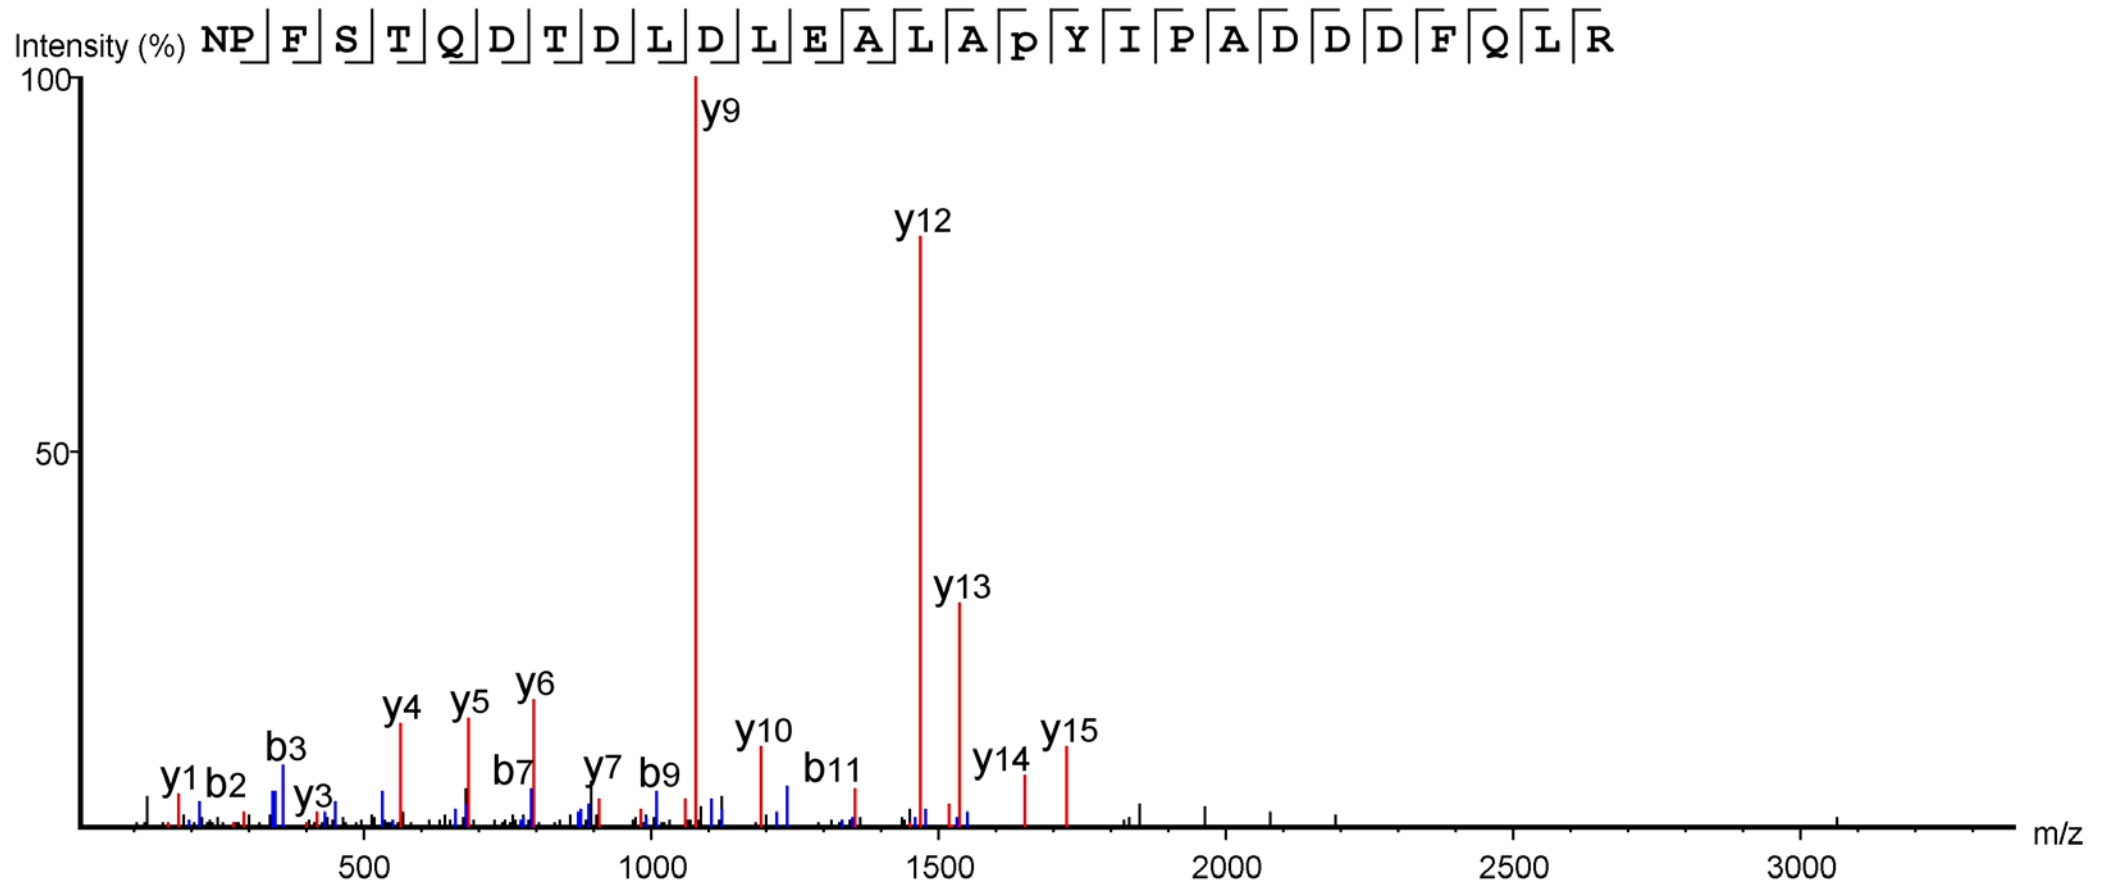

YMT115

Scan #25925

A-322: HIF-1 $\alpha^*$  (548-575): NPFSTQDLDLDLEALAP(+15.99)YIPADDDDFQLR

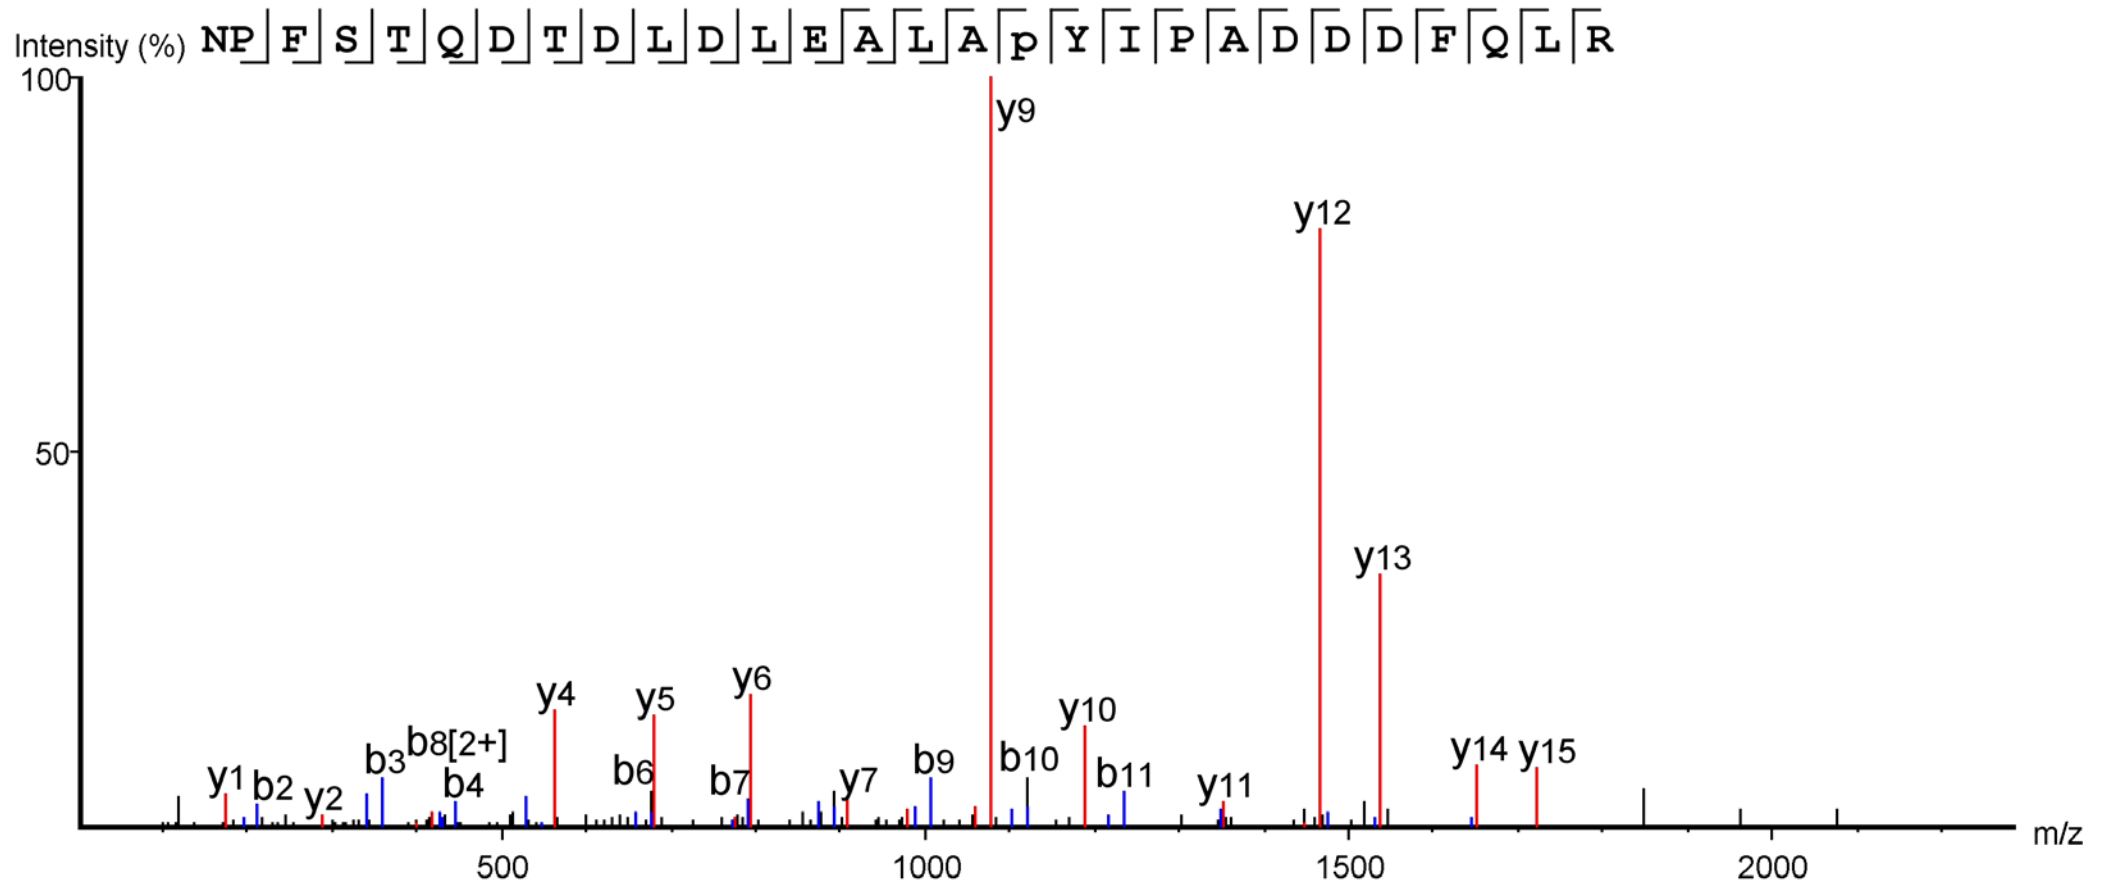

YMT116

Scan #25727

A-323: HIF-1 $\alpha$ \*<sub>(548-575)</sub>: NPFSTQDSDLLEALAP(+15.99)YIPADDDDFQLR

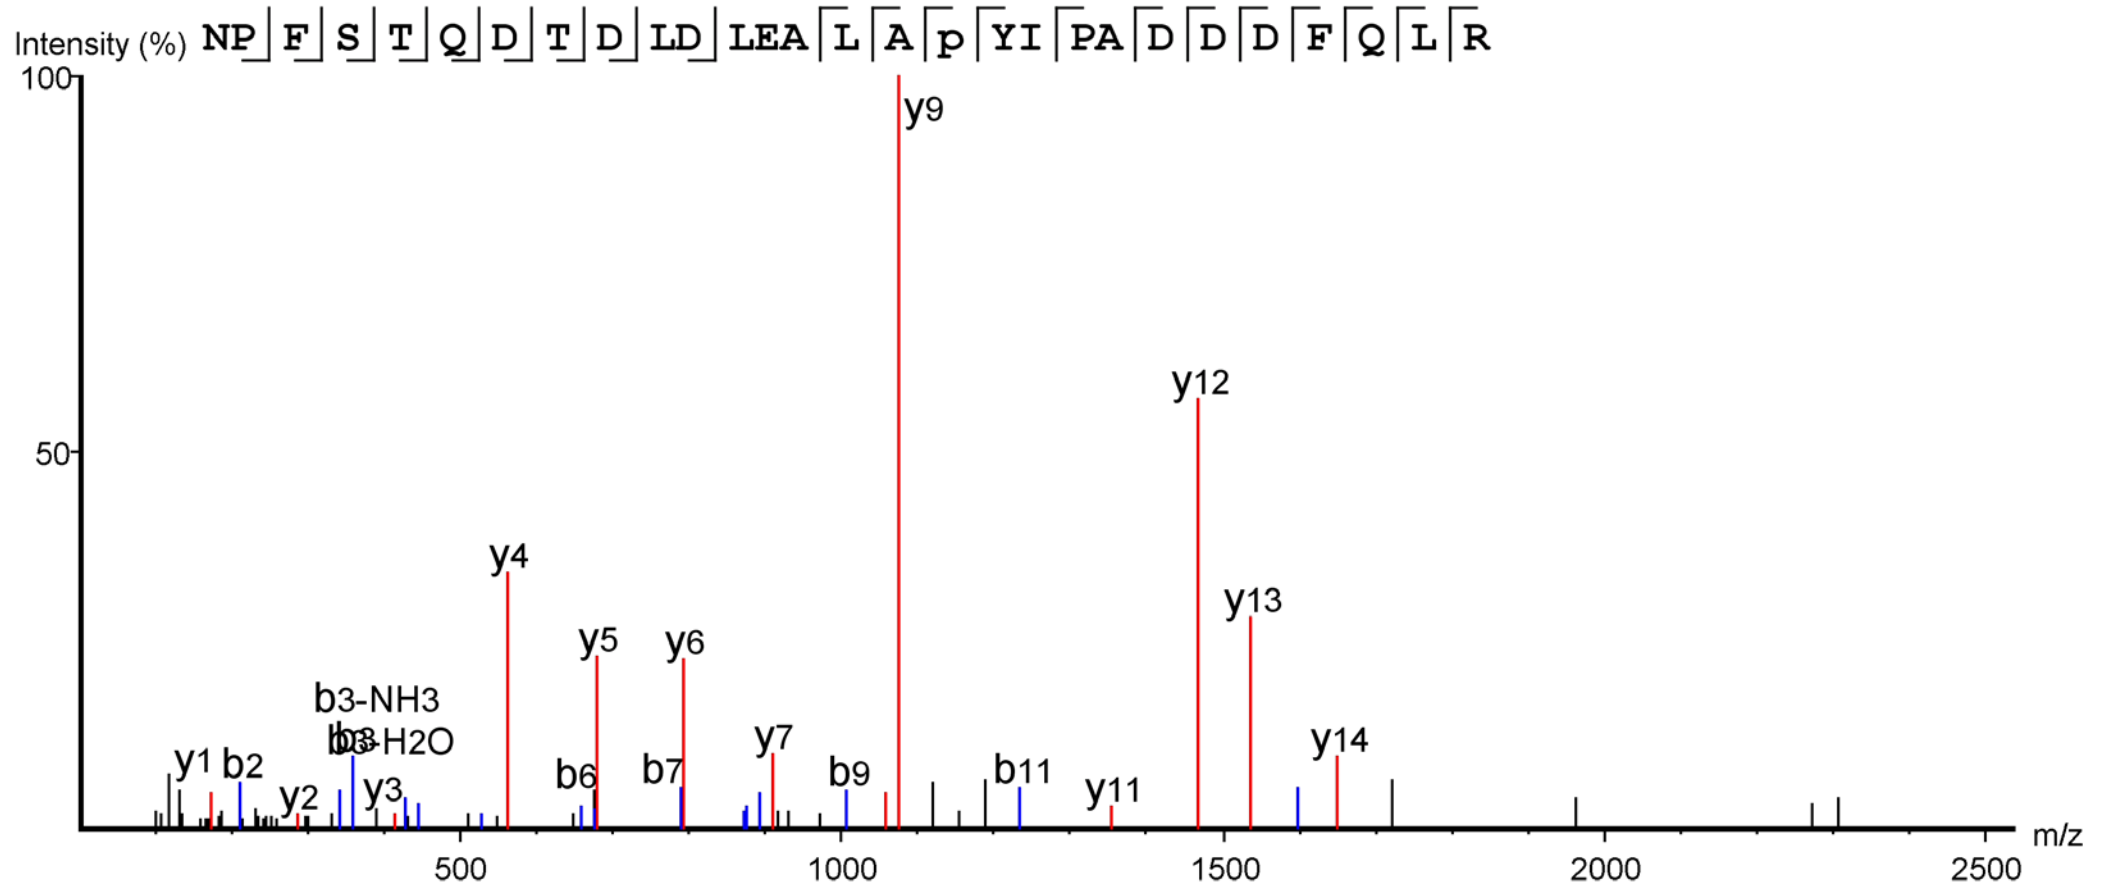

YMT117

Scan #26550

A-324: HIF-1 $\alpha$ \*<sub>(548-575)</sub>: NPFSTQDLDLDLEALAP(+15.99)YIPADDDDFQLR

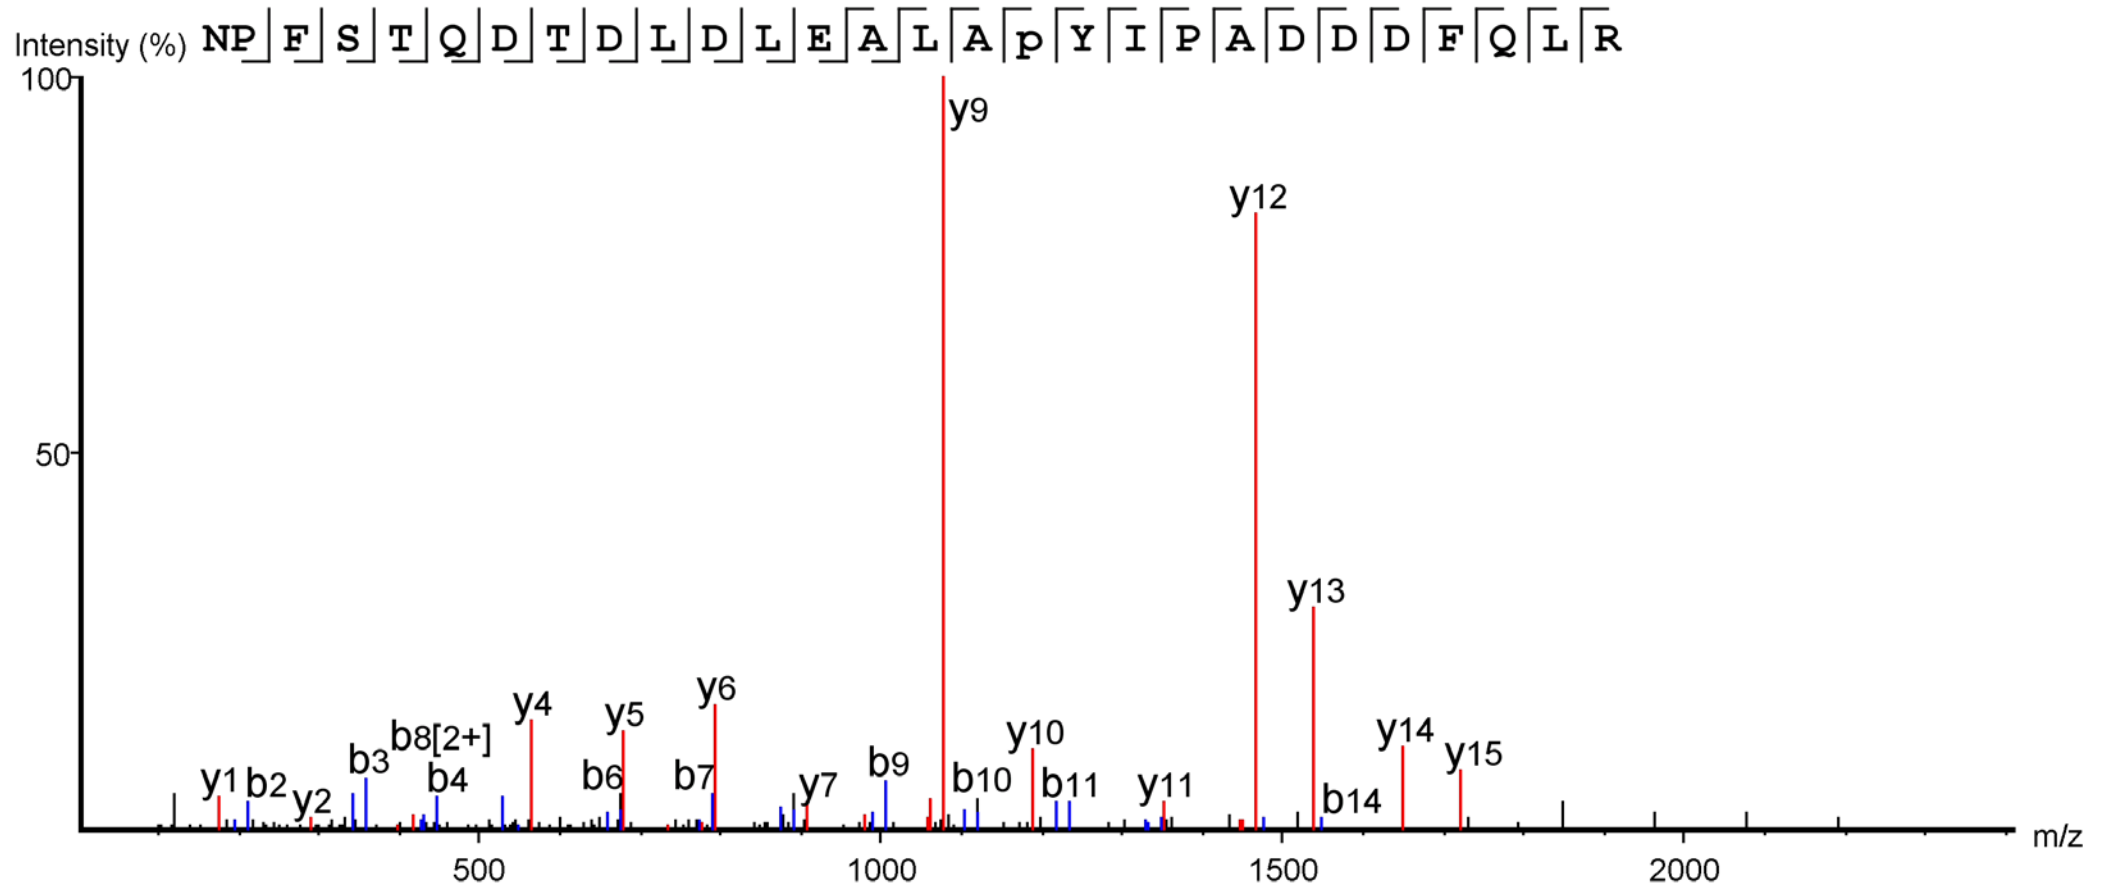

YMT118

Scan #25439

A-325: HIF-1 $\alpha^*$  (392-411): KEPDALTL~~L~~PAAGDTIISL

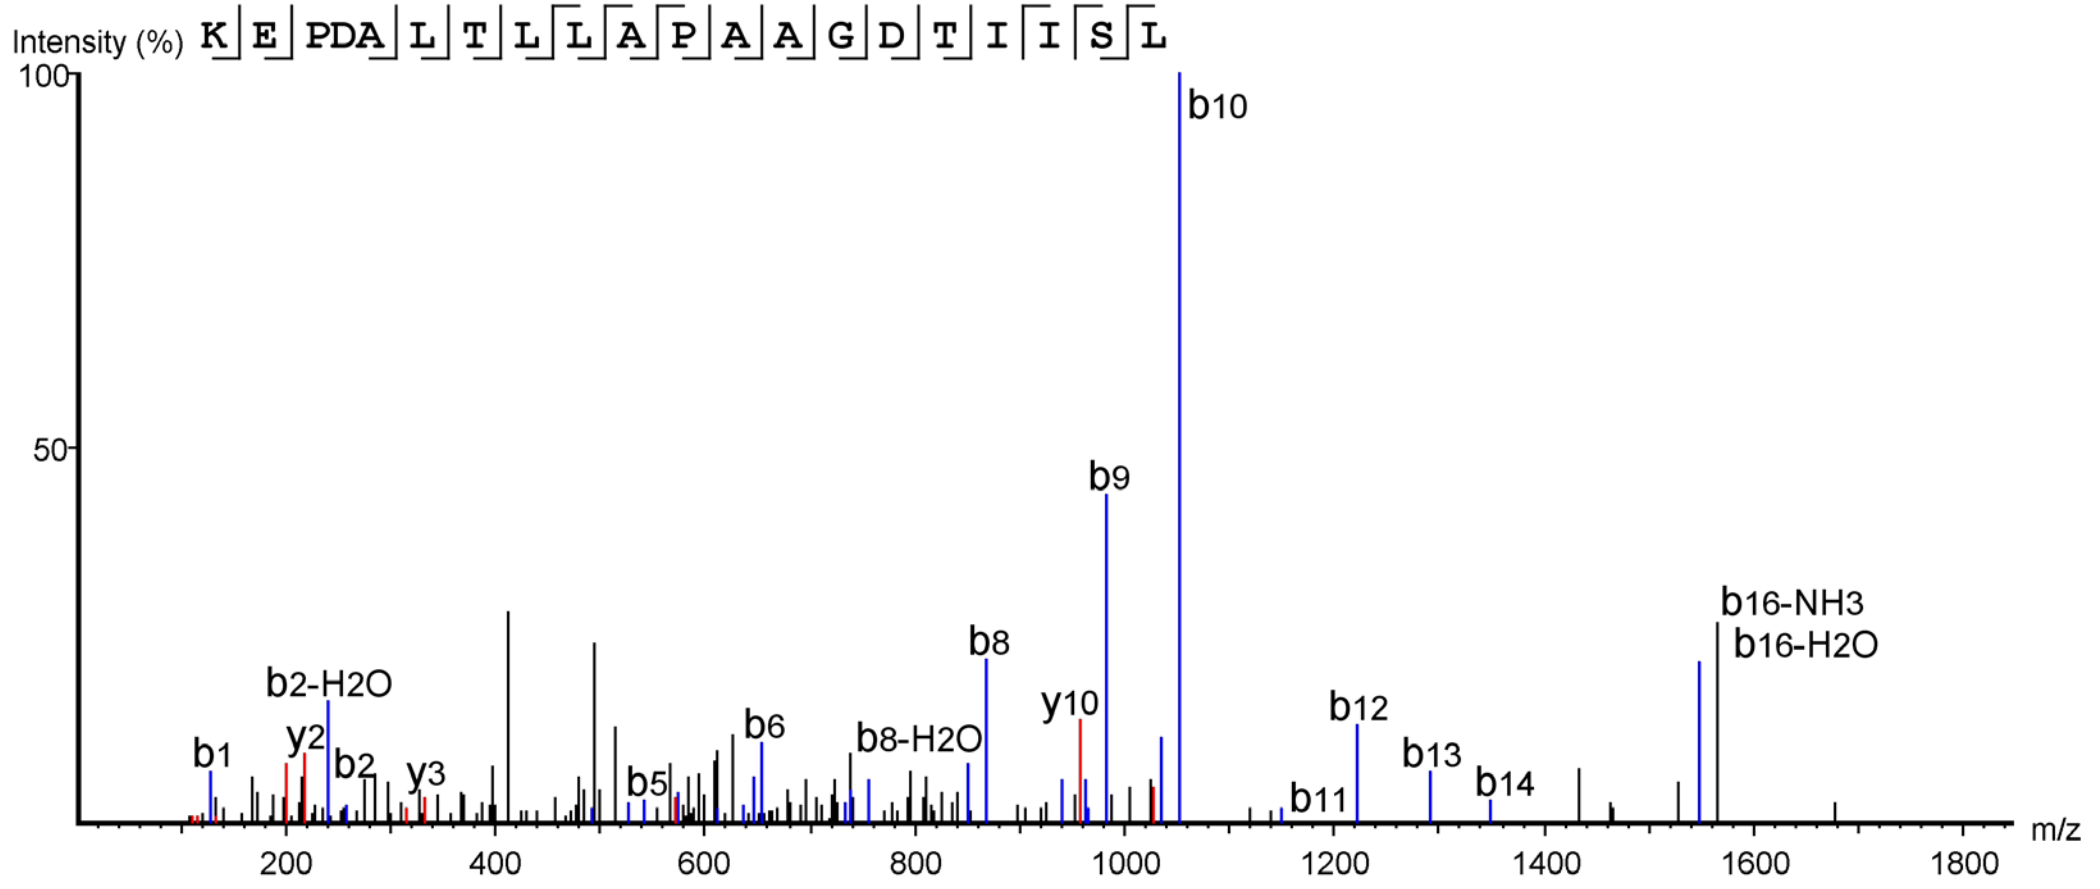

YMT115

Scan #24549

A-326: HIF-1 $\alpha^*$  (392-411): KEPDALTL~~L~~PAAGDTIISL

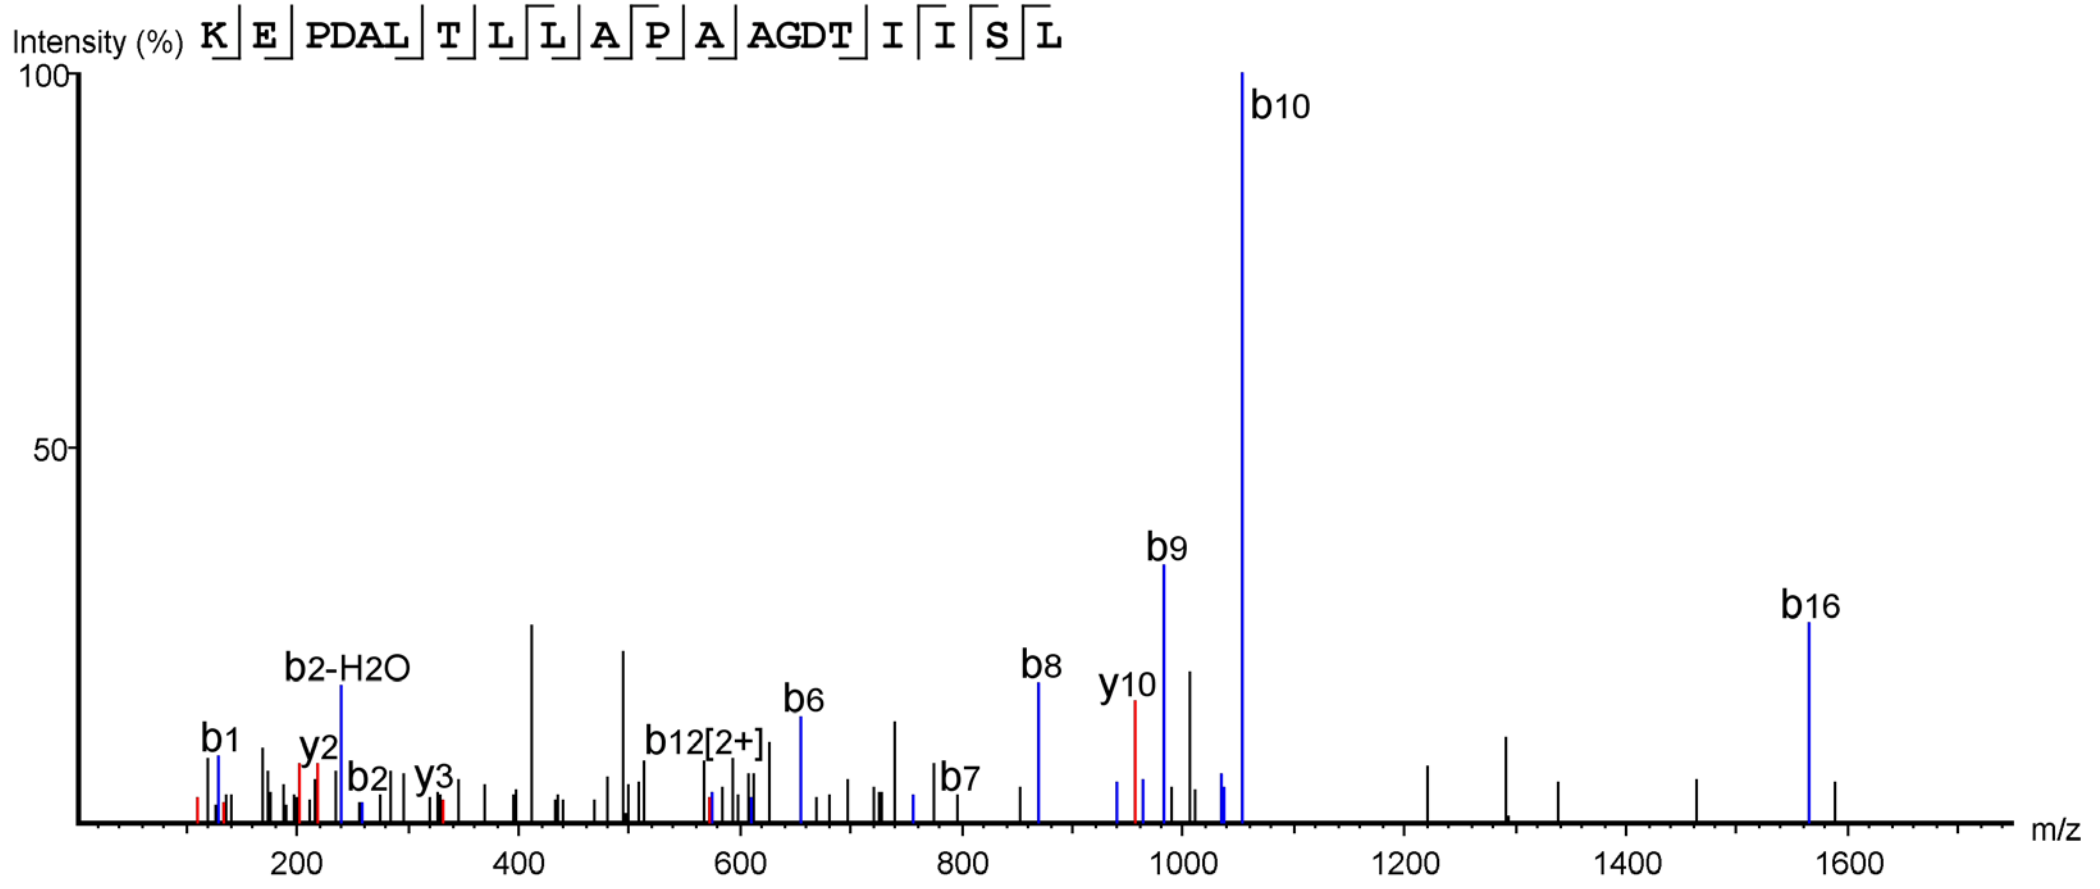

YMT117  
Scan #24846

A-327: HIF-1 $\alpha$ \*<sub>(392-411)</sub>: KEPDALTL LAPAAGDTIISL

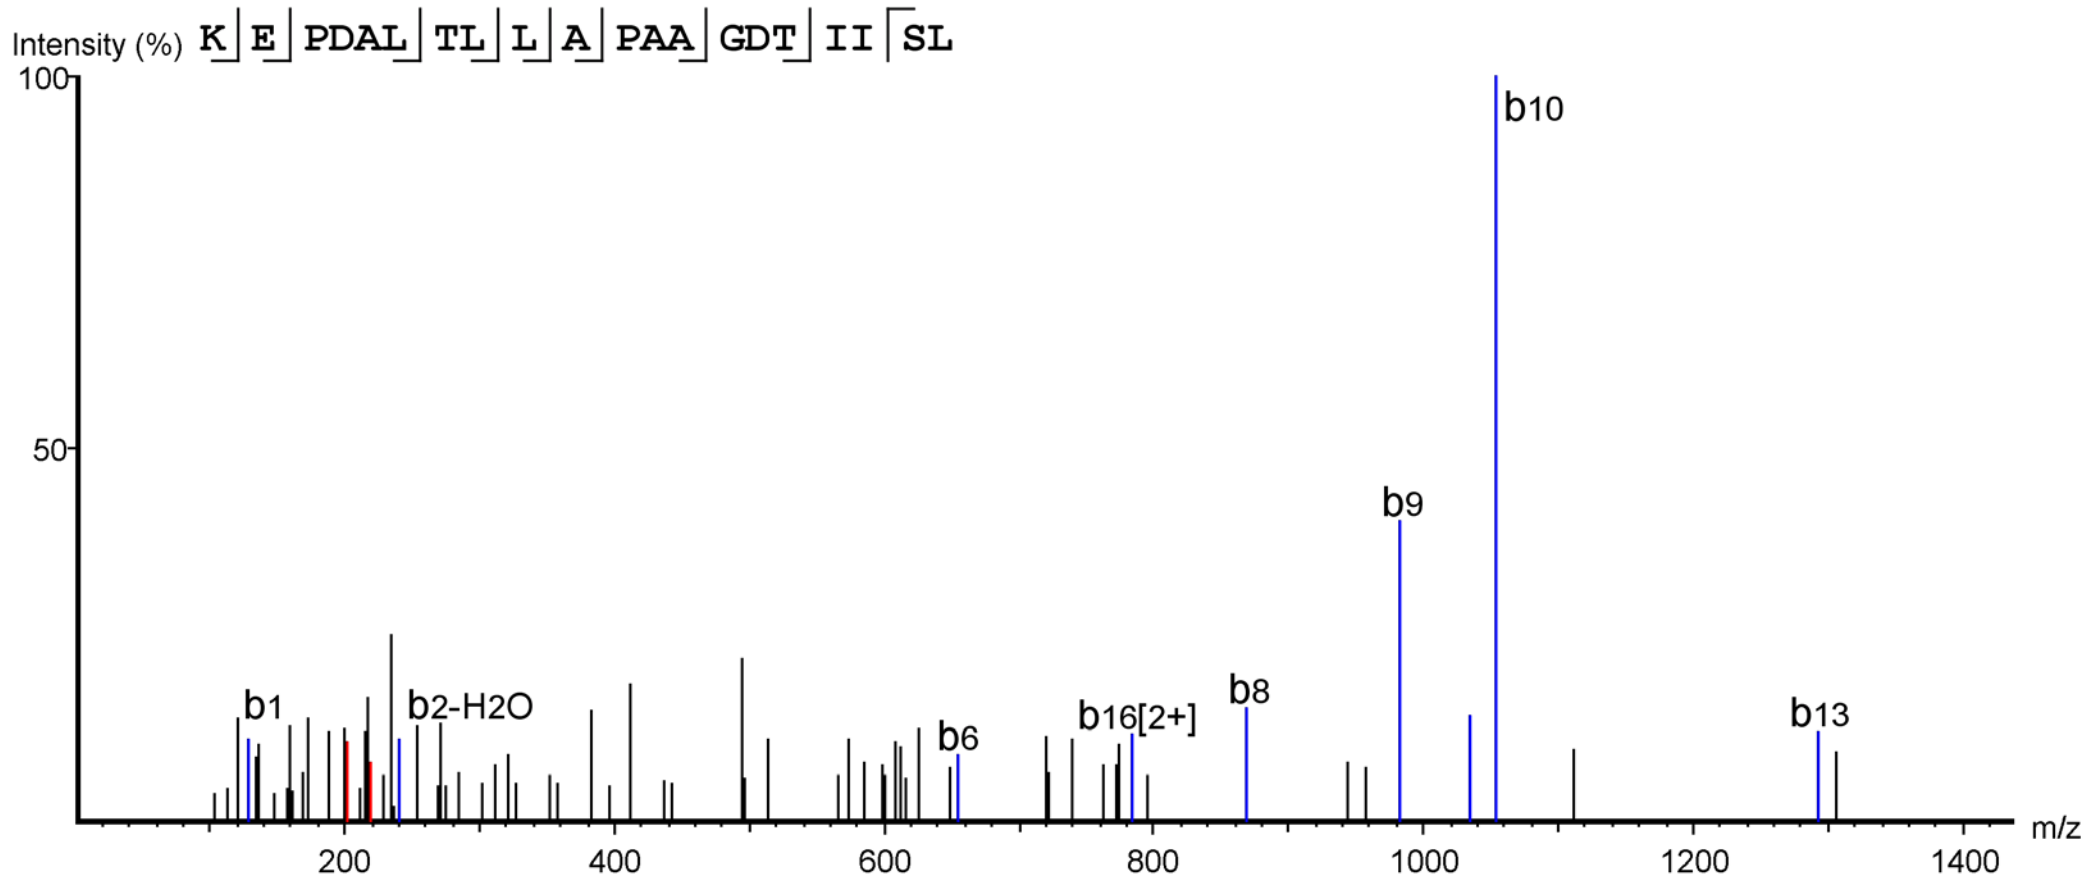

YMT118

Scan #24111

A-328: HIF-1 $\alpha^*$ <sub>(392-411)</sub>: KEPDALTL LAP(+15.99)AAGDTIISL

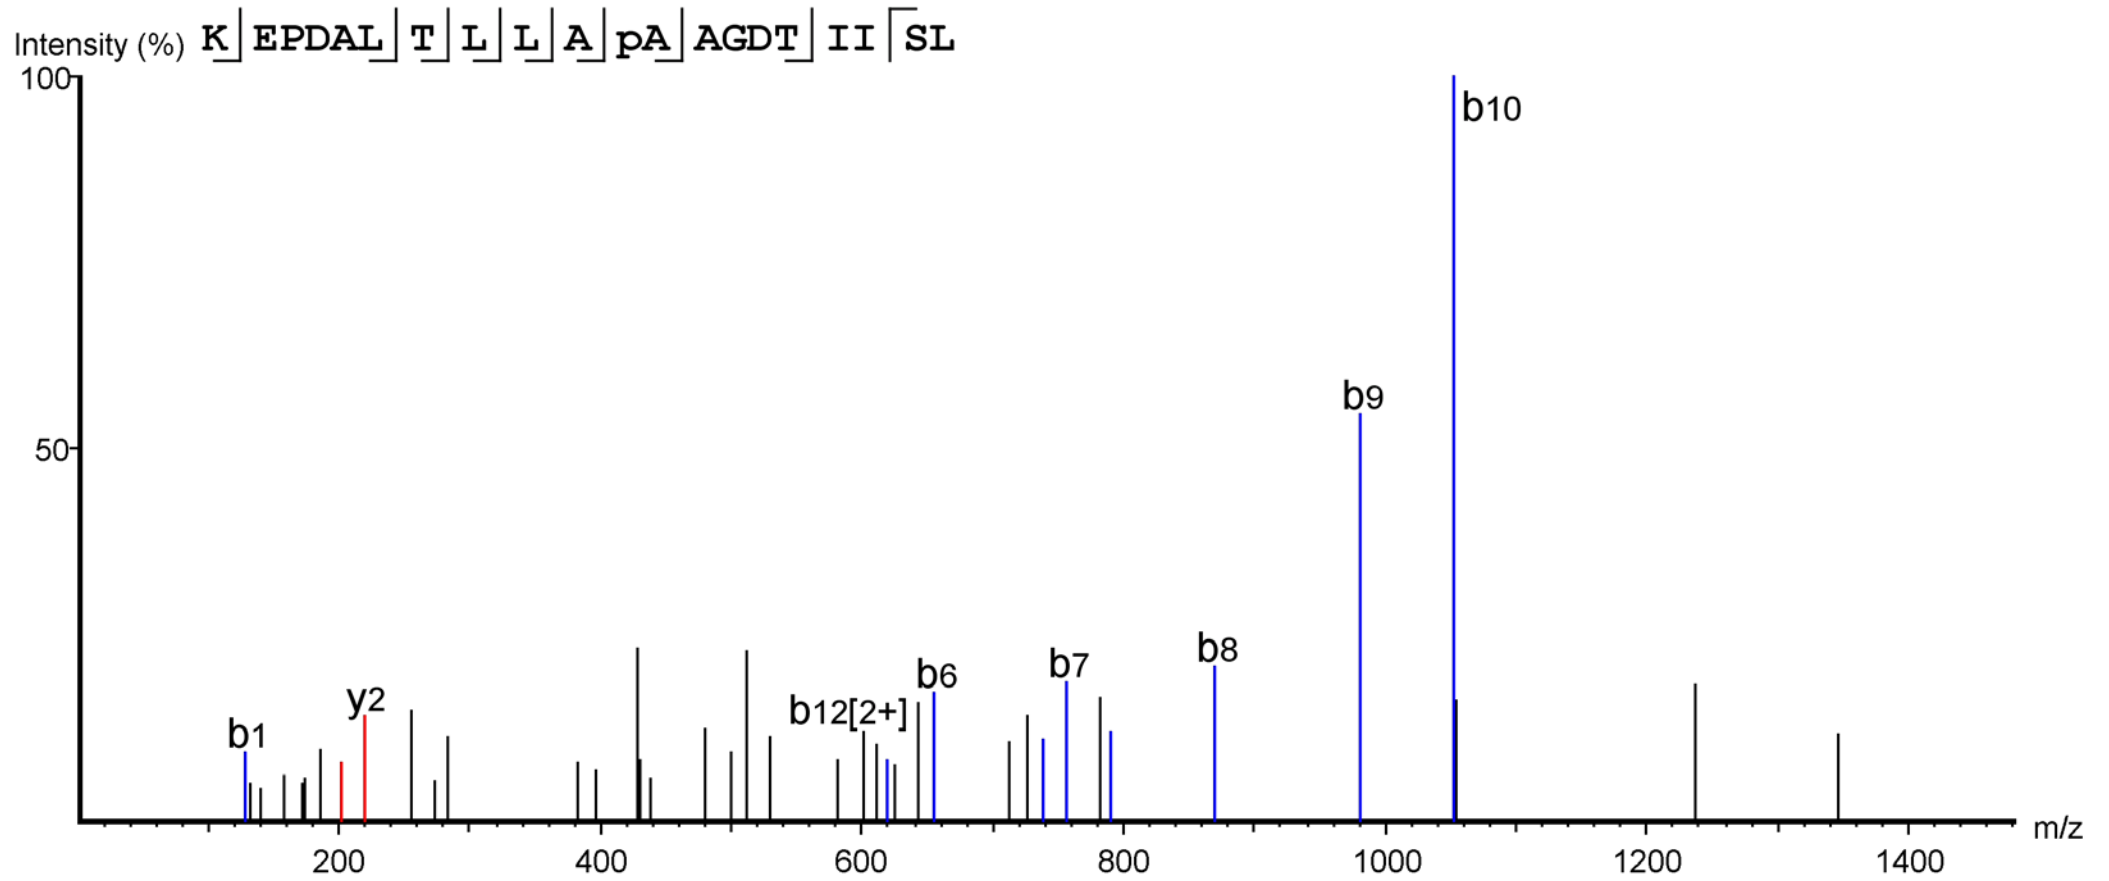

YMT115

Scan #23781



A-329: HIF-1 $\alpha^*$ <sub>(392-411)</sub>: KEPDALTLLAP(+15.99)AAGDTIISL

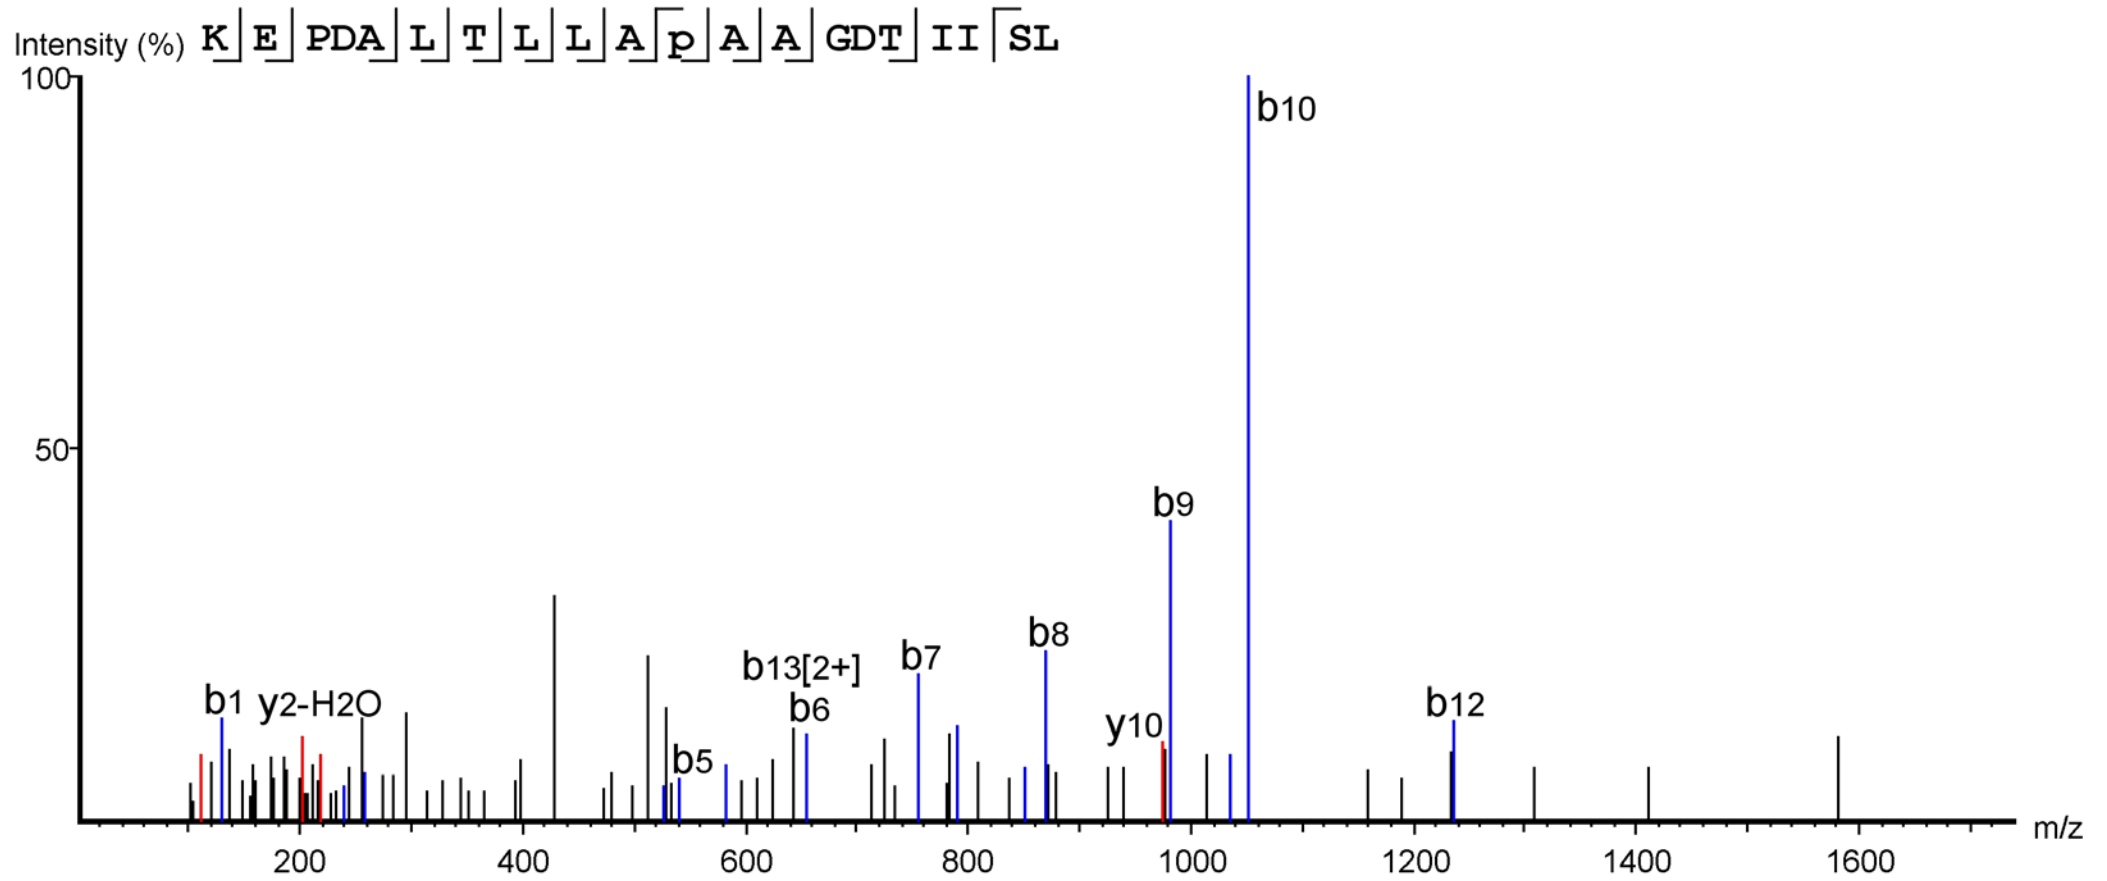

YMT116

Scan #23537

A-330: HIF-1 $\alpha^*$ <sub>(392-411)</sub>: KEPDALTLLAP(+15.99)AAGDTIISL

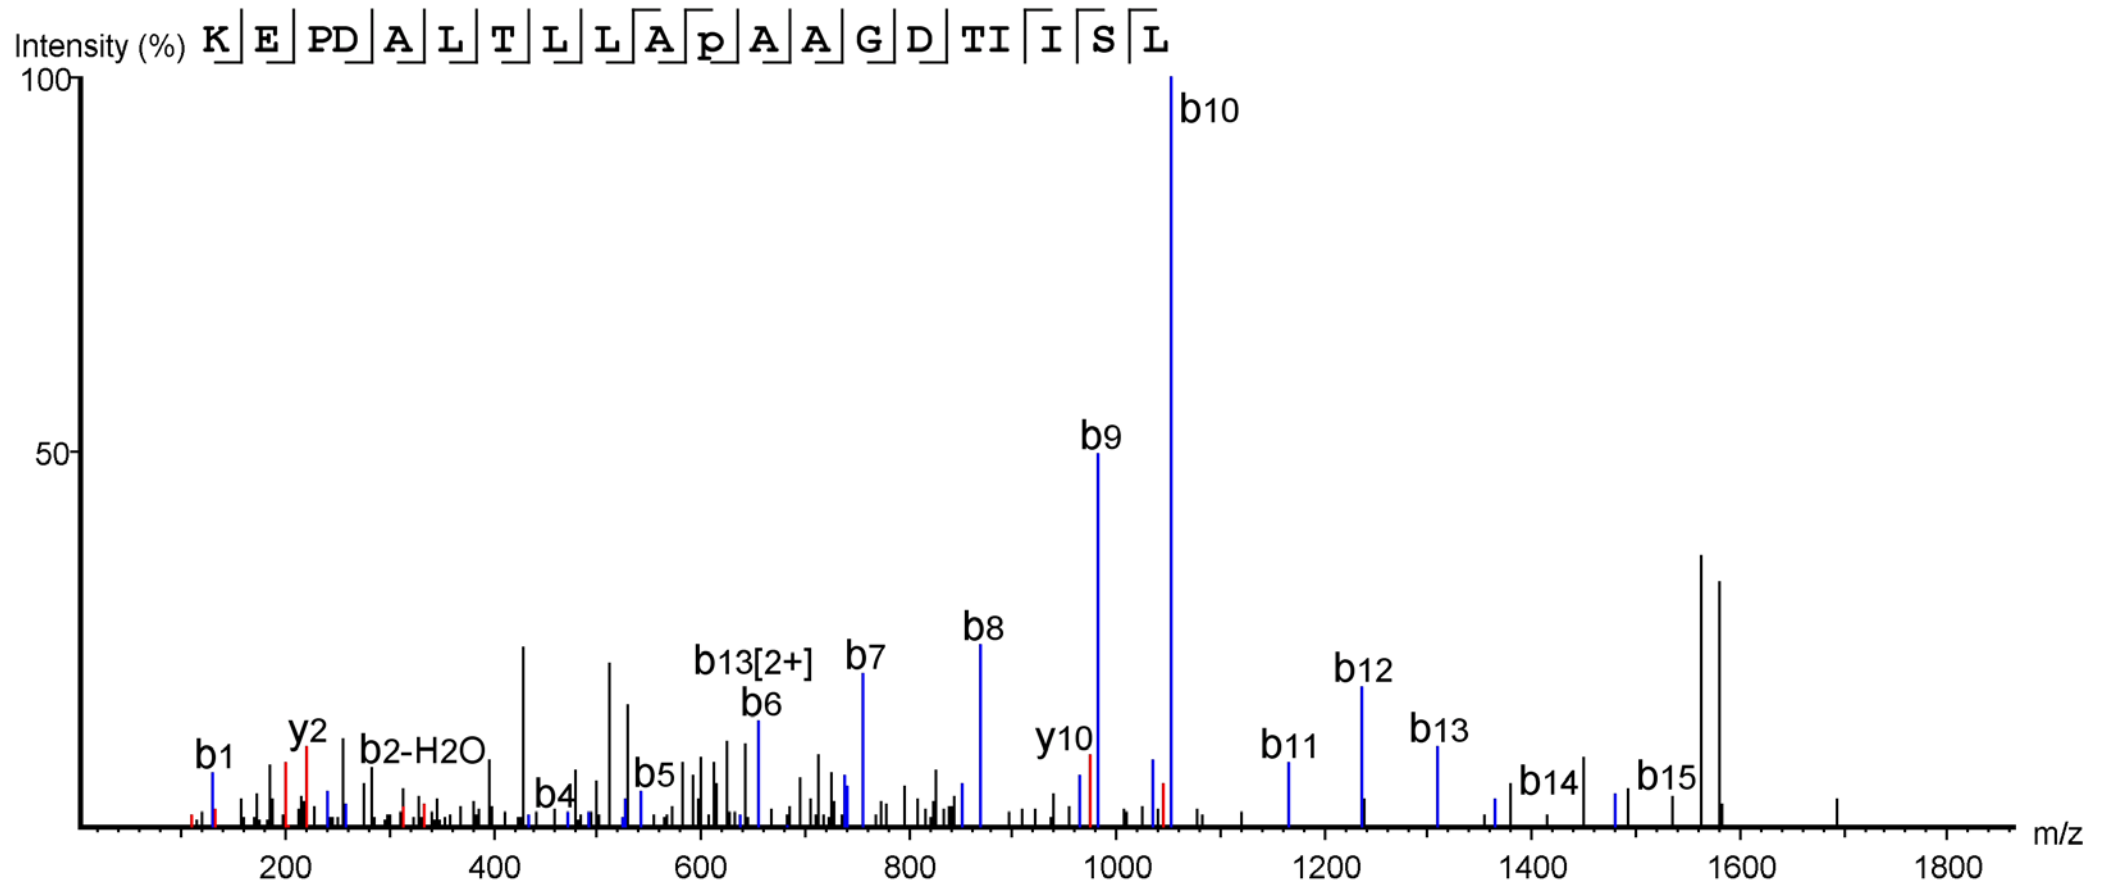

YMT117

Scan #24118

A-331: HIF-2 $\alpha$ (513-550): DQC(+57.02)STQTDNFNELDLETLAPYI<sup>P</sup>PMDGEDFQLSPIC(+57.02)PEER

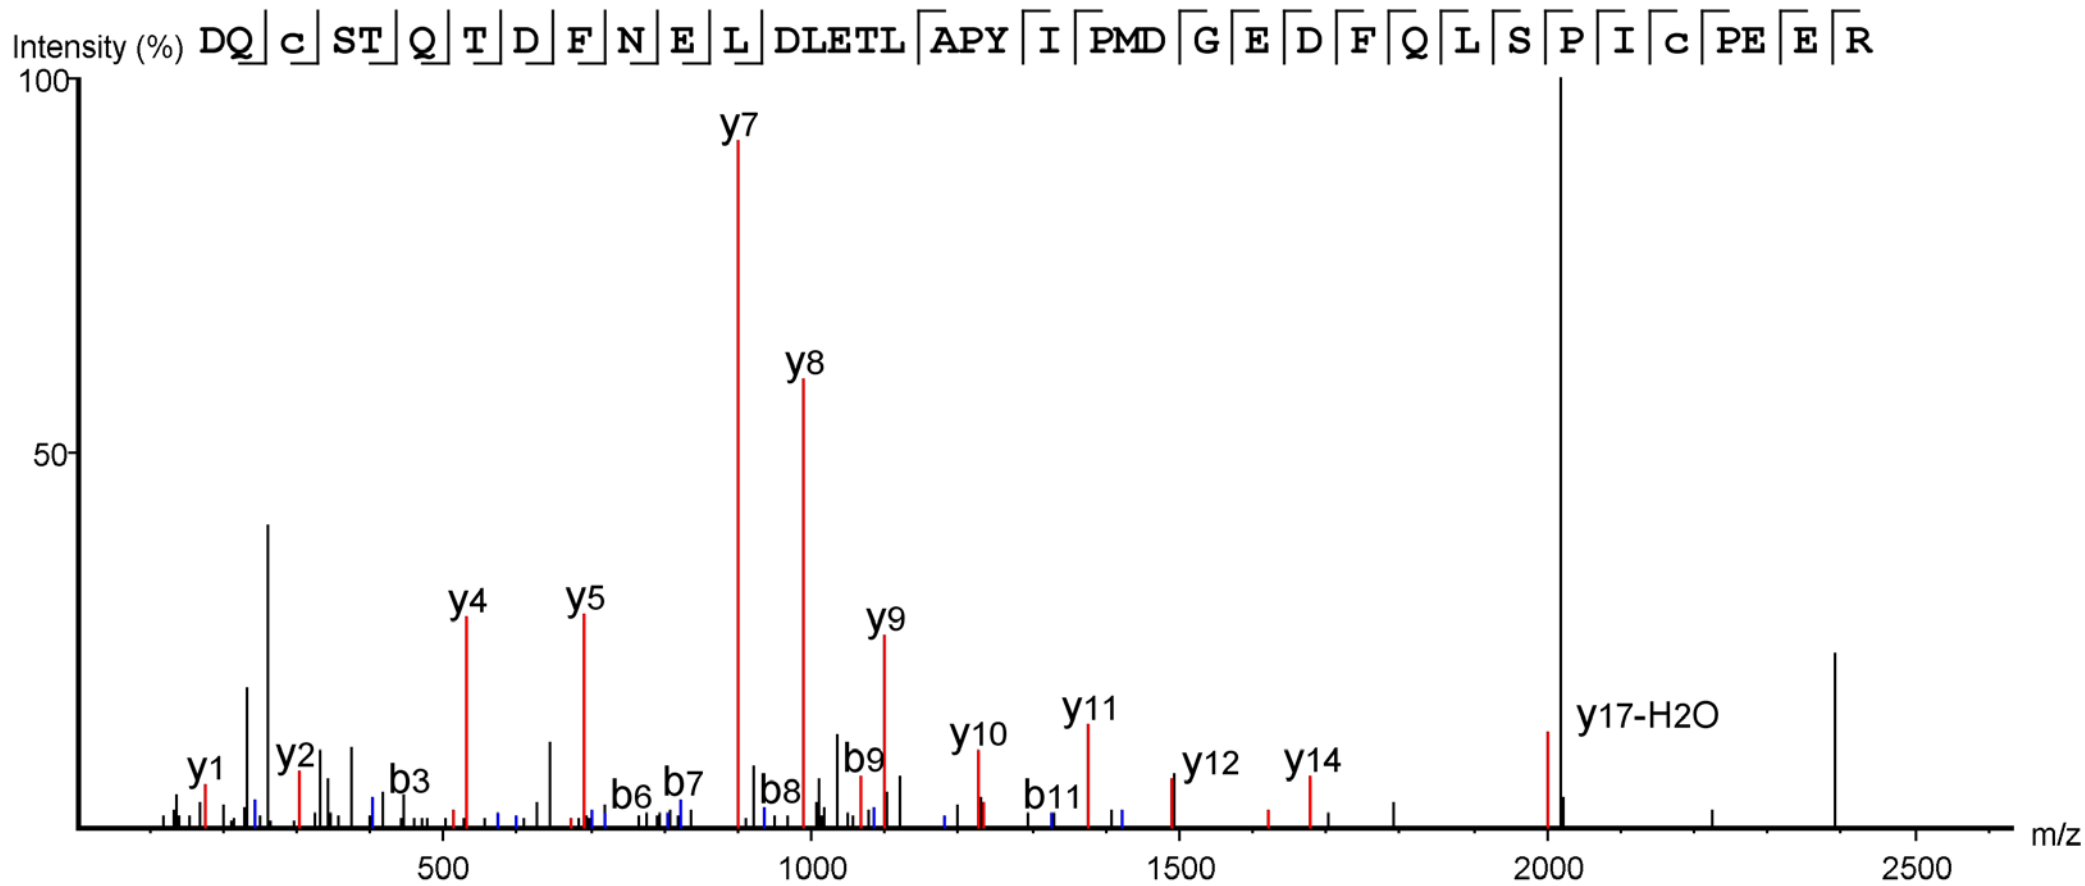

YMT119

Scan #28244

A-332: HIF-2 $\alpha$ (513-550): DQC(+57.02)STQTDFNELDLETLA PYIPMDGEDFQLSPIC(+57.02)PEER

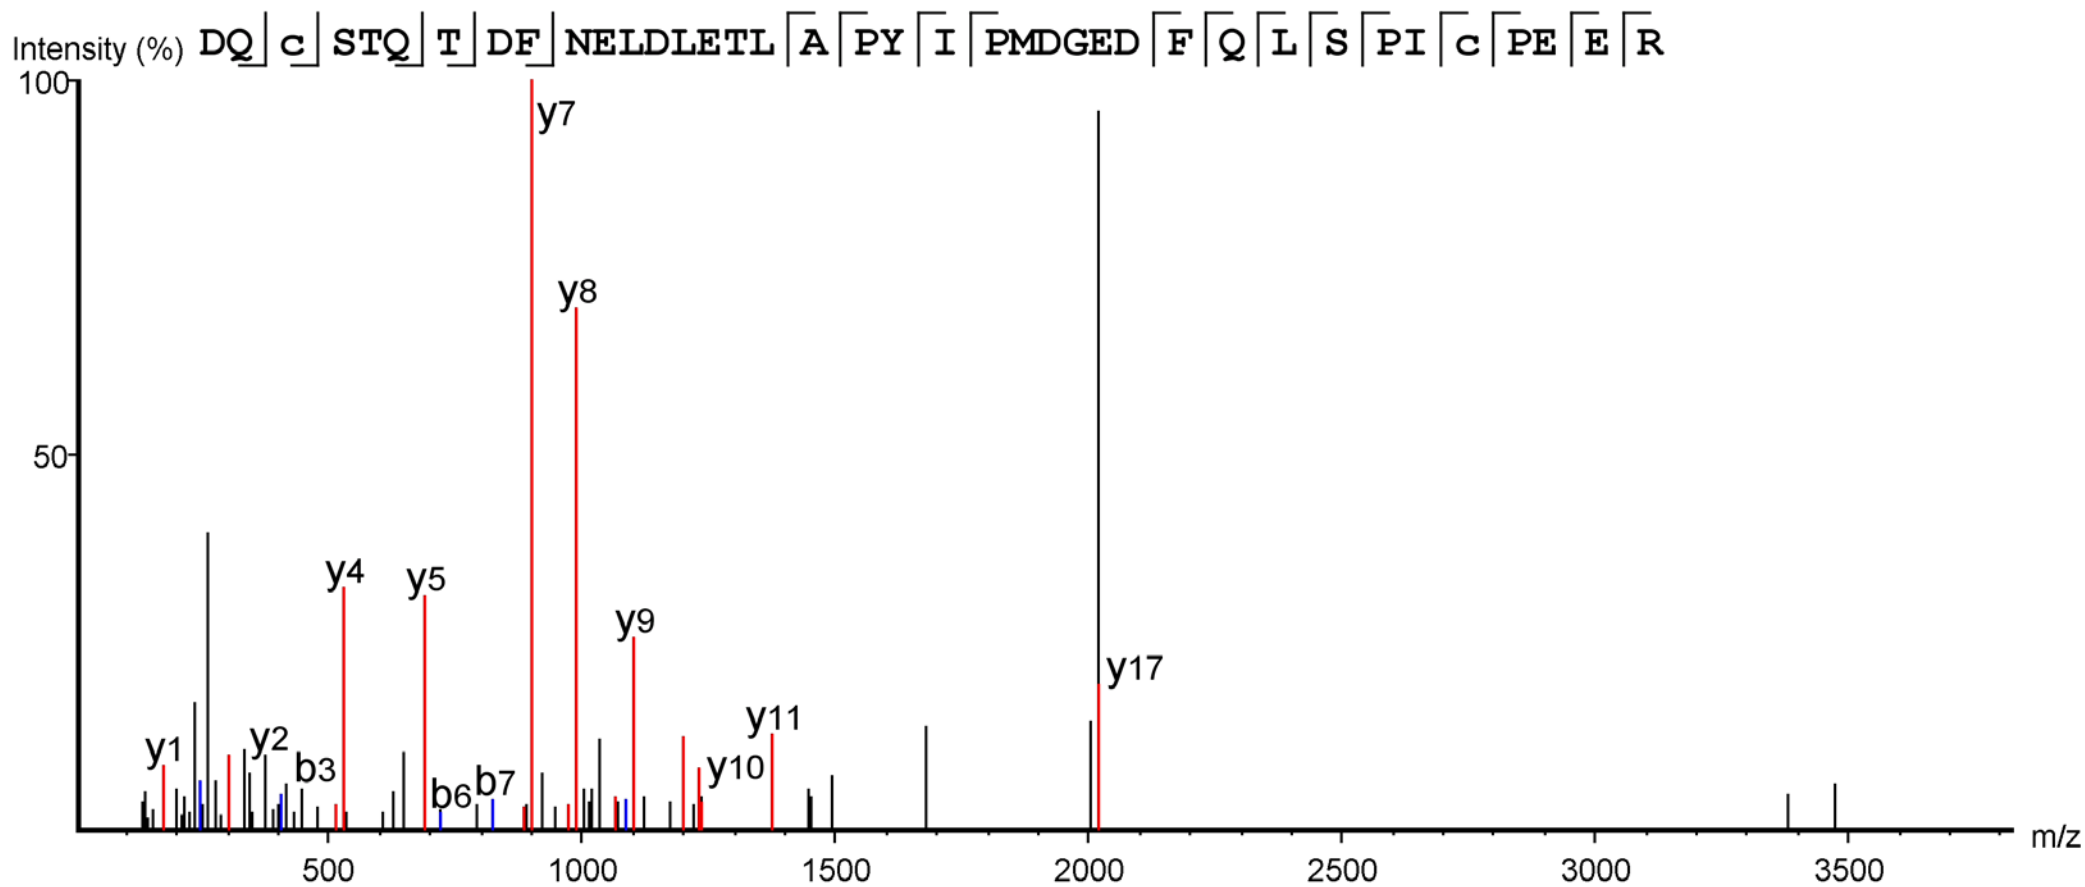

YMT120

Scan #27851

A-333: HIF-2 $\alpha$ (513-550): DQC(+57.02)STQTD~~F~~NELDLETLAPYI[PMD]GED[F]Q[L]S[PI]C[PE]E[R]

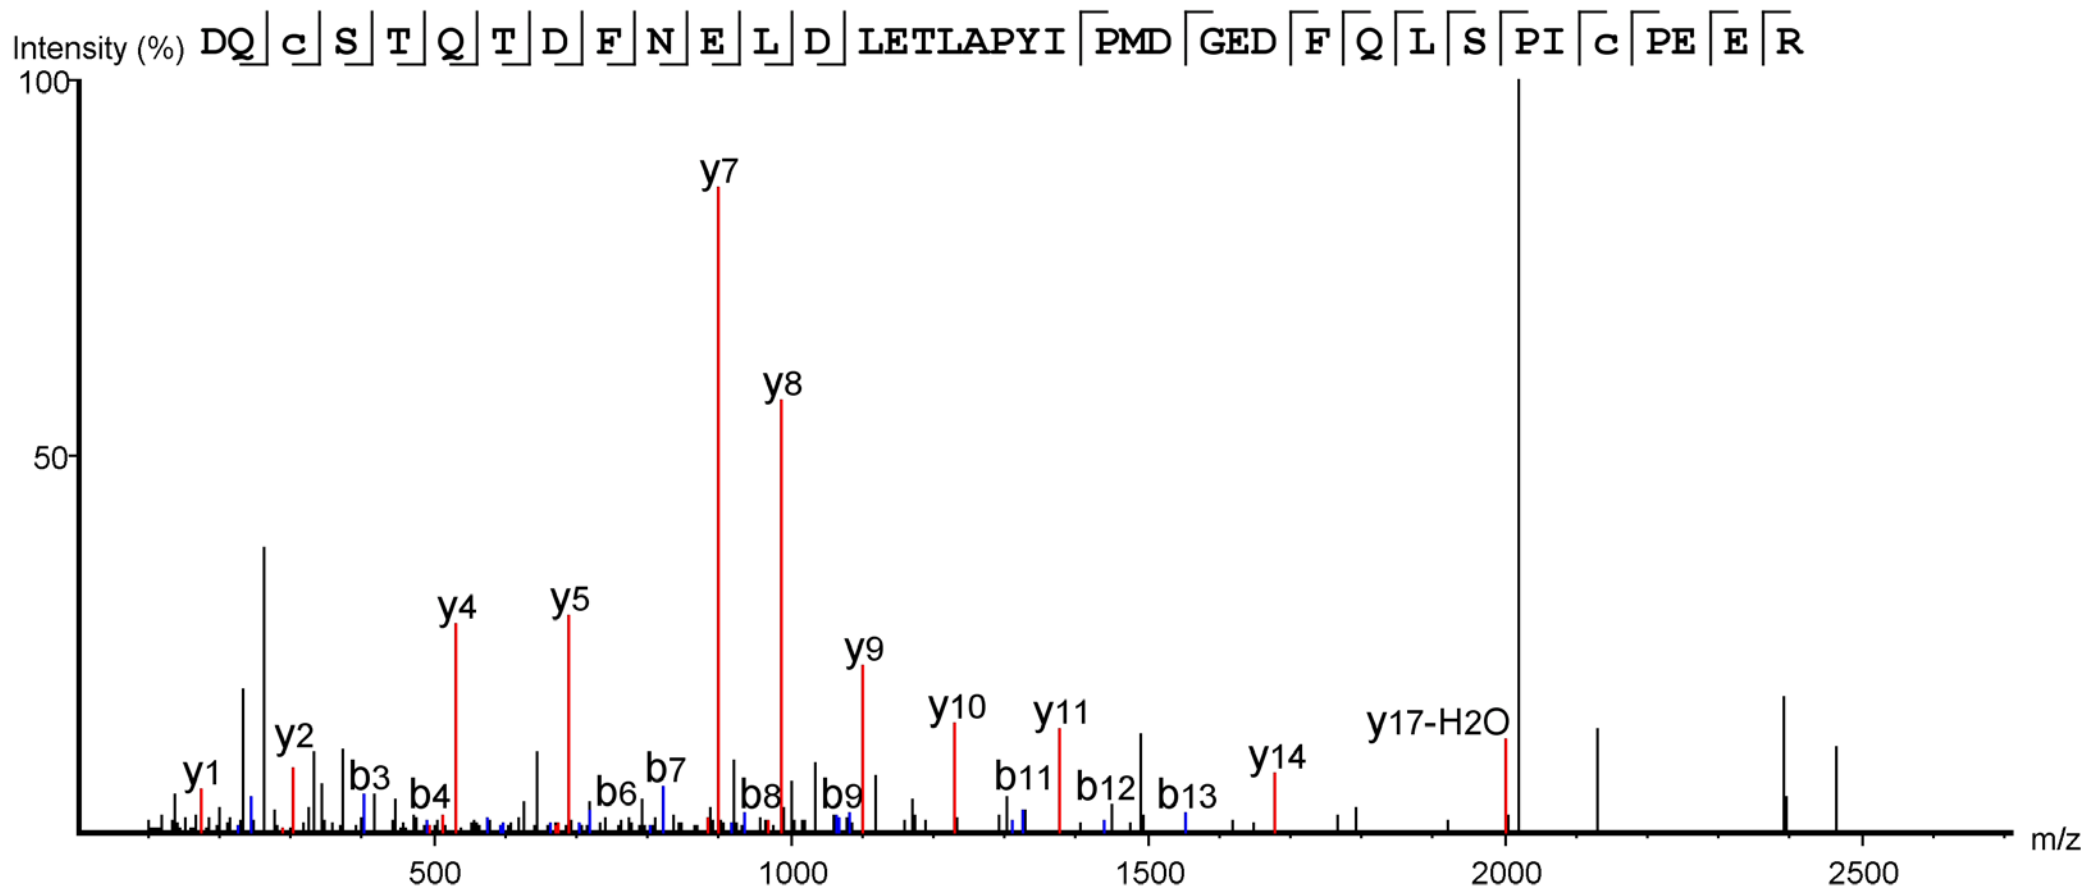

YMT121

Scan #27960

A-334: HIF-2 $\alpha$ <sub>(513-550)</sub>: DQC(+57.02)STQTDFNELDLETLAPYIPMDGEDFQLSPIC(+57.02)PEER

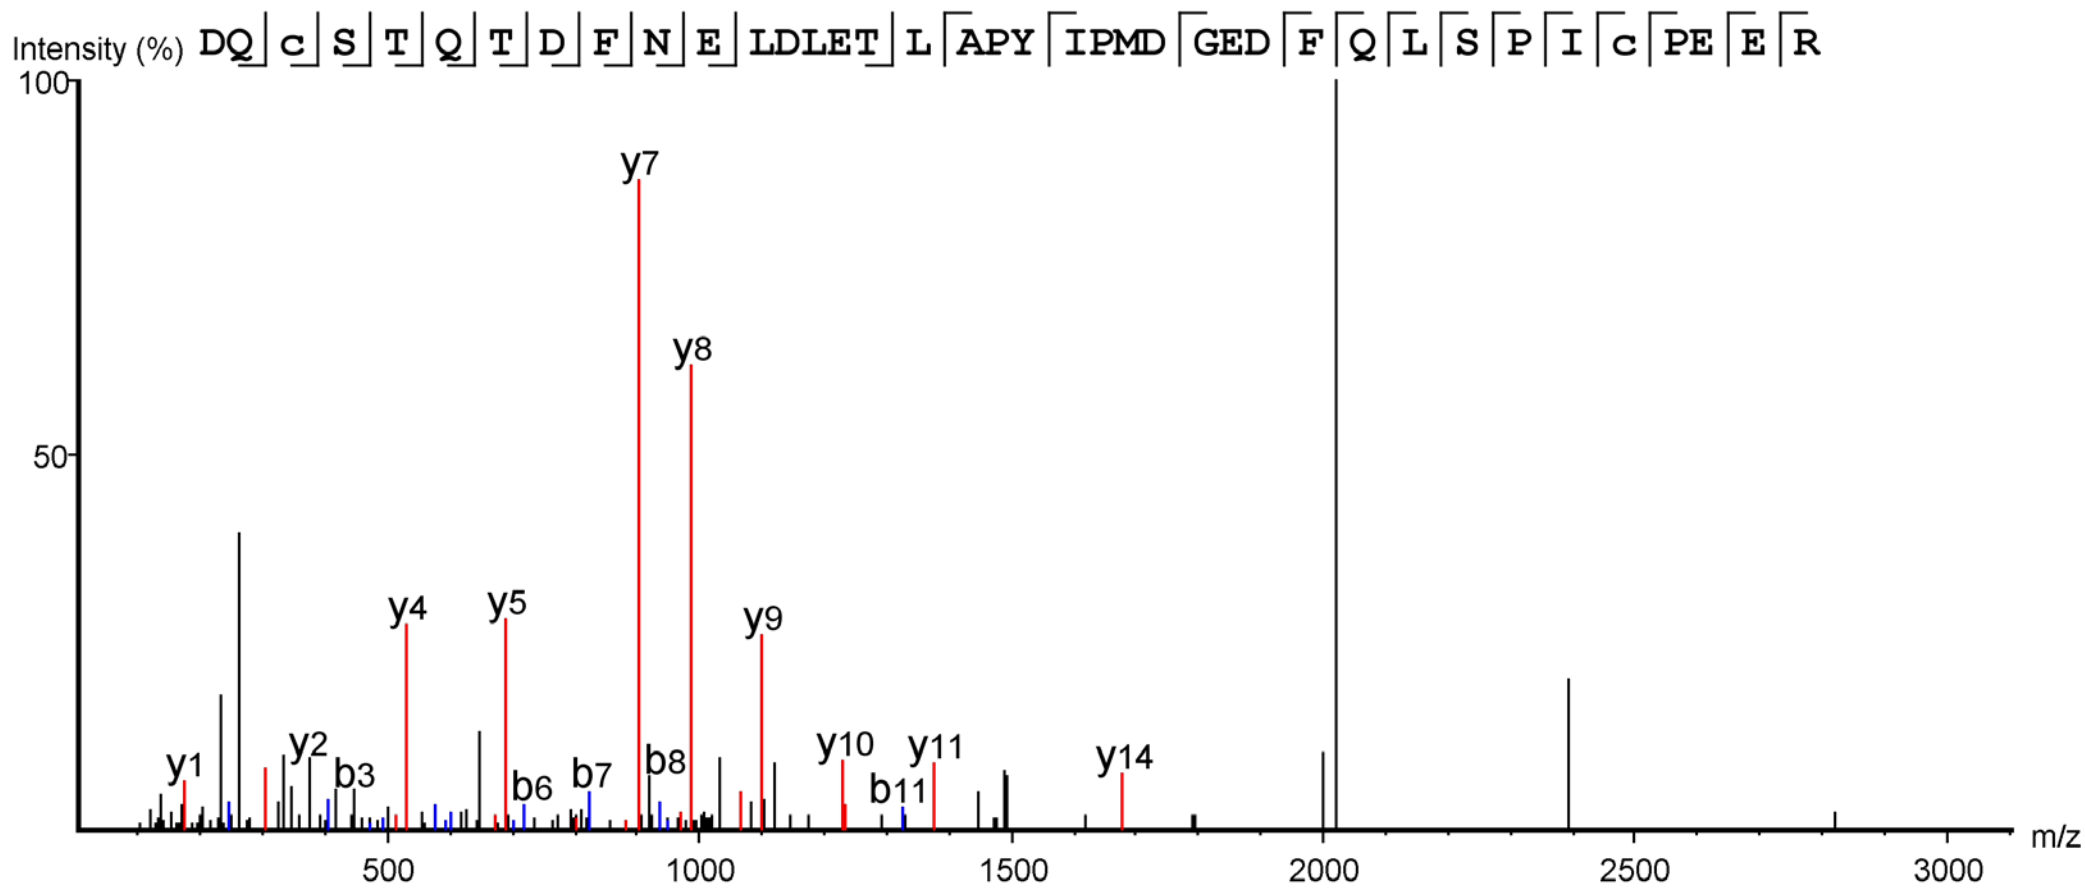

YMT122

Scan #2700

A-335: HIF-2 $\alpha$ (513-550): DQC(+57.02)STQTDFNELDLET LAP(+15.99)YIPMDGEDFQLSPIC(+57.02)PEER

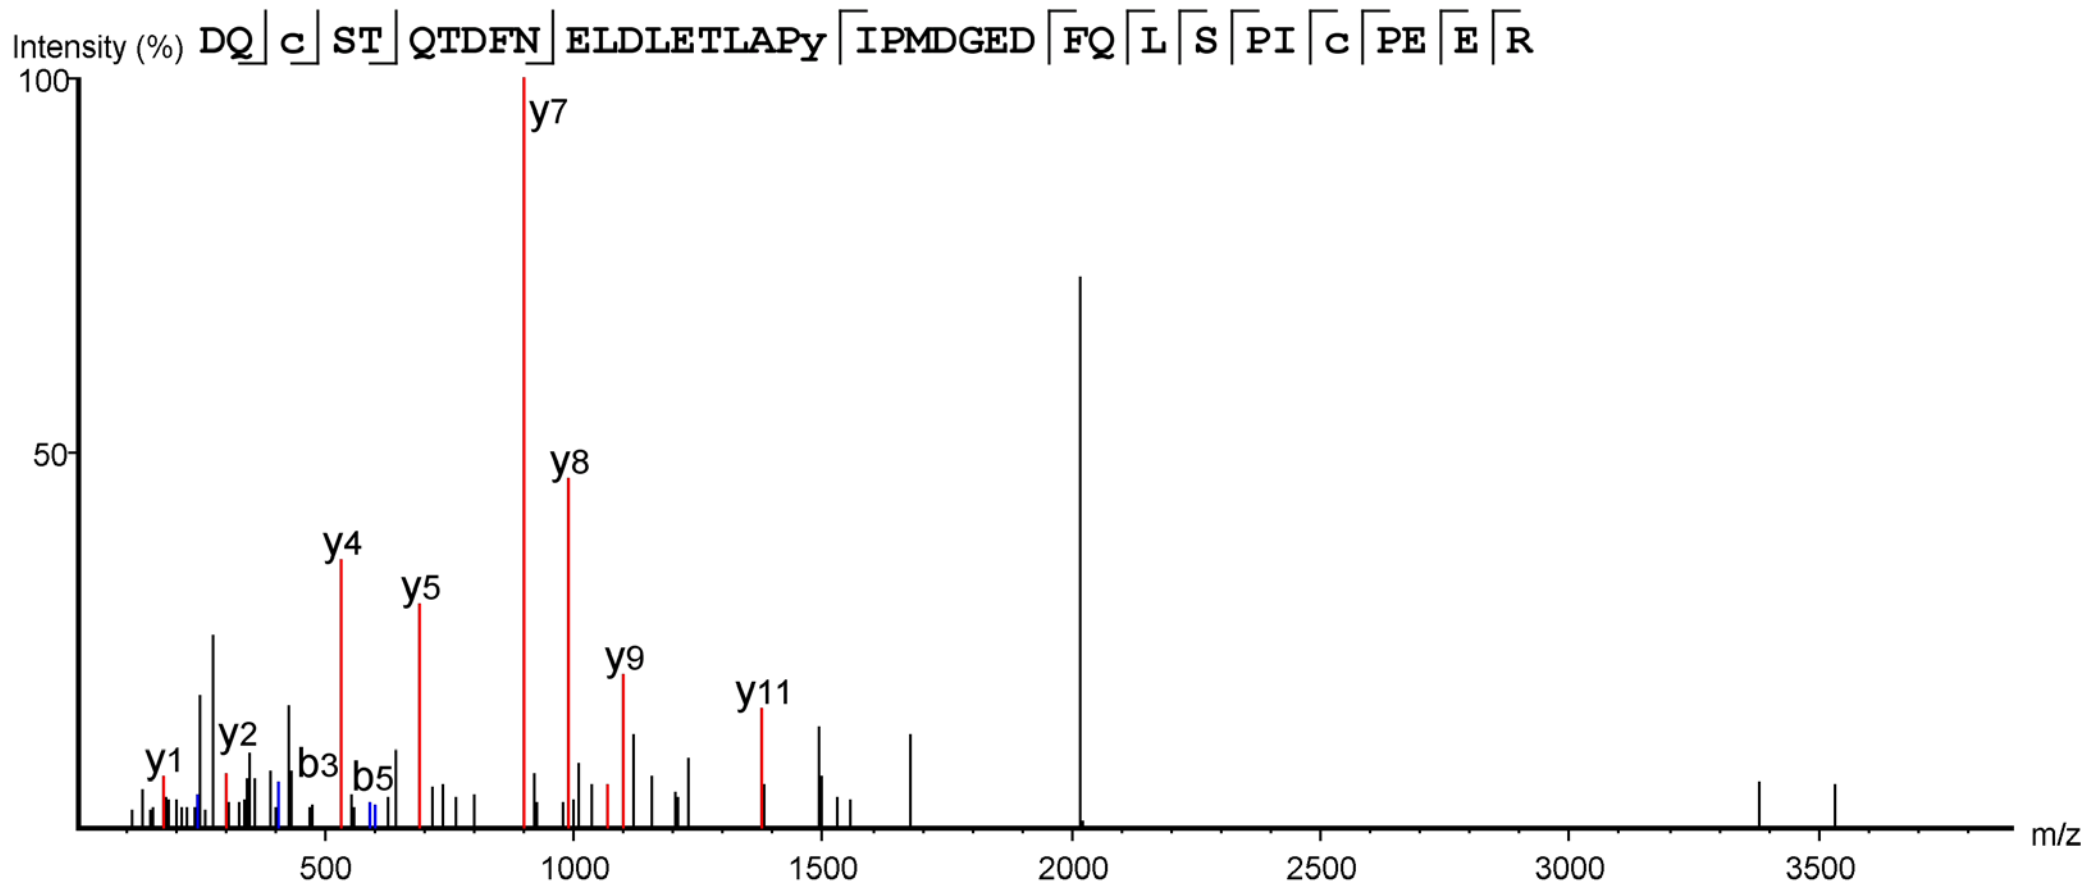

YMT120

Scan #27864

A-336: HIF-2 $\alpha$ <sub>(513-550)</sub>: DQC(+57.02)STQTDFNELDLET LAP(+15.99)YIPMDGEDFQLSPIC(+57.02)PEER

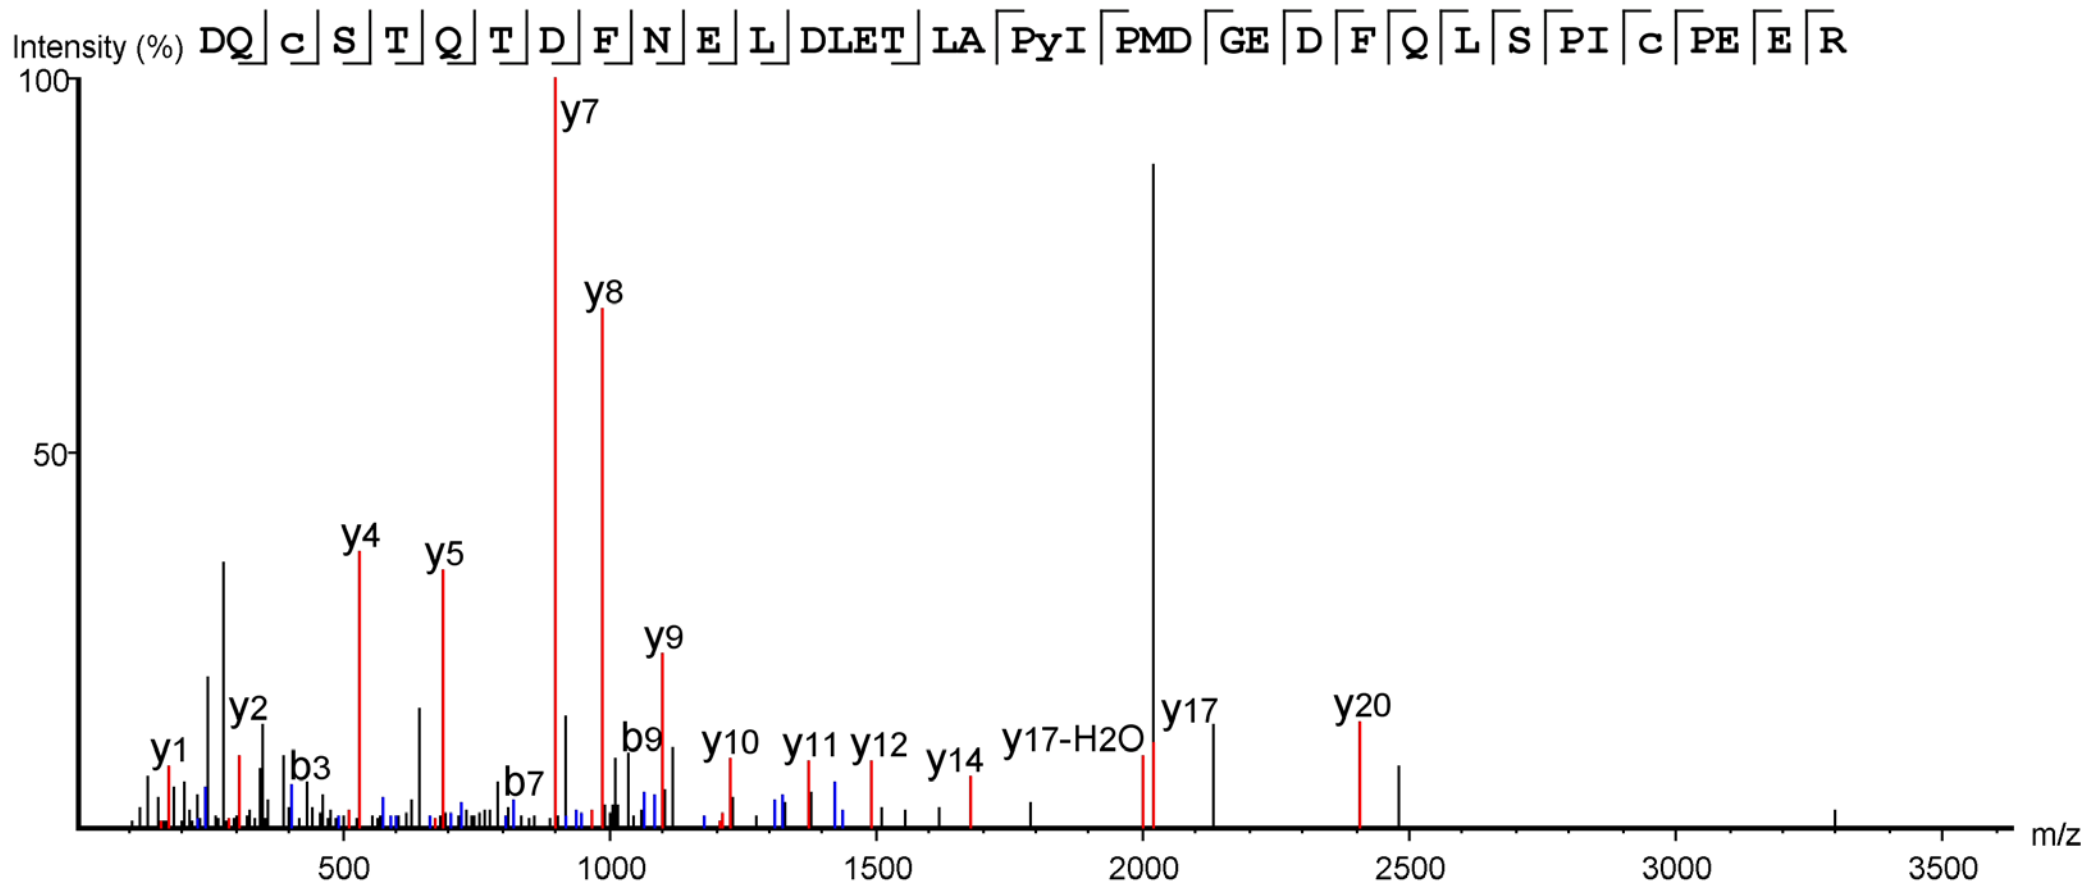

YMT122

Scan #26981

NB: MS2 tolerance increased to 0.04 Da



A-337: HIF-2 $\alpha$ <sub>(513-550)</sub>: DQC(+57.02)STQTDNFNELDLETLAPYIPM(+15.99)DGEDFQLSPIC(+57.02)PEER

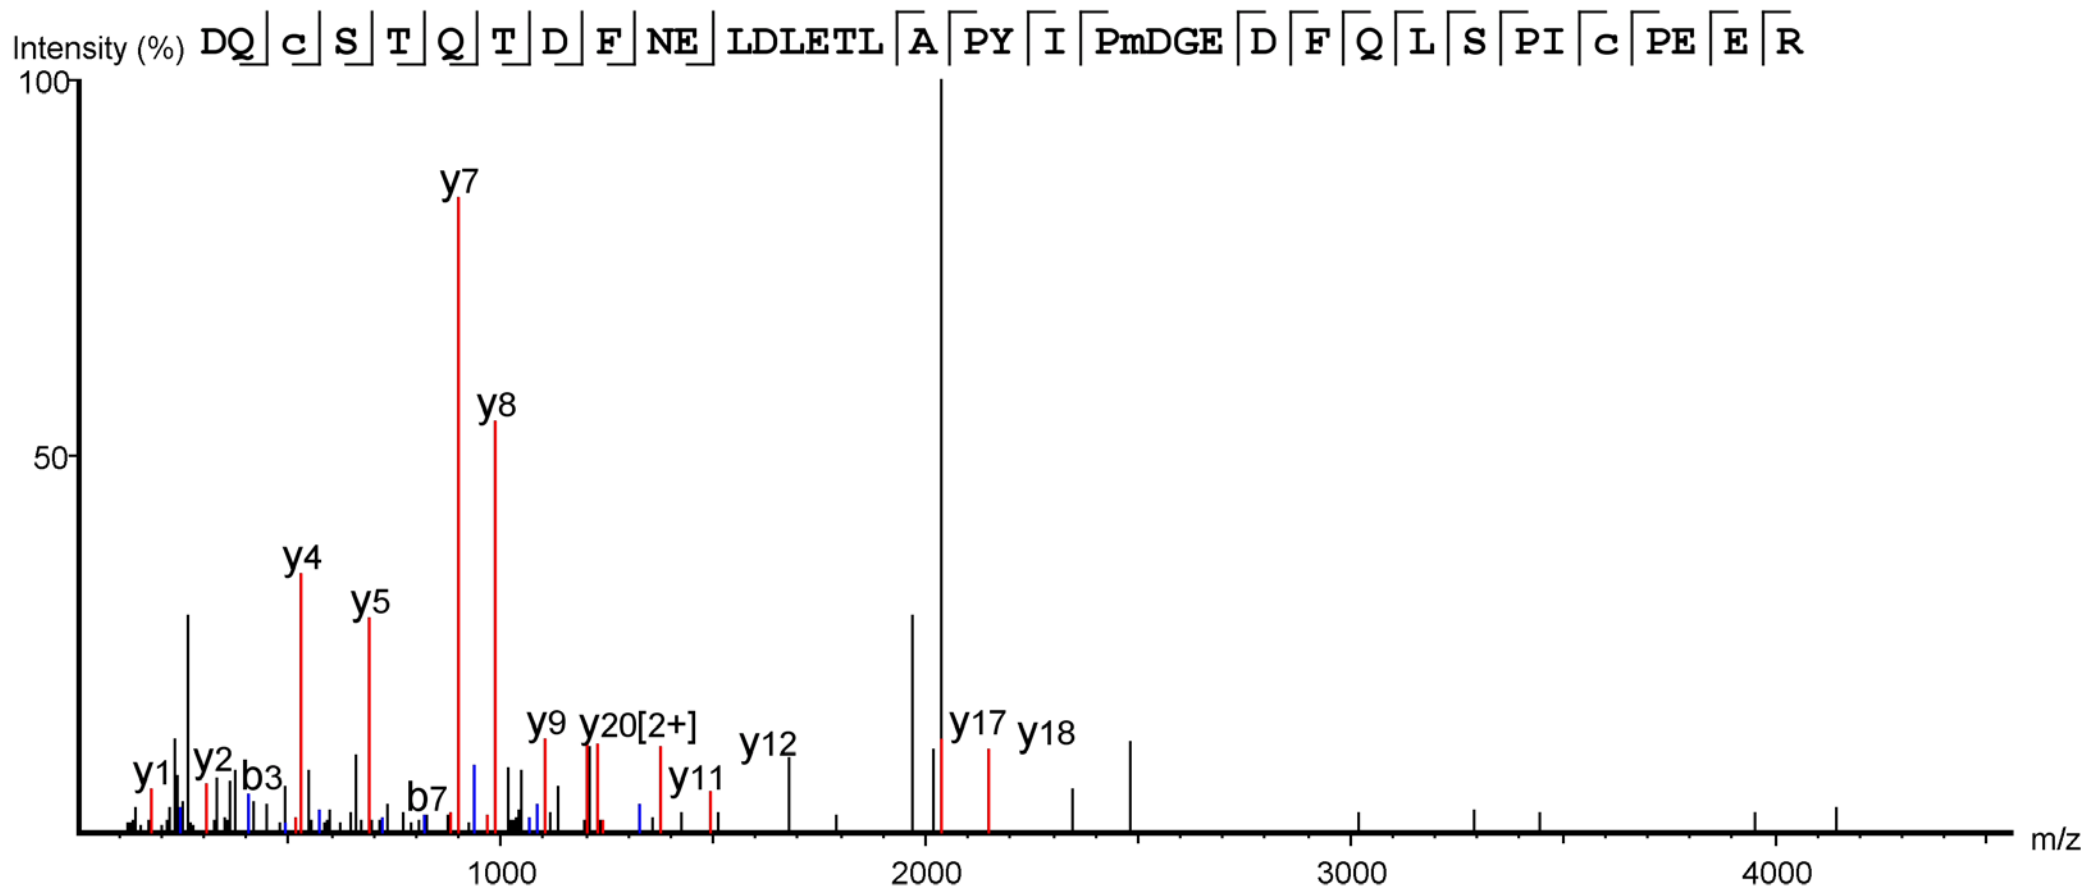

YMT119

Scan #28099

A-338: HIF-2 $\alpha$ <sub>(513-550)</sub>: DQC(+57.02)STQTDNFNLDLETLAPYIPM(+15.99)DGEDFQLSPIC(+57.02)PEER

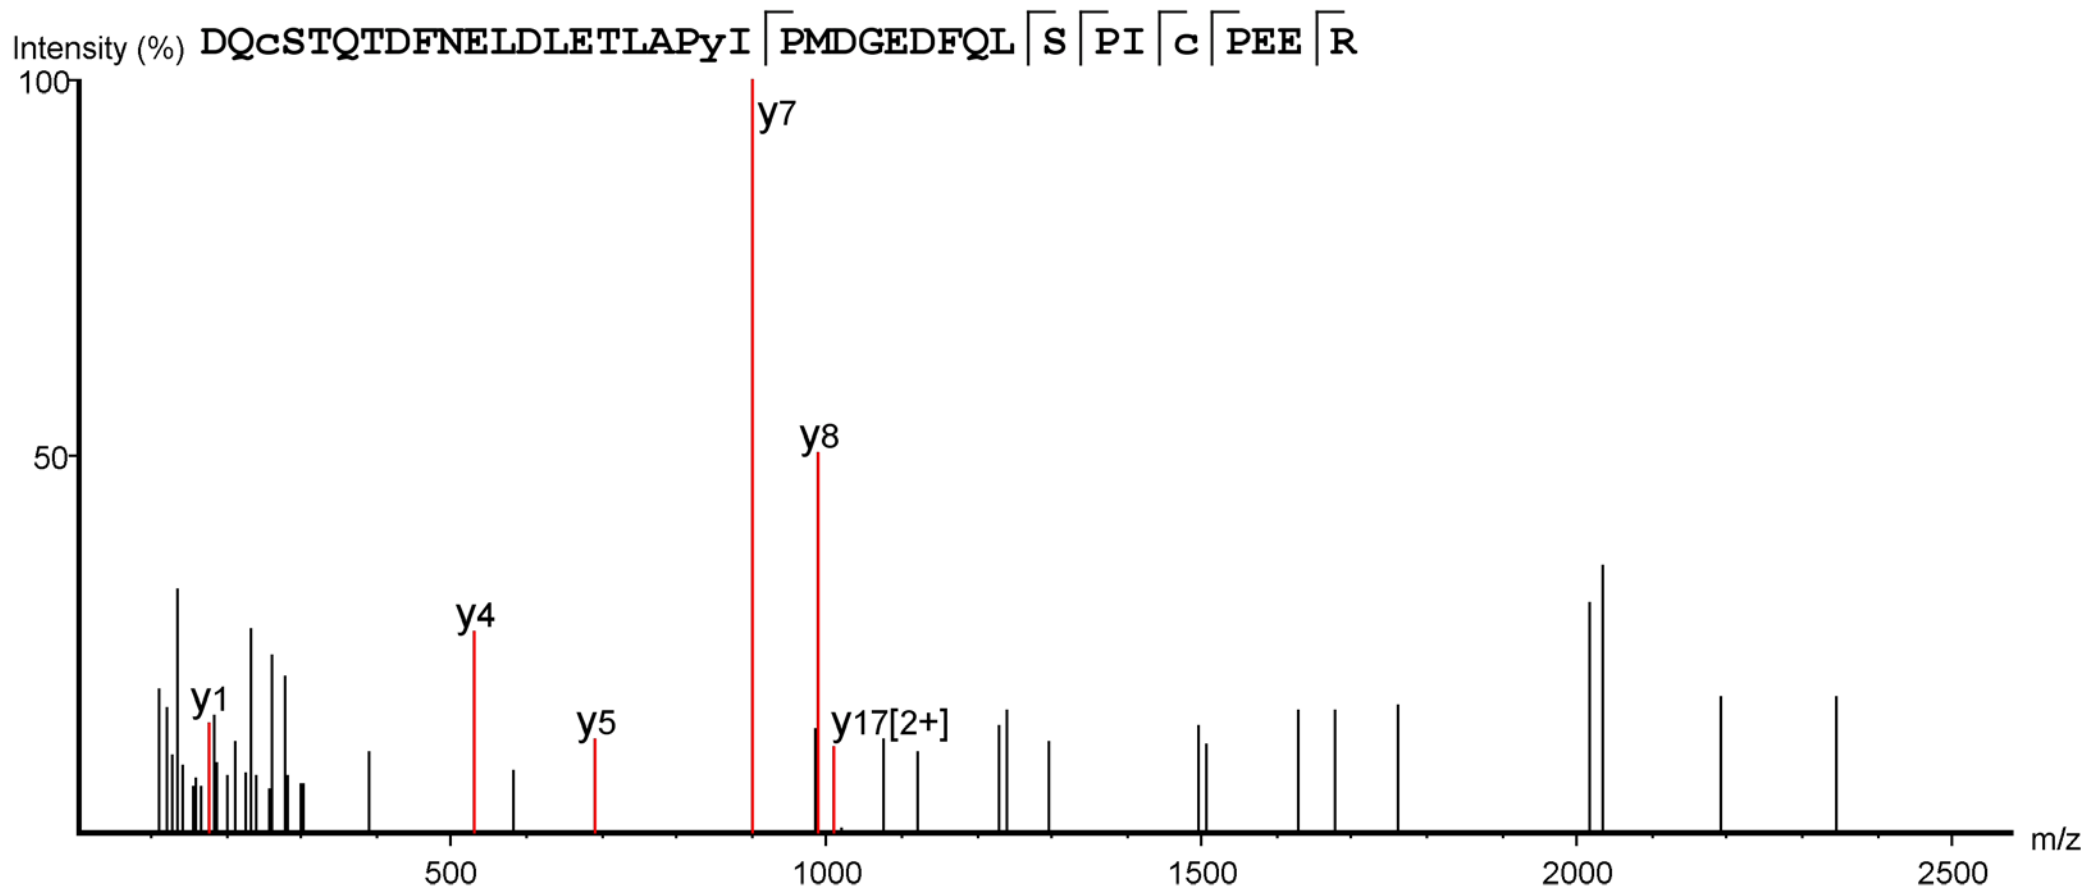

YMT121

Scan #27861

A-339: HIF-2 $\alpha$ <sub>(513-550)</sub>: DQC(+57.02)STQTDFNELDLETLAPYIPM(+15.99)DGEDFQLSPIC(+57.02)PEER

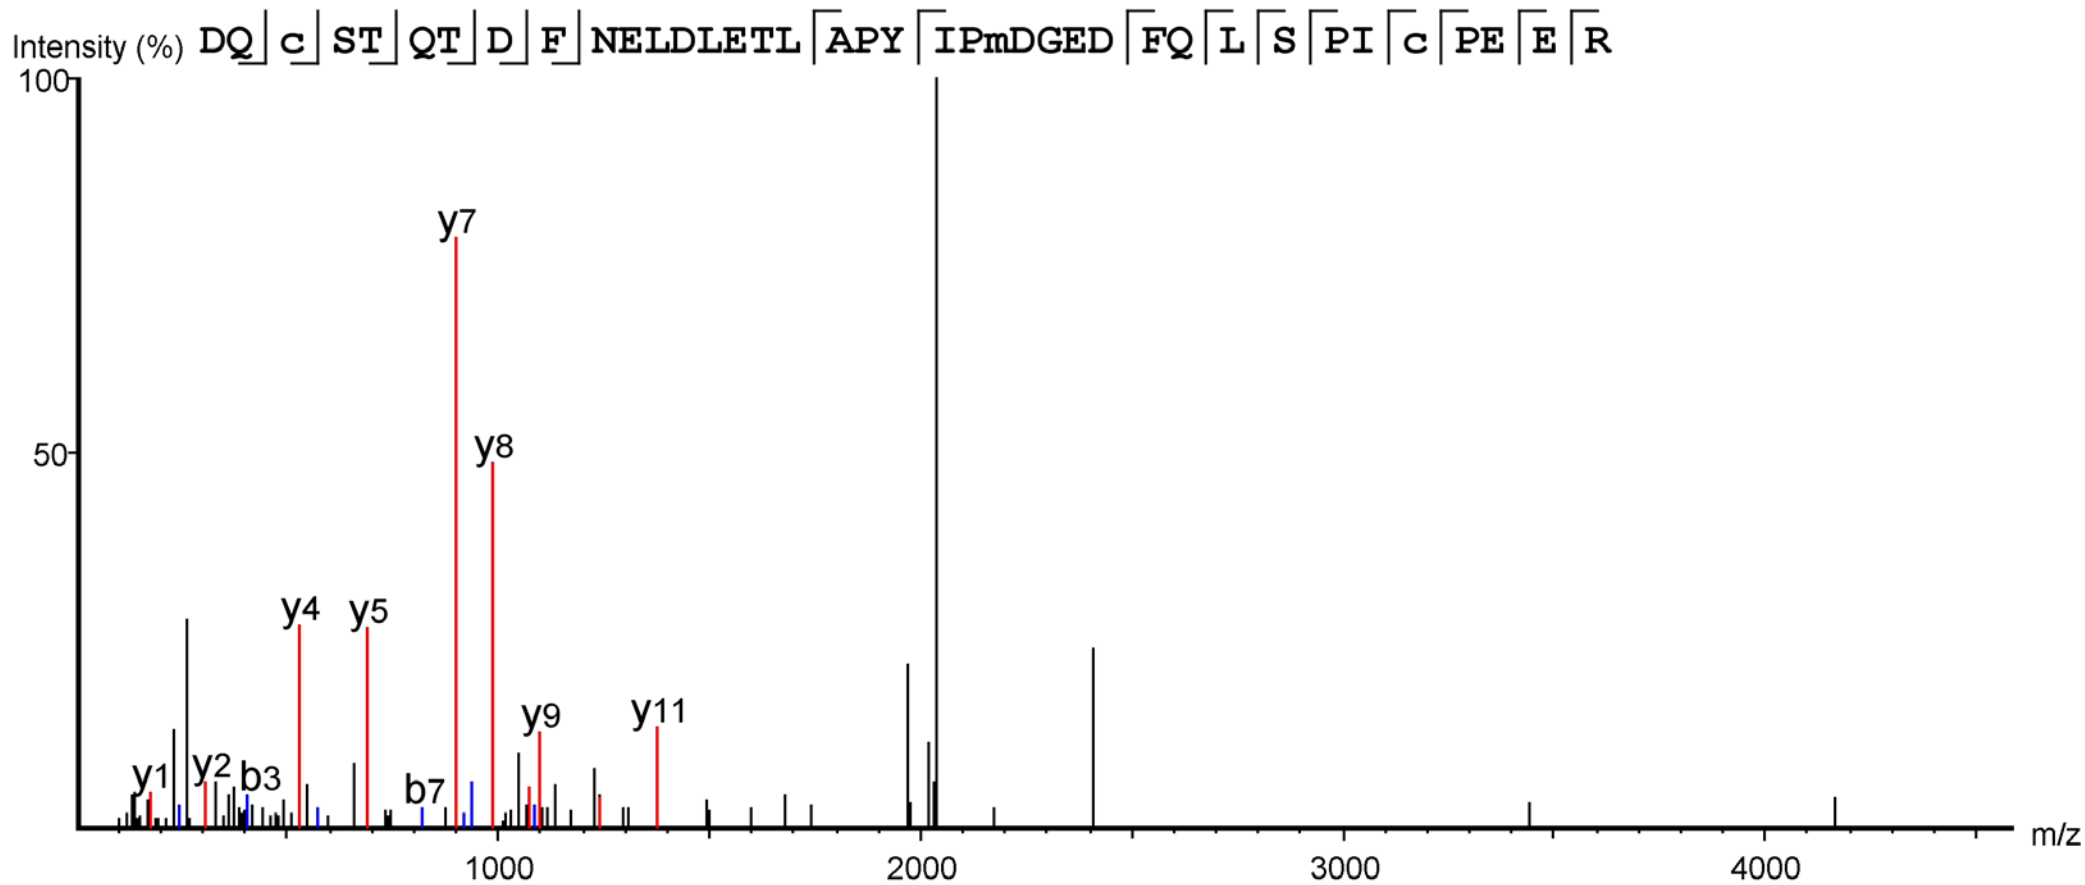

YMT122

Scan #26888

A-340: HIF-2 $\alpha$ (513-550): DQC(+57.02)STQTFNELDLETLP(+15.99)YIPM(+15.99)DGEDFQLSPIC(+57.02)PEER

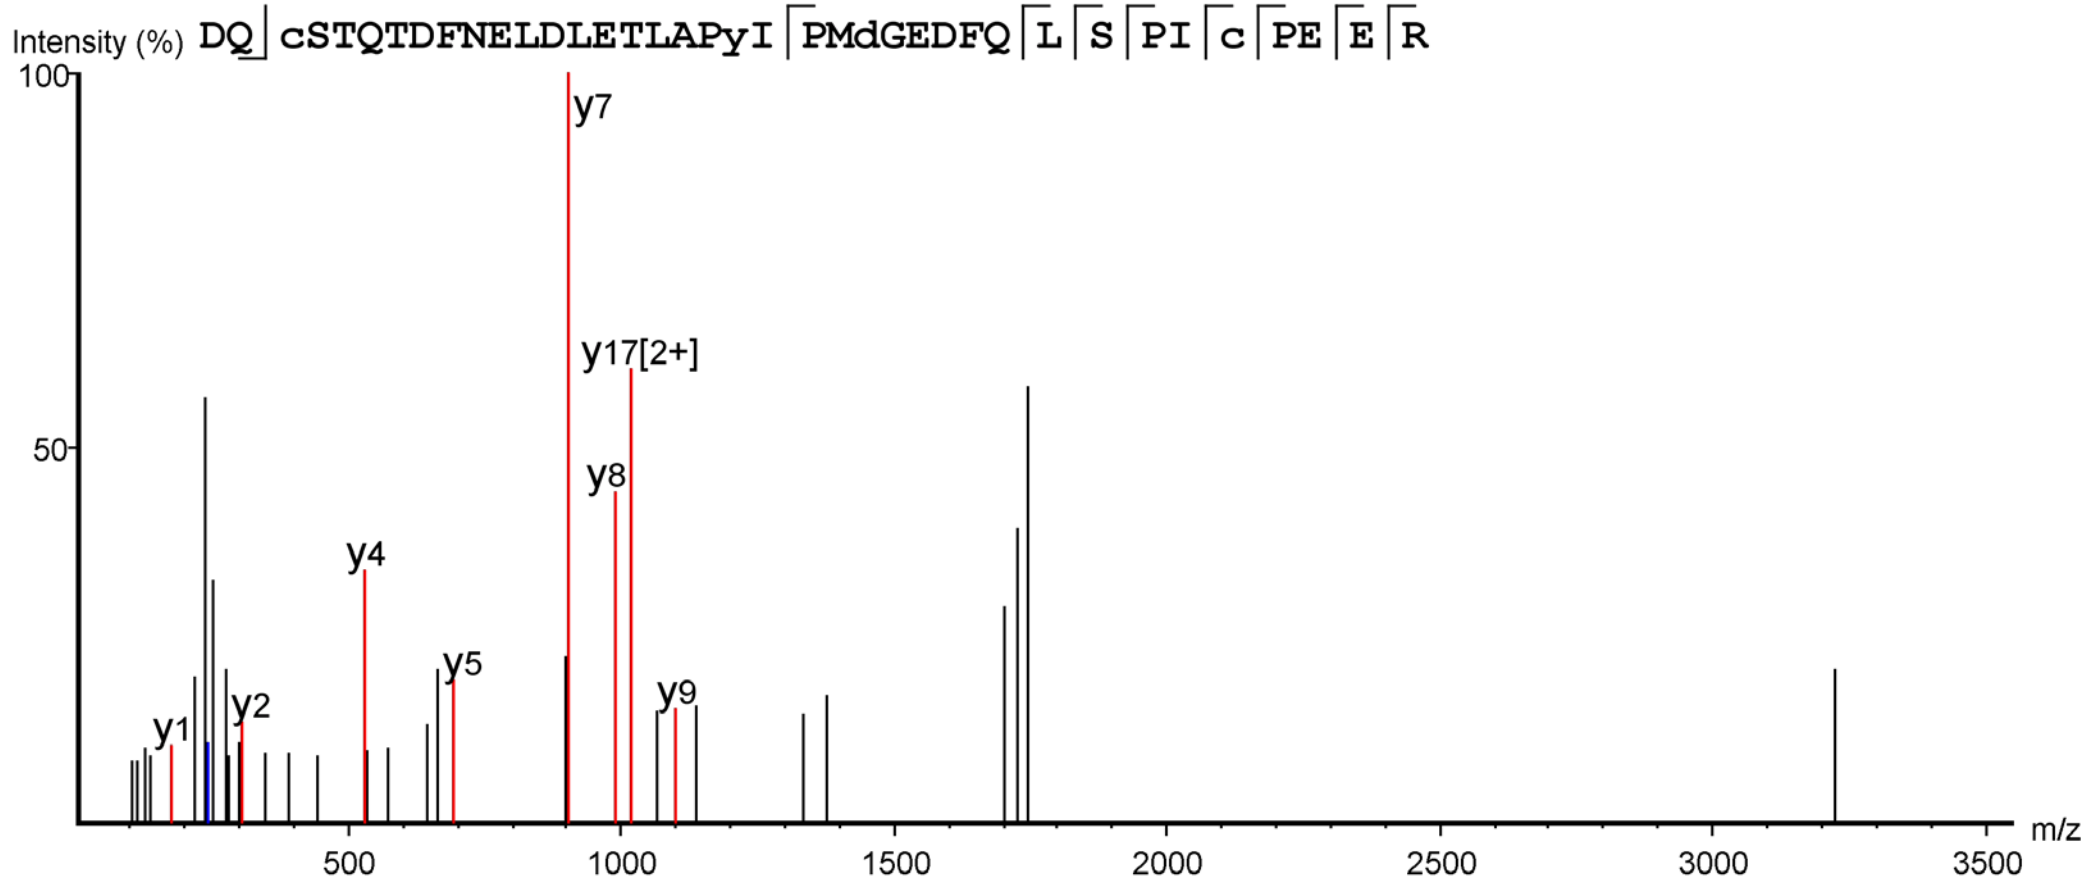

YMT119  
Scan #28036

A-341: HIF-2 $\alpha$ (513-550): DQC(+57.02)STQTDNFNLDLETLAP(+15.99)YIPM(+15.99)DGEDFQLSPIC(+57.02)PEER

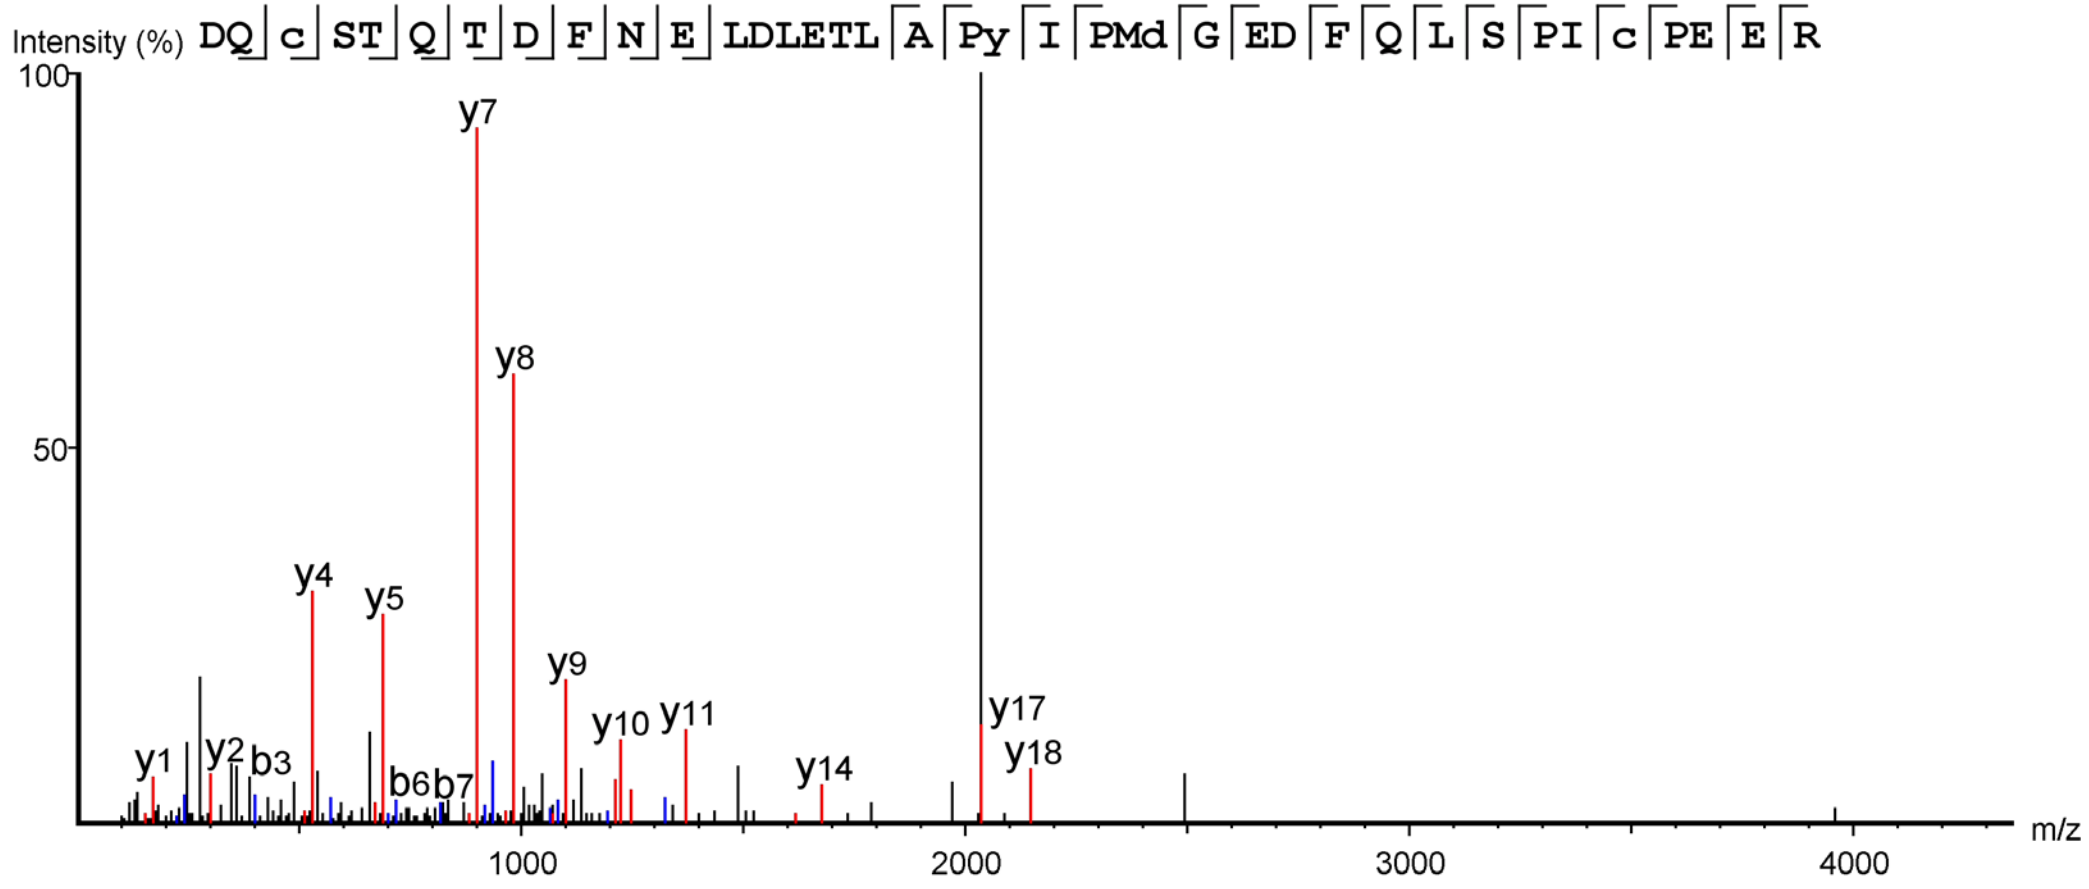

YMT120  
Scan #27672

A-342: HIF-2 $\alpha$ (513-550): DQC(+57.02)STQTDFNELDLETLAP(+15.99)YIPM(+15.99)DGEDFQLSPIC(+57.02)PEER

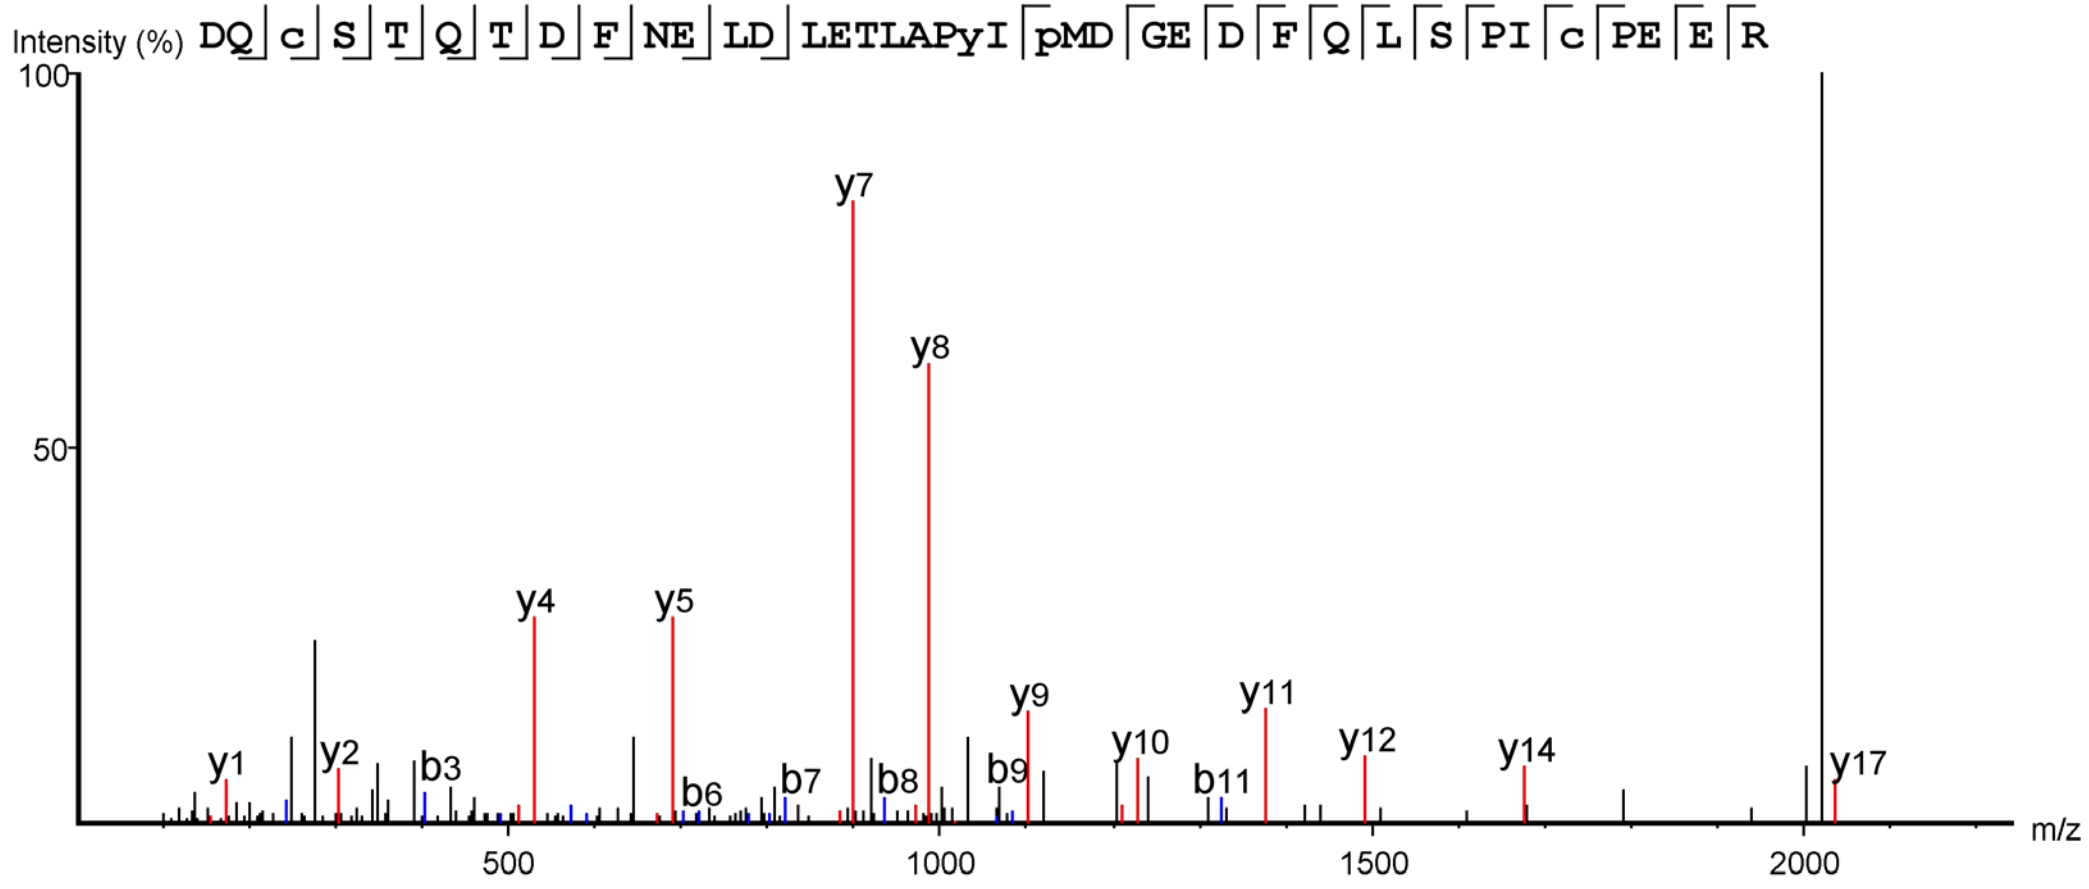

YMT121  
Scan #27957

A-343: HIF-2 $\alpha$ (513-550): DQC(+57.02)STQTDFNELDLETLP(+15.99)YIPM(+15.99)DGEDFQLSPIC(+57.02)PEER

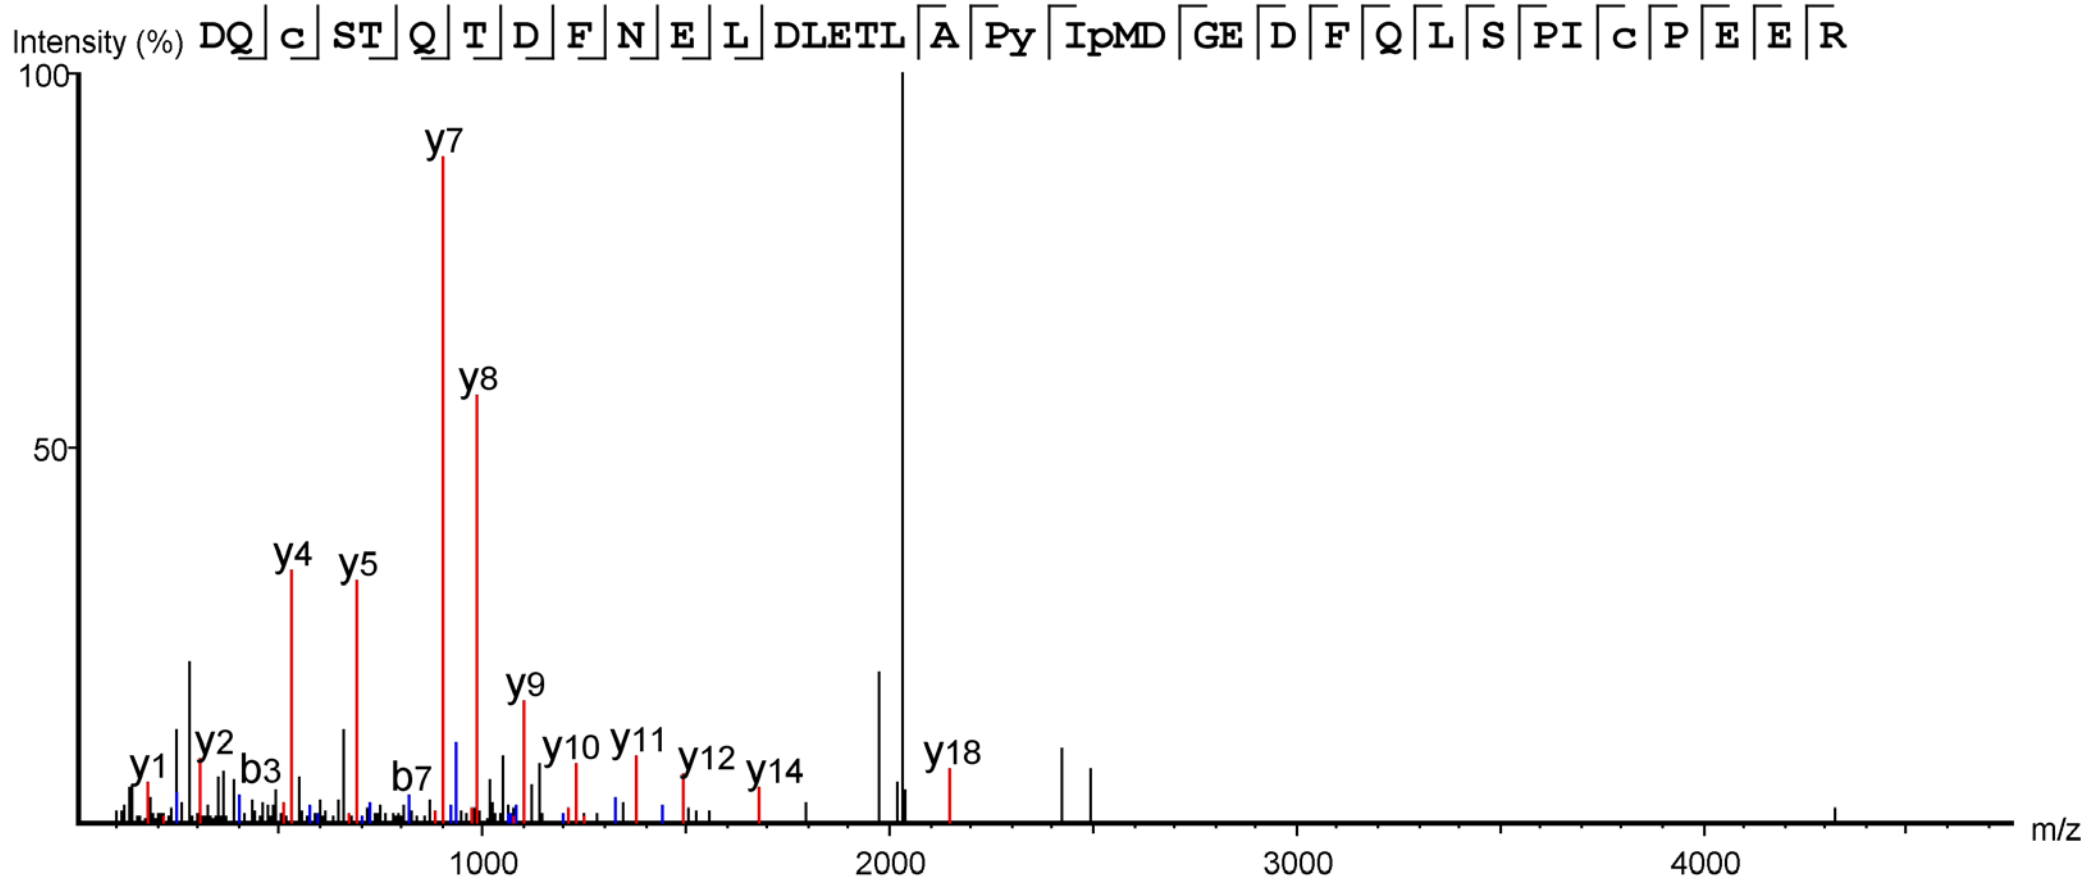

YMT122  
Scan #26823

A-344: HIF-2 $\alpha$ <sub>(393-429)</sub>: LKEEPPEELAQLA**P**TPGD~~A~~IISLDFGNQNFEESSAYGK

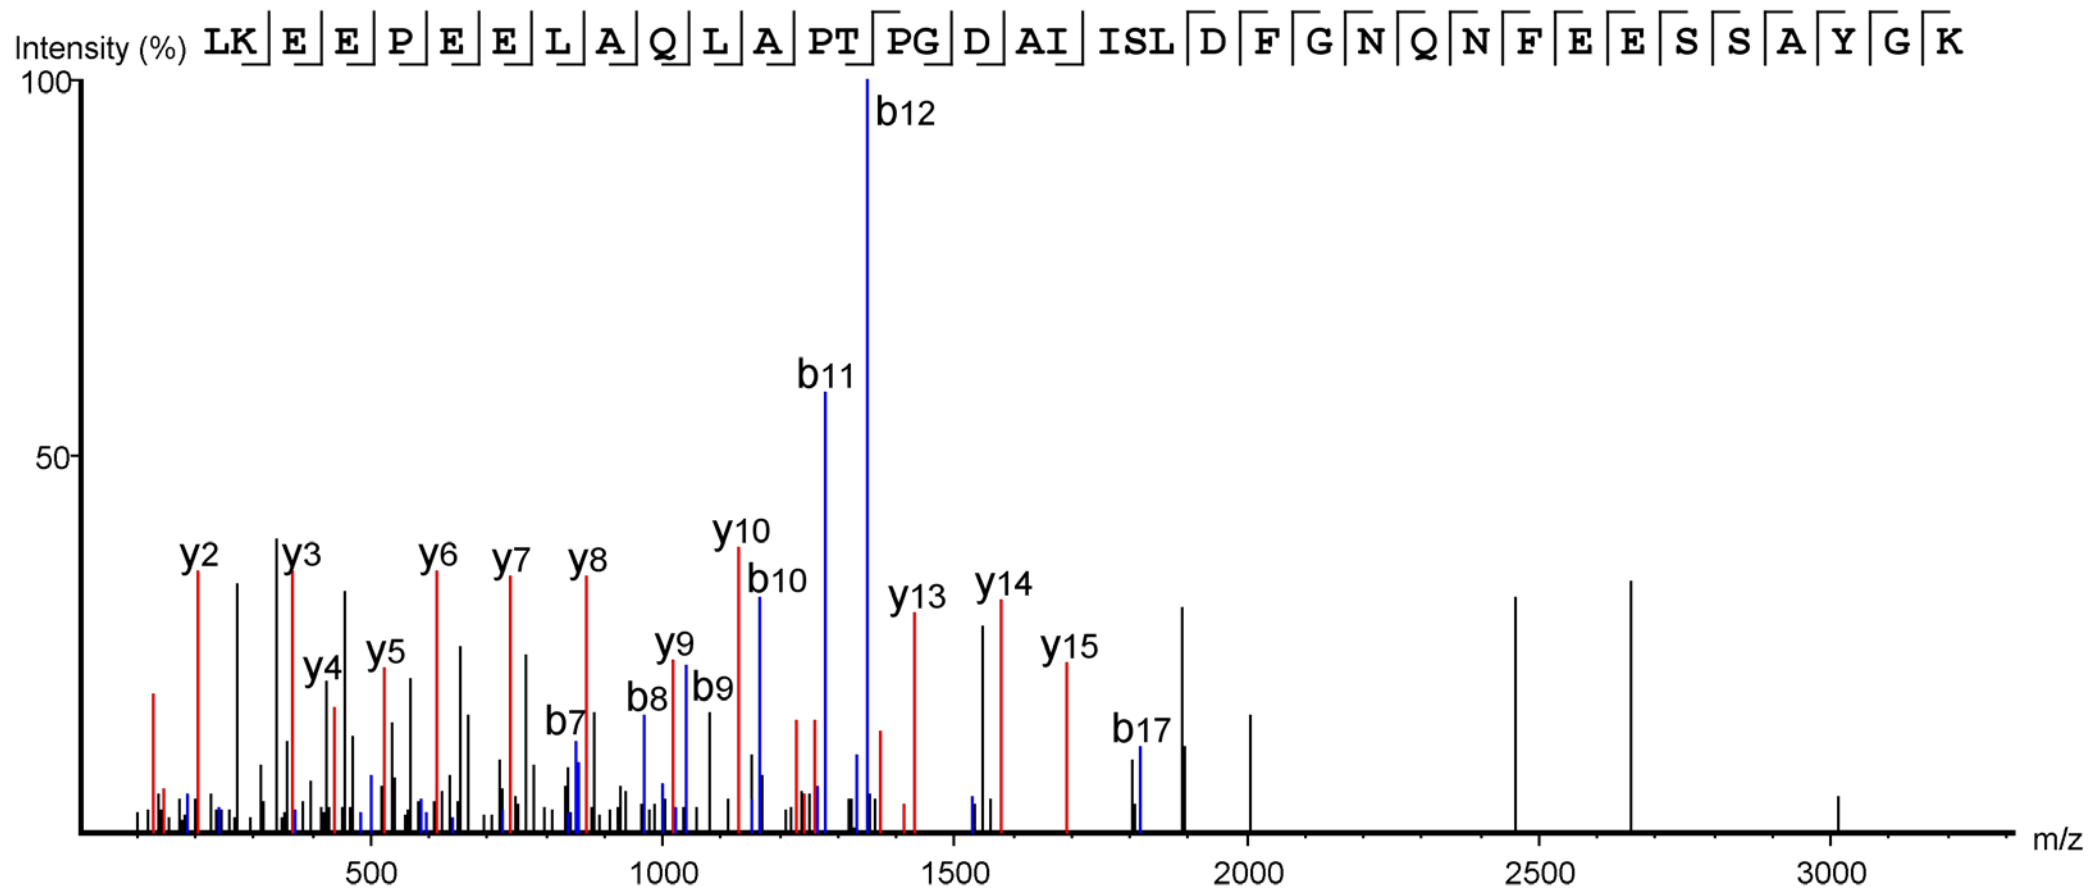

YMT119

Scan #23298



A-345: HIF-2 $\alpha$ (393-429): LK~~E~~PEEL~~A~~Q~~L~~A~~P~~TPGD~~A~~IISLDFGNQNF~~E~~ESSAYGK

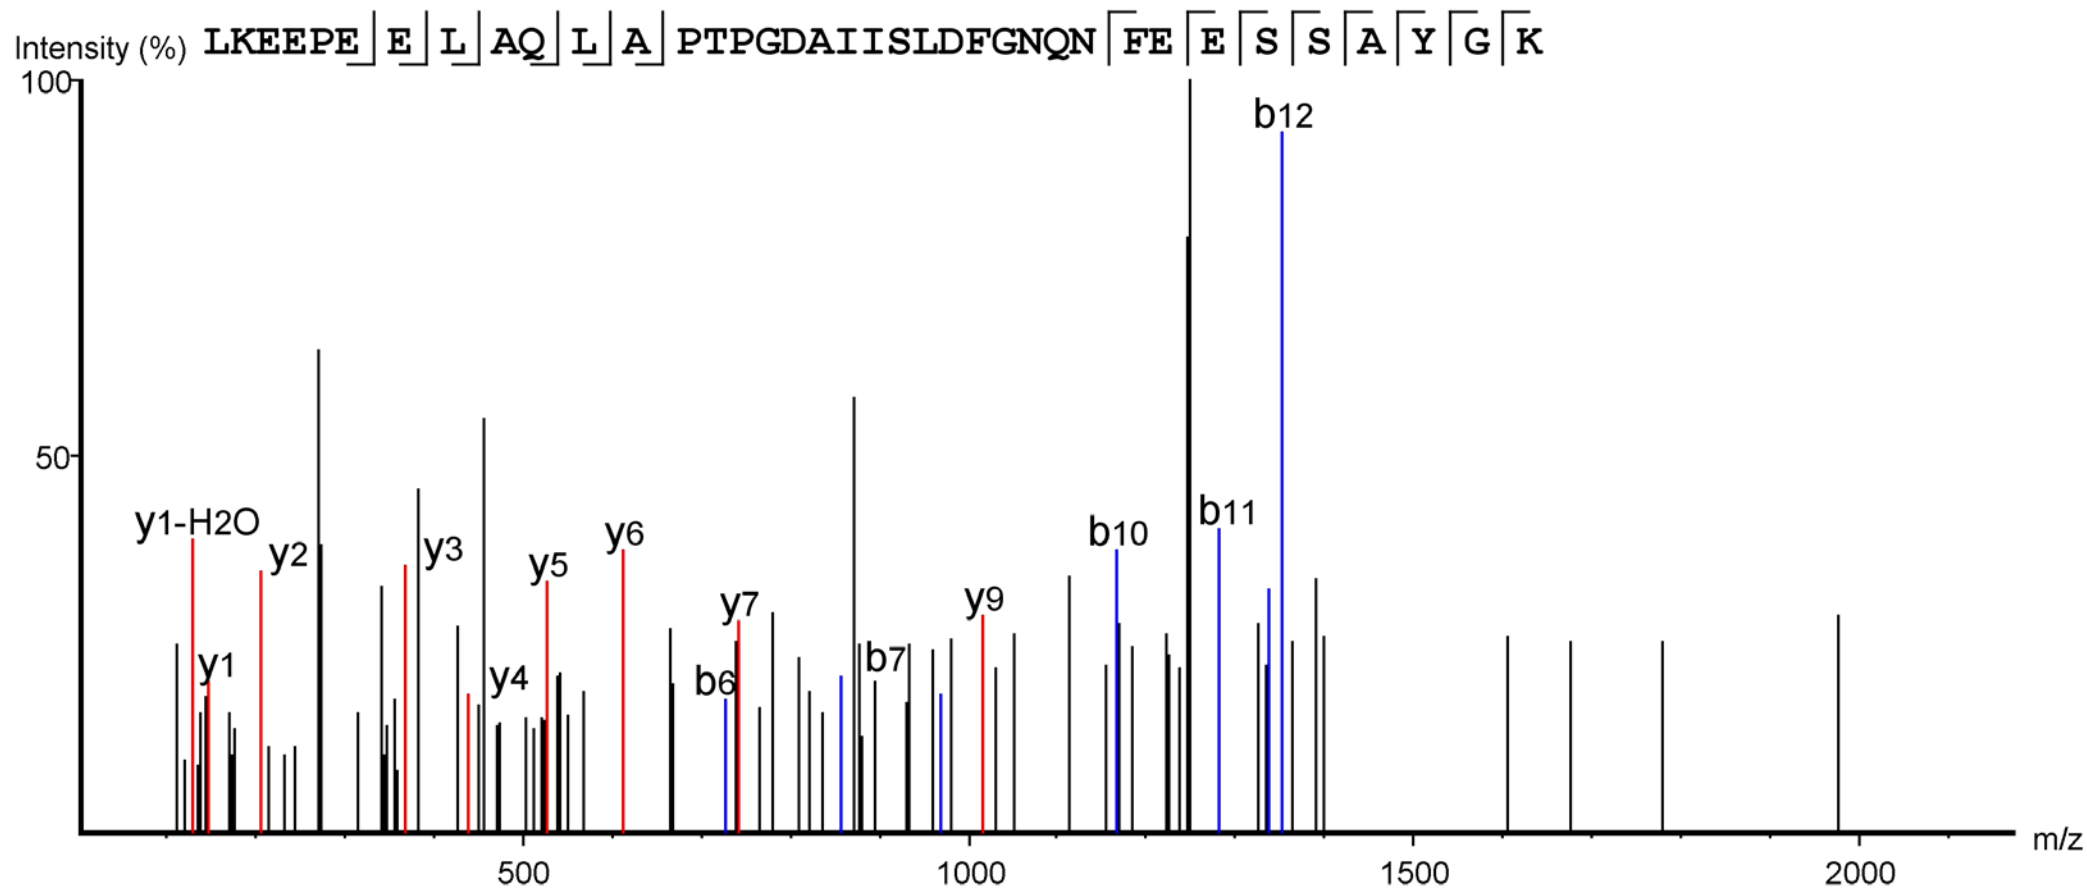

YMT120

Scan #22909

A-346: HIF-2 $\alpha$ <sub>(393-429)</sub>: LKEEPPEELAQLA**P**TPGDAIISLDFGNQNFEESSAYGK

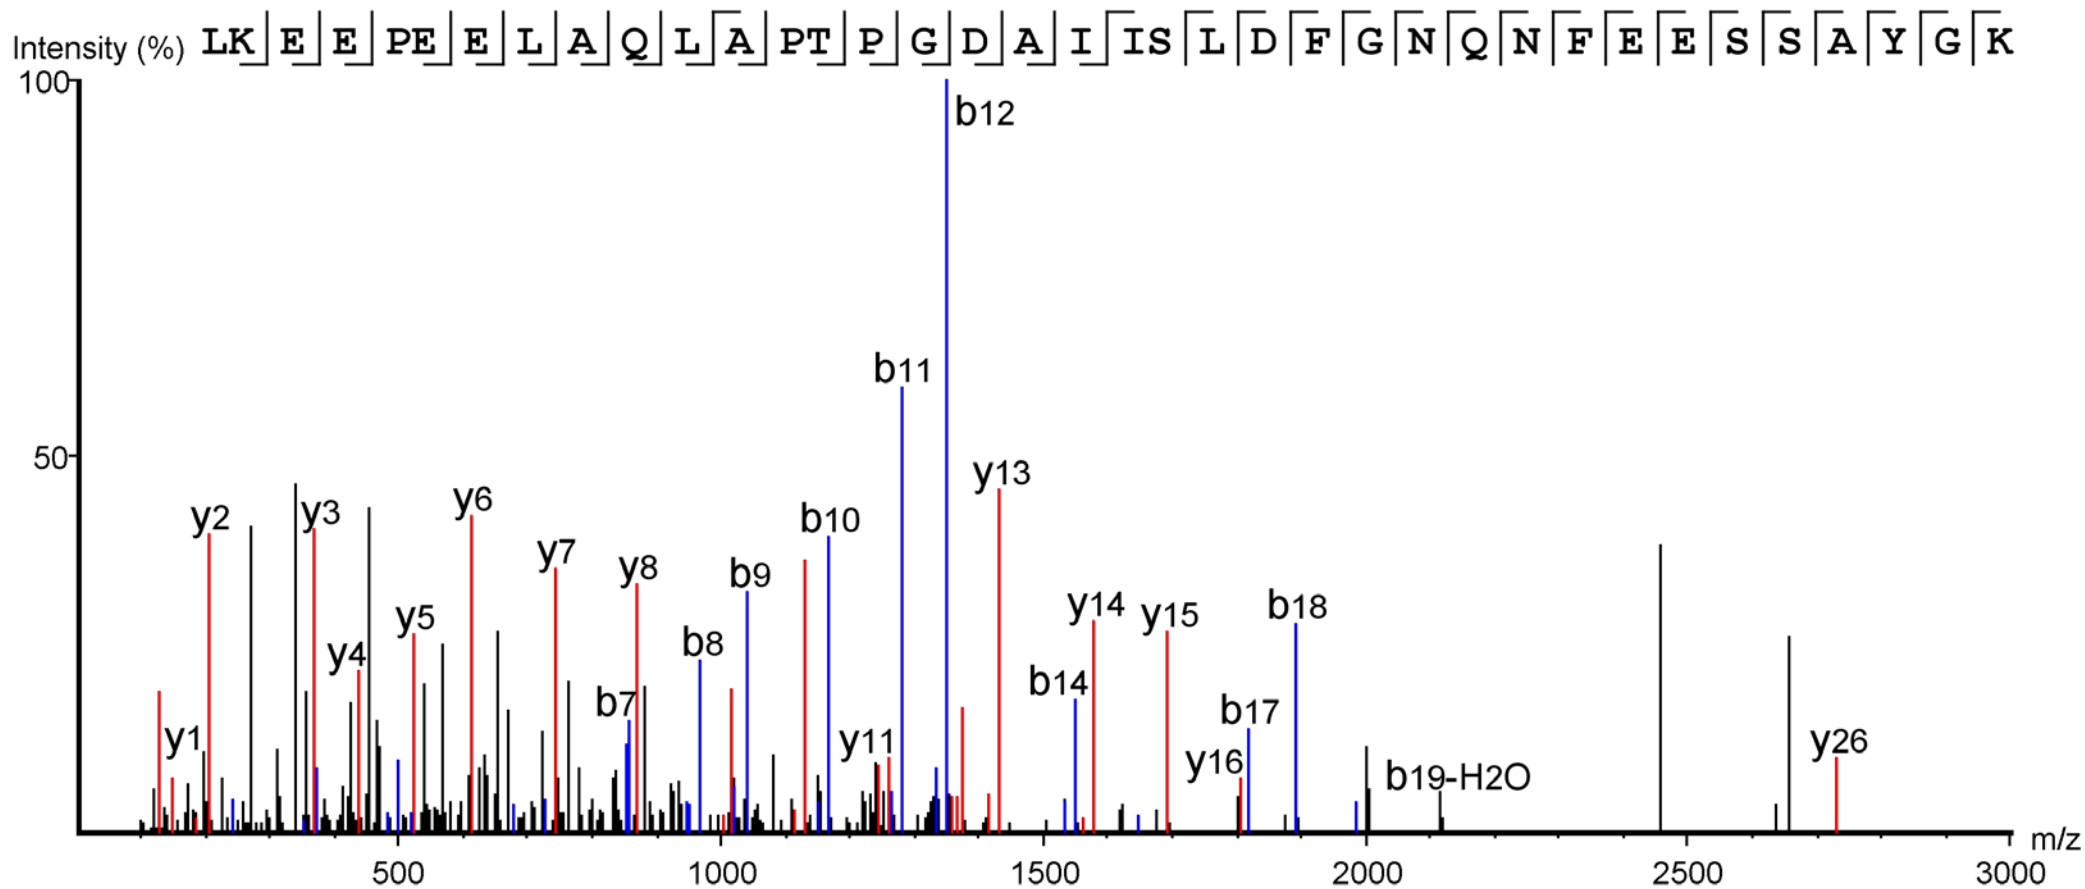

YMT121

Scan #22661

A-347: HIF-2 $\alpha$ <sub>(393-429)</sub>: LKEEPPEELAQLA**P**TPGD~~A~~IISLD**F**GNQNFEESSAYGK

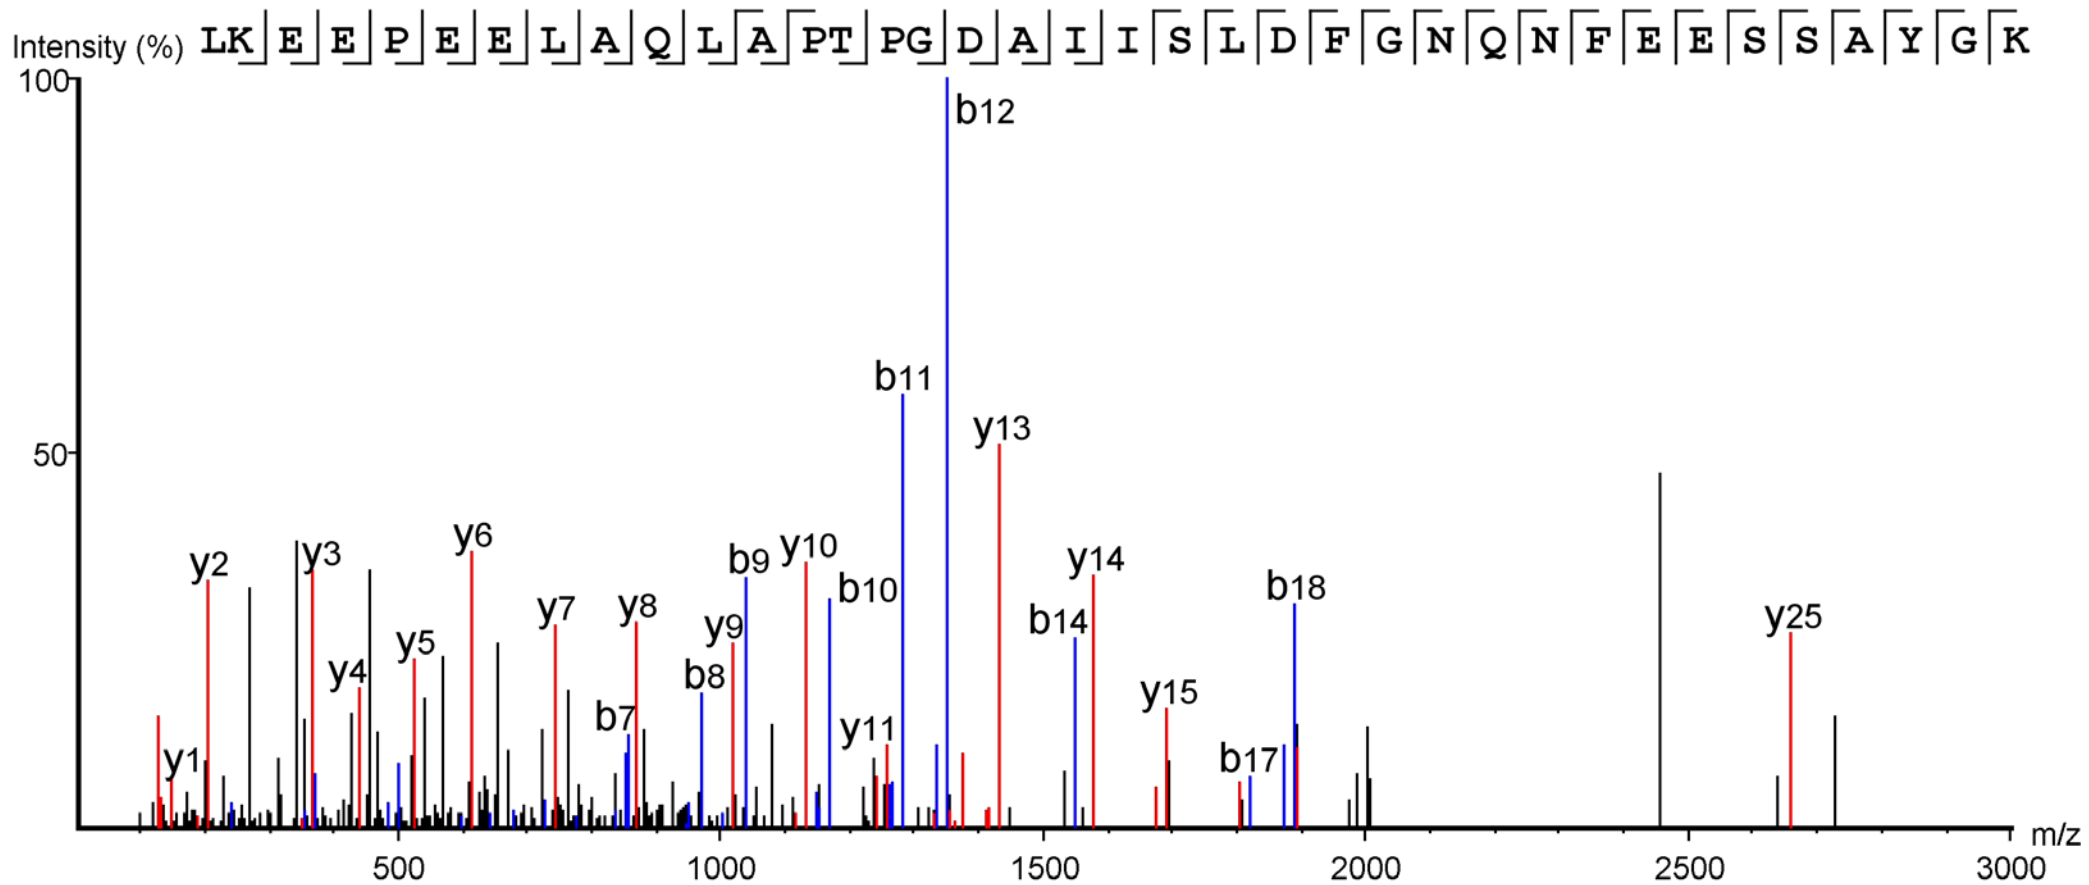

YMT122

Scan #22004

A-348: HIF-2 $\alpha$ (<sub>393-429</sub>): LKEEP~~E~~LAQLAP(+15.99)TPGD~~A~~IISLDFGNQNFEESSAYGK

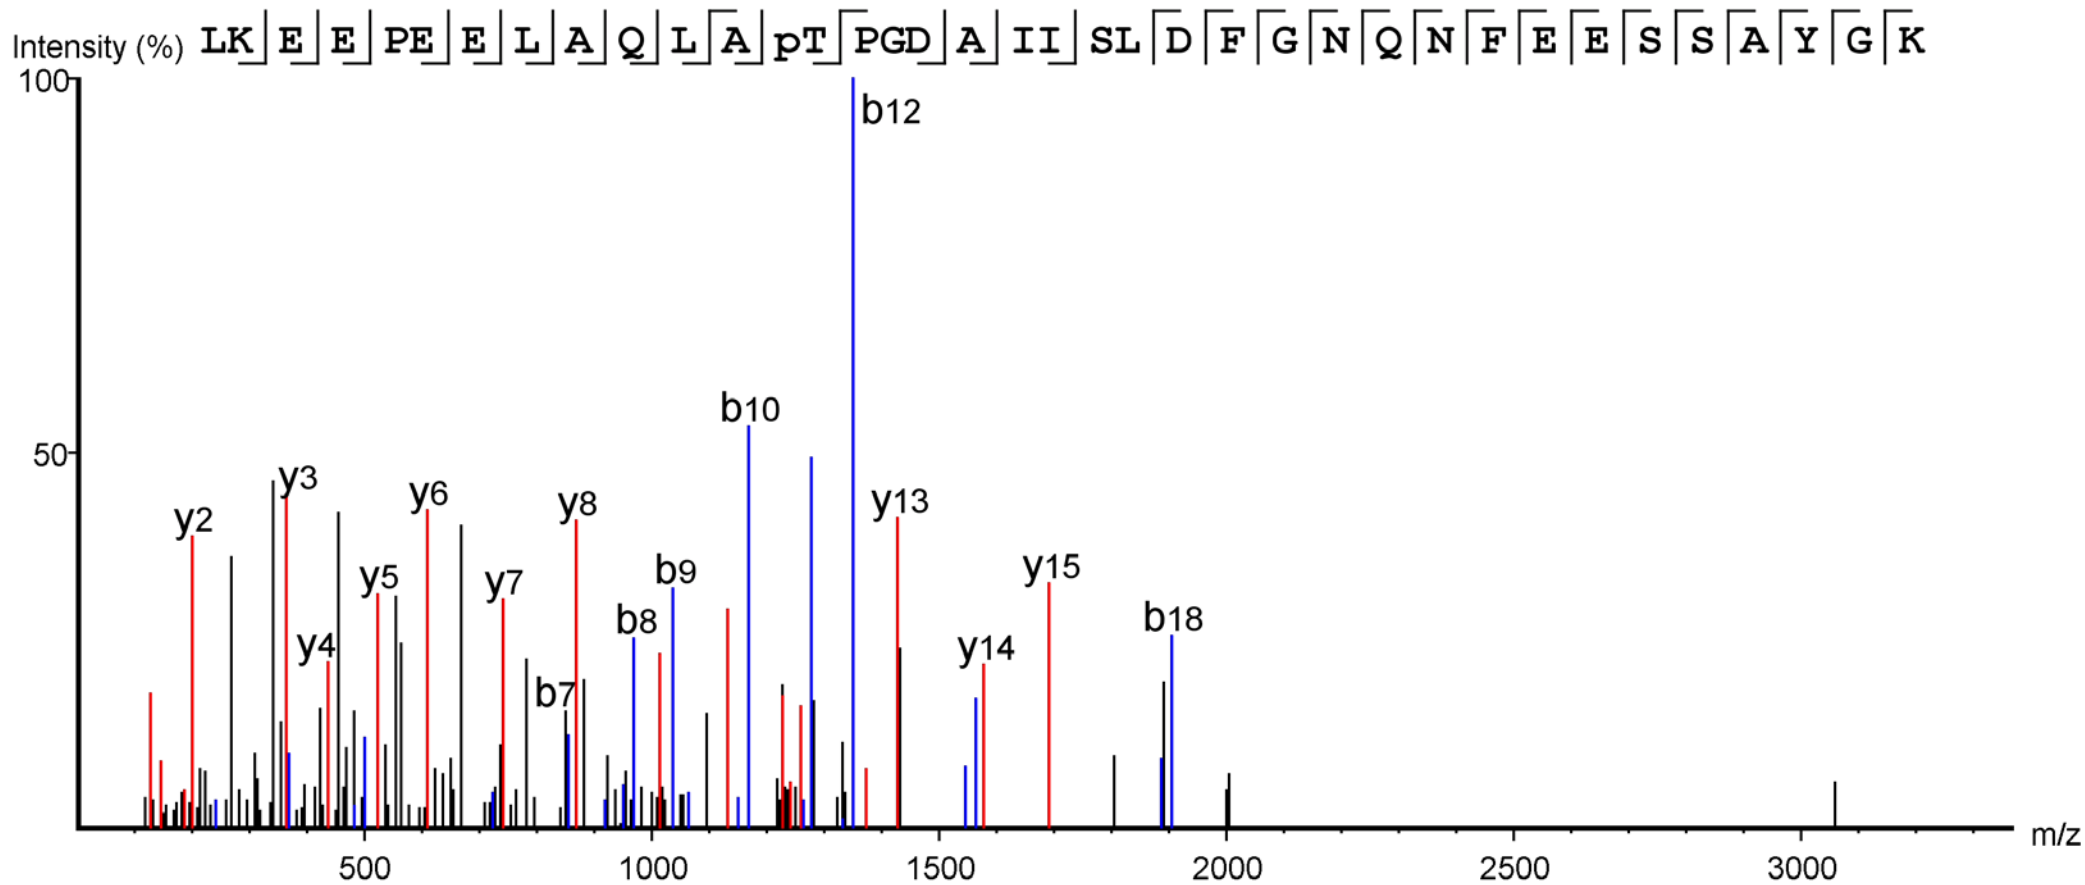

YMT119

Scan #22482

A-349: HIF-2 $\alpha$ (393-429): LKEEP<sup>(+15.99)</sup>EELAQLA pT PGDAIISLDFGNQNFEESSAYGK

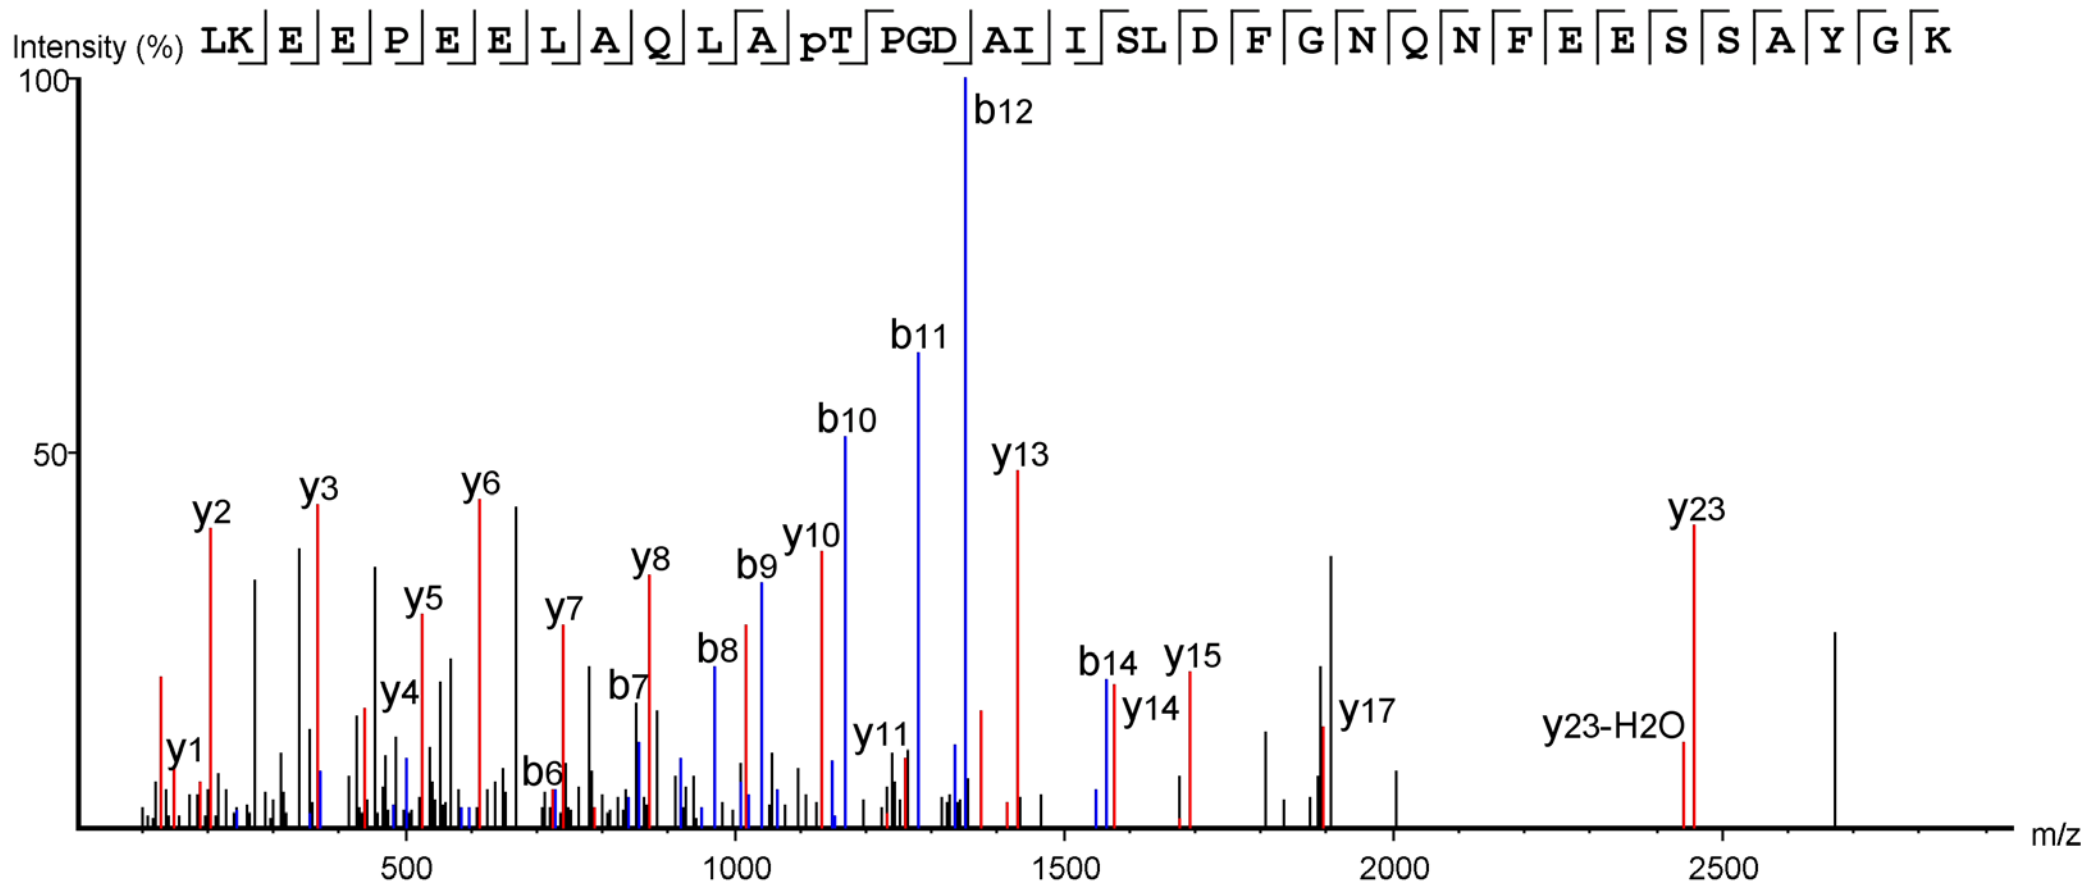

YMT120

Scan #21997

A-350: HIF-2 $\alpha$ <sub>(393-429)</sub>: LKEEP~~E~~LAQLAP(+15.99)TPGD~~A~~IISL~~D~~FGN~~Q~~N~~F~~E~~E~~S~~S~~A~~Y~~G~~K~~

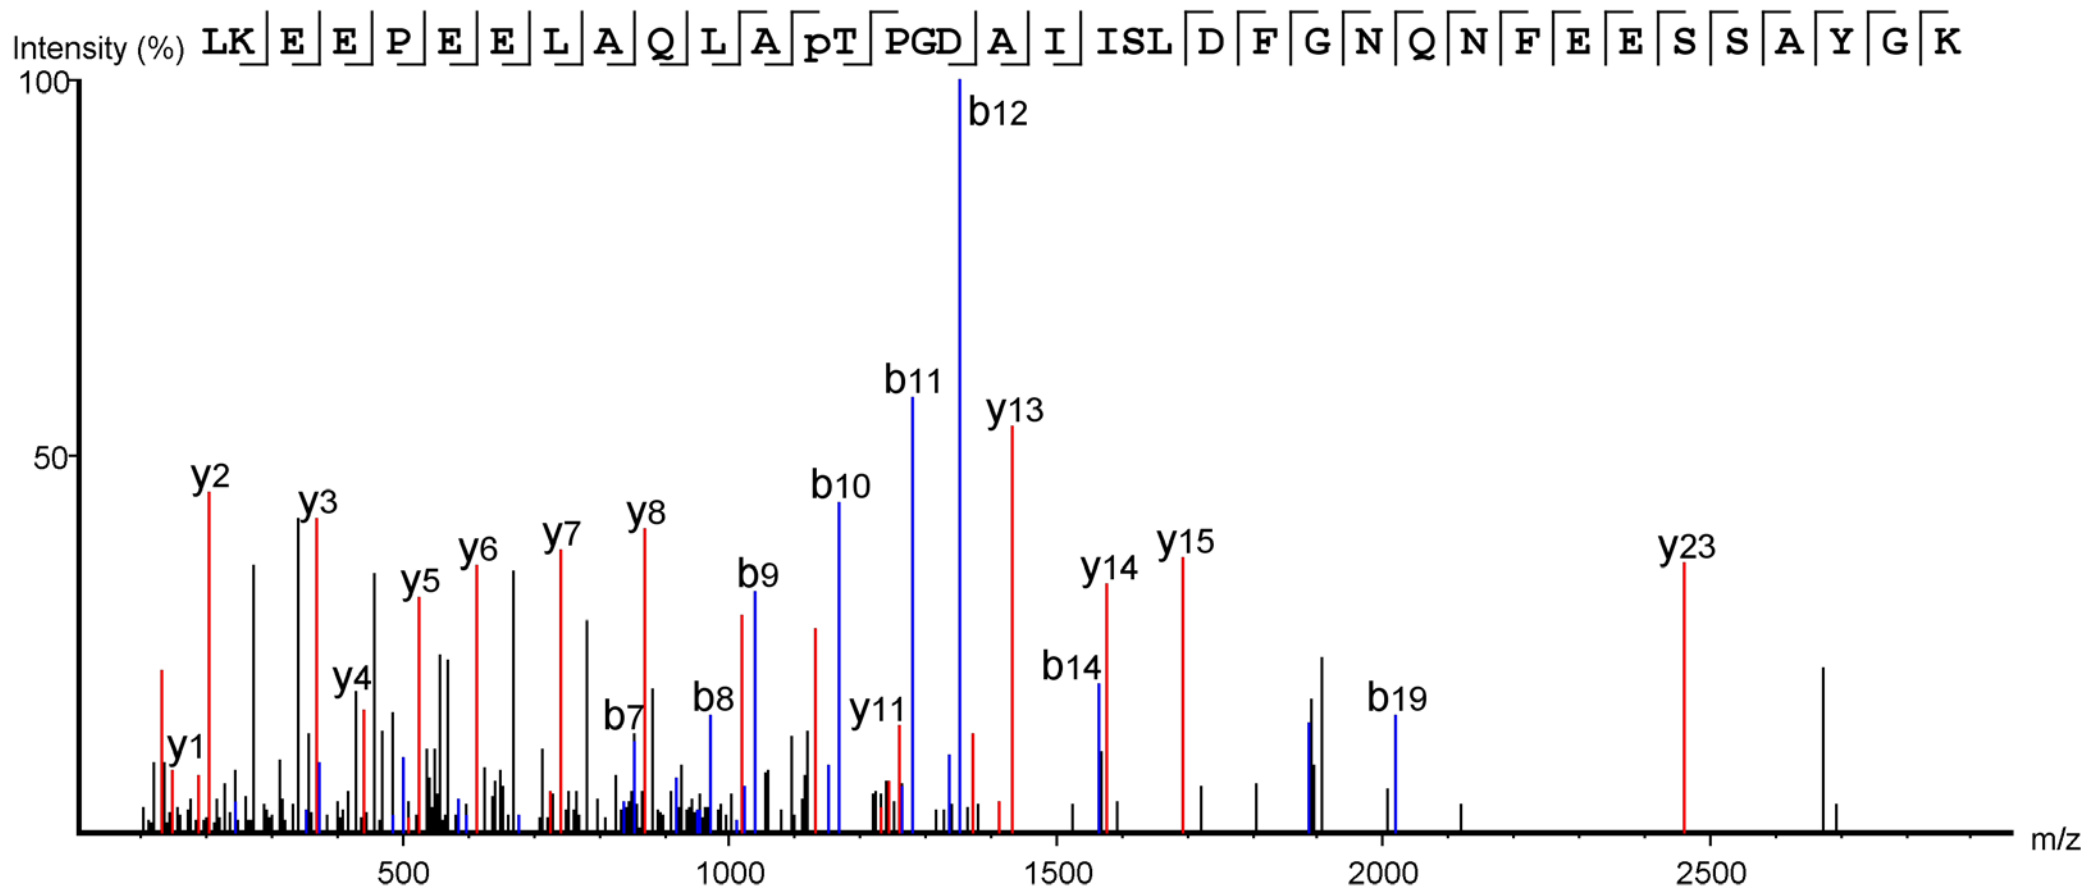

YMT121

Scan #22117

A-351: HIF-2 $\alpha$ <sub>(393-429)</sub>: LKEEP~~E~~LAQLAP(+15.99)TPGD~~A~~IISLDFGNQNFEESSAYGK

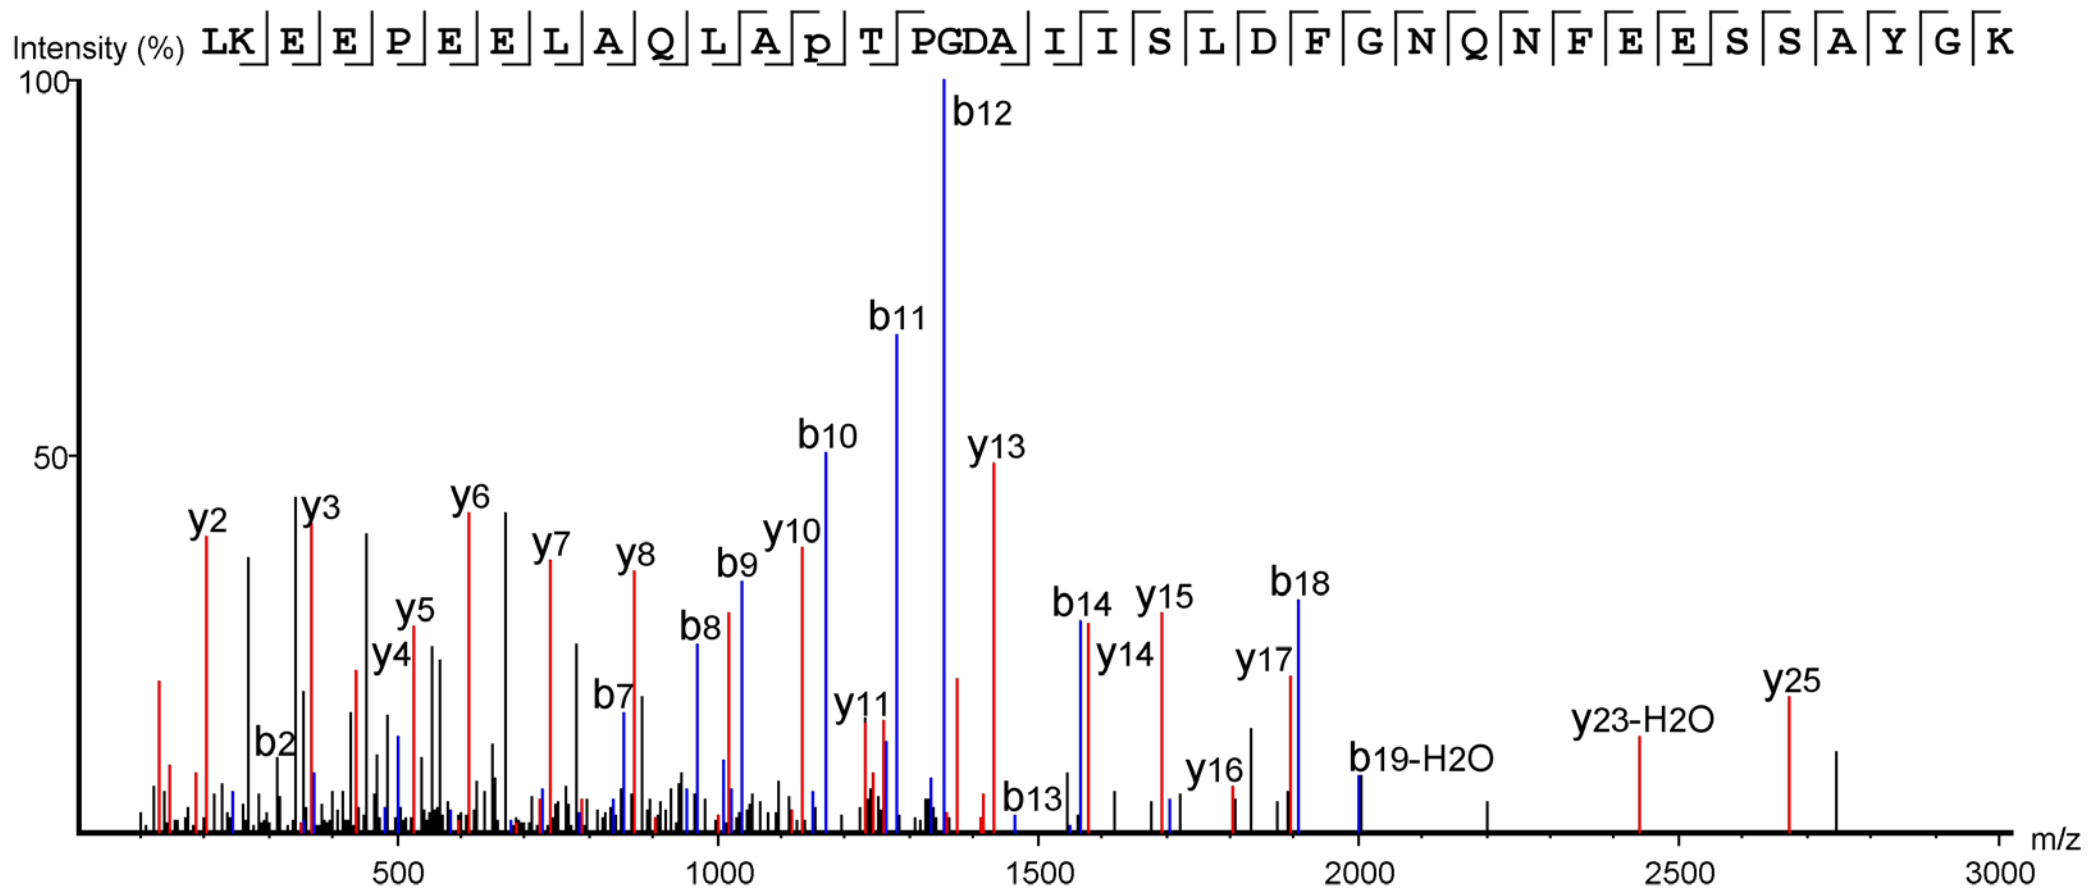

YMT122

Scan #21268

A-352: HIF-3 $\alpha$ <sub>(486-496)</sub>: DLEMLAPYISM

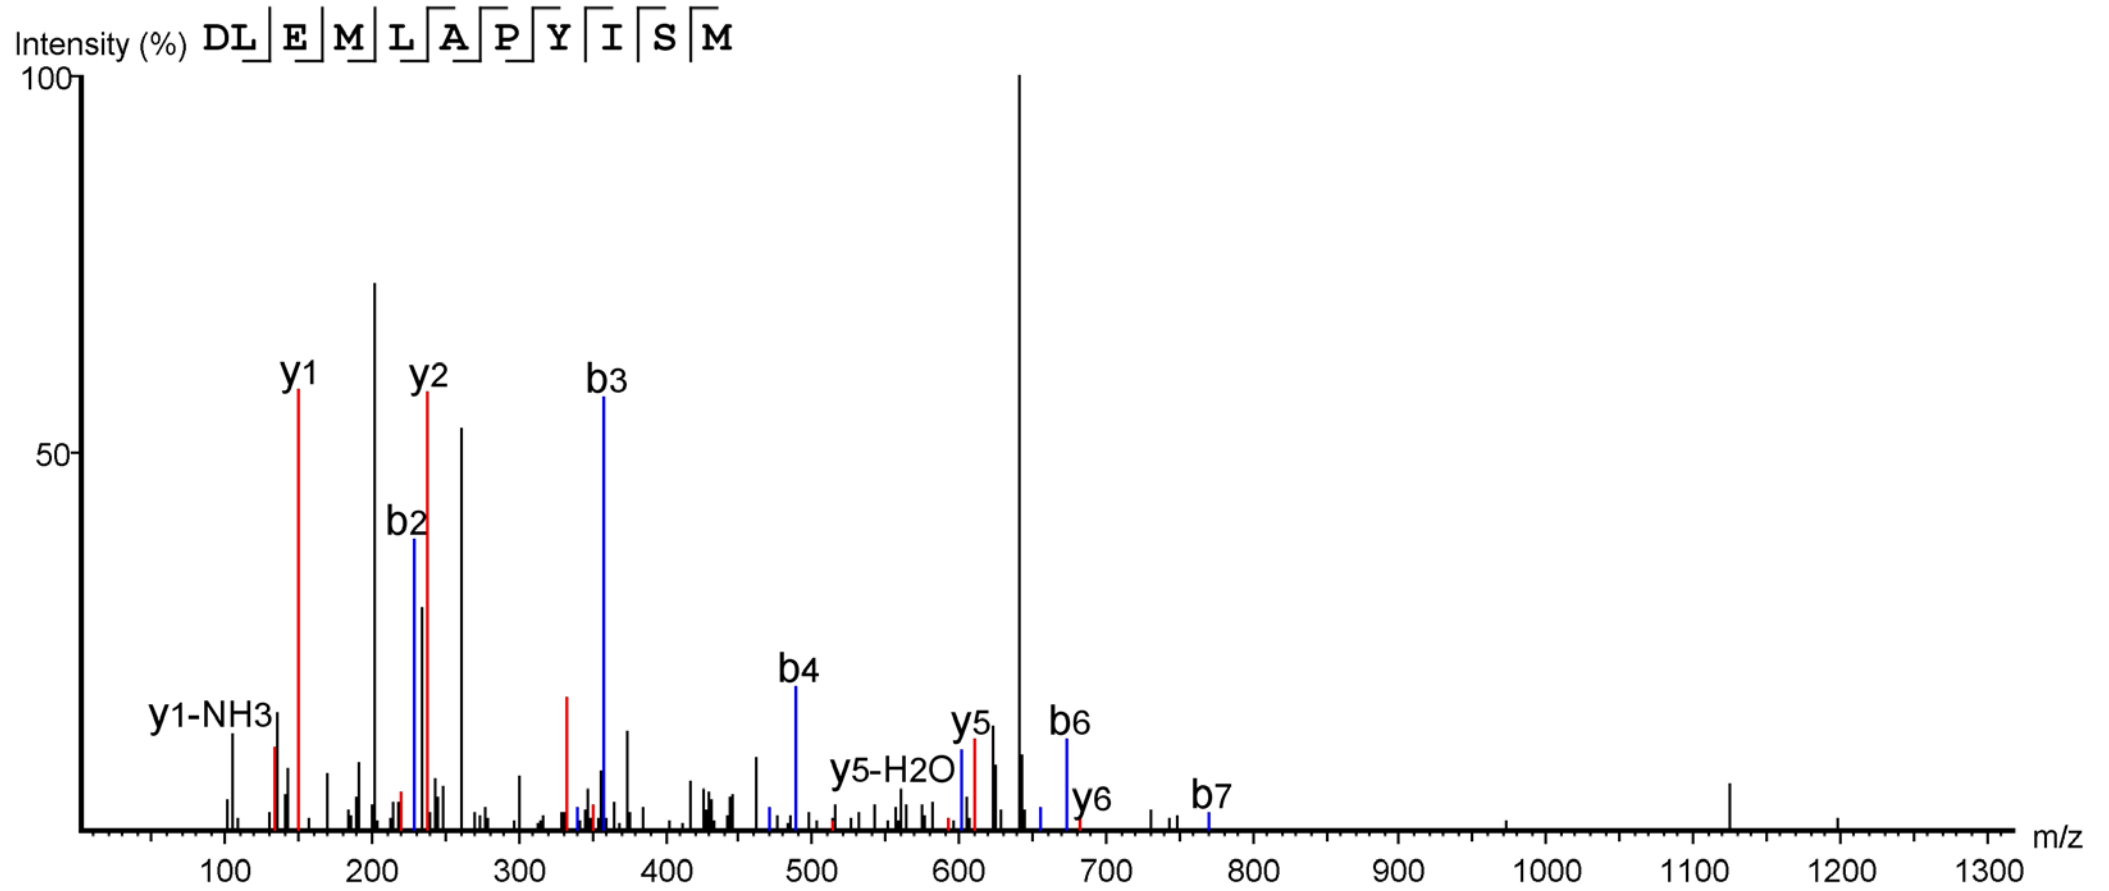

YMT123

Scan #30768



A-353: HIF-3 $\alpha_{(486-496)}$ : DLEM(+15.99)LA<sup>P</sup>YISM

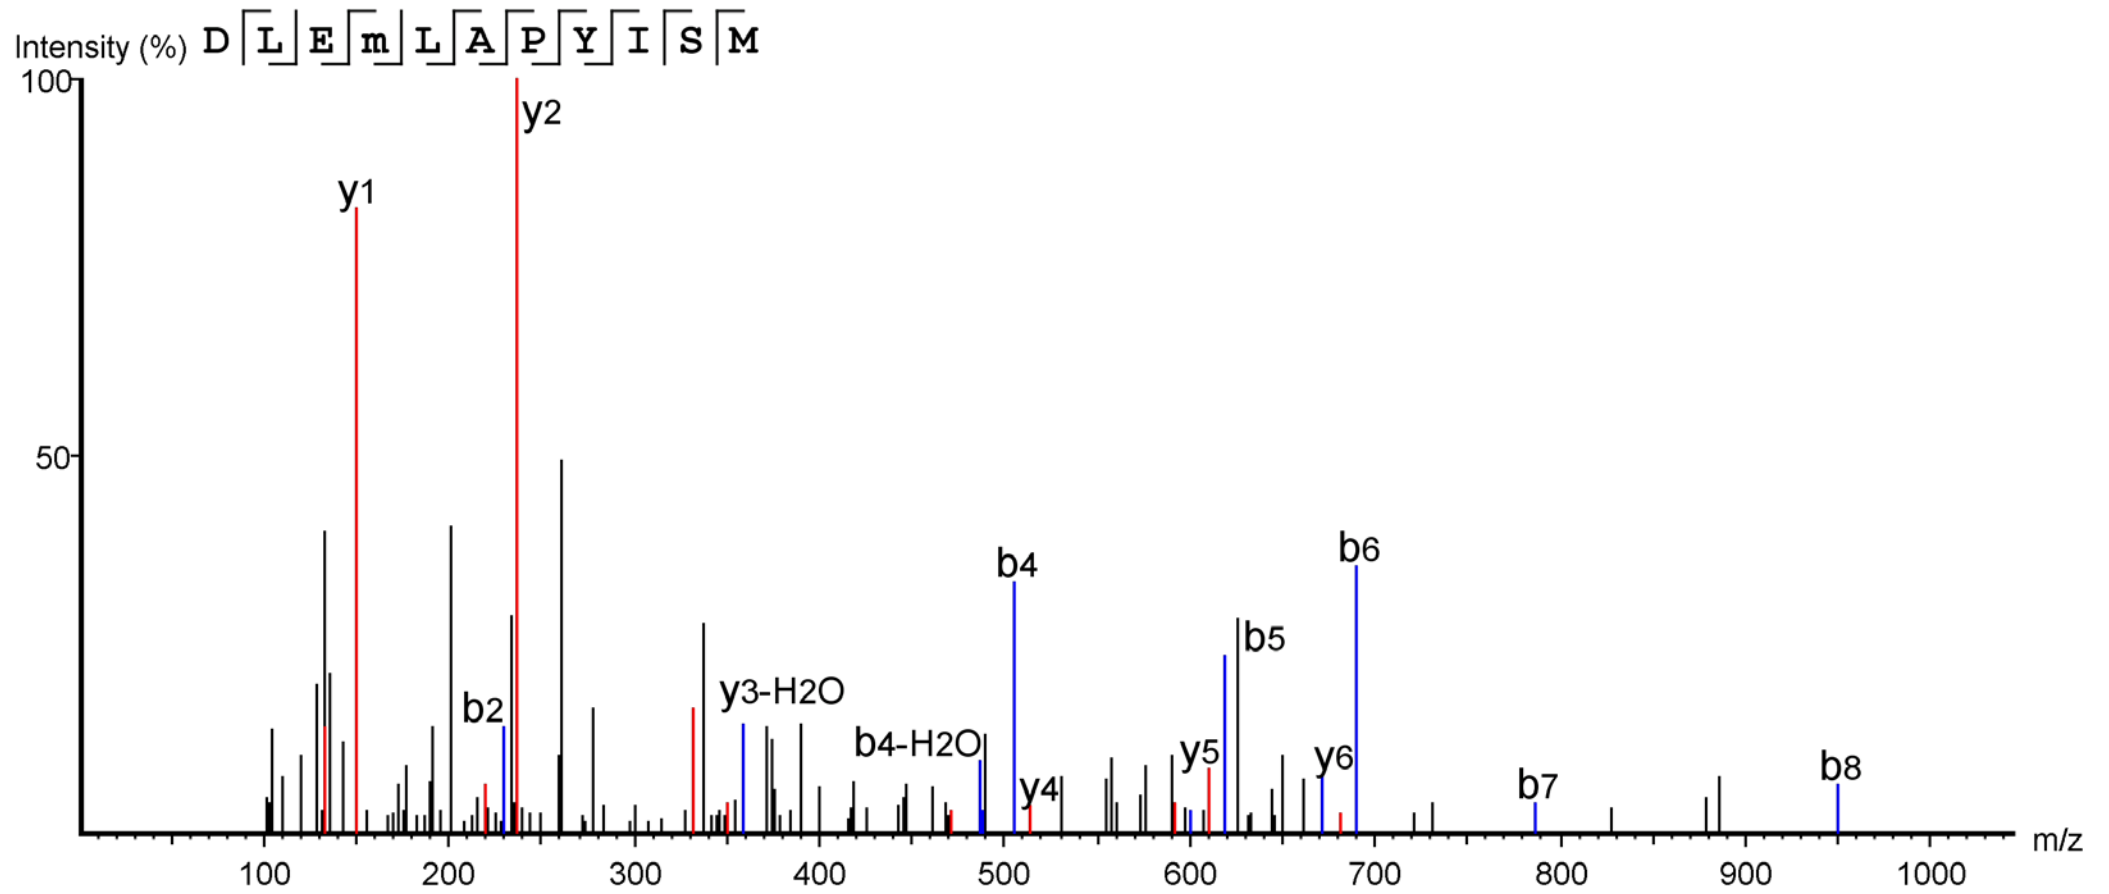

YMT123

Scan #30096

A-354: HIF-3 $\alpha_{(486-496)}$ : DLEM(+15.99)LAPYISM

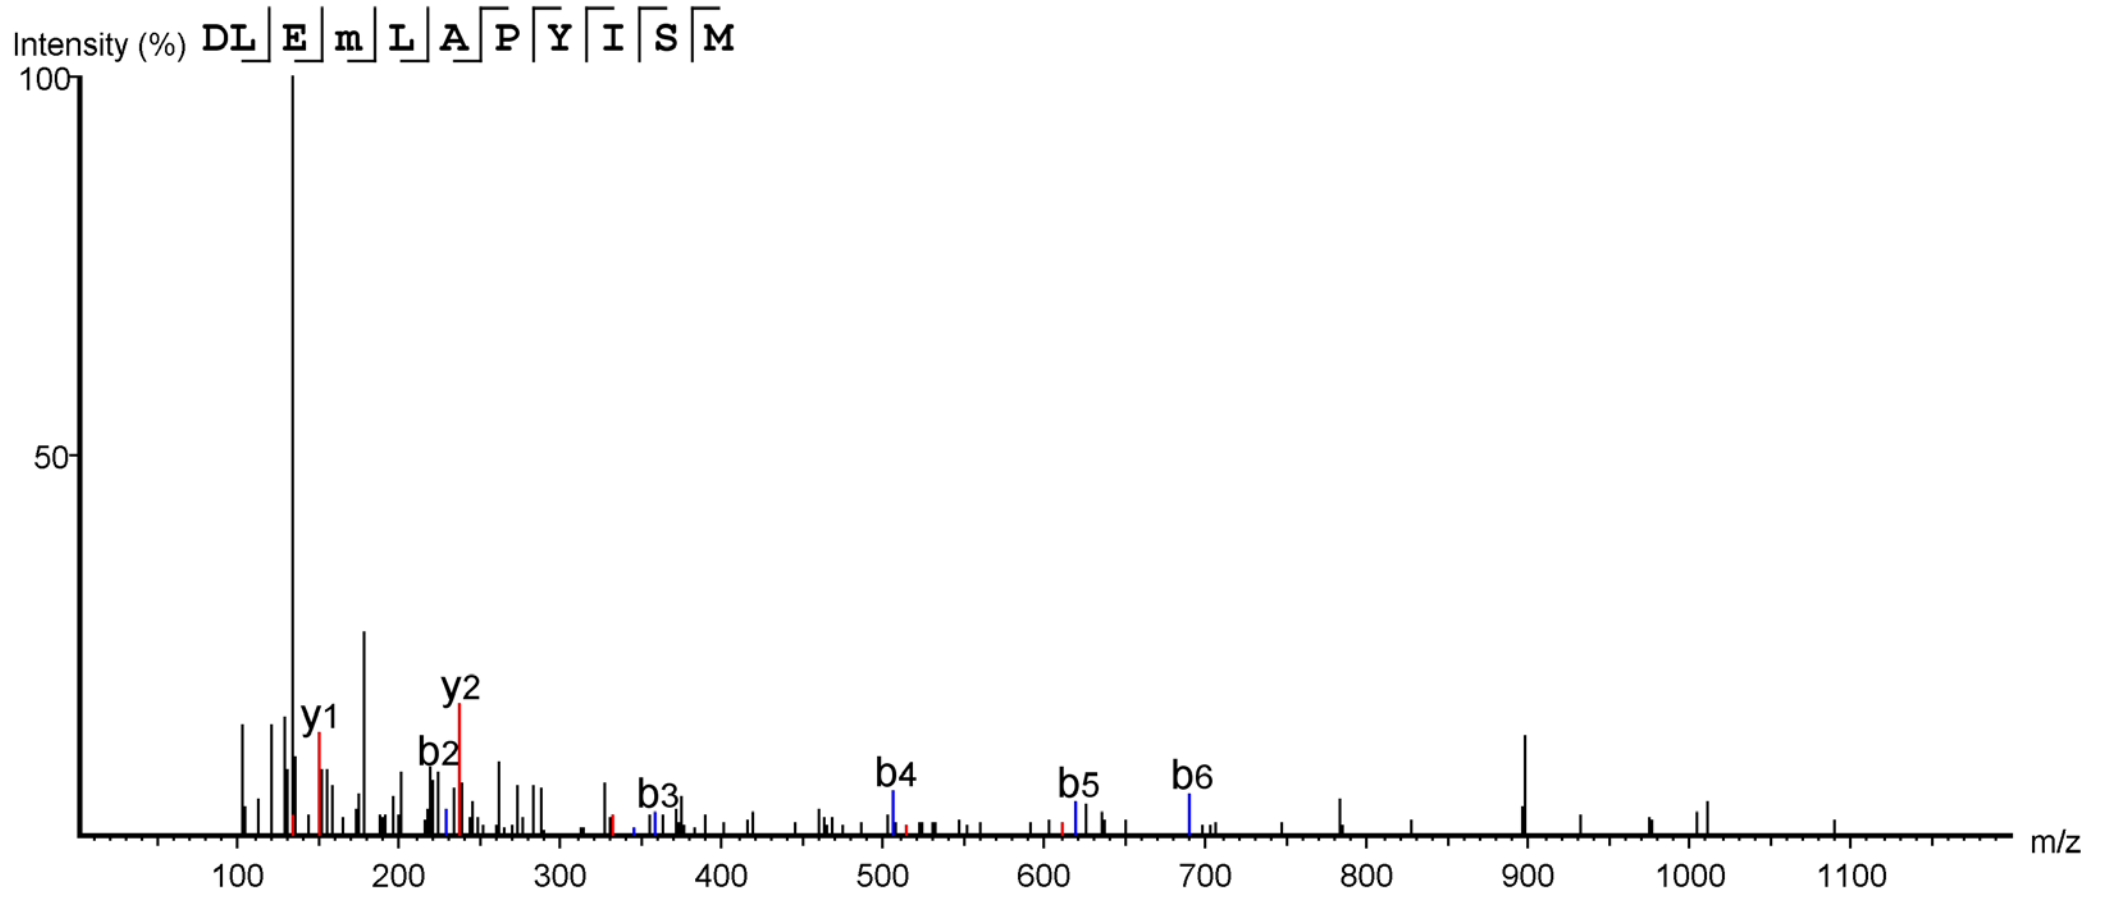

YMT125  
Scan #31759

A-355: HIF-3 $\alpha_{(486-496)}$ : DLEMLAP(+15.99)YISM

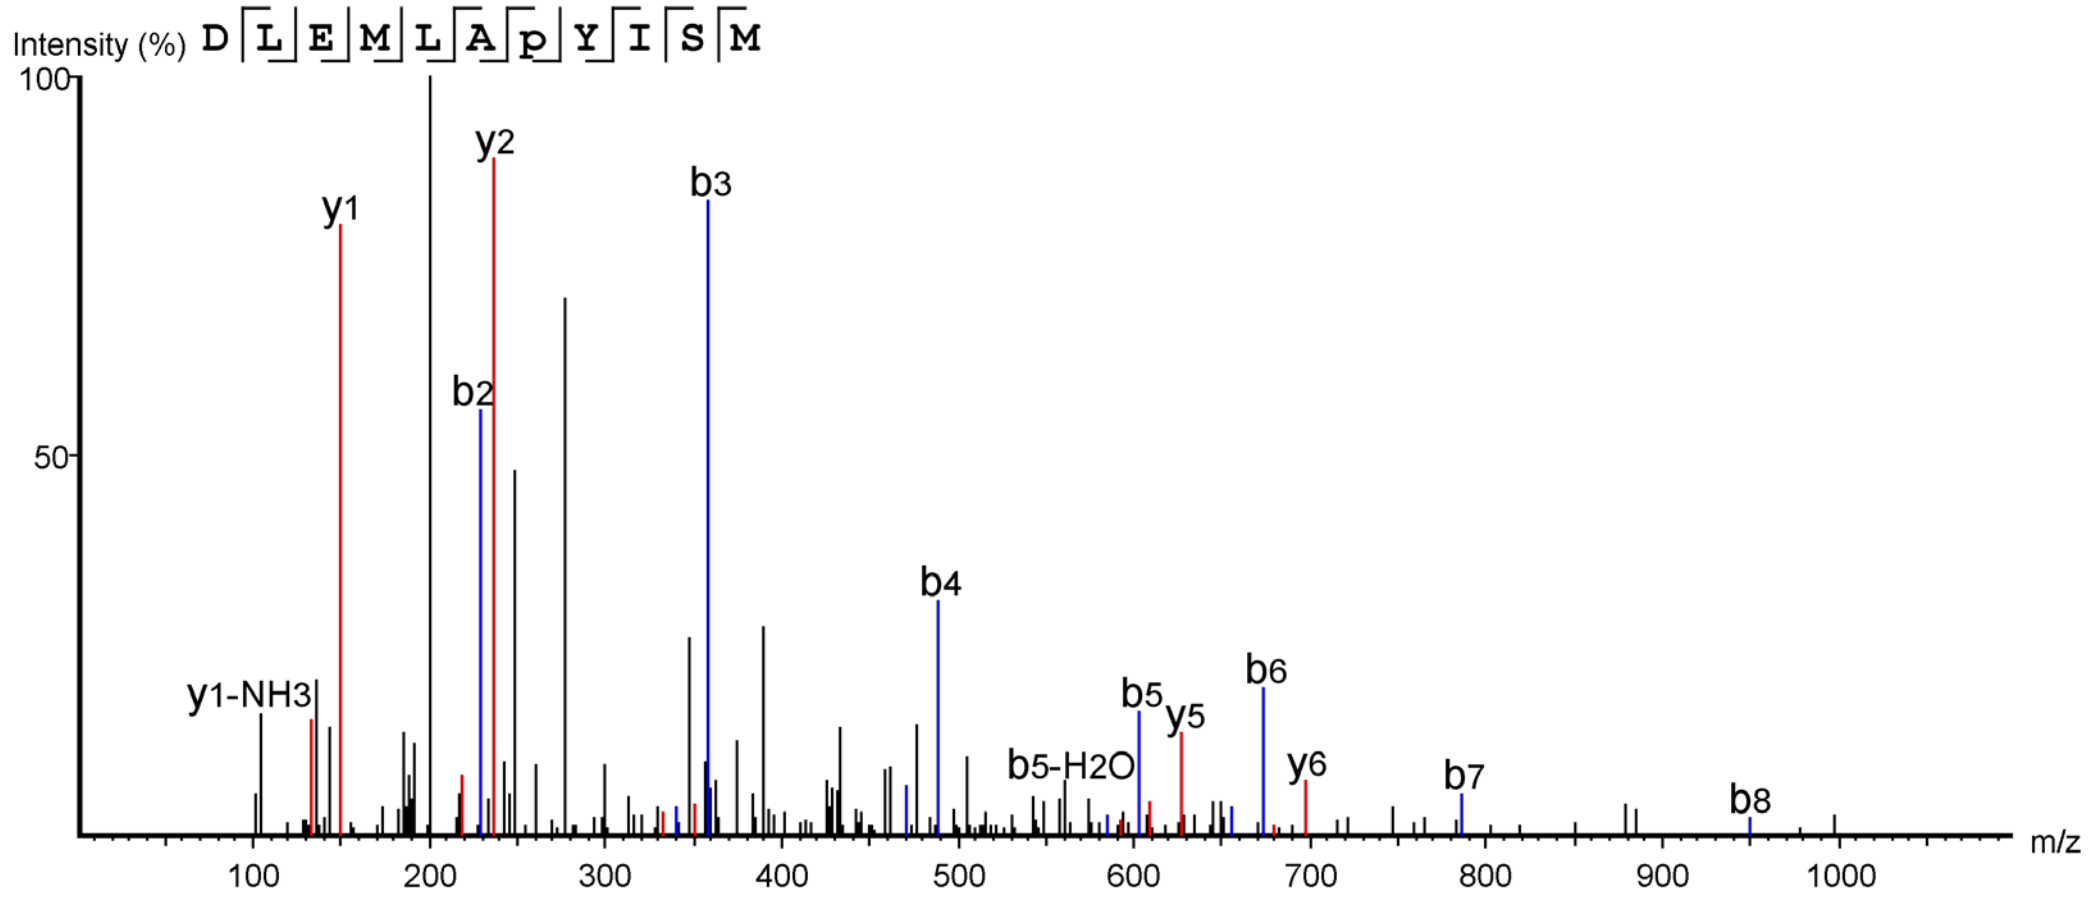

YMT124  
Scan #33172

A-356: HIF-3 $\alpha_{(486-496)}$ : DLEMLAP(+15.99)YISM

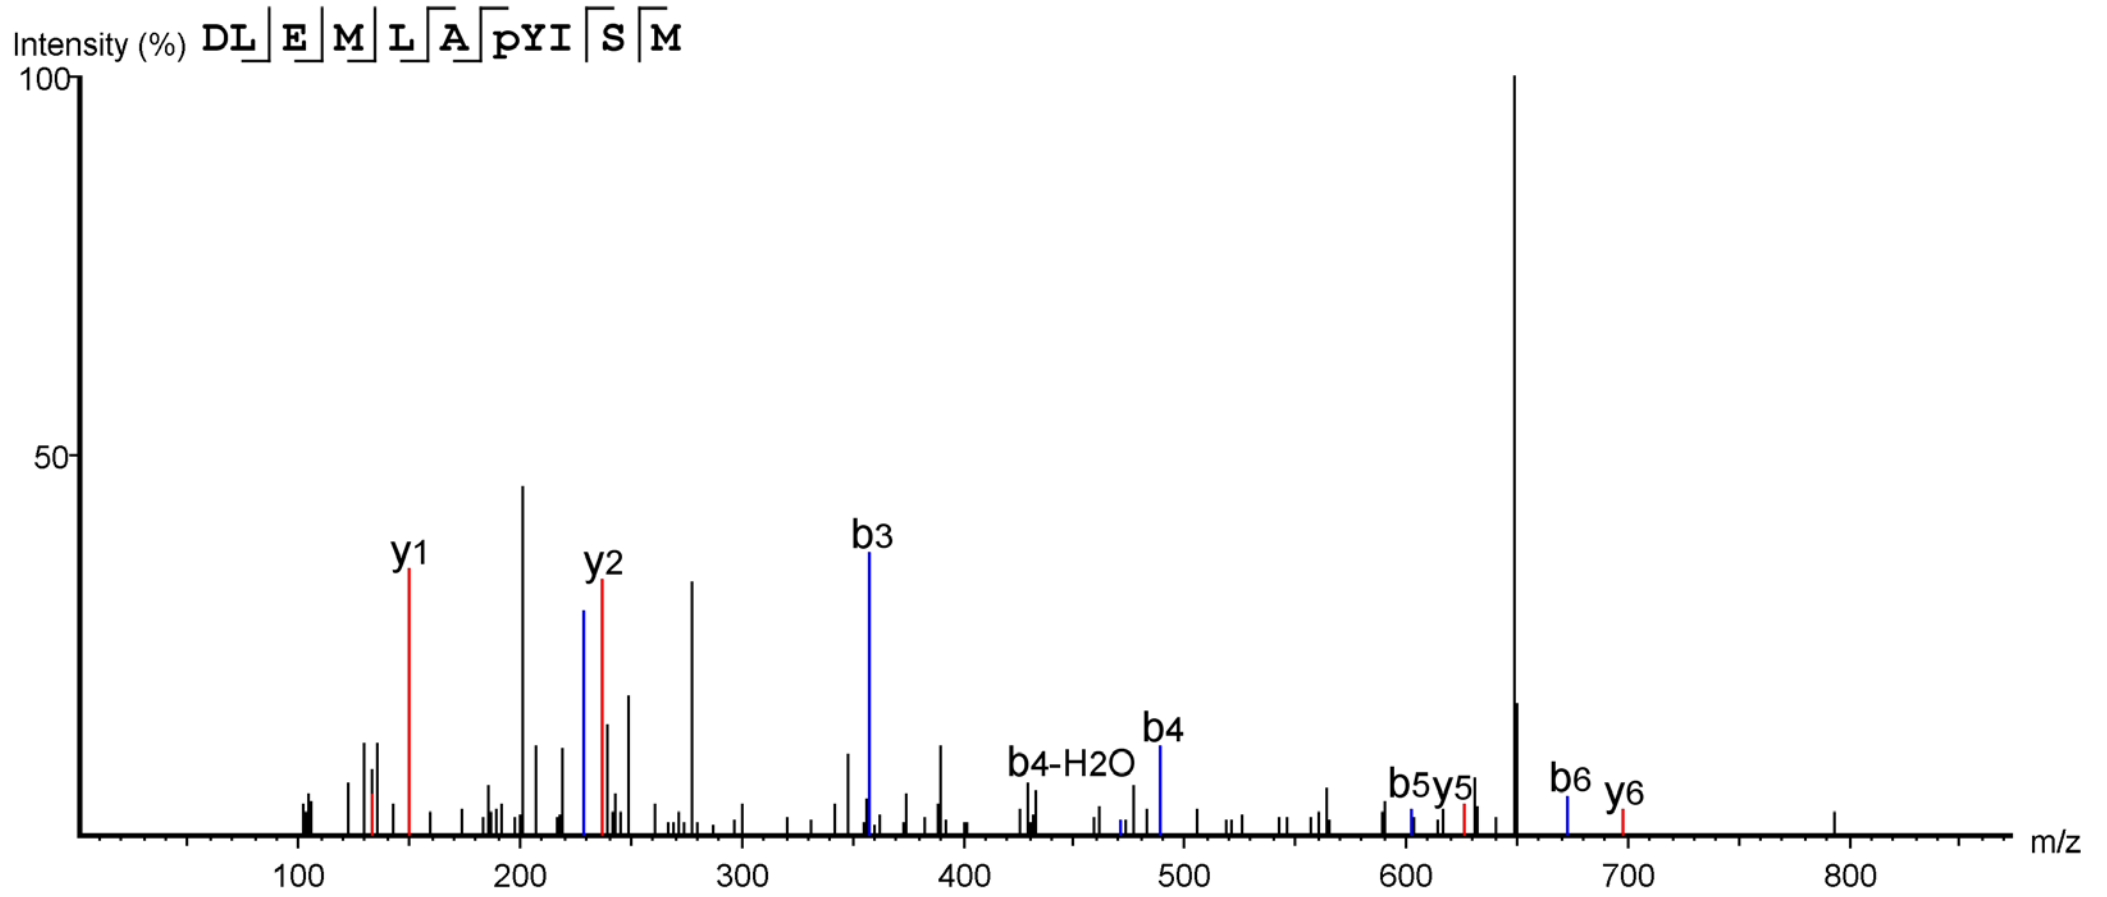

YMT125

Scan #32461

A-357: HIF-3 $\alpha_{(486-496)}$ : DLEMLAP(+15.99)YISM

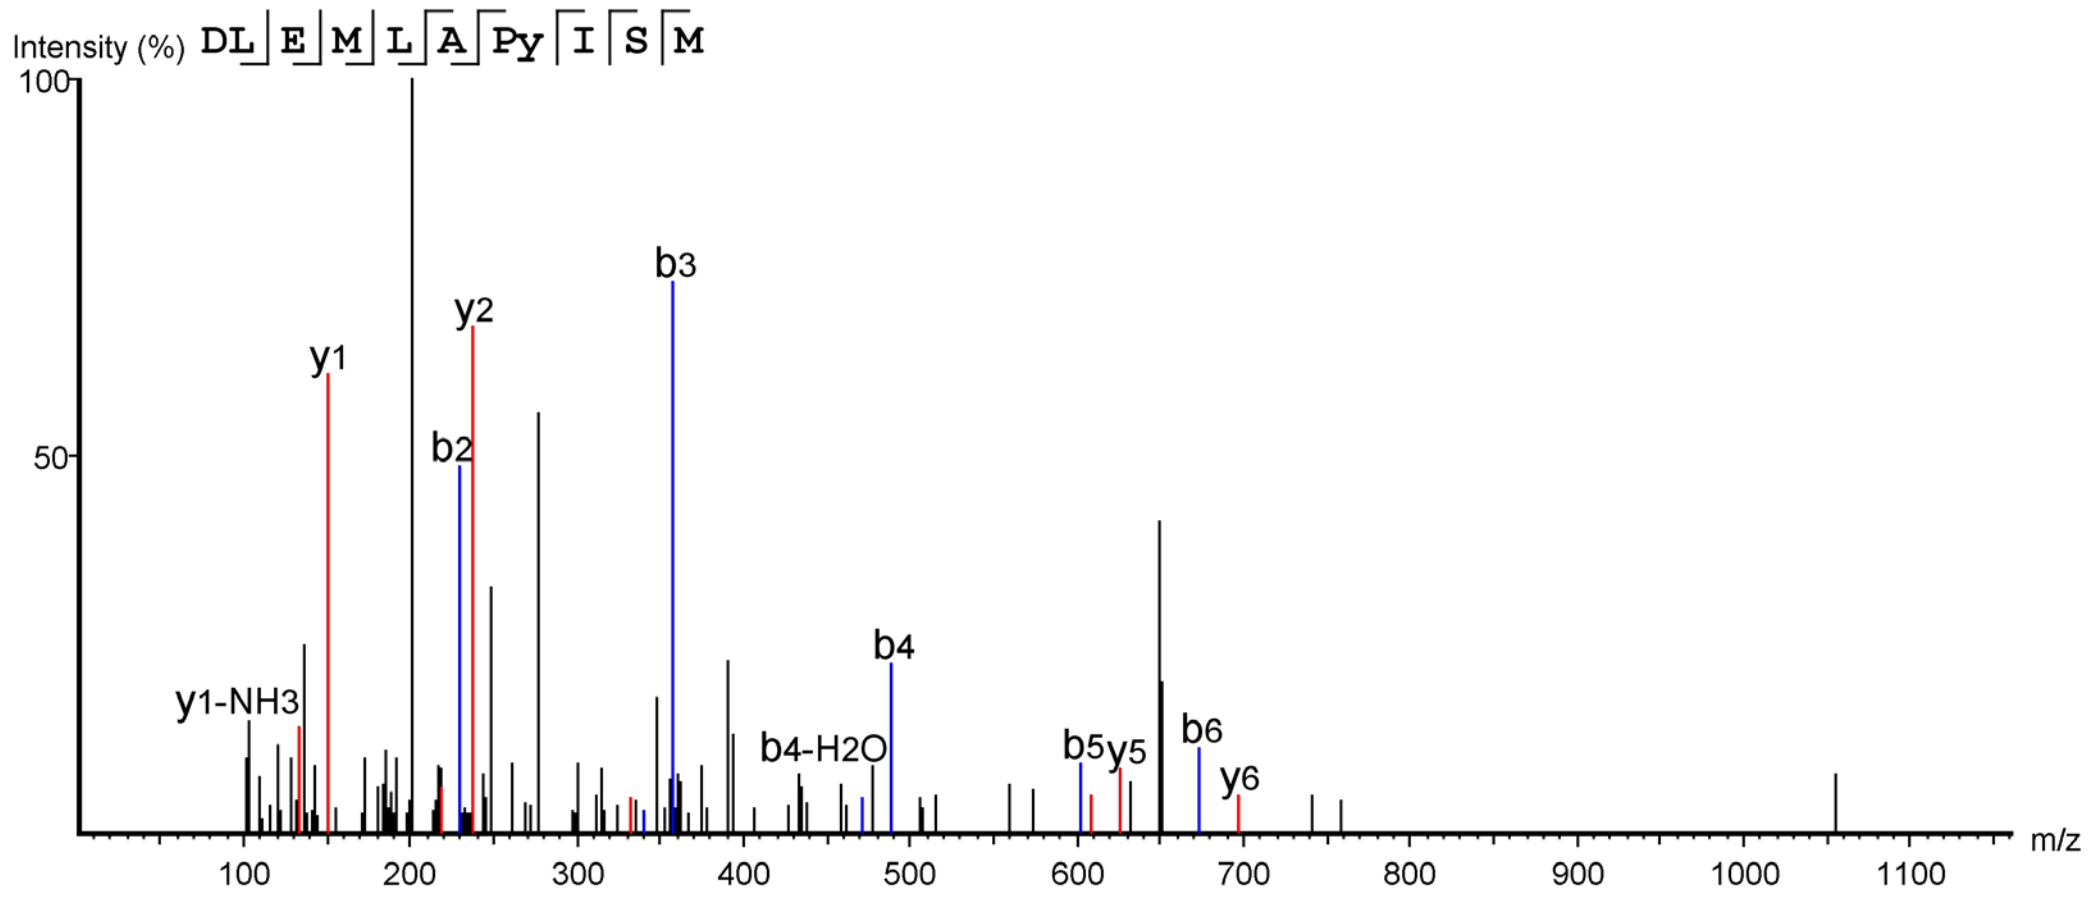

YMT126

Scan #30783

A-358: HIF-3 $\alpha_{(486-496)}$ : DLEMLAPYISM(+15.99)

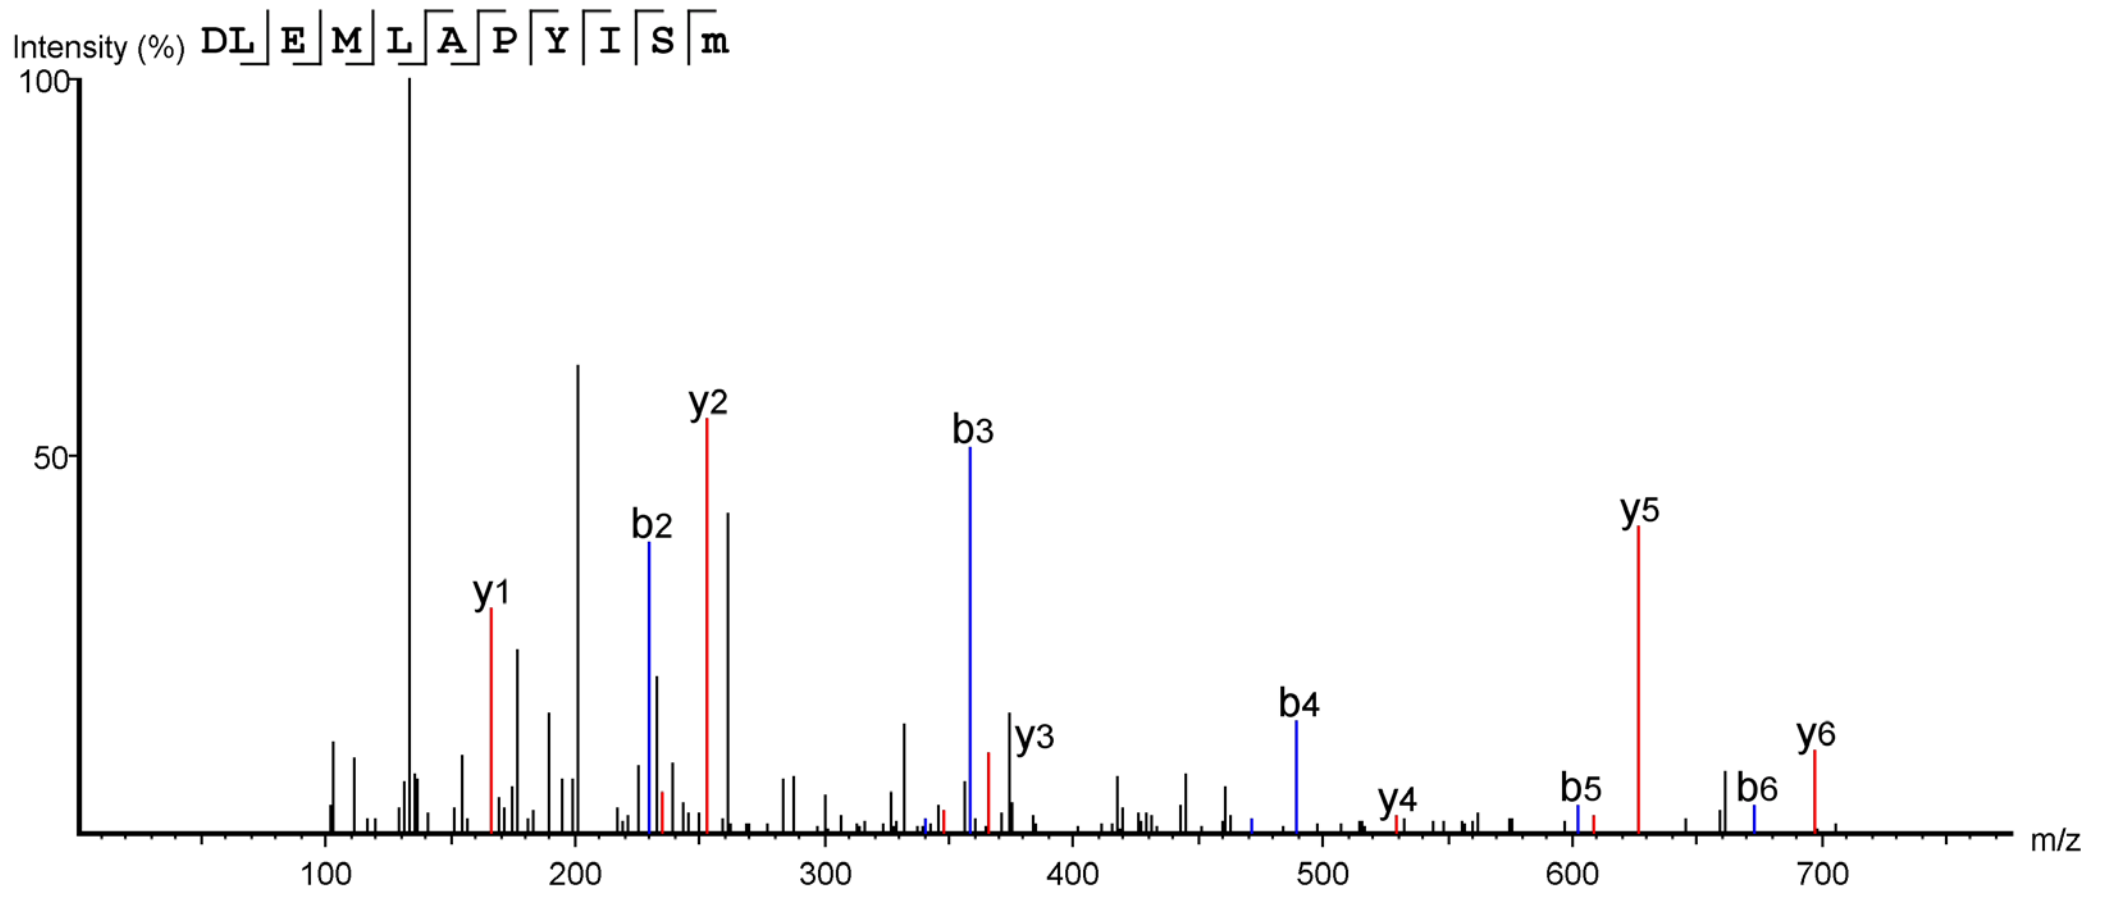

YMT123

Scan #29743

A-359: HIF-3 $\alpha_{(486-496)}$ : DLEMLAPYISM(+15.99)

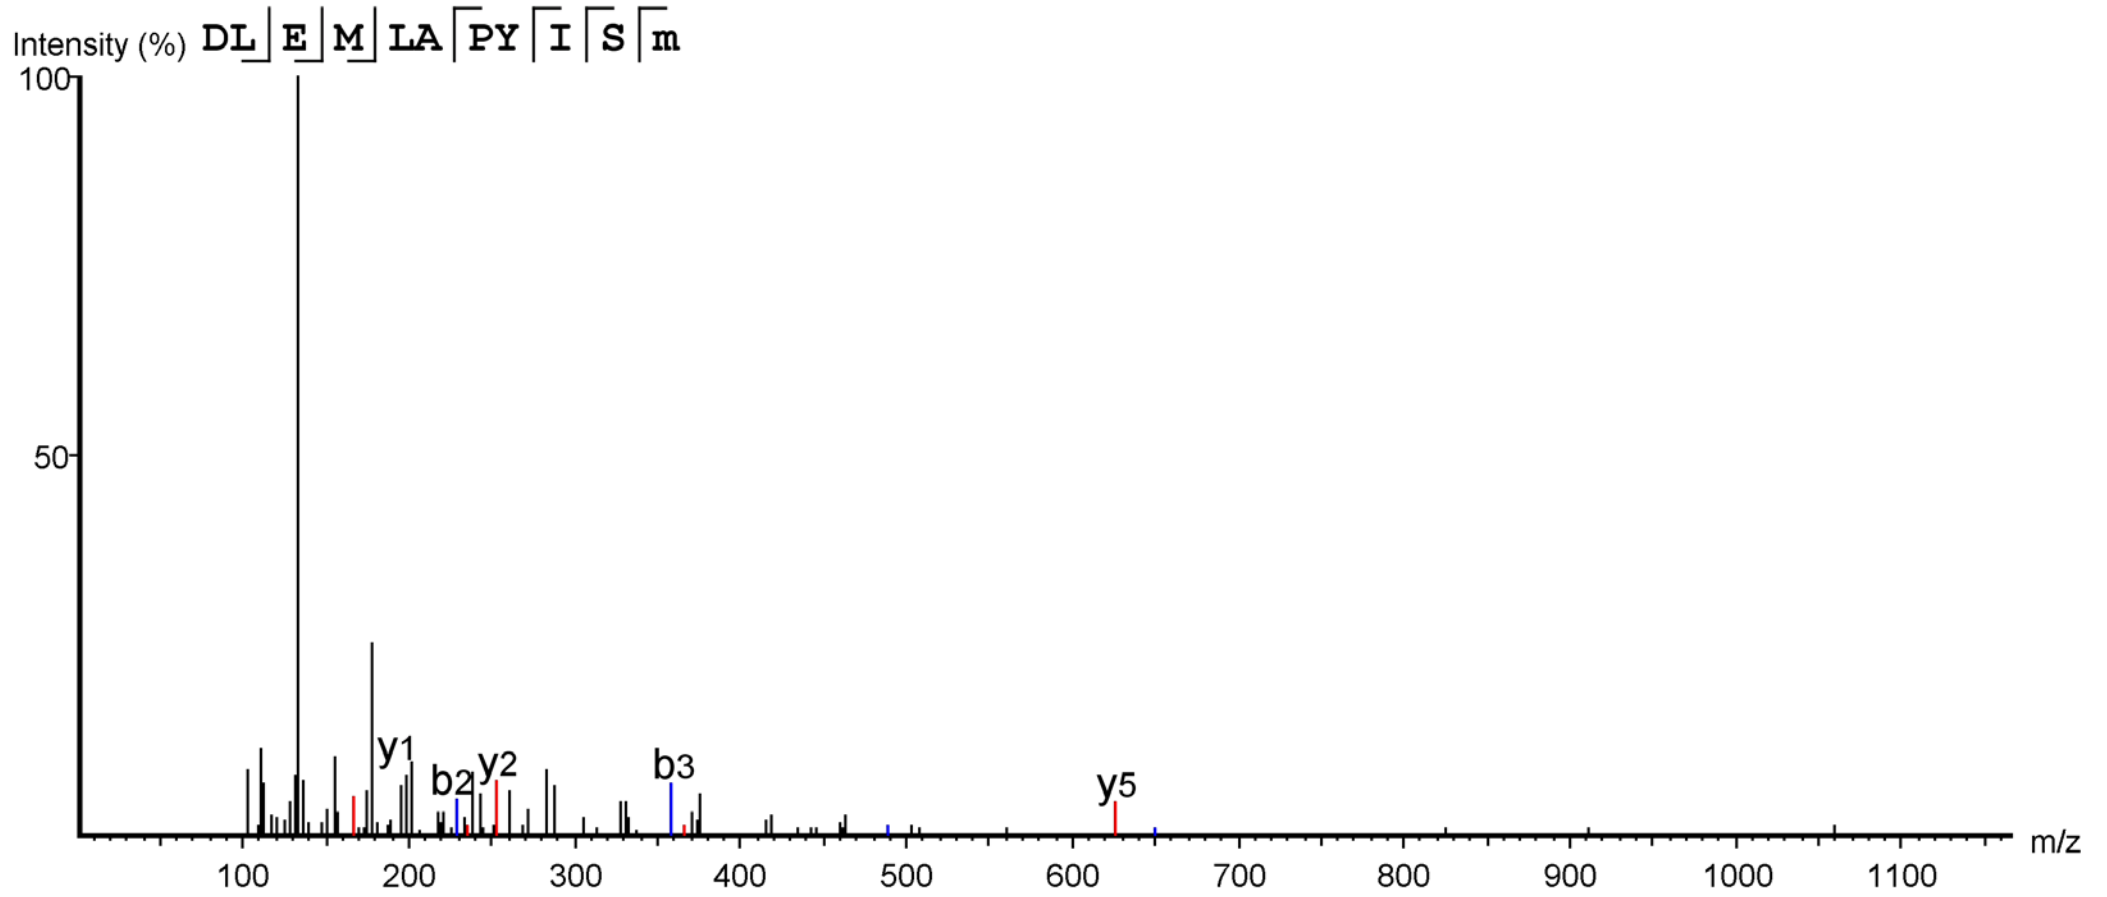

YMT124

Scan #32130

A-360: HIF-3 $\alpha_{(486-496)}$ : DLEMLAPYISM(+15.99)

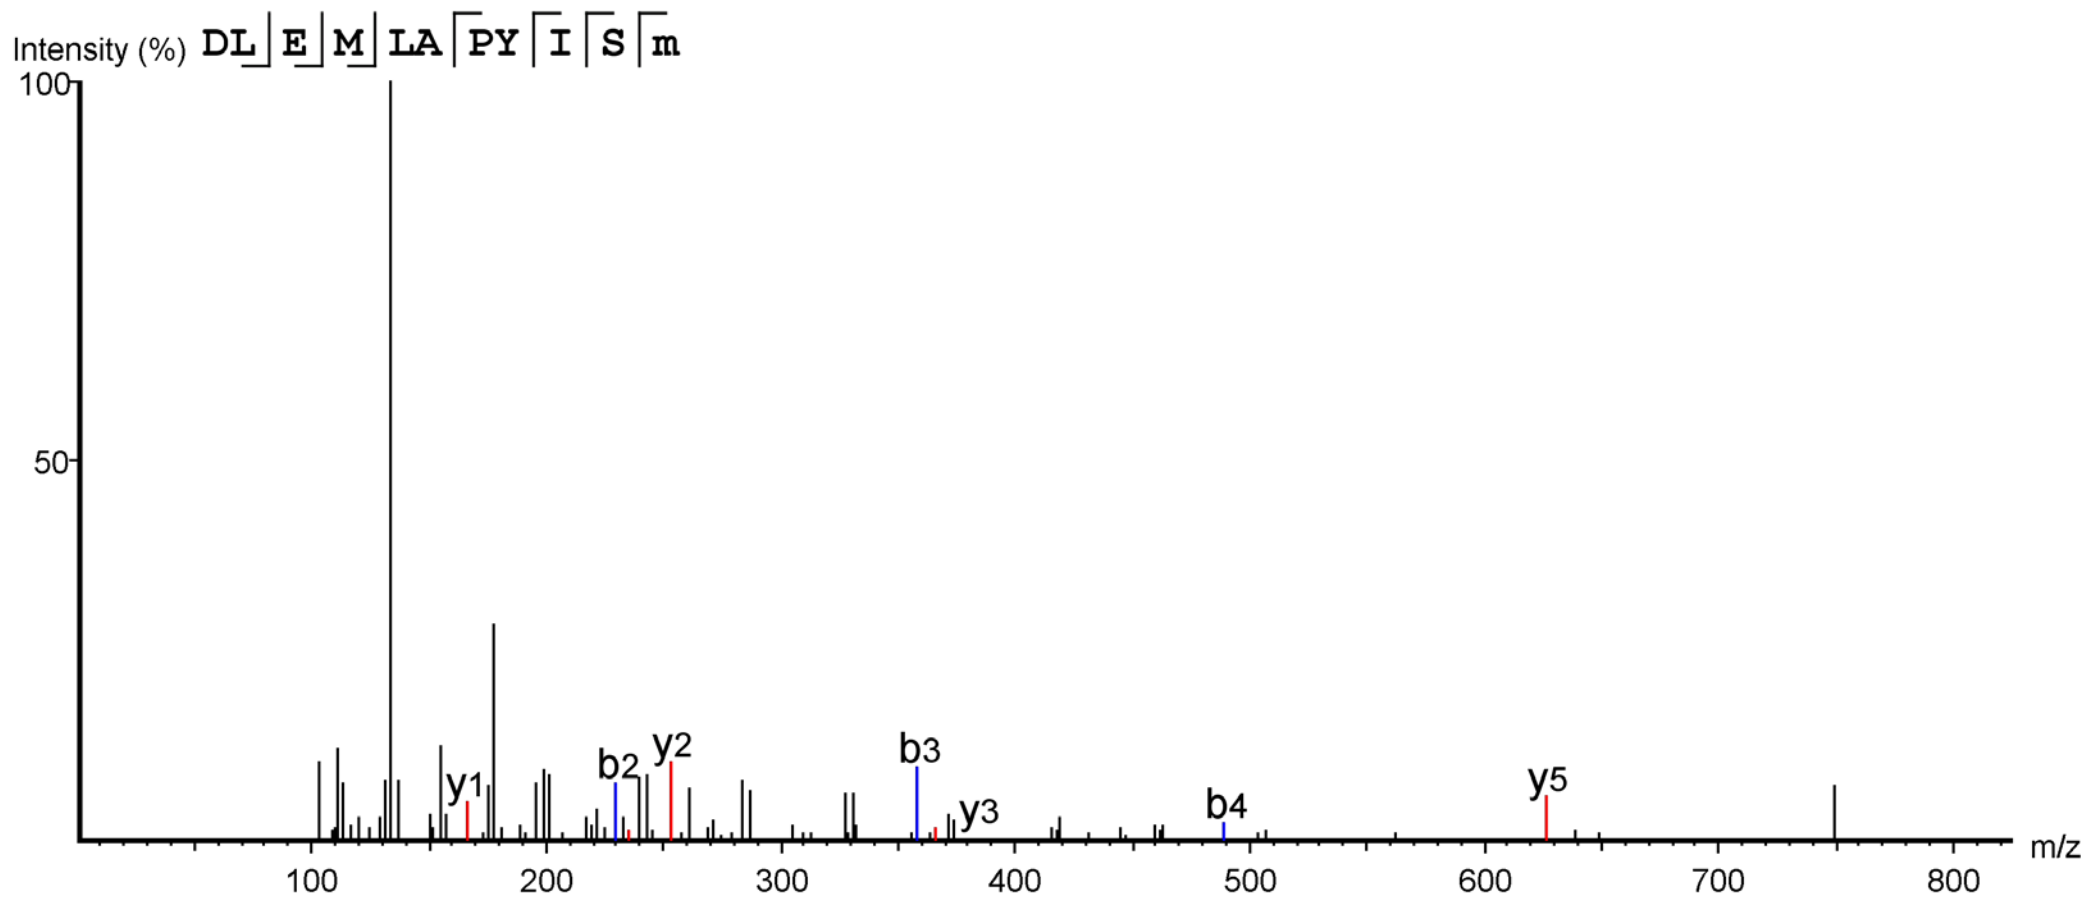

YMT125

Scan #31341



A-361: HIF-3 $\alpha$ (486-496): DLEMLAPYISM(+15.99)

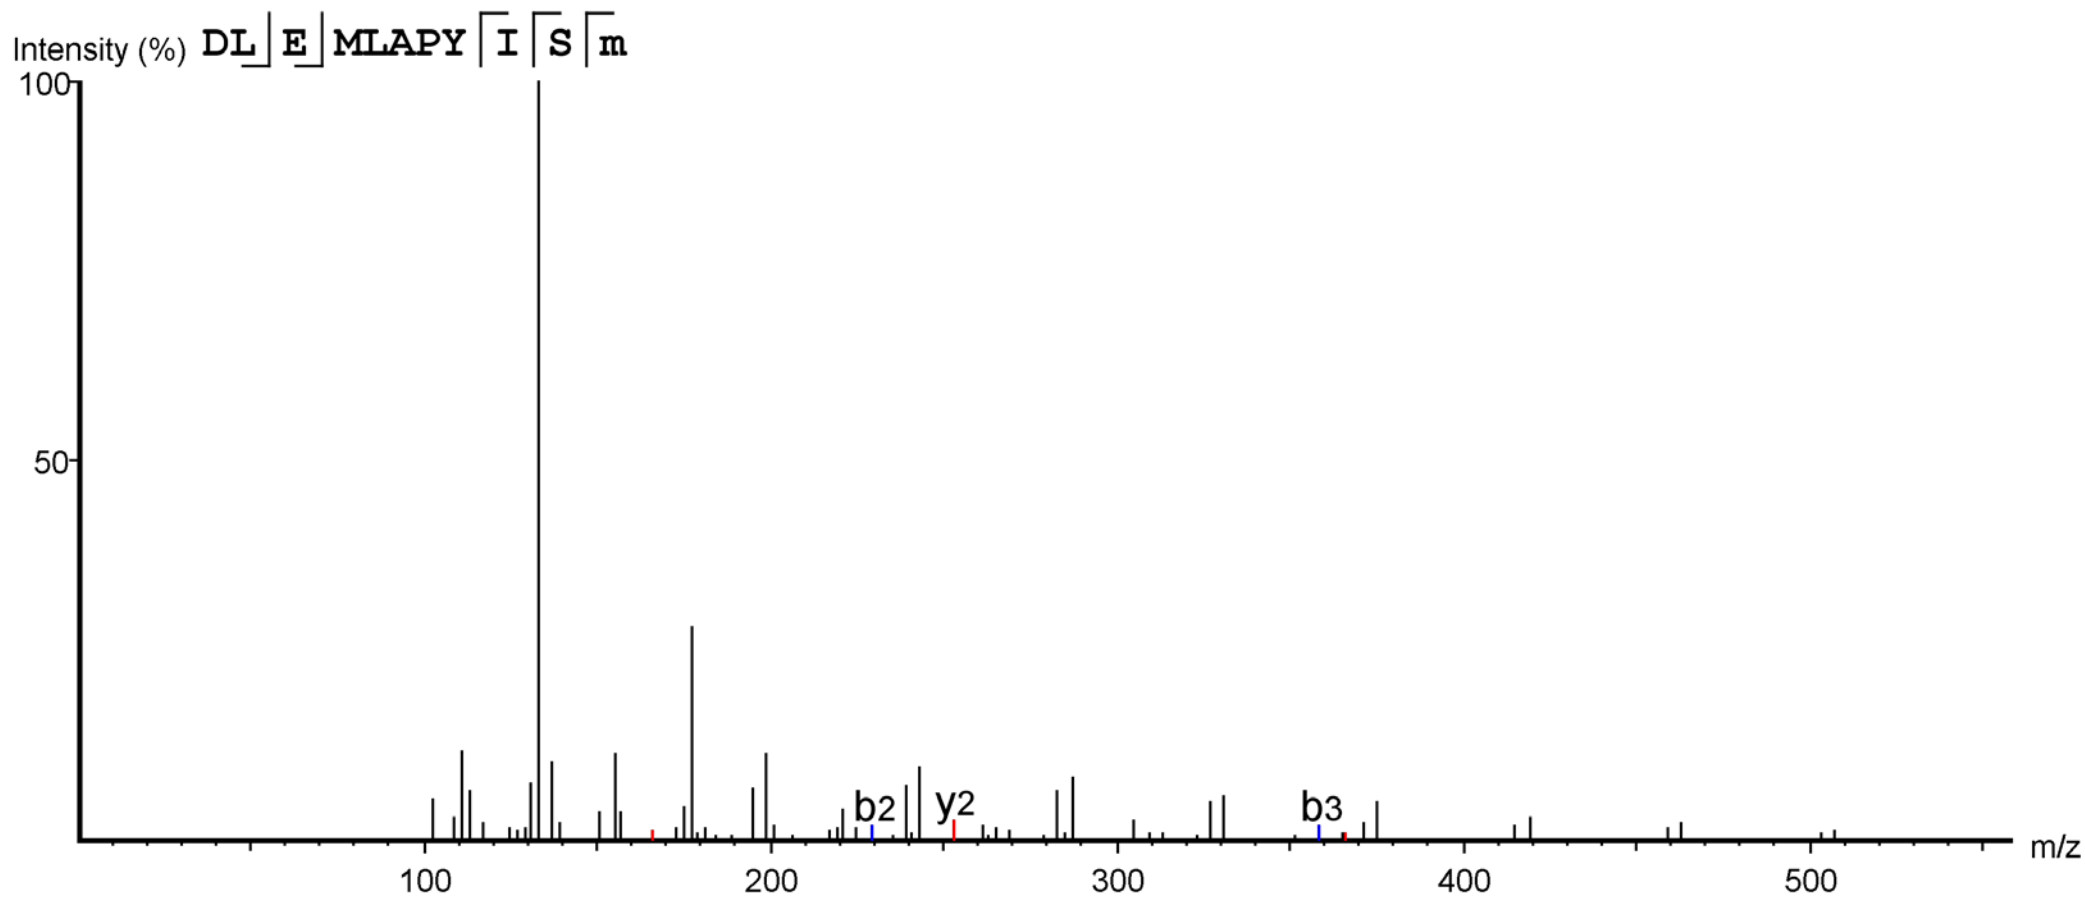

YMT126

Scan #29644

A-362: HIF-3 $\alpha_{(486-496)}$ : DLEM(+15.99)LAP(+15.99)YISM

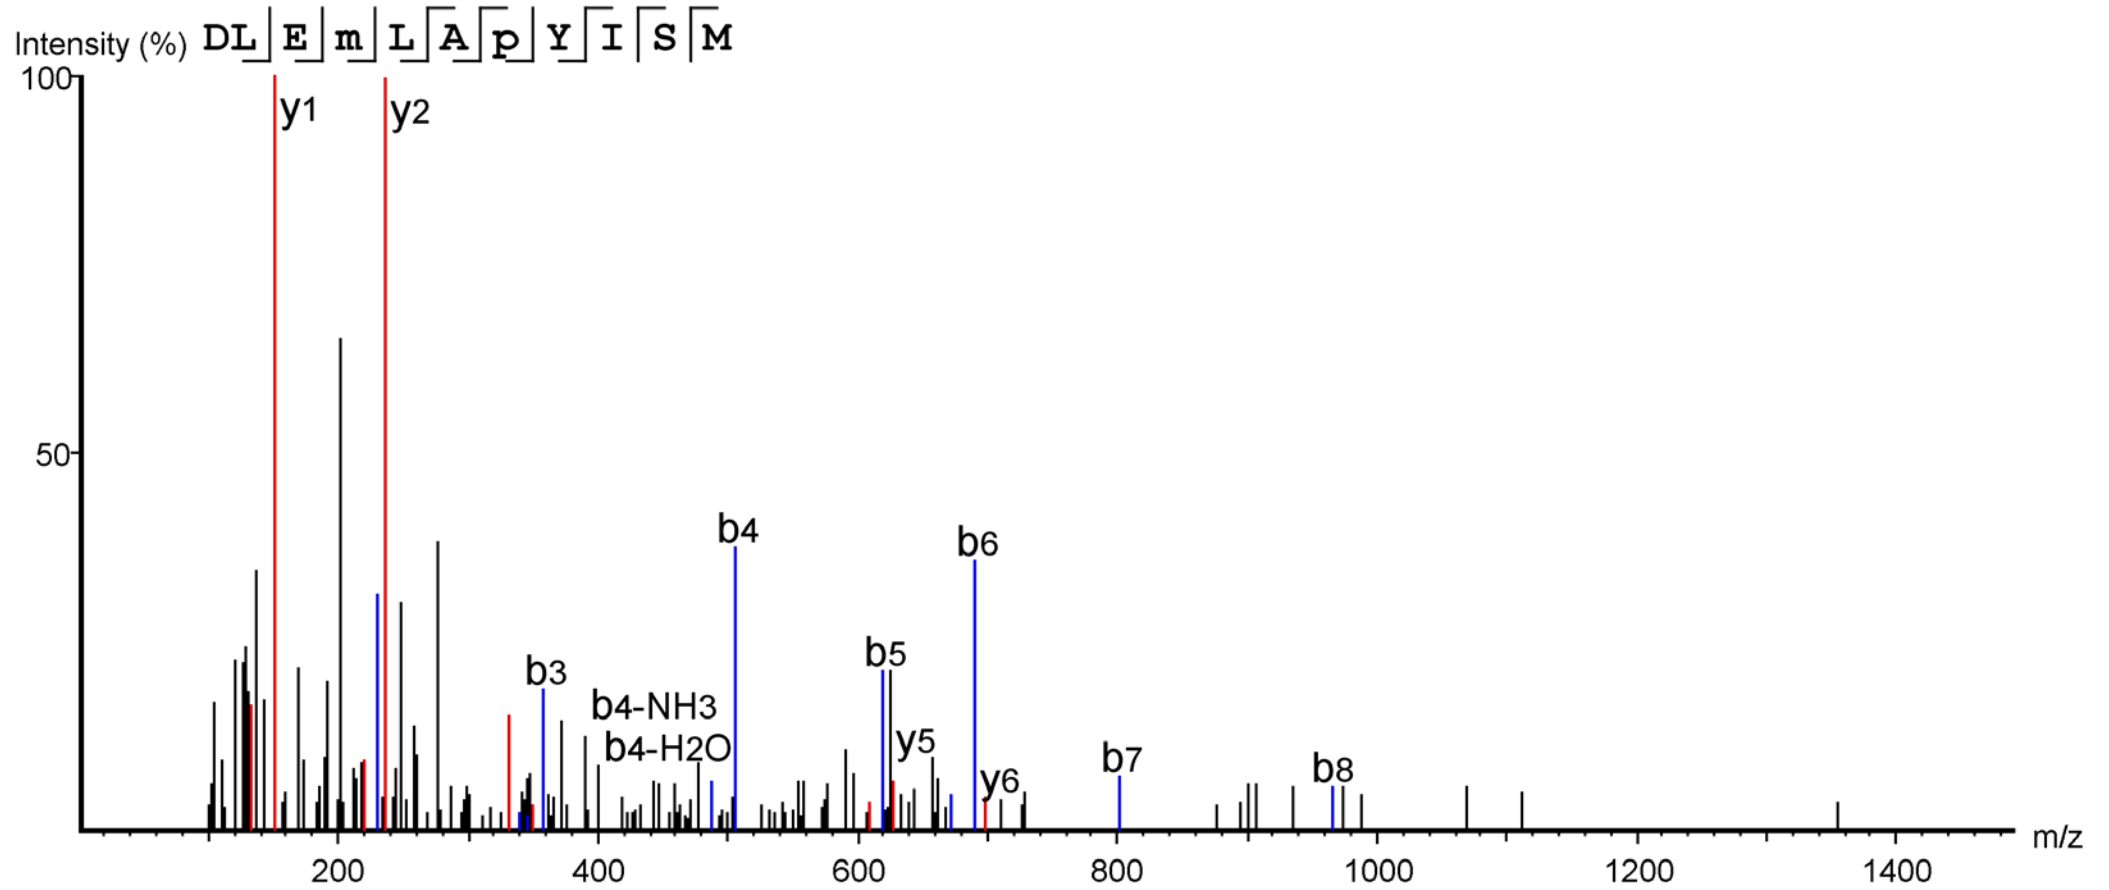

YMT123

Scan #29200

A-363: HIF-3 $\alpha_{(486-496)}$ : DLEM(+15.99)LAP(+15.99)YISM

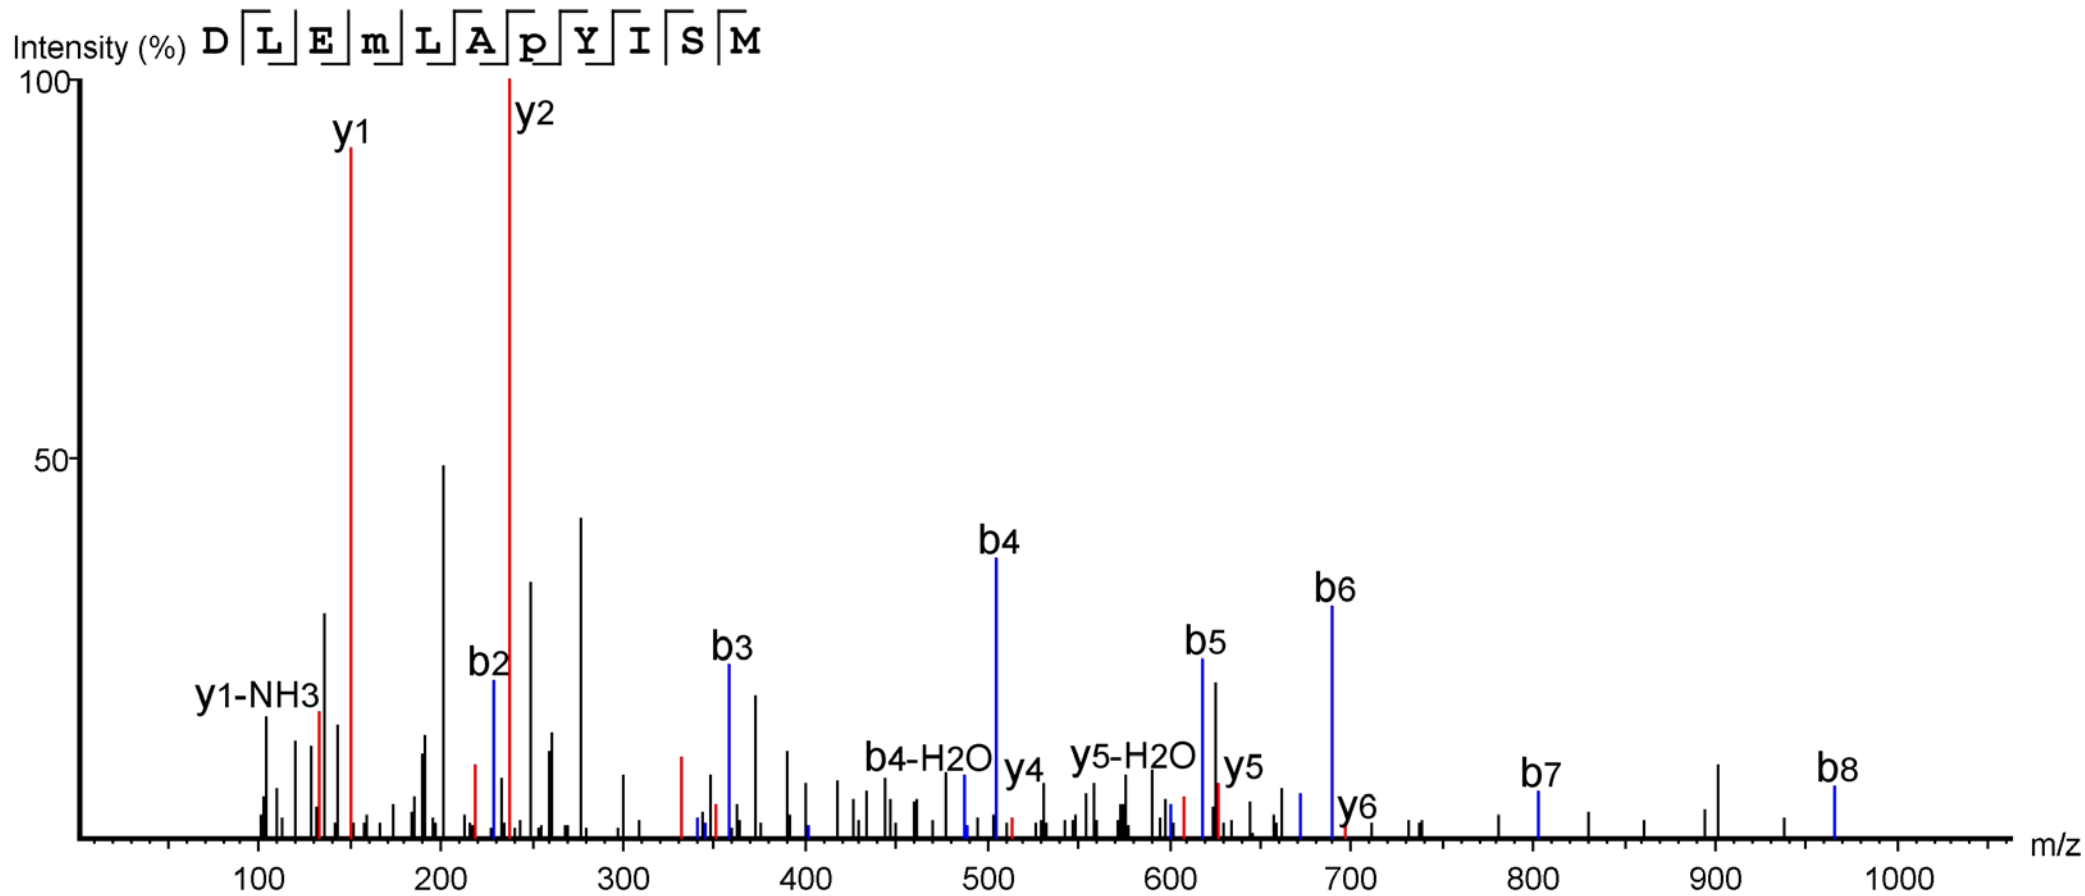

YMT124

Scan #31777

A-364: HIF-3 $\alpha_{(486-496)}$ : DLEM(+15.99)LAP(+15.99)YISM

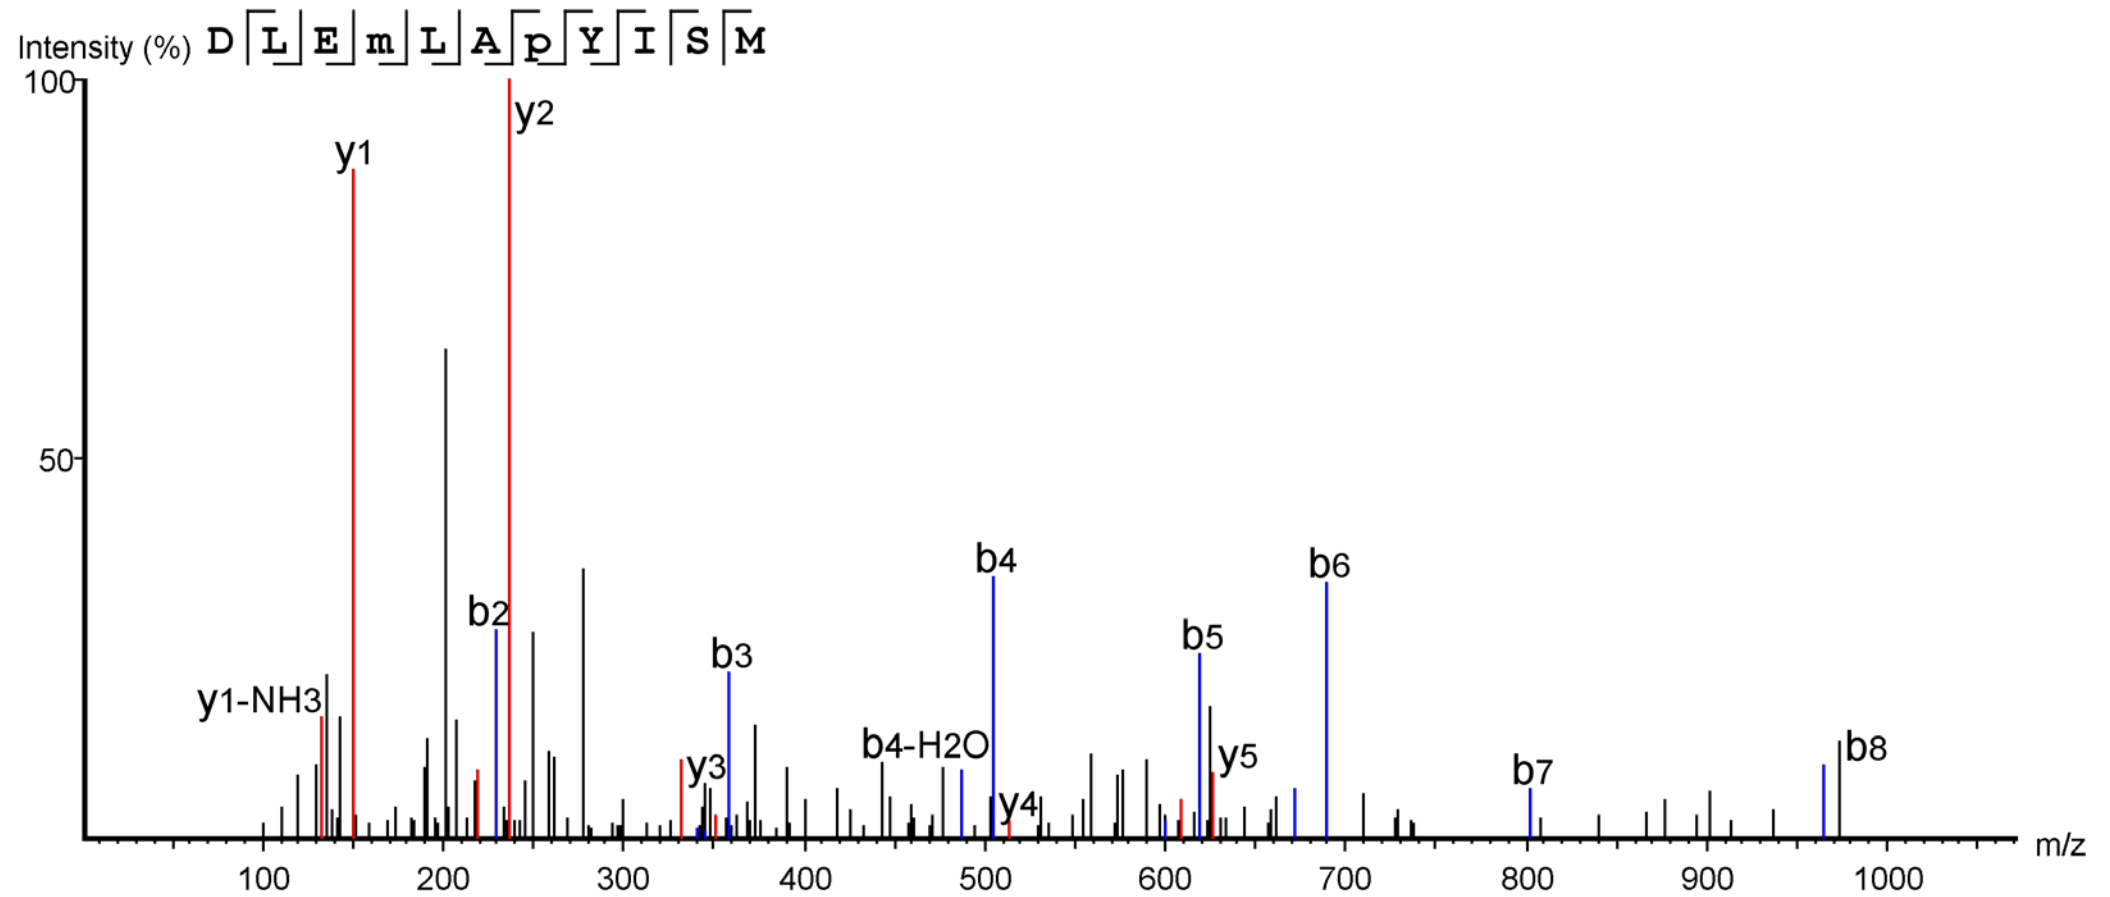

YMT125

Scan #30765

A-365: HIF-3 $\alpha_{(486-496)}$ : DLEM(+15.99)LAP(+15.99)YISM

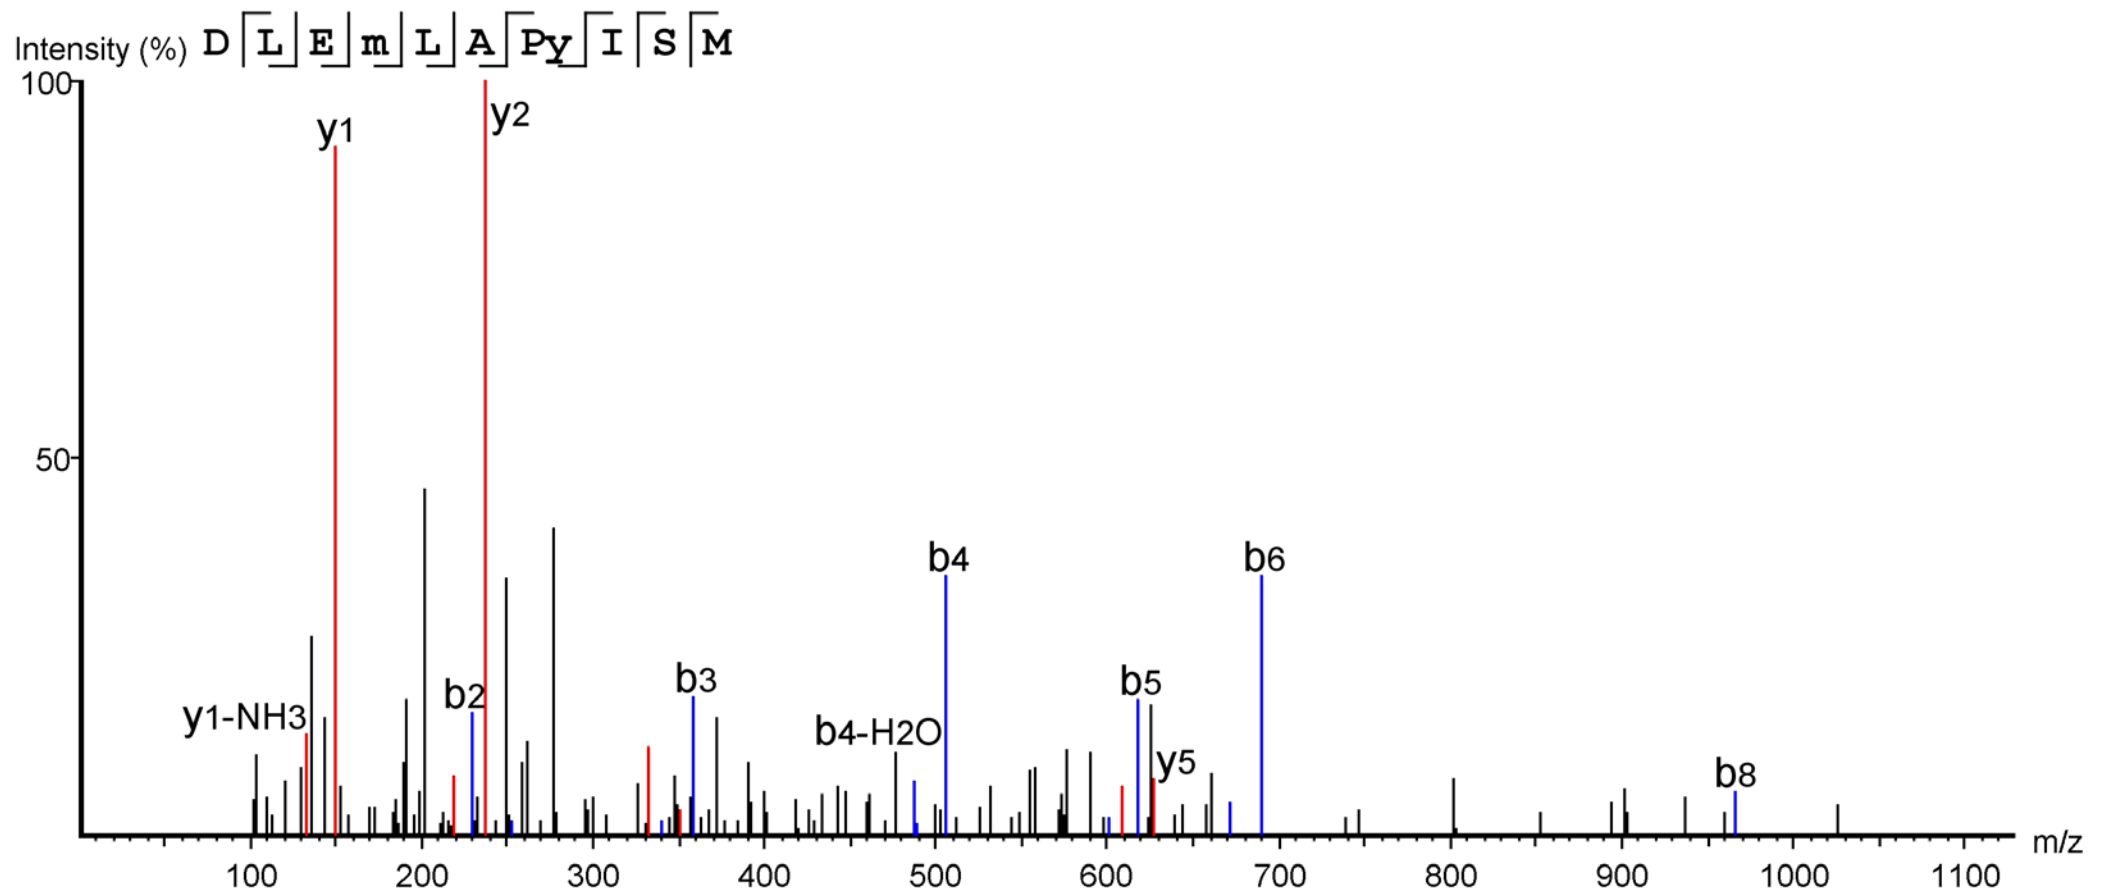

YMT126

Scan #29372

A-366: HIF-3 $\alpha_{(486-496)}$ : DLEMLAP(+15.99)YISM(+15.99)

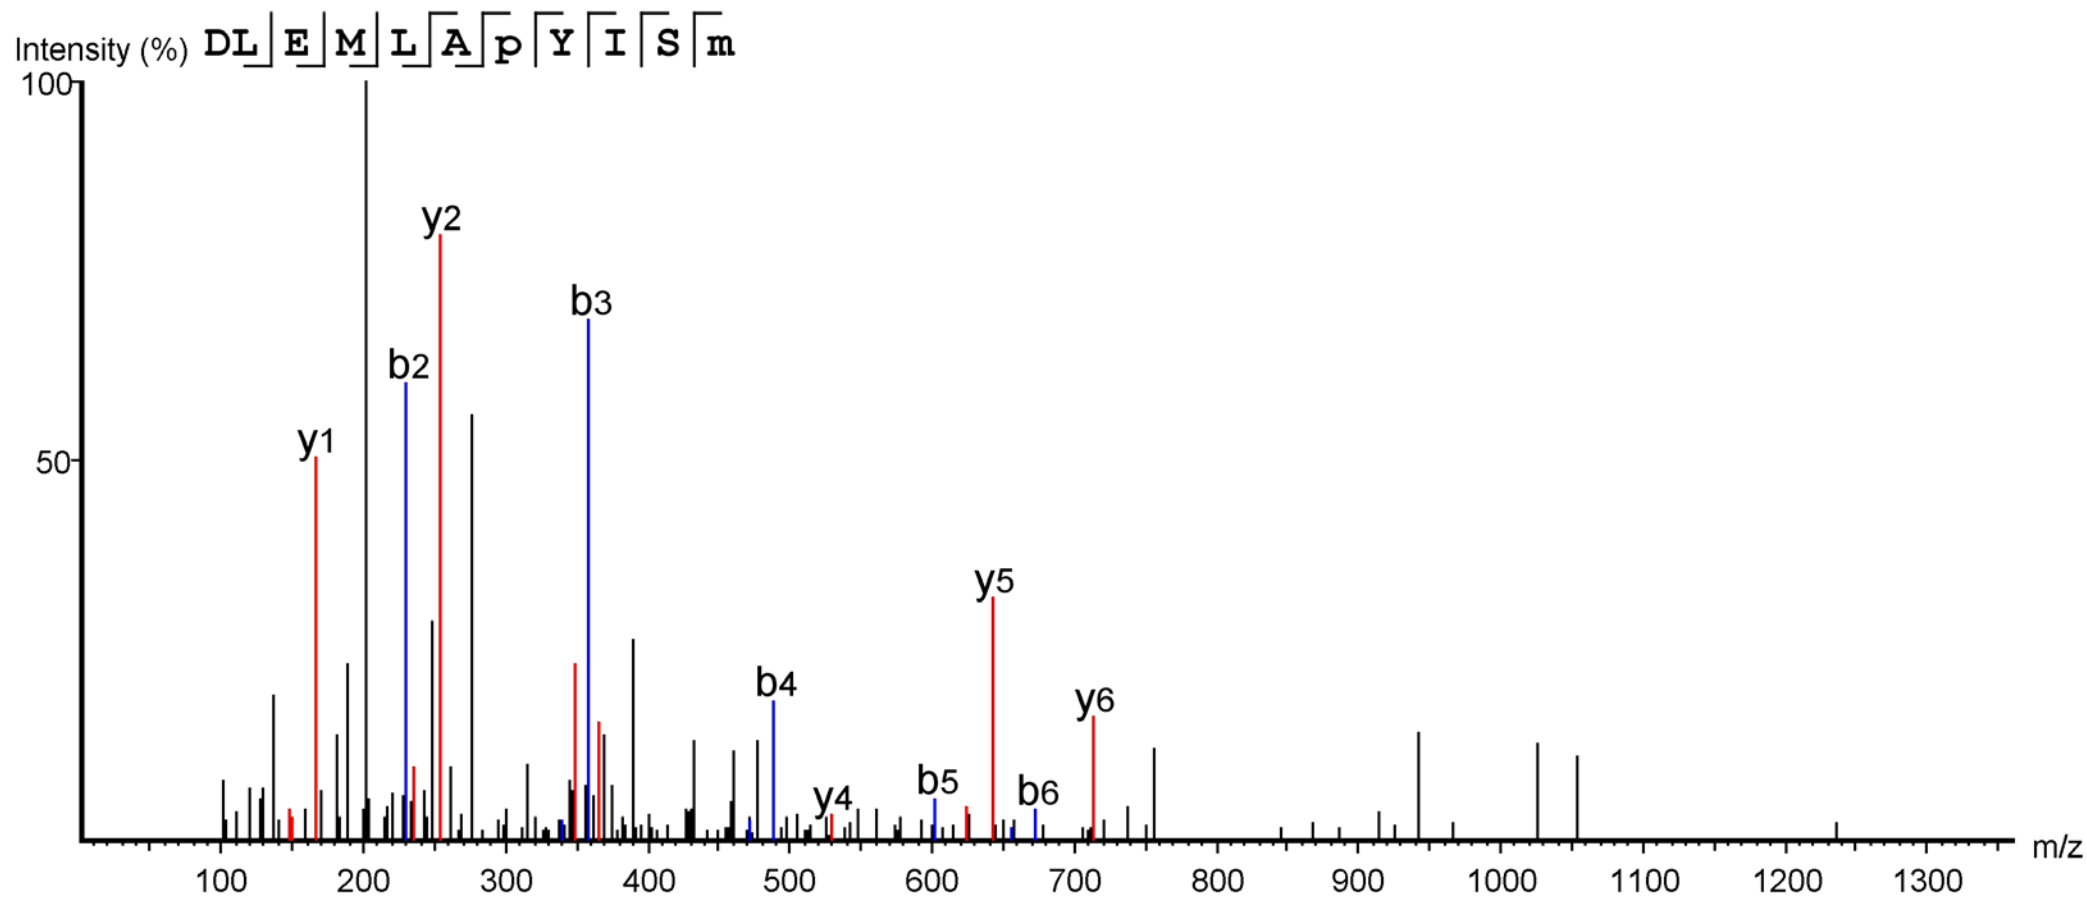

YMT123

Scan #28896

A-367: HIF-3 $\alpha_{(486-496)}$ : DLEMLAP(+15.99)YISM(+15.99)

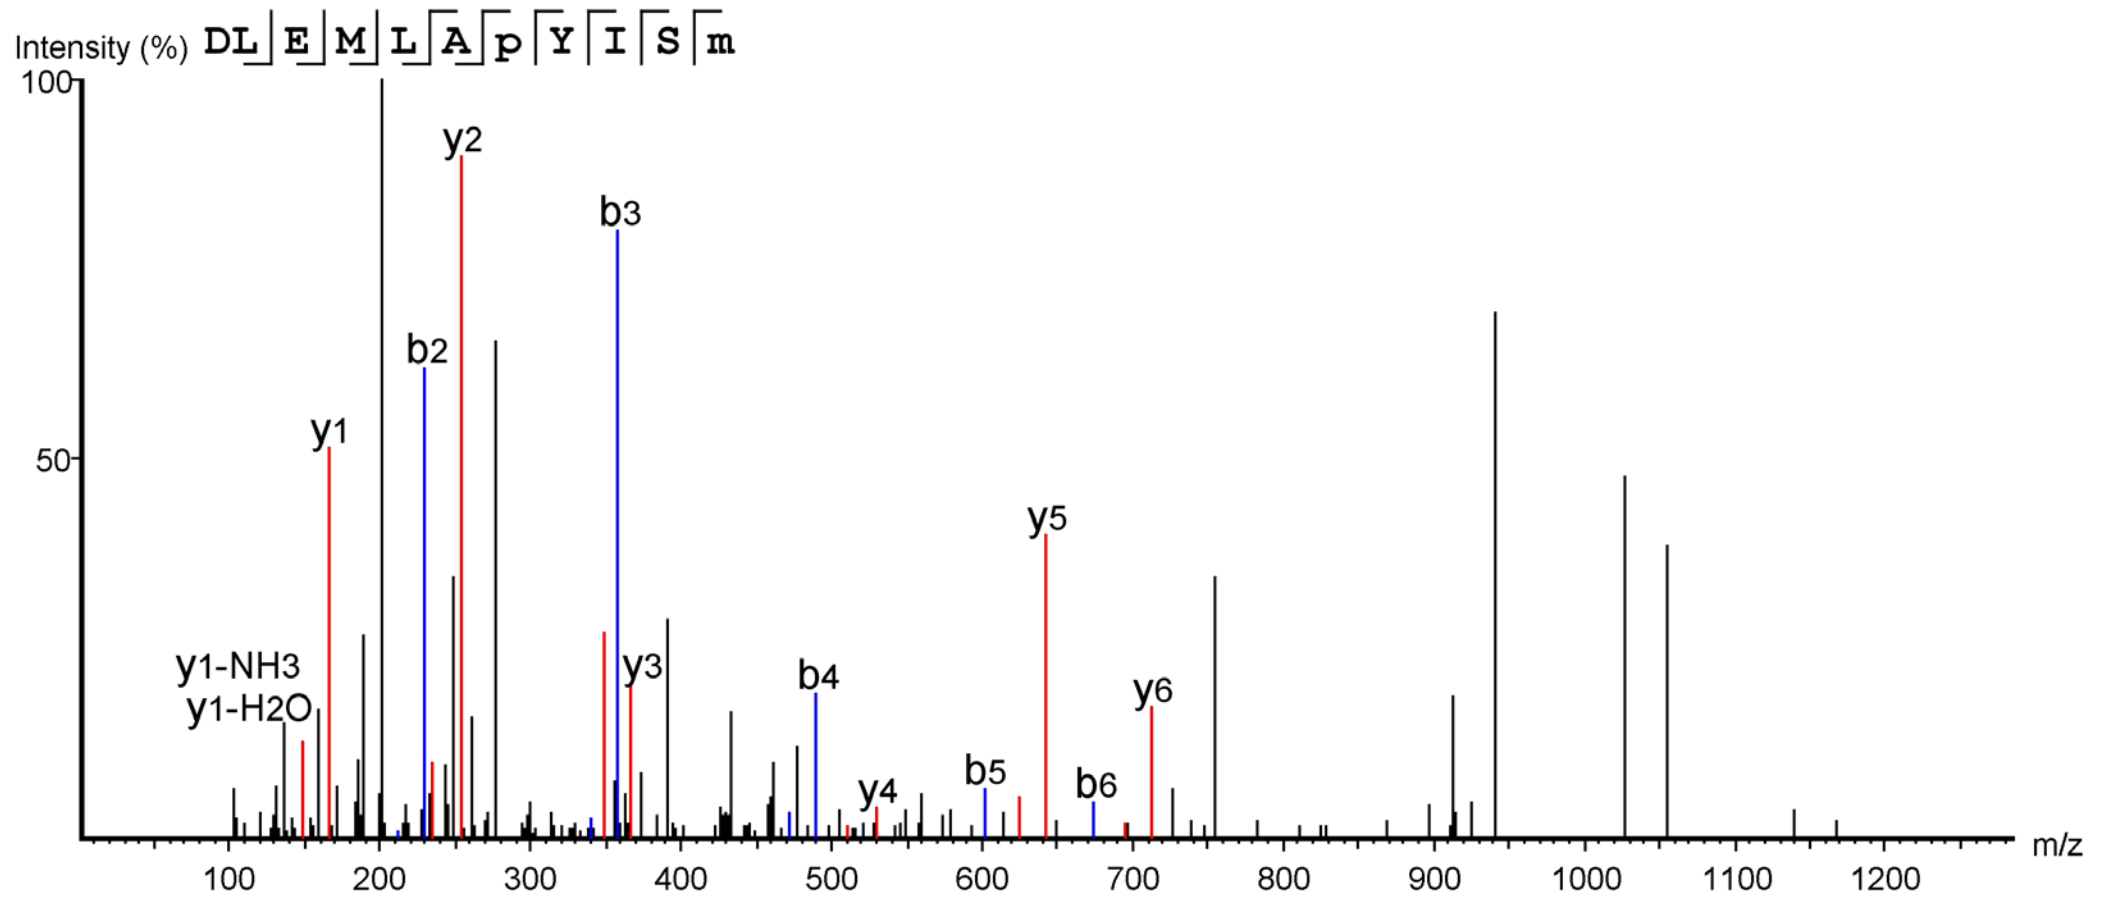

YMT125

Scan #30490

A-368: HIF-3 $\alpha_{(486-496)}$ : DLEMLAP(+15.99)YISM(+15.99)

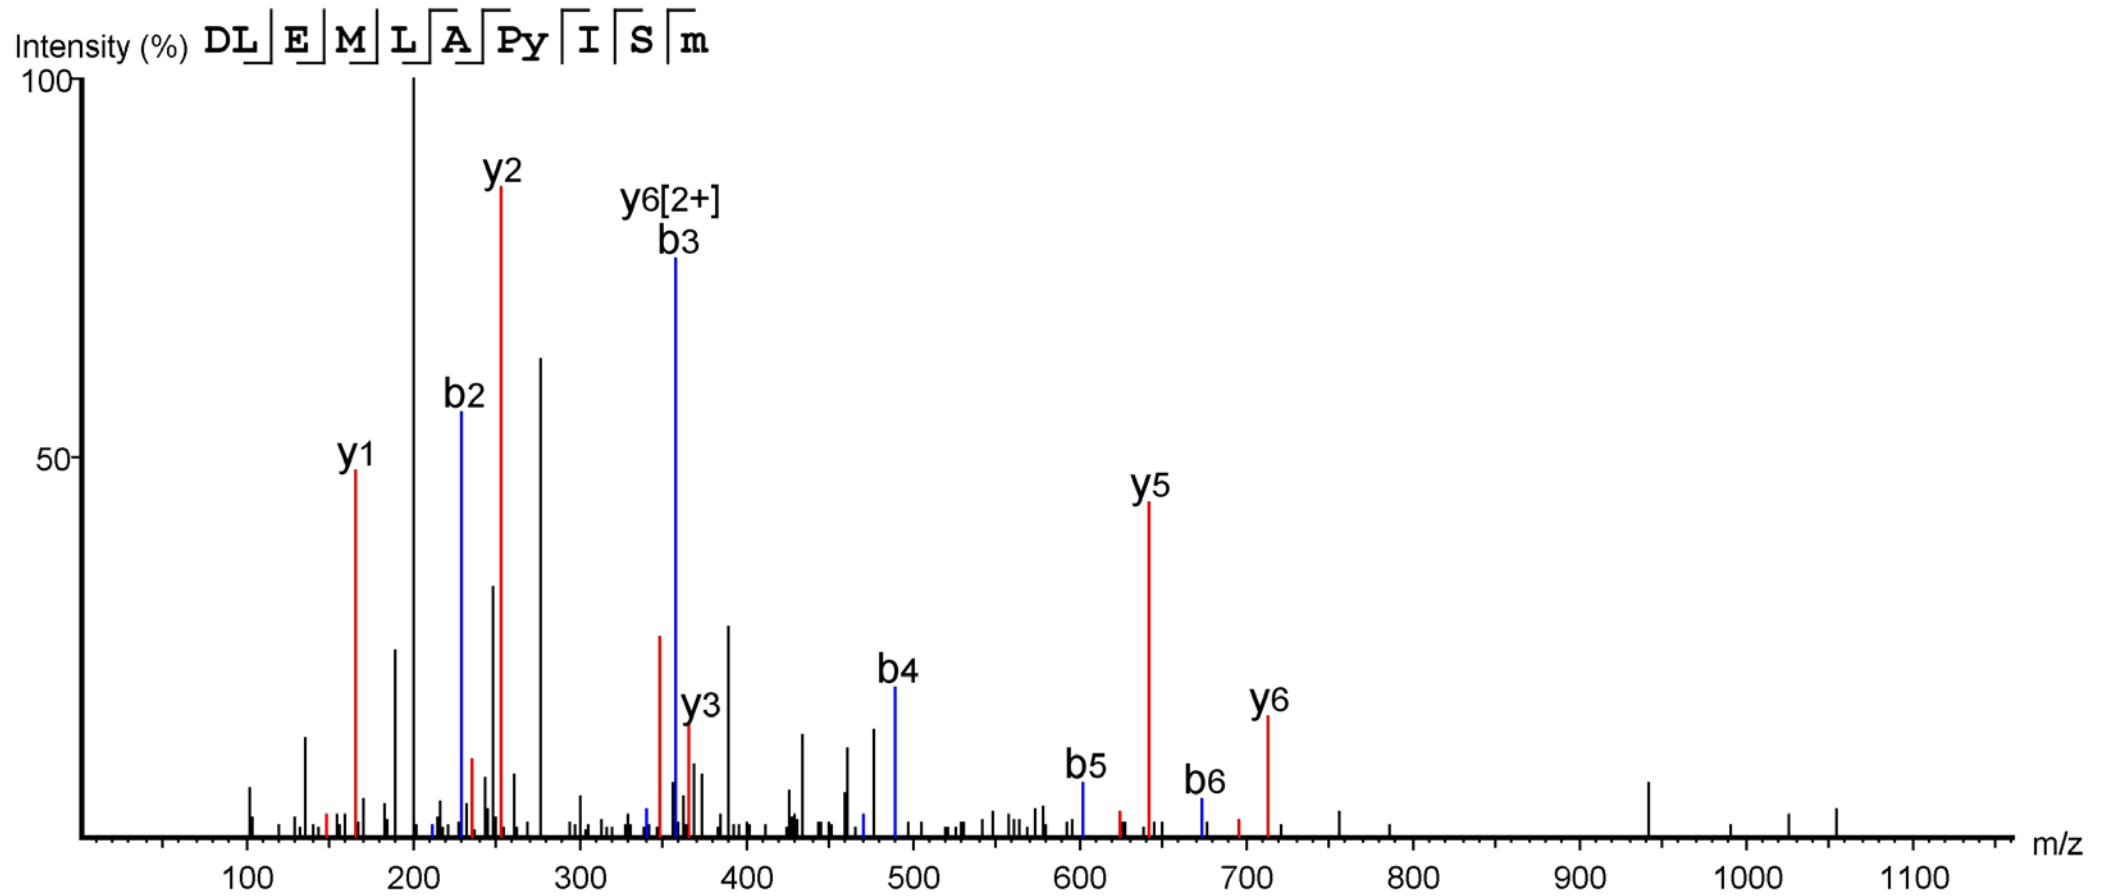

YMT126

Scan #28751



A-369: HIF-3 $\alpha_{(486-496)}$ : DLEM(+15.99)LAPYISM(+15.99)

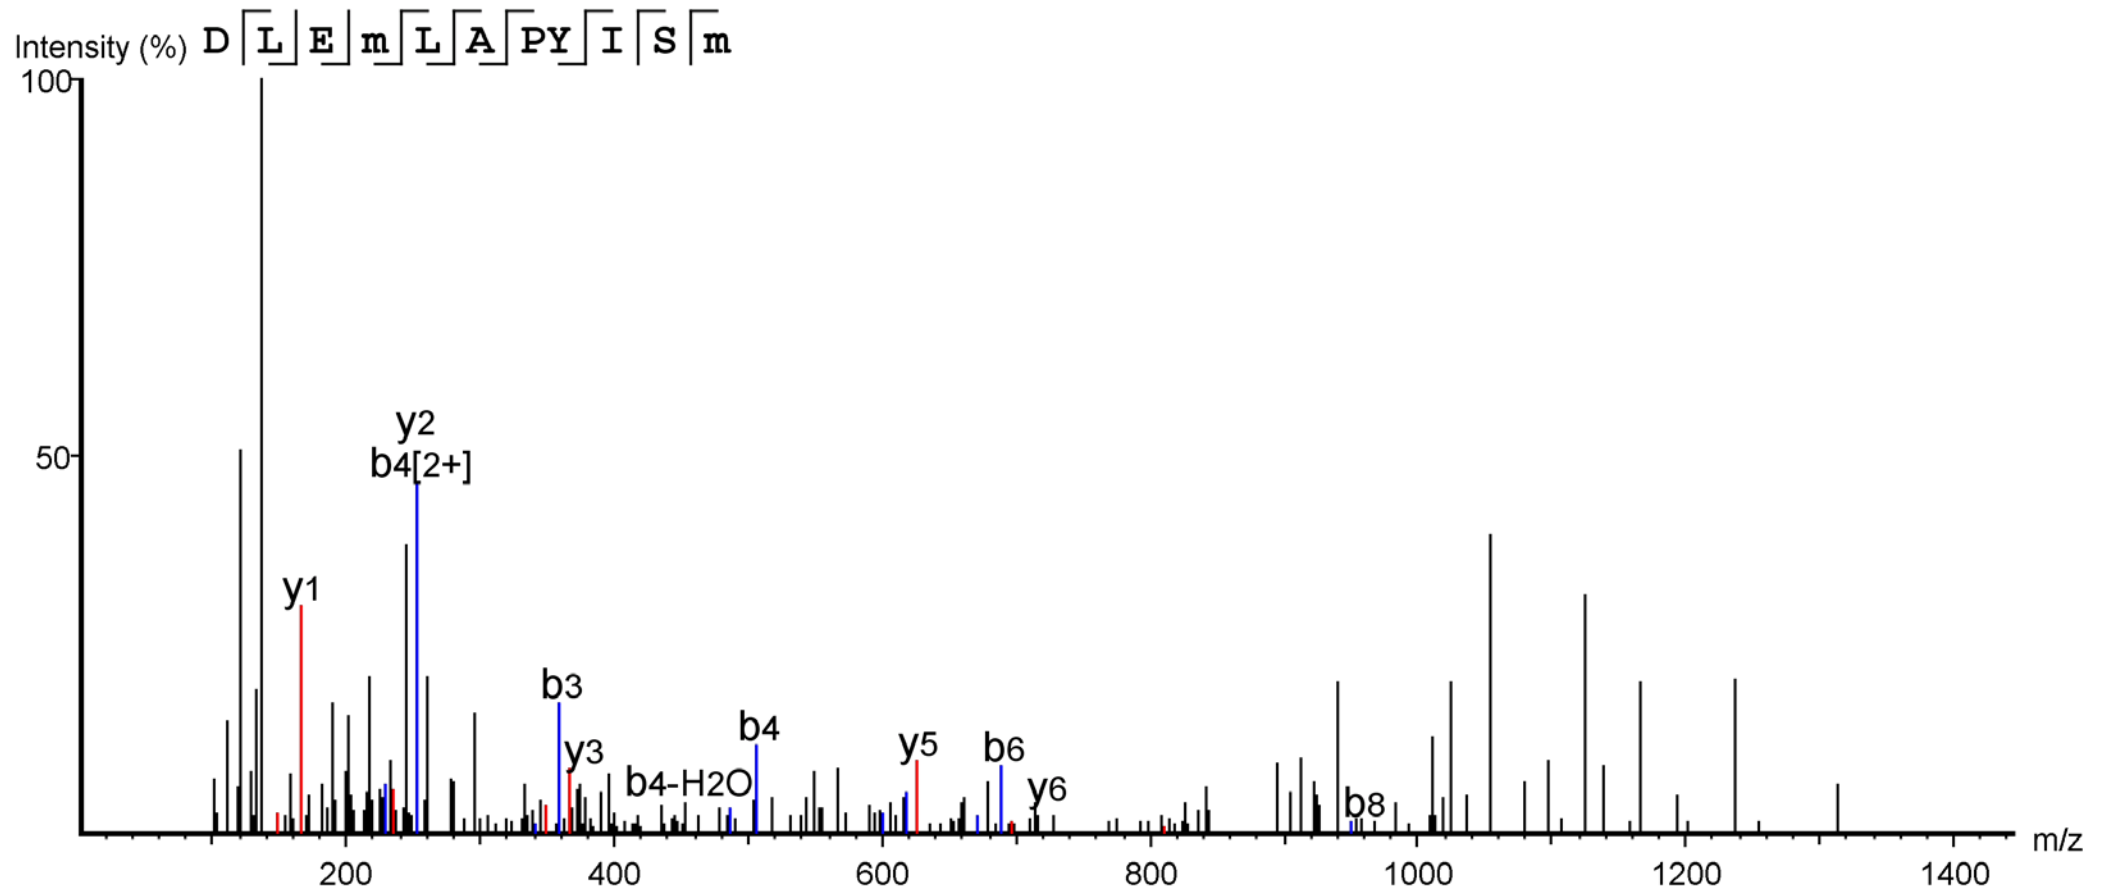

YMT123

Scan #26720

A-370: HIF-3 $\alpha_{(486-496)}$ : DLEM(+15.99)LAPYISM(+15.99)

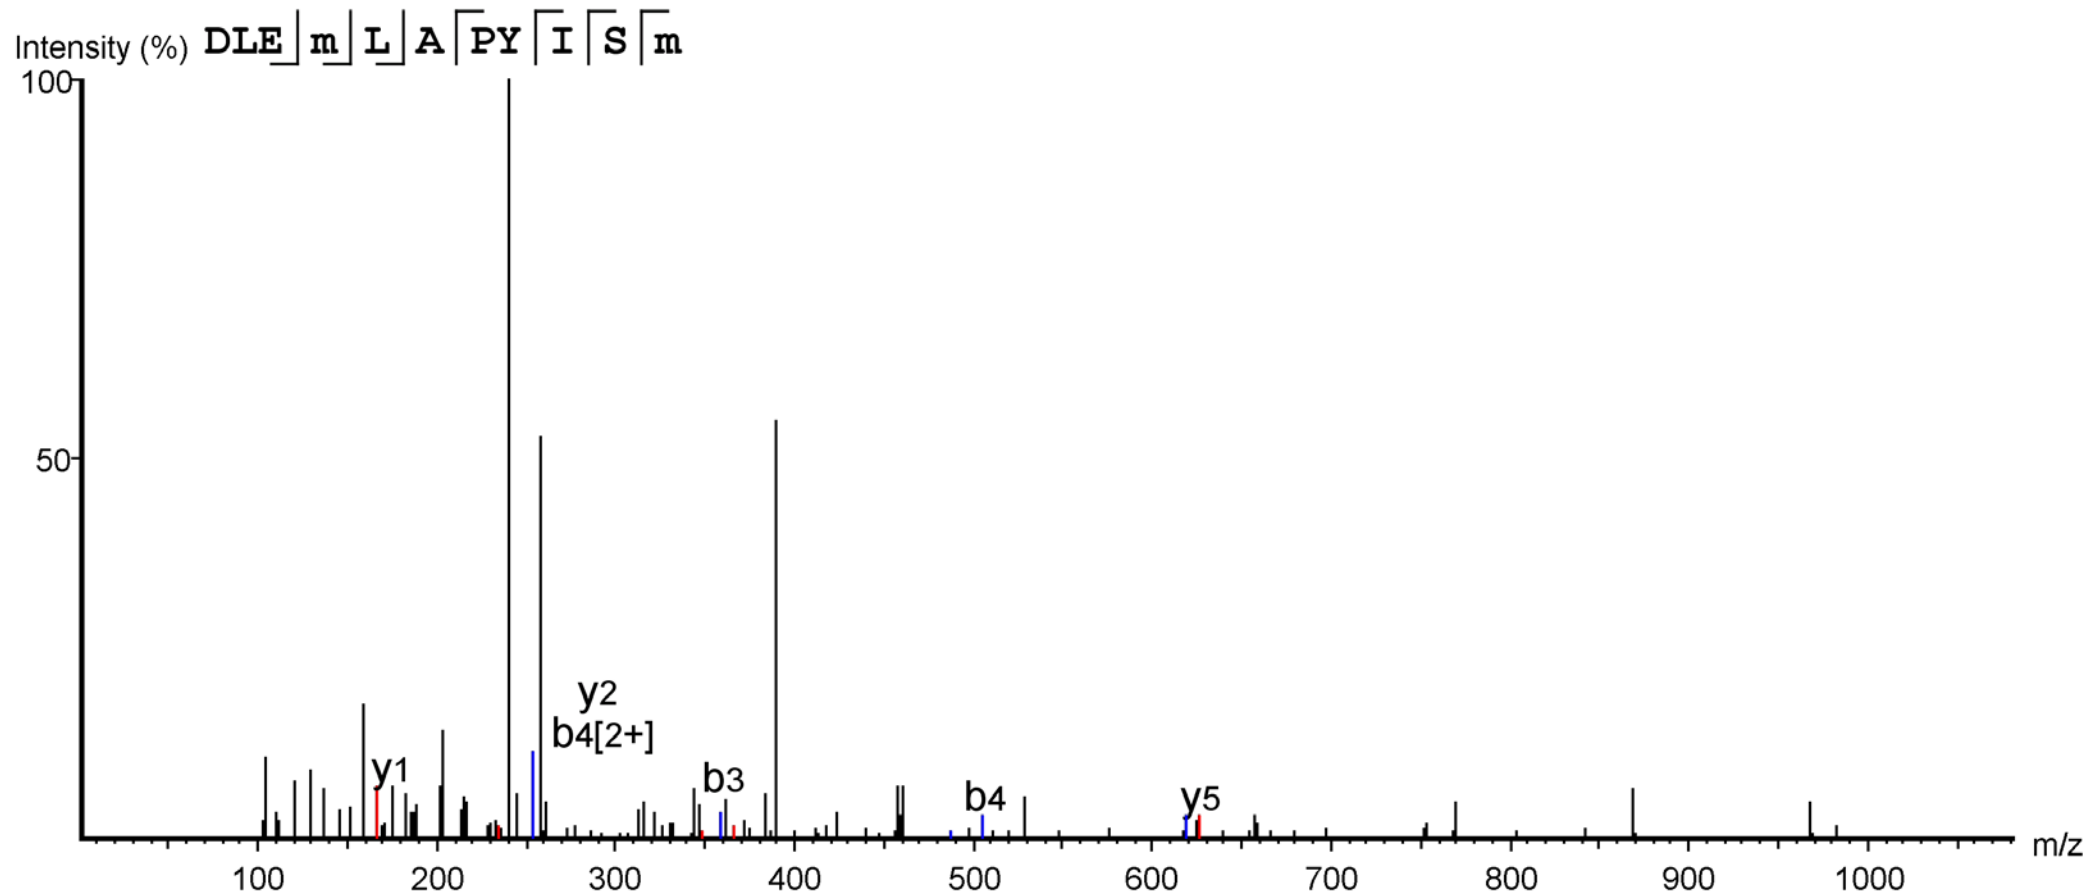

YMT126

Scan #26719

A-371: HIF-3 $\alpha_{(486-496)}$ : DLEM(+15.99)LAP(+15.99)YISM(+15.99)

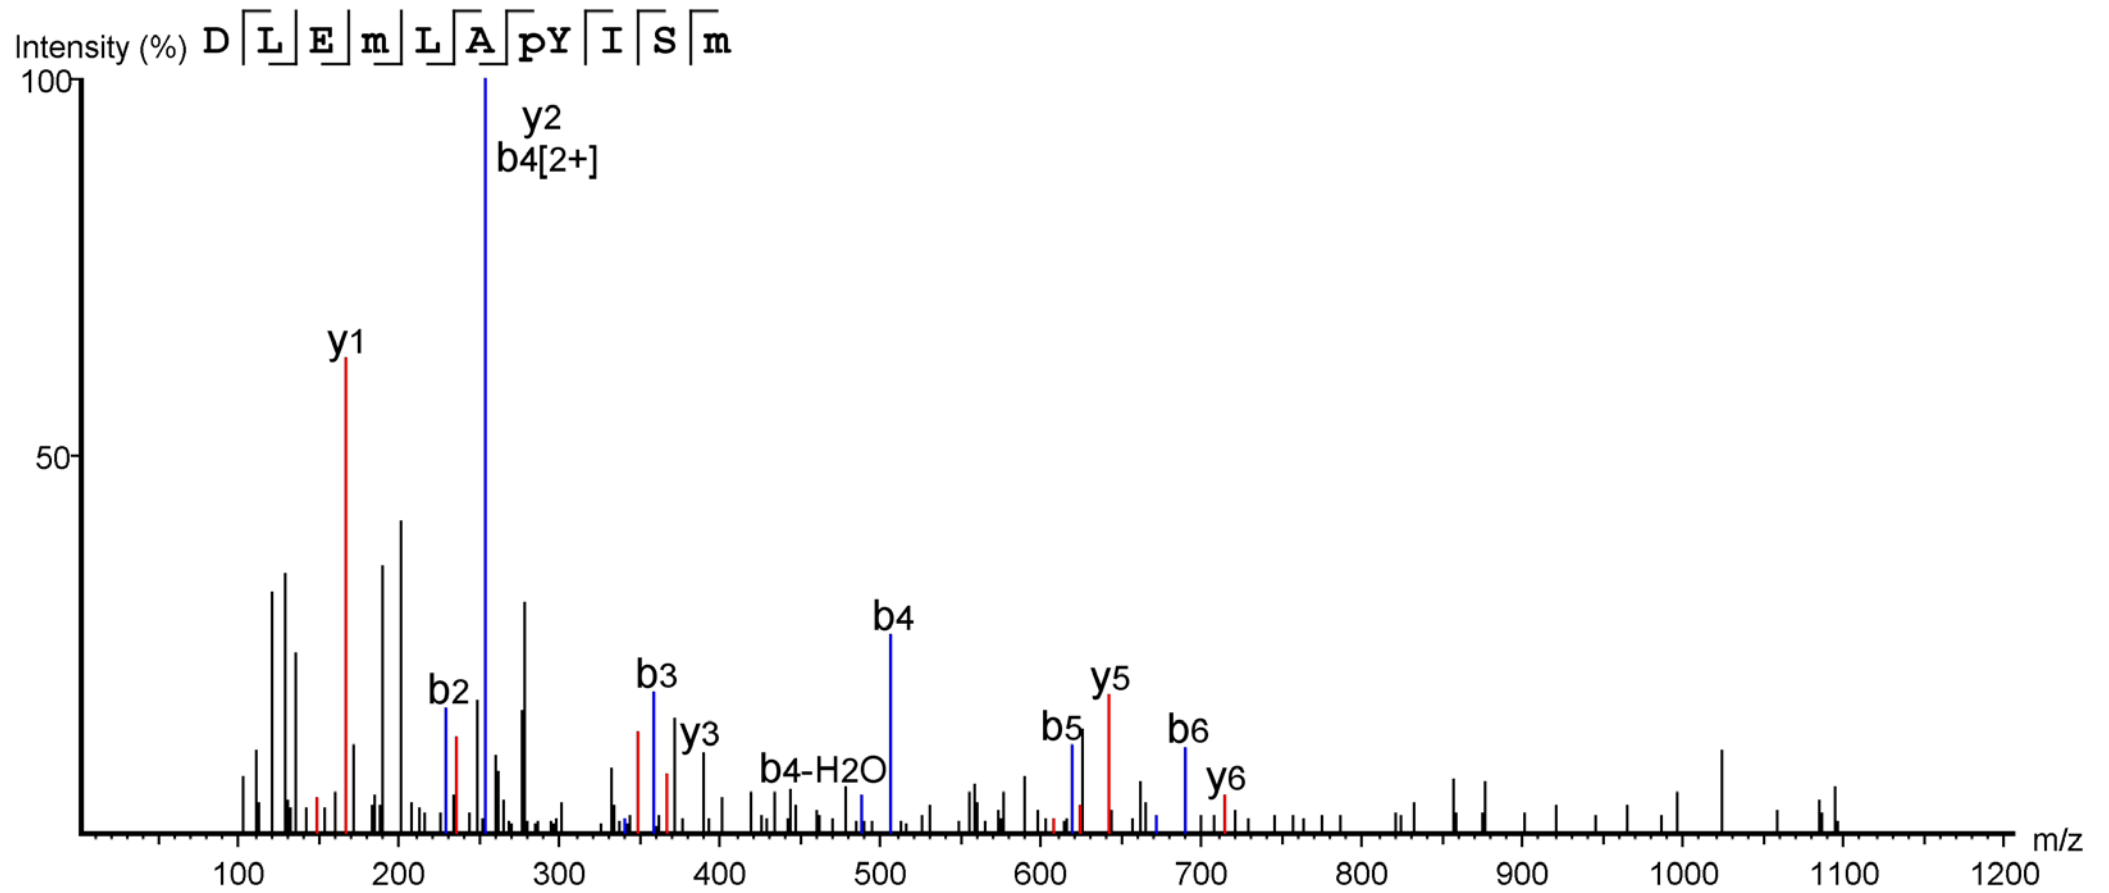

YMT123

Scan #25536

A-372: HIF-3 $\alpha_{(486-496)}$ : DLEM(+15.99)LAP(+15.99)YISM(+15.99)

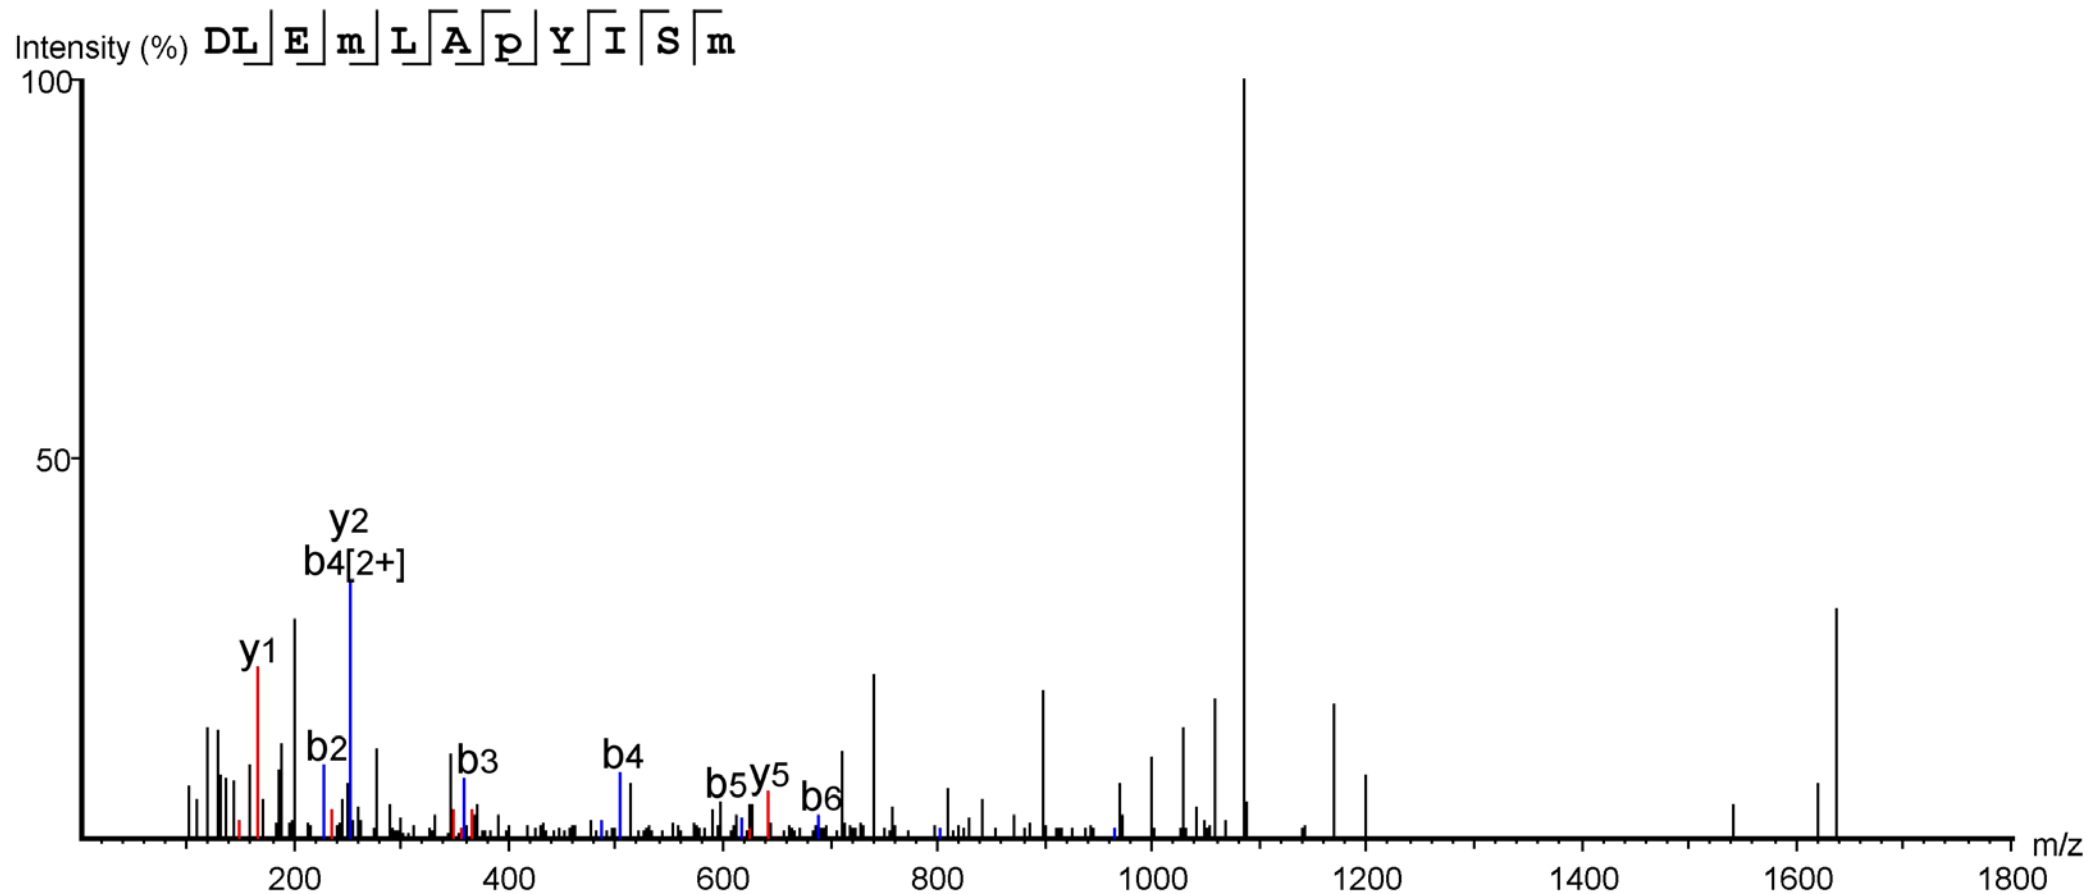

YMT124

Scan #28068

A-373: HIF-3 $\alpha$ <sub>(486-496)</sub>: DLEM(+15.99)LAP(+15.99)YISM(+15.99)

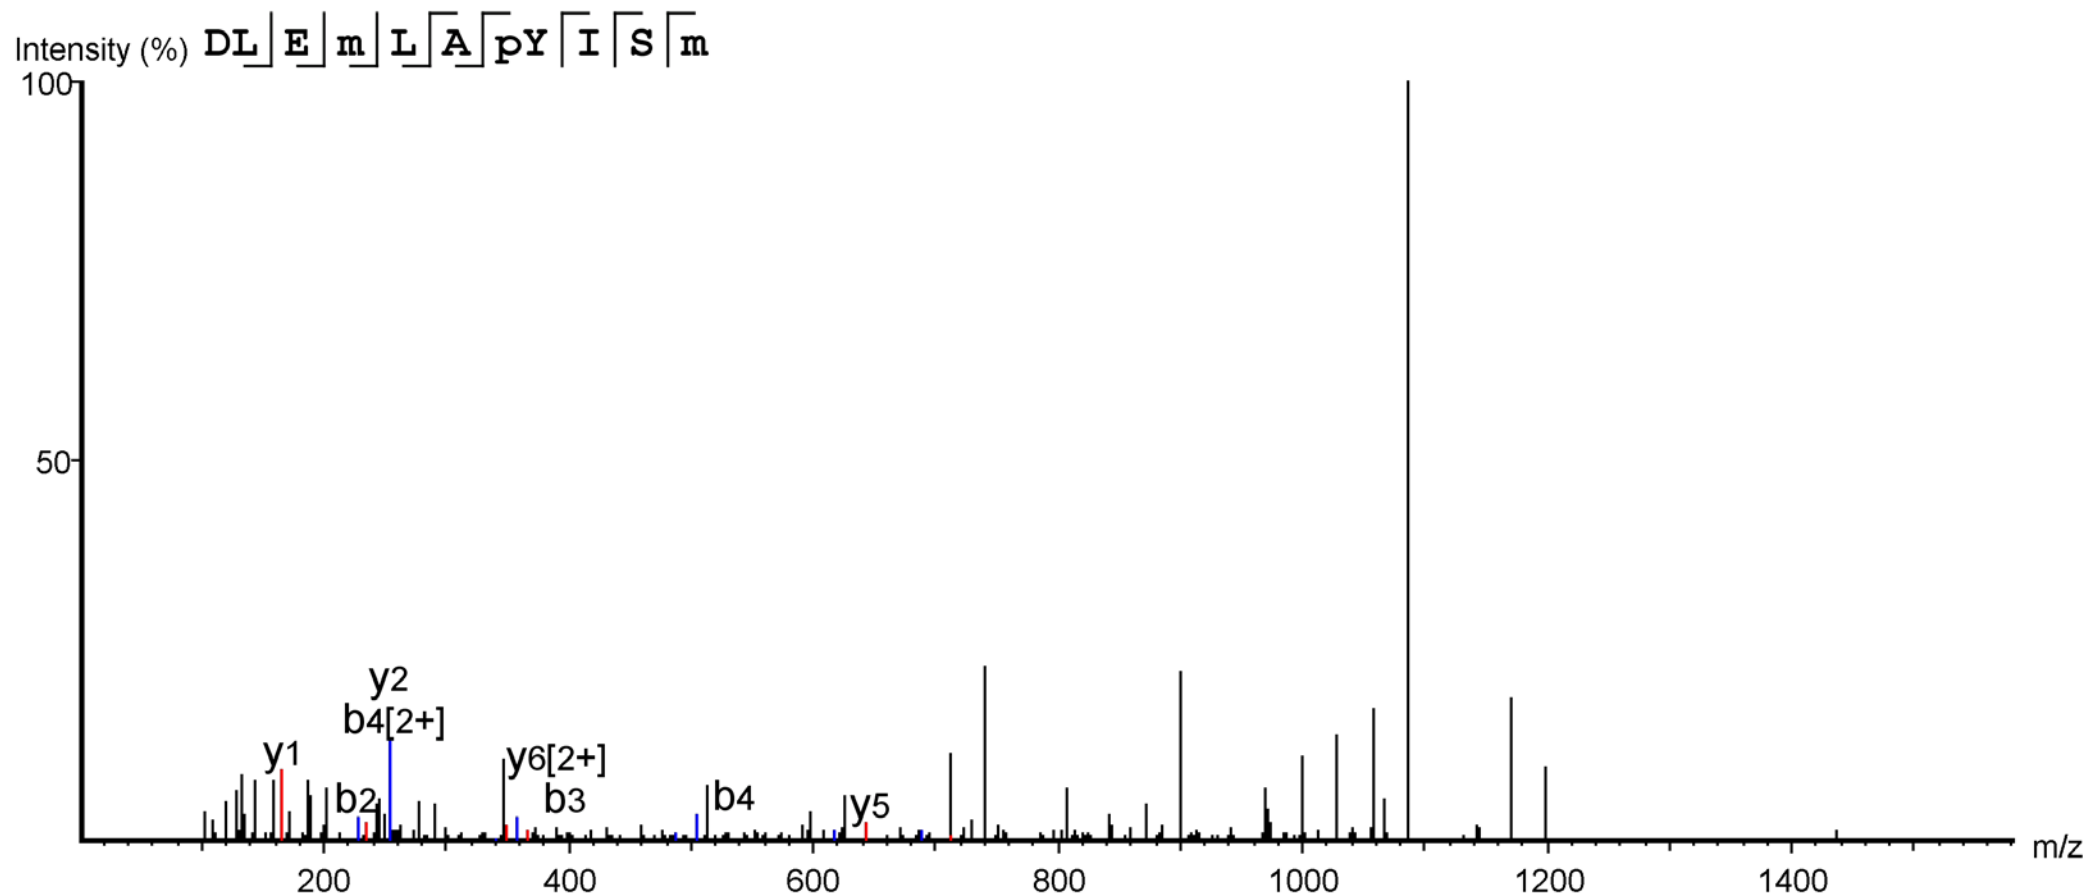

YMT125

Scan #27386

A-374: HIF-3 $\alpha$ <sub>(486-496)</sub>: DLEM(+15.99)LAP(+15.99)YISM(+15.99)

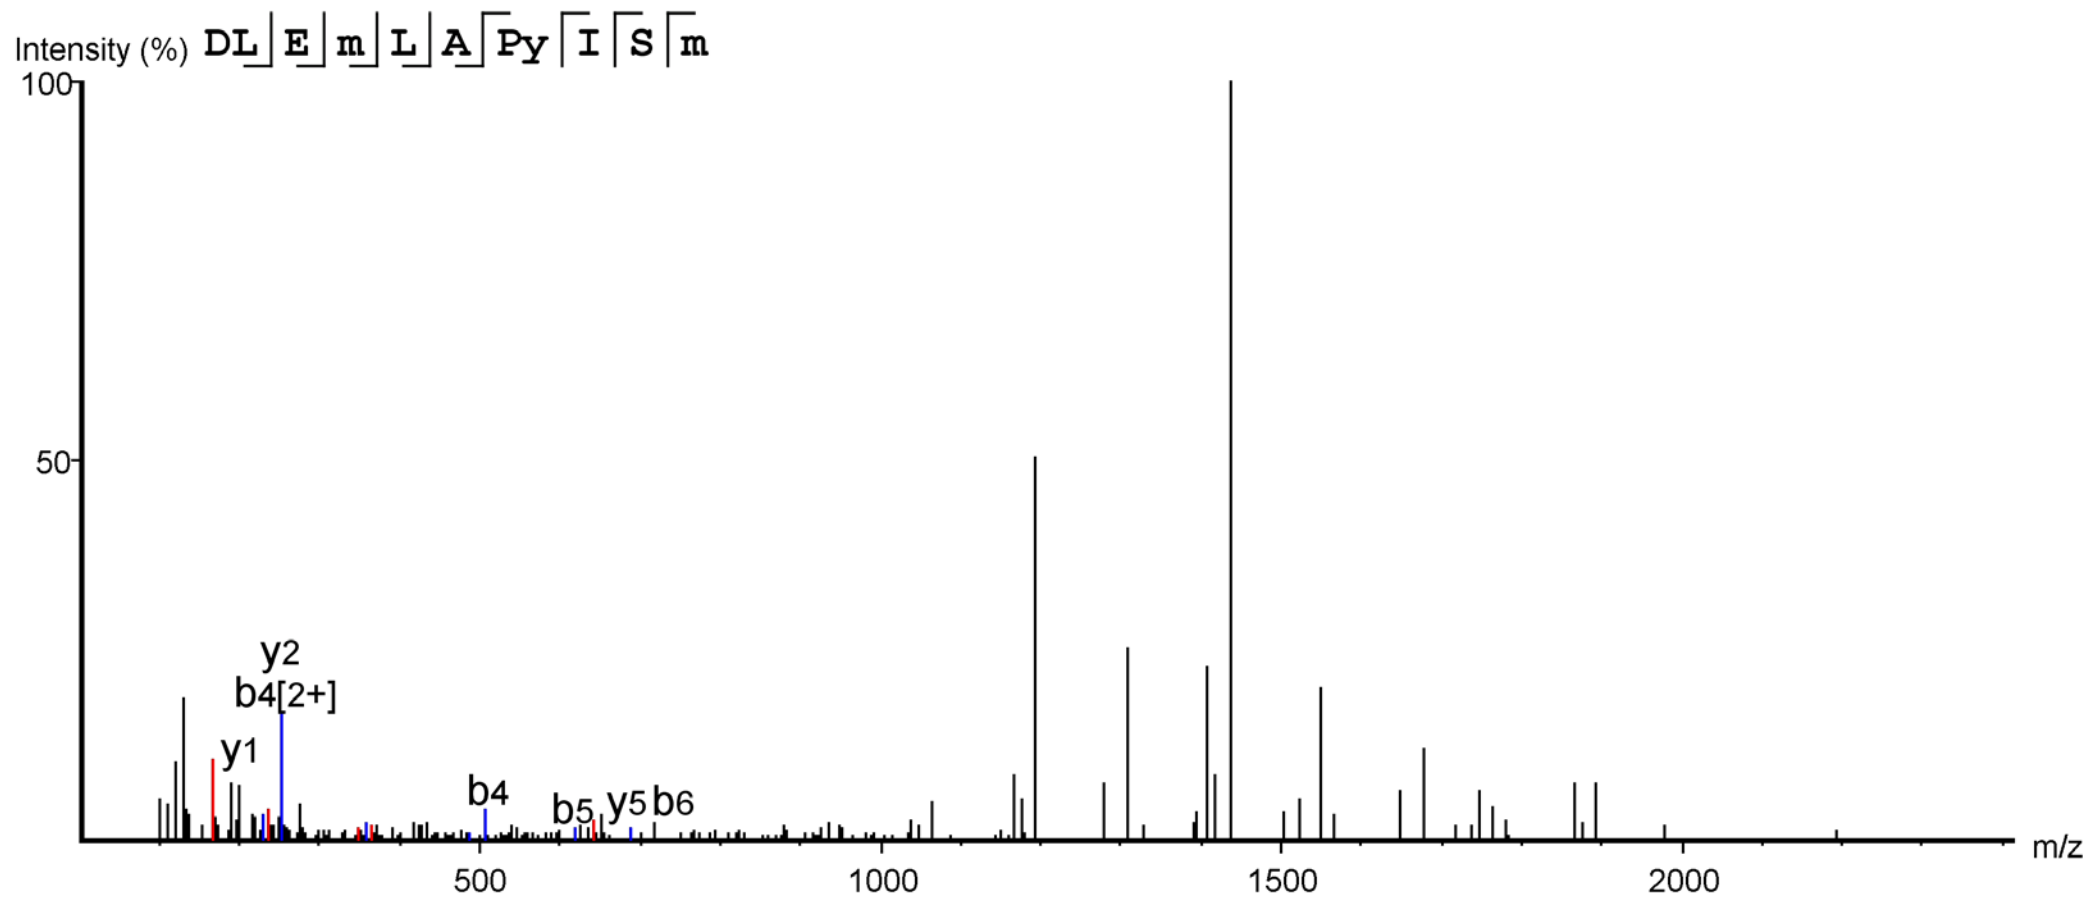

YMT126

Scan #25580
