# Supplementary material for: Lack of activity of recombinant HIF prolyl hydroxylases (PHDs) on reported non-HIF substrates
Source: PubMed Central journal article supplement (PMC6739866; doi:10.7554/elife.46490), 2019-09-10
Supplement: elife-46490-supp3.pdf [file elife-46490-supp3.pdf]

## **Supplementary file 3**

(i)

| Substrate        | PHD Isoform | Peptide Resid. | MS Run  |        |
|------------------|-------------|----------------|---------|--------|
|                  |             |                | Control | Enzyme |
| HIF-1 $\alpha$ * | PHD1        | 392-411        | YMT115  | YMT116 |
|                  |             | 548-575        |         | YMT117 |
|                  | PHD2        | 392-411        |         | YMT118 |
|                  |             | 548-575        |         |        |
|                  | PHD3        | 392-411        |         |        |
|                  |             | 548-575        |         |        |
| HIF-2 $\alpha$   | PHD1        | 393-429        | YMT119  | YMT120 |
|                  |             | 513-550        |         | YMT121 |
|                  | PHD2        | 393-429        |         | YMT122 |
|                  |             | 513-550        |         |        |
|                  | PHD3        | 393-429        |         |        |
|                  |             | 513-550        |         |        |
| HIF-3 $\alpha$   | PHD1        | 486-496        | YMT123  | YMT124 |
|                  | PHD2        |                |         | YMT125 |
|                  | PHD3        |                |         | YMT126 |

(ii)

| Substrate | PHD Isoform | Peptide Resid. | MS Run           |                |        |                        |        |
|-----------|-------------|----------------|------------------|----------------|--------|------------------------|--------|
|           |             |                | Peptide Standard | Alt. Substrate |        | HIF-1 $\alpha$ Control |        |
|           |             |                |                  | Control        | Enzyme | Control                | Enzyme |
| ACACB     | PHD3        | 341-361        | PEP17            | YMT86          | YMT88  | YMT86                  | YMT88  |
|           |             | 436-454        |                  |                |        |                        |        |
| ACTB      | PHD3        | 292-312        | PEP20            | YMT41          | YMT42  | YMT41                  | YMT42  |
|           |             | 316-326        |                  |                |        |                        |        |
| ADRB2     | PHD3        | 376-404        | PEP11            | YMT65          | YMT66  | YMT41                  | YMT42  |
| AKT1      | PHD2        | 122-140        | PEP17            | YMT83          | YMT84  | YMT83                  | YMT84  |
|           |             | 308-328        |                  |                |        |                        |        |
|           |             | 421-436        |                  |                |        |                        |        |
| ATF4      | PHD3        | NT             | -                | YMT45          | YMT46  | YMT41                  | YMT42  |
| CENPN     | PHD2        | 308-329        | PEP14            | YMT39          | YMT40  | YMT51                  | YMT52  |
| CEP192    | PHD1        | 2306-2317      | PEP11            | YMT61          | YMT62  | YMT61                  | YMT62  |
| EEF2K     | PHD2        | 94-111         | PEP17            | YMT69          | YMT70  | YMT69                  | YMT70  |
| EPOR      | PHD3        | 426-453        | PEP14            | YMT63          | YMT64  | YMT25                  | YMT28  |
| FLNA      | PHD2        | 2311-2333      | PEP20            | YMT65          | YMT66  | YMT51                  | YMT52  |
| FOXO3     | PHD1        | 420-444        | PEP14            | YMT59          | YMT60  | YMT59                  | YMT60  |
| IKBKB     | PHD1        | 172-198        | PEP27            | YMT59          | YMT60  | YMT59                  | YMT60  |
| MAPK6     | PHD3        | 20-45          | PEP17            | YMT31          | YMT32  | YMT25                  | YMT28  |
| NDRG3     | PHD2        | 287-301        | PEP11            | YMT23          | YMT24  | YMT57                  | YMT58  |
| PDE4D     | PHD2        | 370-383        | PEP11            | YMT69          | YMT70  | YMT69                  | YMT70  |
|           |             | 411-431        | PEP17            |                |        |                        |        |
| PKM       | PHD3        | 401-422        | PEP20            | YMT55          | YMT56  | YMT41                  | YMT42  |
| PPP2R2A   | PHD2        | 310-330        | PEP27            | YMT79          | YMT80  | YMT82                  | PEP14  |
| SPRY2     | PHD1        | 5-19           | PEP11            | YMT29          | YMT30  | YMT25                  | YMT26  |
|           |             | 131-151        | PEP17            |                |        |                        |        |
|           |             | 156-168        |                  |                |        |                        |        |
|           | PHD3        | 5-19           | PEP11            | YMT47          | YMT48  | YMT65                  | YMT66  |
|           |             | 131-151        | PEP17            |                |        |                        |        |
| 156-168   |             |                |                  |                |        |                        |        |
| TELO2     | PHD3        | 363-377        | PEP11            | YMT47          | YMT48  | YMT65                  | YMT66  |
| THRA      | PHD2        | 153-176        | PEP21            | YMT93          | YMT94  | YMT93                  | YMT94  |
|           | PHD3        |                |                  | YMT93          | YMT95  | YMT93                  | YMT95  |
| TP53      | PHD1        | 140-156        | PEP27            | YMT31          | YMT32  | YMT25                  | YMT26  |
|           | PHD3        | 358-370        | PEP13            | YMT113         | YMT114 | YMT109                 | YMT110 |
| TRPA1     | PHD2        | 391-403        | PEP11            | YMT71          | YMT72  | YMT69                  | YMT70  |
