# Supplementary material for: Lack of activity of recombinant HIF prolyl hydroxylases (PHDs) on reported non-HIF substrates
Source: PubMed Central journal article supplement (PMC6739866; doi:10.7554/elife.46490), 2019-09-10
Supplement: elife-46490-supp4.pdf [file elife-46490-supp4.pdf]

## **Supplementary file 4**

| Substrate  | <sup>3</sup> H Hyp assay | IVTT MSMS Hydroxylation assay |             | Peptide MS Hydroxylation assay |             |
|------------|--------------------------|-------------------------------|-------------|--------------------------------|-------------|
|            | Replicate #              | Target Residue                | Replicate # | Peptide Name                   | Replicate # |
| ACACB      | 2                        | P343                          | 2           | NT                             | -           |
|            |                          | P450                          | 2           | ACACB/438-462                  | 1           |
| ACTB       | 2                        | P307                          | 2           | ACACB/445-462                  | 1           |
|            |                          | P322                          | 2           | ACTB/295-319                   | 3           |
| ADRB2      | 1                        | P382                          | 1           | ACTB/310-334                   | 3           |
|            |                          | P395                          | 1           | ADRB2/370-394                  | 3           |
| AKT1       |                          | P125                          | 2           | ADRB2/383-407                  | 3           |
|            |                          | P313, P318                    | 2           | AKT1/113-137                   | 3           |
|            |                          |                               |             | AKT1/115-134                   | 3           |
|            |                          |                               |             | AKT1/301-325                   | 3           |
|            |                          |                               |             | AKT1/307-328                   | 3           |
| P423       | 2                        | AKT1/311-330                  | 3           |                                |             |
| ATF4       | 2                        | P156, P162, P164, P167        | 1           | NT                             | -           |
|            |                          | P174                          | 1           | ATF4/144-168                   | 3           |
| CENPN/iso1 | 2                        | P311                          | 1           | ATF4/157-182                   | 3           |
|            |                          |                               |             | CENPN/299-323_iso1             | 1           |
|            |                          |                               |             | CENPN/299-323_iso3             | 1           |
| CEP192     | 2                        | P2313                         | 1           | CENPN/308-317_iso3             | 1           |
|            |                          |                               |             | CEP192/2303-2326               | 3           |
| EEF2K      | 2                        | P98                           | 2           | CEP192/2306-2317               | 3           |
| EPOR       | 2                        | P443, P450                    | 2           | EEF2K/86-110                   | 3           |
|            |                          |                               |             | EPOR/434-458                   | 3           |
| FLNA       | 2                        | P2317, P2324                  | 1           | EPOR/441-455                   | 3           |
| FOXO3      | 2                        | P426, P437                    | 2           | FLNA/P2310-2333                | 3           |
|            |                          |                               |             | FOXO3/414-438                  | 3           |
| IKBKB      | 2                        | P191                          | 1           | FOXO3/425-448                  | 3           |
|            |                          |                               |             | IKBKB/180-204                  | 3           |
| MAPK6      | 2                        | P25                           | 1           | MAPK6/13-37                    | 1           |
| NDRG3      | 2                        | P294                          | 2           | NDRG3/282-306                  | 3           |
| PDE4D      | 2                        | P19                           | -           | PDE4D/17-41                    | 3           |
|            |                          | P381                          | 1           | PDE4D/370-394                  | 3           |
|            |                          | P419                          | 1           | PDE4D/407-431                  | 3           |
| PKM        | 1                        | P403, P408                    | 1           | PKM/391-415                    | 3           |
|            |                          |                               |             | PKM/396-422                    | 3           |
| PPP2R2A    | 2                        | P319                          | 1           | PPP2R2A/308-332                | 1           |
|            |                          |                               |             | PPP2R2A/311-329                | 1           |
| POLR2A     | NT                       | P1465                         | NT          | POLR2A/1456-1476               | 3           |
| SPRY2      | 2                        | P18, P144, P160               | 1           | SPRY2/6-30                     | 3           |
|            |                          |                               |             | SPRY2/132-156                  | 3           |
|            |                          |                               |             | SPRY2/148-172                  | 3           |
| TELO2      | 1                        | P374                          | 1           | TELO2/362-386                  | 3           |
|            |                          | P419, P422                    | -           | TELO2/409-433                  | 3           |
| THRA       | 2                        | P160, P162                    | 2           | THRA/149-173                   | 1           |
| TP53       | 2                        | P142                          | 1           | NT                             | -           |
|            |                          | P359                          | 1           | TP53/347-371                   | 1           |
| TRPA1      | 1                        | P394                          | 1           | TRPA1/382-406                  | 3           |
|            |                          |                               |             | TRPA1/386-405                  | 3           |
